# Supplementary material for: Ring-opening fluorination of bicyclic azaarenes
Source: PubMed Central journal article supplement (PMC8768879; doi:10.1039/d1sc06273e), 2021-12-21

## Supplementary Information

---

### Ring-Opening Fluorination of Bicyclic Azaarenes

Masaaki Komatsuda,<sup>1</sup> Ayane Suto,<sup>1</sup> Hiroki Kondo Jr.,<sup>1</sup> Hiroyuki Takada,<sup>2</sup> Kenta Kato,<sup>1</sup> Bunnai Saito,<sup>2</sup>  
and Junichiro Yamaguchi\*

<sup>1</sup> *Department of Applied Chemistry, Waseda University, 513 Wasedaturumakicho, Shinjuku, Tokyo  
162-0041, Japan*

<sup>2</sup> *Research, Takeda Pharmaceutical Company Limited, 26-1, Muraoka-Higashi 2-chome, Fujisawa, Kanagawa  
251-8555, Japan*

E-mail: junyamaguchi@waseda.jp

---

### Table of Contents

|                                                                      |          |
|----------------------------------------------------------------------|----------|
| 1. General                                                           | S2       |
| 2. Preparation of Pyrazolo[1,5- <i>a</i> ]pyridines <b>1</b>         | S3–S15   |
| 3. Preparation of Other Bicyclic or Tricyclic Azaarenes <b>1</b>     | S15–S20  |
| 4. Ring-Opening Fluorination of Bicyclic Azaarenes <b>1</b>          | S20–S34  |
| 5. Effect of Parameters                                              | S35–S37  |
| 6. Fluorination Tracking by <sup>1</sup> H NMR                       | S38      |
| 7. Another Role of Selectfluor <sup>®</sup>                          | S39–S40  |
| 8. Fluorination of <b>5</b> and <b>7</b>                             | S40–S41  |
| 9. Studies Toward Asymmetric Fluorination                            | S42–S55  |
| 10. Derivatization of Products                                       | S55–S58  |
| 11. References                                                       | S59–S60  |
| 12. <sup>1</sup> H, <sup>13</sup> C, and <sup>19</sup> F NMR Spectra | S60–S283 |

## 1. General

Unless otherwise noted, all reactants or reagents including dry solvents were obtained from commercial suppliers and used as received. Selectfluor<sup>®</sup> and *N*-fluorobenzenesulfonimide (NFSI) were obtained from TCI. (DHQD)<sub>2</sub>PHAL was obtained from KANTO chemical. 6-Bromopyrazolo[1,5-*a*]pyrimidine (**7**) was obtained from Combi-Blocks. 3-Phenylpyrazolo[1,5-*a*]pyridine (**1A**),<sup>[1]</sup> 3-(*p*-tolyl)pyrazolo[1,5-*a*]pyridine (**1B**),<sup>[1]</sup> 3-(4-(*tert*-butyl)phenyl)pyrazolo[1,5-*a*]pyridine (**1C**),<sup>[1]</sup> 3-mesitylpyrazolo[1,5-*a*]pyridine (**1E**),<sup>[1]</sup> 3-(naphthalen-2-yl)pyrazolo[1,5-*a*]pyridine (**1F**),<sup>[1]</sup> 3-(4-(trifluoromethyl)phenyl)pyrazolo[1,5-*a*]pyridine (**1J**),<sup>[1]</sup> 3-(4-chlorophenyl)pyrazolo[1,5-*a*]pyridine (**1L**),<sup>[2]</sup> pyrazolo[1,5-*a*]pyridine-3-carbonitrile (**1Q**),<sup>[3]</sup> ethyl pyrazolo[1,5-*a*]pyridine-3-carboxylate (**1S**),<sup>[4]</sup> pyrazolo[1,5-*a*]pyridine-3-carboxylic acid (**1Y**),<sup>[1]</sup> 3-phenylpyrazolo[1,5-*a*]pyrimidine (**1AG**),<sup>[5]</sup> zaleplon (**1AM**),<sup>[6]</sup> and 2,3-diphenylpyrazolo[1,5-*a*]pyridine (**5**)<sup>[1]</sup> were synthesized according to procedures and the spectra matched with those of compounds reported in the literature. Unless otherwise noted, all reactions were performed with dry solvents under an atmosphere of N<sub>2</sub> in dried glassware using standard vacuum-line techniques. All ring-opening fluorinations of azaarenes were performed in an 8-mL glass vessel tube equipped with a screw cap and heated (IKA Plate RCT digital) in a 16-well aluminum reaction block (IKA DB4.3 Block) unless otherwise noted. All work-up and purification procedures were carried out with reagent-grade solvents in air. Analytical thin-layer chromatography (TLC) was performed using Silica-gel 70 TLC Plate-Wako (0.25 mm). The developed chromatogram was analyzed by UV lamp (254, 365 nm). Flash column chromatography was performed with Biotage Isolera<sup>®</sup> equipped with Biotage Sfär Cartridge Silica D columns and hexane/EtOAc as an eluent. Preparative thin-layer chromatography (PTLC) was performed using Wakogel B5-F silica coated plates (0.75 mm) prepared in our laboratory. Preparative recycling gel permeation chromatography (GPC) was performed with a JAI LaboACE LC-5060 instrument equipped with JAIGEL-2HR columns using chloroform as an eluent. High-resolution mass spectra (HRMS) were conducted on Thermo Fisher Scientific ExactivePlus (ESI and DART). Chiral high performance liquid chromatography (HPLC) was performed using SHIMADZU Prominence-i LC-2030C Plus<sup>®</sup> equipped with DAICEL Chiralcel<sup>®</sup> and Chiralpak<sup>®</sup>. Details of chromatographic conditions on the separation of the products are described with compound data. Nuclear magnetic resonance (NMR) spectra were recorded on JEOL JNM-ECS-400 and JNM-ECZ-400S (<sup>1</sup>H 400 MHz, <sup>13</sup>C 101 MHz, <sup>19</sup>F 376 MHz) spectrometers. Chemical shifts for <sup>1</sup>H NMR are expressed in parts per million (ppm) relative to tetramethylsilane (δ 0.00 ppm) or acetonitrile-*d*<sub>3</sub> (δ 1.94 ppm). Chemical shifts for <sup>13</sup>C NMR are expressed in ppm relative to CDCl<sub>3</sub> (δ 77.0 ppm) or acetonitrile-*d*<sub>3</sub> (δ 1.32 ppm). Chemical shifts for <sup>19</sup>F NMR are expressed in ppm relative to PhF (δ – 113.15 ppm). Data are reported as follows: chemical shift, multiplicity (s = singlet, d = doublet, dd = doublet of doublets, ddd = doublet of doublets of doublets, dt = doublet of triplets, t = triplet, td = triplet of doublets, q = quartet, m = multiplet, brs = broad singlet), coupling constant (Hz), and integration.

## 2. Preparation of Pyrazolo[1,5-*a*]pyridines **1**

### 2-1. Synthesis of **1D** and **1G**

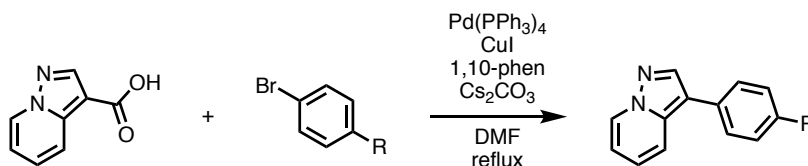

A round-bottom flask containing a magnetic stirring bar and cesium carbonate (244 mg, 0.750 mmol, 1.5 equiv) was dried with a heat-gun *in vacuo* and filled with N<sub>2</sub> gas after cooling to room temperature. To this flask were added Pd(PPh<sub>3</sub>)<sub>4</sub> (28.9 mg, 25.0 μmol, 5.0 mol%), copper iodide (9.5 mg, 50.0 μmol, 10 mol%), 1,10-phenanthroline (9.5 mg, 50.0 μmol, 10 mol%), and pyrazolo[1,5-*a*]pyridine-3-carboxylic acid (**1L**: 81.1 mg, 0.500 mmol, 1.0 equiv). The flask was placed under vacuum and refilled with N<sub>2</sub> gas three times. To this flask were added aryl bromide (0.750 mmol, 1.5 equiv) and DMF (2.5 mL). The mixture was heated under reflux and stirred for several hours. After cooling the reaction mixture to room temperature, the mixture was passed through a short silica-gel pad with EtOAc as an eluent, and then concentrated *in vacuo*. The residue was purified by Isolera<sup>®</sup> to afford the corresponding 3-arylpyrazolo[1,5-*a*]pyridine **1**.

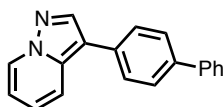

#### 3-([1,1'-Biphenyl]-4-yl)pyrazolo[1,5-*a*]pyridine (**1D**)

Purification by Isolera<sup>®</sup> (hexane/EtOAc = 9:1 to 1:1) afforded **1D** (69.8 mg, 52% yield) as a white solid. <sup>1</sup>H NMR (400 MHz, CDCl<sub>3</sub>) δ 8.52 (d, *J* = 7.2 Hz, 1H), 8.20 (s, 1H), 7.88 (d, *J* = 9.2 Hz, 1H), 7.72–7.62 (m, 6H), 7.47 (t, *J* = 7.6 Hz, 2H), 7.37 (t, *J* = 7.6 Hz, 1H), 7.21 (dd, *J* = 9.2, 6.8 Hz, 1H), 6.82 (t, *J* = 7.6 Hz, 1H); <sup>13</sup>C NMR (101 MHz, CDCl<sub>3</sub>) δ 140.7, 140.4, 138.9, 136.9, 132.1, 129.0, 128.8, 127.6, 127.23, 127.18, 126.9, 124.0, 117.5, 112.4, 112.0; HRMS (ESI) *m/z* calcd for C<sub>19</sub>H<sub>15</sub>N<sub>2</sub> [M+H]<sup>+</sup>: 271.1230 found 271.1227.

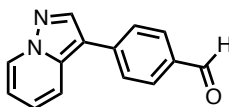

#### 4-(Pyrazolo[1,5-*a*]pyridin-3-yl)benzaldehyde (**1G**)

Purification by Isolera<sup>®</sup> (hexane/EtOAc = 9:1 to 1:1) afforded **1G** (61.1 mg, 55% yield) as a yellow solid. <sup>1</sup>H NMR (400 MHz, CDCl<sub>3</sub>) δ 10.0 (s, 1H), 8.54 (d, *J* = 6.8 Hz, 1H), 8.25 (s, 1H), 7.97 (d, *J* = 8.0 Hz, 2H), 7.90 (d, *J* = 8.8 Hz, 1H), 7.78 (d, *J* = 8.0 Hz, 2H), 7.29 (ddd, *J* = 8.8, 6.8, 0.8 Hz, 1H), 6.88 (td, *J* = 6.8, 0.8 Hz, 1H); <sup>13</sup>C NMR (101 MHz, CDCl<sub>3</sub>) δ 191.5, 140.9, 139.6, 137.2, 133.9, 130.5, 129.3, 126.7, 125.2, 117.3, 112.6, 111.5; HRMS (ESI) *m/z* calcd for C<sub>14</sub>H<sub>11</sub>N<sub>2</sub>O [M+H]<sup>+</sup>: 223.0866 found 223.0865.

## 2-2. Synthesis of 1H, 1I, and 1K

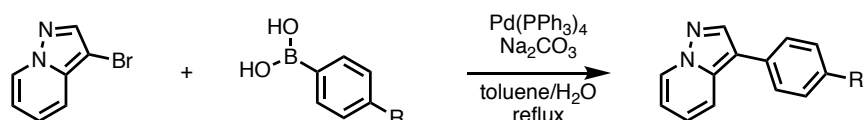

A round-bottom flask containing a magnetic stirring bar was dried with a heat-gun *in vacuo* and filled with N<sub>2</sub> gas after cooling to room temperature. To this flask were added Pd(PPh<sub>3</sub>)<sub>4</sub> (10 mol%), 3-bromopyrazolo[1,5-*a*]pyridine<sup>[7]</sup> (1.0 equiv), and arylboronic acid (1.5 equiv). The flask was placed under vacuum and refilled with N<sub>2</sub> gas three times. To the flask were added degassed 1.0 M Na<sub>2</sub>CO<sub>3</sub> aq. (3.0 equiv), and toluene (0.13 M) under stream of N<sub>2</sub> gas. The mixture was heated at 130 °C and stirred for several hours. After cooling the reaction mixture to room temperature, the reaction was quenched with H<sub>2</sub>O. The mixture was extracted with Et<sub>2</sub>O. The combined organic layer was dried over MgSO<sub>4</sub>, filtered, and concentrated *in vacuo*. The residue was purified by Isolera<sup>®</sup> to afford the corresponding 3-arylpyrazolo[1,5-*a*]pyridine **1**.

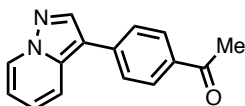

### 1-(4-(Pyrazolo[1,5-*a*]pyridin-3-yl)phenyl)ethan-1-one (1H)

Purification by Isolera<sup>®</sup> (hexane/EtOAc = 9:1 to 4:1) afforded **1H** (47.9 mg, 25% yield, 0.800 mmol scale) as a yellow solid. <sup>1</sup>H NMR (400 MHz, CDCl<sub>3</sub>) δ 8.53 (d, *J* = 7.2 Hz, 1H), 8.23 (s, 1H), 8.05 (dt, *J* = 8.8, 1.6 Hz, 2H), 7.87 (dt, *J* = 8.8, 1.2 Hz, 1H), 7.70 (d, *J* = 8.0 Hz, 2H), 7.26 (td, *J* = 8.8, 1.2 Hz, 1H), 6.86 (td, *J* = 7.2, 0.8 Hz, 1H), 2.64 (s, 3H); <sup>13</sup>C NMR (101 MHz, CDCl<sub>3</sub>) δ 197.3, 140.7, 138.1, 137.1, 134.5, 129.2, 129.1, 126.3, 124.9, 117.3, 112.4, 111.6, 26.5; HRMS (ESI) *m/z* calcd for C<sub>15</sub>H<sub>13</sub>N<sub>2</sub>O [M+H]<sup>+</sup>: 237.1022 found 237.1021.

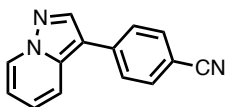

### 4-(Pyrazolo[1,5-*a*]pyridin-3-yl)benzotrile (1I)<sup>[8]</sup>

Purification by Isolera<sup>®</sup> (hexane/EtOAc = 9:1 to 1:1) to afford **1I** (129 mg, 59% yield, 1.00 mmol scale) as a yellow solid. The spectra were in accordance with those of the compounds reported in the literature.

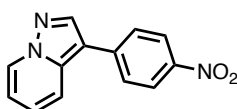

### 3-(4-Nitrophenyl)pyrazolo[1,5-*a*]pyridine (1K)

Purification by Isolera<sup>®</sup> (hexane/EtOAc = 9:1 to 1:1) afforded **1K** (55.5 mg, 29% yield, 0.800 mmol scale) as a yellow solid. <sup>1</sup>H NMR (400 MHz, CDCl<sub>3</sub>) δ 8.56 (d, *J* = 6.8 Hz, 1H), 8.32 (d, *J* = 8.8 Hz,

2H), 8.25 (s, 1H), 7.88 (d,  $J = 9.2$  Hz, 1H), 7.76 (d,  $J = 8.8$  Hz, 2H), 7.36–7.29 (m, 1H), 6.91 (t,  $J = 6.8$  Hz, 1H);  $^{13}\text{C}$  NMR (101 MHz,  $\text{CDCl}_3$ )  $\delta$  145.6, 141.1, 140.2, 137.3, 129.6, 126.6, 125.7, 124.6, 117.2, 112.9, 110.7; HRMS (ESI)  $m/z$  calcd for  $\text{C}_{13}\text{H}_{10}\text{N}_3\text{O}_2$   $[\text{M}+\text{H}]^+$ : 240.0768 found 240.0767.

### 2-3. Synthesis of 1M and 1N

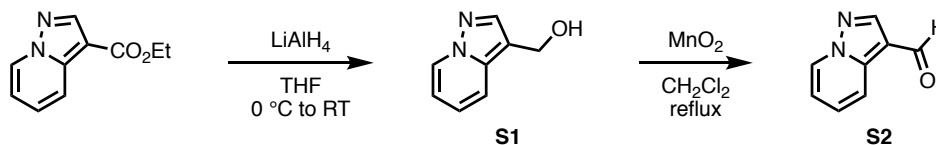

To a solution of **1F**<sup>[4]</sup> (965 mg, 5.10 mmol, 1.0 equiv) in THF (50 mL) was added lithium aluminum hydride ( $\text{LiAlH}_4$ : 212 mg, 5.58 mmol, 1.1 equiv) at 0 °C. After consumption of the starting material, the reaction was quenched with  $\text{H}_2\text{O}$  (0.30 mL), 3.0 M  $\text{NaOH}$  aq. (0.30 mL), and  $\text{H}_2\text{O}$  (0.90 mL). The precipitates were removed by filtration with Celite<sup>®</sup>. The filtrate was concentrated *in vacuo*. The residue was purified by Isolera<sup>®</sup> (hexane/ $\text{EtOAc}$  = 4:1 to 1:1) to afford pyrazolo[1,5-*a*]pyridin-3-ylmethanol (**S1**: 752 mg, quant.) as a yellow oil.

To a solution of **S1** (889 mg, 6.00 mmol, 1.0 equiv) in  $\text{CH}_2\text{Cl}_2$  (24 mL) was added  $\text{MnO}_2$  (5.22 g, 60.0 mmol, 10 equiv). The mixture was stirred with refluxing for 2 h. After cooling the reaction mixture to room temperature, the mixture was passed through a pad of Celite<sup>®</sup> with  $\text{EtOAc}$  as an eluent. The filtrate was concentrated *in vacuo*. The residue was purified by Isolera<sup>®</sup> (hexane/ $\text{EtOAc}$  = 9:1 to 4:1) to afford pyrazolo[1,5-*a*]pyridine-3-carbaldehyde (**S2**: 744 mg, 85% yield) as a white solid. The spectra were in accordance with those of the compounds reported in the literature.<sup>[9]</sup>

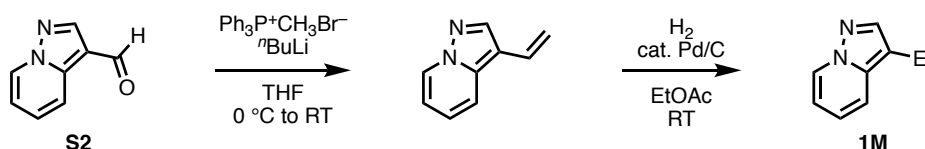

A two-necked flask containing a magnetic stirring bar was dried with a heat-gun *in vacuo* and filled with  $\text{N}_2$  gas after cooling to room temperature. To this flask were added methyltriphenylphosphonium bromide (1.18 g, 3.30 mmol, 1.1 equiv) and THF (10 mL). The mixture was cooled to 0 °C and then *n*-butyllithium (1.57 M in hexane, 2.10 mL, 3.30 mmol, 1.1 equiv) was slowly added. After stirring at 0 °C for 15 min, **S2** (438 mg, 3.00 mmol, 1.0 equiv) was added. The mixture was further stirred at room temperature for 12 h. The reaction was quenched with  $\text{NH}_4\text{Cl}$  aq. The mixture was extracted with  $\text{EtOAc}$  and washed with brine. The combined organic layer was dried over  $\text{Na}_2\text{SO}_4$ , filtered, and concentrated *in vacuo*. The residue was purified by Isolera<sup>®</sup> (hexane/ $\text{EtOAc}$  = 19:1 to 15:1) to afford 3-vinylpyrazolo[1,5-*a*]pyridine (300 mg, 69% yield) as a yellow oil.

To a solution of 3-vinylpyrazolo[1,5-*a*]pyridine (300 mg, 2.08 mmol, 1.0 equiv) in  $\text{EtOAc}$  (20 mL) was added  $\text{Pd/C}$  (15.1 mg, 5 wt%). The flask was subjected to  $\text{H}_2$  gas with a balloon (1 atm), then the mixture was stirred overnight at room temperature. The mixture was passed through a pad of Celite<sup>®</sup>.

The filtrate was concentrated *in vacuo*, and purified by Isolera<sup>®</sup> (hexane/EtOAc = 19:1 to 15:1) to afford 3-ethylpyrazolo[1,5-*a*]pyridine (**1M**: 267 mg, 88% yield) as a colorless oil. <sup>1</sup>H NMR (400 MHz, CDCl<sub>3</sub>) δ 8.40 (d, *J* = 7.6 Hz, 1H), 7.80 (s, 1H), 7.45 (dt, *J* = 8.8, 1.2 Hz, 1H), 7.03 (ddd, *J* = 8.8, 7.6, 1.2 Hz, 1H), 6.69 (td, *J* = 7.6, 1.2 Hz, 1H), 2.75 (q, *J* = 7.6 Hz, 2H), 1.31 (t, *J* = 7.6 Hz, 3H); <sup>13</sup>C NMR (101 MHz, CDCl<sub>3</sub>) δ 140.2, 137.6, 128.5, 121.7, 116.7, 113.0, 111.1, 16.7, 15.0; HRMS (ESI) *m/z* calcd for C<sub>9</sub>H<sub>11</sub>N<sub>2</sub> [M+H]<sup>+</sup>: 147.0917 found 147.0916.

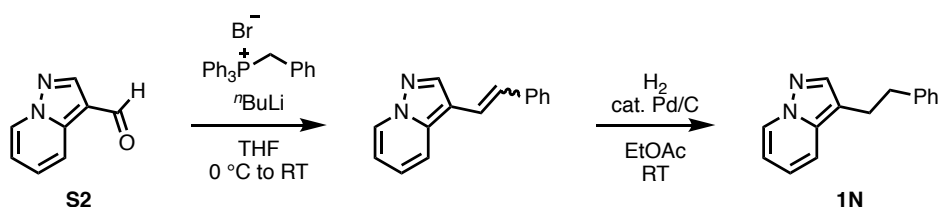

A two-necked flask containing a magnetic stirring bar was dried with a heat-gun *in vacuo* and filled with N<sub>2</sub> gas after cooling to room temperature. To this flask were added benzyltriphenylphosphonium bromide (953 mg, 2.20 mmol, 1.1 equiv) and THF (6.7 mL). The mixture was cooled to 0 °C and then *n*-butyllithium (1.57 M in hexane, 1.40 mL, 2.20 mmol, 1.1 equiv) was slowly added. After stirring at 0 °C for 15 min, **S2** (292 mg, 2.00 mmol, 1.0 equiv) was added. The mixture was further stirred at room temperature for 12 h. The reaction was quenched with NH<sub>4</sub>Cl aq. The mixture was extracted with EtOAc and washed with brine. The combined organic layer was dried over Na<sub>2</sub>SO<sub>4</sub>, filtered, and concentrated *in vacuo*. The residue was purified by Isolera<sup>®</sup> (hexane/EtOAc = 19:1 to 15:1) to afford (*E*)-3-styrylpyrazolo[1,5-*a*]pyridine (174 mg, 40% yield) as a colorless oil and (*Z*)-3-styrylpyrazolo[1,5-*a*]pyridine (193 mg, 44% yield) as a colorless oil.

To a solution of (*E*)-3-styrylpyrazolo[1,5-*a*]pyridine (174 mg, 0.790 mmol, 1.0 equiv) in EtOAc (7.9 mL) was added Pd/C (8.70 mg, 5 wt%). The flask was subjected to H<sub>2</sub> gas with a balloon (1 atm). After stirred overnight at room temperature, the mixture was passed through a pad of Celite<sup>®</sup>. The filtrate was concentrated *in vacuo*, and purified by Isolera<sup>®</sup> (hexane/EtOAc = 19:1 to 15:1) to afford 3-phenethylpyrazolo[1,5-*a*]pyridine (**1N**: 146 mg, 84% yield) as a yellow oil. <sup>1</sup>H NMR (400 MHz, CDCl<sub>3</sub>) δ 8.39 (d, *J* = 6.8 Hz, 1H), 7.74 (s, 1H), 7.31–7.24 (m, 3H), 7.23–7.15 (m, 3H), 7.02–6.96 (m, 1H), 6.68 (td, *J* = 6.8, 0.8 Hz, 1H), 3.07–3.00 (m, 2H), 2.99–2.92 (m, 2H); <sup>13</sup>C NMR (101 MHz, CDCl<sub>3</sub>) δ 141.6, 140.9, 138.0, 128.5, 128.3, 126.0, 121.9, 116.6, 111.2, 110.4, 37.1, 25.6 (one peak is missing due to overlapping); HRMS (ESI) *m/z* calcd for C<sub>15</sub>H<sub>15</sub>N<sub>2</sub> [M+H]<sup>+</sup>: 223.1230 found 223.1228.

## 2-4. Synthesis of 10

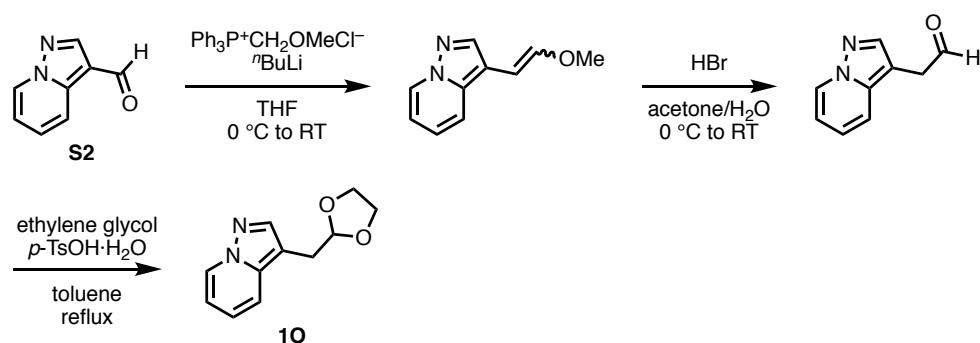

A two-necked flask containing a magnetic stirring bar was dried with a heat-gun *in vacuo* and filled with N<sub>2</sub> gas after cooling to room temperature. To this flask were added (methoxymethyl)triphenylphosphonium chloride (1.22 g, 3.57 mmol, 1.1 equiv) and THF (12 mL). The mixture was cooled to 0 °C and then *n*-butyllithium (1.57 M in hexane, 2.30 mL, 3.57 mmol, 1.1 equiv) was slowly added. After stirring the mixture at 0 °C for 15 min, **S2** (475.0 mg, 3.25 mmol, 1.0 equiv) was added. After stirring at room temperature for 12 h, the reaction was quenched with NH<sub>4</sub>Cl aq. The mixture was extracted with EtOAc and washed with brine. The combined organic layer was dried over Na<sub>2</sub>SO<sub>4</sub>, filtered, and concentrated *in vacuo*. The crude material was used for the next step without further purification.

To a round-bottom flask containing the crude material in acetone (5.0 mL) was added HBr aq. (3.0 mL) slowly at 0 °C. The mixture was stirred at room temperature for 18 h. The reaction was quenched with NaHCO<sub>3</sub> aq. The mixture was extracted with EtOAc and washed with brine. The combined organic layer was dried over Na<sub>2</sub>SO<sub>4</sub>, filtered, and concentrated *in vacuo*. The residue was purified by Isolera<sup>®</sup> (hexane/EtOAc = 3:1 to 1:1) to afford 2-(pyrazolo[1,5-*a*]pyridin-3-yl)acetaldehyde (102 mg, 21% yield over two steps) as a white solid.

To a round-bottom flask containing 2-(pyrazolo[1,5-*a*]pyridin-3-yl)acetaldehyde (109 mg, 0.686 mmol, 1.0 equiv) were added *p*-toluenesulfonic acid monohydrate (6.50 mg, 34.0 μmol, 5.0 mol%), ethylene glycol (1.10 mL, 20.4 mmol, 30 equiv), and toluene (2.3 mL). The reaction mixture was stirred with refluxing for 5 h. After cooled to room temperature, the reaction was quenched with NaHCO<sub>3</sub> aq. The mixture was extracted with EtOAc and washed with brine. The combined organic layer was dried over Na<sub>2</sub>SO<sub>4</sub>, filtered, and concentrated *in vacuo*. The residue was purified by Isolera<sup>®</sup> (hexane/EtOAc = 3:1 to 1:1) to afford 3-((1,3-dioxolan-2-yl)methyl)pyrazolo[1,5-*a*]pyridine (**10**: 88.2 mg, 63% yield) as a yellow oil. <sup>1</sup>H NMR (400 MHz, CDCl<sub>3</sub>) δ 8.41 (d, *J* = 7.2 Hz, 1H), 7.88 (s, 1H), 7.56 (d, *J* = 9.2 Hz, 1H), 7.07 (ddd, *J* = 9.2, 6.8, 1.2 Hz, 1H), 6.71 (td, *J* = 6.8, 1.2 Hz, 1H), 5.09 (t, *J* = 4.8 Hz, 1H), 3.97–3.81 (m, 4H), 3.09 (d, *J* = 4.8 Hz, 2H); <sup>13</sup>C NMR (101 MHz, CDCl<sub>3</sub>) δ 142.1, 138.9, 128.4, 122.3, 117.1, 111.3, 104.6, 104.1, 65.0, 28.9; HRMS (ESI) *m/z* calcd for C<sub>11</sub>H<sub>13</sub>N<sub>2</sub>O<sub>2</sub> [M+H]<sup>+</sup>: 205.0972 found 205.0971.

## 2-5. Synthesis of 1P

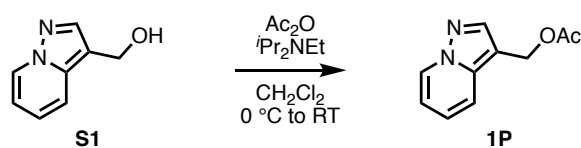

To a solution of **S1** (190 mg, 1.28 mmol, 1.0 equiv) in  $\text{CH}_2\text{Cl}_2$  (6.4 mL) were added to acetic anhydride (130  $\mu\text{L}$ , 1.41 mmol, 1.1 equiv) and *N,N*-diisopropylethylamine (268  $\mu\text{L}$ , 1.54 mmol, 1.2 equiv) at 0 °C. The mixture was stirred at room temperature for 3 h. The reaction was quenched with  $\text{H}_2\text{O}$ . The mixture was extracted with EtOAc and washed with brine. The combined organic layer was dried over  $\text{Na}_2\text{SO}_4$ , filtered, and concentrated *in vacuo*. Purification by Isolera<sup>®</sup> (hexane/EtOAc = 19:1 to 9:1) afforded pyrazolo[1,5-*a*]pyridin-3-ylmethyl acetate (**1P**: 144 mg, 59% yield) as a colorless oil.  $^1\text{H}$  NMR (400 MHz,  $\text{CDCl}_3$ )  $\delta$  8.46 (d,  $J = 7.2$  Hz, 1H), 8.00 (s, 1H), 7.67 (d,  $J = 8.8$  Hz, 1H), 7.19 (ddd,  $J = 8.8, 7.2, 1.2$  Hz, 1H), 6.80 (td,  $J = 7.2, 1.2$  Hz, 1H), 5.30 (s, 2H), 2.05 (s, 3H);  $^{13}\text{C}$  NMR (101 MHz,  $\text{CDCl}_3$ )  $\delta$  171.1, 142.8, 139.3, 128.7, 123.9, 116.8, 112.1, 105.8, 56.5, 21.0; HRMS (ESI)  $m/z$  calcd for  $\text{C}_{10}\text{H}_{11}\text{N}_2\text{O}_2$   $[\text{M}+\text{H}]^+$ : 191.0815 found 191.0814.

## 2-6. Synthesis of 1R

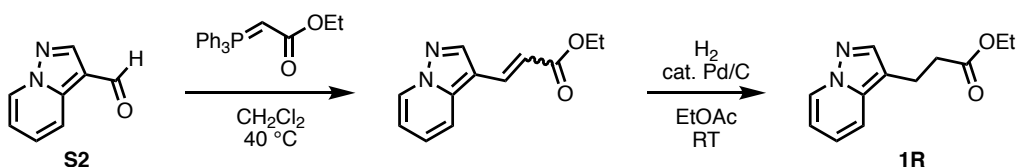

To a solution of **S2** (496 mg, 3.39 mmol, 1.0 equiv) in  $\text{CH}_2\text{Cl}_2$  (11.3 mL) was added (carboxymethylene)triphenylphosphorane (2.36 g, 6.78 mmol, 2.0 equiv). The mixture was stirred at 40 °C for 12 h. After completion of the reaction, the solvent was removed under reduced pressure. The residue was purified by Isolera<sup>®</sup> (hexane/EtOAc = 19:1 to 9:1) to afford ethyl 3-(pyrazolo[1,5-*a*]pyridin-3-yl)acrylate (699 mg, 95% yield) as a white solid.

To a solution of ethyl 3-(pyrazolo[1,5-*a*]pyridin-3-yl)acrylate (659 mg, 3.05 mmol, 1.0 equiv) in EtOAc (15 mL) was added Pd/C (32.5 mg, 5 wt%). The flask was subjected to  $\text{H}_2$  gas with a balloon (1 atm). After stirred for 16 h at room temperature, the mixture was passed through a pad of Celite<sup>®</sup>. The filtrate was concentrated *in vacuo*, and purified by Isolera<sup>®</sup> (hexane/EtOAc = 19:1 to 15:1) to afford ethyl 3-(pyrazolo[1,5-*a*]pyridin-3-yl)propanoate (**1R**: 462 mg, 69% yield) as a colorless oil.  $^1\text{H}$  NMR (400 MHz,  $\text{CDCl}_3$ )  $\delta$  8.40 (d,  $J = 6.8$  Hz, 1H), 7.80 (s, 1H), 7.49 (d,  $J = 9.2$  Hz, 1H), 7.06 (ddd,  $J = 9.2, 6.8, 1.2$  Hz, 1H), 6.71 (td,  $J = 6.8, 1.2$  Hz, 1H), 4.12 (q,  $J = 7.2$  Hz, 2H), 3.07 (t,  $J = 7.6$  Hz, 2H), 2.66 (t,  $J = 7.6$  Hz, 2H), 1.22 (t,  $J = 7.2$  Hz, 3H);  $^{13}\text{C}$  NMR (101 MHz,  $\text{CDCl}_3$ )  $\delta$  172.8, 140.7, 137.9, 128.5, 122.2, 116.6, 111.3, 109.3, 60.3, 35.3, 18.8, 14.1; HRMS (ESI)  $m/z$  calcd for  $\text{C}_{12}\text{H}_{14}\text{N}_2\text{O}_2\text{Na}$   $[\text{M}+\text{Na}]^+$ : 241.0948 found 241.0947.



## 2-7. Synthesis of 1T–1W

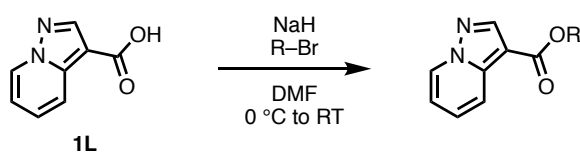

To a solution of **1L** (81.1 mg, 0.500 mmol, 1.0 equiv) in DMF (2.0 mL) was added sodium hydride (60% oil dispersion; 30.0 mg, 0.750 mmol, 1.5 equiv) at 0 °C. The mixture was stirred for 30 min at 0 °C and then alkyl bromide (0.750 mmol, 1.5 equiv) was added. The mixture was stirred for several hours at room temperature with monitoring the reaction progress by TLC. The reaction was quenched with NH<sub>4</sub>Cl aq. at 0 °C. The mixture was extracted with EtOAc and washed with brine. The combined organic layer was dried over Na<sub>2</sub>SO<sub>4</sub>, filtered, and concentrated *in vacuo*. The residue was purified by Isolera<sup>®</sup> to afford the corresponding alkyl pyrazolo[1,5-*a*]pyridine-3-carboxylate **1**.

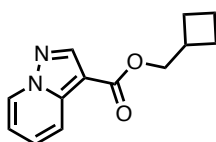

### Cyclobutylmethyl pyrazolo[1,5-*a*]pyridine-3-carboxylate (**1T**)

Purification by Isolera<sup>®</sup> (hexane/EtOAc = 19:1 to 4:1) afforded **1T** (67.0 mg, 58% yield) as a colorless oil. <sup>1</sup>H NMR (400 MHz, CDCl<sub>3</sub>) δ 8.53 (d, *J* = 6.8 Hz, 1H), 8.41 (s, 1H), 8.14 (d, *J* = 9.2 Hz, 1H), 7.40 (ddd, *J* = 9.2, 6.8, 1.2 Hz, 1H), 6.94 (td, *J* = 6.8, 1.2 Hz, 1H), 4.31 (d, *J* = 7.2 Hz, 2H), 2.86–2.72 (m, 1H), 2.23–2.07 (m, 2H), 2.85–1.84 (m, 4H); <sup>13</sup>C NMR (101 MHz, CDCl<sub>3</sub>) δ 163.5, 144.8, 140.7, 129.2, 127.2, 119.0, 113.6, 103.9, 67.7, 34.3, 24.8, 18.4; HRMS (ESI) *m/z* calcd for C<sub>13</sub>H<sub>15</sub>N<sub>2</sub>O<sub>2</sub> [M+H]<sup>+</sup>: 231.1128 found 231.1127.

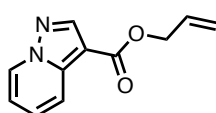

### Allyl pyrazolo[1,5-*a*]pyridine-3-carboxylate (**1U**)

Purification by Isolera<sup>®</sup> (hexane/EtOAc = 19:1 to 9:1) afforded **1U** (65.7 mg, 65% yield) as a colorless oil. <sup>1</sup>H NMR (400 MHz, CDCl<sub>3</sub>) δ 8.54 (d, *J* = 6.8 Hz, 1H), 8.43 (s, 1H), 8.18 (d, *J* = 9.2 Hz, 1H), 7.42 (ddd, *J* = 9.2, 6.8, 1.2 Hz, 1H), 6.96 (td, *J* = 6.8, 1.2 Hz, 1H), 6.13–6.01 (m, 1H), 5.49–5.38 (m, 1H), 5.34–5.26 (m, 1H), 4.85 (dt, *J* = 5.2, 1.6 Hz, 2H); <sup>13</sup>C NMR (101 MHz, CDCl<sub>3</sub>) δ 163.0, 144.9, 140.9, 132.6, 129.3, 127.4, 119.1, 118.0, 113.7, 103.5, 64.6; HRMS (ESI) *m/z* calcd for C<sub>11</sub>H<sub>11</sub>N<sub>2</sub>O<sub>2</sub> [M+H]<sup>+</sup>: 203.0815 found 203.0815.

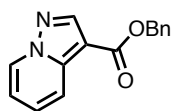

### Benzyl pyrazolo[1,5-*a*]pyridine-3-carboxylate (**1V**)

Purification by Isolera<sup>®</sup> (hexane/EtOAc = 19:1 to 4:1) afforded **1V** (82.0 mg, 65% yield) as a yellow oil. <sup>1</sup>H NMR (400 MHz, CDCl<sub>3</sub>) δ 8.51 (d, *J* = 7.2 Hz, 1H), 8.43 (s, 1H), 8.14 (d, *J* = 8.4 Hz, 1H), 7.47 (d, *J* = 7.2 Hz, 2H), 7.42–7.31 (m, 4H), 6.93 (td, *J* = 6.8, 0.8 Hz, 1H), 5.38 (s, 2H); <sup>13</sup>C NMR (101 MHz, CDCl<sub>3</sub>) δ 163.1, 144.9, 140.9, 136.4, 129.3, 128.5, 128.1, 127.4, 119.0, 113.7, 103.5, 65.7 (one peak is missing due to overlapping); HRMS (ESI) *m/z* calcd for C<sub>15</sub>H<sub>13</sub>N<sub>2</sub>O<sub>2</sub> [M+H]<sup>+</sup>: 253.0972 found 253.0970.

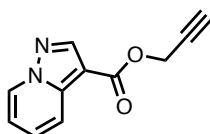

### Prop-2-yn-1-yl pyrazolo[1,5-*a*]pyridine-3-carboxylate (**1W**)

Purification by Isolera<sup>®</sup> (hexane/EtOAc = 19:1 to 4:1) afforded **1W** (80.2 mg, 64% yield) as a white solid. <sup>1</sup>H NMR (400 MHz, CDCl<sub>3</sub>) δ 8.55 (d, *J* = 6.8 Hz, 1H), 8.44 (s, 1H), 8.19 (d, *J* = 8.8 Hz, 1H), 7.45 (ddd, *J* = 8.8, 6.8, 0.8 Hz, 1H), 6.93 (td, *J* = 6.8, 0.8 Hz, 1H), 4.94 (d, *J* = 2.4 Hz, 2H), 2.52 (t, *J* = 2.4 Hz, 1H); <sup>13</sup>C NMR (101 MHz, CDCl<sub>3</sub>) δ 162.3, 145.0, 141.0, 129.4, 127.7, 119.0, 113.9, 102.7, 78.1, 74.7, 51.5; HRMS (ESI) *m/z* calcd for C<sub>11</sub>H<sub>9</sub>N<sub>2</sub>O<sub>2</sub> [M+H]<sup>+</sup>: 201.0659 found 201.0658.

## 2-8. Synthesis of **1X**

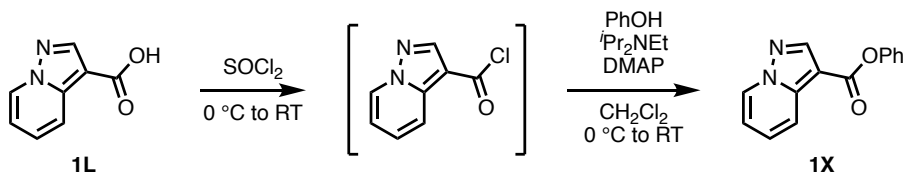

To a round-bottom flask with **1L** (162 mg, 1.00 mmol, 1.0 equiv) was added thionyl chloride (2.40 mL, 4.00 mmol, 4.0 equiv). After the mixture was stirred at room temperature for 1 h, the solution was concentrated *in vacuo*. To the resulting mixture were added *N,N*-dimethylaminopyridine (DMAP: 11.0 mg, 50.0 μmol, 5.0 mol%), phenol (104 mg, 1.10 mmol, 1.1 equiv), CH<sub>2</sub>Cl<sub>2</sub> (4.0 mL), and then *N,N*-diisopropylethylamine (210 μL, 1.20 mmol, 1.2 equiv) slowly at 0 °C. The mixture was stirred for 12 h. After the reaction was quenched with NaHCO<sub>3</sub> aq., the mixture was extracted with CH<sub>2</sub>Cl<sub>2</sub>. The combined organic layer was dried over Na<sub>2</sub>SO<sub>4</sub>, filtered, and concentrated *in vacuo*. The residue was purified by Isolera<sup>®</sup> (hexane/EtOAc = 19:1 to 9:1) to afford phenyl pyrazolo[1,5-*a*]pyridine-3-carboxylate (**1X**: 196 mg, 82% yield) as a white solid. <sup>1</sup>H NMR (400 MHz, CDCl<sub>3</sub>) δ 8.61–8.54 (m, 2H), 8.22 (d, *J* = 9.2 Hz, 1H), 7.49–7.39 (m, 3H), 7.30–7.22 (m, 3H), 7.00 (t, *J* = 6.8 Hz, 1H); <sup>13</sup>C NMR (101 MHz, CDCl<sub>3</sub>) δ 161.6, 150.6, 145.3, 141.3, 129.43, 129.37, 127.9, 125.6, 121.9, 119.1, 114.0, 102.8; HRMS (ESI) *m/z* calcd for C<sub>14</sub>H<sub>11</sub>N<sub>2</sub>O<sub>2</sub> [M+H]<sup>+</sup>: 239.0815 found 239.0815.

## 2-9. Synthesis of 1Z

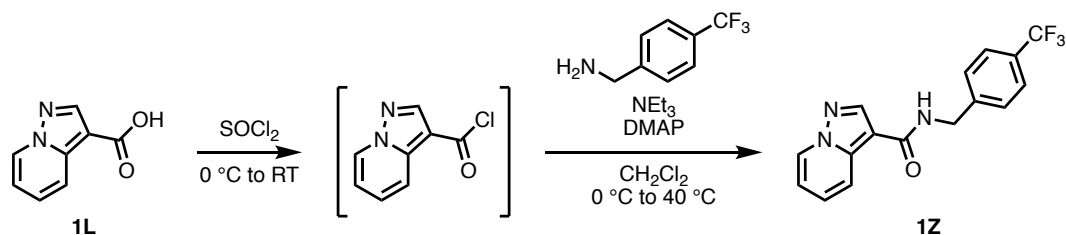

To a round-bottom flask containing a magnetic stirring bar and **1L** (361 mg, 2.00 mmol, 1.0 equiv) was added thionyl chloride (4.90 mL, 8.00 mmol, 4.0 equiv). After the mixture was stirred at room temperature for 1 h, the solution was concentrated *in vacuo*. To the resulting mixture were added *N,N*-dimethylaminopyridine (DMAP: 12.2 mg, 0.100 mmol, 5.0 mol%), 4-(trifluoromethyl)benzylamine (450  $\mu$ L, 3.00 mmol, 1.5 equiv),  $\text{CH}_2\text{Cl}_2$  (8.0 mL), and then triethylamine (340  $\mu$ L, 2.40 mmol, 1.2 equiv) slowly at 0  $^\circ\text{C}$ . The reaction mixture was stirred at 40  $^\circ\text{C}$  for 4 h. After the reaction was quenched with  $\text{NaHCO}_3$  aq., the mixture was extracted with  $\text{CH}_2\text{Cl}_2$ . The combined organic layer was dried over  $\text{Na}_2\text{SO}_4$ , filtered, and concentrated *in vacuo*. The residue was purified by Isolera<sup>®</sup> (hexane/EtOAc = 19:1 to 9:1) to afford *N*-(4-(trifluoromethyl)benzyl)pyrazolo[1,5-*a*]pyridine-3-carboxamide (**1Z**: 449 mg, 66% yield) as a white solid.  $^1\text{H}$  NMR (400 MHz,  $\text{CDCl}_3$ )  $\delta$  8.49 (d,  $J$  = 6.8 Hz, 1H), 8.32 (d,  $J$  = 8.8 Hz, 1H), 8.18 (s, 1H), 7.59 (d,  $J$  = 8.4 Hz, 2H), 7.48 (d,  $J$  = 8.4 Hz, 2H), 7.37 (dd,  $J$  = 8.8, 6.8 Hz, 1H), 6.94 (t,  $J$  = 6.8 Hz, 1H), 6.40 (brs, 1H), 4.71 (d,  $J$  = 6.0 Hz, 2H);  $^{13}\text{C}$  NMR (101 MHz,  $\text{CDCl}_3$ )  $\delta$  163.3, 142.8, 140.7, 140.4, 129.5 (q,  $J_{\text{C-F}}$  = 33.0 Hz), 128.9, 127.8, 126.7, 125.5 (q,  $J_{\text{C-F}}$  = 3.8 Hz), 124.0 (q,  $J_{\text{C-F}}$  = 273.5 Hz), 119.5, 113.8, 106.2, 42.8;  $^{19}\text{F}$  NMR (376 MHz,  $\text{CDCl}_3$ )  $\delta$  -62.5; HRMS (ESI)  $m/z$  calcd for  $\text{C}_{16}\text{H}_{13}\text{F}_3\text{N}_3\text{O}$   $[\text{M}+\text{H}]^+$ : 320.1005 found 320.1005.

## 2-10. Synthesis of Probenecid Derivative 1AA

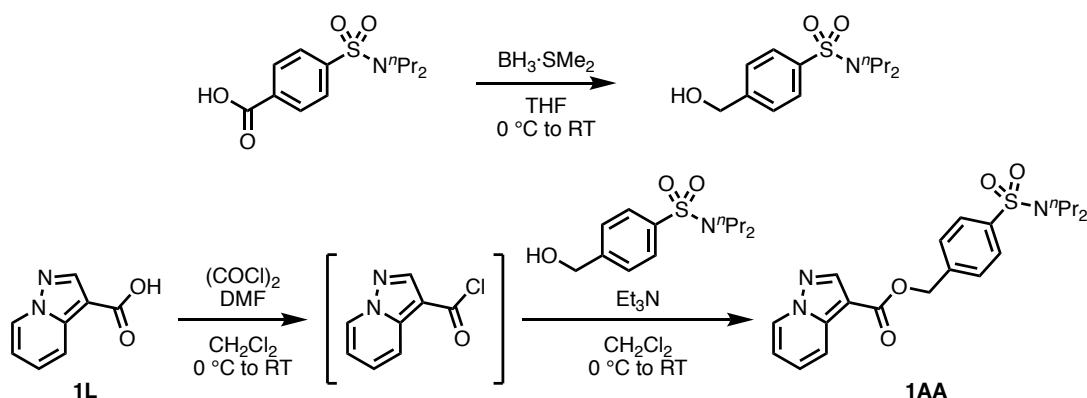

To a solution of probenecid (856 mg, 3.00 mmol, 1.0 equiv) in THF (30 mL) was added  $\text{BH}_3\cdot\text{SMe}_2$  (570  $\mu$ L, 6.00 mmol, 2.0 equiv) dropwise at 0  $^\circ\text{C}$ . The mixture was stirred at room temperature for 24 h. The reaction was quenched with MeOH carefully at 0  $^\circ\text{C}$ . Solvent was removed *in vacuo* and the

residue was purified by Isolera<sup>®</sup> (hexane/EtOAc = 4:1 to 1:1) to afford 4-(hydroxymethyl)-*N,N*-dipropylbenzenesulfonamide (814 mg, quant.) as a colorless oil.

To a solution of **1L** (81.1 mg, 0.500 mmol, 1.0 equiv) in CH<sub>2</sub>Cl<sub>2</sub> (5.0 mL) were added oxalyl chloride (52.0 μL, 0.600 mmol, 1.2 equiv) and one drop of DMF. After the mixture was stirred at room temperature for 1.5 h, the solution was concentrated *in vacuo*. To the resulting mixture were added 4-(hydroxymethyl)-*N,N*-dipropylbenzenesulfonamide (163 mg, 0.600 mmol, 1.2 equiv), CH<sub>2</sub>Cl<sub>2</sub> (5.0 mL), and then triethylamine (200 μL, 1.50 mmol, 3.0 equiv) slowly at 0 °C. The mixture was stirred at room temperature for 12 h. After the reaction was quenched with NaHCO<sub>3</sub> aq., the mixture was extracted with CH<sub>2</sub>Cl<sub>2</sub>. The combined organic layer was dried over Na<sub>2</sub>SO<sub>4</sub>, filtered, and concentrated *in vacuo*. The residue was purified by PTLC (toluene/EtOAc = 2:1) to afford 4-(*N,N*-dipropylsulfamoyl)benzyl pyrazolo[1,5-*a*]pyridine-3-carboxylate (**1AA**: 112 mg, 54% yield) as a white solid. <sup>1</sup>H NMR (400 MHz, CDCl<sub>3</sub>) δ 8.56 (dt, *J* = 6.8, 1.2 Hz, 1H), 8.45 (s, 1H), 8.15 (dd, *J* = 8.8, 1.2 Hz, 1H), 7.83 (d, *J* = 8.0 Hz, 2H), 7.58 (d, *J* = 8.0 Hz, 2H), 7.42 (ddd, *J* = 8.8, 6.8, 1.2 Hz, 1H), 6.99 (td, *J* = 6.8, 1.2 Hz, 1H), 5.44 (s, 2H), 3.11–3.05 (m, 4H), 1.62–1.51 (m, 4H), 0.88 (t, *J* = 7.2 Hz, 6H); <sup>13</sup>C NMR (101 MHz, CDCl<sub>3</sub>) δ 162.8, 144.9, 141.0, 140.9, 139.7, 129.4, 128.1, 127.7, 127.3, 118.9, 113.9, 103.0, 64.5, 50.1, 22.0, 11.1; HRMS (ESI) *m/z* calcd for C<sub>21</sub>H<sub>26</sub>N<sub>3</sub>O<sub>4</sub>S [M+H]<sup>+</sup>: 416.1639 found 416.1635.

## 2-11. Synthesis of Estrone Derivative 1AB

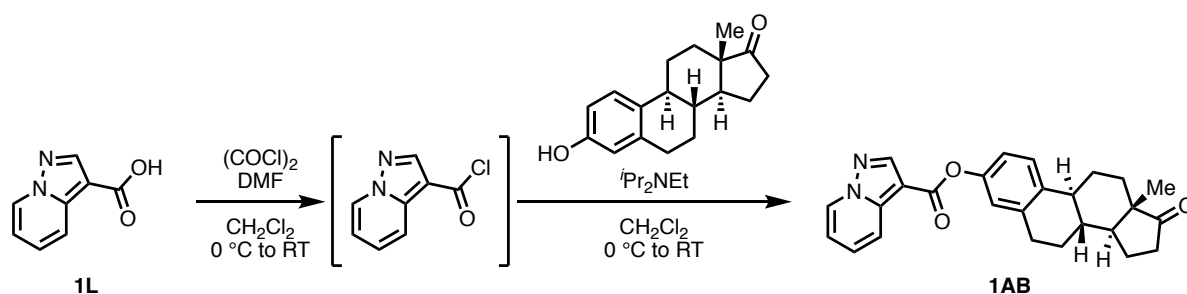

To a solution of **1L** (162 mg, 1.00 mmol, 1.0 equiv) in CH<sub>2</sub>Cl<sub>2</sub> (5.0 mL) were added oxalyl chloride (103 μL, 1.20 mmol, 1.2 equiv) and one drop of DMF. After the mixture was stirred at room temperature for 1.5 h, the solution was concentrated *in vacuo*. To the resulting mixture were added estrone (324 mg, 1.20 mmol, 1.2 equiv), CH<sub>2</sub>Cl<sub>2</sub> (5.0 mL), and then *N,N*-diisopropylethylamine (440 μL, 2.50 mmol, 2.5 equiv) slowly at 0 °C. The mixture was stirred at room temperature for 12 h. After the reaction was quenched with NaHCO<sub>3</sub> aq., the mixture was extracted with CH<sub>2</sub>Cl<sub>2</sub>. The combined organic layer was dried over Na<sub>2</sub>SO<sub>4</sub>, filtered, and concentrated *in vacuo*. The residue was purified by PTLC (hexane/EtOAc = 2:1) to afford (8*R*,9*S*,13*S*,14*S*)-13-methyl-17-oxo-7,8,9,11,12,13,14,15,16,17-decahydro-6*H*-cyclopenta[*a*]phenanthren-3-yl pyrazolo[1,5-*a*]pyridine-3-carboxylate (**1AB**: 281 mg, 68% yield) as a white solid. <sup>1</sup>H NMR (400 MHz, CDCl<sub>3</sub>) δ 8.59 (d, *J* = 6.8 Hz, 1H), 8.55 (s, 1H), 8.22 (d, *J* = 8.8 Hz, 1H), 7.47 (ddd, *J* = 8.8, 6.8, 1.2 Hz, 1H), 7.35 (d, *J* = 8.8 Hz, 1H), 7.05–6.96 (m, 3H), 2.95 (dd, *J* = 8.8, 4.4 Hz, 2H), 2.52 (dd, *J* = 18.8, 8.4 Hz, 1H), 2.48–2.40 (m, 1H), 2.38–2.28 (m, 1H),

2.22–2.15 (m, 4H), 1.71–1.42 (m, 6H), 0.93 (s, 3H); <sup>13</sup>C NMR (101 MHz, CDCl<sub>3</sub>) δ 220.7, 161.8, 148.4, 145.2, 141.3, 137.9, 137.2, 129.4, 127.8, 126.3, 121.9, 119.1, 114.0, 102.9, 50.3, 47.9, 44.1, 37.9, 35.8, 31.5, 29.6, 29.4, 26.3, 25.7, 21.5, 13.8; HRMS (ESI) *m/z* calcd for C<sub>26</sub>H<sub>27</sub>N<sub>2</sub>O<sub>3</sub> [M+H]<sup>+</sup>: 415.2016 found 415.2013.

## 2-12. Synthesis of 1AC–1AF

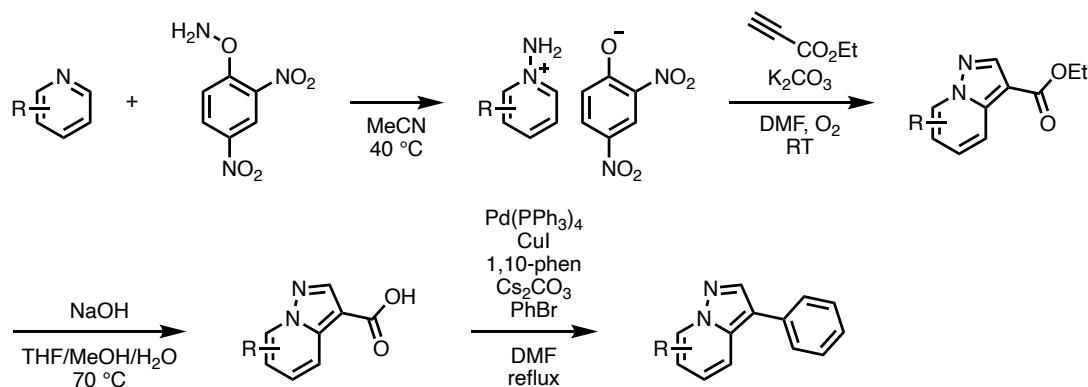

To a round-bottom flask containing a magnetic stirring bar were added methylpyridine (446 mg, 5.00 mmol, 1.0 equiv) and MeCN (4.0 mL). To this mixture was added *O*-(2,4-dinitrophenyl)hydroxylamine<sup>[10]</sup> (996 mg, 5.00 mmol, 1.0 equiv) in one portion. The mixture was stirred at 40 °C for 24 h. The solvent was removed under reduced pressure and the residue was triturated with Et<sub>2</sub>O. The resulting solid was filtered and dried *in vacuo*. The obtained solid containing *N*-aminopyridinium salt was used for the next step without further purification.

To a round-bottom flask containing a magnetic stirring bar were added a solution of the crude material in DMF (2.0 mL), potassium carbonate (967 mg, 7.00 mmol, 1.4 equiv) and ethyl propiolate (562 μL, 5.50 mmol, 1.1 equiv) at room temperature. Air was introduced to the reaction mixture by diaphragm pump. The reaction mixture was stirred for 24 h. The solvent was removed *in vacuo*. The mixture was extracted with Et<sub>2</sub>O and washed with brine. The combined organic layer was dried over MgSO<sub>4</sub>, filtered, and concentrated *in vacuo*. The residue was purified by Isolera<sup>®</sup> to afford the corresponding ethyl methylpyrazolo[1,5-*a*]pyridine-3-carboxylate.

To a round-bottom flask containing a magnetic stirring bar and ethyl methylpyrazolo[1,5-*a*]pyridine-3-carboxylate (1.0 equiv) were added THF (0.9 M), MeOH (0.9 M), H<sub>2</sub>O (0.9 M), and 6.0 M NaOH aq. (2.0 equiv) at room temperature. The reaction mixture was stirred at 70 °C. After completion of the reaction, the mixture was adjusted to pH = 7 with DOWEX<sup>®</sup> 50W. The mixture was filtered, washed with MeOH, and the filtrate was concentrated *in vacuo* to afford the corresponding methylpyrazolo[1,5-*a*]pyridine-3-carboxylic acid. The crude material was used for the next step without further purification.

A round-bottom flask containing a magnetic stirring bar and cesium carbonate (1.5 equiv) was dried with a heat-gun *in vacuo* and filled with N<sub>2</sub> gas after cooling to room temperature. To this flask were added Pd(PPh<sub>3</sub>)<sub>4</sub> (5.0 mol%), copper iodide (10 mol%), 1,10-phenanthroline (10 mol%), and

methylpyrazolo[1,5-*a*]pyridine-3-carboxylic acid (1.0 equiv). The flask was placed under vacuum and refilled with N<sub>2</sub> gas three times. To this flask were added bromobenzene (1.0 equiv) and DMF (0.2 M). The mixture was heated under reflux and stirred for several hours. After cooled to room temperature, the mixture was passed through a short silica-gel pad with EtOAc as an eluent, and then concentrated *in vacuo*. The residue was purified by Isolera<sup>®</sup> to afford the corresponding methyl-3-phenylpyrazolo[1,5-*a*]pyridine **1**.

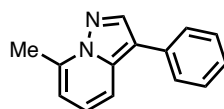

#### 7-Methyl-3-phenylpyrazolo[1,5-*a*]pyridine (**1AC**)

Purification by Isolera<sup>®</sup> (hexane/EtOAc = 49:1 to 19:1) afforded **1AC** (533 mg, 51% yield over 4 steps) as a colorless oil. <sup>1</sup>H NMR (400 MHz, CDCl<sub>3</sub>) δ 8.19 (s, 1H), 7.75 (d, *J* = 8.8 Hz, 1H), 7.61 (dd, *J* = 8.0, 1.2 Hz, 2H), 7.45 (t, *J* = 8.0 Hz, 2H), 7.29 (t, *J* = 7.6 Hz, 1H), 7.14 (dd, *J* = 8.8, 6.8 Hz, 1H), 6.67 (d, *J* = 6.8 Hz, 1H), 2.78 (s, 3H); <sup>13</sup>C NMR (101 MHz, CDCl<sub>3</sub>) δ 139.9, 138.5, 137.3, 133.5, 128.9, 127.1, 126.1, 124.0, 115.0, 113.1, 111.4, 17.9; HRMS (ESI) *m/z* calcd for C<sub>14</sub>H<sub>13</sub>N<sub>2</sub> [M+H]<sup>+</sup>: 209.1073 found 209.1072.

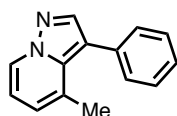

#### 4-Methyl-3-phenylpyrazolo[1,5-*a*]pyridine (**1AD**)

Purification by Isolera<sup>®</sup> (hexane/EtOAc = 49:1 to 19:1) afforded **1AD** (294 mg, 28% yield over 4 steps) as a colorless oil. <sup>1</sup>H NMR (400 MHz, CDCl<sub>3</sub>) δ 8.37 (d, *J* = 7.2 Hz, 1H), 7.89 (s, 1H), 7.41–7.34 (m, 5H), 6.84 (dt, *J* = 7.2, 1.2 Hz, 1H), 6.68 (t, *J* = 7.2 Hz, 1H), 2.21 (s, 3H); <sup>13</sup>C NMR (101 MHz, CDCl<sub>3</sub>) δ 142.0, 137.2, 134.1, 130.9, 128.8, 127.7, 126.8, 123.4, 114.3, 111.6, 19.8 (one peak is missing due to overlapping); HRMS (ESI) *m/z* calcd for C<sub>14</sub>H<sub>13</sub>N<sub>2</sub> [M+H]<sup>+</sup>: 209.1073 found 209.1072.

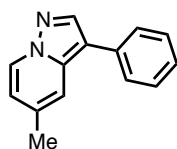

#### 5-Methyl-3-phenylpyrazolo[1,5-*a*]pyridine (**1AE**)

Purification by Isolera<sup>®</sup> (hexane/EtOAc = 49:1 to 19:1) afforded **1AE** (167 mg, 16% yield over 4 steps) as a colorless oil. <sup>1</sup>H NMR (400 MHz, CDCl<sub>3</sub>) δ 8.36 (d, *J* = 6.8 Hz, 1H), 8.09 (s, 1H), 7.60–7.57 (m, 3H), 7.45 (t, *J* = 7.8 Hz, 2H), 7.28 (t, *J* = 7.8 Hz, 1H), 6.61 (dd, *J* = 6.8, 1.6 Hz, 1H), 2.40 (s, 3H); <sup>13</sup>C NMR (101 MHz, CDCl<sub>3</sub>) δ 140.6, 137.1, 134.8, 133.5, 128.9, 128.2, 126.9, 126.0, 115.7, 114.6, 111.7, 21.4; HRMS (ESI) *m/z* calcd for C<sub>14</sub>H<sub>13</sub>N<sub>2</sub> [M+H]<sup>+</sup>: 209.1073 found 209.1073.

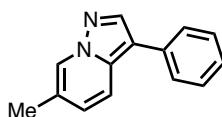

### 6-Methyl-3-phenylpyrazolo[1,5-*a*]pyridine (**1AF**)

Purification by Isolera<sup>®</sup> (hexane/EtOAc = 49:1 to 19:1) afforded **1AF** (127 mg, 12% yield over 4 steps) as a white solid. <sup>1</sup>H NMR (400 MHz, CDCl<sub>3</sub>) δ 8.29 (s, 1H), 8.08 (s, 1H), 7.73 (d, *J* = 9.2 Hz, 1H), 7.59 (dd, *J* = 8.0, 1.2 Hz, 2H), 7.44 (t, *J* = 8.0 Hz, 2H), 7.29 (t, *J* = 8.0 Hz, 1H), 7.04 (d, *J* = 9.2 Hz, 1H), 2.36 (s, 3H); <sup>13</sup>C NMR (101 MHz, CDCl<sub>3</sub>) δ 139.7, 135.5, 133.4, 128.9, 127.1, 126.90, 126.87, 126.0, 121.8, 116.8, 112.5, 18.1; HRMS (ESI) *m/z* calcd for C<sub>14</sub>H<sub>13</sub>N<sub>2</sub> [M+H]<sup>+</sup>: 209.1073 found 209.1072.

## 3. Preparation of Other Bicyclic or Tricyclic Azaarenes **1**

### 3-1. Synthesis of **1AH** and **1AI**

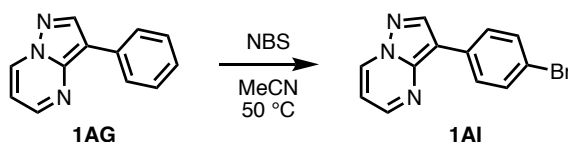

To a solution of **1AG** (78.1 mg, 0.400 mmol, 1.0 equiv) in MeCN (2.0 mL) was added *N*-bromosuccinimide (NBS: 78.3 mg, 0.440 mmol, 1.1 equiv) in one portion at room temperature. The mixture was stirred at 50 °C for 24 h. After cooling the mixture to room temperature, the mixture was concentrated *in vacuo*. The residue was purified by Isolera<sup>®</sup> (hexane/EtOAc = 49:1 to 19:1) to afford 3-(4-bromophenyl)pyrazolo[1,5-*a*]pyrimidine (**1AI**: 109 mg, quant.) as a yellow solid. <sup>1</sup>H NMR (400 MHz, CDCl<sub>3</sub>) δ 8.70 (dd, *J* = 7.2, 1.6 Hz, 1H), 8.57 (dd, *J* = 3.6, 1.6 Hz, 1H), 8.42 (s, 1H), 7.93 (d, *J* = 8.8 Hz, 2H), 7.57 (d, *J* = 8.8 Hz, 2H), 6.87 (dd, *J* = 7.2, 3.6 Hz, 1H); <sup>13</sup>C NMR (101 MHz, CDCl<sub>3</sub>) δ 149.4, 144.8, 142.6, 135.4, 131.8, 130.8, 127.8, 120.1, 109.7, 108.2; HRMS (ESI) *m/z* calcd for C<sub>12</sub>H<sub>9</sub>BrN<sub>3</sub> [M+H]<sup>+</sup>: 273.9974 found 273.9973.

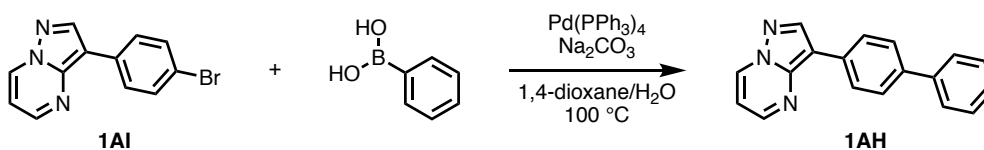

A round-bottom flask containing a magnetic stirring bar was dried with a heat-gun *in vacuo* and filled with N<sub>2</sub> gas after cooling to room temperature. To this flask were added Pd(PPh<sub>3</sub>)<sub>4</sub> (23.1 mg, 20.0 μmol, 5.0 mol%), **1AI** (109 mg, 0.400 mmol, 1.0 equiv), and phenylboronic acid (48.8 mg, 0.400 mmol, 1.0 equiv). The flask was placed under vacuum and refilled with N<sub>2</sub> gas three times. To the flask were added degassed 1.0 M Na<sub>2</sub>CO<sub>3</sub> aq. (800 μL, 0.800 mmol, 2.0 equiv) and 1,4-dioxane (3.2 mL) under stream of N<sub>2</sub> gas. The mixture was stirred at 100 °C for 18 h. After cooling the reaction mixture to room temperature, H<sub>2</sub>O was added. The mixture was extracted with Et<sub>2</sub>O and washed with brine. The

combined organic layer was dried over  $\text{MgSO}_4$ , filtered, and concentrated *in vacuo*. The residue was purified by Isolera<sup>®</sup> (hexane/EtOAc = 19:1 to 4:1) to afford 3-([1,1'-biphenyl]-4-yl)pyrazolo[1,5-*a*]pyrimidine (**1AH**: 86.8 mg, 80% yield) as a yellow solid.  $^1\text{H}$  NMR (400 MHz,  $\text{CDCl}_3$ )  $\delta$  8.71 (dd,  $J = 6.8, 1.2$  Hz, 1H), 8.59 (dd,  $J = 4.0, 1.2$  Hz, 1H), 8.49 (s, 1H), 8.12 (d,  $J = 8.0$  Hz, 2H), 7.70 (d,  $J = 8.0$  Hz, 2H), 7.65 (d,  $J = 7.2$  Hz, 2H), 7.46 (t,  $J = 7.2$  Hz, 2H), 7.35 (t,  $J = 7.2$  Hz, 1H), 6.87 (dd,  $J = 6.8, 4.0$  Hz, 1H);  $^{13}\text{C}$  NMR (101 MHz,  $\text{CDCl}_3$ )  $\delta$  149.2, 144.9, 142.8, 140.9, 139.1, 135.4, 130.9, 128.8, 127.5, 127.2, 126.9, 126.7, 110.5, 108.1; HRMS (ESI)  $m/z$  calcd for  $\text{C}_{18}\text{H}_{14}\text{N}_3$   $[\text{M}+\text{H}]^+$ : 272.1182 found 272.1180.

### 3-2. Synthesis of 1AJ–1AL

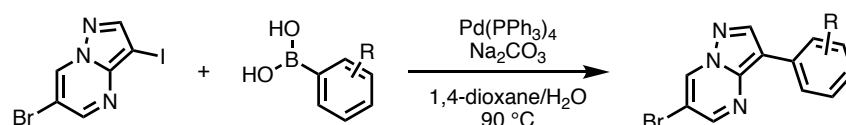

A round-bottom flask containing a magnetic stirring bar was dried with a heat-gun *in vacuo* and filled with  $\text{N}_2$  gas after cooling to room temperature. To this flask were added  $\text{Pd}(\text{PPh}_3)_4$  (5.0 mol%), 6-bromo-3-iodopyrazolo[1,5-*a*]pyrimidine<sup>[11]</sup> (1.0 equiv), and aryl boronic acid (1.0 equiv). The flask was placed under vacuum and refilled with  $\text{N}_2$  gas three times. To the flask were added degassed 1.0 M  $\text{Na}_2\text{CO}_3$  aq. (2.0 equiv) and 1,4-dioxane (0.10 M) under stream of  $\text{N}_2$  gas. The mixture was stirred at 90 °C for 24 h. After cooling the reaction mixture to room temperature,  $\text{H}_2\text{O}$  was added. The mixture was extracted with  $\text{Et}_2\text{O}$  and washed with brine. The combined organic layer was dried over  $\text{MgSO}_4$ , filtered, and concentrated *in vacuo*. The residue was purified by Isolera<sup>®</sup> to afford the corresponding 3-aryl-6-bromopyrazolo[1,5-*a*]pyrimidine **1**.

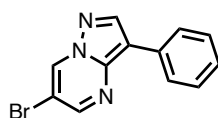

#### 6-Bromo-3-phenylpyrazolo[1,5-*a*]pyrimidine (1AJ)

Purification by Isolera<sup>®</sup> (hexane/EtOAc = 99:1 to 19:1) afforded **1AJ** (203 mg, 74% yield, 1.00 mmol scale) as a yellow solid.  $^1\text{H}$  NMR (400 MHz,  $\text{CDCl}_3$ )  $\delta$  8.83 (d,  $J = 2.4$  Hz, 1H), 8.53 (d,  $J = 2.4$  Hz, 1H), 8.41 (s, 1H), 8.00 (dd,  $J = 7.6, 1.2$  Hz, 2H), 7.46 (t,  $J = 7.6$  Hz, 2H), 7.30 (t,  $J = 7.6$  Hz, 1H);  $^{13}\text{C}$  NMR (101 MHz,  $\text{CDCl}_3$ )  $\delta$  149.8, 143.1, 142.9, 135.0, 131.1, 128.8, 126.7, 126.3, 111.7, 103.7; HRMS (ESI)  $m/z$  calcd for  $\text{C}_{12}\text{H}_9\text{BrN}_3$   $[\text{M}+\text{H}]^+$ : 273.9974 found 273.9974.

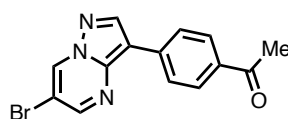

#### 1-(4-(6-Bromopyrazolo[1,5-*a*]pyrimidin-3-yl)phenyl)ethan-1-one (1AK)



Purification by Isolera<sup>®</sup> (hexane/EtOAc = 49:1 to 19:1) afforded **1AK** (128 mg, 51% yield, 0.800 mmol scale) as a yellow solid. <sup>1</sup>H NMR (400 MHz, CDCl<sub>3</sub>) δ 8.86 (d, *J* = 2.0 Hz, 1H), 8.60 (d, *J* = 2.0 Hz, 1H), 8.48 (s, 1H), 8.14 (d, *J* = 8.8 Hz, 2H), 8.05 (d, *J* = 8.8 Hz, 2H), 2.64 (s, 3H); <sup>13</sup>C NMR (101 MHz, CDCl<sub>3</sub>) δ 197.6, 150.6, 143.5, 143.4, 136.1, 135.3, 135.1, 129.0, 126.0, 110.5, 104.3, 26.6; HRMS (ESI) *m/z* calcd for C<sub>14</sub>H<sub>11</sub>BrN<sub>3</sub>O [M+H]<sup>+</sup>: 316.0080 found 316.0081.

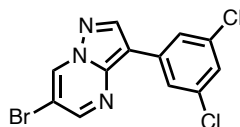

### 6-Bromo-3-(3,5-dichlorophenyl)pyrazolo[1,5-*a*]pyrimidine (**1AL**)

Purification by Isolera<sup>®</sup> (hexane/EtOAc = 49:1 to 19:1) afforded **1AL** (189 mg, 69% yield, 0.800 mmol scale) as a yellow solid. <sup>1</sup>H NMR (400 MHz, CDCl<sub>3</sub>) δ 8.85 (d, *J* = 2.4 Hz, 1H), 8.59 (d, *J* = 2.4 Hz, 1H), 8.39 (s, 1H), 7.95 (d, *J* = 2.0 Hz, 2H), 7.27 (t, *J* = 2.0 Hz, 1H); <sup>13</sup>C NMR (101 MHz, CDCl<sub>3</sub>) δ 150.7, 143.1, 135.4, 134.1, 126.5, 124.2, 114.7, 108.9, 104.6; HRMS (ESI) *m/z* calcd for C<sub>12</sub>H<sub>6</sub>BrCl<sub>2</sub>N<sub>3</sub> [M]<sup>+</sup>: 340.9117 found 340.9115.

### 3-3. Synthesis of **1AN**

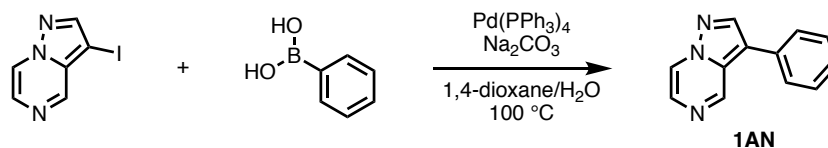

A round-bottom flask containing a magnetic stirring bar was dried with a heat-gun *in vacuo* and filled with N<sub>2</sub> gas after cooling to room temperature. To this flask were added Pd(PPh<sub>3</sub>)<sub>4</sub> (57.7 mg, 50.0 μmol, 5.0 mol%), 3-iodopyrazolo[1,5-*a*]pyrimidine<sup>[12]</sup> (245 mg, 1.00 mmol, 1.0 equiv), and phenylboronic acid (121 mg, 1.00 mmol, 1.0 equiv). The flask was placed under vacuum and refilled with N<sub>2</sub> gas three times. To the flask were added degassed 1.0 M Na<sub>2</sub>CO<sub>3</sub> aq. (2.0 mL, 2.00 mmol, 2.0 equiv) and 1,4-dioxane (8.0 mL) under stream of N<sub>2</sub> gas. The mixture was stirred at 100 °C for 12 h. After cooling the reaction mixture to room temperature, H<sub>2</sub>O was added. The mixture was extracted with Et<sub>2</sub>O and washed with brine. The combined organic layer was dried over MgSO<sub>4</sub>, filtered, and concentrated *in vacuo*. The residue was purified by Isolera<sup>®</sup> (hexane/EtOAc = 19:1 to 4:1) to afford 3-phenylpyrazolo[1,5-*a*]pyrimidine (**1AN**: 195 mg, quant.) as a pale yellow solid. <sup>1</sup>H NMR (400 MHz, CDCl<sub>3</sub>) δ 9.30 (d, *J* = 1.6 Hz, 1H), 8.40 (dd, *J* = 4.8, 1.6 Hz, 1H), 8.21 (s, 1H), 7.90 (d, *J* = 4.8 Hz, 1H), 7.66–7.63 (m, 2H), 7.53–7.49 (m, 2H), 7.40–7.36 (m, 1H); <sup>13</sup>C NMR (101 MHz, CDCl<sub>3</sub>) δ 144.5, 140.3, 132.4, 131.4, 129.5, 129.3, 127.5, 127.4, 122.0, 115.7; HRMS (ESI) *m/z* calcd for C<sub>12</sub>H<sub>10</sub>N<sub>3</sub> [M+H]<sup>+</sup>: 196.0869 found 196.0869.

### 3-4. Synthesis of **1AO**

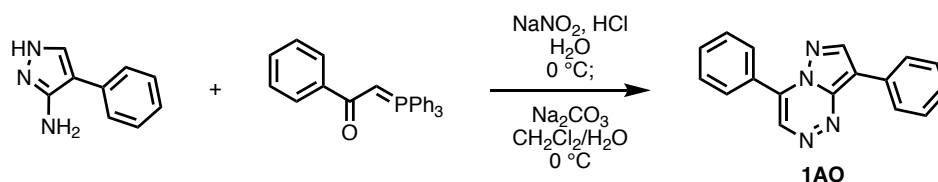

To a round-bottom flask containing a magnetic stirring bar were added 4-phenyl-1*H*-pyrazol-3-amine<sup>[13]</sup> (79.6 mg, 0.500 mmol, 1.0 equiv) and conc. HCl (0.20 mL) and H<sub>2</sub>O (0.40 mL). To the mixture was added a solution of NaNO<sub>2</sub> (38.0 mg, 0.550 mmol, 1.1 equiv) in H<sub>2</sub>O (0.13 mL) dropwise at 0 °C. After the mixture was stirred for 30 min at 0 °C, CH<sub>2</sub>Cl<sub>2</sub> (4.0 mL) and Na<sub>2</sub>CO<sub>3</sub> aq. (2.2 mL) were added. To the resulting mixture was added a solution of 1-phenyl-2-(triphenyl-λ<sup>5</sup>-phosphaneylidene)ethan-1-one<sup>[14]</sup> (209 mg, 0.550 mmol, 1.1 equiv) in CH<sub>2</sub>Cl<sub>2</sub> (1.9 mL) dropwise at 0 °C. After stirring for 5 min, CH<sub>2</sub>Cl<sub>2</sub> and H<sub>2</sub>O added and the mixture was extracted with CH<sub>2</sub>Cl<sub>2</sub>. The combined organic layer was dried over Na<sub>2</sub>SO<sub>4</sub>, filtered, and concentrated *in vacuo*. The residue was purified by Isolera<sup>®</sup> (hexane/EtOAc = 19:1 to 4:1) to afford 4,8-diphenylpyrazolo[5,1-*c*][1,2,4]triazine (**1AO**: 91.4 mg, 68% yield) as a yellow solid. <sup>1</sup>H NMR (400 MHz, CDCl<sub>3</sub>) δ 8.96 (s, 1H), 8.61 (s, 1H), 8.26 (dd, *J* = 8.8, 1.2 Hz, 2H), 8.23–8.21 (m, 2H), 7.68–7.63 (m, 3H), 7.53 (t, *J* = 7.6 Hz, 2H), 7.39 (t, *J* = 7.6 Hz, 1H); <sup>13</sup>C NMR (101 MHz, CDCl<sub>3</sub>) δ 147.6, 142.8, 134.0, 132.1, 131.8, 130.3, 129.4, 129.0, 128.9, 127.5, 127.4, 127.1, 113.5; HRMS (ESI) *m/z* calcd for C<sub>17</sub>H<sub>13</sub>N<sub>4</sub> [M+H]<sup>+</sup>: 273.1135 found 273.1133.

### 3-5. Preparation of 1AP

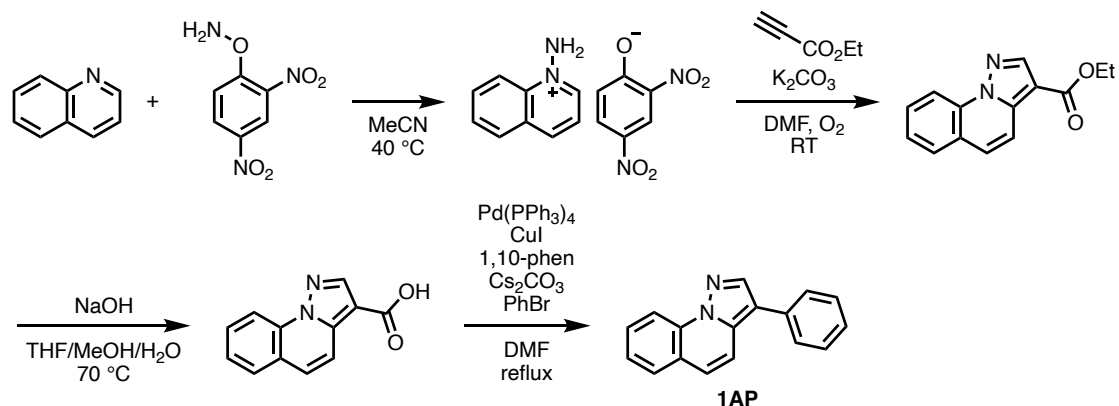

To a round-bottom flask containing a magnetic stirring bar were added quinoline (646 mg, 5.00 mmol, 1.0 equiv) and MeCN (4.0 mL). To this mixture was added *O*-(2,4-dinitrophenyl)hydroxylamine<sup>[10]</sup> (996 mg, 5.00 mmol, 1.0 equiv) in one portion. The mixture was stirred at 40 °C for 24 h. The solvent was removed under reduced pressure and the residue was triturated with Et<sub>2</sub>O. The resulting solid was filtered and dried *in vacuo*. The obtained solid containing *N*-aminoquinolinium salt was used for the next step without further purification.

To a round-bottom flask containing a magnetic stirring bar and a solution of the crude material in DMF (2.0 mL) were added potassium carbonate (967 mg, 7.00 mmol, 1.4 equiv) and ethyl propiolate (562 μL, 5.50 mmol, 1.1 equiv) at room temperature. Air was introduced to the reaction mixture by diaphragm

pump. The reaction mixture was stirred for 24 h. The solvent was removed *in vacuo*, and the mixture was extracted with Et<sub>2</sub>O. The combined organic layer was dried over MgSO<sub>4</sub>, filtered, and concentrated *in vacuo*. The residue was purified by Isolera<sup>®</sup> (hexane/EtOAc = 19:1 to 4:1) to afford ethyl pyrazolo[1,5-*a*]quinoline-3-carboxylate (420 mg, 35% yield over two steps) as a pale yellow solid.

To a round-bottom flask containing a magnetic stirring bar and ethyl pyrazolo[1,5-*a*]quinoline-3-carboxylate (365 mg, 1.52 mmol, 1.0 equiv) were added THF (1.7 mL), MeOH (1.7 mL), H<sub>2</sub>O (1.7 mL), and 6.0 M NaOH aq. (500 μL, 3.04 mmol, 2.0 equiv) at room temperature. The reaction mixture was stirred at 70 °C. After completion of the reaction, the mixture was adjusted to pH = 7 with DOWEX<sup>®</sup> 50W. The mixture was filtered and washed with MeOH. The filtrate was concentrated *in vacuo* to afford pyrazolo[1,5-*a*]quinoline-3-carboxylic acid. The crude material was used for the next step without further purification.

A round-bottom flask containing a magnetic stirring bar and cesium carbonate (744 mg, 2.28 mmol, 1.5 equiv) was dried with a heat-gun *in vacuo* and filled with N<sub>2</sub> gas after cooling to room temperature. To this flask were added Pd(PPh<sub>3</sub>)<sub>4</sub> (87.8 mg, 76.0 μmol, 5.0 mol%), copper iodide (28.9 mg, 1.52 mmol, 10 mol%), 1,10-phenanthroline (27.3 mg, 1.52 mmol, 10 mol%), and the crude material containing pyrazolo[1,5-*a*]quinoline-3-carboxylic acid. The flask was placed under vacuum and refilled with N<sub>2</sub> gas three times. To this flask were added bromobenzene (160 μL, 1.52 mmol, 1.0 equiv) and DMF (7.1 mL). The mixture was heated under reflux and stirred for 18 h. After cooled to room temperature, the mixture was passed through a short silica-gel pad with EtOAc as an eluent, and then concentrated *in vacuo*. The residue was purified by Isolera<sup>®</sup> (hexane/EtOAc = 49:1 to 19:1) to afford 3-phenylpyrazolo[1,5-*a*]quinoline (**1AP**: 87.9 mg, 24% yield over two steps) as a pale yellow solid. <sup>1</sup>H NMR (400 MHz, CDCl<sub>3</sub>) δ 8.61 (d, *J* = 8.8 Hz, 1H), 8.20 (s, 1H), 7.78 (d, *J* = 7.8 Hz, 1H), 7.72 (d, *J* = 8.8 Hz, 1H), 7.70 (td, *J* = 8.8, 1.2 Hz, 1H), 7.63 (d, *J* = 6.8 Hz, 2H), 7.50–7.45 (m, 4H), 7.34 (t, *J* = 7.2 Hz, 1H); <sup>13</sup>C NMR (101 MHz, CDCl<sub>3</sub>) δ 139.9, 134.7, 133.0, 129.6, 129.0, 128.3, 127.5, 126.6, 125.1, 124.9, 123.4, 115.93, 115.86, 115.5 (one peak is missing due to overlapping); HRMS (ESI) *m/z* calcd for C<sub>17</sub>H<sub>13</sub>N<sub>2</sub> [M+H]<sup>+</sup>: 245.1073 found 245.1071.

### 3-6. Synthesis of 1AQ

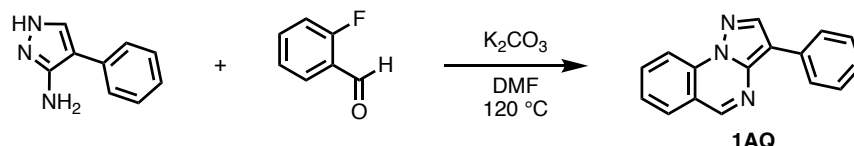

To a round-bottom flask containing a magnetic stirring bar were added 4-phenyl-1H-pyrazol-3-amine<sup>[13]</sup> (477 mg, 3.00 mmol, 1.0 equiv), 2-fluorobenzaldehyde (372 mg, 3.00 mmol, 1.0 equiv), potassium carbonate (1.24 g, 9.00 mmol, 3.0 equiv), and DMF (10 mL) at room temperature. The mixture was stirred at 120 °C for 24 h. After cooling the mixture to room temperature, H<sub>2</sub>O was added. The mixture was extracted with Et<sub>2</sub>O and washed with brine. The combined organic layer was dried

over MgSO<sub>4</sub>, filtered, and concentrated *in vacuo*. The residue was purified by Isolera<sup>®</sup> (hexane/EtOAc = 19:1 to 4:1) to afford 3-phenylpyrazolo[1,5-*a*]quinazoline (**1AQ**: 147 mg, 20% yield) as a yellow solid. <sup>1</sup>H NMR (400 MHz, CDCl<sub>3</sub>) δ 8.94 (s, 1H), 8.48 (d, *J* = 8.4 Hz, 1H), 8.40 (s, 1H), 8.06 (dd, *J* = 8.4, 1.2 Hz, 2H), 7.96 (dd, *J* = 8.0, 0.8 Hz, 1H), 7.91 (ddd, *J* = 8.4, 7.2, 1.6 Hz, 1H), 7.56 (ddd, *J* = 8.4, 7.2, 1.6 Hz, 1H), 7.48 (dd, *J* = 8.4, 7.2 Hz, 2H), 7.31 (t, *J* = 7.2 Hz, 1H); <sup>13</sup>C NMR (101 MHz, CDCl<sub>3</sub>) δ 151.6, 142.0, 140.7, 136.4, 134.2, 131.9, 128.8, 128.3, 126.7, 126.6, 125.4, 118.7, 114.7, 113.7; HRMS (ESI) *m/z* calcd for C<sub>16</sub>H<sub>12</sub>N<sub>3</sub> [M+H]<sup>+</sup>: 246.1025 found 246.1025.

#### 4. Ring-Opening Fluorination of Bicyclic Azaarenes

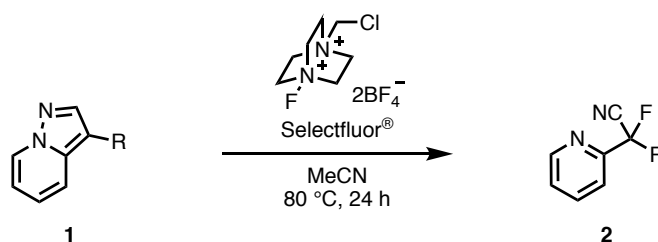

##### General Procedure

An 8-mL glass tube equipped with a screw cap containing a magnetic stirring bar was dried with a heat-gun *in vacuo* and filled with N<sub>2</sub> gas after cooling to room temperature. To this tube were added azaarenes **1** (0.200 mmol, 1.0 equiv) and Selectfluor<sup>®</sup> (70.8 mg, 0.200 mmol, 1.0 equiv). The tube was placed under vacuum and refilled with N<sub>2</sub> gas three times. To this tube was added MeCN (1.0 mL). The tube was sealed with a screw cap and then heated at 80 °C for 24 h with stirring. After cooling the reaction mixture to room temperature, the mixture was concentrated *in vacuo*. The residue was purified to afford the corresponding fluorinated compound **2**.

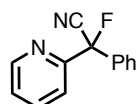

##### 2-Fluoro-2-phenyl-2-(pyridin-2-yl)acetonitrile (**2A**)

Purification by PTLC (hexane/EtOAc = 4:1) afforded **2A** (41.2 mg, 97% yield) as a colorless solid. <sup>1</sup>H NMR (400 MHz, CDCl<sub>3</sub>) δ 8.67 (dt, *J* = 4.4, 0.8 Hz, 1H), 7.82 (td, *J* = 7.6, 1.2 Hz, 1H), 7.60 (dd, *J* = 7.6, 1.2 Hz, 1H), 7.58–7.53 (m, 2H), 7.46–7.40 (m, 3H), 7.38–7.32 (m, 1H); <sup>13</sup>C NMR (101 MHz, CDCl<sub>3</sub>) δ 155.1 (d, *J*<sub>C-F</sub> = 28.9 Hz), 149.7, 137.6, 135.8 (d, *J*<sub>C-F</sub> = 24.1 Hz), 130.2, 128.9, 125.8 (d, *J*<sub>C-F</sub> = 5.9 Hz), 124.5, 119.6 (d, *J*<sub>C-F</sub> = 5.9 Hz), 116.7 (d, *J*<sub>C-F</sub> = 33.7 Hz), 92.0 (d, *J*<sub>C-F</sub> = 186.9 Hz); <sup>19</sup>F NMR (376 MHz, CDCl<sub>3</sub>) δ -142.2; HRMS (ESI) *m/z* calcd for C<sub>13</sub>H<sub>10</sub>FN<sub>2</sub> [M+H]<sup>+</sup>: 213.0823 found 213.0821.

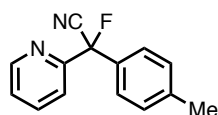

## 2-Fluoro-2-(pyridin-2-yl)-2-(*p*-tolyl)acetonitrile (2B)

Purification by PTLC (hexane/EtOAc = 4:1) afforded **2B** (30.8 mg, 68% yield) as a colorless oil.  $^1\text{H}$  NMR (400 MHz,  $\text{CDCl}_3$ )  $\delta$  8.67 (d,  $J = 4.8$  Hz, 1H), 7.82 (td,  $J = 8.0, 1.2$  Hz, 1H), 7.61 (dd,  $J = 7.6, 1.2$  Hz, 1H), 7.43 (d,  $J = 8.0$  Hz, 2H), 7.35 (ddd,  $J = 7.6, 4.8, 1.2$  Hz, 1H), 7.23 (d,  $J = 8.0$  Hz, 2H), 2.36 (s, 3H);  $^{13}\text{C}$  NMR (101 MHz,  $\text{CDCl}_3$ )  $\delta$  155.4 (d,  $J_{\text{C-F}} = 28.9$  Hz), 149.7, 140.5, 137.5, 133.0 (d,  $J_{\text{C-F}} = 24.0$  Hz), 129.6, 125.9 (d,  $J_{\text{C-F}} = 5.8$  Hz), 124.4, 119.7 (d,  $J_{\text{C-F}} = 4.8$  Hz), 116.8 (d,  $J_{\text{C-F}} = 34.6$  Hz), 92.0 (d,  $J_{\text{C-F}} = 185.8$  Hz), 21.2;  $^{19}\text{F}$  NMR (376 MHz,  $\text{CDCl}_3$ )  $\delta$  -140.3; HRMS (ESI)  $m/z$  calcd for  $\text{C}_{14}\text{H}_{11}\text{FN}_2\text{Na}$   $[\text{M}+\text{Na}]^+$ : 249.0799 found 249.0798.

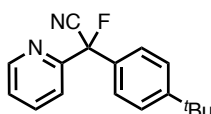

## 2-(4-(*tert*-Butyl)phenyl)-2-fluoro-2-(pyridin-2-yl)acetonitrile (2C)

Purification by PTLC (hexane/EtOAc = 4:1) afforded **2C** (31.1 mg, 58% yield) as a yellow oil.  $^1\text{H}$  NMR (400 MHz,  $\text{CDCl}_3$ )  $\delta$  8.68 (d,  $J = 5.2$  Hz, 1H), 7.82 (td,  $J = 7.6, 1.6$  Hz, 1H), 7.62 (dd,  $J = 7.6, 1.2$  Hz, 1H), 7.49–7.41 (m, 4H), 7.35 (ddd,  $J = 7.6, 5.2, 0.8$  Hz, 1H), 1.30 (s, 9H);  $^{13}\text{C}$  NMR (101 MHz,  $\text{CDCl}_3$ )  $\delta$  155.3 (d,  $J_{\text{C-F}} = 29.1$  Hz), 153.5, 149.7, 137.5, 132.9 (d,  $J_{\text{C-F}} = 24.2$  Hz), 125.9, 125.7 (d,  $J_{\text{C-F}} = 4.8$  Hz), 124.4, 119.7 (d,  $J_{\text{C-F}} = 4.8$  Hz), 116.8 (d,  $J_{\text{C-F}} = 33.0$  Hz), 92.0 (d,  $J_{\text{C-F}} = 185.2$  Hz), 34.7, 31.1;  $^{19}\text{F}$  NMR (376 MHz,  $\text{CDCl}_3$ )  $\delta$  -140.3; HRMS (ESI)  $m/z$  calcd for  $\text{C}_{17}\text{H}_{17}\text{FN}_2\text{Na}$   $[\text{M}+\text{Na}]^+$ : 291.1268 found 291.1266.

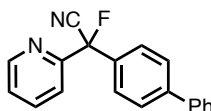

## 2-([1,1'-Biphenyl]-4-yl)-2-fluoro-2-(pyridin-2-yl)acetonitrile (2D)

Purification by PTLC (hexane/EtOAc = 4:1) afforded **2D** (32.9 mg, 57% yield) as a white solid.  $^1\text{H}$  NMR (400 MHz,  $\text{CDCl}_3$ )  $\delta$  8.70 (dd,  $J = 4.8, 1.2$  Hz, 1H), 7.85 (td,  $J = 7.6, 1.6$  Hz, 1H), 7.67–7.61 (m, 5H), 7.58–7.55 (m, 2H), 7.47–7.43 (m, 2H), 7.39–7.36 (m, 2H);  $^{13}\text{C}$  NMR (101 MHz,  $\text{CDCl}_3$ )  $\delta$  155.2 (d,  $J_{\text{C-F}} = 29.1$  Hz), 149.8, 143.2, 139.8, 137.6, 134.6 (d,  $J_{\text{C-F}} = 23.2$  Hz), 128.9, 128.0, 127.7, 127.2, 126.4 (d,  $J_{\text{C-F}} = 5.8$  Hz), 124.6, 119.7 (d,  $J_{\text{C-F}} = 5.8$  Hz), 116.7 (d,  $J_{\text{C-F}} = 34.9$  Hz), 91.9 (d,  $J_{\text{C-F}} = 187.2$  Hz);  $^{19}\text{F}$  NMR (376 MHz,  $\text{CDCl}_3$ )  $\delta$  -141.6; HRMS (ESI)  $m/z$  calcd for  $\text{C}_{19}\text{H}_{14}\text{FN}_2$   $[\text{M}+\text{H}]^+$ : 289.1136 found 289.1133.

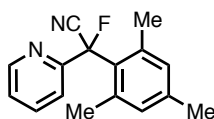

## 2-Fluoro-2-mesityl-2-(pyridin-2-yl)acetonitrile (2E)

Purification by PTLC (hexane/EtOAc = 4:1) afforded **2E** (20.9 mg, 41% yield) as a yellow solid. <sup>1</sup>H NMR (400 MHz, CDCl<sub>3</sub>) δ 8.73 (d, *J* = 4.4 Hz, 1H), 7.76 (t, *J* = 7.6 Hz, 1H), 7.41–7.35 (m, 2H), 6.90 (s, 2H), 2.30–2.26 (m, 9H); <sup>13</sup>C NMR (101 MHz, CDCl<sub>3</sub>) δ 155.4 (d, *J*<sub>C-F</sub> = 23.1 Hz), 149.8, 139.2, 137.6, 136.3, 131.7, 128.6 (d, *J*<sub>C-F</sub> = 21.2 Hz), 124.9 (d, *J*<sub>C-F</sub> = 2.8 Hz), 121.6 (d, *J*<sub>C-F</sub> = 2.9 Hz), 116.6 (d, *J*<sub>C-F</sub> = 35.7 Hz), 94.8 (d, *J*<sub>C-F</sub> = 182.0 Hz), 22.5 (d, *J*<sub>C-F</sub> = 7.8 Hz), 20.7; <sup>19</sup>F NMR (376 MHz, CDCl<sub>3</sub>) δ -128.4; HRMS (ESI) *m/z* calcd for C<sub>16</sub>H<sub>16</sub>FN<sub>2</sub> [M+H]<sup>+</sup>: 255.1292 found 255.1291.

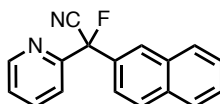

### 2-Fluoro-2-(naphthalen-2-yl)-2-(pyridin-2-yl)acetonitrile (**2F**)

Purification by PTLC (hexane/EtOAc = 4:1) and GPC afforded **2F** (28.3 mg, 54% yield) as a white solid. <sup>1</sup>H NMR (400 MHz, CDCl<sub>3</sub>) δ 8.69 (d, *J* = 4.4 Hz, 1H), 8.13 (s, 1H), 7.93–7.80 (m, 4H), 7.67 (dd, *J* = 7.6, 1.2 Hz, 1H), 7.57–7.53 (m, 3H), 7.37 (dd, *J* = 7.6, 4.8 Hz, 1H); <sup>13</sup>C NMR (101 MHz, CDCl<sub>3</sub>) δ 155.2 (d, *J*<sub>C-F</sub> = 29.0 Hz), 149.8, 137.6, 133.7, 132.9 (d, *J*<sub>C-F</sub> = 24.1 Hz), 132.6, 129.1, 128.7, 127.7, 127.6, 127.0, 125.8 (d, *J*<sub>C-F</sub> = 6.7 Hz), 124.6, 122.4 (d, *J*<sub>C-F</sub> = 4.8 Hz), 119.8 (d, *J*<sub>C-F</sub> = 5.9 Hz), 116.7 (d, *J*<sub>C-F</sub> = 32.4 Hz), 92.3 (d, *J*<sub>C-F</sub> = 185.8 Hz); <sup>19</sup>F NMR (376 MHz, CDCl<sub>3</sub>) δ -141.9; HRMS (ESI) *m/z* calcd for C<sub>17</sub>H<sub>11</sub>FN<sub>2</sub>Na [M+Na]<sup>+</sup>: 285.0799 found 285.0798.

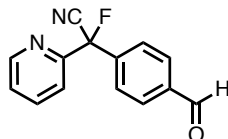

### 2-Fluoro-2-(4-formylphenyl)-2-(pyridin-2-yl)acetonitrile (**2G**)

Purification by PTLC (hexane/EtOAc = 4:1) afforded **2G** (38.4 mg, 80% yield) as a white solid. <sup>1</sup>H NMR (400 MHz, CDCl<sub>3</sub>) δ 10.1 (s, 1H), 8.67 (dd, *J* = 4.0, 0.8 Hz, 1H), 7.96 (d, *J* = 8.0 Hz, 2H), 7.85 (td, *J* = 8.0, 1.6 Hz, 1H), 7.79 (d, *J* = 8.0 Hz, 2H), 7.65 (dd, *J* = 8.0, 0.8 Hz, 1H), 7.39 (dd, *J* = 8.0, 4.8 Hz, 1H); <sup>13</sup>C NMR (101 MHz, CDCl<sub>3</sub>) δ 191.2, 154.4 (d, *J*<sub>C-F</sub> = 28.9 Hz), 149.9, 141.5 (d, *J*<sub>C-F</sub> = 24.0 Hz), 137.8, 137.3, 130.1, 126.4 (d, *J*<sub>C-F</sub> = 5.9 Hz), 124.9, 119.5 (d, *J*<sub>C-F</sub> = 5.8 Hz), 116.1 (d, *J*<sub>C-F</sub> = 32.7 Hz), 91.4 (d, *J*<sub>C-F</sub> = 187.9 Hz); <sup>19</sup>F NMR (376 MHz, CDCl<sub>3</sub>) δ -146.2; HRMS (ESI) *m/z* calcd for C<sub>14</sub>H<sub>10</sub>FN<sub>2</sub>O [M+H]<sup>+</sup>: 241.0772 found 241.0770.

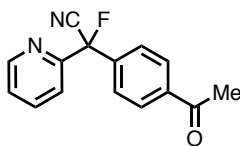

### 2-(4-Acetylphenyl)-2-fluoro-2-(pyridin-2-yl)acetonitrile (**2H**)

Purification by filtration with chloroform afforded **2H** (50.8 mg, quant.) as a yellow oil. <sup>1</sup>H NMR (400 MHz, CDCl<sub>3</sub>) δ 8.67 (d, *J* = 4.4 Hz, 1H), 8.01 (d, *J* = 8.4 Hz, 2H), 7.85 (td, *J* = 7.6, 2.0 Hz, 1H), 7.70

(d,  $J = 8.4$  Hz, 2H), 7.63 (d,  $J = 7.6$  Hz, 1H), 7.38 (dd,  $J = 7.6, 4.4$  Hz, 1H), 2.61 (s, 3H);  $^{13}\text{C}$  NMR (101 MHz,  $\text{CDCl}_3$ )  $\delta$  197.0, 154.6 (d,  $J_{\text{C-F}} = 28.9$  Hz), 149.8, 140.2 (d,  $J_{\text{C-F}} = 24.0$  Hz), 138.2, 137.8, 128.8, 126.0 (d,  $J_{\text{C-F}} = 5.8$  Hz), 124.8, 119.5 (d,  $J_{\text{C-F}} = 5.8$  Hz), 116.2 (d,  $J_{\text{C-F}} = 32.7$  Hz), 91.5 (d,  $J_{\text{C-F}} = 187.8$  Hz), 26.7;  $^{19}\text{F}$  NMR (376 MHz,  $\text{CDCl}_3$ )  $\delta$  -145.7; HRMS (ESI)  $m/z$  calcd for  $\text{C}_{15}\text{H}_{12}\text{FN}_2\text{O}$   $[\text{M}+\text{H}]^+$ : 255.0928 found 255.0927.

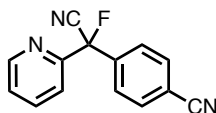

#### 4-(Cyanofluoro(pyridin-2-yl)methyl)benzonitrile (2I)

Purification by filtration with chloroform afforded **2I** (45.6 mg, 96% yield) as a yellow solid.  $^1\text{H}$  NMR (400 MHz,  $\text{CDCl}_3$ )  $\delta$  8.66 (dt,  $J = 4.8, 1.2$  Hz, 1H), 7.86 (td,  $J = 8.0, 1.6$  Hz, 1H), 7.76–7.73 (m, 4H), 7.65–7.63 (m, 1H), 7.40 (dd,  $J = 8.0, 1.2$  Hz, 1H);  $^{13}\text{C}$  NMR (101 MHz,  $\text{CDCl}_3$ )  $\delta$  154.0 (d,  $J_{\text{C-F}} = 29.1$  Hz), 149.9, 140.3 (d,  $J_{\text{C-F}} = 24.2$  Hz), 137.9, 132.6, 126.4 (d,  $J_{\text{C-F}} = 6.8$  Hz), 125.0, 119.4 (d,  $J_{\text{C-F}} = 5.8$  Hz), 117.7, 115.8 (d,  $J_{\text{C-F}} = 33.0$  Hz), 114.2, 91.0 (d,  $J_{\text{C-F}} = 189.1$  Hz);  $^{19}\text{F}$  NMR (376 MHz,  $\text{CDCl}_3$ )  $\delta$  -147.5; HRMS (ESI)  $m/z$  calcd for  $\text{C}_{14}\text{H}_9\text{FN}_3$   $[\text{M}+\text{H}]^+$ : 238.0775 found 238.0776.

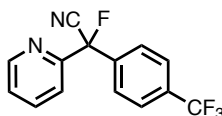

#### 2-Fluoro-2-(pyridin-2-yl)-2-(4-(trifluoromethyl)phenyl)acetonitrile (2J)

Purification by PTLC (hexane/EtOAc = 4:1) afforded **2J** (46.0 mg, quant.) as a colorless oil.  $^1\text{H}$  NMR (400 MHz,  $\text{CDCl}_3$ )  $\delta$  8.68 (d,  $J = 5.2$  Hz, 1H), 7.85 (td,  $J = 7.6, 1.2$  Hz, 1H), 7.74 (d,  $J = 8.8$  Hz, 2H), 7.71 (d,  $J = 8.8$  Hz, 2H), 7.64 (d,  $J = 7.6$  Hz, 1H), 7.39 (dd,  $J = 8.0, 5.2$  Hz, 1H);  $^{13}\text{C}$  NMR (101 MHz,  $\text{CDCl}_3$ )  $\delta$  154.4 (d,  $J_{\text{C-F}} = 28.2$  Hz), 149.9, 139.5 (d,  $J_{\text{C-F}} = 24.0$  Hz), 137.8, 132.3 (q,  $J_{\text{C-F}} = 32.8$  Hz), 126.2 (d,  $J_{\text{C-F}} = 5.8$  Hz), 126.0 (q,  $J_{\text{C-F}} = 3.8$  Hz), 124.9, 123.5 (q,  $J_{\text{C-F}} = 273.9$  Hz), 119.5 (d,  $J_{\text{C-F}} = 5.9$  Hz), 116.1 (d,  $J_{\text{C-F}} = 32.8$  Hz), 91.3 (d,  $J_{\text{C-F}} = 188.8$  Hz);  $^{19}\text{F}$  NMR (376 MHz,  $\text{CDCl}_3$ )  $\delta$  -63.0, -146.1; HRMS (ESI)  $m/z$  calcd for  $\text{C}_{14}\text{H}_9\text{F}_4\text{N}_2$   $[\text{M}+\text{H}]^+$ : 281.0696 found 281.0695.

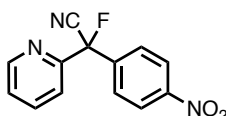

#### 2-Fluoro-2-(4-nitrophenyl)-2-(pyridin-2-yl)acetonitrile (2K)

Purification by filtration with chloroform afforded **2K** (51.4 mg, quant.) as a yellow oil.  $^1\text{H}$  NMR (400 MHz,  $\text{CDCl}_3$ )  $\delta$  8.67 (dd,  $J = 4.8, 1.2$  Hz, 1H), 8.30 (d,  $J = 9.2$  Hz, 2H), 7.87 (td,  $J = 7.6, 1.2$  Hz, 1H), 7.83 (d,  $J = 9.2$  Hz, 2H), 7.67 (dd,  $J = 7.6, 0.8$  Hz, 1H), 7.40 (dd,  $J = 7.6, 4.8$  Hz, 1H);  $^{13}\text{C}$  NMR (101 MHz,  $\text{CDCl}_3$ )  $\delta$  154.0 (d,  $J_{\text{C-F}} = 28.1$  Hz), 150.0, 148.8, 142.0 (d,  $J_{\text{C-F}} = 24.2$  Hz), 138.0, 126.8 (d,  $J_{\text{C-F}}$

= 6.9 Hz), 125.0, 124.1, 119.4 (d,  $J_{C-F}$  = 5.8 Hz), 115.8 (d,  $J_{C-F}$  = 32.9 Hz), 90.9 (d,  $J_{C-F}$  = 189.1 Hz);  $^{19}\text{F}$  NMR (376 MHz,  $\text{CDCl}_3$ )  $\delta$  -147.5; HRMS (ESI)  $m/z$  calcd for  $\text{C}_{13}\text{H}_9\text{FN}_3\text{O}_2$   $[\text{M}+\text{H}]^+$ : 258.0673 found 258.0672.

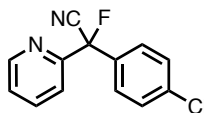

### 2-(4-Chlorophenyl)-2-fluoro-2-(pyridin-2-yl)acetonitrile (**2L**)

Purification by filtration with chloroform afforded **2L** (49.3 mg, quant.) as a yellow oil.  $^1\text{H}$  NMR (400 MHz,  $\text{CDCl}_3$ )  $\delta$  8.67 (d,  $J$  = 4.8 Hz, 1H), 7.84 (td,  $J$  = 7.6, 1.2 Hz, 1H), 7.61 (d,  $J$  = 8.0 Hz, 1H), 7.51 (d,  $J$  = 8.8 Hz, 2H), 7.41 (d,  $J$  = 8.8 Hz, 2H), 7.38 (dd,  $J$  = 7.6, 4.8 Hz, 1H);  $^{13}\text{C}$  NMR (101 MHz,  $\text{CDCl}_3$ )  $\delta$  154.7 (d,  $J_{C-F}$  = 29.1 Hz), 149.8, 137.7, 136.5, 134.4 (d,  $J_{C-F}$  = 24.2 Hz), 129.2, 127.3 (d,  $J_{C-F}$  = 5.9 Hz), 124.7, 119.5 (d,  $J_{C-F}$  = 5.9 Hz), 116.3 (d,  $J_{C-F}$  = 32.9 Hz), 91.4 (d,  $J_{C-F}$  = 188.2 Hz);  $^{19}\text{F}$  NMR (376 MHz,  $\text{CDCl}_3$ )  $\delta$  -143.0; HRMS (ESI)  $m/z$  calcd for  $\text{C}_{13}\text{H}_9\text{ClFN}_2$   $[\text{M}+\text{H}]^+$ : 247.0433 found 247.0432.

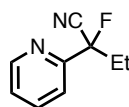

### 2-Fluoro-2-(pyridin-2-yl)butanenitrile (**2M**)

Purification by filtration with chloroform afforded **2M** (26.3 mg, 80% yield) as a colorless oil.  $^1\text{H}$  NMR (400 MHz,  $\text{CDCl}_3$ )  $\delta$  8.67 (dd,  $J$  = 4.8, 0.8 Hz, 1H), 7.83 (td,  $J$  = 8.0, 0.8 Hz, 1H), 7.57 (d,  $J$  = 8.0 Hz, 1H), 7.36 (dd,  $J$  = 8.0, 4.8 Hz, 1H), 2.49–2.27 (m, 2H), 1.13 (t,  $J$  = 7.2 Hz, 3H);  $^{13}\text{C}$  NMR (101 MHz,  $\text{CDCl}_3$ )  $\delta$  154.6 (d,  $J_{C-F}$  = 27.0 Hz), 149.6, 137.4, 124.4, 119.4 (d,  $J_{C-F}$  = 6.8 Hz), 116.8 (d,  $J_{C-F}$  = 33.7 Hz), 92.7 (d,  $J_{C-F}$  = 185.9 Hz), 33.2 (d,  $J_{C-F}$  = 23.1 Hz), 7.7 (d,  $J_{C-F}$  = 3.8 Hz);  $^{19}\text{F}$  NMR (376 MHz,  $\text{CDCl}_3$ )  $\delta$  -157.1 (t,  $J_{F-H}$  = 20.9 Hz); HRMS (ESI)  $m/z$  calcd for  $\text{C}_9\text{H}_{10}\text{FN}_2$   $[\text{M}+\text{H}]^+$ : 165.0823 found 165.0823.



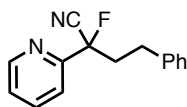

### 2-Fluoro-4-phenyl-2-(pyridin-2-yl)butanenitrile (2N)

Purification by PTLC (hexane/EtOAc = 4:1) afforded **2N** (44.7 mg, 93% yield) as a yellow oil.  $^1\text{H}$  NMR (400 MHz,  $\text{CDCl}_3$ )  $\delta$  8.67 (d,  $J = 5.2$  Hz, 1H), 7.83 (t,  $J = 8.0$  Hz, 1H), 7.61 (d,  $J = 8.0$  Hz, 1H), 7.37 (dd,  $J = 8.0, 5.2$  Hz, 3H), 7.31–7.24 (m, 2H), 7.23–7.15 (m, 3H), 3.01–2.78 (m, 2H), 2.78–2.50 (m, 2H);  $^{13}\text{C}$  NMR (101 MHz,  $\text{CDCl}_3$ )  $\delta$  154.4 (d,  $J_{\text{C-F}} = 27.0$  Hz), 149.7, 139.4, 137.5, 128.6, 128.3, 126.4, 124.6, 119.4 (d,  $J_{\text{C-F}} = 6.8$  Hz), 116.7 (d,  $J_{\text{C-F}} = 33.6$  Hz), 91.7 (d,  $J_{\text{C-F}} = 185.9$  Hz), 41.4 (d,  $J_{\text{C-F}} = 23.0$  Hz), 29.8 (d,  $J_{\text{C-F}} = 2.8$  Hz);  $^{19}\text{F}$  NMR (376 MHz,  $\text{CDCl}_3$ )  $\delta$  -156.0 (t,  $J_{\text{F-H}} = 24.1$  Hz); HRMS (ESI)  $m/z$  calcd for  $\text{C}_{15}\text{H}_{14}\text{FN}_2$   $[\text{M}+\text{H}]^+$ : 241.1136 found 241.1134.

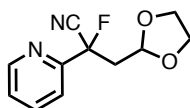

### 3-(1,3-Dioxolan-2-yl)-2-fluoro-2-(pyridin-2-yl)propanenitrile (2O)

Purification by PTLC (hexane/EtOAc = 4:1) afforded **2O** (20.4 mg, 46% yield) as a yellow oil.  $^1\text{H}$  NMR (400 MHz,  $\text{CDCl}_3$ )  $\delta$  8.67 (dd,  $J = 4.8, 1.6$  Hz, 1H), 7.84 (td,  $J = 7.6, 1.6$  Hz, 1H), 7.64 (dd,  $J = 7.6, 1.2$  Hz, 1H), 7.38 (dd,  $J = 7.6, 4.8$  Hz, 1H), 5.20 (t,  $J = 4.8$  Hz, 1H), 4.04–3.97 (m, 2H), 3.92–3.84 (m, 2H), 2.88–2.64 (m, 2H);  $^{13}\text{C}$  NMR (101 MHz,  $\text{CDCl}_3$ )  $\delta$  154.2 (d,  $J_{\text{C-F}} = 27.0$  Hz), 149.6, 137.6, 124.6, 119.4 (d,  $J_{\text{C-F}} = 6.8$  Hz), 116.3 (d,  $J_{\text{C-F}} = 33.6$  Hz), 100.1 (d,  $J_{\text{C-F}} = 2.9$  Hz), 89.1 (d,  $J_{\text{C-F}} = 185.8$  Hz), 65.0 (d,  $J_{\text{C-F}} = 3.9$  Hz), 43.2 (d,  $J_{\text{C-F}} = 22.1$  Hz);  $^{19}\text{F}$  NMR (376 MHz,  $\text{CDCl}_3$ )  $\delta$  -153.7 (dd,  $J_{\text{F-H}} = 29.0, 17.3$  Hz); HRMS (ESI)  $m/z$  calcd for  $\text{C}_{11}\text{H}_{12}\text{FN}_2\text{O}_2$   $[\text{M}+\text{H}]^+$ : 223.0877 found 223.0878.

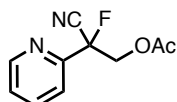

### 2-Cyano-2-fluoro-2-(pyridin-2-yl)ethyl acetate (2P)

Purification by PTLC (hexane/EtOAc = 4:1) afforded **2P** (37.5 mg, 90% yield) as a colorless oil.  $^1\text{H}$  NMR (400 MHz,  $\text{CDCl}_3$ )  $\delta$  8.68 (dd,  $J = 4.8, 1.2$  Hz, 1H), 7.87 (td,  $J = 7.6, 1.2$  Hz, 1H), 7.65 (d,  $J = 7.6$  Hz, 1H), 7.43 (dd,  $J = 7.6, 4.8$  Hz, 1H), 4.79 (dd,  $J_{\text{H-F}} = 44.8$  Hz,  $J = 12.8$  Hz, 1H), 4.74 (dd,  $J_{\text{H-F}} = 34.4$  Hz,  $J = 12.8$  Hz, 1H), 2.16 (s, 3H);  $^{13}\text{C}$  NMR (101 MHz,  $\text{CDCl}_3$ )  $\delta$  169.7, 151.2 (d,  $J_{\text{C-F}} = 26.1$  Hz), 149.8, 137.7, 125.2, 120.2 (d,  $J_{\text{C-F}} = 5.8$  Hz), 114.8 (d,  $J_{\text{C-F}} = 33.7$  Hz), 89.7 (d,  $J_{\text{C-F}} = 190.7$  Hz), 66.2 (d,  $J_{\text{C-F}} = 23.0$  Hz), 20.5;  $^{19}\text{F}$  NMR (376 MHz,  $\text{CDCl}_3$ )  $\delta$  -160.8 (dd,  $J_{\text{F-H}} = 25.8, 14.5$  Hz); HRMS (ESI)  $m/z$  calcd for  $\text{C}_{10}\text{H}_9\text{FN}_2\text{O}_2$   $[\text{M}+\text{H}]^+$ : 209.0721 found 209.0720.

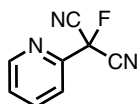

### 2-Fluoro-2-(pyridin-2-yl)malononitrile (2Q)

Purification by filtration afforded **2S** (27.4 mg, 85% yield) as a yellow oil.  $^1\text{H}$  NMR (400 MHz,  $\text{CDCl}_3$ )  $\delta$  8.80 (d,  $J = 4.8$  Hz, 1H), 7.99 (td,  $J = 7.6, 1.6$  Hz, 1H), 7.79 (d,  $J = 7.6$  Hz, 1H), 7.61–7.56 (m, 1H);  $^{13}\text{C}$  NMR (101 MHz,  $\text{CDCl}_3$ )  $\delta$  150.7, 148.0 (d,  $J_{\text{C-F}} = 25.0$  Hz), 138.6, 127.0, 120.8 (d,  $J_{\text{C-F}} = 2.9$  Hz), 110.6 (d,  $J_{\text{C-F}} = 35.6$  Hz), 78.7 (d,  $J_{\text{C-F}} = 196.4$  Hz);  $^{19}\text{F}$  NMR (376 MHz,  $\text{CDCl}_3$ )  $\delta$  -138.0.

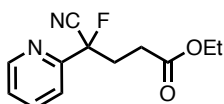

### Ethyl 4-cyano-4-fluoro-4-(pyridin-2-yl)butanoate (2R)

Purification by filtration with chloroform afforded **2R** (41.6 mg, 88% yield) as a colorless oil.  $^1\text{H}$  NMR (400 MHz,  $\text{CDCl}_3$ )  $\delta$  8.67 (d,  $J = 5.6$  Hz, 1H), 7.84 (td,  $J = 7.6, 1.6$  Hz, 1H), 7.58 (d,  $J = 7.6$  Hz, 1H), 7.38 (dd,  $J = 7.6, 5.6$  Hz, 1H), 4.14 (q,  $J = 7.2$  Hz, 2H), 2.83–2.53 (m, 4H), 1.26 (t,  $J = 7.2$  Hz, 3H);  $^{13}\text{C}$  NMR (101 MHz,  $\text{CDCl}_3$ )  $\delta$  171.3, 153.9 (d,  $J_{\text{C-F}} = 26.1$  Hz), 149.7, 137.6, 124.7, 119.4 (d,  $J_{\text{C-F}} = 6.8$  Hz), 116.3 (d,  $J_{\text{C-F}} = 33.7$  Hz), 91.2 (d,  $J_{\text{C-F}} = 186.9$  Hz), 60.9, 34.8 (d,  $J_{\text{C-F}} = 23.1$  Hz), 28.5 (d,  $J_{\text{C-F}} = 3.8$  Hz), 14.1;  $^{19}\text{F}$  NMR (376 MHz,  $\text{CDCl}_3$ )  $\delta$  -156.3 (t,  $J_{\text{F-H}} = 20.4$  Hz); HRMS (ESI)  $m/z$  calcd for  $\text{C}_{12}\text{H}_{13}\text{FN}_2\text{O}_2\text{Na}$   $[\text{M}+\text{Na}]^+$ : 259.0853 found 259.0852.

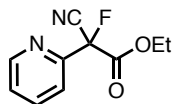

### Ethyl 2-cyano-2-fluoro-2-(pyridin-2-yl)acetate (2S)

Purification by filtration with chloroform afforded **2S** (40.4 mg, 97% yield) as a colorless oil.  $^1\text{H}$  NMR (400 MHz,  $\text{CDCl}_3$ )  $\delta$  8.68 (d,  $J = 5.2$  Hz, 1H), 7.91 (td,  $J = 7.6, 1.6$  Hz, 1H), 7.73 (d,  $J = 7.6$  Hz, 1H), 7.48 (dd,  $J = 7.6, 5.2$  Hz, 1H), 4.50–4.30 (m, 2H), 1.33 (t,  $J = 6.8$  Hz, 3H);  $^{13}\text{C}$  NMR (101 MHz,  $\text{CDCl}_3$ )  $\delta$  162.0 (d,  $J_{\text{C-F}} = 28.0$  Hz), 150.6 (d,  $J_{\text{C-F}} = 26.2$  Hz), 149.8, 137.9, 125.7, 120.8 (d,  $J_{\text{C-F}} = 3.8$  Hz), 113.5 (d,  $J_{\text{C-F}} = 32.9$  Hz), 87.5 (d,  $J_{\text{C-F}} = 199.4$  Hz), 64.4, 13.7;  $^{19}\text{F}$  NMR (376 MHz,  $\text{CDCl}_3$ )  $\delta$  -148.0; HRMS (ESI)  $m/z$  calcd for  $\text{C}_{10}\text{H}_9\text{FN}_2\text{O}_2\text{Na}$   $[\text{M}+\text{Na}]^+$ : 231.0540 found 231.0539.

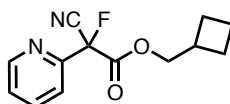

### Cyclobutylmethyl 2-cyano-2-fluoro-2-(pyridin-2-yl)acetate (2T)

Purification by filtration with chloroform afforded **2T** (46.2 mg, 93% yield) as a yellow oil.  $^1\text{H}$  NMR (400 MHz,  $\text{CDCl}_3$ )  $\delta$  8.68 (d,  $J = 4.4$  Hz, 1H), 7.89 (td,  $J = 8.0, 1.2$  Hz, 1H), 7.73 (d,  $J = 8.0$  Hz, 1H),

7.51–7.40 (m, 1H), 4.31 (d,  $J = 6.4$  Hz, 2H), 2.73–2.60 (m, 1H), 2.09–1.66 (m, 6H);  $^{13}\text{C}$  NMR (101 MHz,  $\text{CDCl}_3$ )  $\delta$  162.2 (d,  $J_{\text{C-F}} = 27.9$  Hz), 150.8 (d,  $J_{\text{C-F}} = 25.0$  Hz), 149.9, 137.9, 125.7, 120.9 (d,  $J_{\text{C-F}} = 3.8$  Hz), 113.5 (d,  $J_{\text{C-F}} = 33.6$  Hz), 87.6 (d,  $J_{\text{C-F}} = 197.3$  Hz), 71.5, 33.6, 24.3, 18.2;  $^{19}\text{F}$  NMR (376 MHz,  $\text{CDCl}_3$ )  $\delta$  -148.0; HRMS (ESI)  $m/z$  calcd for  $\text{C}_{13}\text{H}_{14}\text{FN}_2\text{O}_2$   $[\text{M}+\text{H}]^+$ : 249.1034 found 249.1033.

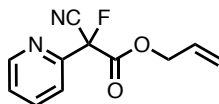

#### Allyl 2-cyano-2-fluoro-2-(pyridin-2-yl)acetate (**2U**)

Purification by PTLC (hexane/EtOAc = 8:1) afforded **2U** (39.6 mg, 90% yield) as a colorless oil.  $^1\text{H}$  NMR (400 MHz,  $\text{CDCl}_3$ )  $\delta$  8.70 (d,  $J = 4.8$  Hz, 1H), 7.89 (td,  $J = 7.6, 2.0$  Hz, 1H), 7.27 (dt,  $J = 7.6, 1.2$  Hz, 1H), 7.48–7.44 (m, 1H), 5.95–5.84 (m, 1H), 5.40–5.28 (m, 2H), 4.88–4.77 (m, 2H);  $^{13}\text{C}$  NMR (101 MHz,  $\text{CDCl}_3$ )  $\delta$  161.8 (d,  $J_{\text{C-F}} = 28.9$  Hz), 150.6 (d,  $J_{\text{C-F}} = 26.1$  Hz), 149.9, 137.9, 129.9, 125.8, 120.9 (d,  $J_{\text{C-F}} = 4.8$  Hz), 120.1, 113.4 (d,  $J_{\text{C-F}} = 32.8$  Hz), 87.5 (d,  $J_{\text{C-F}} = 197.4$  Hz), 68.3;  $^{19}\text{F}$  NMR (376 MHz,  $\text{CDCl}_3$ )  $\delta$  -148.0; HRMS (ESI)  $m/z$  calcd for  $\text{C}_{11}\text{H}_{10}\text{FN}_2\text{O}_2$   $[\text{M}+\text{H}]^+$ : 221.0721 found 221.0720.

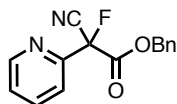

#### Benzyl 2-cyano-2-fluoro-2-(pyridin-2-yl)acetate (**2V**)

Purification by filtration with chloroform afforded **2V** (44.9 mg, 83% yield) as a yellow oil.  $^1\text{H}$  NMR (400 MHz,  $\text{CDCl}_3$ )  $\delta$  8.66 (d,  $J = 4.8$  Hz, 1H), 7.86 (td,  $J = 7.6, 1.2$  Hz, 1H), 7.69 (d,  $J = 8.4$  Hz, 1H), 7.46–7.42 (m, 1H), 7.36–7.29 (m, 5H), 5.36 (s, 2H);  $^{13}\text{C}$  NMR (101 MHz,  $\text{CDCl}_3$ )  $\delta$  161.9 (d,  $J_{\text{C-F}} = 27.9$  Hz), 150.5 (d,  $J_{\text{C-F}} = 25.0$  Hz), 149.8, 137.9, 133.7, 128.8, 128.6, 128.2, 125.7, 121.0 (d,  $J_{\text{C-F}} = 3.8$  Hz), 113.3 (d,  $J_{\text{C-F}} = 32.7$  Hz), 87.6 (d,  $J_{\text{C-F}} = 197.4$  Hz), 69.5;  $^{19}\text{F}$  NMR (376 MHz,  $\text{CDCl}_3$ )  $\delta$  -148.2; HRMS (ESI)  $m/z$  calcd for  $\text{C}_{15}\text{H}_{12}\text{FN}_2\text{O}_2$   $[\text{M}+\text{H}]^+$ : 271.0877 found 271.0877.

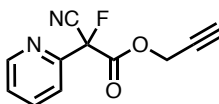

#### Prop-2-yn-1-yl 2-cyano-2-fluoro-2-(pyridin-2-yl)acetate (**2W**)

Purification by filtration with chloroform afforded **2W** (43.6 mg, quant.) as a yellow oil.  $^1\text{H}$  NMR (400 MHz,  $\text{CDCl}_3$ )  $\delta$  8.69 (dd,  $J = 4.8, 1.2$  Hz, 1H), 7.90 (td,  $J = 7.6, 1.2$  Hz, 1H), 7.75 (dt,  $J = 7.6, 0.8$  Hz, 1H), 7.50–7.44 (m, 1H), 4.91 (dd,  $J = 2.0, 0.8$  Hz, 2H), 2.56 (t,  $J = 2.4$  Hz, 1H);  $^{13}\text{C}$  NMR (101 MHz,  $\text{CDCl}_3$ )  $\delta$  161.4 (d,  $J_{\text{C-F}} = 28.9$  Hz), 150.3 (d,  $J_{\text{C-F}} = 25.0$  Hz), 150.0, 138.0, 125.9, 121.1 (d,  $J_{\text{C-F}} = 3.8$  Hz), 113.1 (d,  $J_{\text{C-F}} = 32.7$  Hz), 87.4 (d,  $J_{\text{C-F}} = 199.4$  Hz), 76.9, 75.3, 55.2;  $^{19}\text{F}$  NMR (376 MHz,  $\text{CDCl}_3$ )  $\delta$  -147.5; HRMS (ESI)  $m/z$  calcd for  $\text{C}_{11}\text{H}_8\text{FN}_2\text{O}_2$   $[\text{M}+\text{H}]^+$ : 219.0564 found 219.0564.

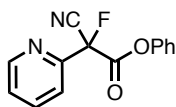

### Phenyl 2-cyano-2-fluoro-2-(pyridin-2-yl)acetate (**2X**)

Purification by filtration with chloroform afforded **2X** (42.5 mg, 83% yield) as a yellow oil.  $^1\text{H}$  NMR (400 MHz,  $\text{CDCl}_3$ )  $\delta$  8.75 (d,  $J = 4.0$  Hz, 1H), 7.95 (td,  $J = 7.2, 1.6$  Hz, 1H), 7.85 (dd,  $J = 7.2, 0.8$  Hz, 1H), 7.53–7.49 (m, 1H), 7.41 (t,  $J = 8.0$  Hz, 2H), 7.30 (t,  $J = 8.0$  Hz, 1H), 7.19 (d,  $J = 8.0$  Hz, 2H);  $^{13}\text{C}$  NMR (101 MHz,  $\text{CDCl}_3$ )  $\delta$  160.6 (d,  $J_{\text{C-F}} = 28.2$  Hz), 150.6 (d,  $J_{\text{C-F}} = 25.3$  Hz), 150.1 (d,  $J_{\text{C-F}} = 4.8$  Hz), 149.9, 138.2, 129.7, 127.0, 126.0, 121.4 (d,  $J_{\text{C-F}} = 2.8$  Hz), 120.7 (d,  $J_{\text{C-F}} = 11.6$  Hz), 113.3 (d,  $J_{\text{C-F}} = 33.9$  Hz), 87.4 (d,  $J_{\text{C-F}} = 198.8$  Hz);  $^{19}\text{F}$  NMR (376 MHz,  $\text{CDCl}_3$ )  $\delta$  -146.5; HRMS (ESI)  $m/z$  calcd for  $\text{C}_{14}\text{H}_{10}\text{FN}_2\text{O}_2$   $[\text{M}+\text{H}]^+$ : 257.0721 found 257.0719.

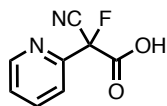

### 2-Cyano-2-fluoro-2-(pyridin-2-yl)acetic acid (**2Y**)

The reaction was conducted with Selectfluor<sup>®</sup> (5.0 equiv) at 50 °C. After the reaction, the solution was concentrated *in vacuo*. To the crude material containing **2Y** was added EtOH (1.0 mL). The mixture was stirred with refluxing for 24 h. After cooling the reaction mixture to room temperature, the reaction was quenched with  $\text{NaHCO}_3$  aq. The mixture was extracted with EtOAc and washed with brine. The combined organic layer was dried over  $\text{Na}_2\text{SO}_4$ , filtered, and concentrated *in vacuo*. The residue was purified by Isolera<sup>®</sup> (hexane/EtOAc = 19:1 to 9:1) to afford **2S** (11.8 mg, 31% yield) as a colorless oil.

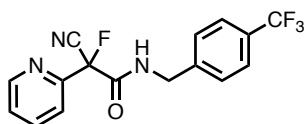

### 2-Cyano-2-fluoro-2-(pyridin-2-yl)-N-(4-(trifluoromethyl)benzyl)acetamide (**2Z**)

The reaction was performed at -30 °C. Purification by PTLC (chloroform/EtOAc = 10:1) afforded **2Z** (26.3 mg, 39% yield) as a white solid.  $^1\text{H}$  NMR (400 MHz,  $\text{CDCl}_3$ )  $\delta$  8.68 (d,  $J = 4.4$  Hz, 1H), 7.90 (td,  $J = 8.0, 1.6$  Hz, 1H), 7.79 (d,  $J = 8.0$  Hz, 1H), 7.60 (d,  $J = 8.0$  Hz, 2H), 7.48 (ddd,  $J = 8.0, 4.4, 1.6$  Hz, 1H), 7.40 (d,  $J = 8.0$  Hz, 2H), 7.32 (brs, 1H), 4.72–4.53 (m, 2H);  $^{13}\text{C}$  NMR (101 MHz,  $\text{CDCl}_3$ )  $\delta$  161.9 (d,  $J_{\text{C-F}} = 24.2$  Hz), 150.6 (d,  $J_{\text{C-F}} = 24.2$  Hz), 150.0, 140.6, 138.1, 130.1 (q,  $J_{\text{C-F}} = 32.9$  Hz), 127.8, 125.8, 123.9 (q,  $J_{\text{C-F}} = 273.5$  Hz), 114.0 (d,  $J_{\text{C-F}} = 33.0$  Hz), 88.1 (d,  $J_{\text{C-F}} = 202.7$  Hz), 43.5;  $^{19}\text{F}$  NMR (376 MHz,  $\text{CDCl}_3$ )  $\delta$  -62.7, -150.3; HRMS (ESI)  $m/z$  calcd for  $\text{C}_{16}\text{H}_{12}\text{F}_4\text{N}_3\text{O}$   $[\text{M}+\text{H}]^+$ : 338.0911 found 338.0911.

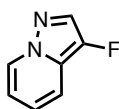

### 3-Fluoropyrazolo[1,5-*a*]pyridine (**2Z'**)

Purification by PTLC (chloroform/EtOAc = 10:1) afforded **2Z'** as a white solid.  $^1\text{H}$  NMR (400 MHz,  $\text{CDCl}_3$ )  $\delta$  8.28 (dd,  $J = 7.2, 1.2$  Hz, 1H), 7.80 (d,  $J_{\text{H-F}} = 3.6$  Hz, 1H), 7.51 (dt,  $J = 8.8, 1.2$  Hz, 1H), 7.07 (dd,  $J = 8.8, 6.8$  Hz, 1H), 6.71 (td,  $J = 6.8, 1.2$  Hz, 1H);  $^{13}\text{C}$  NMR (101 MHz,  $\text{CDCl}_3$ )  $\delta$  140.5 (d,  $J_{\text{C-F}} = 244.3$  Hz), 128.3, 127.5, 127.4 (d,  $J_{\text{C-F}} = 11.6$  Hz), 122.2 (d,  $J_{\text{C-F}} = 1.9$  Hz), 115.2 (d,  $J_{\text{C-F}} = 4.9$  Hz), 111.8;  $^{19}\text{F}$  NMR (376 MHz,  $\text{CDCl}_3$ )  $\delta$  -183.9; HRMS (ESI)  $m/z$  calcd for  $\text{C}_7\text{H}_6\text{FN}_2$   $[\text{M}+\text{H}]^+$ : 137.0510 found 137.0509.

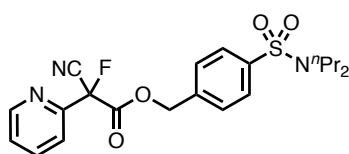

### 4-(*N,N*-Dipropylsulfamoyl)benzyl 2-cyano-2-fluoro-2-(pyridin-2-yl)acetate (**2AA**)

Purification by PTLC (hexane/EtOAc = 4:1) afforded **2AA** (85.8 mg, 99% yield) as a colorless oil.  $^1\text{H}$  NMR (400 MHz,  $\text{CDCl}_3$ )  $\delta$  8.65 (dd,  $J = 4.8, 1.2$  Hz, 1H), 7.90 (td,  $J = 8.0, 1.2$  Hz, 1H), 7.78 (d,  $J = 8.8$  Hz, 2H), 7.73 (d,  $J = 8.0$  Hz, 1H), 7.49–7.43 (m, 3H), 5.42 (s, 2H), 3.07 (t,  $J = 7.6$  Hz, 4H), 1.61–1.51 (m, 4H), 0.87 (t,  $J = 7.6$  Hz, 6H);  $^{13}\text{C}$  NMR (101 MHz,  $\text{CDCl}_3$ )  $\delta$  161.8 (d,  $J_{\text{C-F}} = 28.9$  Hz), 150.4 (d,  $J_{\text{C-F}} = 26.1$  Hz), 149.9, 140.6, 138.1, 128.2, 127.4, 125.9, 121.1 (d,  $J_{\text{C-F}} = 3.8$  Hz), 113.3 (d,  $J_{\text{C-F}} = 33.7$  Hz), 87.4 (d,  $J_{\text{C-F}} = 198.4$  Hz), 68.2, 50.1, 22.0, 11.1;  $^{19}\text{F}$  NMR (376 MHz,  $\text{CDCl}_3$ )  $\delta$  -147.9; HRMS (ESI)  $m/z$  calcd for  $\text{C}_{21}\text{H}_{25}\text{FN}_3\text{O}_4\text{S}$   $[\text{M}+\text{H}]^+$ : 434.1544 found 434.1545.

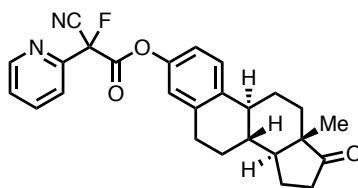

### (*8R,9S,13S,14S*)-13-Methyl-17-oxo-7,8,9,11,12,13,14,15,16,17-decahydro-6*H*-cyclopenta[*a*]phenanthren-3-yl 2-cyano-2-fluoro-2-(pyridin-2-yl)acetate (**2AB**)

Purification by PTLC (hexane/EtOAc = 4:1) afforded **2AB** (63.1 mg, 73% yield) as a white solid.  $^1\text{H}$  NMR (400 MHz,  $\text{CDCl}_3$ )  $\delta$  8.74 (d,  $J = 4.4$  Hz, 1H), 7.94 (td,  $J = 7.6, 2.0$  Hz, 1H), 7.83 (d,  $J = 7.6$  Hz, 1H), 7.54–7.48 (m, 1H), 7.30 (d,  $J = 8.4$  Hz, 1H), 6.94 (d,  $J = 8.4$  Hz, 1H), 6.91 (s, 1H), 2.91 (dd,  $J = 8.8, 4.0$  Hz, 2H), 2.56–2.46 (m, 1H), 2.43–2.36 (m, 1H), 2.33–2.23 (m, 1H), 2.20–1.90 (m, 4H), 1.75–1.48 (m, 6H), 0.91 (s, 3H);  $^{13}\text{C}$  NMR (101 MHz,  $\text{CDCl}_3$ )  $\delta$  220.6, 160.8 (d,  $J_{\text{C-F}} = 29.1$  Hz), 150.6 (d,  $J_{\text{C-F}} = 25.1$  Hz), 150.0, 147.8, 138.6, 138.5, 138.1, 126.6, 125.9, 121.3 (d,  $J_{\text{C-F}} = 3.9$  Hz), 120.6, 117.7, 113.3 (d,  $J_{\text{C-F}} = 33.9$  Hz), 87.4 (d,  $J_{\text{C-F}} = 198.8$  Hz), 50.3, 47.8, 44.0, 37.8, 35.8, 31.4, 29.3, 26.1, 25.7,

21.5, 13.8;  $^{19}\text{F}$  NMR (376 MHz,  $\text{CDCl}_3$ )  $\delta$  -146.4; HRMS (ESI)  $m/z$  calcd for  $\text{C}_{26}\text{H}_{26}\text{FN}_2\text{O}_3$   $[\text{M}+\text{H}]^+$ : 433.1922 found 433.1920.

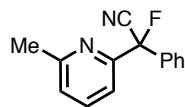

### 2-Fluoro-2-(6-methylpyridin-2-yl)-2-phenylacetonitrile (2AC)

The reaction was performed with  $\text{NaClO}_4$  (1.0 equiv). Purification by PTLC (hexane/EtOAc = 4:1) afforded **2AC** (39.4 mg, 87% yield) as a colorless oil.  $^1\text{H}$  NMR (400 MHz,  $\text{CDCl}_3$ )  $\delta$  7.67 (t,  $J$  = 8.0 Hz, 1H), 7.60–7.53 (m, 2H), 7.45–7.39 (m, 3H), 7.35 (d,  $J$  = 8.0 Hz, 1H), 7.19 (d,  $J$  = 8.0 Hz, 1H), 2.58 (s, 3H);  $^{13}\text{C}$  NMR (101 MHz,  $\text{CDCl}_3$ )  $\delta$  159.1, 154.3 (d,  $J_{\text{C-F}}$  = 28.1 Hz), 137.4, 136.1 (d,  $J_{\text{C-F}}$  = 24.3 Hz), 130.1, 128.8, 125.9 (d,  $J_{\text{C-F}}$  = 5.9 Hz), 124.1, 116.9 (d,  $J_{\text{C-F}}$  = 33.9 Hz), 116.5 (d,  $J_{\text{C-F}}$  = 5.8 Hz), 92.1 (d,  $J_{\text{C-F}}$  = 186.2 Hz), 24.4;  $^{19}\text{F}$  NMR (376 MHz,  $\text{CDCl}_3$ )  $\delta$  -141.7; HRMS (ESI)  $m/z$  calcd for  $\text{C}_{14}\text{H}_{12}\text{FN}_2$   $[\text{M}+\text{H}]^+$ : 227.0979 found 227.0977.

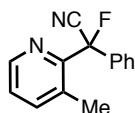

### 2-Fluoro-2-(3-methylpyridin-2-yl)-2-phenylacetonitrile (2AD)

Purification by PTLC (hexane/EtOAc = 4:1) afforded **2AD** (39.6 mg, 88% yield) as a colorless oil.  $^1\text{H}$  NMR (400 MHz,  $\text{CDCl}_3$ )  $\delta$  8.57 (d,  $J$  = 5.2 Hz, 1H), 7.56 (dd,  $J$  = 7.6, 0.8 Hz, 1H), 7.46–7.39 (m, 5H), 7.33 (dd,  $J$  = 7.6, 5.2 Hz, 1H), 2.18 (d,  $J_{\text{H-F}}$  = 3.6 Hz, 3H);  $^{13}\text{C}$  NMR (101 MHz,  $\text{CDCl}_3$ )  $\delta$  151.9 (d,  $J_{\text{C-F}}$  = 25.1 Hz), 146.1, 140.8, 135.7 (d,  $J_{\text{C-F}}$  = 24.2 Hz), 132.5, 130.0, 128.9, 125.5 (d,  $J_{\text{C-F}}$  = 5.9 Hz), 124.8, 116.9 (d,  $J_{\text{C-F}}$  = 34.9 Hz), 94.7 (d,  $J_{\text{C-F}}$  = 187.3 Hz), 18.5 (d,  $J_{\text{C-F}}$  = 5.9 Hz);  $^{19}\text{F}$  NMR (376 MHz,  $\text{CDCl}_3$ )  $\delta$  -143.5; HRMS (ESI)  $m/z$  calcd for  $\text{C}_{14}\text{H}_{12}\text{FN}_2$   $[\text{M}+\text{H}]^+$ : 227.0979 found 227.0978.

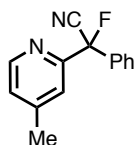

### 2-Fluoro-2-(4-methylpyridin-2-yl)-2-phenylacetonitrile (2AE)

The reaction was performed with  $\text{NaClO}_4$  (1.0 equiv). Purification by PTLC (hexane/EtOAc = 4:1) afforded **2AE** (15.4 mg, 34% yield) as a colorless oil.  $^1\text{H}$  NMR (400 MHz,  $\text{CDCl}_3$ )  $\delta$  8.51 (d,  $J$  = 4.8 Hz, 1H), 7.59–7.53 (m, 2H), 7.46–7.40 (m, 4H), 7.16 (d,  $J$  = 4.8 Hz, 1H), 2.42 (s, 3H);  $^{13}\text{C}$  NMR (101 MHz,  $\text{CDCl}_3$ )  $\delta$  155.0 (d,  $J_{\text{C-F}}$  = 28.1 Hz), 149.5, 149.1, 136.0 (d,  $J_{\text{C-F}}$  = 24.2 Hz), 130.2, 128.9, 125.8 (d,  $J_{\text{C-F}}$  = 5.9 Hz), 125.4, 120.4 (d,  $J_{\text{C-F}}$  = 5.8 Hz), 116.8 (d,  $J_{\text{C-F}}$  = 33.9 Hz), 92.0 (d,  $J_{\text{C-F}}$  = 187.3 Hz), 21.3;  $^{19}\text{F}$  NMR (376 MHz,  $\text{CDCl}_3$ )  $\delta$  -142.2; HRMS (ESI)  $m/z$  calcd for  $\text{C}_{14}\text{H}_{12}\text{FN}_2$   $[\text{M}+\text{H}]^+$ : 227.0979 found 227.0977.

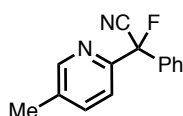

### 2-Fluoro-2-(5-methylpyridin-2-yl)-2-phenylacetonitrile (2AF)

Purification by PTLC (hexane/EtOAc = 4:1) afforded **2AF** (31.4 mg, 69% yield) as a colorless oil.  $^1\text{H}$  NMR (400 MHz,  $\text{CDCl}_3$ )  $\delta$  8.49 (s, 1H), 7.61 (dd,  $J = 8.0, 1.6$  Hz, 1H), 7.59–7.52 (m, 2H), 7.47 (d,  $J = 8.0$  Hz, 1H), 7.45–7.38 (m, 3H), 2.38 (s, 3H);  $^{13}\text{C}$  NMR (101 MHz,  $\text{CDCl}_3$ )  $\delta$  152.4 (d,  $J_{\text{C-F}} = 29.1$  Hz), 150.2, 137.9, 136.1 (d,  $J_{\text{C-F}} = 24.2$  Hz), 134.6, 130.1 (d,  $J_{\text{C-F}} = 1.9$  Hz), 128.9, 125.8 (d,  $J_{\text{C-F}} = 5.8$  Hz), 119.3 (d,  $J_{\text{C-F}} = 5.8$  Hz), 116.8 (d,  $J_{\text{C-F}} = 33.9$  Hz), 92.0 (d,  $J_{\text{C-F}} = 186.1$  Hz), 18.2;  $^{19}\text{F}$  NMR (376 MHz,  $\text{CDCl}_3$ )  $\delta$  -141.0; HRMS (ESI)  $m/z$  calcd for  $\text{C}_{14}\text{H}_{12}\text{FN}_2$   $[\text{M}+\text{H}]^+$ : 227.0979 found 227.0977.

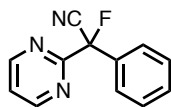

### 2-Fluoro-2-phenyl-2-(pyrimidin-2-yl)acetonitrile (2AG)

Purification by PTLC (chloroform/EtOAc = 19:1) afforded **2AG** (41.3 mg, 97% yield) as a white solid.  $^1\text{H}$  NMR (400 MHz,  $\text{CDCl}_3$ )  $\delta$  8.86 (d,  $J = 4.8$  Hz, 2H), 7.71–7.66 (m, 2H), 7.47–7.39 (m, 3H), 7.37 (t,  $J = 4.8$  Hz, 1H);  $^{13}\text{C}$  NMR (101 MHz,  $\text{CDCl}_3$ )  $\delta$  163.4 (d,  $J_{\text{C-F}} = 24.0$  Hz), 158.0, 134.8 (d,  $J_{\text{C-F}} = 24.1$  Hz), 130.4, 128.9, 125.5 (d,  $J_{\text{C-F}} = 5.8$  Hz), 121.5, 116.2 (d,  $J_{\text{C-F}} = 32.7$  Hz), 91.3 (d,  $J_{\text{C-F}} = 191.7$  Hz);  $^{19}\text{F}$  NMR (376 MHz,  $\text{CDCl}_3$ )  $\delta$  -144.5; HRMS (ESI)  $m/z$  calcd for  $\text{C}_{12}\text{H}_9\text{FN}_3$   $[\text{M}+\text{H}]^+$ : 214.0775 found 214.0776.

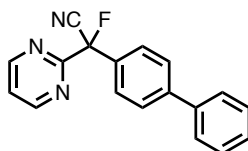

### 2-([1,1'-Biphenyl]-4-yl)-2-fluoro-2-(pyrimidin-2-yl)acetonitrile (2AH)

Purification by PTLC (chloroform/EtOAc = 19:1) afforded **2AH** (50.3 mg, 87% yield) as a white solid.  $^1\text{H}$  NMR (400 MHz,  $\text{CDCl}_3$ )  $\delta$  8.88 (d,  $J = 5.2$  Hz, 2H), 7.75 (d,  $J = 8.4$  Hz, 2H), 7.65 (d,  $J = 8.4$  Hz, 2H), 7.56 (d,  $J = 7.2$  Hz, 2H), 7.45 (t,  $J = 7.2$  Hz, 2H), 7.40–7.36 (m, 2H);  $^{13}\text{C}$  NMR (101 MHz,  $\text{CDCl}_3$ )  $\delta$  163.5 (d,  $J_{\text{C-F}} = 26.2$  Hz), 158.1, 143.4, 139.8, 133.7 (d,  $J_{\text{C-F}} = 24.2$  Hz), 128.9, 128.0, 127.7, 127.2, 126.1 (d,  $J_{\text{C-F}} = 5.9$  Hz), 121.6, 116.2 (d,  $J_{\text{C-F}} = 32.9$  Hz), 91.2 (d,  $J_{\text{C-F}} = 193.0$  Hz);  $^{19}\text{F}$  NMR (376 MHz,  $\text{CDCl}_3$ )  $\delta$  -143.8; HRMS (ESI)  $m/z$  calcd for  $\text{C}_{18}\text{H}_{13}\text{FN}_3$   $[\text{M}+\text{H}]^+$ : 290.1088 found 290.1087.

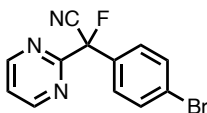

### 2-(4-Bromophenyl)-2-fluoro-2-(pyrimidin-2-yl)acetonitrile (2AI)

Purification by PTLC (chloroform/EtOAc = 19:1) afforded **2AI** (50.3 mg, 86% yield) as a white solid.  $^1\text{H}$  NMR (400 MHz,  $\text{CDCl}_3$ )  $\delta$  8.85 (d,  $J = 4.8$  Hz, 1H), 7.62–7.53 (m, 4H), 7.39 (t,  $J = 4.8$  Hz, 1H);  $^{13}\text{C}$  NMR (101 MHz,  $\text{CDCl}_3$ )  $\delta$  163.0 (d,  $J_{\text{C-F}} = 25.3$  Hz), 158.1, 133.9 (d,  $J_{\text{C-F}} = 25.3$  Hz), 132.2, 127.2 (d,  $J_{\text{C-F}} = 5.9$  Hz), 125.0, 121.7, 115.8 (d,  $J_{\text{C-F}} = 32.0$  Hz), 90.9 (d,  $J_{\text{C-F}} = 194.0$  Hz);  $^{19}\text{F}$  NMR (376 MHz,  $\text{CDCl}_3$ )  $\delta$  -144.8; HRMS (ESI)  $m/z$  calcd for  $\text{C}_{12}\text{H}_7\text{BrN}_3$   $[\text{M-F}]^+$ : 271.9818 found 271.9816.

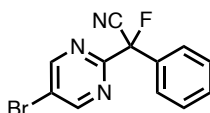

### 2-(5-Bromopyrimidin-2-yl)-2-fluoro-2-phenylacetonitrile (2AJ)

Purification by PTLC (chloroform/EtOAc = 19:1) afforded **2AJ** (58.4 mg, quant.) as a white solid.  $^1\text{H}$  NMR (400 MHz,  $\text{CDCl}_3$ )  $\delta$  8.89 (s, 2H), 7.71–7.62 (m, 2H), 7.47–7.44 (m, 3H);  $^{13}\text{C}$  NMR (101 MHz,  $\text{CDCl}_3$ )  $\delta$  161.5 (d,  $J_{\text{C-F}} = 26.3$  Hz), 158.8, 134.5 (d,  $J_{\text{C-F}} = 25.3$  Hz), 130.6, 129.0, 125.5 (d,  $J_{\text{C-F}} = 5.9$  Hz), 121.1, 115.8 (d,  $J_{\text{C-F}} = 32.0$  Hz), 90.9 (d,  $J_{\text{C-F}} = 193.9$  Hz);  $^{19}\text{F}$  NMR (376 MHz,  $\text{CDCl}_3$ )  $\delta$  -144.2; HRMS (ESI)  $m/z$  calcd for  $\text{C}_{12}\text{H}_7\text{BrN}_3$   $[\text{M-F}]^+$ : 271.9818 found 271.9817.

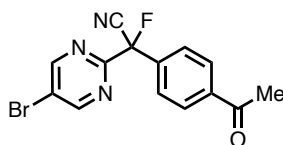

### 2-(4-Acetylphenyl)-2-(5-bromopyrimidin-2-yl)-2-fluoroacetonitrile (2AK)

Purification by PTLC (chloroform/EtOAc = 19:1) afforded **2AK** (59.5 mg, 89% yield) as a white solid.  $^1\text{H}$  NMR (400 MHz,  $\text{CDCl}_3$ )  $\delta$  8.89 (s, 2H), 8.03 (d,  $J = 8.0$  Hz, 2H), 8.03 (d,  $J = 8.0$  Hz, 2H), 2.62 (s, 3H);  $^{13}\text{C}$  NMR (101 MHz,  $\text{CDCl}_3$ )  $\delta$  196.9, 160.8 (d,  $J_{\text{C-F}} = 25.0$  Hz), 158.9, 138.6 (d,  $J_{\text{C-F}} = 25.0$  Hz), 138.5, 128.9, 125.7 (d,  $J_{\text{C-F}} = 5.8$  Hz), 121.4, 115.3 (d,  $J_{\text{C-F}} = 31.8$  Hz), 90.5 (d,  $J_{\text{C-F}} = 194.5$  Hz), 26.7;  $^{19}\text{F}$  NMR (376 MHz,  $\text{CDCl}_3$ )  $\delta$  -146.1; HRMS (ESI)  $m/z$  calcd for  $\text{C}_{14}\text{H}_9\text{BrN}_3\text{O}$   $[\text{M-F}]^+$ : 313.9924 found 313.9922.

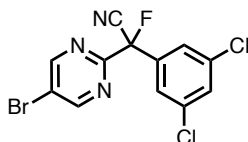

### 2-(5-Bromopyrimidin-2-yl)-2-(3,5-dichlorophenyl)-2-fluoroacetonitrile (2AL)

Purification by PTLC (chloroform/EtOAc = 19:1) afforded **2AL** (44.0 mg, 61% yield) as a pale yellow solid.  $^1\text{H}$  NMR (400 MHz,  $\text{CDCl}_3$ )  $\delta$  8.91 (s, 2H), 7.57 (d,  $J = 1.6$  Hz, 2H), 7.44 (t,  $J = 1.6$  Hz, 1H);  $^{13}\text{C}$  NMR (101 MHz,  $\text{CDCl}_3$ )  $\delta$  160.4 (d,  $J_{\text{C-F}} = 25.1$  Hz), 159.0, 137.4 (d,  $J_{\text{C-F}} = 25.1$  Hz), 135.9, 130.8,



124.0 (d,  $J_{C-F}$  = 6.8 Hz), 121.6, 114.9 (d,  $J_{C-F}$  = 32.0 Hz), 89.6 (d,  $J_{C-F}$  = 196.8 Hz);  $^{19}\text{F}$  NMR (376 MHz,  $\text{CDCl}_3$ )  $\delta$  -146.0; HRMS (DART)  $m/z$  calcd for  $\text{C}_{12}\text{H}_6\text{BrCl}_2\text{FN}_3$   $[\text{M}+\text{H}]^+$ : 359.9101 found 359.9099.

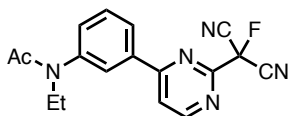

### ***N*-(3-(2-(Dicyanofluoromethyl)pyrimidin-4-yl)phenyl)-*N*-ethylacetamide (2AM)**

Purification by Isolera<sup>®</sup> (hexane/EtOAc = 19:1 to 9:1) afforded **2AM** (31.7 mg, 49% yield) as a yellow solid.  $^1\text{H}$  NMR (400 MHz,  $\text{CDCl}_3$ )  $\delta$  9.02 (d,  $J$  = 4.8 Hz, 1H), 8.20 (d,  $J$  = 7.6 Hz, 1H), 8.02 (s, 1H), 7.98 (d,  $J$  = 4.8 Hz, 1H), 7.66 (t,  $J$  = 7.6 Hz, 1H), 7.43 (d,  $J$  = 7.6 Hz, 1H), 3.83 (q,  $J$  = 7.2 Hz, 2H), 1.89 (s, 3H), 1.17 (t,  $J$  = 7.2 Hz, 3H);  $^{13}\text{C}$  NMR (101 MHz,  $\text{CDCl}_3$ )  $\delta$  169.6, 164.9, 159.6, 157.7 (d,  $J_{C-F}$  = 22.1 Hz), 144.2, 136.0, 132.4, 130.8, 127.1, 126.9, 118.6, 110.0 (d,  $J_{C-F}$  = 35.6 Hz), 78.7 (d,  $J_{C-F}$  = 201.3 Hz), 44.0, 22.9, 13.1;  $^{19}\text{F}$  NMR (376 MHz,  $\text{CDCl}_3$ )  $\delta$  -137.8; HRMS (ESI)  $m/z$  calcd for  $\text{C}_{17}\text{H}_{15}\text{FN}_5\text{O}$   $[\text{M}+\text{H}]^+$ : 324.1255 found 324.1253.

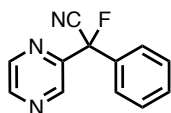

### **2-Fluoro-2-phenyl-2-(pyrazin-2-yl)acetonitrile (2AN)**

The reaction was performed with  $\text{NaClO}_4$  (1.0 equiv). Purification by PTLC (hexane/EtOAc = 2:1) afforded **2AN** (17.1 mg, 40% yield) as a white solid.  $^1\text{H}$  NMR (400 MHz,  $\text{CDCl}_3$ )  $\delta$  8.91 (d,  $J$  = 1.2 Hz, 1H), 8.69 (d,  $J$  = 2.0 Hz, 1H), 8.61–8.55 (m, 1H), 7.61–7.55 (m, 2H), 7.49–7.44 (m, 3H);  $^{13}\text{C}$  NMR (101 MHz,  $\text{CDCl}_3$ )  $\delta$  151.1 (d,  $J_{C-F}$  = 29.1 Hz), 145.8, 144.0, 141.3 (d,  $J_{C-F}$  = 6.8 Hz), 134.7 (d,  $J_{C-F}$  = 23.2 Hz), 130.7, 129.2, 125.6 (d,  $J_{C-F}$  = 5.8 Hz), 115.8 (d,  $J_{C-F}$  = 32.0 Hz), 91.2 (d,  $J_{C-F}$  = 187.2 Hz);  $^{19}\text{F}$  NMR (376 MHz,  $\text{CDCl}_3$ )  $\delta$  -145.6; HRMS (ESI)  $m/z$  calcd for  $\text{C}_{12}\text{H}_9\text{FN}_3$   $[\text{M}+\text{H}]^+$ : 214.0775 found 214.0775.

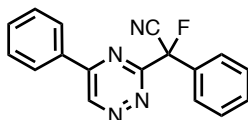

### **2-Fluoro-2-phenyl-2-(5-phenyl-1,2,4-triazin-3-yl)acetonitrile (2AO)**

Purification by PTLC (hexane/EtOAc = 4:1) afforded **2AO** (18.0 mg, 31% yield) as a yellow solid.  $^1\text{H}$  NMR (400 MHz,  $\text{CDCl}_3$ )  $\delta$  9.73 (s, 1H), 8.23 (d,  $J$  = 8.8 Hz, 2H), 7.83–7.75 (m, 2H), 7.69–7.63 (m, 1H), 7.62–7.56 (m, 2H), 7.50–7.44 (m, 3H);  $^{13}\text{C}$  NMR (101 MHz,  $\text{CDCl}_3$ )  $\delta$  163.2 (d,  $J_{C-F}$  = 25.1 Hz), 156.1, 146.2, 134.2 (d,  $J_{C-F}$  = 25.3 Hz), 133.7, 132.0, 130.7, 129.7, 129.1, 128.0, 125.7 (d,  $J_{C-F}$  = 4.8 Hz), 115.6 (d,  $J_{C-F}$  = 32.0 Hz), 90.8 (d,  $J_{C-F}$  = 194.9 Hz);  $^{19}\text{F}$  NMR (376 MHz,  $\text{CDCl}_3$ )  $\delta$  -146.0; HRMS (ESI)  $m/z$  calcd for  $\text{C}_{17}\text{H}_{11}\text{FN}_4\text{Na}$   $[\text{M}+\text{Na}]^+$ : 313.0860 found 313.0858.

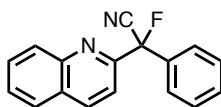

### 2-Fluoro-2-phenyl-2-(quinolin-2-yl)acetonitrile (2AP)

The reaction was performed with  $\text{NaClO}_4$  (1.0 equiv). Purification by PTLC (hexane/EtOAc = 4:1) afforded **2AP** (45.6 mg, 87% yield) as a colorless oil.  $^1\text{H}$  NMR (400 MHz,  $\text{CDCl}_3$ )  $\delta$  8.27 (d,  $J = 8.4$  Hz, 1H), 8.20 (d,  $J = 8.4$  Hz, 1H), 7.86 (d,  $J = 8.4$  Hz, 1H), 7.81–7.77 (m, 1H), 7.64–7.60 (m, 4H), 7.44–7.41 (m, 3H);  $^{13}\text{C}$  NMR (101 MHz,  $\text{CDCl}_3$ )  $\delta$  154.7 (d,  $J_{\text{C-F}} = 29.1$  Hz), 147.1, 138.0, 136.0 (d,  $J_{\text{C-F}} = 24.3$  Hz), 130.4, 130.1, 130.0, 128.9, 127.9, 127.6, 125.6 (d,  $J_{\text{C-F}} = 5.9$  Hz), 116.7 (d,  $J_{\text{C-F}} = 32.9$  Hz), 116.6 (d,  $J_{\text{C-F}} = 4.8$  Hz), 92.8 (d,  $J_{\text{C-F}} = 187.3$  Hz) (one peak is missing due to overlapping);  $^{19}\text{F}$  NMR (376 MHz,  $\text{CDCl}_3$ )  $\delta$  -143.3; HRMS (ESI)  $m/z$  calcd for  $\text{C}_{17}\text{H}_{12}\text{FN}_2$   $[\text{M}+\text{H}]^+$ : 263.0979 found 263.0980.

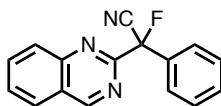

### 2-Fluoro-2-phenyl-2-(quinazolin-2-yl)acetonitrile (2AQ)

Purification by PTLC (hexane/EtOAc = 4:1) afforded **2AQ** (41.6 mg, 79% yield) as a white solid.  $^1\text{H}$  NMR (400 MHz,  $\text{CDCl}_3$ )  $\delta$  9.45 (s, 1H), 8.20 (d,  $J = 8.8$  Hz, 1H), 8.05–7.99 (m, 2H), 7.79–7.74 (m, 3H), 7.47–7.41 (m, 3H);  $^{13}\text{C}$  NMR (101 MHz,  $\text{CDCl}_3$ )  $\delta$  161.8, 159.3 (d,  $J_{\text{C-F}} = 24.2$  Hz), 150.0, 135.4, 135.3 (d,  $J_{\text{C-F}} = 24.2$  Hz), 130.4, 129.4, 129.0, 127.4, 125.9 (d,  $J_{\text{C-F}} = 5.9$  Hz), 124.4, 116.6 (d,  $J_{\text{C-F}} = 32.0$  Hz), 91.7 (d,  $J_{\text{C-F}} = 193.0$  Hz) (one peak is missing due to overlapping);  $^{19}\text{F}$  NMR (376 MHz,  $\text{CDCl}_3$ )  $\delta$  -143.9; HRMS (ESI)  $m/z$  calcd for  $\text{C}_{16}\text{H}_{11}\text{FN}_3$   $[\text{M}+\text{H}]^+$ : 264.0932 found 264.0932.

## 5. Effect of Parameters

### 5-1. Screening of Fluorinating Reagents

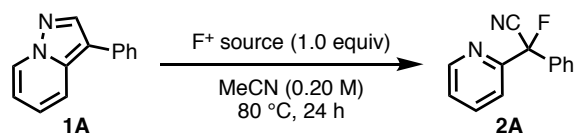

| entry | F <sup>+</sup> source    | yield of <b>2A</b> <sup>a</sup> / % | recovery of <b>1A</b> <sup>a</sup> / % |
|-------|--------------------------|-------------------------------------|----------------------------------------|
| 1     | <b>F1</b>                | 27                                  | 43                                     |
| 2     | <b>F2</b>                | 34                                  | 0                                      |
| 3     | <b>F3</b>                | 39                                  | 37                                     |
| 4     | <b>F4</b>                | 3                                   | 0                                      |
| 5     | <b>F5</b>                | 5                                   | 3                                      |
| 6     | NFSI                     | 97                                  | 0                                      |
| 7     | Selectfluor <sup>®</sup> | quant.                              | 0                                      |

[a] Yields were determined by <sup>1</sup>H NMR analysis using CH<sub>2</sub>Br<sub>2</sub> as an internal standard.

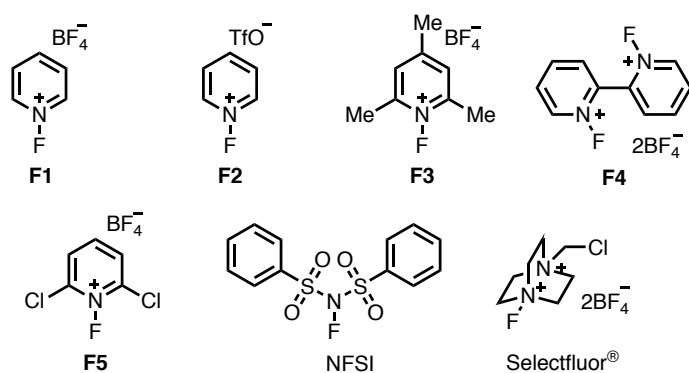

### 5-2. Effect of Solvent

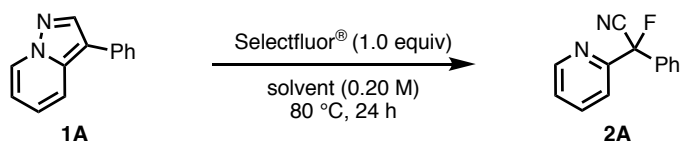

| entry | solvent | yield of <b>2A</b> <sup>a</sup> / % | recovery of <b>1A</b> <sup>a</sup> / % |
|-------|---------|-------------------------------------|----------------------------------------|
| 1     | MeCN    | quant.                              | 0                                      |
| 2     | acetone | 65                                  | 0                                      |
| 3     | DMF     | 64                                  | 0                                      |
| 4     | MeOH    | 58                                  | 0                                      |
| 5     | EtOAc   | 98                                  | 0                                      |

[a] Yields were determined by <sup>1</sup>H NMR analysis using CH<sub>2</sub>Br<sub>2</sub> as an internal standard.

### 5-3. Effect of Temperature

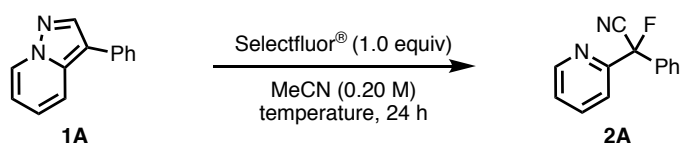

| entry | temperature / °C | yield of <b>2A</b> <sup>a</sup> / % | recovery of <b>1A</b> <sup>a</sup> / % |
|-------|------------------|-------------------------------------|----------------------------------------|
| 1     | 50               | 68                                  | 0                                      |
| 2     | 60               | 74                                  | 0                                      |
| 3     | 70               | 87                                  | 0                                      |
| 4     | 80               | quant.                              | 0                                      |

[a] Yields were determined by <sup>1</sup>H NMR analysis using CH<sub>2</sub>Br<sub>2</sub> as an internal standard.

### 5-4. Effect of Temperature for 1Z

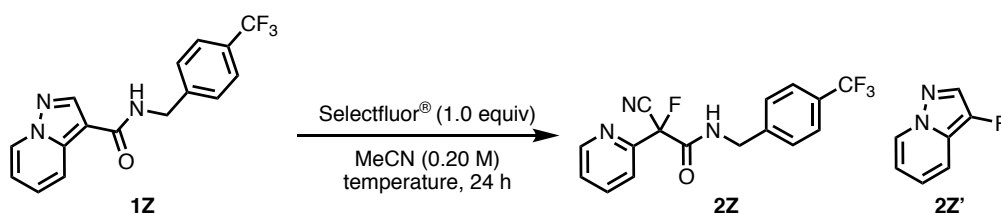

| entry | temperature / °C | yield of <b>2Z</b> / % | yield of <b>2Z'</b> / % |
|-------|------------------|------------------------|-------------------------|
| 1     | 80               | 13                     | 60                      |
| 2     | RT               | 24                     | 42                      |
| 3     | -30              | 39                     | 21                      |

### 5-5. Effect of Additive

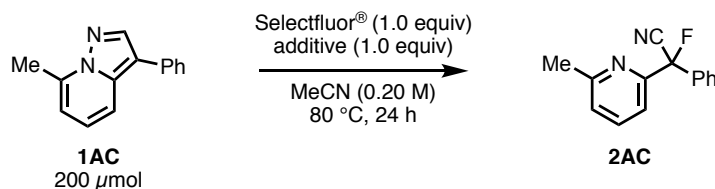

| entry | additive           | yield of <b>2AC</b> <sup>a</sup> / % | recovery of <b>1AC</b> <sup>a</sup> / % |
|-------|--------------------|--------------------------------------|-----------------------------------------|
| 1     | none               | 53(51) <sup>b</sup>                  | 0                                       |
| 2     | LiPF <sub>6</sub>  | 42                                   | 0                                       |
| 3     | NaPF <sub>6</sub>  | 0                                    | 0                                       |
| 4     | KPF <sub>6</sub>   | 0                                    | 0                                       |
| 5     | LiClO <sub>4</sub> | 37                                   | 0                                       |
| 6     | NaClO <sub>4</sub> | 88(87) <sup>b</sup>                  | 0                                       |
| 7     | LiOTf              | 18                                   | 0                                       |
| 8     | NaOTf              | 39                                   | 0                                       |
| 9     | KOTf               | 72                                   | 0                                       |
| 10    | TBAC               | 42                                   | 12                                      |

[a] Yields were determined by <sup>1</sup>H NMR analysis using CH<sub>2</sub>Br<sub>2</sub> as an internal standard.

[b] Numbers in parentheses are isolated yield.

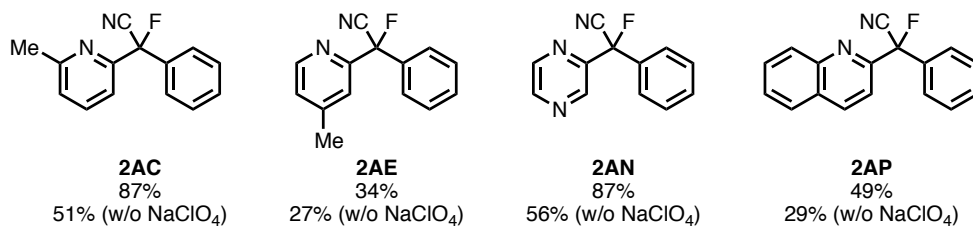

## 5-6. Addition of Radical Scavengers

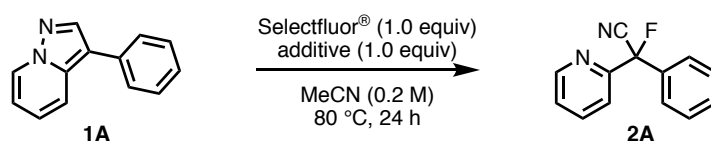

| entry | additive   | yield of <b>2A</b> <sup>a</sup> (%) | recovery of <b>1A</b> <sup>a</sup> (%) |
|-------|------------|-------------------------------------|----------------------------------------|
| 1     | TEMPO      | 36                                  | 60                                     |
| 2     | Galvinoxyl | 94                                  | 0                                      |
| 3     | BHT        | 87                                  | 0                                      |

[a] Yields were determined by <sup>1</sup>H NMR analysis using CH<sub>2</sub>Br<sub>2</sub> as an internal standard.

## 6. Fluorination Tracking by $^1\text{H}$ NMR

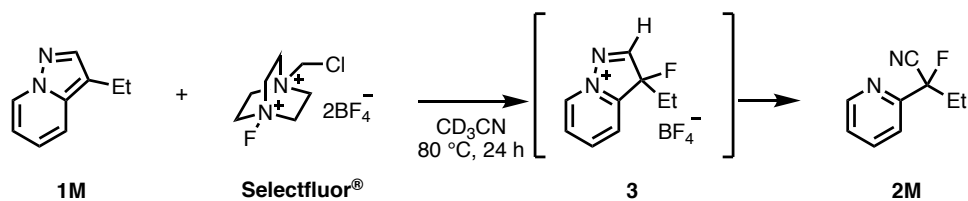

A Wilmad<sup>®</sup> screw-cap NMR tube was dried with a heat-gun *in vacuo* and filled with  $\text{N}_2$  gas after cooling to room temperature. To this tube was added **1M** (7.3 mg,  $50.0\ \mu\text{mol}$ , 1.0 equiv) and Selectfluor<sup>®</sup> (17.8 mg,  $50.0\ \mu\text{mol}$ , 1.0 equiv). The tube was placed under vacuum and refilled with  $\text{N}_2$  gas three times. To this tube was added acetonitrile- $d_3$  (0.5 mL). The tube was sealed with a screw cap and then heated at  $80\text{ }^\circ\text{C}$  for 24 h in an oil bath. The reaction progress was measured by  $^1\text{H}$  NMR spectra at 1, 2, 4, 8, 16, and 24 h.

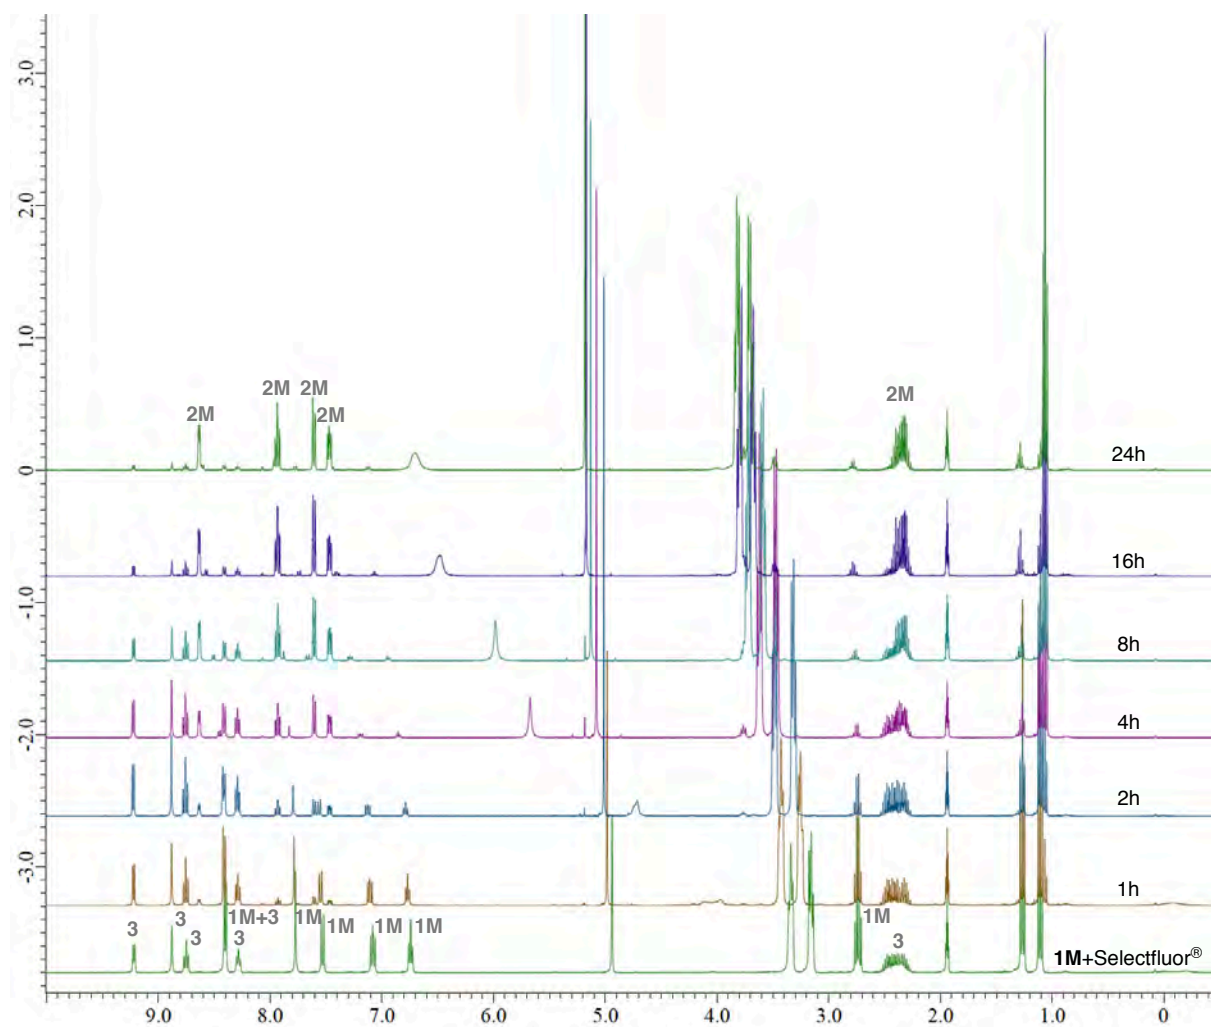

## 7. Another Role of Selectfluor<sup>®</sup>

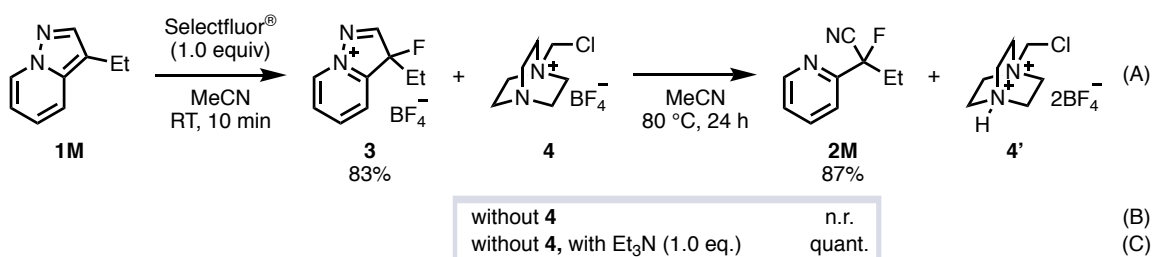

### Preparation of **3**

An 8-mL glass tube equipped with a screw cap containing a magnetic stirring bar was dried with a heat-gun *in vacuo* and filled with N<sub>2</sub> gas after cooling to room temperature. To this tube were added **1M** (29.2 mg, 0.200 mmol, 1.0 equiv) and Selectfluor<sup>®</sup> (70.8 mg, 0.200 mmol, 1.0 equiv). The tube was placed under vacuum and refilled with N<sub>2</sub> gas three times. To this tube was added MeCN (1.0 mL). After stirred at room temperature for 10 min, the mixture was concentrated *in vacuo* and washed with chloroform (to remove remaining **1M** and **2M**). The filtrate was concentrated *in vacuo* and extracted with acetone (to remove remaining Selectfluor<sup>®</sup> and **4'**). The solution was concentrated *in vacuo* to afford the crude material containing **3** (83% yield) and **4**. The yield of **3** was determined by <sup>1</sup>H NMR analysis using CH<sub>2</sub>Br<sub>2</sub> as an internal standard.

### Experiment A

An 8-mL glass tube equipped with a screw cap containing a magnetic stirring bar was dried with a heat-gun *in vacuo* and filled with N<sub>2</sub> gas after cooling to room temperature. To this tube was added a solution of the crude material containing **3** and **4** in MeCN (1.0 mL). The tube was sealed with a screw cap and then heated at 80 °C for 24 h. After cooling the reaction mixture to room temperature, the mixture was concentrated *in vacuo*. The residue was filtered with chloroform to afford **2M** (21.1 mg, 87% yield) as a colorless oil.

### Experiment B

To the crude material containing **3** and **4** were added MeCN (1.0 mL) and 4.0 M HCl in 1,4-dioxane (100 μL, 0.400 mmol) dropwise at 0 °C. After stirred at room temperature for 3 h, the mixture was concentrated *in vacuo* and extracted acetone (to remove remaining **4'**). An 8-mL glass tube equipped with a screw cap containing a magnetic stirring bar was dried with a heat-gun *in vacuo* and filled with N<sub>2</sub> gas after cooling to room temperature. To this tube was added a solution of the obtained material containing **3** was added MeCN (1.0 mL). The tube was sealed with a screw cap and then heated at 80 °C for 24 h. However, no reaction progress was observed.

### Experiment C

To the crude material containing **3** and **4** were added MeCN (1.0 mL) and 4.0 M HCl in 1,4-dioxane (100 μL, 0.400 mmol) dropwise at 0 °C. After stirred at room temperature for 3 h, the mixture was concentrated *in vacuo* and extracted acetone (to remove remaining **4'**). An 8-mL glass tube equipped with a screw cap containing a magnetic stirring bar was dried with a heat-gun *in vacuo* and filled with

N<sub>2</sub> gas after cooling to room temperature. To this tube was added a solution of the obtained material containing **3** were added MeCN (1.0 mL) and Et<sub>3</sub>N (28 μL, 0.200 mmol). The tube was sealed with a screw cap and then heated at 80 °C for 24 h. After cooling the reaction mixture to room temperature, the mixture was concentrated *in vacuo*. The residue was filtered with chloroform to afford **2M** (24.3 mg, quant.) as a colorless oil.

## 8. Fluorination of **5** and **7**

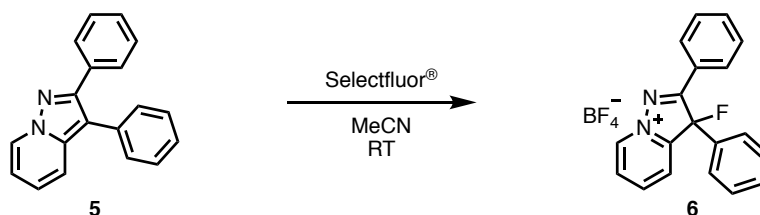

An 8-mL glass tube equipped with a screw cap containing a magnetic stirring bar was dried with a heat-gun *in vacuo* and filled with N<sub>2</sub> gas after cooling to room temperature. To this tube were added 2,3-diphenylpyrazolo[1,5-*a*]pyridine (**5**: 135 mg, 0.500 mmol, 1.0 equiv) and Selectfluor® (177 mg, 0.500 mmol, 1.0 equiv). The tube was placed under vacuum and refilled with N<sub>2</sub> gas three times. To this tube was added MeCN (2.5 mL). The tube was sealed with a screw cap and then the mixture was stirred at 80 °C for 24 h. After cooling the mixture to room temperature, 4.0 M HCl in 1,4-dioxane (150 μL, 0.600 mmol, 1.2 equiv) was added. After stirring the mixture for 1 h, the solution was concentrated *in vacuo*. The resulting material was extracted with acetone, and insoluble solids were removed by filtration. The filtrate was concentrated *in vacuo*, recrystallized from Et<sub>2</sub>O/MeCN to afford 3-fluoro-2,3-diphenyl-3*H*-pyrazolo[1,5-*a*]pyridin-8-ium tetrafluoroborate (**6**: 160 mg, 85% yield) as a white solid. <sup>1</sup>H NMR (400 MHz, acetonitrile-*d*<sub>3</sub>) δ 9.30 (d, *J* = 7.2 Hz, 1H), 8.63 (t, *J* = 7.2 Hz, 1H), 8.28 (t, *J* = 7.2 Hz, 1H), 8.22 (d, *J* = 7.2 Hz, 1H), 8.05 (d, *J* = 8.0 Hz, 2H), 7.77 (t, *J* = 8.0 Hz, 1H), 7.61–7.57 (m, 2H), 7.56–7.50 (m, 5H); <sup>13</sup>C NMR (101 MHz, acetonitrile-*d*<sub>3</sub>) δ 173.4 (d, *J*<sub>C-F</sub> = 15.6 Hz), 148.8, 148.0 (d, *J*<sub>C-F</sub> = 27.2 Hz), 141.2, 136.8, 132.4, 132.2 (d, *J*<sub>C-F</sub> = 29.1 Hz), 131.6, 131.0 (d, *J*<sub>C-F</sub> = 2.9 Hz), 130.9, 125.5, 125.32, 125.25, 125.2 (d, *J*<sub>C-F</sub> = 5.8 Hz), 103.8 (d, *J*<sub>C-F</sub> = 203.7 Hz); <sup>19</sup>F NMR (376 MHz, CDCl<sub>3</sub>) δ -150.1 (m, 4F), -161.6; HRMS (ESI) *m/z* calcd for C<sub>19</sub>H<sub>14</sub>FN<sub>2</sub> [M-BF<sub>4</sub>]<sup>+</sup>: 289.1136 found 289.1136.

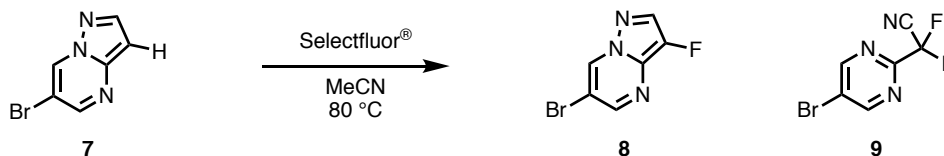

An 8-mL glass tube equipped with a screw cap containing a magnetic stirring bar was dried with a heat-gun *in vacuo* and filled with N<sub>2</sub> gas after cooling to room temperature. To this tube were added 6-bromopyrazolo[1,5-*a*]pyrimidine (**7**: 39.6 mg, 0.200 mmol, 1.0 equiv) and Selectfluor® (70.9 mg, 0.200 mmol, 1.0 equiv). The tube was placed under vacuum and refilled with N<sub>2</sub> gas three times. To this tube



was added MeCN (1.0 mL). The tube was sealed with a screw cap and then heated at 80 °C for 24 h with stirring. After cooling the reaction mixture to room temperature, the mixture was concentrated *in vacuo*. The residue was purified by Isolera<sup>®</sup> (hexane/EtOAc = 19:1 to 9:1) to afford 6-bromo-3-fluoropyrazolo[1,5-*a*]pyrimidine (**8**: 21.6 mg, 50% yield) as a white solid and 2-(5-bromopyrimidin-2-yl)-2,2-difluoroacetonitrile (**9**: 4.7 mg, 10% yield) as a colorless oil.

When reaction was performed with Selectfluor<sup>®</sup> (2.0 equiv), only **9** was obtained (16.4 mg, 58% yield).

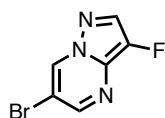

#### 6-Bromo-3-fluoropyrazolo[1,5-*a*]pyrimidine (**8**)

<sup>1</sup>H NMR (400 MHz, CDCl<sub>3</sub>) δ 8.68 (dd, *J* = 2.4, 1.2 Hz, 1H), 8.43 (d, *J* = 1.6 Hz, 1H), 8.00 (d, *J*<sub>H-F</sub> = 3.6 Hz, 1H); <sup>13</sup>C NMR (101 MHz, CDCl<sub>3</sub>) δ 149.4 (d, *J*<sub>C-F</sub> = 20.2 Hz), 138.7 (d, *J*<sub>C-F</sub> = 251.2 Hz), 134.6, 133.3 (d, *J*<sub>C-F</sub> = 23.2 Hz), 131.8 (d, *J*<sub>C-F</sub> = 11.6 Hz), 104.0; <sup>19</sup>F NMR (376 MHz, CDCl<sub>3</sub>) δ -180.9; HRMS (DART) *m/z* calcd for C<sub>6</sub>H<sub>4</sub>BrFN<sub>3</sub> [M+H]<sup>+</sup>: 215.9567 found 215.9566.

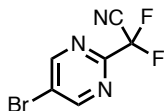

#### 2-(5-Bromopyrimidin-2-yl)-2,2-difluoroacetonitrile (**9**)

<sup>1</sup>H NMR (400 MHz, CDCl<sub>3</sub>) δ 9.00 (s, 2H); <sup>13</sup>C NMR (101 MHz, CDCl<sub>3</sub>) δ 159.2, 155.6 (t, *J*<sub>C-F</sub> = 27.6 Hz), 123.7, 111.2 (t, *J*<sub>C-F</sub> = 44.6 Hz), 105.9 (t, *J*<sub>C-F</sub> = 250.2 Hz); <sup>19</sup>F NMR (376 MHz, CDCl<sub>3</sub>) δ -137.2; HRMS (DART) *m/z* calcd for C<sub>6</sub>H<sub>5</sub>OBrF<sub>2</sub>N<sub>3</sub> [M+H<sub>3</sub>O]<sup>+</sup>: 251.9579 found 251.9574.

## 9. Studies Toward Asymmetric Fluorination

### 9-1. Using Chiral Phosphoric Acid<sup>[15]</sup>

#### 9-1-1. Screening of Solvents

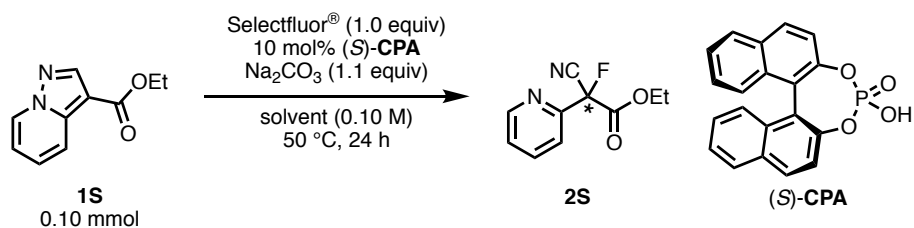

| entry | solvent                         | yield of <b>2S</b> <sup>a</sup> / % | recovery of <b>1S</b> <sup>a</sup> / % |
|-------|---------------------------------|-------------------------------------|----------------------------------------|
| 1     | <i>n</i> -heptane               | 23                                  | 73                                     |
| 2     | cyclohexane                     | 15                                  | 78                                     |
| 3     | <i>n</i> -hexane                | 20                                  | 83                                     |
| 4     | PhMe                            | 0                                   | 98                                     |
| 5     | PhF                             | 0                                   | 100                                    |
| 6     | <i>m</i> -xylene                | 0                                   | 100                                    |
| 7     | 1,4-dioxane                     | 0                                   | 100                                    |
| 8     | DME                             | 0                                   | 100                                    |
| 9     | Et <sub>2</sub> O               | 8                                   | 90                                     |
| 10    | <sup>t</sup> Pr <sub>2</sub> O  | 5                                   | 95                                     |
| 11    | CPME                            | 0                                   | 80                                     |
| 12    | THF                             | 0                                   | 100                                    |
| 13    | CHCl <sub>3</sub>               | 0                                   | 100                                    |
| 14    | CH <sub>2</sub> Cl <sub>2</sub> | 0                                   | 100                                    |
| 15    | ZEORORA <sup>®</sup> H          | 0                                   | 100                                    |
| 16    | PhMe/MeCN (1:1)                 | 9                                   | 90                                     |
| 17    | acetone                         | 14                                  | 78                                     |

[a] Yields were determined by <sup>1</sup>H NMR analysis using CH<sub>2</sub>Br<sub>2</sub> as an internal standard.

## 9-1-2. Screening of Chiral Phosphoric Acid

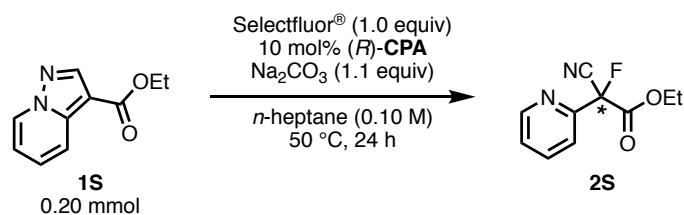

| entry | CPA                     | yield of <b>2S</b> <sup>a</sup> / % | ee of <b>2S</b> <sup>b</sup> / % | recovery of <b>1S</b> <sup>a</sup> / % |
|-------|-------------------------|-------------------------------------|----------------------------------|----------------------------------------|
| 1     | ( <i>R</i> )- <b>C1</b> | 10                                  | 0                                | 85                                     |
| 2     | ( <i>R</i> )- <b>C2</b> | 15                                  | 0                                | 87                                     |
| 3     | ( <i>R</i> )- <b>C3</b> | 14                                  | 1                                | 82                                     |
| 4     | ( <i>R</i> )- <b>C4</b> | 3                                   | –                                | 77                                     |
| 5     | ( <i>R</i> )- <b>C5</b> | 3                                   | –                                | 95                                     |
| 6     | ( <i>R</i> )- <b>C6</b> | 8                                   | 2                                | 87                                     |

[a] Yields were determined by <sup>1</sup>H NMR analysis using CH<sub>2</sub>Br<sub>2</sub> as an internal standard.  
 [b] *Ee* values were determined by HPLC analysis.

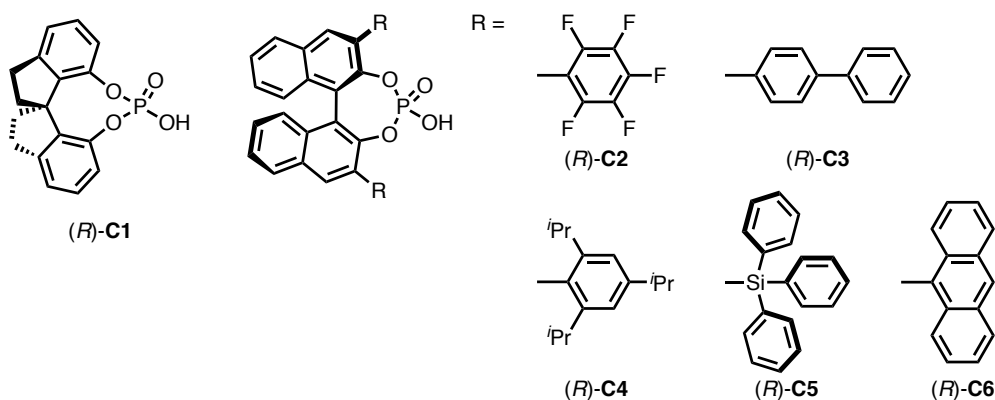

## 9-2. Decarboxylative Asymmetric Allylation<sup>[16]</sup>

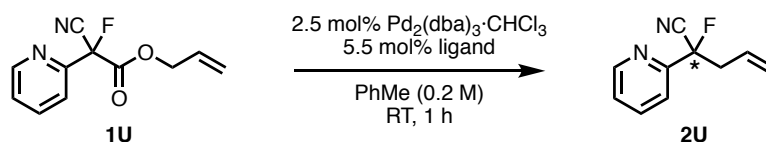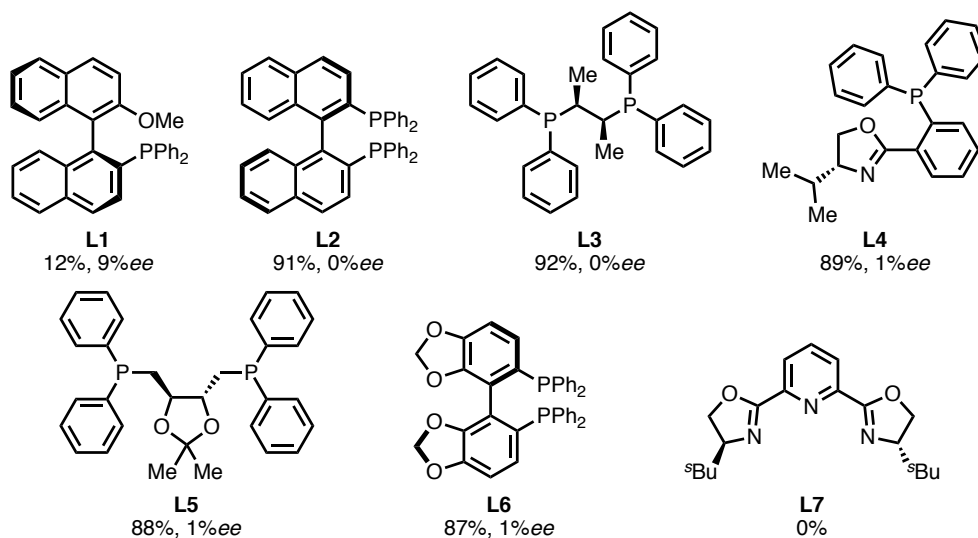

Yields were determined by <sup>19</sup>F NMR analysis using PhF as an internal standard.

### 9-3. Using Cinchona Alkaloids

#### 9-3-1. Selection of Substrate

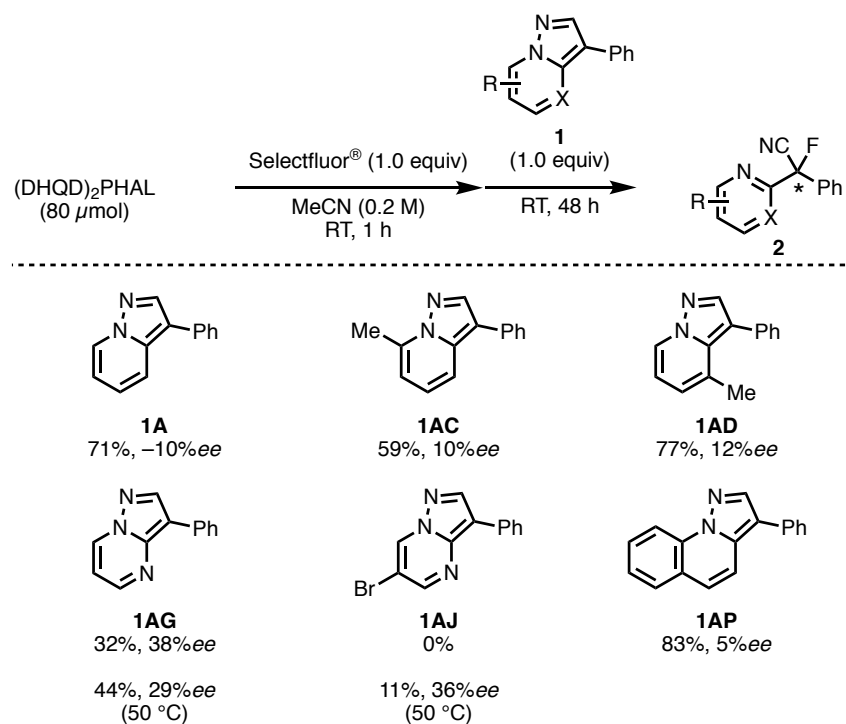

Yields were determined by  $^1\text{H}$  NMR using  $\text{CH}_2\text{Br}_2$  as an internal standard.  
*Ee* values were determined by HPLC analysis.

### 9-3-2. Screening of Cinchona Alkaloid

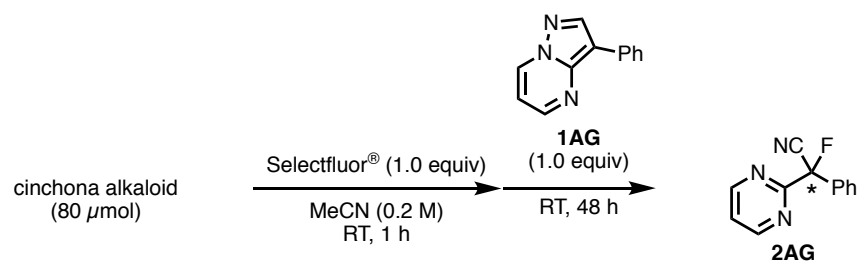

| entry | cinchona alkaloid | yield of <b>2AG</b> <sup>a</sup> / % | ee of <b>2AG</b> <sup>b</sup> / % | recovery of <b>1AG</b> <sup>a</sup> / % |
|-------|-------------------|--------------------------------------|-----------------------------------|-----------------------------------------|
| 1     | <b>N1</b>         | 32                                   | 38                                | 70                                      |
| 2     | <b>N2</b>         | 46                                   | 10                                | 70                                      |
| 3     | <b>N3</b>         | quant.                               | -6                                | 0                                       |
| 4     | <b>N4</b>         | 76                                   | 4                                 | 34                                      |
| 5     | <b>N5</b>         | 44                                   | -9                                | 70                                      |
| 6     | <b>N6</b>         | 85                                   | -20                               | 17                                      |
| 7     | <b>N7</b>         | 26                                   | 17                                | 73                                      |
| 8     | <b>N8</b>         | 72                                   | 24                                | 17                                      |
| 9     | <b>N9</b>         | 75                                   | 12                                | 12                                      |

[a] Yields were determined by <sup>1</sup>H NMR using CH<sub>2</sub>Br<sub>2</sub> as an internal standard.

[b] Ee values were determined by HPLC analysis.

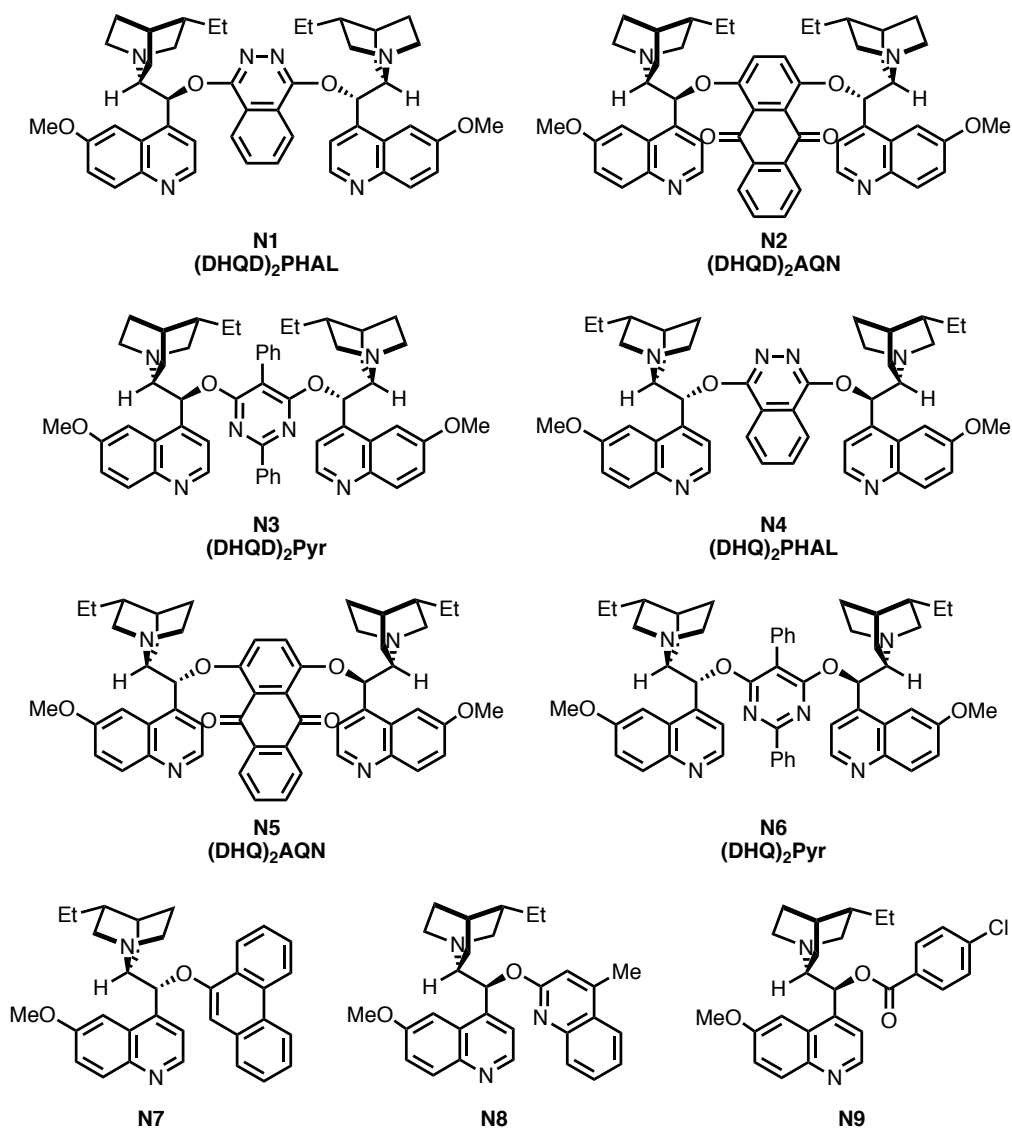

### 9-3-3. Effect of Solvent

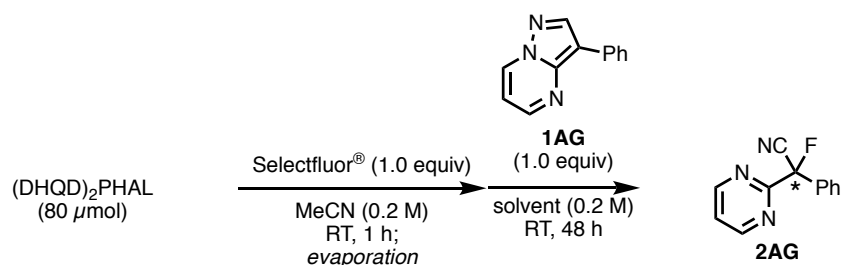

| entry | solvent                         | yield of <b>2AG</b> <sup>a</sup> / % | ee of <b>2AG</b> <sup>b</sup> / % | recovery of <b>1AG</b> <sup>a</sup> / % |
|-------|---------------------------------|--------------------------------------|-----------------------------------|-----------------------------------------|
| 1     | MeOH                            | trace                                | –                                 | 49                                      |
| 2     | DMF                             | 16                                   | 53                                | 69                                      |
| 3     | MeCN (no substitution)          | 32                                   | 38                                | 70                                      |
| 4     | acetone                         | 11                                   | 40                                | 43                                      |
| 5     | CH <sub>2</sub> Cl <sub>2</sub> | 17                                   | 11                                | 57                                      |
| 6     | CHCl <sub>3</sub>               | 22                                   | –8                                | 74                                      |
| 7     | EtOAc                           | 12                                   | 40                                | 76                                      |
| 8     | CPME                            | 16                                   | 41                                | 65                                      |
| 9     | THF                             | 9                                    | 25                                | 87                                      |
| 10    | 1,4-dioxane                     | 13                                   | 37                                | 50                                      |
| 11    | Et <sub>2</sub> O               | 20                                   | 42                                | 60                                      |
| 12    | PhF                             | 7                                    | 49                                | 93                                      |
| 13    | <i>m</i> -xylene                | 24                                   | 41                                | 66                                      |
| 14    | PhMe                            | 28                                   | 38                                | 50                                      |

[a] Yields were determined by <sup>1</sup>H NMR analysis using CH<sub>2</sub>Br<sub>2</sub> as an internal standard.

[b] *Ee* value were determined by HPLC analysis.

### 9-3-4. Effect of Fluorinating Agent

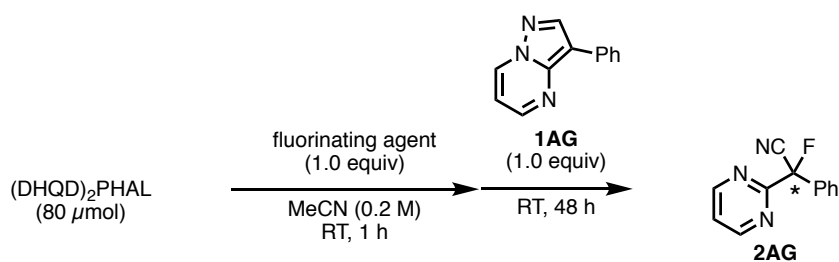

| entry          | fluorinating agent       | yield of <b>2AG</b> <sup>a</sup> / % | ee of <b>2AG</b> <sup>b</sup> / % | recovery of <b>1AG</b> <sup>a</sup> / % |
|----------------|--------------------------|--------------------------------------|-----------------------------------|-----------------------------------------|
| 1              | Selectfluor <sup>®</sup> | 32                                   | 38                                | 70                                      |
| 2              | NFSI                     | 52                                   | 35                                | 51                                      |
| 3 <sup>c</sup> | NFSI                     | 3                                    | 17                                | 87                                      |

[a] Yields were determined by <sup>1</sup>H NMR analysis using CH<sub>2</sub>Br<sub>2</sub> as an internal standard.

[b] *Ee* value was determined by HPLC analysis.

[c] 10 mol% of **(DHQD)<sub>2</sub>PHAL** was used.

### 9-3-5. Condition Optimization

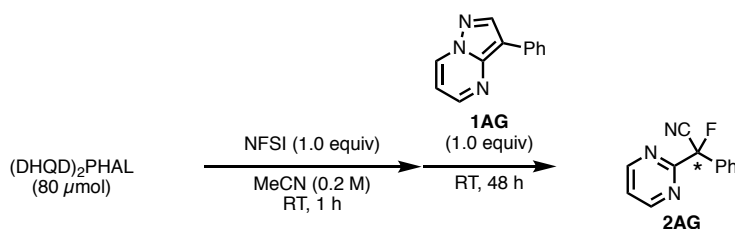

| entry | variation from the standard conditions       | yield of <b>2AG</b> <sup>a</sup> / % | e.e. of <b>2AG</b> <sup>b</sup> / % | recovery of <b>1AG</b> <sup>a</sup> / % |
|-------|----------------------------------------------|--------------------------------------|-------------------------------------|-----------------------------------------|
| 1     | none                                         | 30                                   | 50                                  | 67                                      |
| 2     | DMF (0.16 M)                                 | 38                                   | 49                                  | 61                                      |
| 3     | 0 °C for 48 h then RT for 48 h               | 11                                   | 70                                  | 64                                      |
| 4     | 0 °C for 48 h then 50 °C for 48 h            | 23                                   | 45                                  | 54                                      |
| 5     | DMF (0.16 M), 0 °C for 48 h then RT for 48 h | 41                                   | 68                                  | 59                                      |

[a] Yields were determined by <sup>1</sup>H NMR analysis using CH<sub>2</sub>Br<sub>2</sub> as an internal standard.

[b] *Ee* values were determined by HPLC analysis.

### 9-3-6. Asymmetric Ring-Opening Fluorination

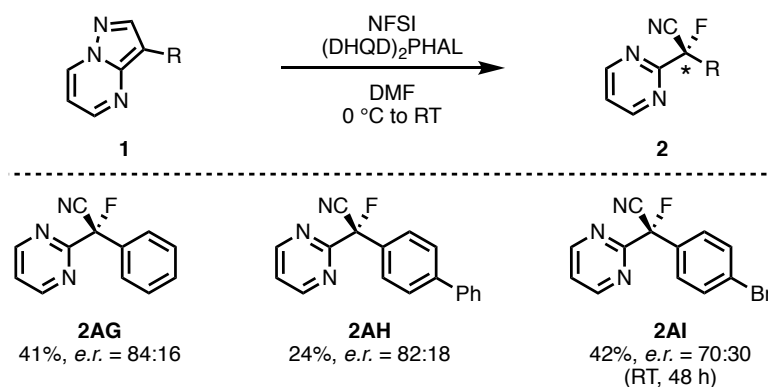

*E.r.* values were determined by HPLC analysis.

### General Procedure

An 8-mL glass tube equipped with a screw cap containing a magnetic stirring bar was dried with a heat-gun *in vacuo* and filled with N<sub>2</sub> gas after cooling to room temperature. To this tube were added NFSI (25.2 mg, 80.0  $\mu\text{mol}$ , 1.0 equiv), (DHQD)<sub>2</sub>PHAL (62.3 mg, 80.0  $\mu\text{mol}$ , 1.0 equiv), DMF (0.25 mL) at room temperature. After the mixture was stirred for 1 h, a solution pyrazolopyrimidizine **1** (80  $\mu\text{mol}$ , 1.0 equiv) in DMF (0.25 mL) was added at 0 °C. The mixture was further stirred at 0 °C for 48 h, and then warmed to room temperature. After the mixture was stirred for another 48 h, H<sub>2</sub>O was added. The mixture was extracted Et<sub>2</sub>O and washed with brine. The combined organic layer was dried over Mg<sub>2</sub>SO<sub>4</sub>, filtered, and concentrated *in vacuo*. The residue was purified by PTLC (chloroform/EtOAc = 8:1) to afford the corresponding product **2**. The enantiomer ratio of **2** was determined by chiral HPLC analysis.

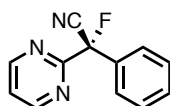

Purification by PTLC (chloroform/EtOAc = 19:1) afforded **2AG** (7.0 mg, 41% yield) as a colorless solid. *e.r.* = 84:16 [Daicel Chiralcel<sup>®</sup> OZ-H, *n*-hexane/2-propanol = 94:6, 40 °C, 0.7 mL/min,  $\lambda$  = 254 nm, *t* (minor) = 16.84 min, *t* (major) = 18.77 min].

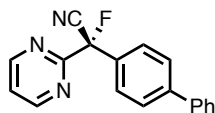

Purification by PTLC (chloroform/EtOAc = 19:1) afforded **2AH** (5.6 mg, 24% yield) as a colorless solid. *e.r.* = 82:18 [Daicel Chiralcel<sup>®</sup> OZ-H, *n*-hexane/2-propanol = 98:2, 30 °C, 0.7 mL/min,  $\lambda$  = 254 nm, *t* (minor) = 15.62 min, *t* (major) = 18.34 min]

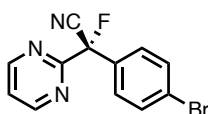

Reaction was performed at room temperature for 48 h. Purification by PTLC (chloroform/EtOAc = 19:1) afforded **2AI** (9.8 mg, 42% yield) as a colorless solid. *e.r.* = 70:30 [Daicel Chiralcel<sup>®</sup> OZ-H, *n*-hexane/2-propanol = 98:2, 30 °C, 1.2 mL/min,  $\lambda$  = 254 nm, *t* (minor) = 17.21 min, *t* (major) = 20.27 min]

### Hydrolysis of **2AI** for determining the absolute configuration

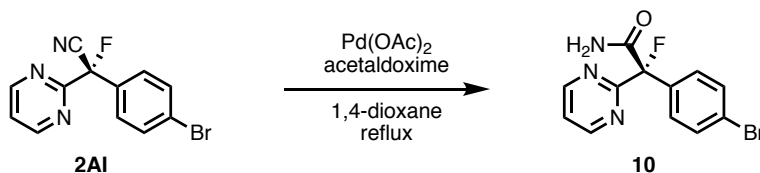

To an 8-mL glass tube containing a magnetic stirring bar and 2-(4-bromophenyl)-2-fluoro-2-(pyrimidin-2-yl)acetonitrile (**2AI**: 9.8 mg, 33.6  $\mu$ mol, 1.0 equiv, *e.r.* = 70:30) were added Pd(OAc)<sub>2</sub> (0.30 mg, 1.34  $\mu$ mol, 4.0 mol%), acetaldoxime (21  $\mu$ L, 0.336 mmol, 10 equiv), and 1,4-dioxane (0.34 mL). After the mixture was stirred with refluxing for 1 h, the crude mixture was concentrated *in vacuo*, and the resulting residue was purified by PTLC (chloroform/EtOAc = 9:1) to afford 2-(4-bromophenyl)-2-fluoro-2-(pyrimidin-2-yl)acetamide (**10**: 10.4 mg, quant.) as a white solid.  $[\alpha]_D^{20} = -158.0^\circ$  (*c* = 1.0, acetone), *e.r.* = 70:30 [Daicel Chiralpak<sup>®</sup> OD-3, *n*-hexane/2-propanol = 65:35, 30 °C, 1.2 mL/min,  $\lambda$  = 230 nm, *t* (minor) = 7.94 min, *t* (major) = 12.37 min]; <sup>1</sup>H NMR (400 MHz, CDCl<sub>3</sub>)  $\delta$  8.83 (d, *J* = 4.8 Hz, 2H), 7.58–7.53 (m, 4H), 7.33 (td, *J* = 4.8, 1.2 Hz, 1H), 6.79 (brs, 1H), 6.08 (brs, 1H); <sup>13</sup>C NMR (101 MHz, CDCl<sub>3</sub>)  $\delta$  170.2 (d, *J*<sub>C-F</sub> = 24.2 Hz), 165.3 (d, *J*<sub>C-F</sub> = 22.3 Hz), 157.6, 134.8 (d, *J*<sub>C-F</sub> = 24.2 Hz), 131.2, 128.2 (d, *J*<sub>C-F</sub> = 9.7 Hz), 123.5, 121.0, 98.2 (d, *J*<sub>C-F</sub> = 194.9 Hz); <sup>19</sup>F NMR (376 MHz, CDCl<sub>3</sub>)  $\delta$  -146.9; HRMS (ESI) *m/z* calcd for C<sub>12</sub>H<sub>10</sub>BrFN<sub>2</sub>O [M+H]<sup>+</sup>: 309.9986 found 309.9983.



Major enantiomer of **10** was isolated by HPLC using chiral stationary phase column [Daicel Chiralpak<sup>®</sup> OD-3, *n*-hexane/2-propanol = 65:35, 30 °C, 1.2 mL/min,  $\lambda$  = 254 nm, *t* (minor) = 7.94 min, *t* (major) = 12.37 min] to afford the major enantiomer. This enantiomer was recrystallized to determine the absolute configuration.

### 9-3-7. HPLC spectra

### HPLC spectra of 2AG

### Chromatogram Report

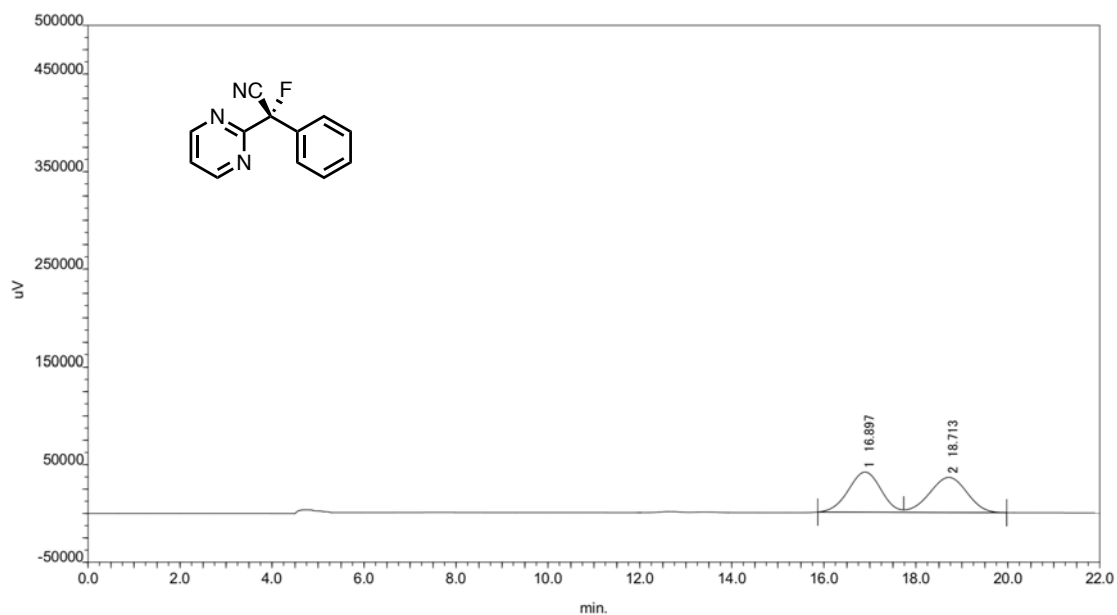

| Result No. | Rt (min) | Area      | Area (%) | height |
|------------|----------|-----------|----------|--------|
| 1          | 16.897   | 2022731.8 | 49.9     | 41175  |
| 2          | 18.713   | 2030747.1 | 50.1     | 35984  |
|            |          | 4053478.9 | 100.0    | 77159  |

### Chromatogram Report

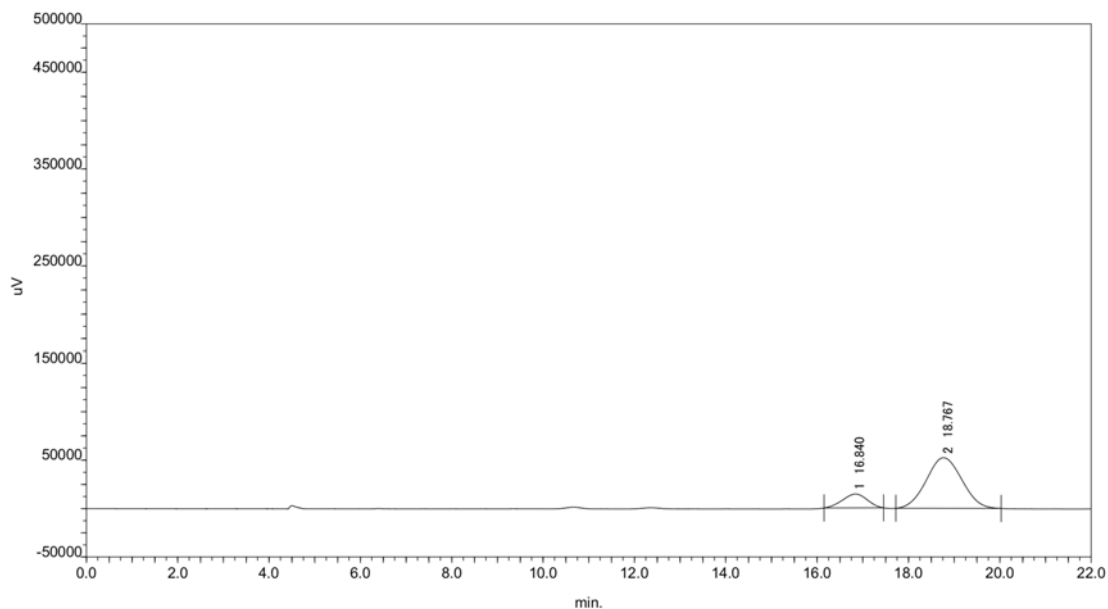

| Result No. | Rt (min) | Area      | Area (%) | height |
|------------|----------|-----------|----------|--------|
| 1          | 16.840   | 537769.4  | 16.0     | 14318  |
| 2          | 18.767   | 2827995.9 | 84.0     | 52327  |
|            |          | 3365765.3 | 100.0    | 66645  |

## HPLC spectra of 2AH

### Chromatogram Report

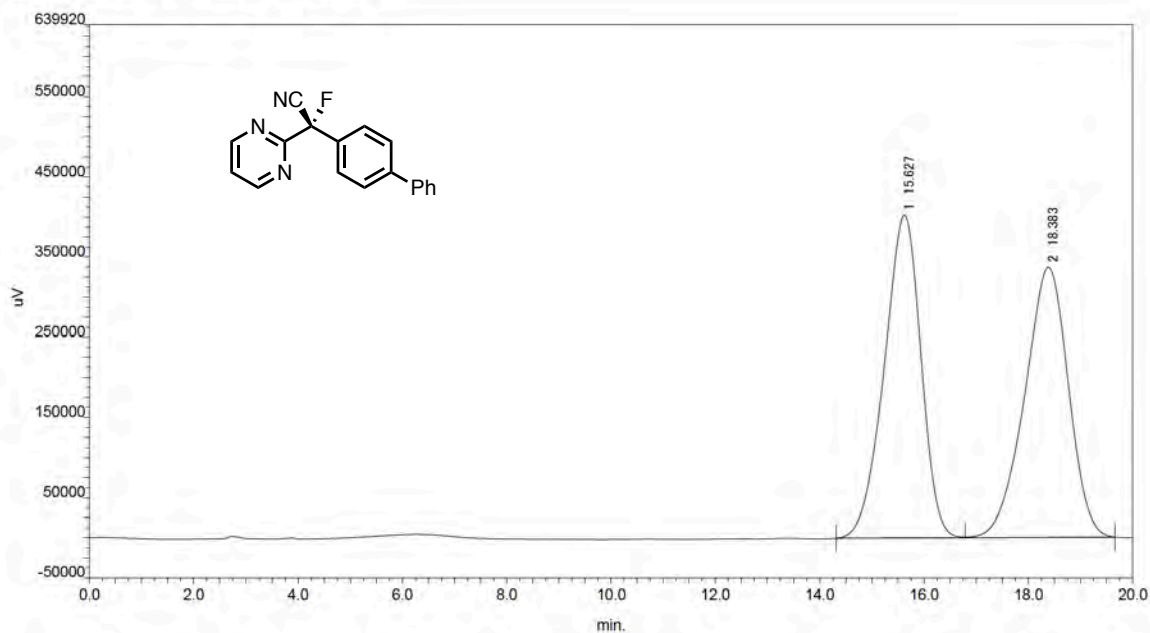

| Result No. | Rt (min) | Area       | Area(%) | height |
|------------|----------|------------|---------|--------|
| 1          | 15.627   | 19706802.3 | 50.1    | 402559 |
| 2          | 18.383   | 19622431.1 | 49.9    | 337191 |
|            |          | 39329233.4 | 100.0   | 739750 |

### Chromatogram Report

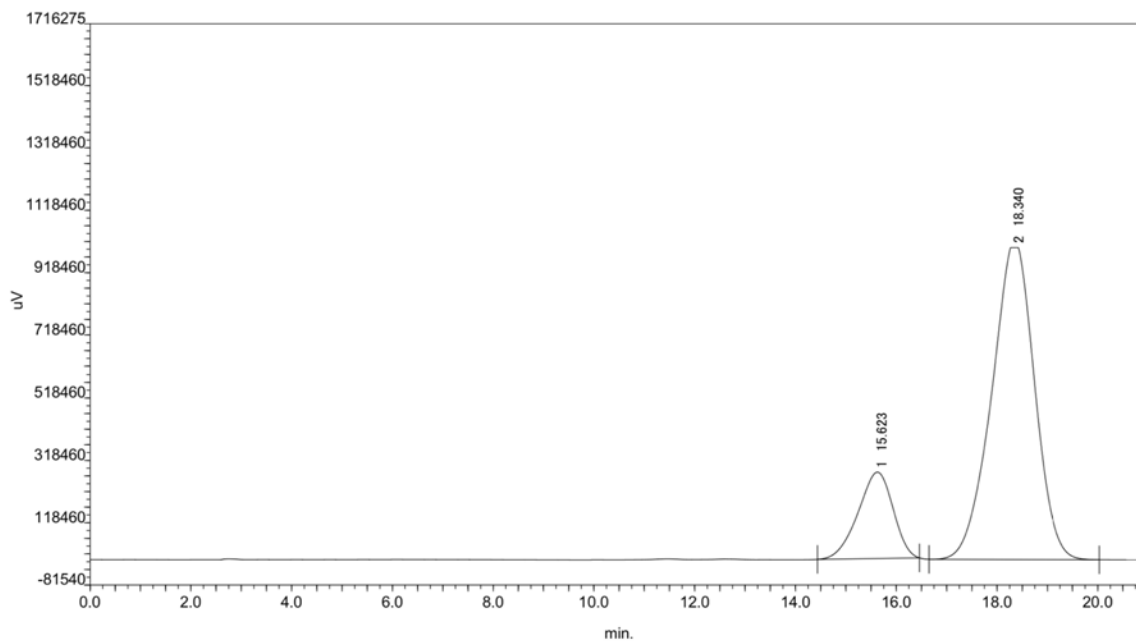

| Result No. | Rt (min) | Area       | Area(%) | height  |
|------------|----------|------------|---------|---------|
| 1          | 15.623   | 13342387.2 | 18.2    | 277046  |
| 2          | 18.340   | 59842551.2 | 81.8    | 998269  |
|            |          | 73184938.4 | 100.0   | 1275315 |

# HPLC spectra of 2AI

## Chromatogram Report

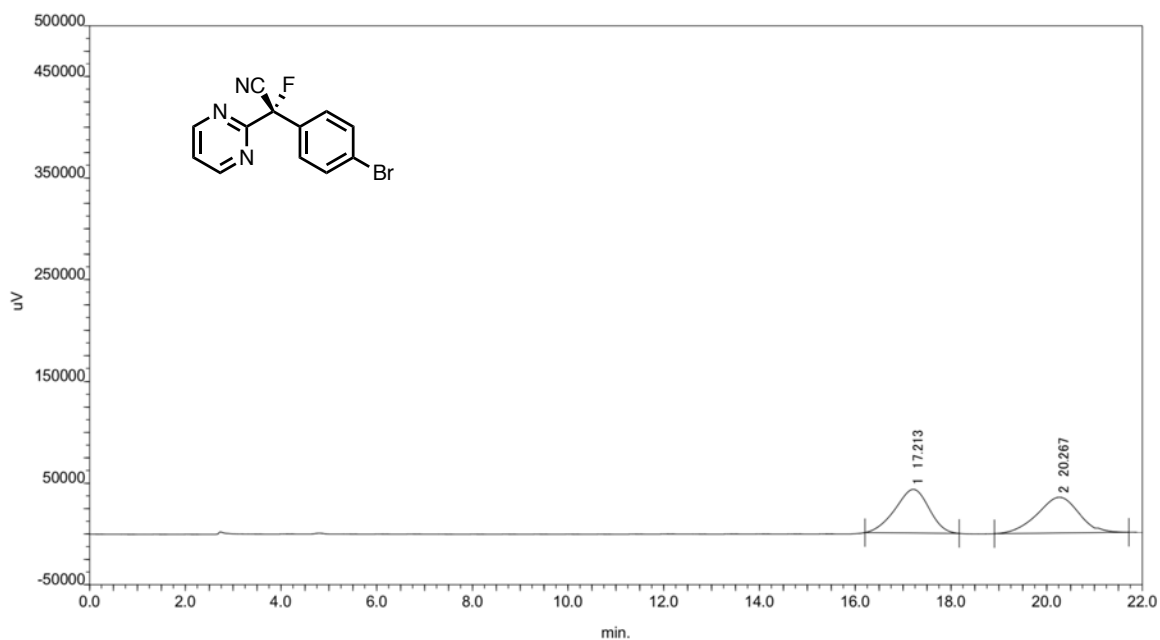

| No. | Rt (min) | Area      | Area(%) | height |
|-----|----------|-----------|---------|--------|
| 1   | 17.213   | 2123158.6 | 49.9    | 42980  |
| 2   | 20.267   | 2127784.0 | 50.1    | 35199  |
|     |          | 4250942.6 | 100.0   | 78179  |

## Chromatogram Report

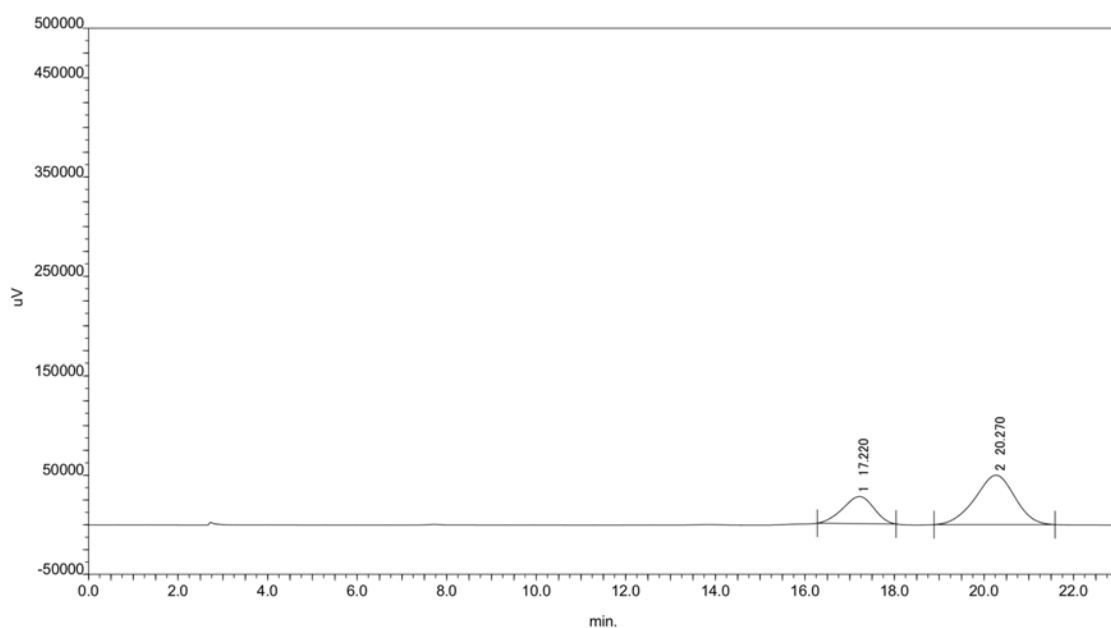

| No. | Rt (min) | Area      | Area(%) | height |
|-----|----------|-----------|---------|--------|
| 1   | 17.220   | 1314304.2 | 29.9    | 27337  |
| 2   | 20.270   | 3083421.2 | 70.1    | 49855  |
|     |          | 4397725.4 | 100.0   | 77192  |

## HPLC spectra of 10

### Chromatogram Report

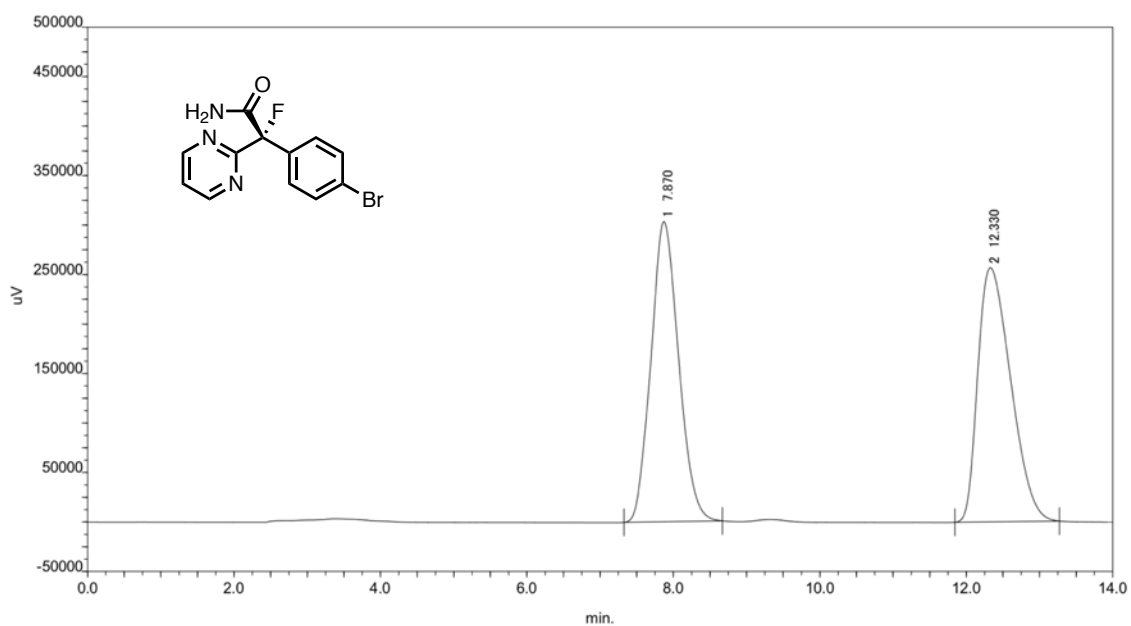

| Result No. | Rt (min) | Area       | Area (%) | height |
|------------|----------|------------|----------|--------|
| 1          | 7.870    | 7970642.6  | 49.9     | 303290 |
| 2          | 12.330   | 8010456.2  | 50.1     | 256778 |
|            |          | 15981098.8 | 100.0    | 560068 |

### Chromatogram Report

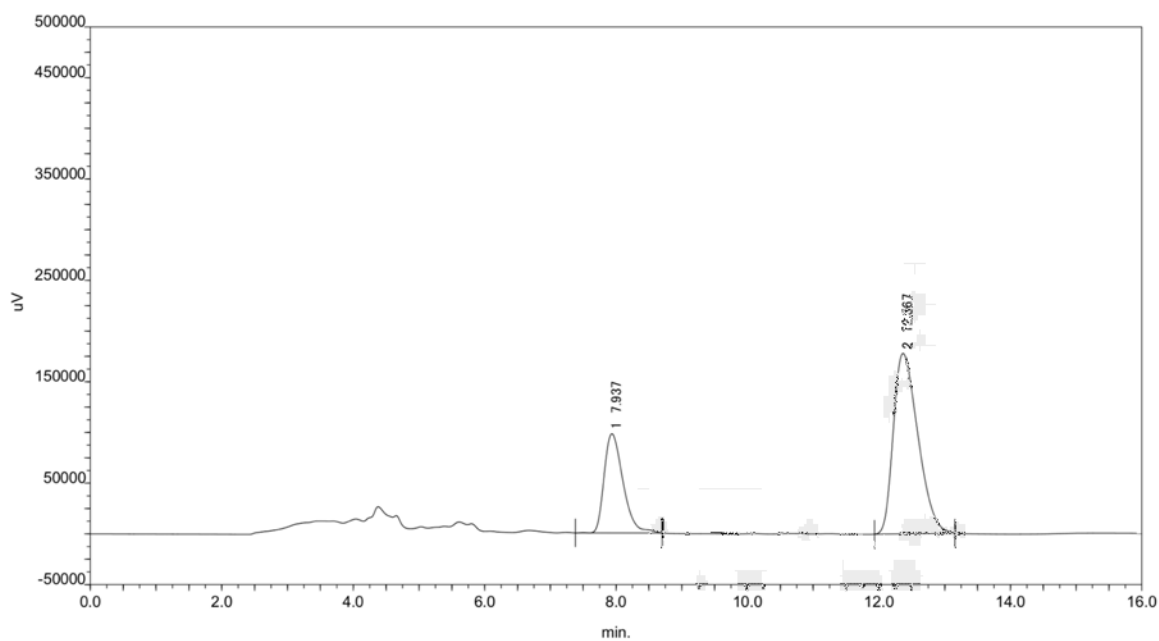

| Result No. | Rt (min) | Area      | Area (%) | height |
|------------|----------|-----------|----------|--------|
| 1          | 7.937    | 1948607.6 | 29.6     | 97824  |
| 2          | 12.367   | 4634092.8 | 70.4     | 178009 |
|            |          | 6582700.4 | 100.0    | 275833 |

### 9-3-8. X-ray Crystal Structure Analysis of (S)-10

A crystal of (S)-10 was grown from a 2-propanol/H<sub>2</sub>O (vapor diffusion). A suitable crystal was mounted with Paratone oil on a MiTeGen MicroMounts and transferred to the 3-axis Eulerian Goniometer of a Rigaku R-Axis RAPID II system with Ultrax 18 kW rotating anode X-ray generator using graphite-monochromated Cu-K<sub>α</sub> radiation and imaging plate area detector. Cell parameters were determined and refined, and raw frame data were integrated using RAPID-AUTO (RIGAKU, 1998). The structures were solved by direct methods with (SHELXT)<sup>[17]</sup> and refined by full-matrix least-squares techniques against  $F^2$  (SHELXL-2018/3)<sup>[18]</sup> by using Olex2 software package.<sup>[19]</sup> The intensities were corrected for Lorentz and polarization effects. The non-hydrogen atoms were refined anisotropically. Hydrogen atoms were placed using AFIX instructions.

Table S1. Crystallographic Data and Structure Refinement Details for (S)-10

| Compound                             | (S)-10                                             |
|--------------------------------------|----------------------------------------------------|
| CCDC number                          | 2113745                                            |
| Empirical formula                    | C <sub>12</sub> H <sub>9</sub> BrFN <sub>3</sub> O |
| Formula weight                       | 310.13                                             |
| $T / \text{K}$                       | 173(2)                                             |
| Crystal system                       | monoclinic                                         |
| Space group                          | $P2_1$                                             |
| $a / \text{Å}$                       | 8.0916(6)                                          |
| $b / \text{Å}$                       | 6.0738(5)                                          |
| $c / \text{Å}$                       | 12.9097(10)                                        |
| $\alpha / ^\circ$                    | 90                                                 |
| $\beta / ^\circ$                     | 105.671(7)                                         |
| $\gamma / ^\circ$                    | 90                                                 |
| $V / \text{Å}^3$                     | 610.89(9)                                          |
| $Z$                                  | 2                                                  |
| $D_{\text{calc}} / \text{g cm}^{-3}$ | 1.686                                              |
| $\mu / \text{mm}^{-1}$               | 4.651                                              |
| F(000)                               | 308.0                                              |
| Crystal size / mm                    | 0.4 × 0.4 × 0.3                                    |
| $\lambda / \text{Å}$                 | 1.5418                                             |
| $2\theta$ range / °                  | 7.112 to 136.456                                   |
| Reflns collected                     | 7095                                               |
| Indep reflns/ $R_{\text{int}}$       | 2127/0.0427                                        |
| Params                               | 163                                                |
| GOF on $F^2$                         | 1.148                                              |
| $R_1, wR_2 [I > 2\sigma(I)]$         | 0.0323, 0.0846                                     |
| $R_1, wR_2 [\text{all data}]$        | 0.0324, 0.0847                                     |
| Max./Mini. Peak / e Å <sup>-3</sup>  | 0.41/−1.05                                         |
| Flack parameter                      | 0.031(11)                                          |

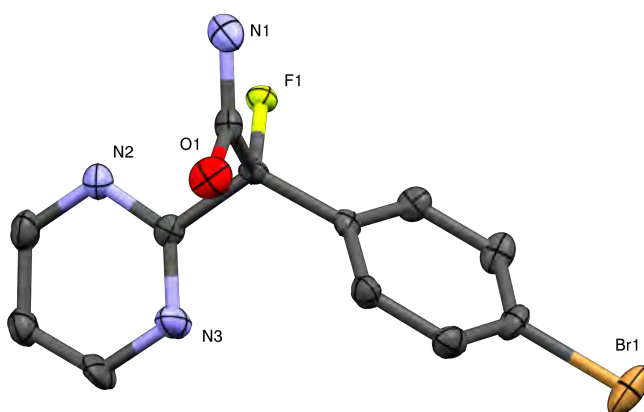

Figure S1. ORTEP drawing of (*S*)-**10** with 50% thermal ellipsoid. All hydrogen atoms are omitted for clarity.

## 10. Derivatization of Products

### 10-1. Derivatization of **2U**

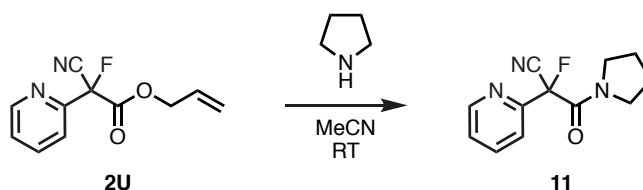

To an 8-mL glass tube equipped containing a magnetic stirring bar and **2U** (44.0 mg, 0.200 mmol, 1.0 equiv) were added pyrrolidine (71.8 mg, 1.00 mmol, 5.0 equiv) and MeCN (1.0 mL). The mixture was stirred at room temperature for 12 h. The mixture was concentrated *in vacuo*. The residue was purified by PTLC (chloroform /EtOAc = 9:1) to afford 2-fluoro-2-(pyridine-2-yl)-2-(pyrrolidin-1-yl)acetonitrile (**11**: 19.1 mg, 41% yield) as a white solid.  $^1\text{H}$  NMR (400 MHz,  $\text{CDCl}_3$ )  $\delta$  8.68 (d,  $J = 4.8$  Hz, 1H), 7.88 (td,  $J = 8.0, 2.0$  Hz, 1H), 7.73 (d,  $J = 8.0$  Hz, 1H), 7.45–7.42 (m, 1H), 3.68–3.53 (m, 4H), 1.97–1.81 (m, 4H);  $^{13}\text{C}$  NMR (101 MHz,  $\text{CDCl}_3$ )  $\delta$  159.7 (d,  $J_{\text{C-F}} = 23.3$  Hz), 151.5 (d,  $J_{\text{C-F}} = 23.2$  Hz), 149.8, 137.8, 125.4, 121.5 (d,  $J_{\text{C-F}} = 3.8$  Hz), 114.3 (d,  $J_{\text{C-F}} = 34.9$  Hz), 90.0 (d,  $J_{\text{C-F}} = 197.9$  Hz), 48.2, 47.0 (d,  $J_{\text{C-F}} = 6.9$  Hz), 26.5, 23.2;  $^{19}\text{F}$  NMR (376 MHz,  $\text{CDCl}_3$ )  $\delta$  -143.4; HRMS (ESI)  $m/z$  calcd for  $\text{C}_{12}\text{H}_{13}\text{FN}_3\text{O}$   $[\text{M}+\text{H}]^+$ : 234.1037 found 234.1036.

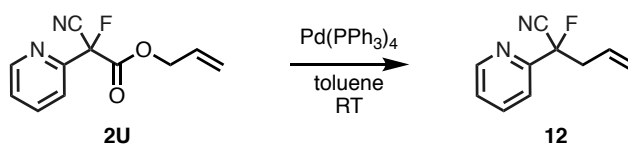

An 8-mL glass tube equipped with a screw cap containing a magnetic stirring bar was dried with a heat-gun *in vacuo* and filled with  $\text{N}_2$  gas after cooling to room temperature. To this tube were added **2U**

(22.0 mg, 0.100 mmol, 1.0 equiv) and Pd(PPh<sub>3</sub>)<sub>4</sub> (5.78 mg, 5.00 μmol, 5.0 mol%). The tube was placed under vacuum and refilled with N<sub>2</sub> gas three times. To this was added toluene (1.0 mL). The tube was sealed with a screw cap and then stirred at room temperature for 1 h. Then the mixture was passed through a short silica-gel pad with EtOAc as an eluent. The filtrate was concentrated *in vacuo*. The residue was purified by PTLC (chloroform/EtOAc = 9:1) to afford 2-fluoro-2-(pyridine-2-yl)pent-4-enenitrile (**12**: 35.2 mg, quant.) as a colorless oil. <sup>1</sup>H NMR (400 MHz, CDCl<sub>3</sub>) δ 8.67 (d, *J* = 4.4 Hz, 1H), 7.83 (td, *J* = 8.0, 2.0 Hz, 1H), 7.58 (d, *J* = 8.0 Hz, 1H), 7.37 (dd, *J* = 8.0, 4.4 Hz, 1H), 5.86–5.76 (m, 1H), 5.30–5.26 (m, 2H), 3.22–2.99 (m, 2H); <sup>13</sup>C NMR (101 MHz, CDCl<sub>3</sub>) δ 154.0 (d, *J*<sub>C-F</sub> = 26.2 Hz), 149.6, 137.4, 128.4 (d, *J*<sub>C-F</sub> = 2.9 Hz), 124.6, 122.1, 119.6 (d, *J*<sub>C-F</sub> = 6.8 Hz), 116.5 (d, *J*<sub>C-F</sub> = 33.9 Hz), 91.2 (d, *J*<sub>C-F</sub> = 188.2 Hz), 43.8 (d, *J*<sub>C-F</sub> = 24.2 Hz); <sup>19</sup>F NMR (376 MHz, CDCl<sub>3</sub>) δ -155.1 (t, *J*<sub>H-F</sub> = 23.5 Hz); HRMS (ESI) *m/z* calcd for C<sub>10</sub>H<sub>10</sub>FN<sub>2</sub> [M+H]<sup>+</sup>: 177.0823 found 177.0823.

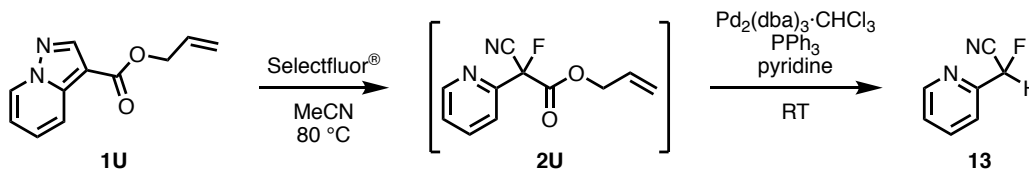

An 8-mL glass tube equipped with a screw cap containing a magnetic stirring bar was dried with a heat-gun *in vacuo* and filled with N<sub>2</sub> gas after cooling to room temperature. To this tube were added **1U** (37.6 mg, 0.200 mmol, 1.0 equiv) and Selectfluor<sup>®</sup> (70.8 mg, 0.200 mmol, 1.0 equiv). The tube was placed under vacuum and refilled N<sub>2</sub> gas three times. To this was added MeCN (1.0 mL). The tube was sealed with a screw cap and then heated at 80 °C for 24 h with stirring. After cooling the reaction mixture to room temperature, pyridine (48.3 μL, 0.600 mmol, 3.0 equiv) was added. After this mixture was stirred for 10 min, Pd<sub>2</sub>(dba)<sub>3</sub>·CHCl<sub>3</sub> (10.4 mg, 10.0 μmol, 5.0 mol%), PPh<sub>3</sub> (10.5 mg, 40.0 μmol, 20 mol%) were added. The mixture was further stirred at room temperature for 1 h, passed through a short silica-gel pad with EtOAc as an eluent, and then concentrated *in vacuo*. The residue was purified by PTLC (hexane/EtOAc = 8:1) to afford 2-fluoro-2-(pyridine-2-yl)acetonitrile (**13**: 25.0 mg, 92% yield) as a colorless oil. <sup>1</sup>H NMR (400 MHz, CDCl<sub>3</sub>) δ 8.69 (d, *J* = 4.0 Hz, 1H), 7.88 (td, *J* = 7.6, 1.6 Hz, 1H), 7.63 (d, *J* = 7.6 Hz, 1H), 7.47–7.40 (m, 1H), 6.18 (d, *J*<sub>H-F</sub> = 46.4 Hz, 1H); <sup>13</sup>C NMR (101 MHz, CDCl<sub>3</sub>) δ 150.7 (d, *J*<sub>C-F</sub> = 23.1 Hz), 150.0, 137.7, 125.3, 121.1 (d, *J*<sub>C-F</sub> = 3.8 Hz), 114.6 (d, *J*<sub>C-F</sub> = 31.8 Hz), 80.5 (d, *J*<sub>C-F</sub> = 184.8 Hz); <sup>19</sup>F NMR (376 MHz, CDCl<sub>3</sub>) δ -182.0 (d, *J*<sub>F-H</sub> = 46.2 Hz); HRMS (ESI) *m/z* calcd for C<sub>7</sub>H<sub>6</sub>FN<sub>2</sub> [M+H]<sup>+</sup>: 137.0510 found 137.0511.

## 10-2. Derivatization of 2A

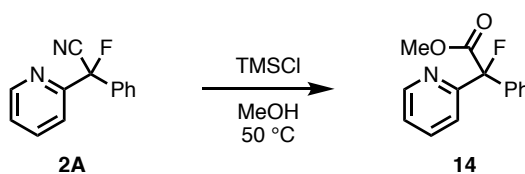



An 8-mL glass tube equipped with a screw cap containing a magnetic stirring bar was dried with a heat-gun *in vacuo* and filled with N<sub>2</sub> after cooling to room temperature. To this tube were added **2A** (42.5 mg, 0.200 mmol, 1.0 equiv), chlorotrimethylsilane (130  $\mu$ L, 1.00 mmol, 5.0 equiv), and MeOH (1.0 mL). The tube was sealed with a screw cap and then heated at 50  $^{\circ}$ C for 6 h with stirring. The reaction was quenched with NaHCO<sub>3</sub> aq. and the mixture was extracted with EtOAc and washed with brine. The combined organic layer was dried over Na<sub>2</sub>SO<sub>4</sub>, filtered, and concentrated *in vacuo*. The residue was purified by PTLC (hexane/EtOAc = 5:1) to afford methyl 2-fluoro-2-phenyl-2-(pyridine-2-yl)acetate (**14**: 40.1 mg, 82% yield) as a colorless oil. <sup>1</sup>H NMR (400 MHz, CDCl<sub>3</sub>)  $\delta$  8.66 (dd,  $J$  = 5.2, 1.2 Hz, 1H), 7.72 (td,  $J$  = 8.0, 1.2 Hz, 1H), 7.55–7.51 (m, 2H), 7.41–7.37 (m, 4H), 7.31 (ddd,  $J$  = 8.0, 5.2, 0.8 Hz, 1H), 3.88 (s, 3H); <sup>13</sup>C NMR (101 MHz, CDCl<sub>3</sub>)  $\delta$  169.3 (d,  $J_{C-F}$  = 27.1 Hz), 157.7 (d,  $J_{C-F}$  = 24.2 Hz), 149.0, 137.0, 136.9 (d,  $J_{C-F}$  = 23.2 Hz), 128.9, 128.1, 126.5 (d,  $J_{C-F}$  = 7.8 Hz), 123.8, 121.9 (d,  $J_{C-F}$  = 4.8 Hz), 97.8 (d,  $J_{C-F}$  = 190.1 Hz), 53.2; <sup>19</sup>F NMR (376 MHz, CDCl<sub>3</sub>)  $\delta$  -147.3; HRMS (ESI)  $m/z$  calcd for C<sub>14</sub>H<sub>13</sub>FNO<sub>2</sub> [M+H]<sup>+</sup>: 246.0925 found 246.0924.

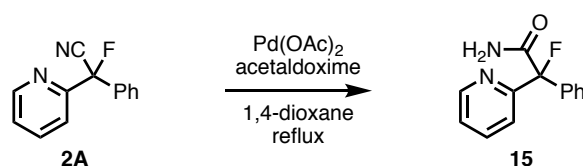

To an 8-mL glass tube containing a magnetic stirring bar and **2A** (41.9 mg, 0.200 mmol, 1.0 equiv) were added Pd(OAc)<sub>2</sub> (1.80 mg, 8.00  $\mu$ mol, 4.0 mol%), acetaldoxime (120  $\mu$ L, 2.00 mmol, 10 equiv), and 1,4-dioxane (2.0 mL). After the mixture was stirred with refluxing for 1 h, the crude mixture was concentrated *in vacuo*, and the resulting residue was purified by Isolera<sup>®</sup> (hexane/EtOAc = 4:1 to 1:1) to afford 2-fluoro-2-phenyl-2-(pyridine-2-yl)acetamide (**15**: 42.4 mg, 92% yield) as a white solid. <sup>1</sup>H NMR (400 MHz, CDCl<sub>3</sub>)  $\delta$  8.68 (dd,  $J$  = 4.8, 0.8 Hz, 1H), 7.74 (t,  $J$  = 7.6 Hz, 1H), 7.60–7.58 (m, 2H), 7.48 (dd,  $J$  = 7.6, 0.8 Hz, 1H), 7.42–7.36 (m, 3H), 7.32 (ddd,  $J$  = 7.6, 4.8, 0.8 Hz, 1H), 7.26 (brs, 1H), 5.77 (brs, 1H); <sup>13</sup>C NMR (101 MHz, CDCl<sub>3</sub>)  $\delta$  171.0 (d,  $J_{C-F}$  = 24.0 Hz), 157.4 (d,  $J_{C-F}$  = 24.0 Hz), 149.0, 137.4 (d,  $J_{C-F}$  = 22.1 Hz), 137.0, 129.0, 128.3, 126.5 (d,  $J_{C-F}$  = 7.7 Hz), 123.7, 122.1 (d,  $J_{C-F}$  = 6.8 Hz), 97.8 (d,  $J_{C-F}$  = 188.7 Hz); <sup>19</sup>F NMR (376 MHz, CDCl<sub>3</sub>)  $\delta$  -144.8; HRMS (ESI)  $m/z$  calcd for C<sub>13</sub>H<sub>11</sub>FN<sub>2</sub>O [M+H]<sup>+</sup>: 231.0928 found 231.0927.

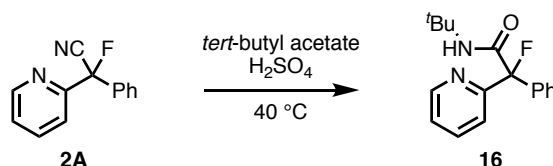

To an 8-mL glass tube containing a magnetic stirring bar and **2A** (42.4 mg, 0.200 mmol, 1.0 equiv) were added *tert*-butyl acetate (161  $\mu$ L, 1.20 mmol, 6.0 equiv) and conc. H<sub>2</sub>SO<sub>4</sub> (10  $\mu$ L, 0.200 mmol, 1.0 equiv). The mixture was stirred at 40  $^{\circ}$ C for 2 h. After cooling to room temperature, the mixture was

poured into cold NaHCO<sub>3</sub> aq. to neutralize and extracted with EtOAc. The combined organic layer was dried over Na<sub>2</sub>SO<sub>4</sub>, filtered, and concentrated *in vacuo*. The residue was purified by PTLC (hexane/EtOAc = 4:1) to afford *N*-(*tert*-butyl)-2-fluoro-2-phenyl-2-(pyridine-2-yl)acetamide (**16**: 53.8 mg, 94% yield) as a white solid. <sup>1</sup>H NMR (400 MHz, CDCl<sub>3</sub>) δ 8.65 (d, *J* = 4.4 Hz, 1H), 7.69 (td, *J* = 7.6, 1.6 Hz, 1H), 7.59–7.51 (m, 2H), 7.44 (dd, *J* = 7.6, 1.2 Hz, 1H), 7.40–7.36 (m, 3H), 7.29–7.25 (m, 1H), 7.05 (brs, 1H), 1.40 (s, 9H); <sup>13</sup>C NMR (101 MHz, CDCl<sub>3</sub>) δ 167.3 (d, *J*<sub>C-F</sub> = 22.1 Hz), 157.9 (d, *J*<sub>C-F</sub> = 23.1 Hz), 148.9, 138.2 (d, *J*<sub>C-F</sub> = 22.2 Hz), 136.7, 128.8, 128.2, 126.7 (d, *J*<sub>C-F</sub> = 7.7 Hz), 123.4, 122.4 (d, *J*<sub>C-F</sub> = 4.8 Hz), 97.6 (d, *J*<sub>C-F</sub> = 190.7 Hz), 51.6, 28.6; <sup>19</sup>F NMR (376 MHz, CDCl<sub>3</sub>) δ -144.0; HRMS (ESI) *m/z* calcd for C<sub>17</sub>H<sub>20</sub>FN<sub>2</sub>O [M+H]<sup>+</sup>: 287.1554 found 287.1552.

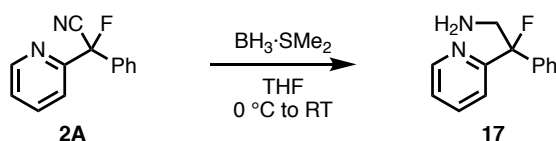

To a solution of **2A** (42.4 mg, 0.200 mmol, 1.0 equiv) in THF (1.0 mL) was added BH<sub>3</sub>·SMe<sub>2</sub> (57.0 μL, 0.600 mmol, 3.0 equiv) dropwise at 0 °C. After stirring the mixture at room temperature for 19 h the reaction was quenched with MeOH carefully at 0 °C and concentrated *in vacuo*. To this residue were added MeOH (1.0 mL) and adjusted to pH = 2 with conc. HCl aq. at 0 °C. After stirring the mixture at room temperature for 12 h, solvent was removed *in vacuo*. The residue was adjusted to pH = 8 with NaHCO<sub>3</sub> aq., extracted with EtOAc, and washed with brine. The combined organic layer was dried over Na<sub>2</sub>SO<sub>4</sub>, filtered, and concentrated *in vacuo*. The residue was purified by PTLC (chloroform/EtOAc = 8:1) to afford 2-fluoro-2-phenyl-2-(pyridine-2-yl)ethan-1-amine (**17**: 17.7 mg, 41% yield) as a colorless oil. <sup>1</sup>H NMR (400 MHz, CDCl<sub>3</sub>) δ 8.62 (dd, *J* = 4.8, 1.2 Hz, 1H), 7.72–7.67 (m, 1H), 7.56 (dd, *J* = 7.6, 1.2 Hz, 1H), 7.51–7.48 (m, 2H), 7.34 (t, *J* = 7.6 Hz, 2H), 7.29–7.25 (m, 1H), 7.22–7.19 (m, 1H), 3.75 (dd, *J*<sub>H-F</sub> = 26.8 Hz, *J* = 14.4 Hz, 1H), 3.47 (dd, *J*<sub>H-F</sub> = 20.0 Hz, *J* = 14.4 Hz, 1H), 1.46 (brs, 2H); <sup>13</sup>C NMR (101 MHz, CDCl<sub>3</sub>) δ 160.5 (d, *J*<sub>C-F</sub> = 27.9 Hz), 148.8, 141.0 (d, *J*<sub>C-F</sub> = 23.1 Hz), 137.0, 128.4, 127.9, 125.0 (d, *J*<sub>C-F</sub> = 9.6 Hz), 122.7, 121.1 (d, *J*<sub>C-F</sub> = 8.7 Hz), 100.6 (d, *J*<sub>C-F</sub> = 176.2 Hz), 50.9 (d, *J*<sub>C-F</sub> = 23.1 Hz); <sup>19</sup>F NMR (376 MHz, CDCl<sub>3</sub>) δ -166.0 (t, *J*<sub>F-H</sub> = 22.6 Hz); HRMS (ESI) *m/z* calcd for C<sub>13</sub>H<sub>14</sub>FN<sub>2</sub> [M+H]<sup>+</sup>: 217.1136 found 217.1134.

## 11. References

- [1] Alam, K.; Kim, S. M.; Kim, D. J.; Park, J. K. Development of Structurally Diverse *N*-Heterocyclic Carbene Ligands via Palladium-Copper-Catalyzed Decarboxylative Arylation of Pyrazolo[1,5-*a*]pyridine-3-carboxylic Acid. *Adv. Synth. Catal.* **2016**, *358*, 2661–2670.
- [2] Wu, H. C.; Chu, J. H.; Li, C. W.; Hwang, L. C.; Wu, M. J. Palladium-Catalyzed Regioselective Arylation of Pyrazolo[1,5-*a*]pyridines via C–H Activation and Synthetic Applications on P38 Kinase Inhibitors. *Organometallics* **2016**, *35*, 288–300.
- [3] Ravi, C.; Samanta, S.; Mohan, D. C.; Reddy, N. N. K.; Adimurthy, S. Synthesis of Functionalized Pyrazolo[1,5-*a*]pyridines: [3+2] Cycloaddition of *N*-Aminopyridines and  $\alpha,\beta$ -Unsaturated Carbonyl Compounds/Alkenes at Room Temperature. *Synthesis* **2017**, *49*, 2513–2522.
- [4] Balkenhohl, M.; Salgues, B.; Hirai, T.; Karaghiosoff, K.; Knochel, P. Regioselective Metalation and Functionalization of the Pyrazolo[1,5-*a*]pyridine Scaffold Using Mg- and Zn-TMP Bases. *Org. Lett.* **2018**, *20*, 3114–3118.
- [5] Bedford, R. B.; Durrant, S. J.; Montgomery, M. Catalyst-Switchable Regiocontrol in the Direct Arylation of Remote C–H Groups in Pyrazolo[1,5-*a*]pyrimidines. *Angew. Chem., Int. Ed.* **2015**, *127*, 8911–8914.
- [6] Benchikh, E.; Fitzgerald, S. P.; Lowry, P. A.; Connell, I. R. Immunodetection and Quantification of Pyrazolopyrimidine Sedatives. Patent WO2011007180A1, January 20, **2011**.
- [7] Bach Taña, J.; Pages Santacana, L. M.; Taltavull Moll, J.; Eastwood, P. R.; Gonzalez Rodrigues, J.; Giulio Matassa, V. Pyrazole Derivatives as JAK Inhibitors. Patent WO2011101161A1, August 25, **2011**.
- [8] Bethel, P. A.; Campbell, A. D.; Goldberg, F. W.; Kemmitt, P. D.; Lamont, G. M.; Suleman, A. Optimized Scale up of 3-Pyrimidinylpyrazolo[1,5-*a*]pyridine via Suzuki Coupling; A General Method of Accessing a Range of 3-(Hetero)arylpyrazolo[1,5-*a*]pyridines. *Tetrahedron* **2012**, *68*, 5434–5444.
- [9] Ripka, A.; Shapiro, G.; Mcriner, A. J.; Bursavich, M. G. Imidazotriazinone Compounds as PDE9 Inhibitors and Their Preparation. Patent WO2013142269A1, September 26, **2013**.
- [10] Li, J.; Zhang, P.; Jiang, M.; Yang, H.; Zhao, Y.; Fu, H. Visible Light as a Sole Requirement for Intramolecular C(sp<sup>3</sup>)-H Imination. *Org. Lett.* **2017**, *19*, 1994–1997.
- [11] Stanton, M. G.; Noucti, N.; Sloman, D. J.; Munoz, B.; Lim, J. Pyrazolo[1,5-*a*]pyrimidine Derivatives. Patent WO2009014620A1, January 29, **2009**.
- [12] Lindsay-Scott, P. J.; Charlesworth, N. G.; Grozavu, A. A Flexible Strategy for the Regiocontrolled Synthesis of Pyrazolo[1,5-*a*]pyrazines. *J. Org. Chem.* **2017**, *82*, 11295–11303.
- [13] Velankar, A. D.; Quintini, G.; Prabhu, A.; Weber, A.; Hunaeus, G.; Volland, B.; Wuest, M.; Orjeda, C.; Harel, D.; Varghese, S.; Gore, V.; Patil, M.; Gayke, D.; Herdemann, M.; Heit, I.; Zaliani, A. Synthesis and Biological Evaluation of Novel (4 or 5-Aryl)pyrazolyl-indoles as Inhibitors of Interleukin-2 Inducible T-Cell Kinase (ITK). *Bioorg. Med. Chem.* **2010**, *18*, 4547–4559.

- [14] Luo, Y.; Zhang, H.; Wang, S.; Zhou, Y.; Dong, S.; Feng, X. Asymmetric Catalytic Diverse Ring Opening/Cycloadditions of Cyclobutenones with (*E*)-Alkenyloxindoles and (*E*)-Dioxopyrrolidines. *Org. Lett.* **2020**, *22*, 2645–2650.
- [15] Rauniyar, V.; Lackner, A. D.; Hamilton, G. L.; Toste, F. D. Asymmetric Electrophilic Fluorination Using an Anionic Chiral Phase-Transfer Catalyst. *Science* **2011**, *334*, 1681–1684.
- [16] Nakamura, M.; Hajra, A.; Endo, K.; Nakamura, E. Synthesis of Chiral  $\alpha$ -Fluoroketones Through Catalytic Enantioselective Decarboxylation. *Angew. Chem., Int. Ed.* **2005**, *44*, 7248–7251.
- [17] Sheldrick, G. M. SHTLXT – Integrated Space-Group and Crystal-Structure Determination. *Acta Cryst.* **2015**, *A71*, 3–8.
- [18] Sheldrick, G. M. Crystal Structure Refinement with SHELXL. *Acta Cryst.* **2015**, *C71*, 3–8.
- [19] Dolomanov, O. V.; Bourhis, L. J.; Gildea, R. J.; Howard, J. A. K.; Puschmann, H. OLEX2: A Complete Structure Solution, Refinement and Analysis Program. *J. Appl. Crystallogr.* **2009**, *42*, 339–341.

# 12. <sup>1</sup>H, <sup>13</sup>C, and <sup>19</sup>F NMR Spectra

<sup>1</sup>H NMR of 1D (400 MHz, CDCl<sub>3</sub>)

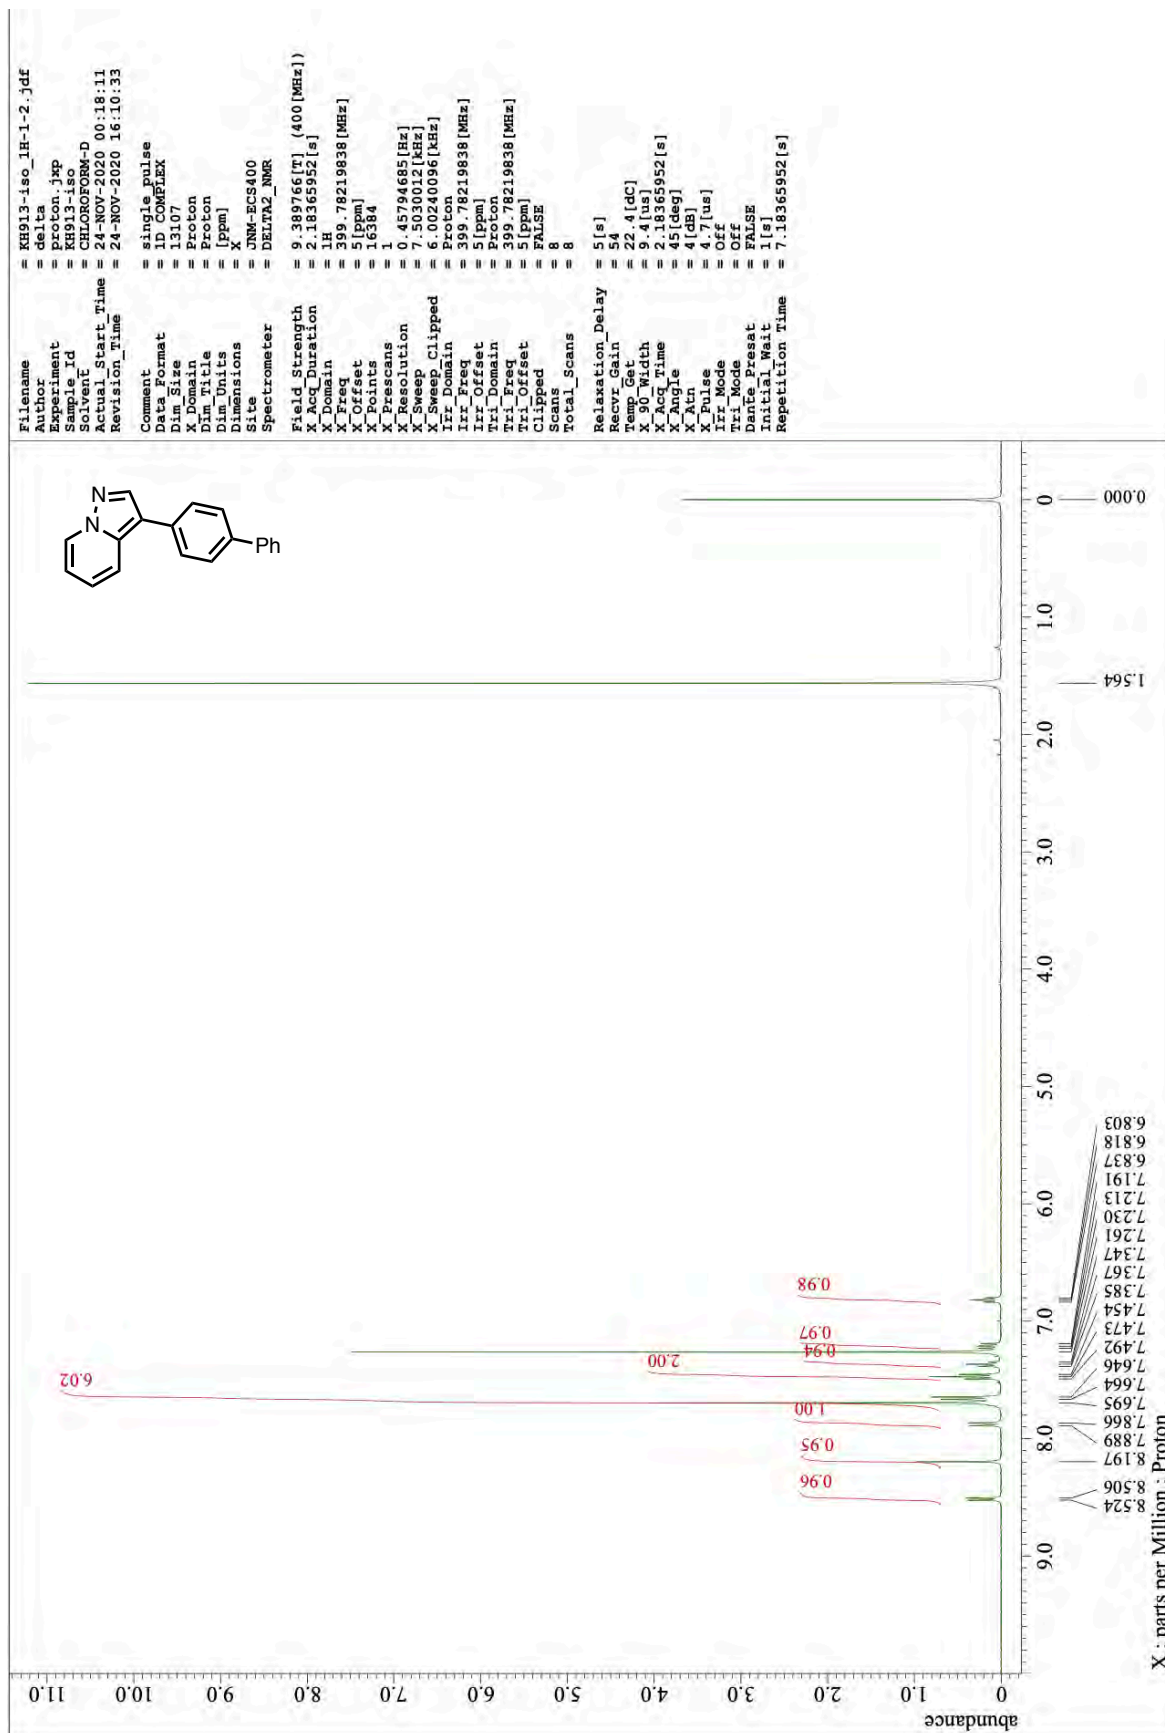

<sup>13</sup>C NMR of **1D** (101 MHz, CDCl<sub>3</sub>)

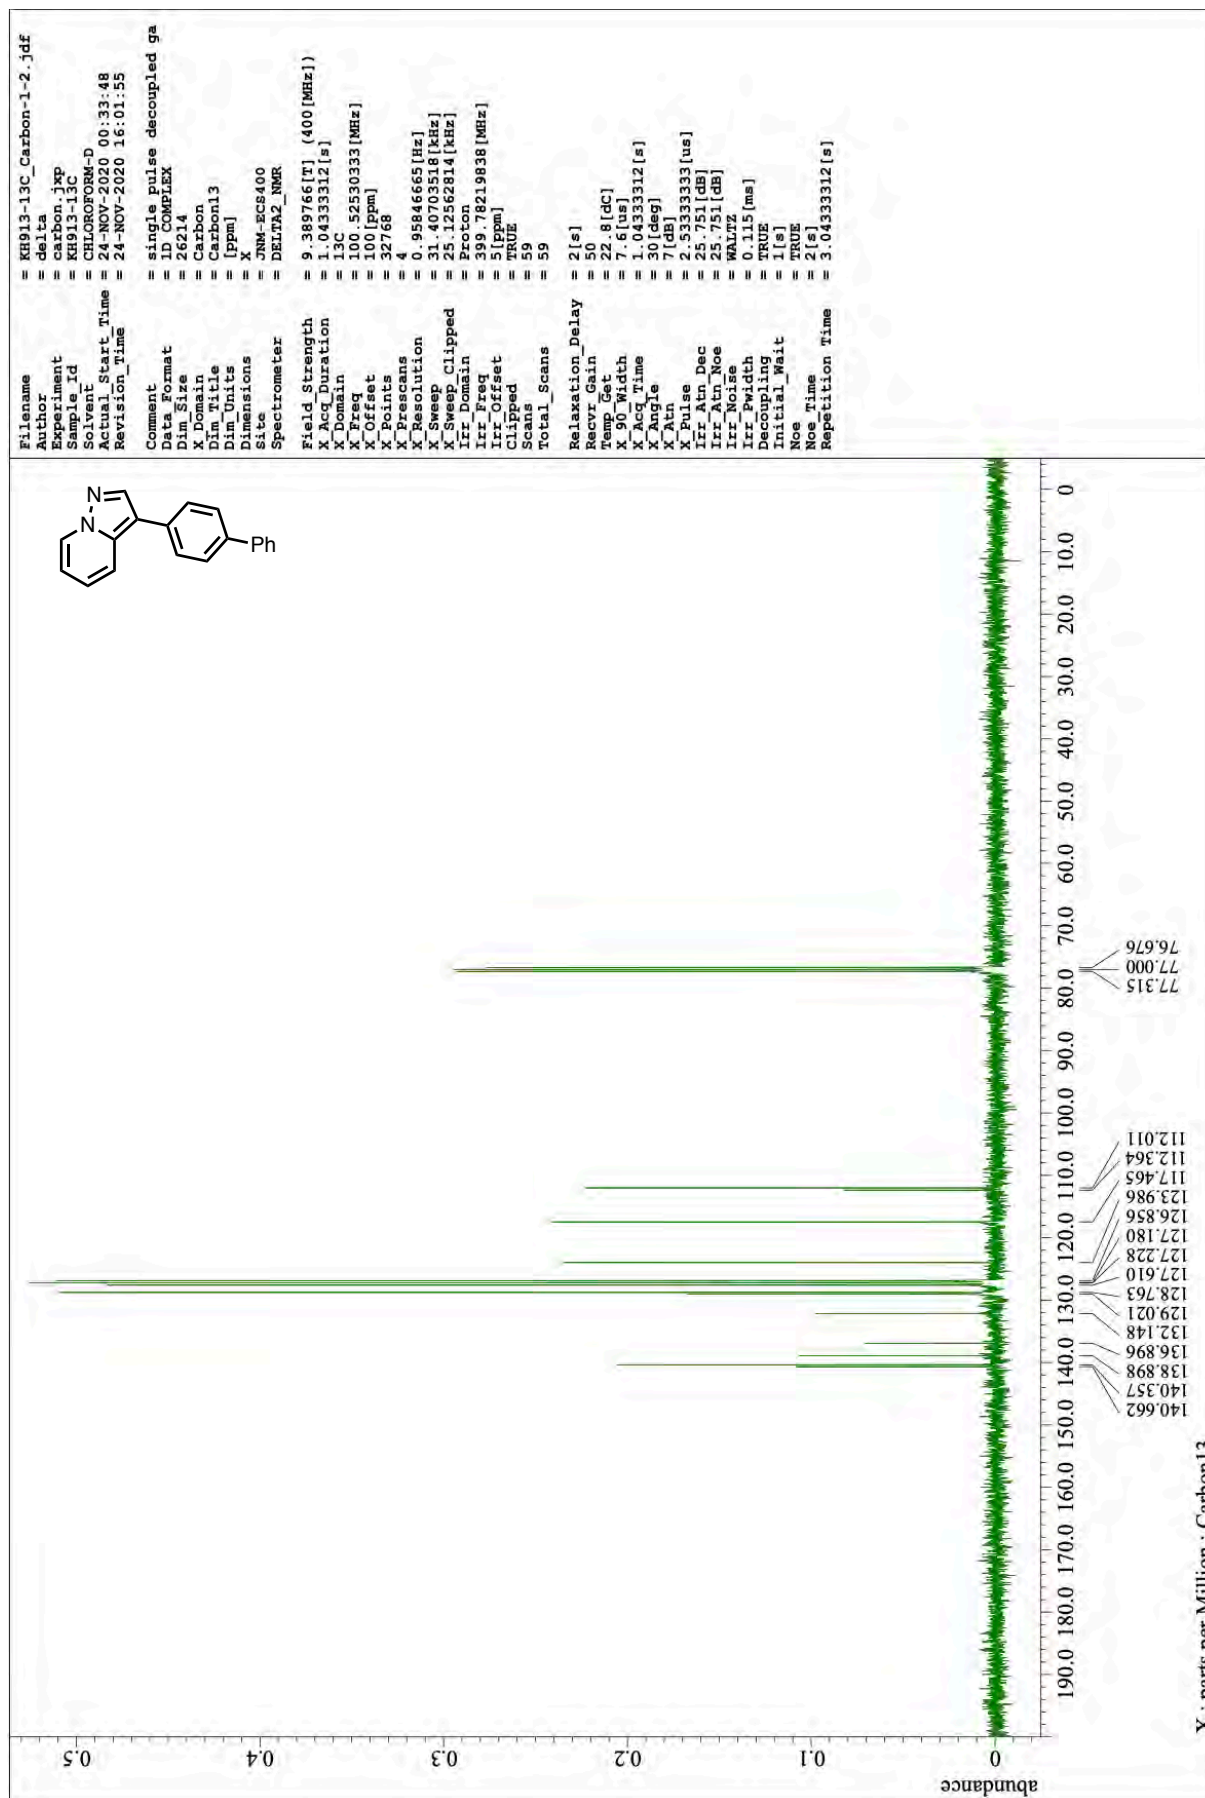

<sup>1</sup>H NMR of 1G (400 MHz, CDCl<sub>3</sub>)

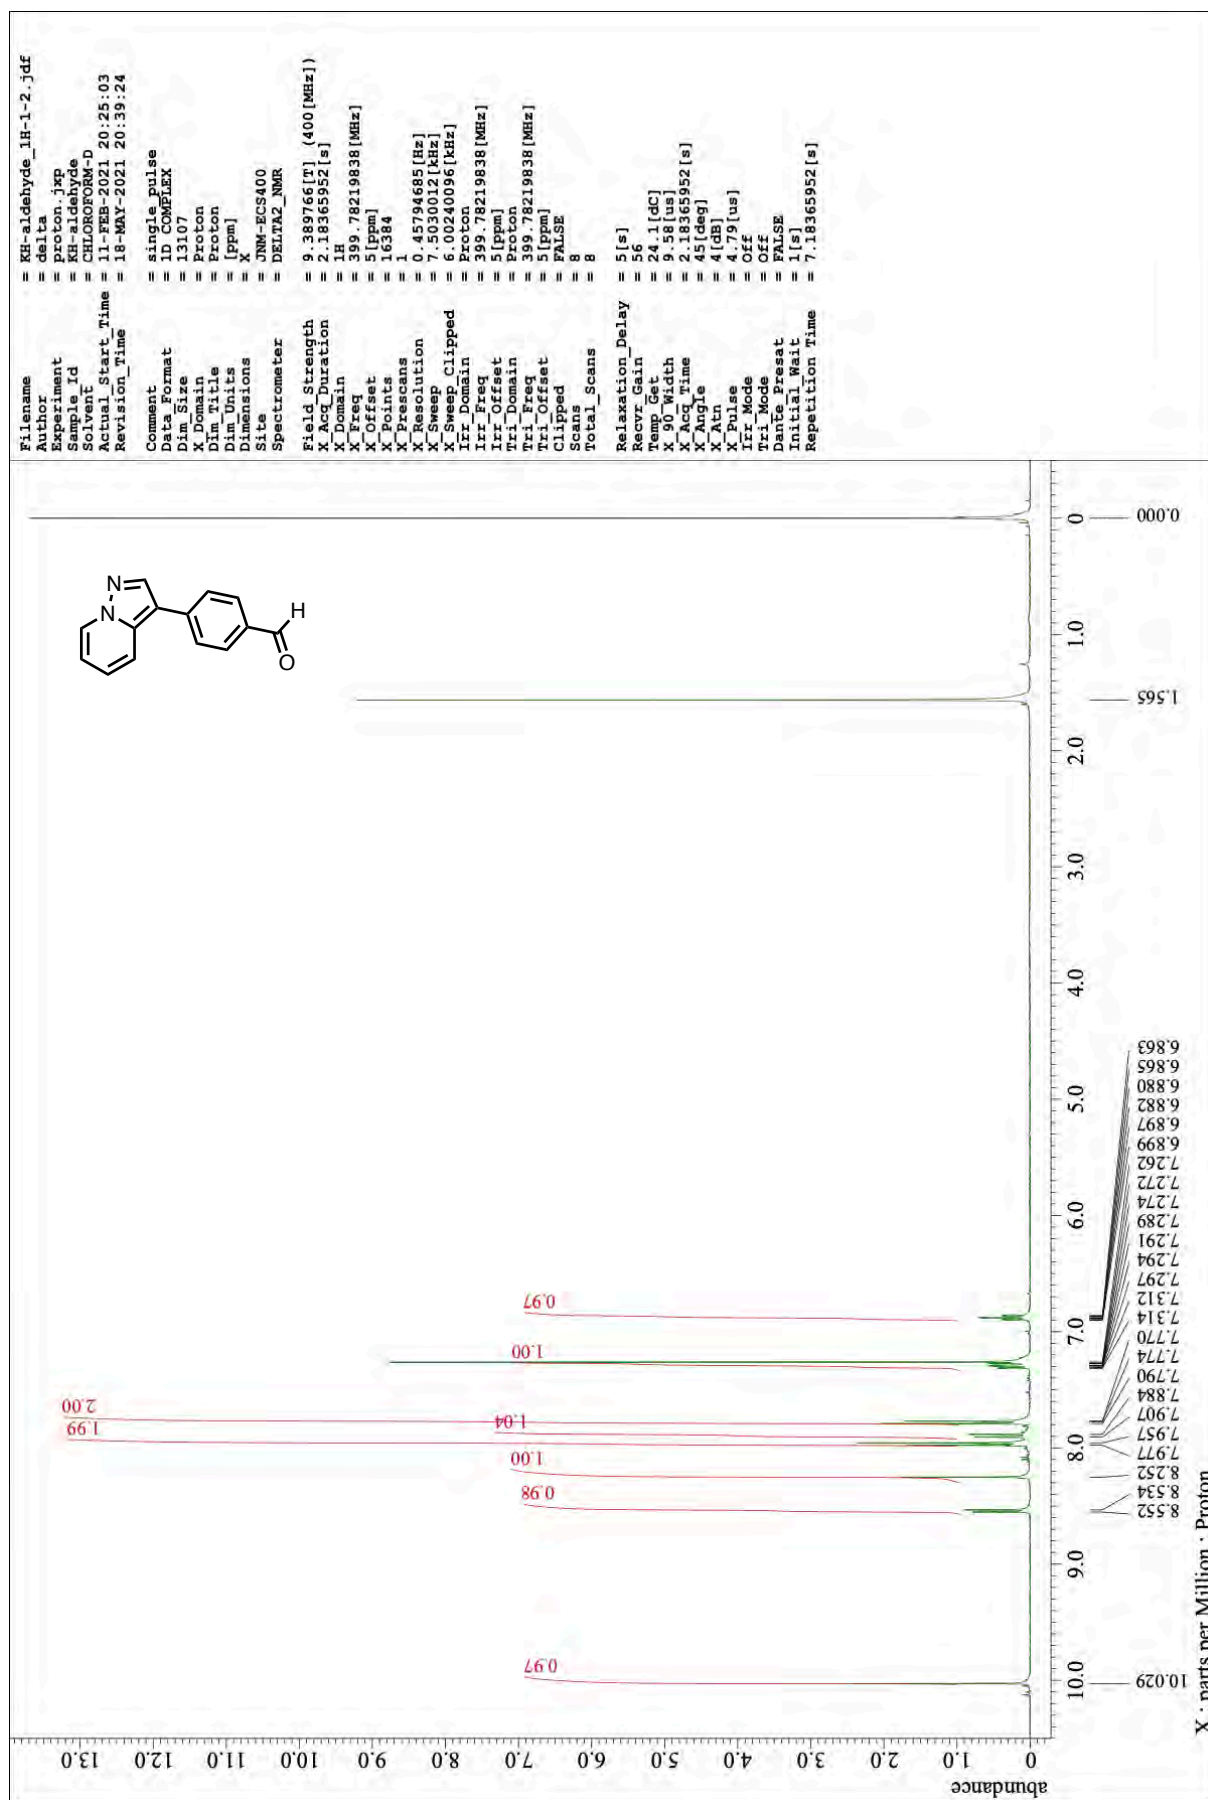

<sup>13</sup>C NMR of 1G (101 MHz, CDCl<sub>3</sub>)

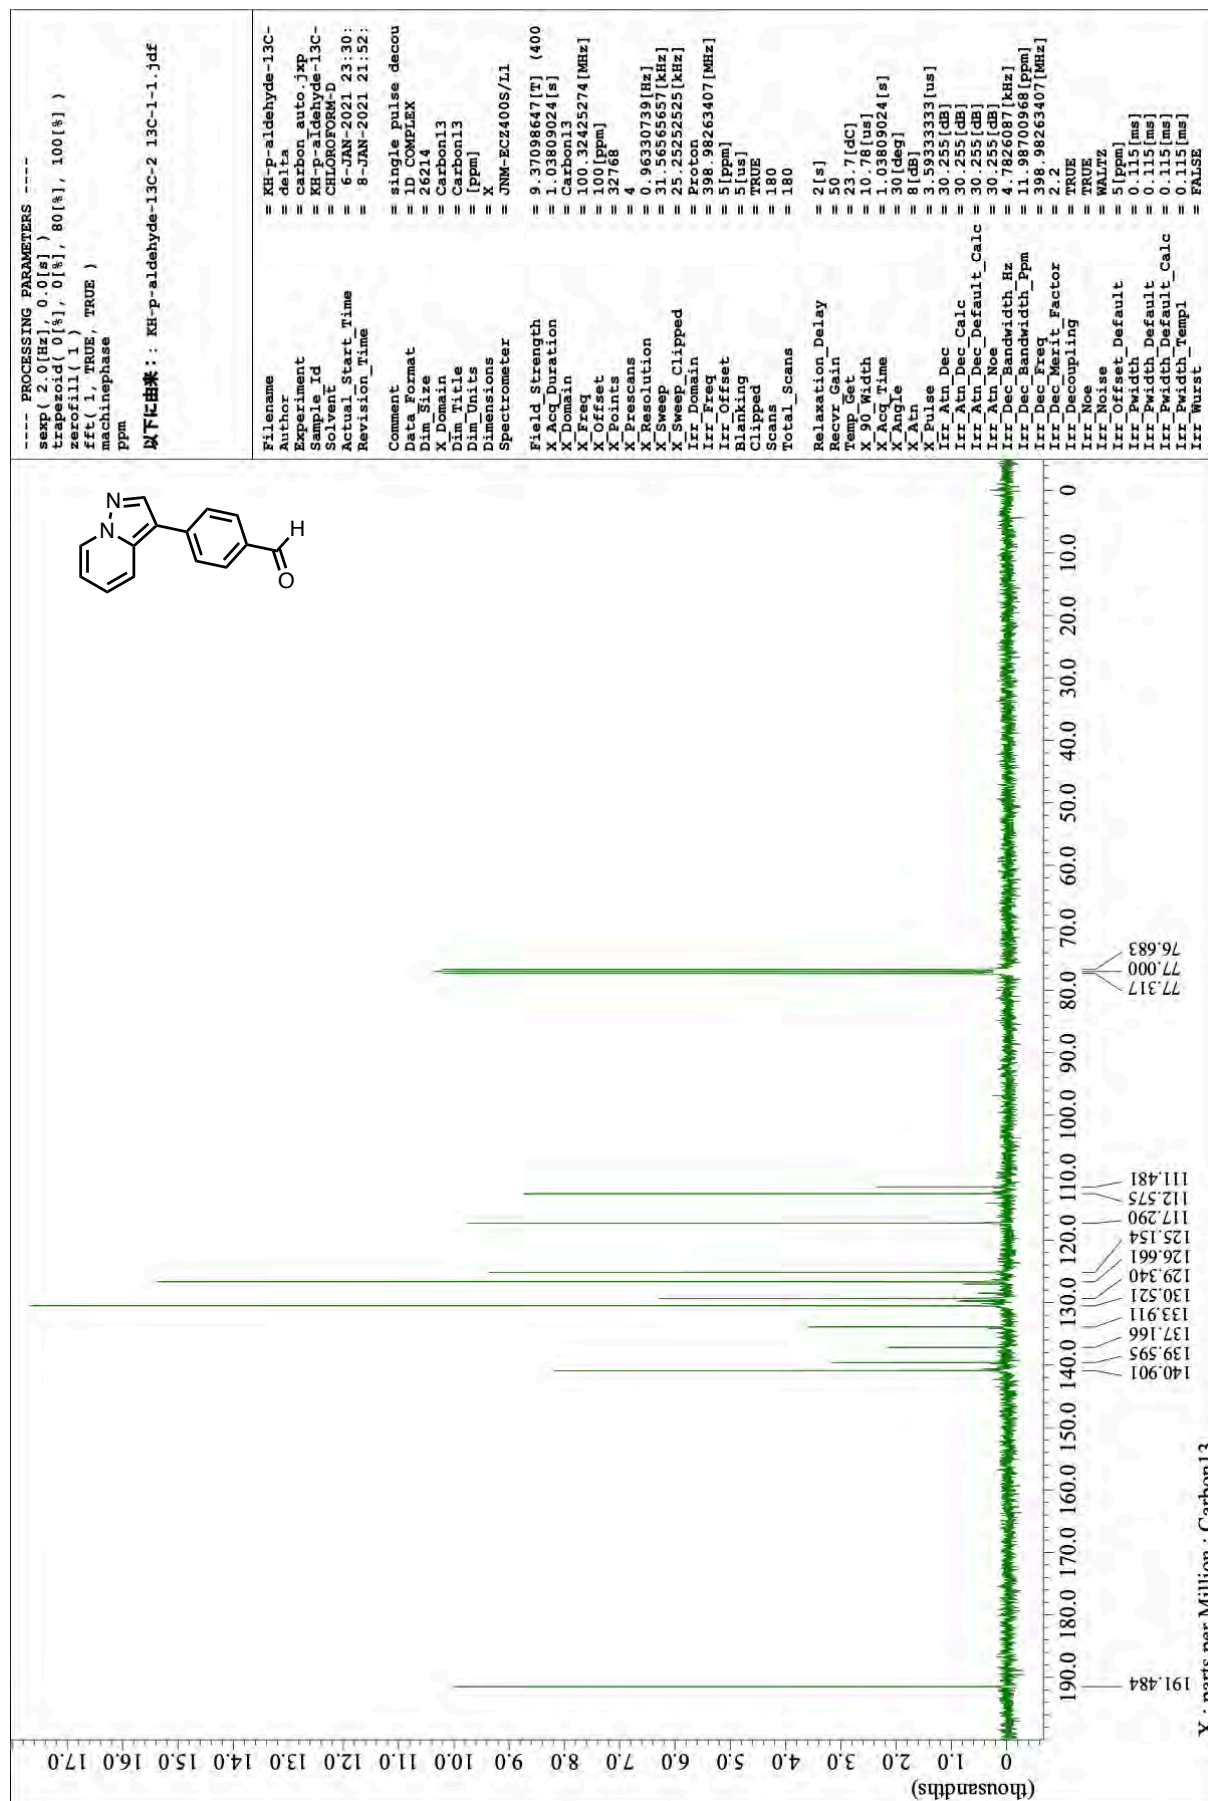



<sup>1</sup>H NMR of 1H (400 MHz, CDCl<sub>3</sub>)

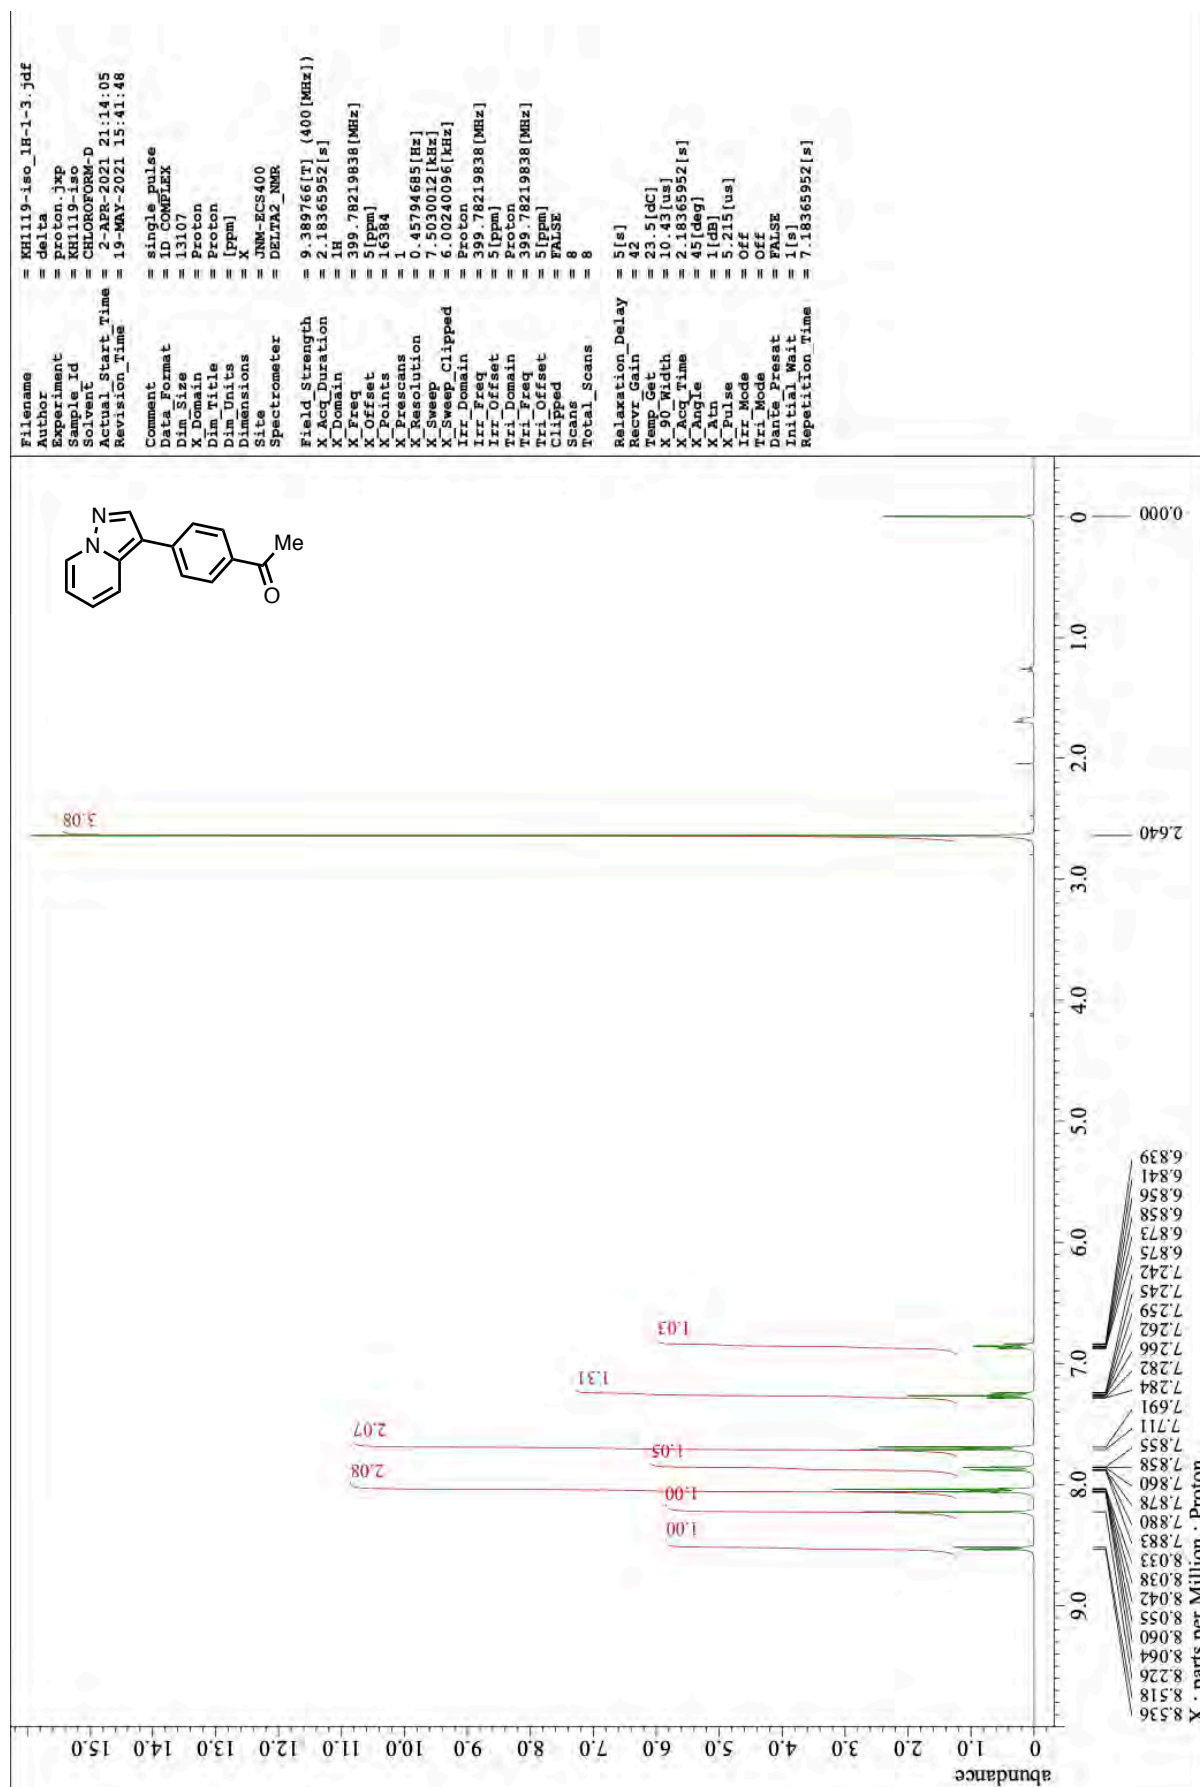

<sup>13</sup>C NMR of **1H** (101 MHz, CDCl<sub>3</sub>)

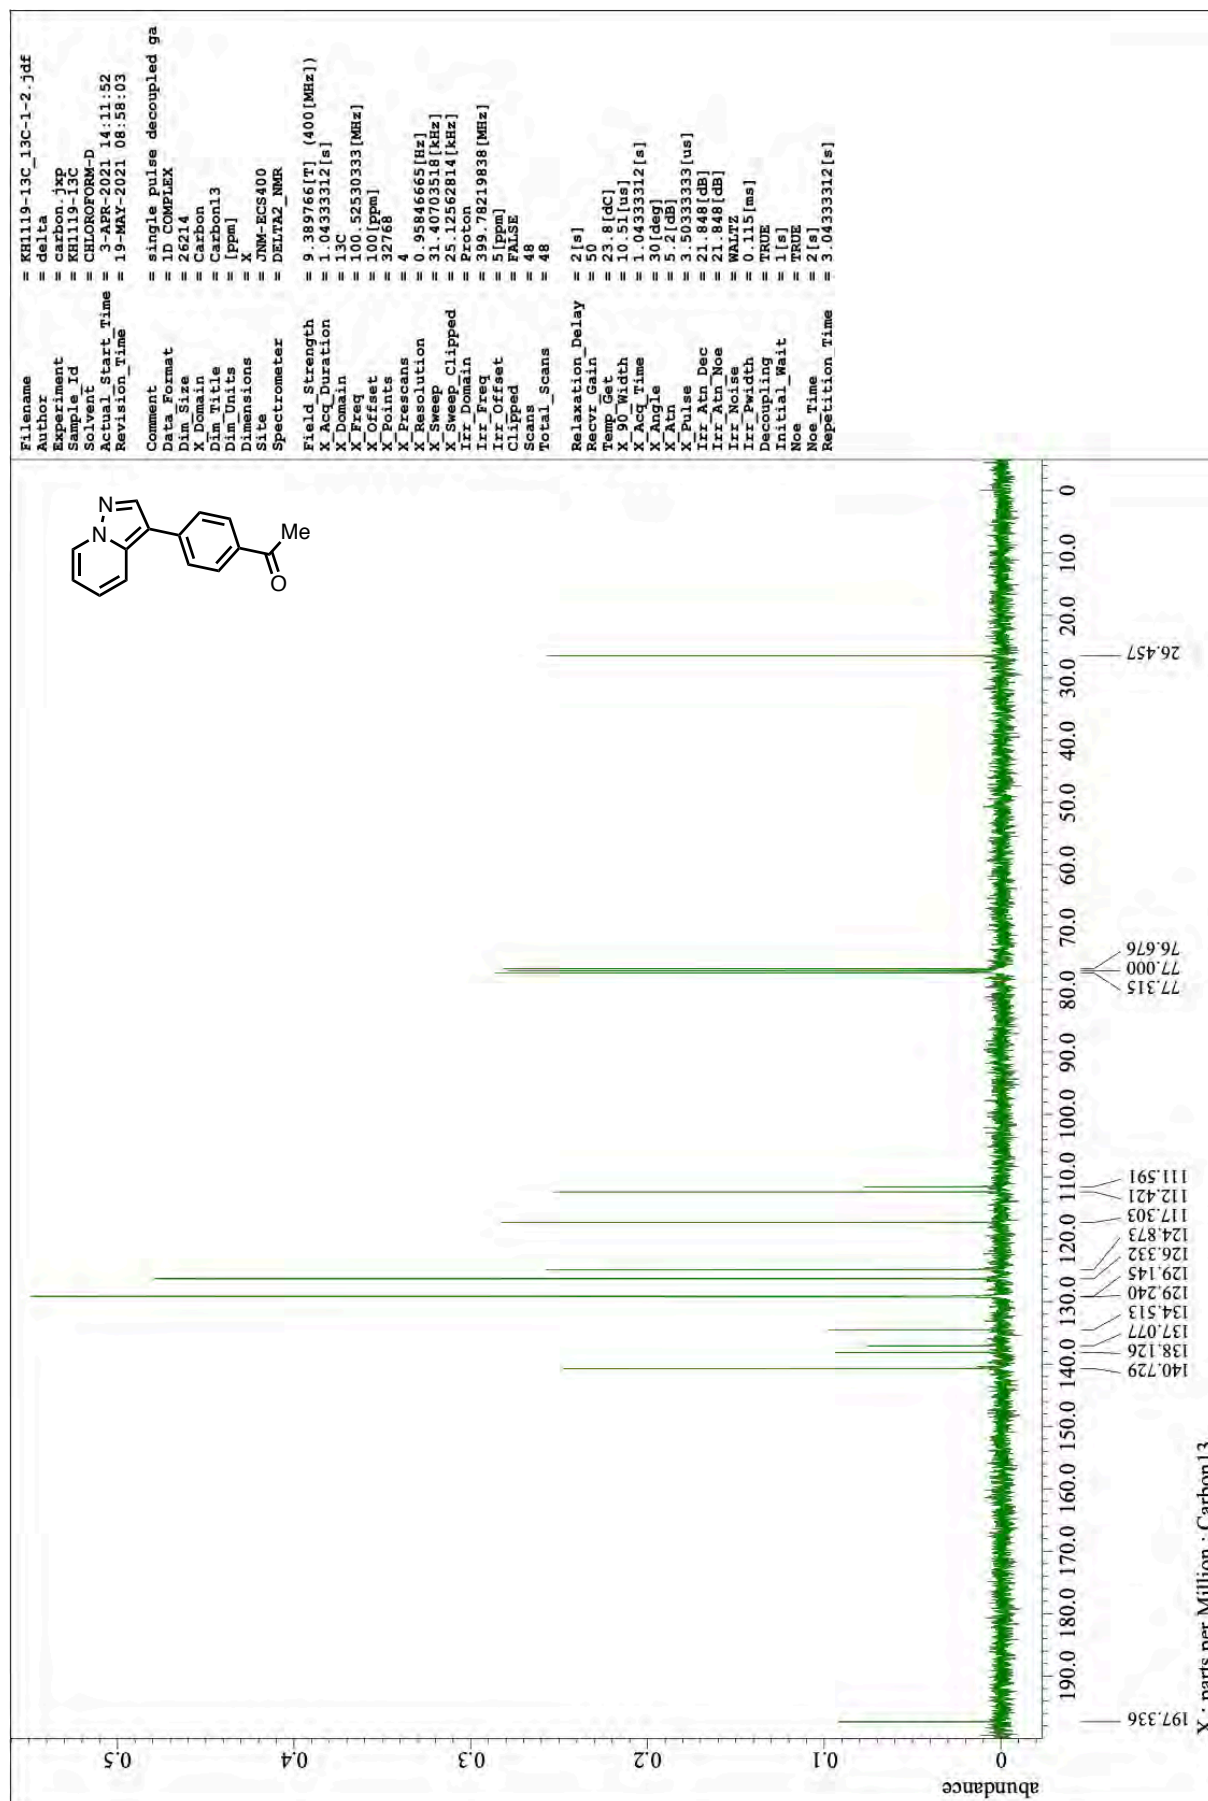

<sup>1</sup>H NMR of 1K (400 MHz, CDCl<sub>3</sub>)

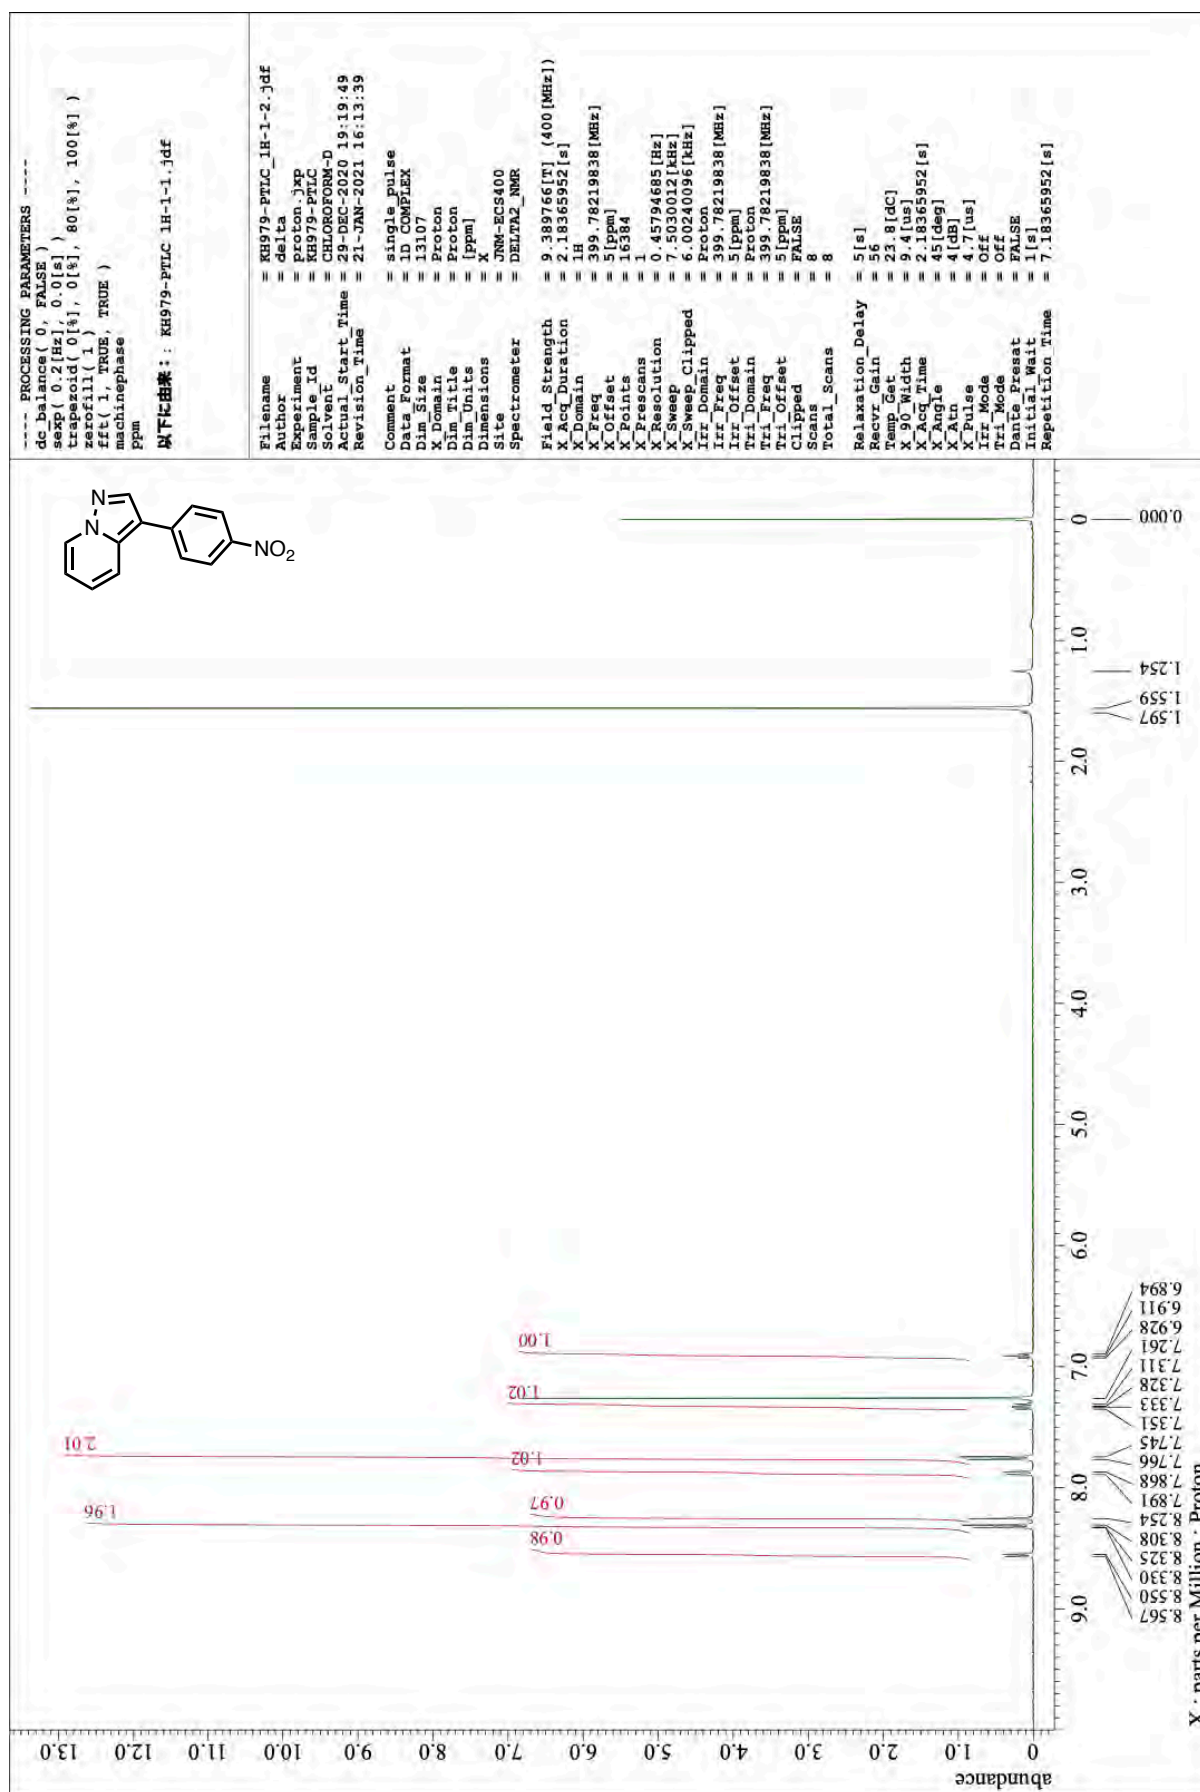

<sup>13</sup>C NMR of **1K** (101 MHz, CDCl<sub>3</sub>)

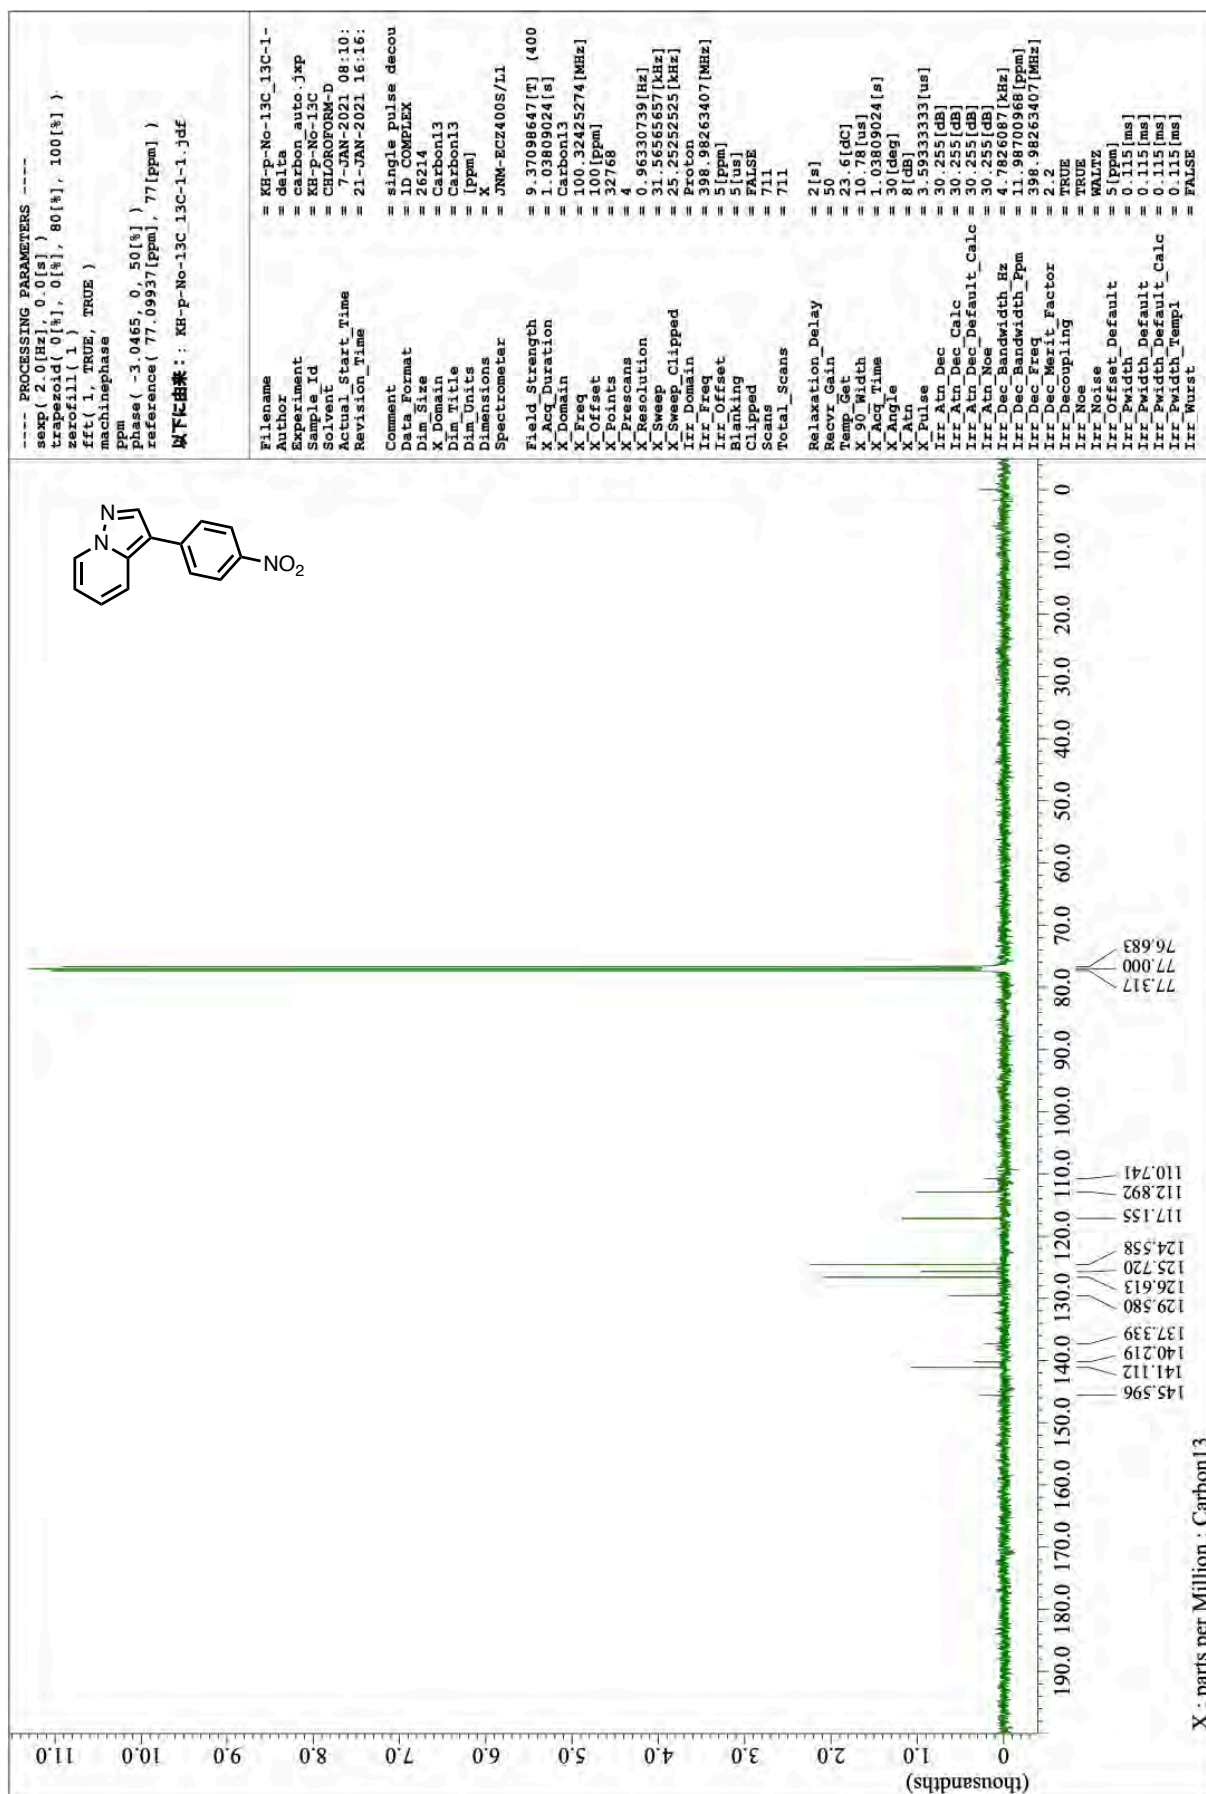

<sup>1</sup>H NMR of 1M (400 MHz, CDCl<sub>3</sub>)

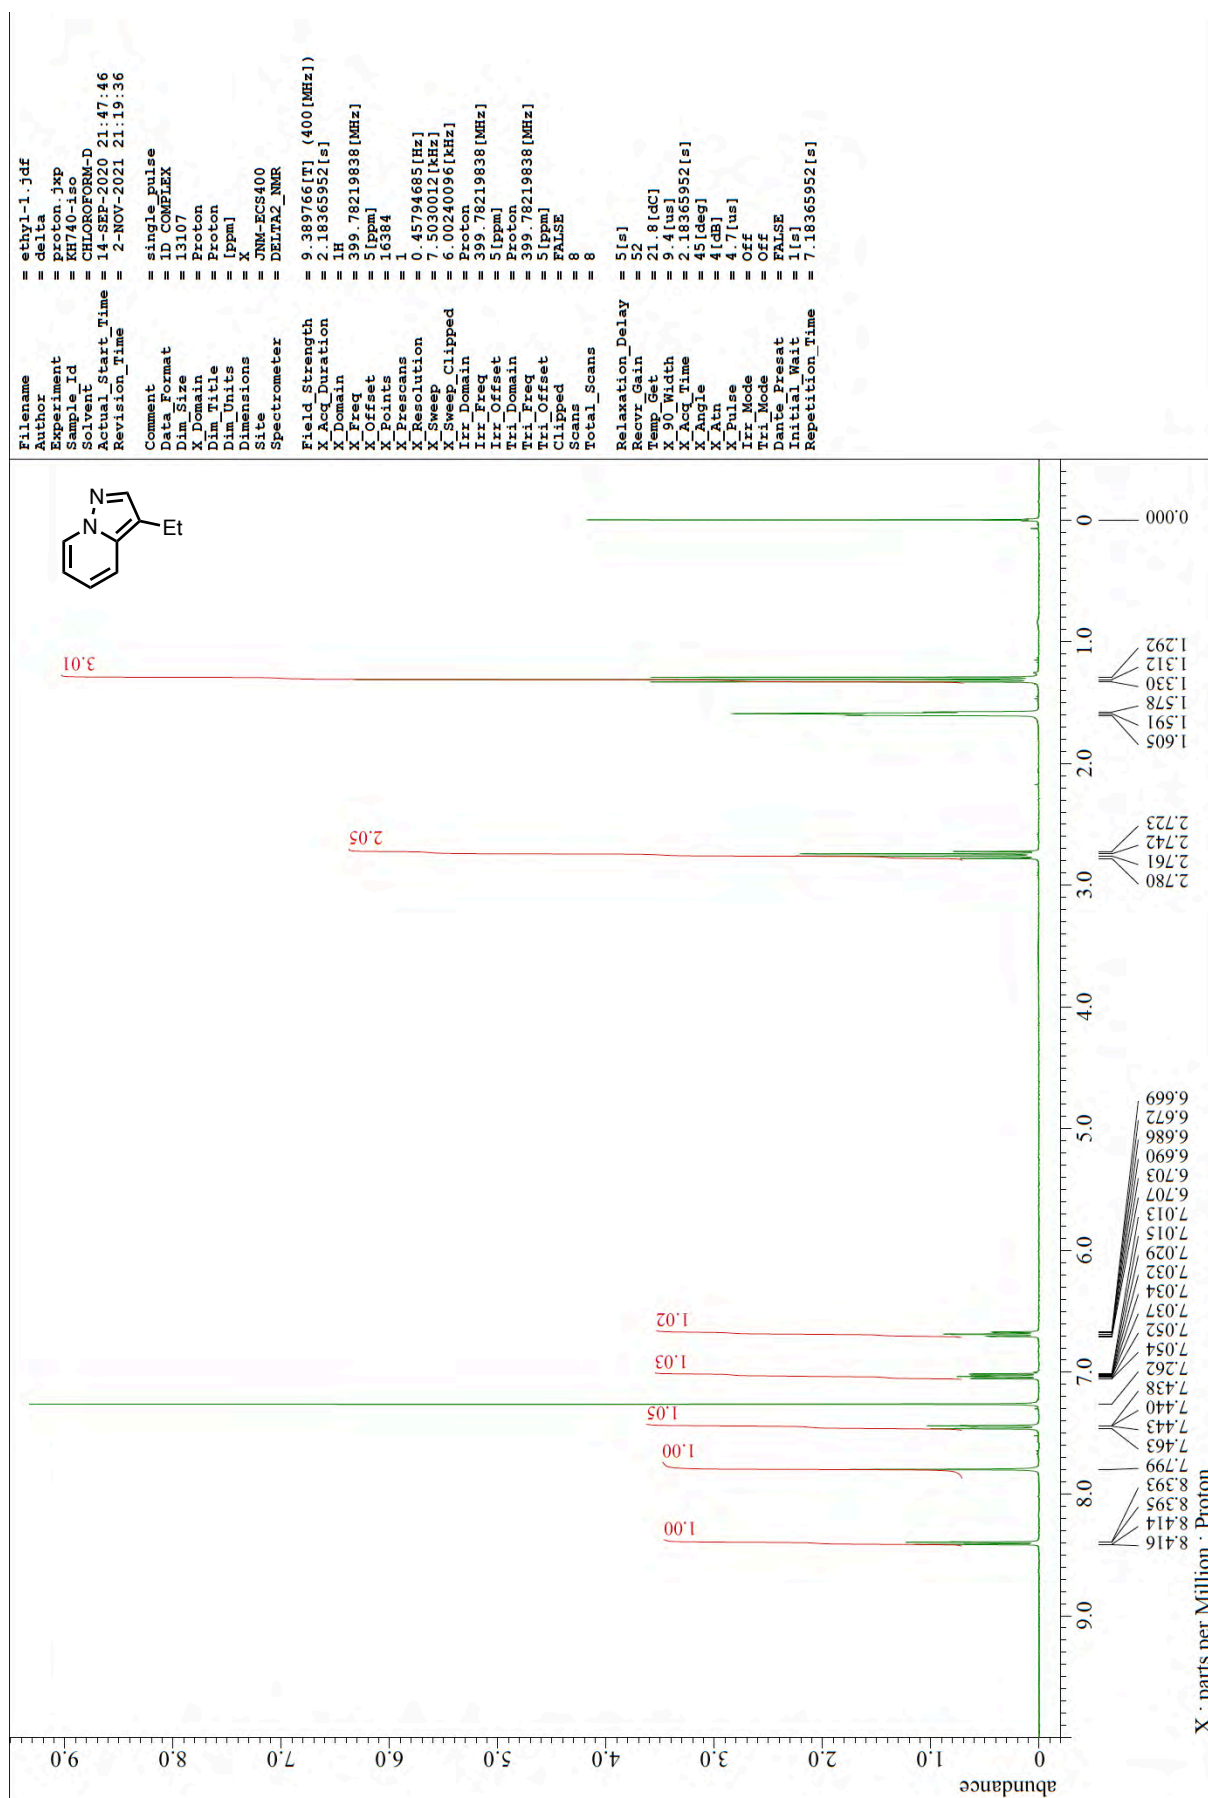

<sup>13</sup>C NMR of 1M (101 MHz, CDCl<sub>3</sub>)

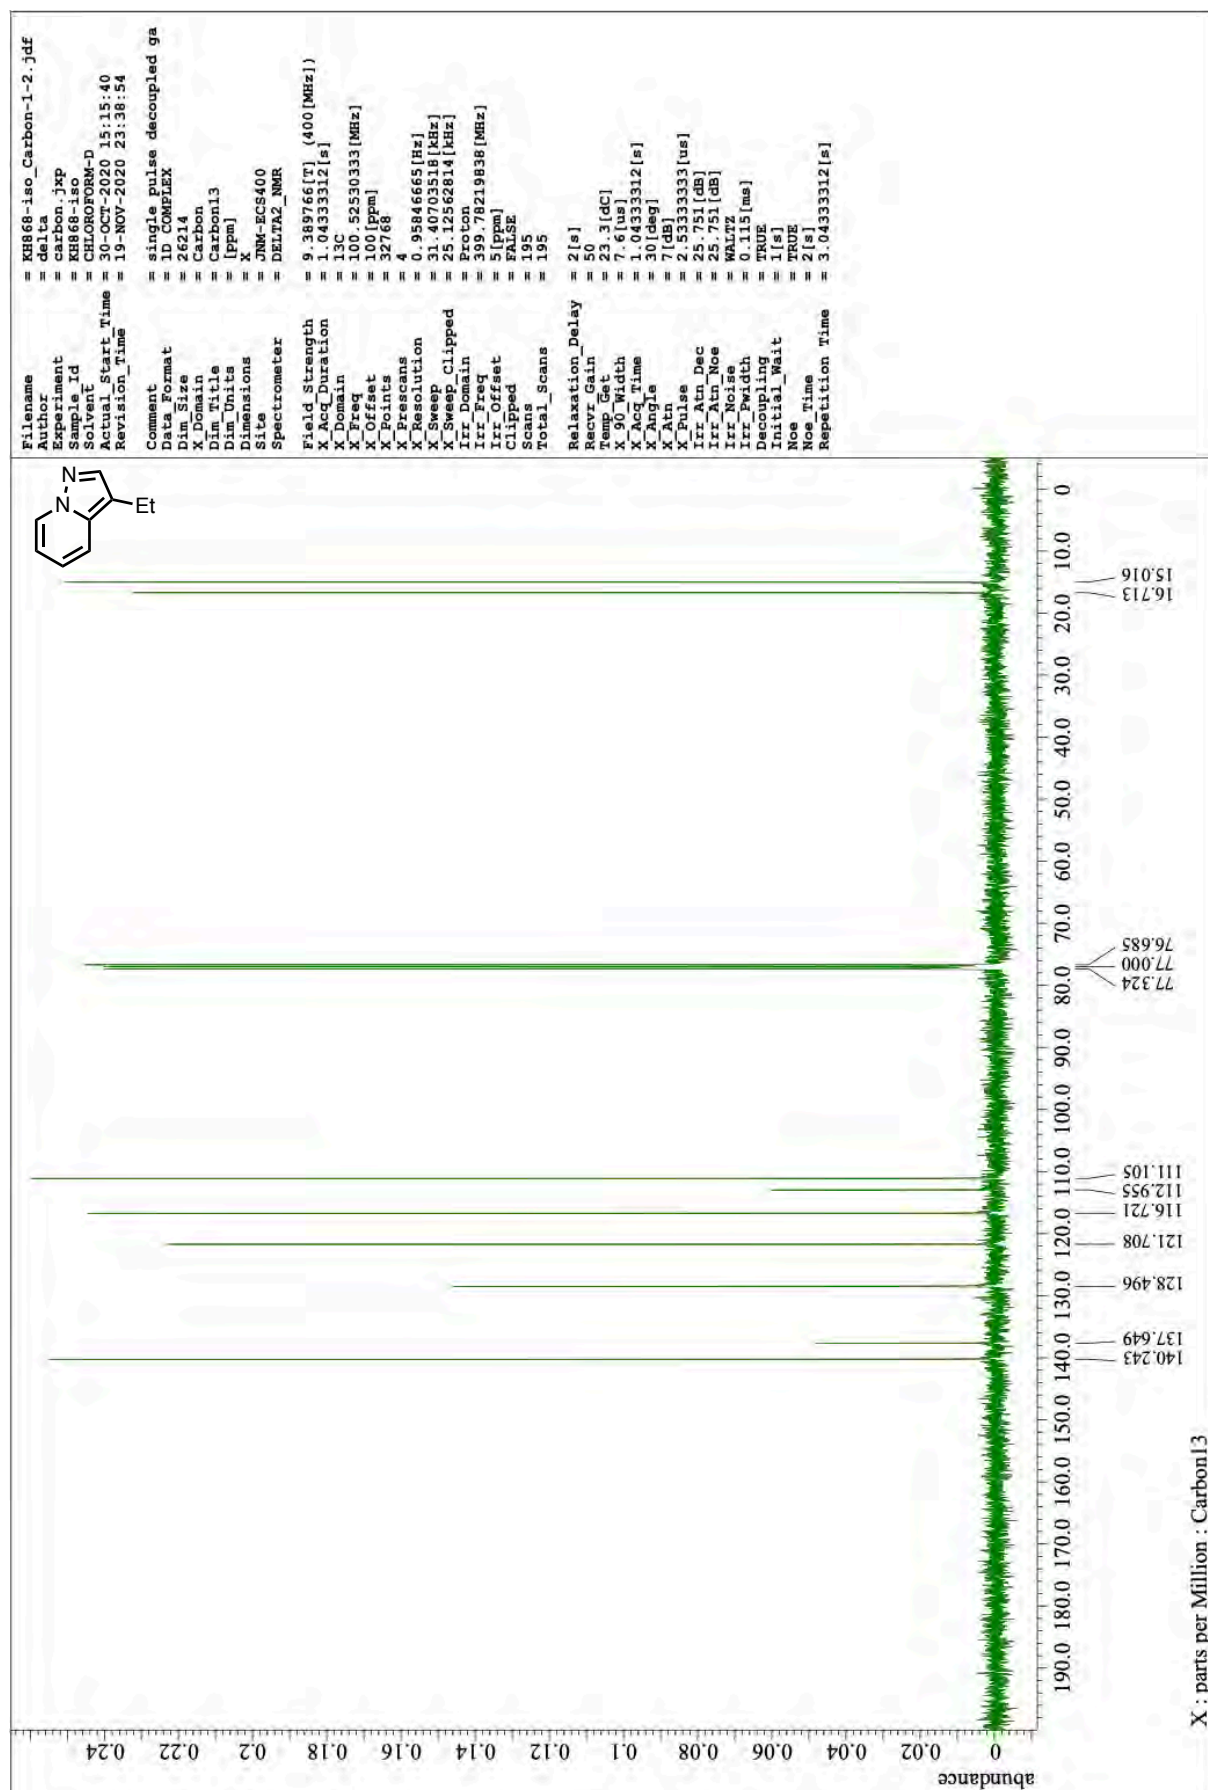

<sup>1</sup>H NMR of 1N (400 MHz, CDCl<sub>3</sub>)

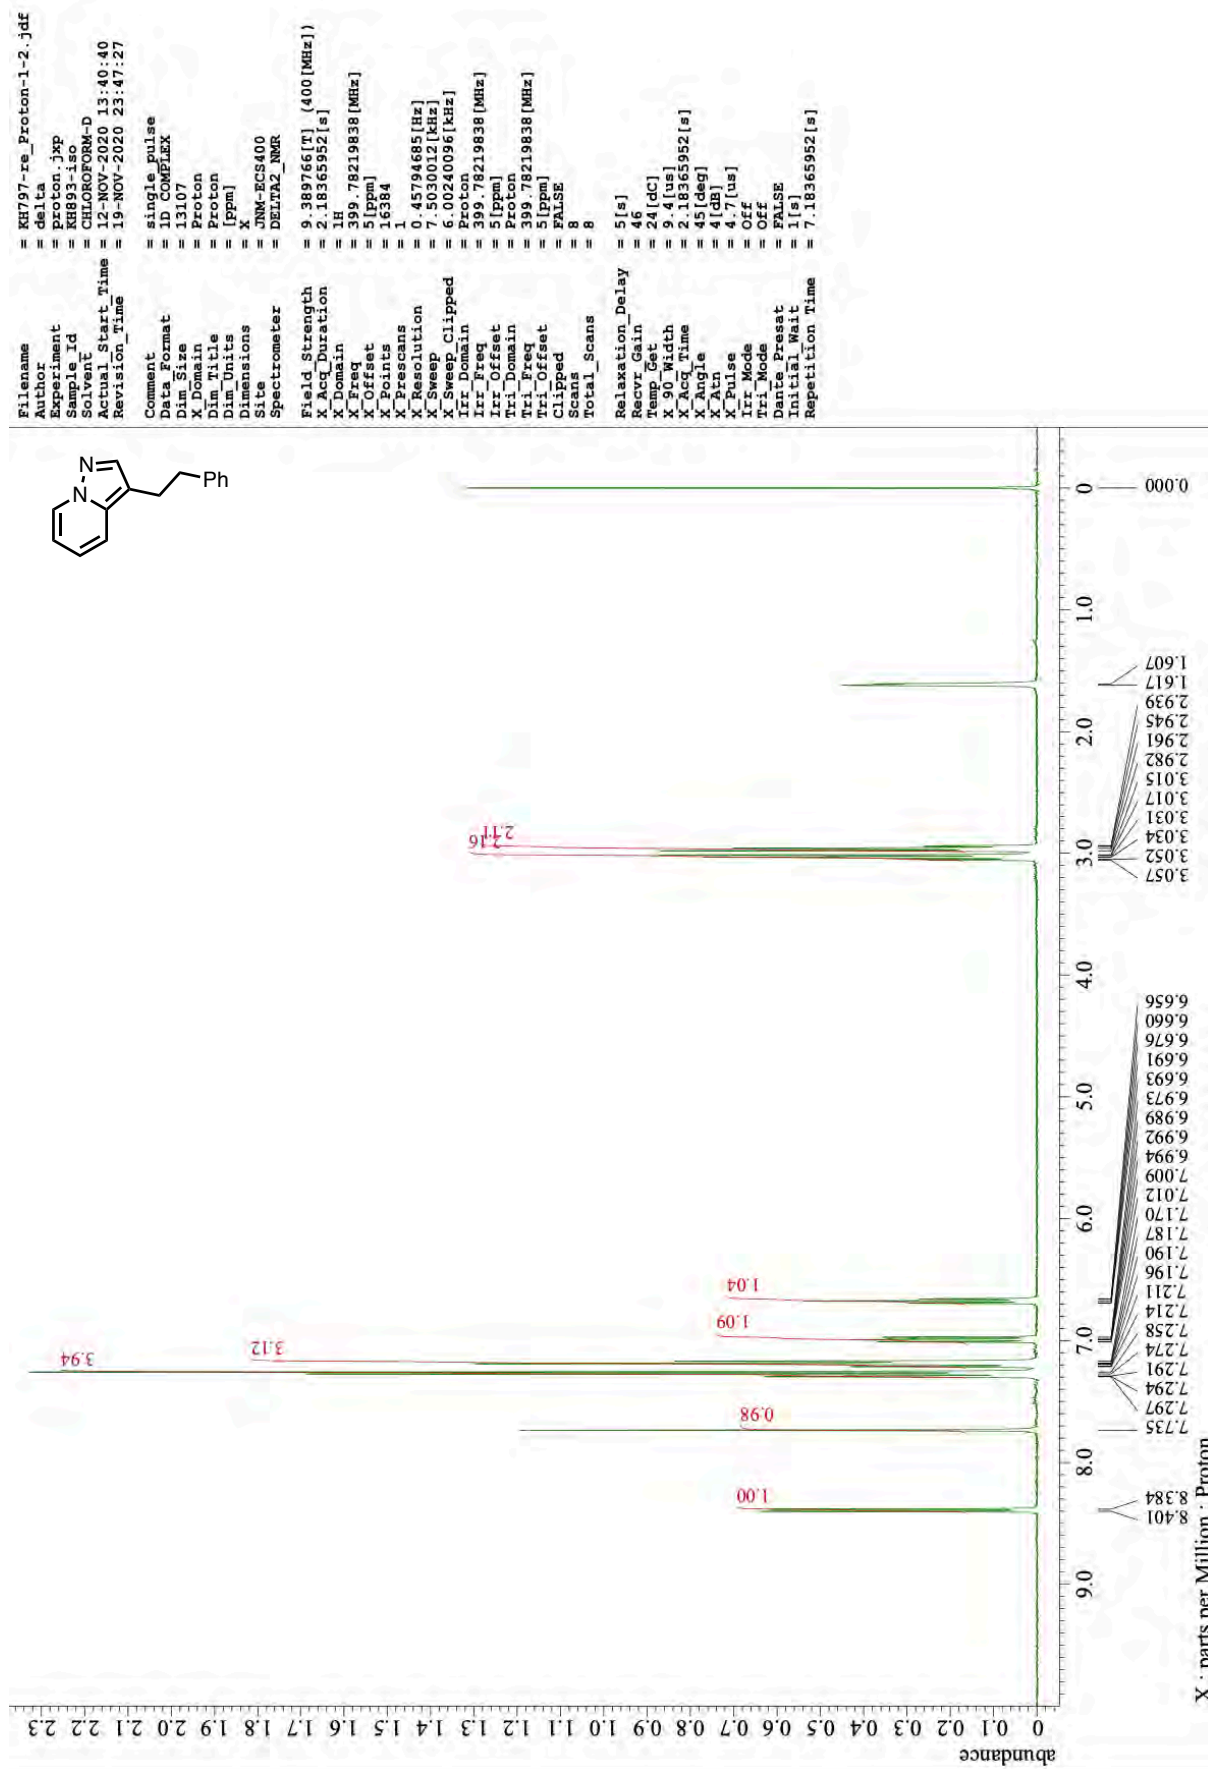

<sup>13</sup>C NMR of 1N (101 MHz, CDCl<sub>3</sub>)

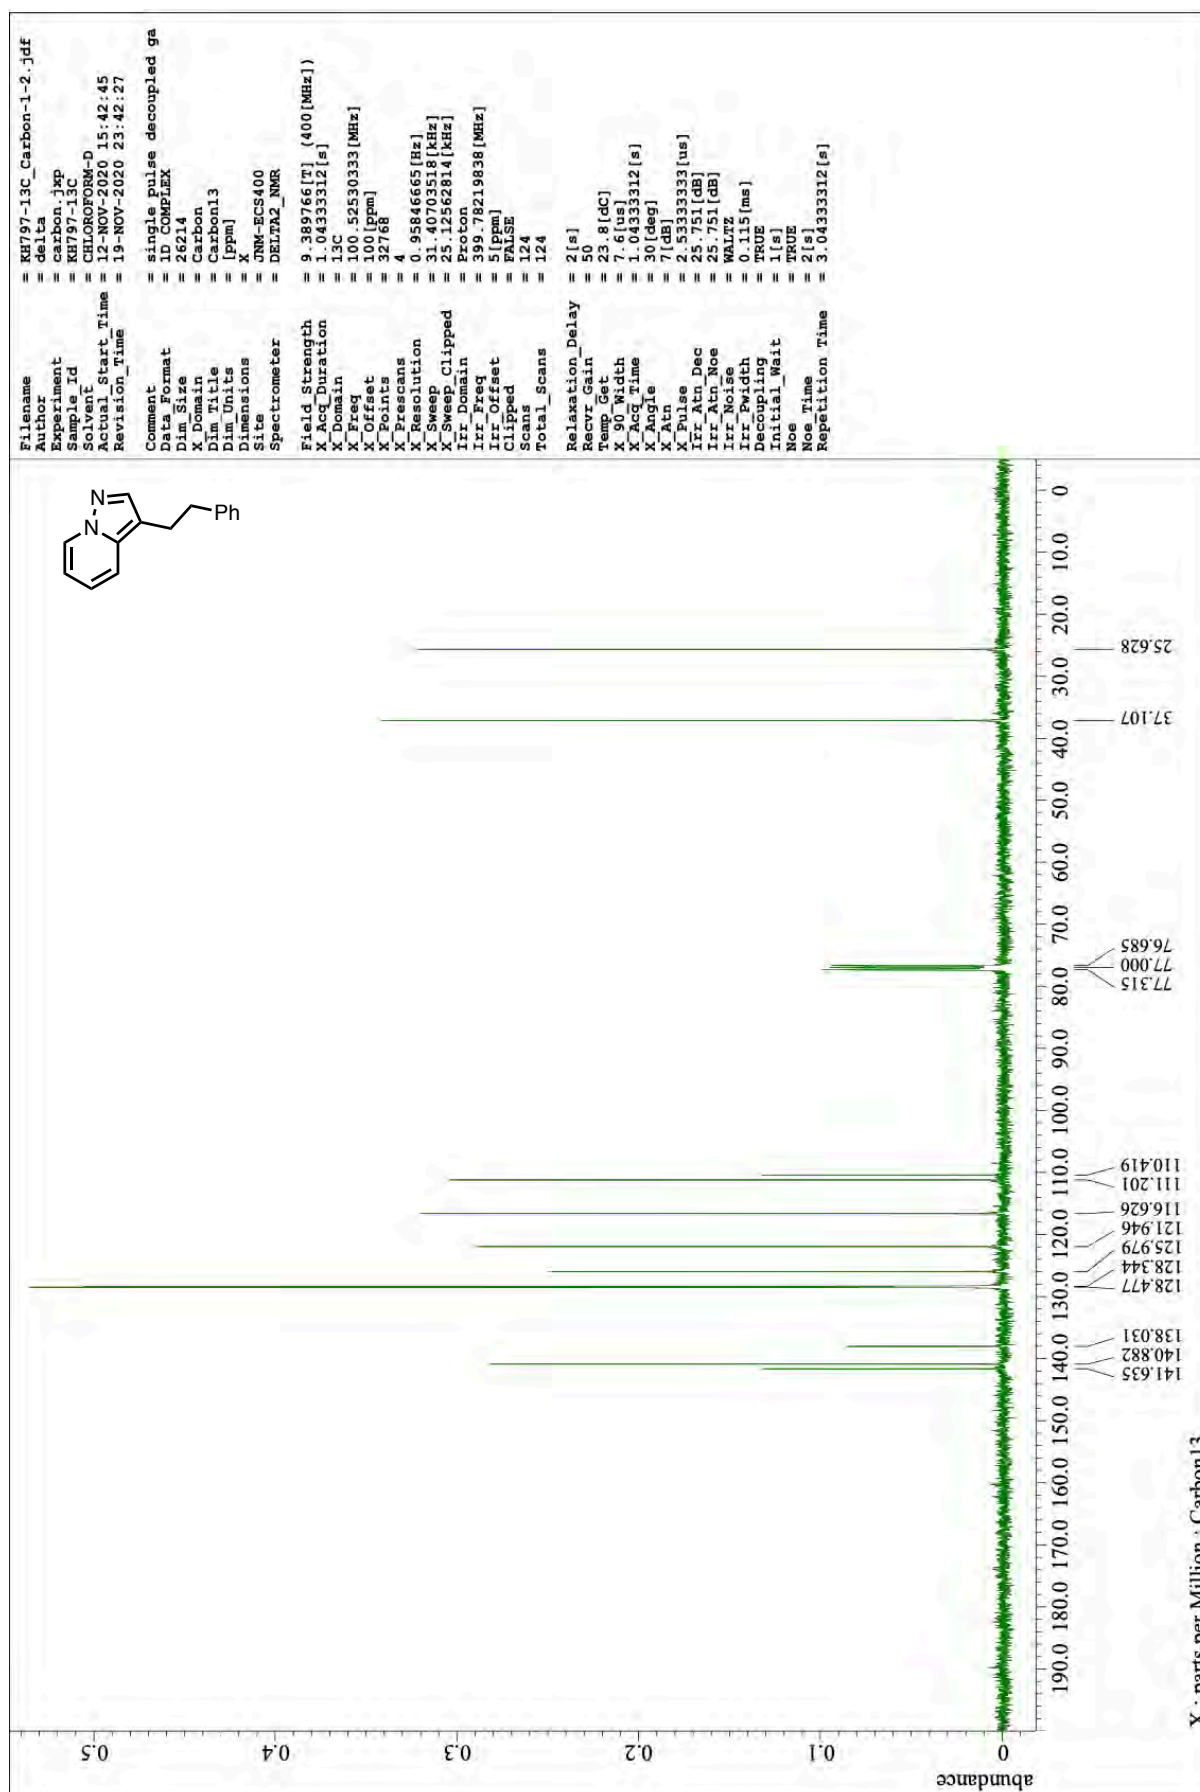



<sup>1</sup>H NMR of **10** (400 MHz, CDCl<sub>3</sub>)

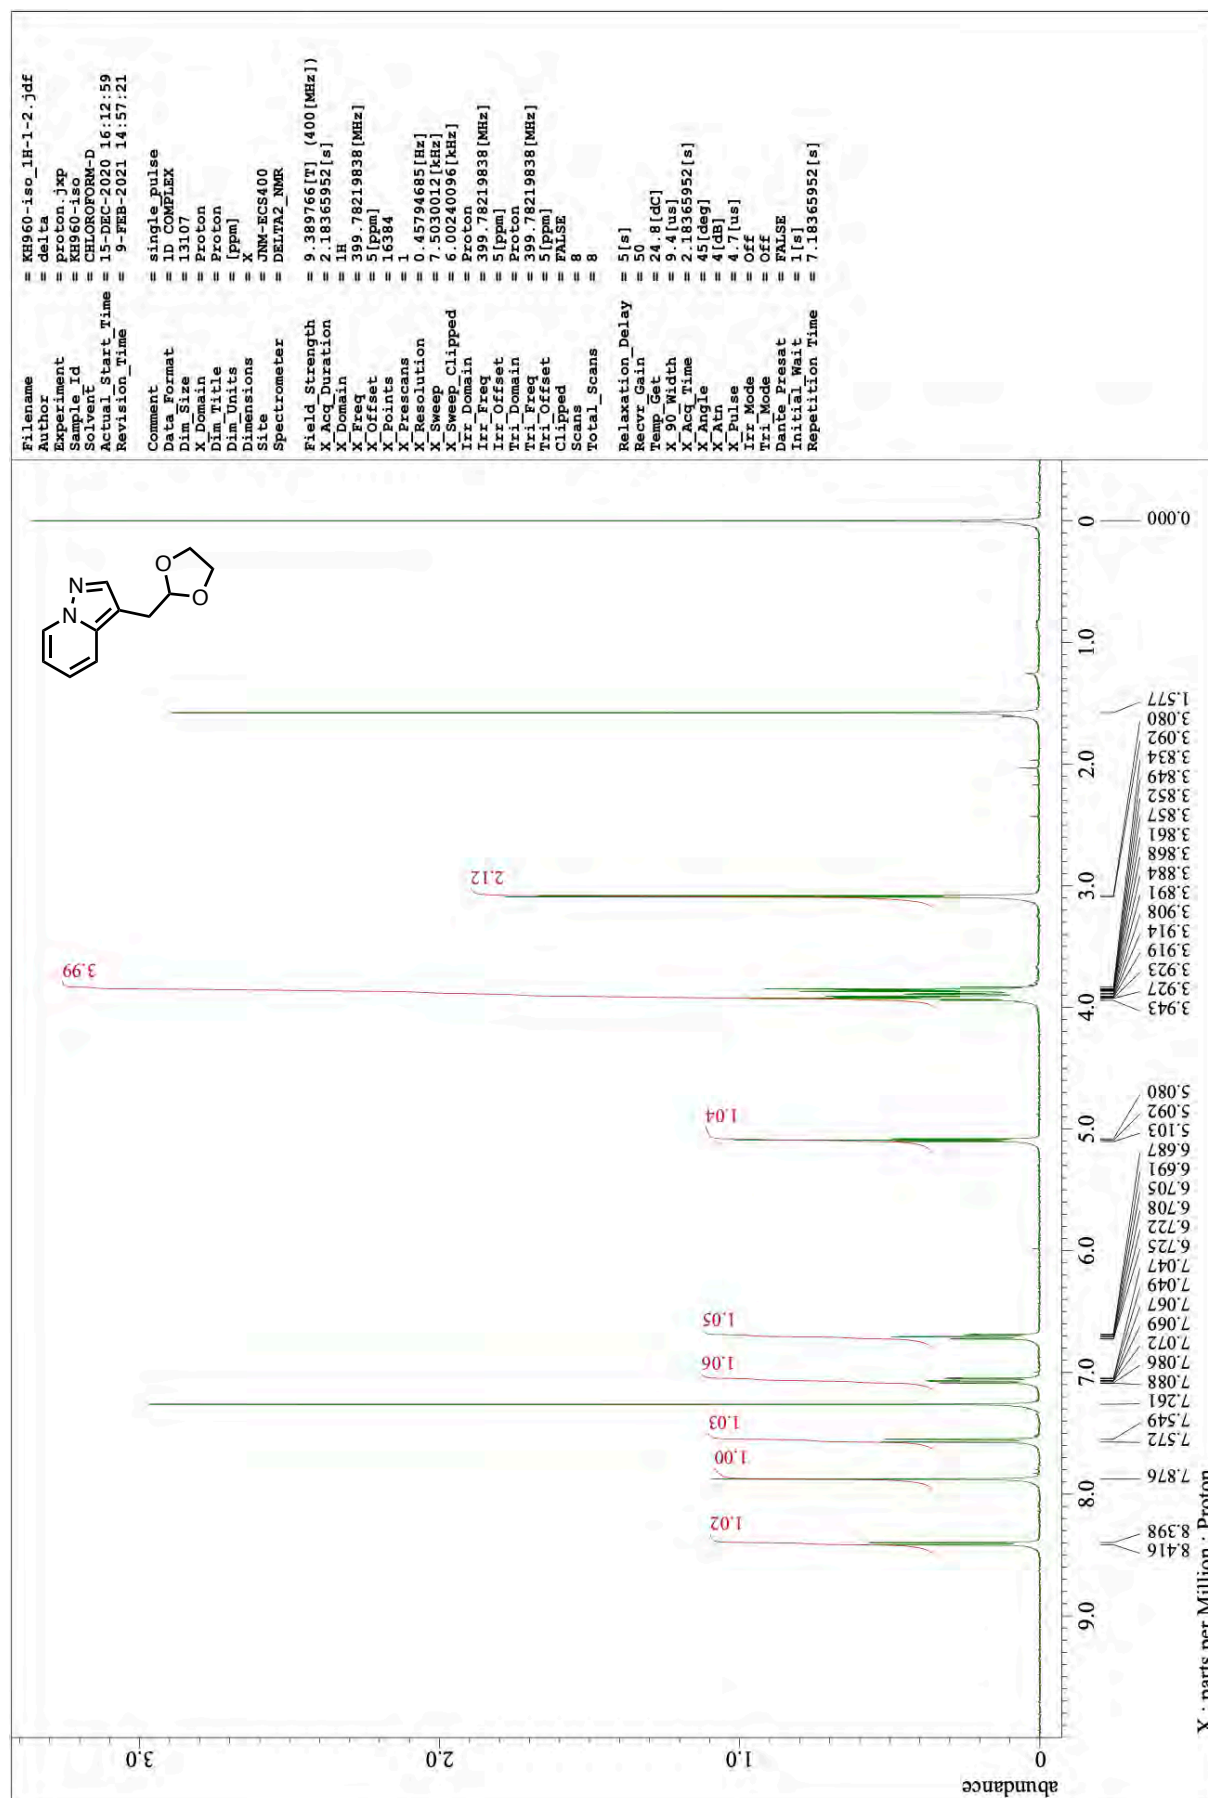

<sup>13</sup>C NMR of **10** (101 MHz, CDCl<sub>3</sub>)

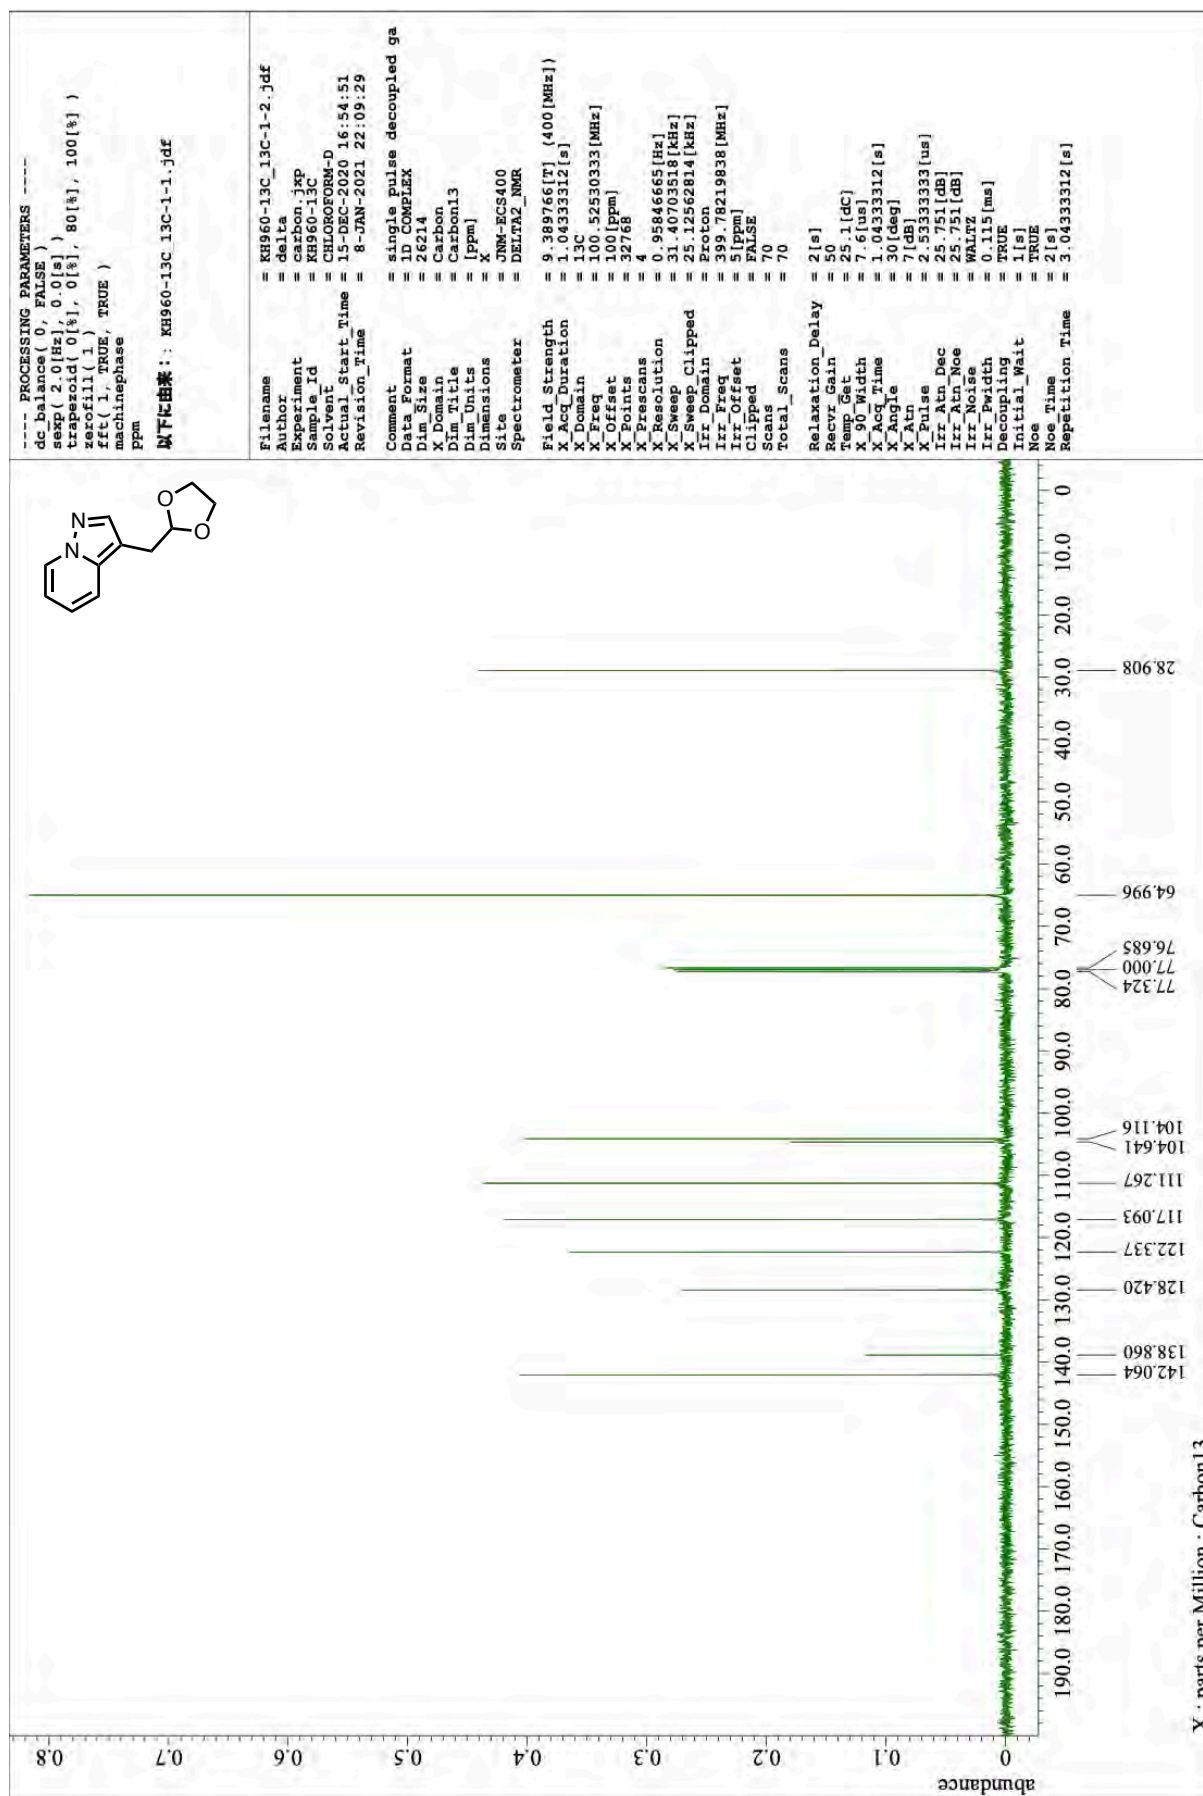

<sup>1</sup>H NMR of 1P (400 MHz, CDCl<sub>3</sub>)

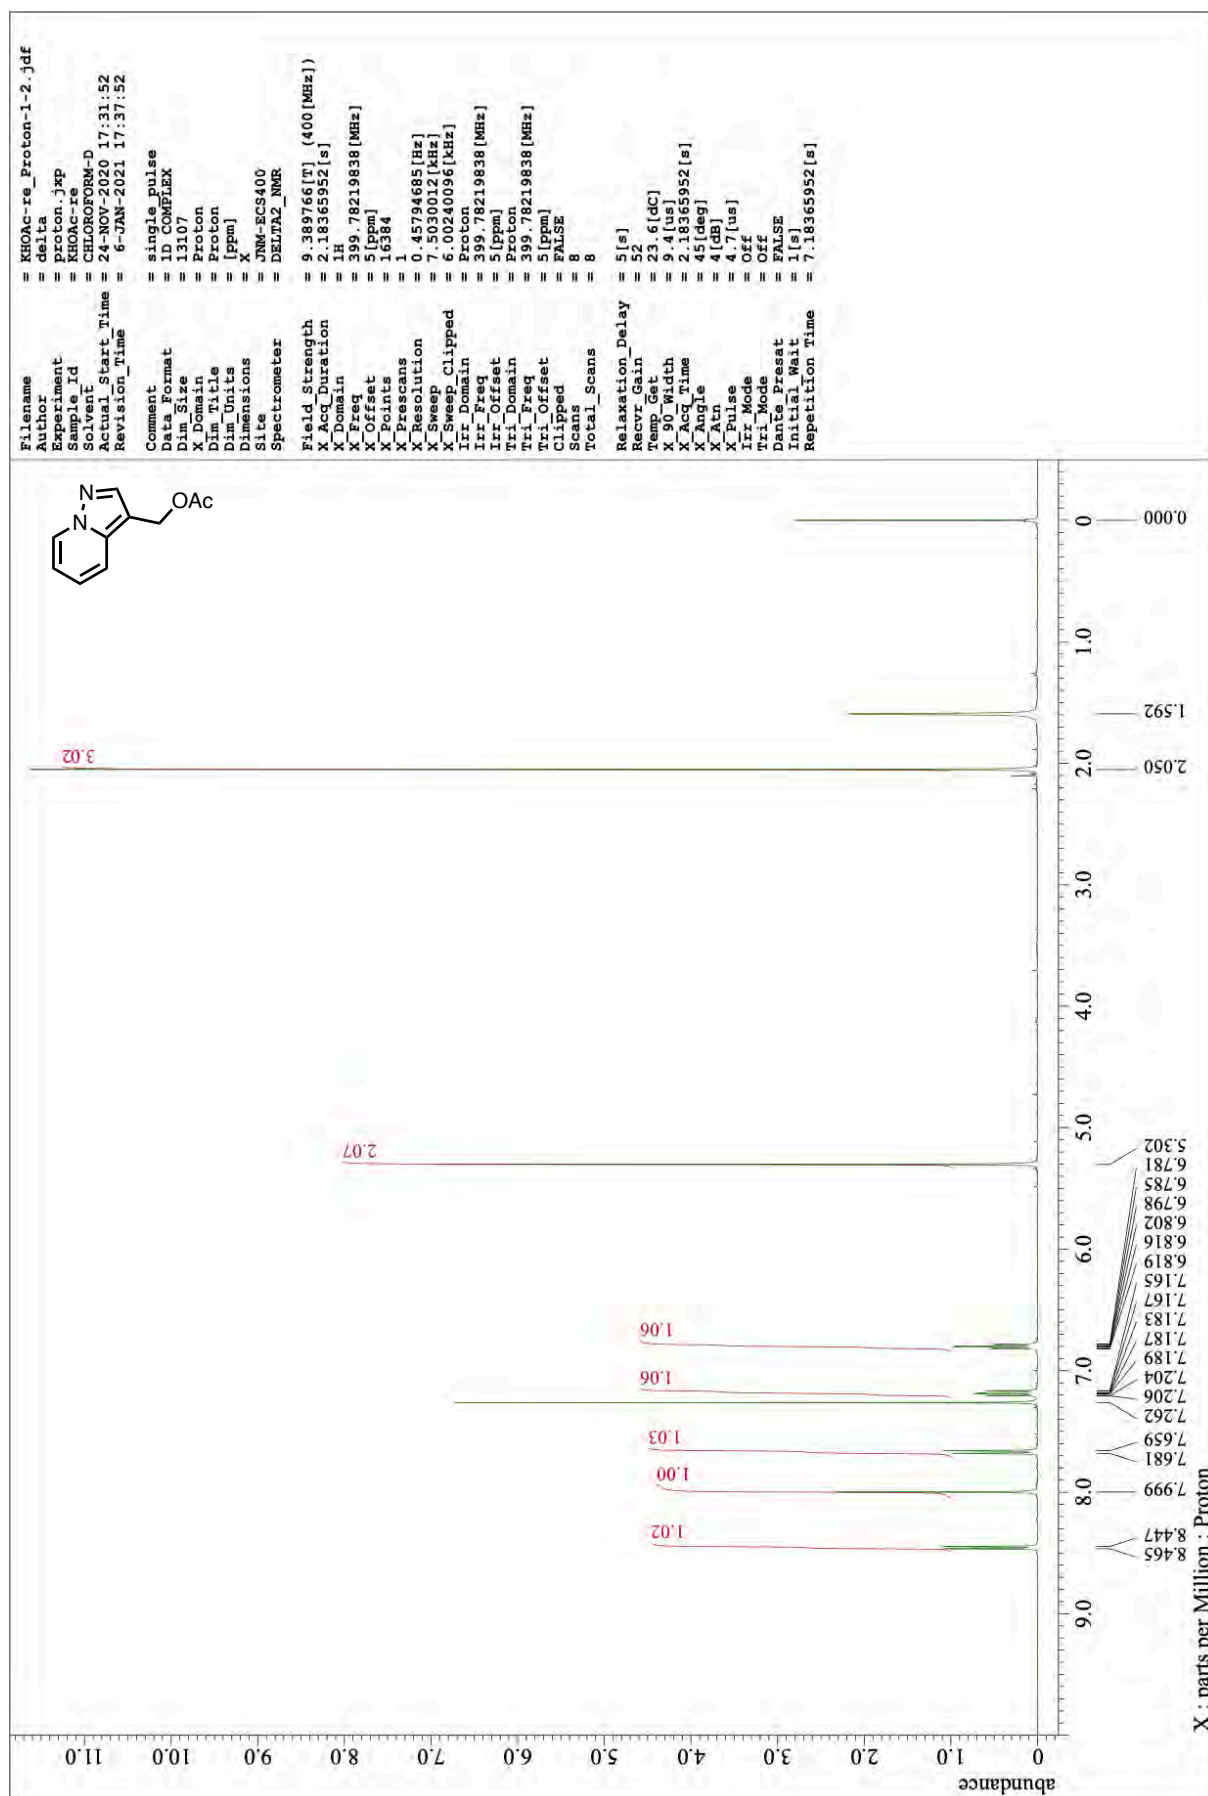

<sup>13</sup>C NMR of **1P** (101 MHz, CDCl<sub>3</sub>)

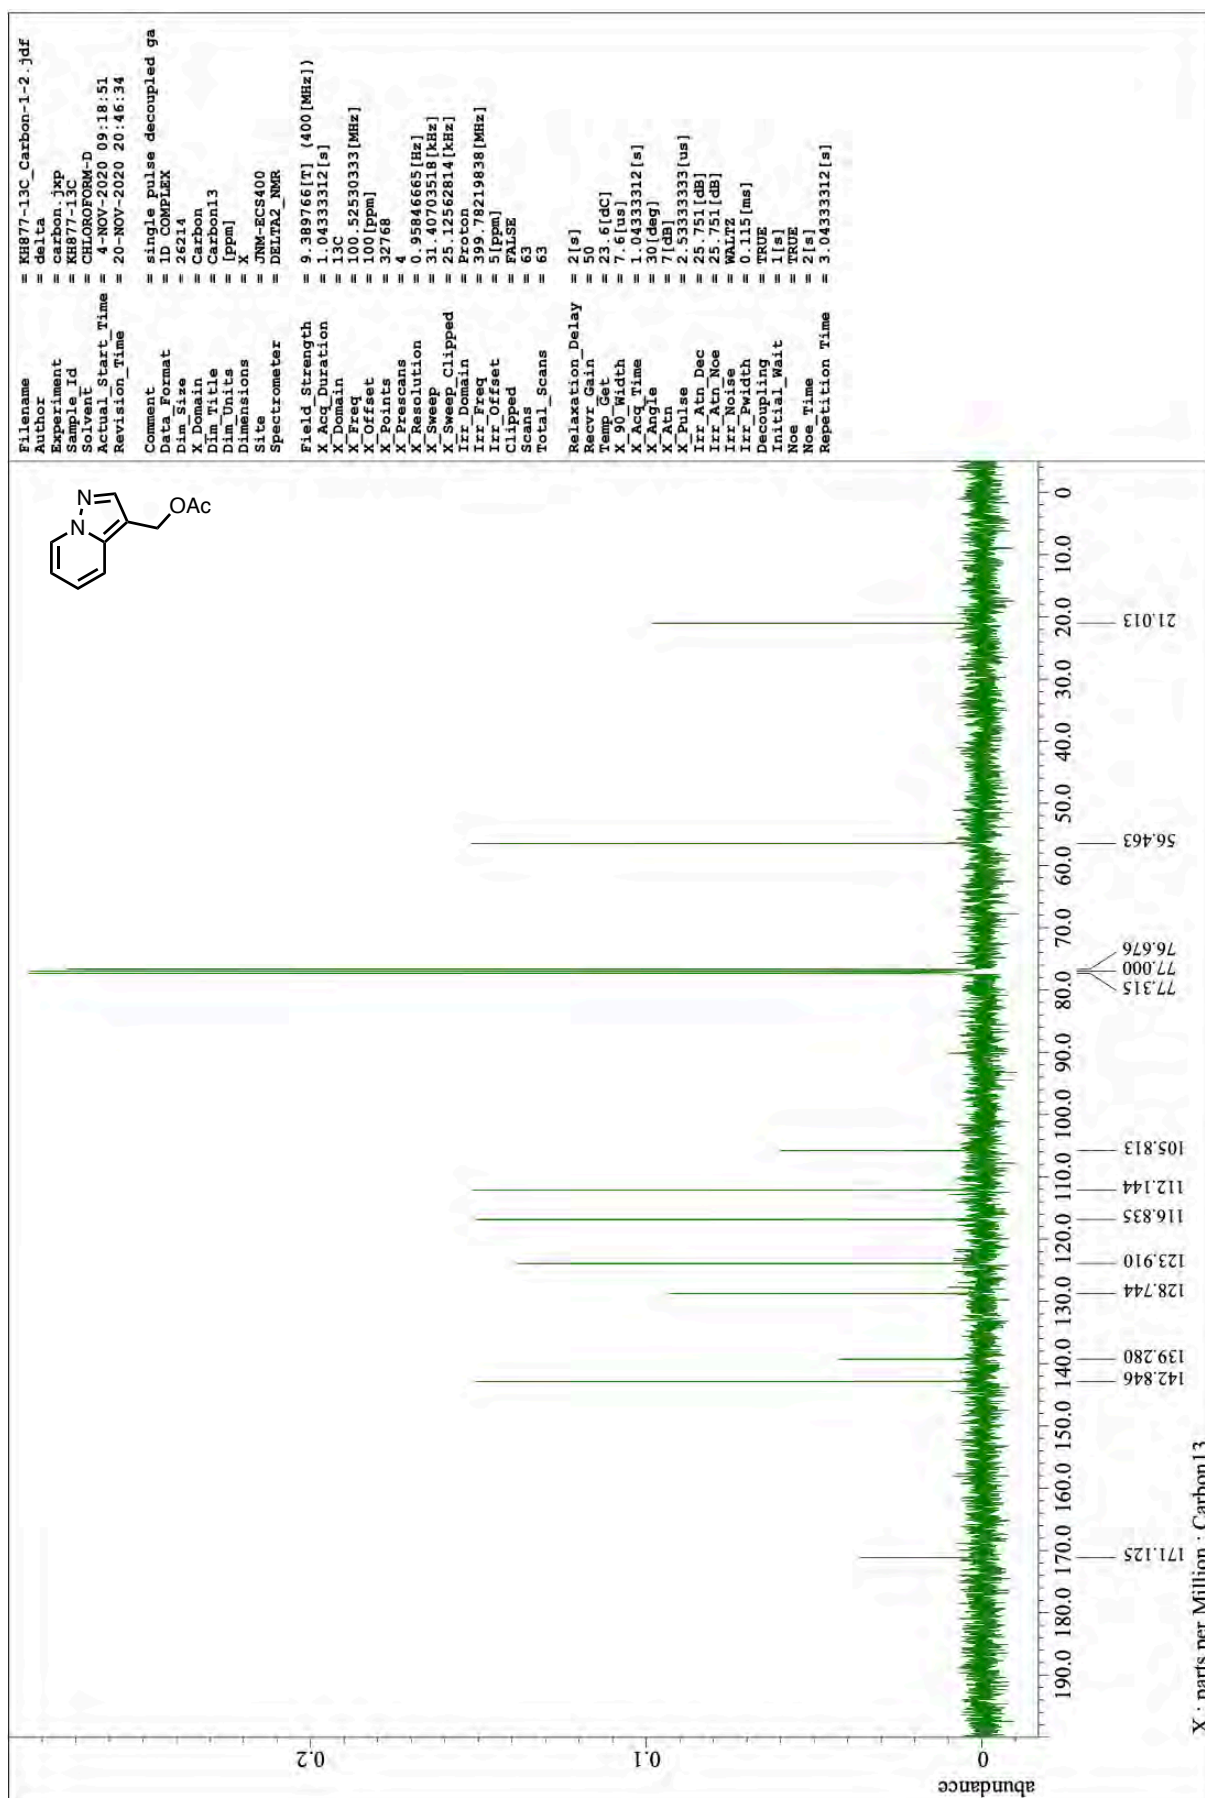

<sup>1</sup>H NMR of 1R (400 MHz, CDCl<sub>3</sub>)

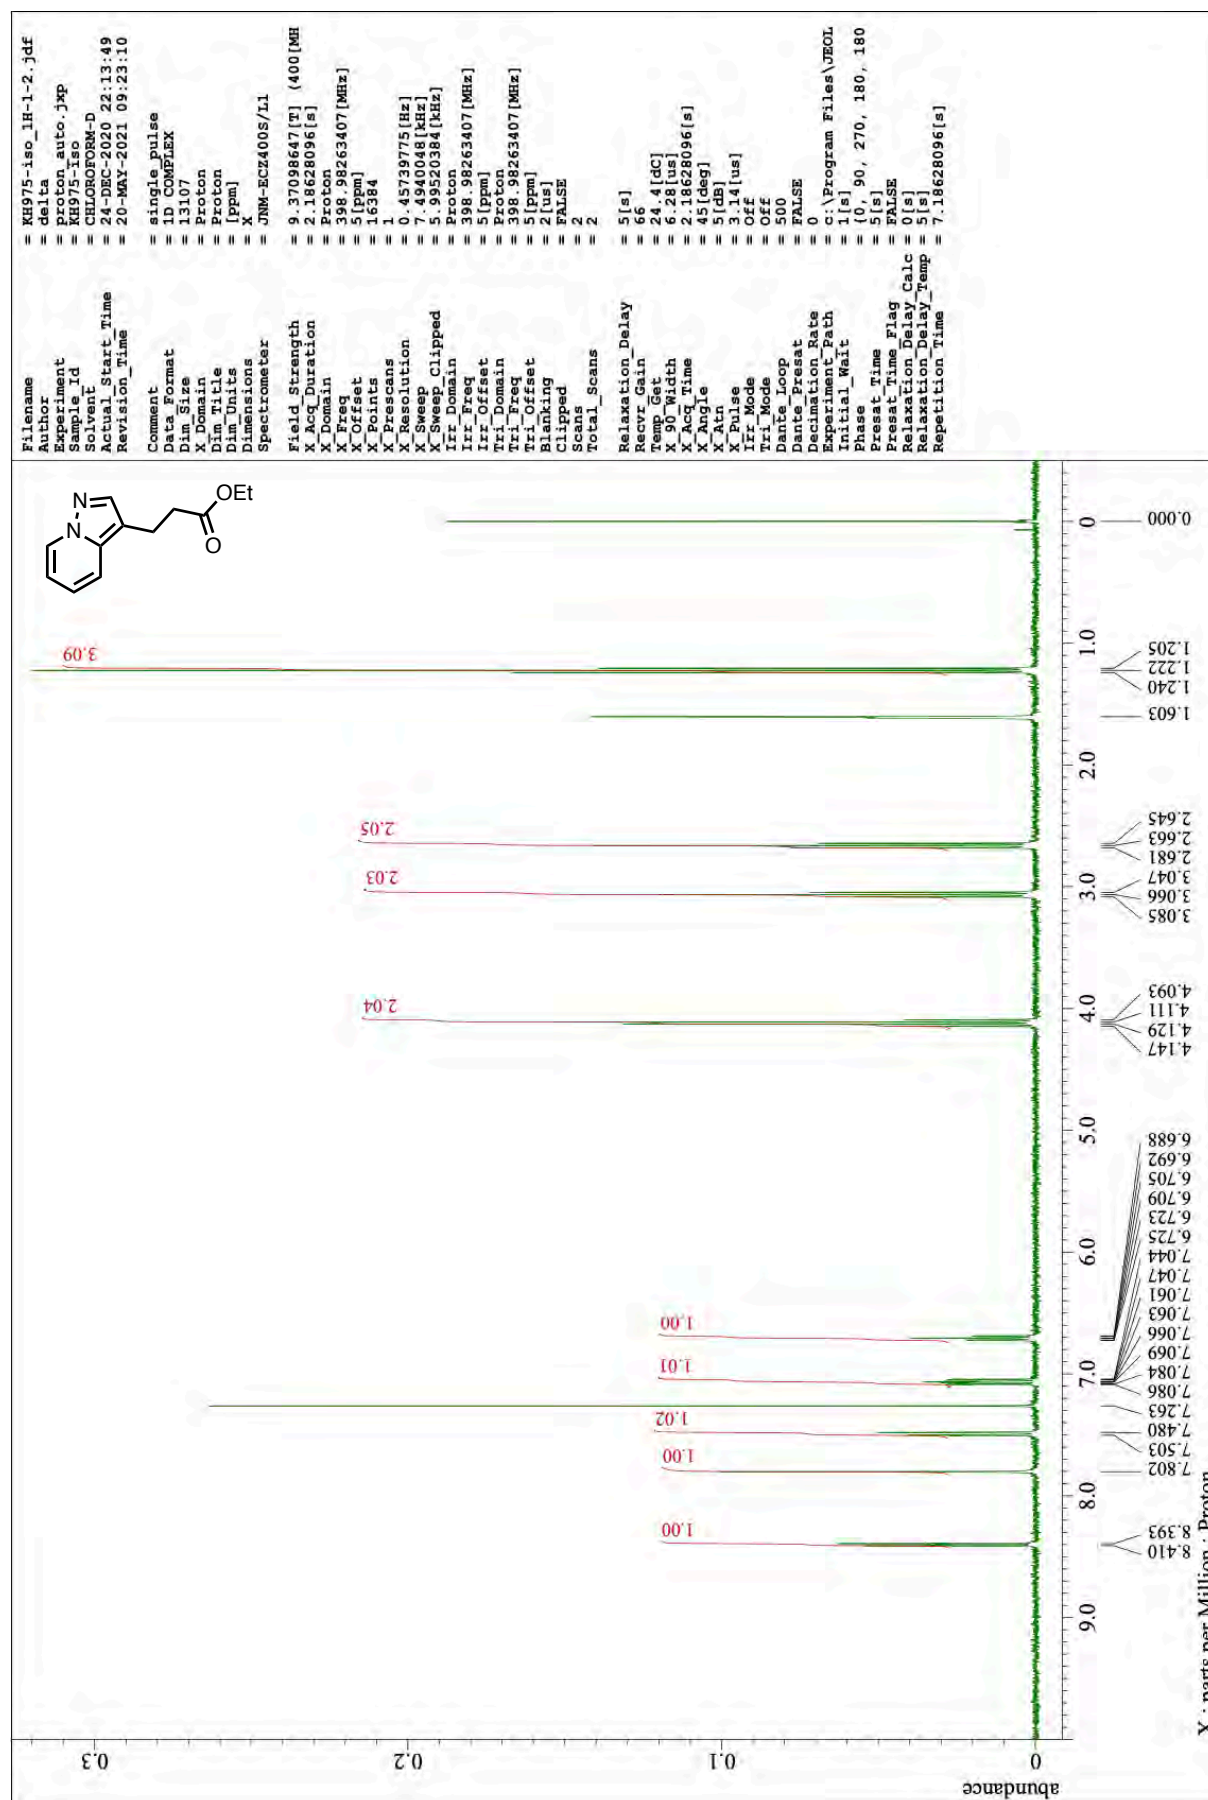

<sup>13</sup>C NMR of **1R** (101 MHz, CDCl<sub>3</sub>)

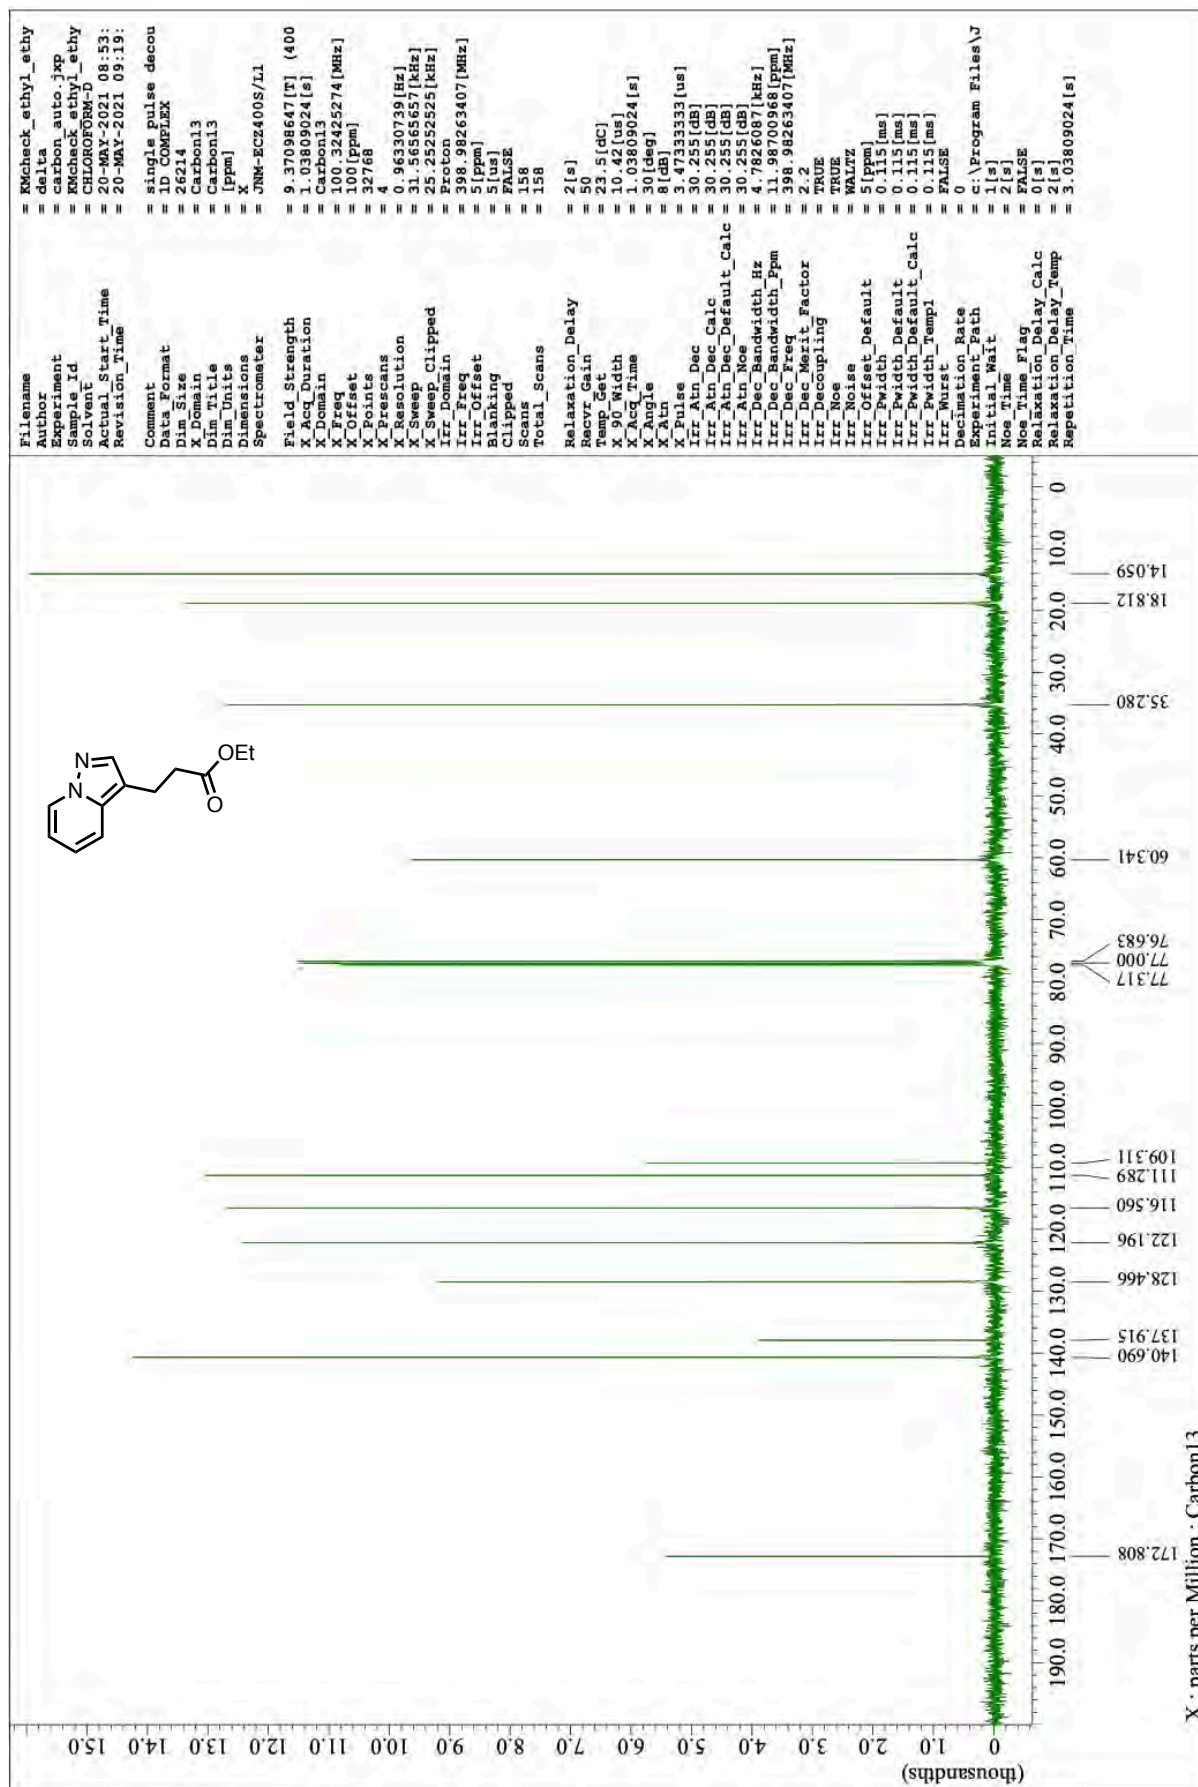

<sup>1</sup>H NMR of 1T (400 MHz, CDCl<sub>3</sub>)

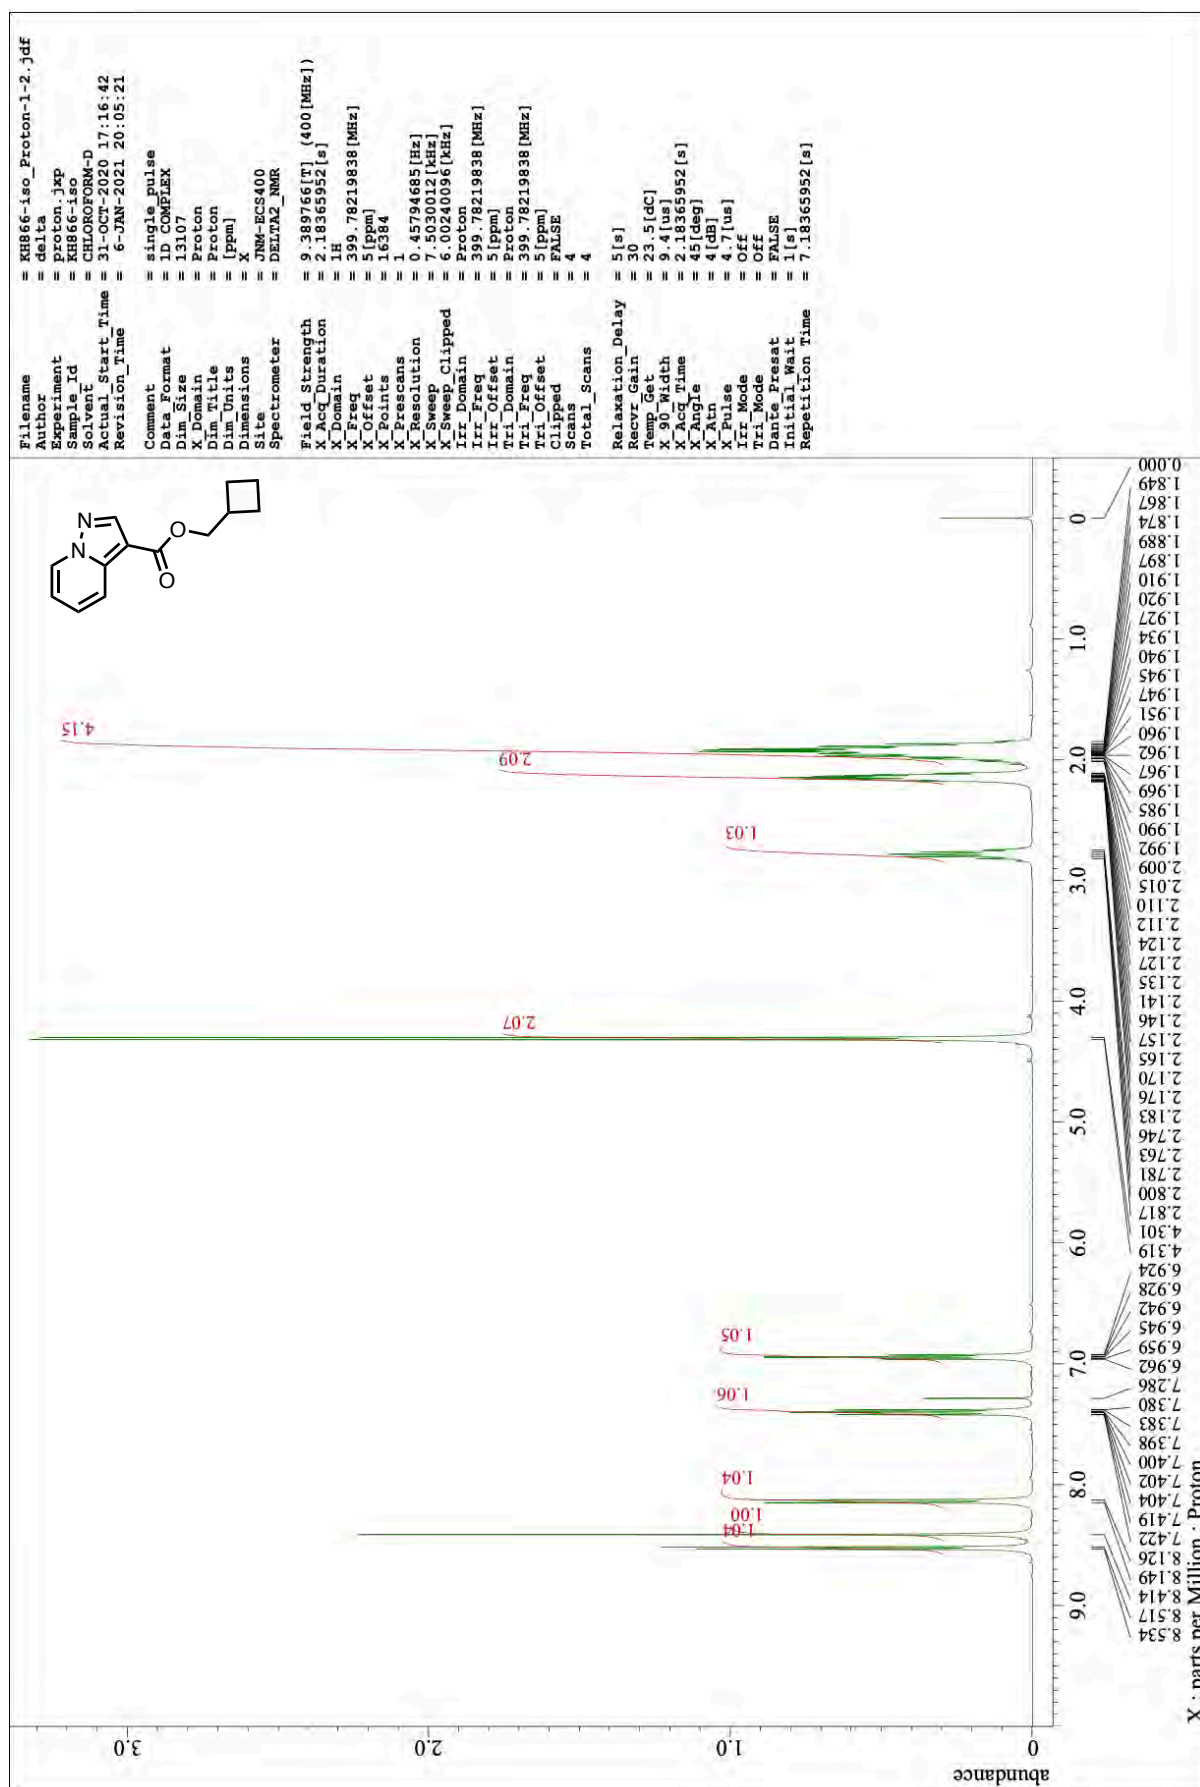

<sup>13</sup>C NMR of 1T (101 MHz, CDCl<sub>3</sub>)

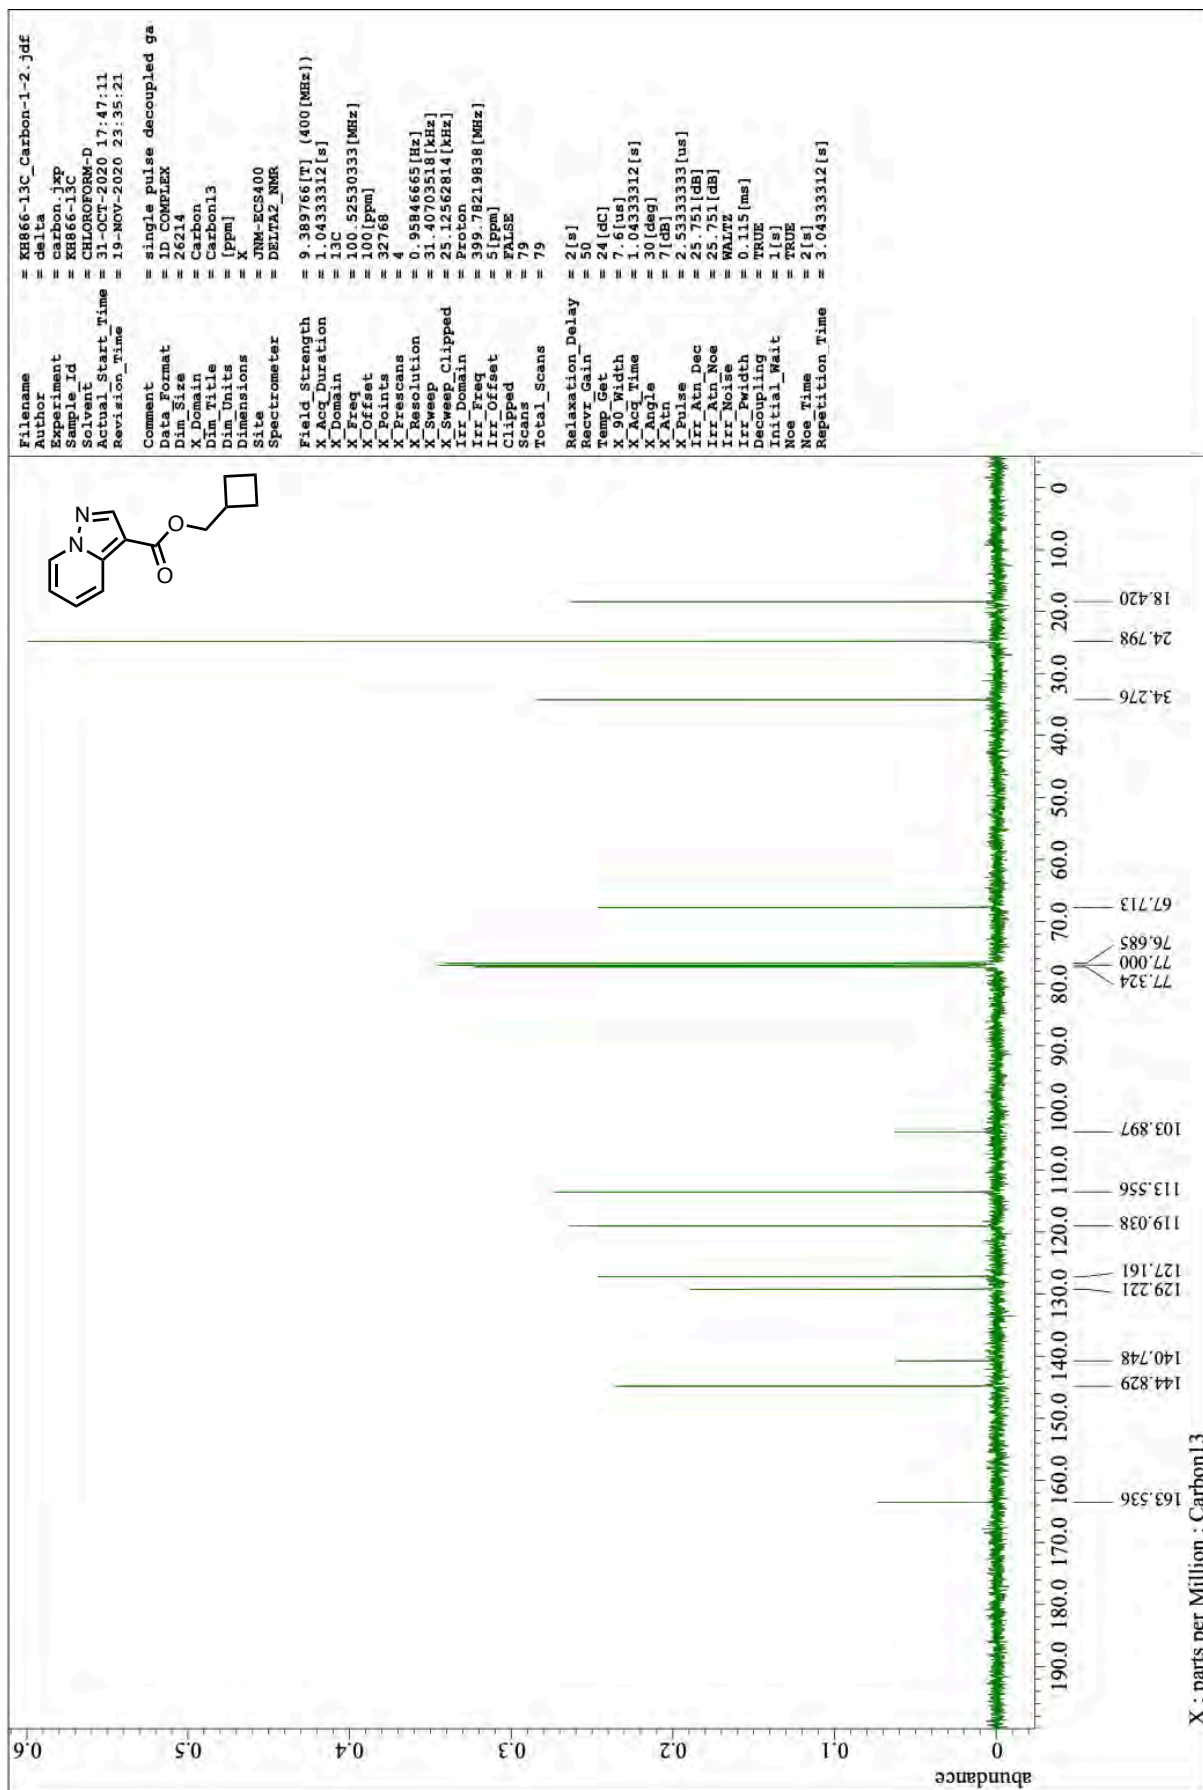



<sup>1</sup>H NMR of 1U (400 MHz, CDCl<sub>3</sub>)

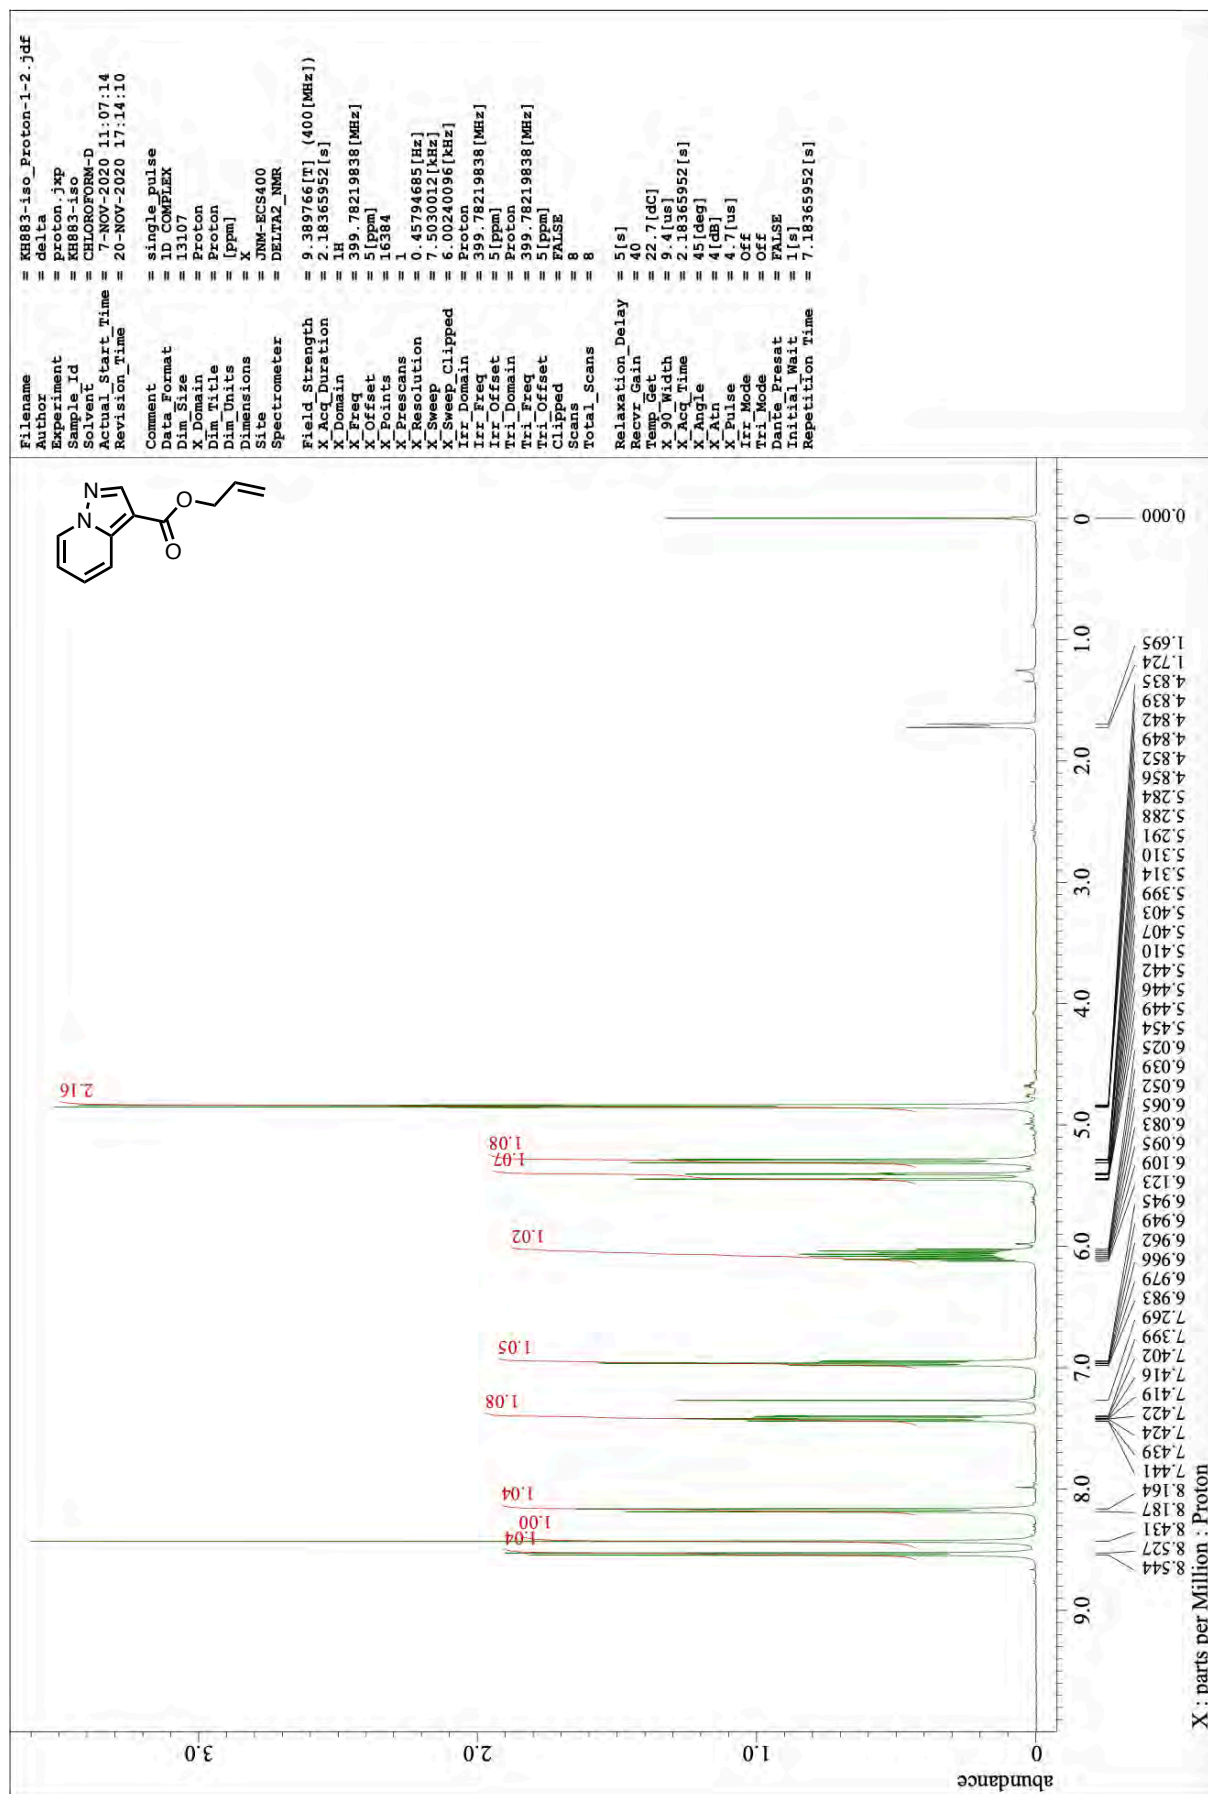

<sup>13</sup>C NMR of 1U (101 MHz, CDCl<sub>3</sub>)

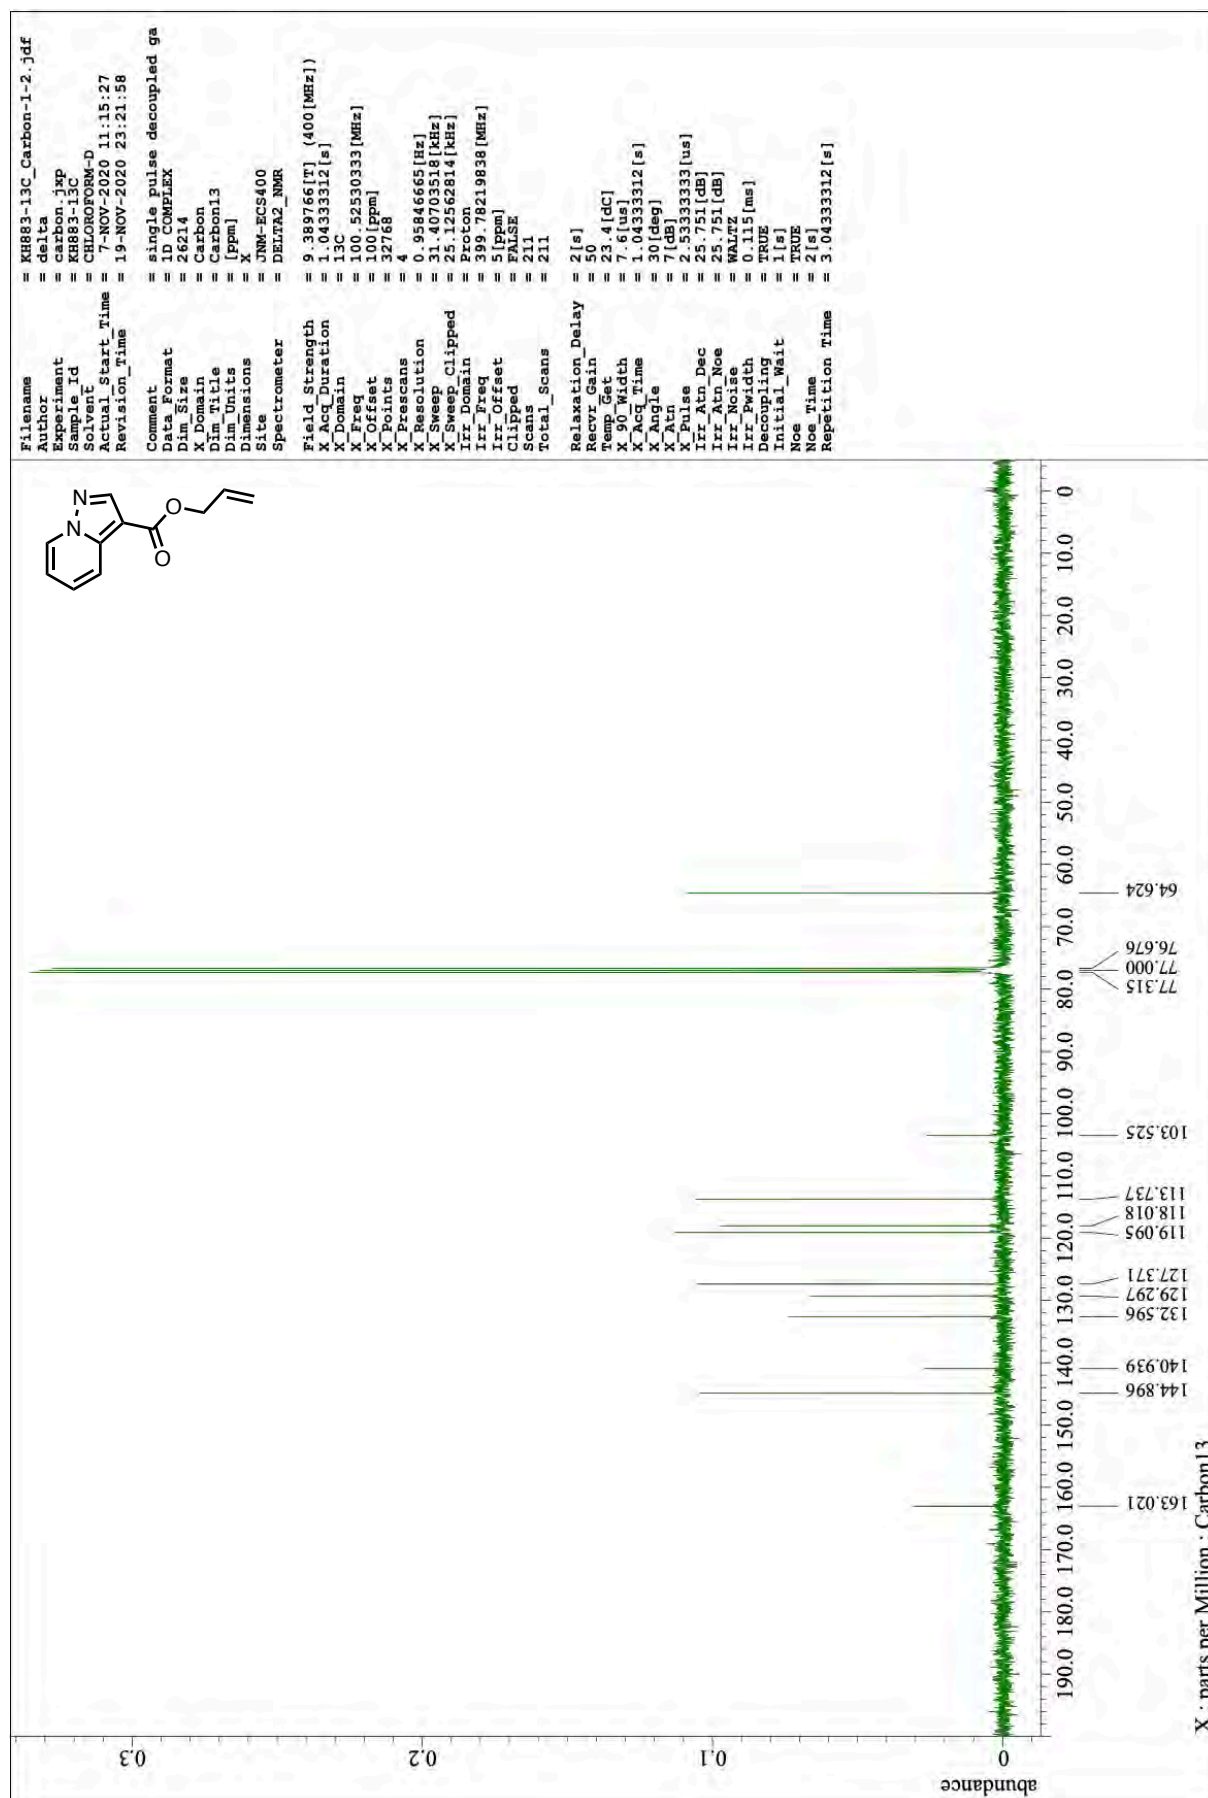

<sup>1</sup>H NMR of 1V (400 MHz, CDCl<sub>3</sub>)

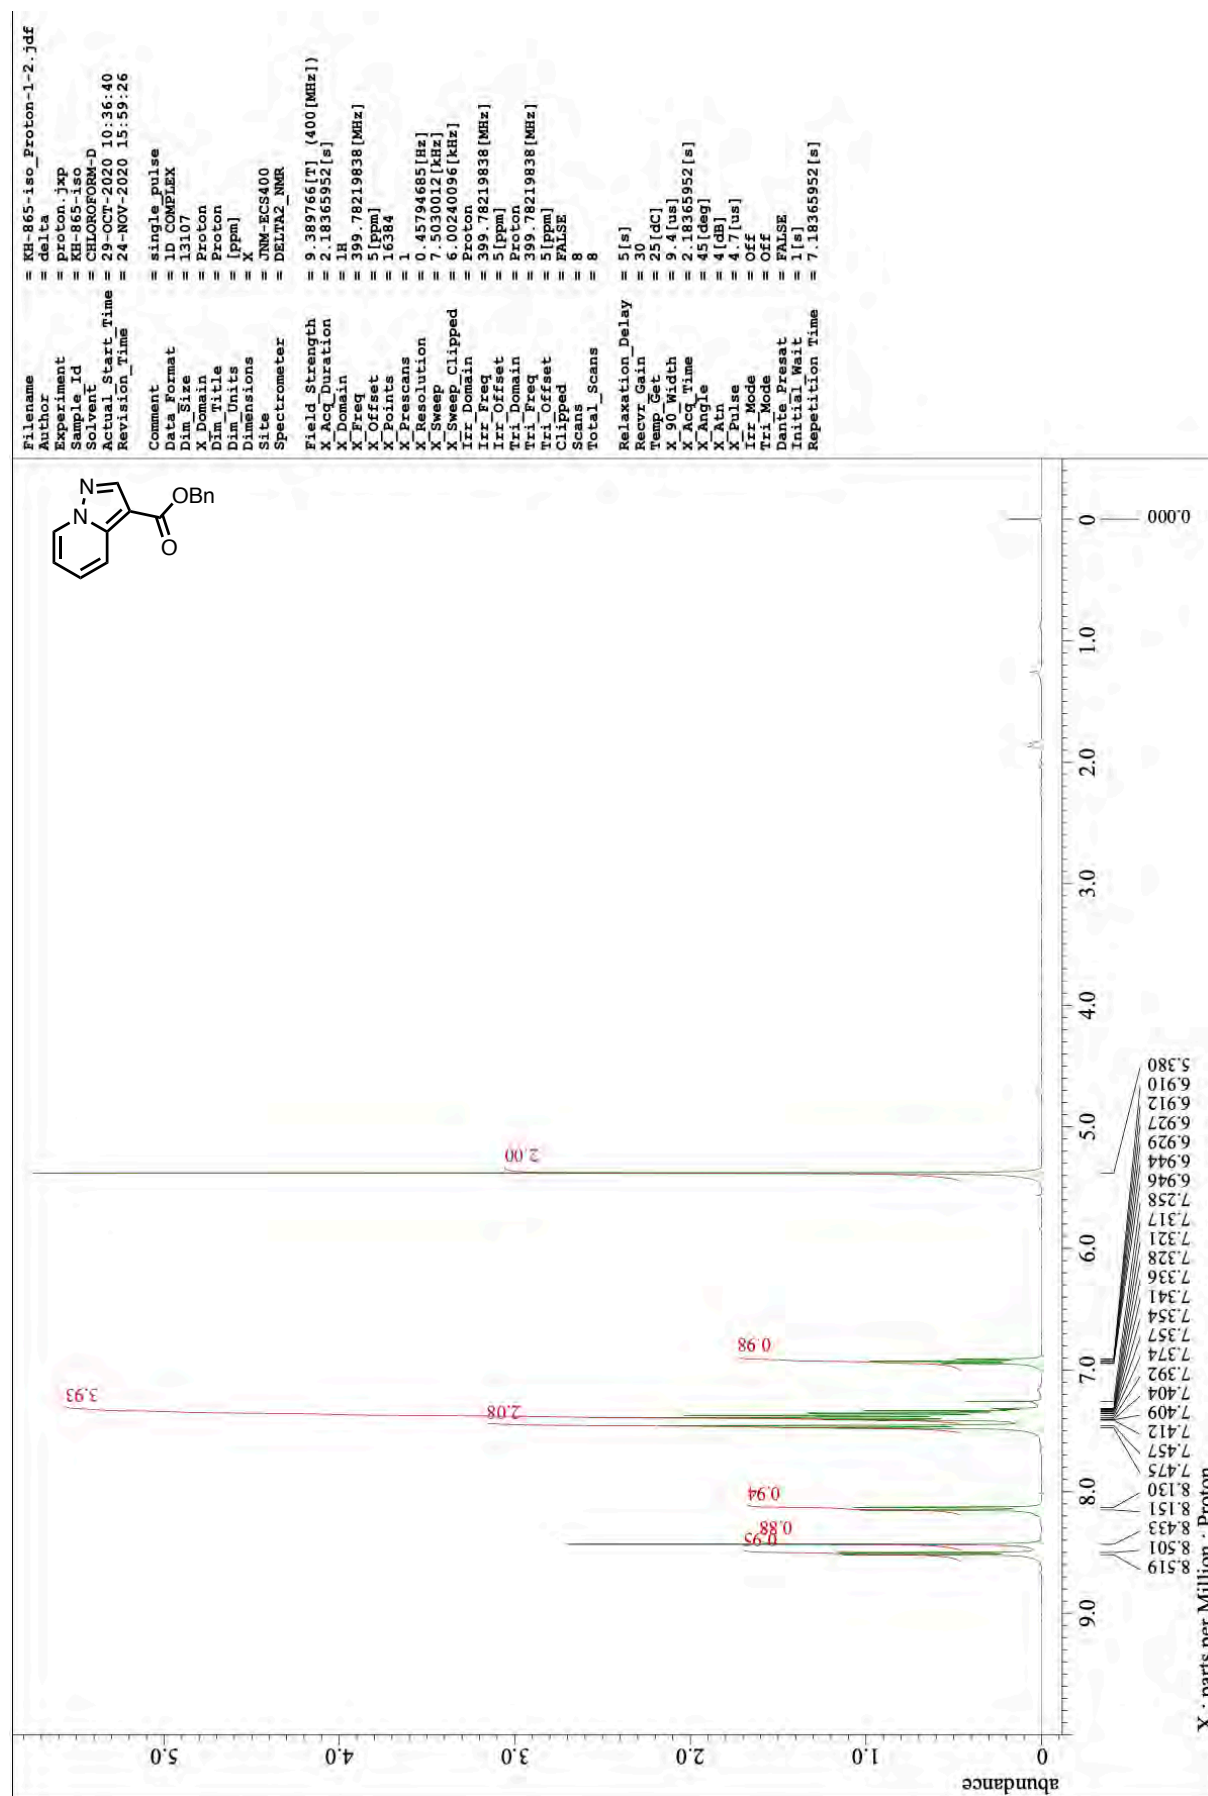

<sup>13</sup>C NMR of 1V (101 MHz, CDCl<sub>3</sub>)

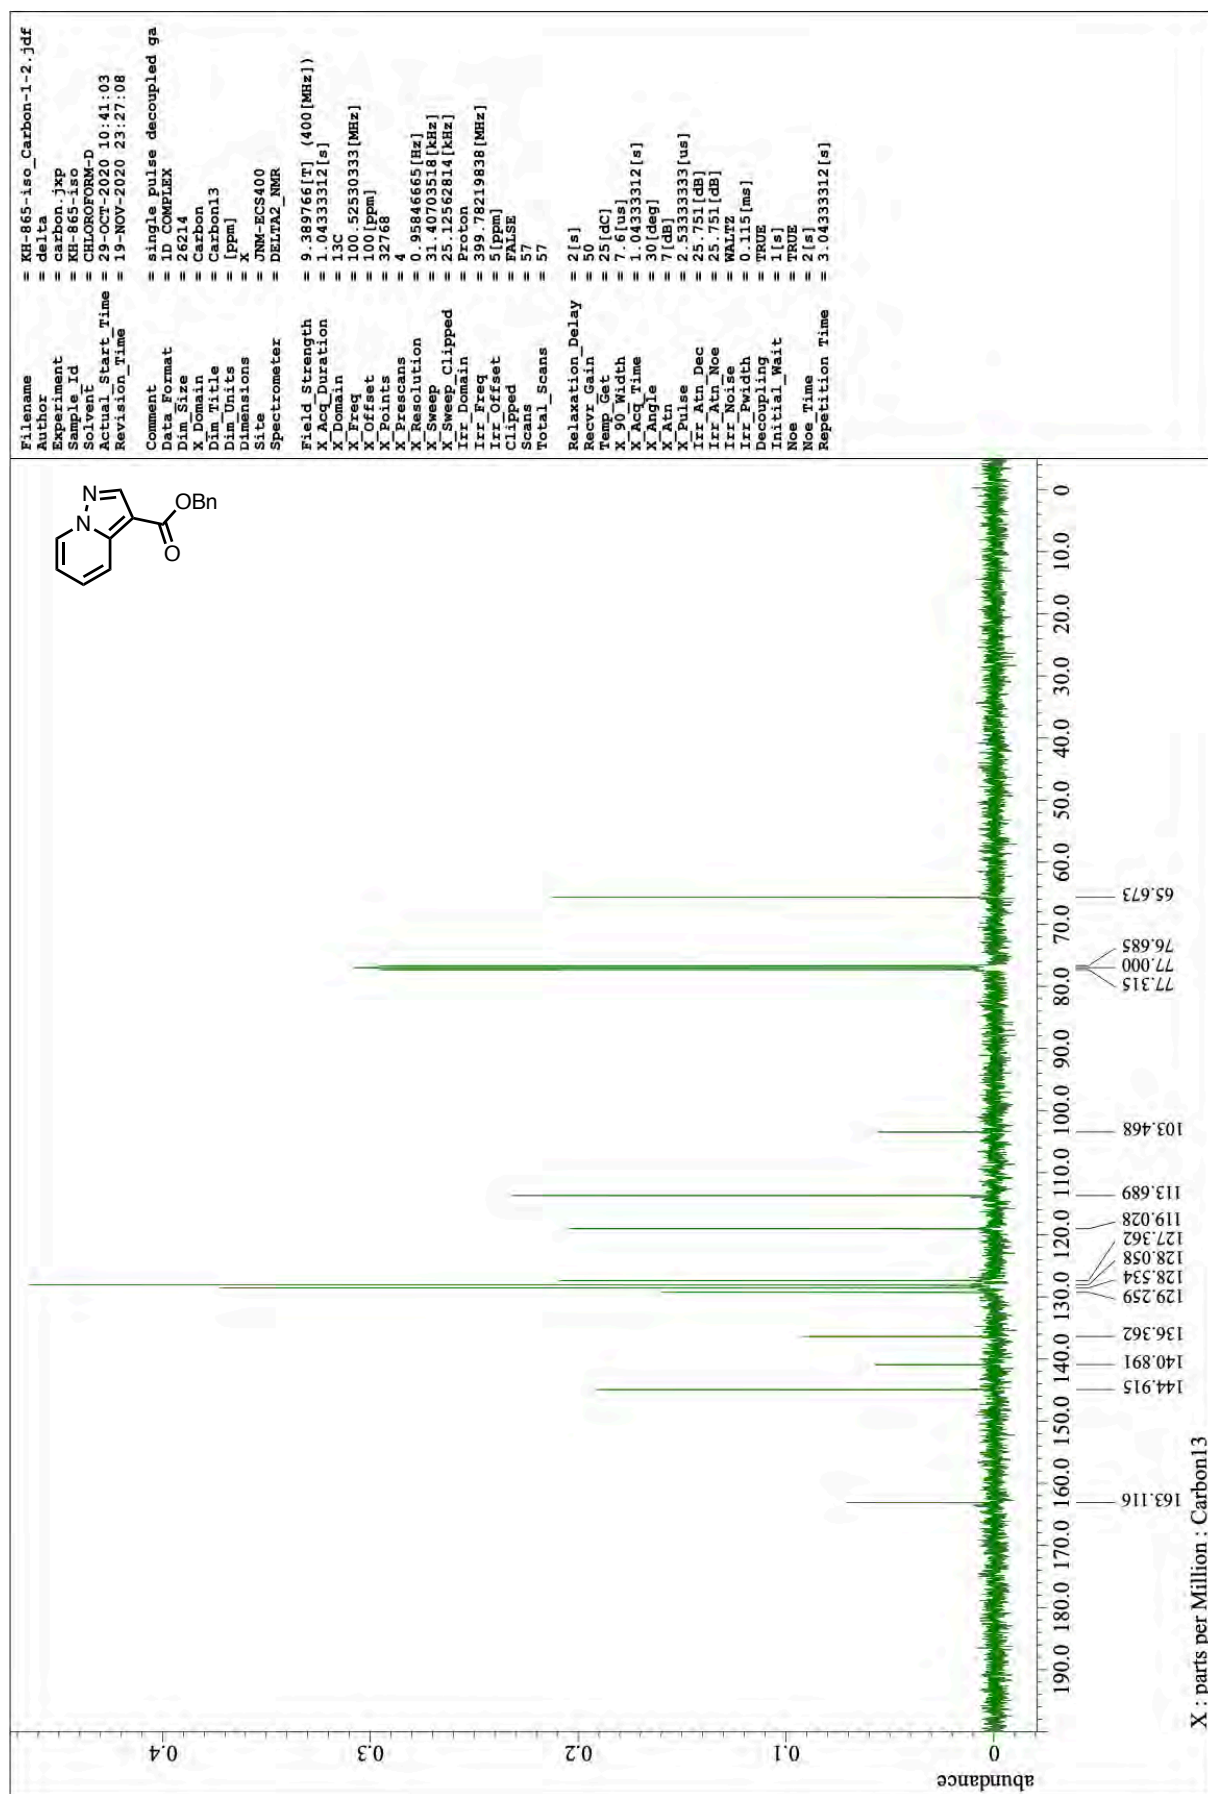

<sup>1</sup>H NMR of 1W (400 MHz, CDCl<sub>3</sub>)

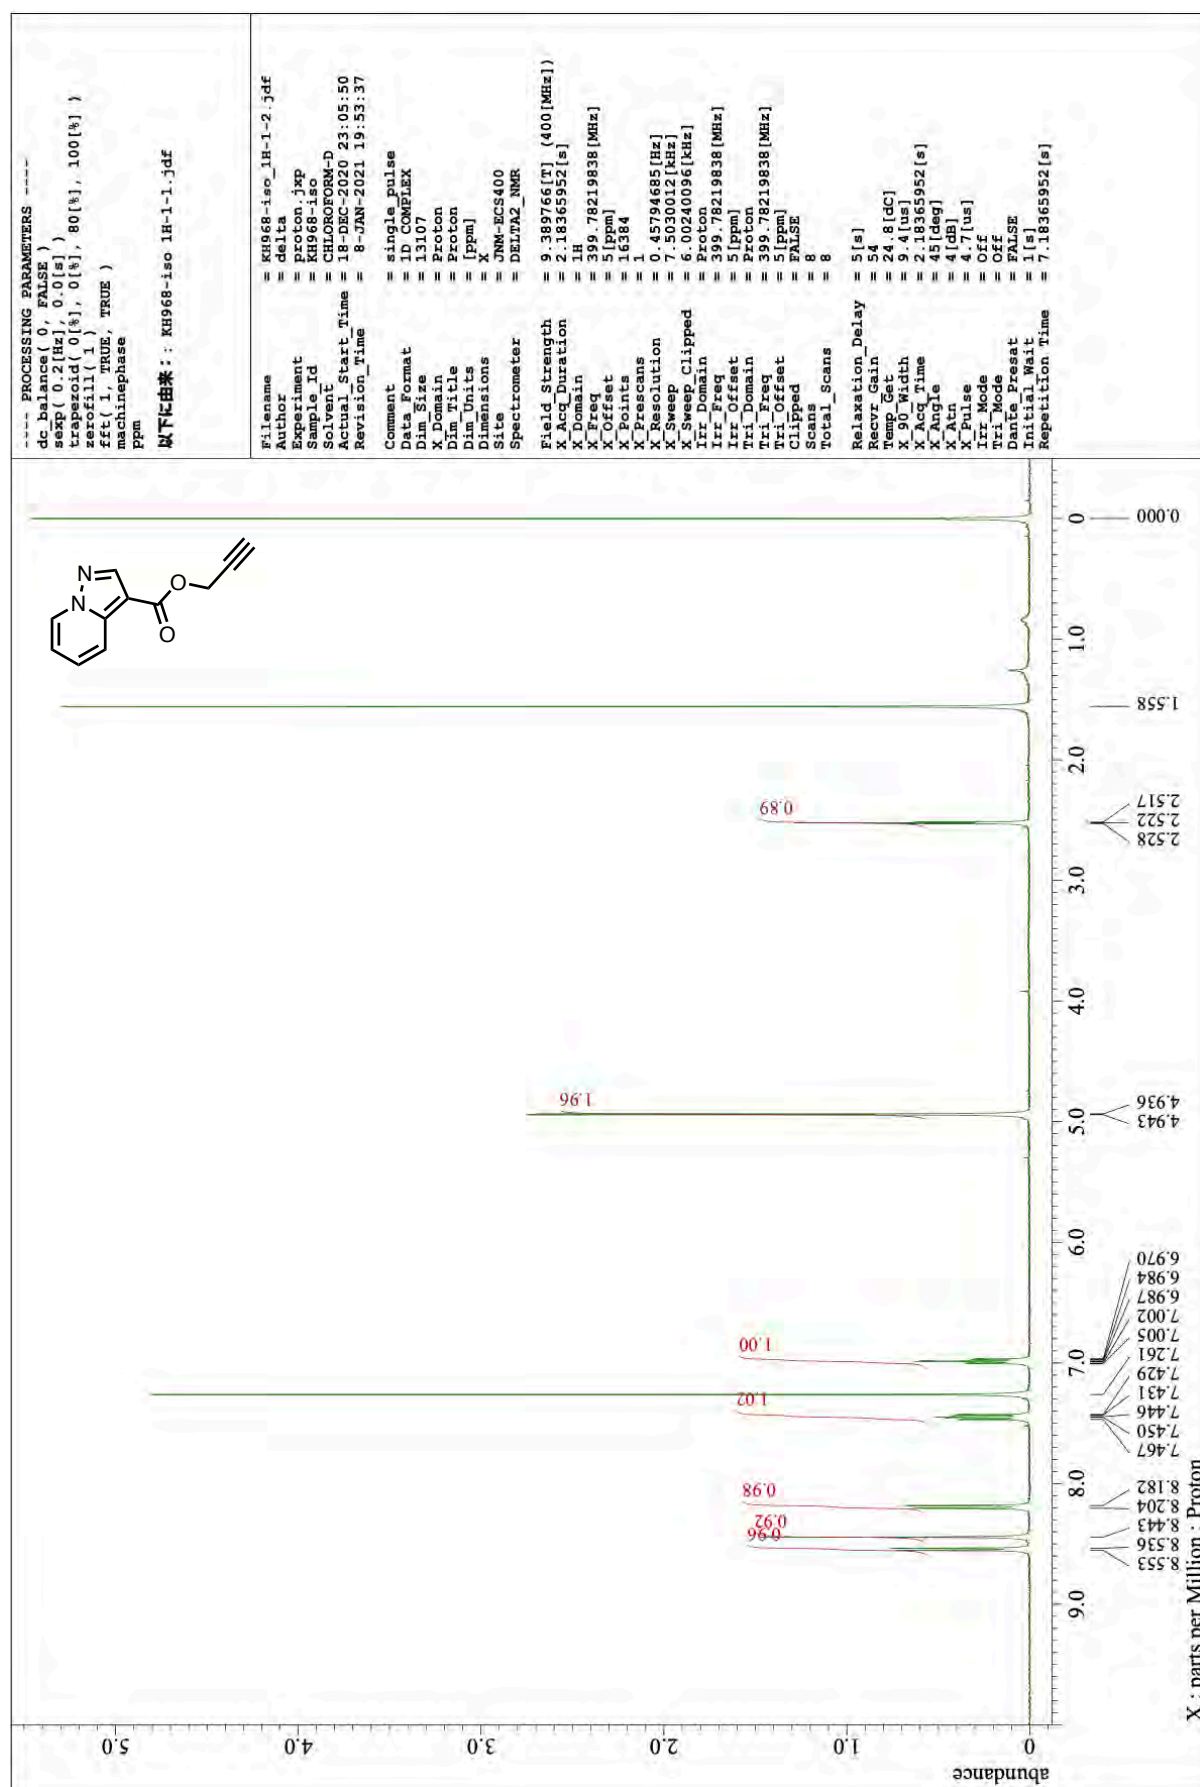

<sup>13</sup>C NMR of **1W** (101 MHz, CDCl<sub>3</sub>)

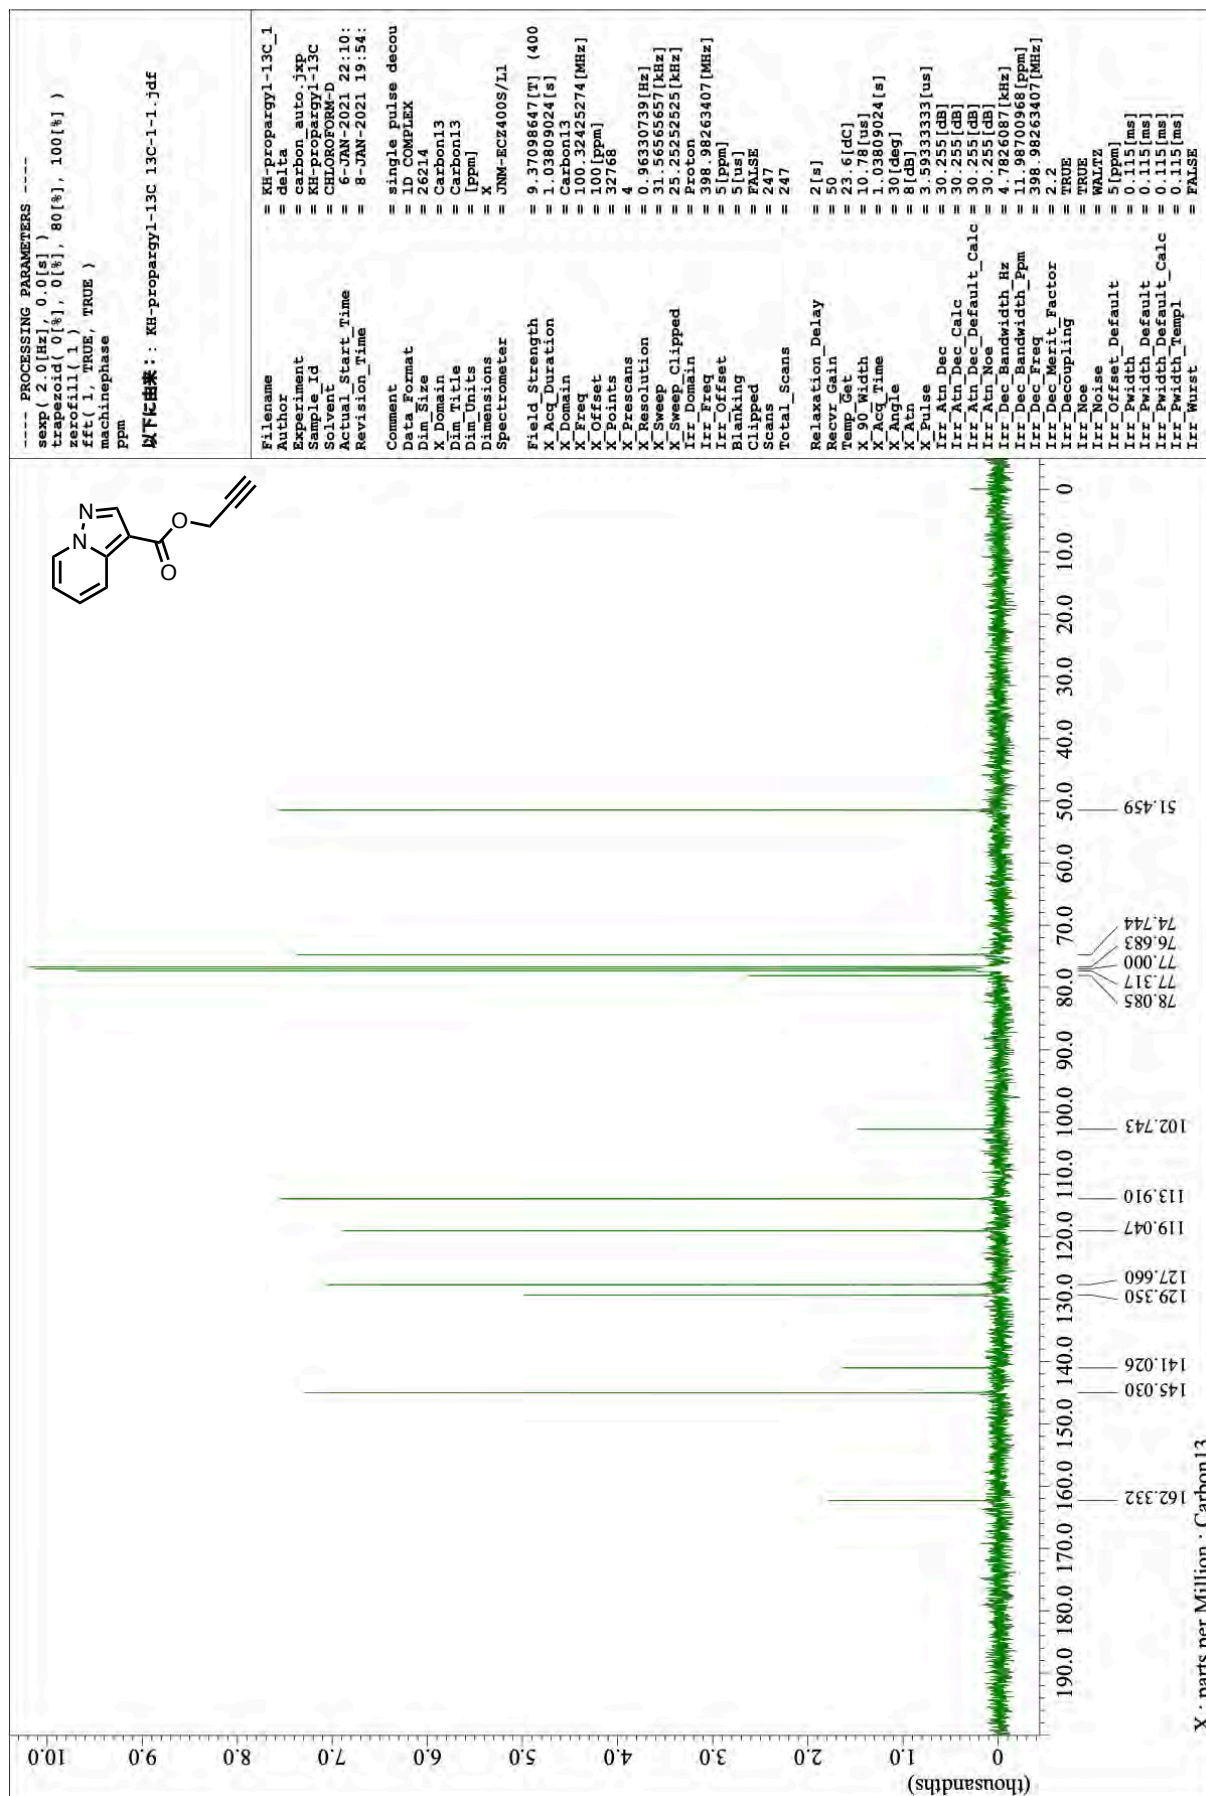

<sup>1</sup>H NMR of 1X (400 MHz, CDCl<sub>3</sub>)

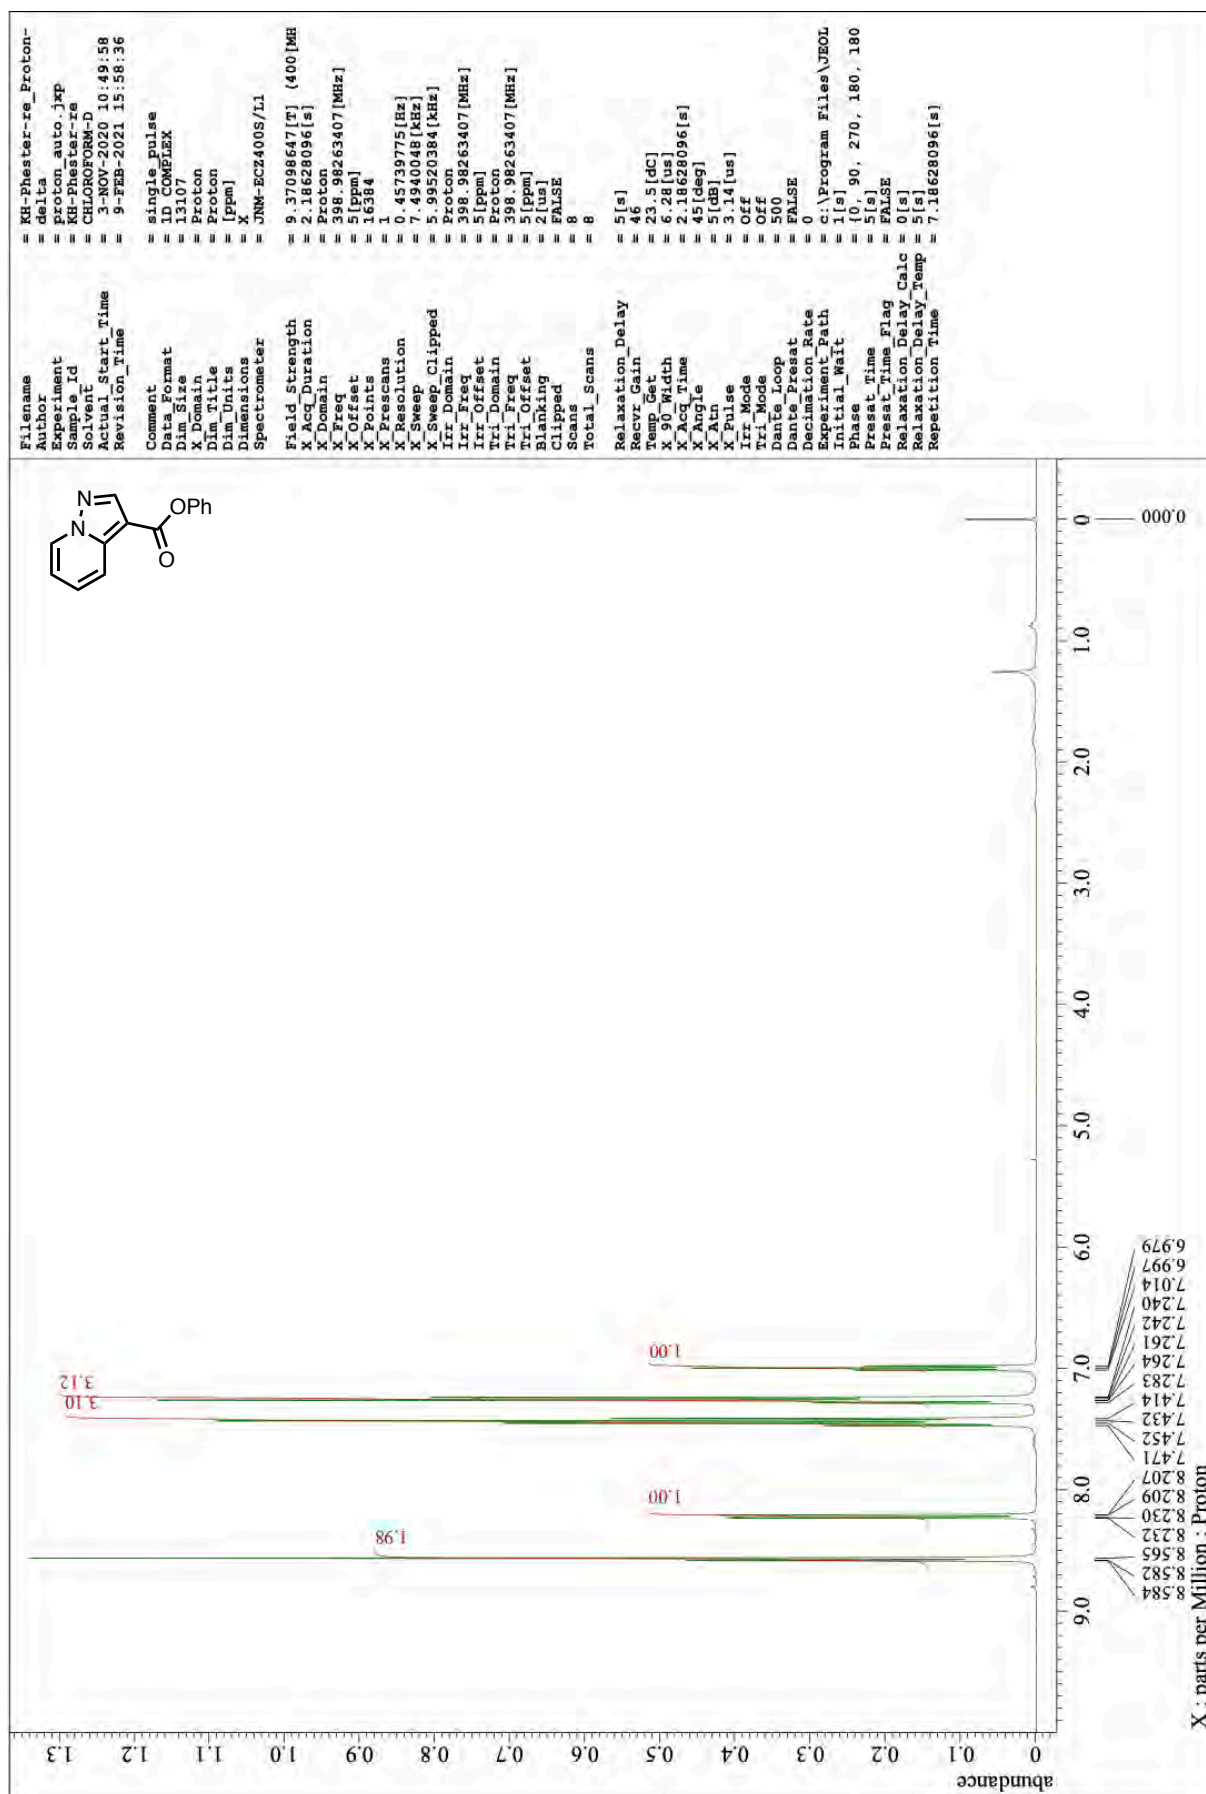

<sup>13</sup>C NMR of IX (101 MHz, CDCl<sub>3</sub>)

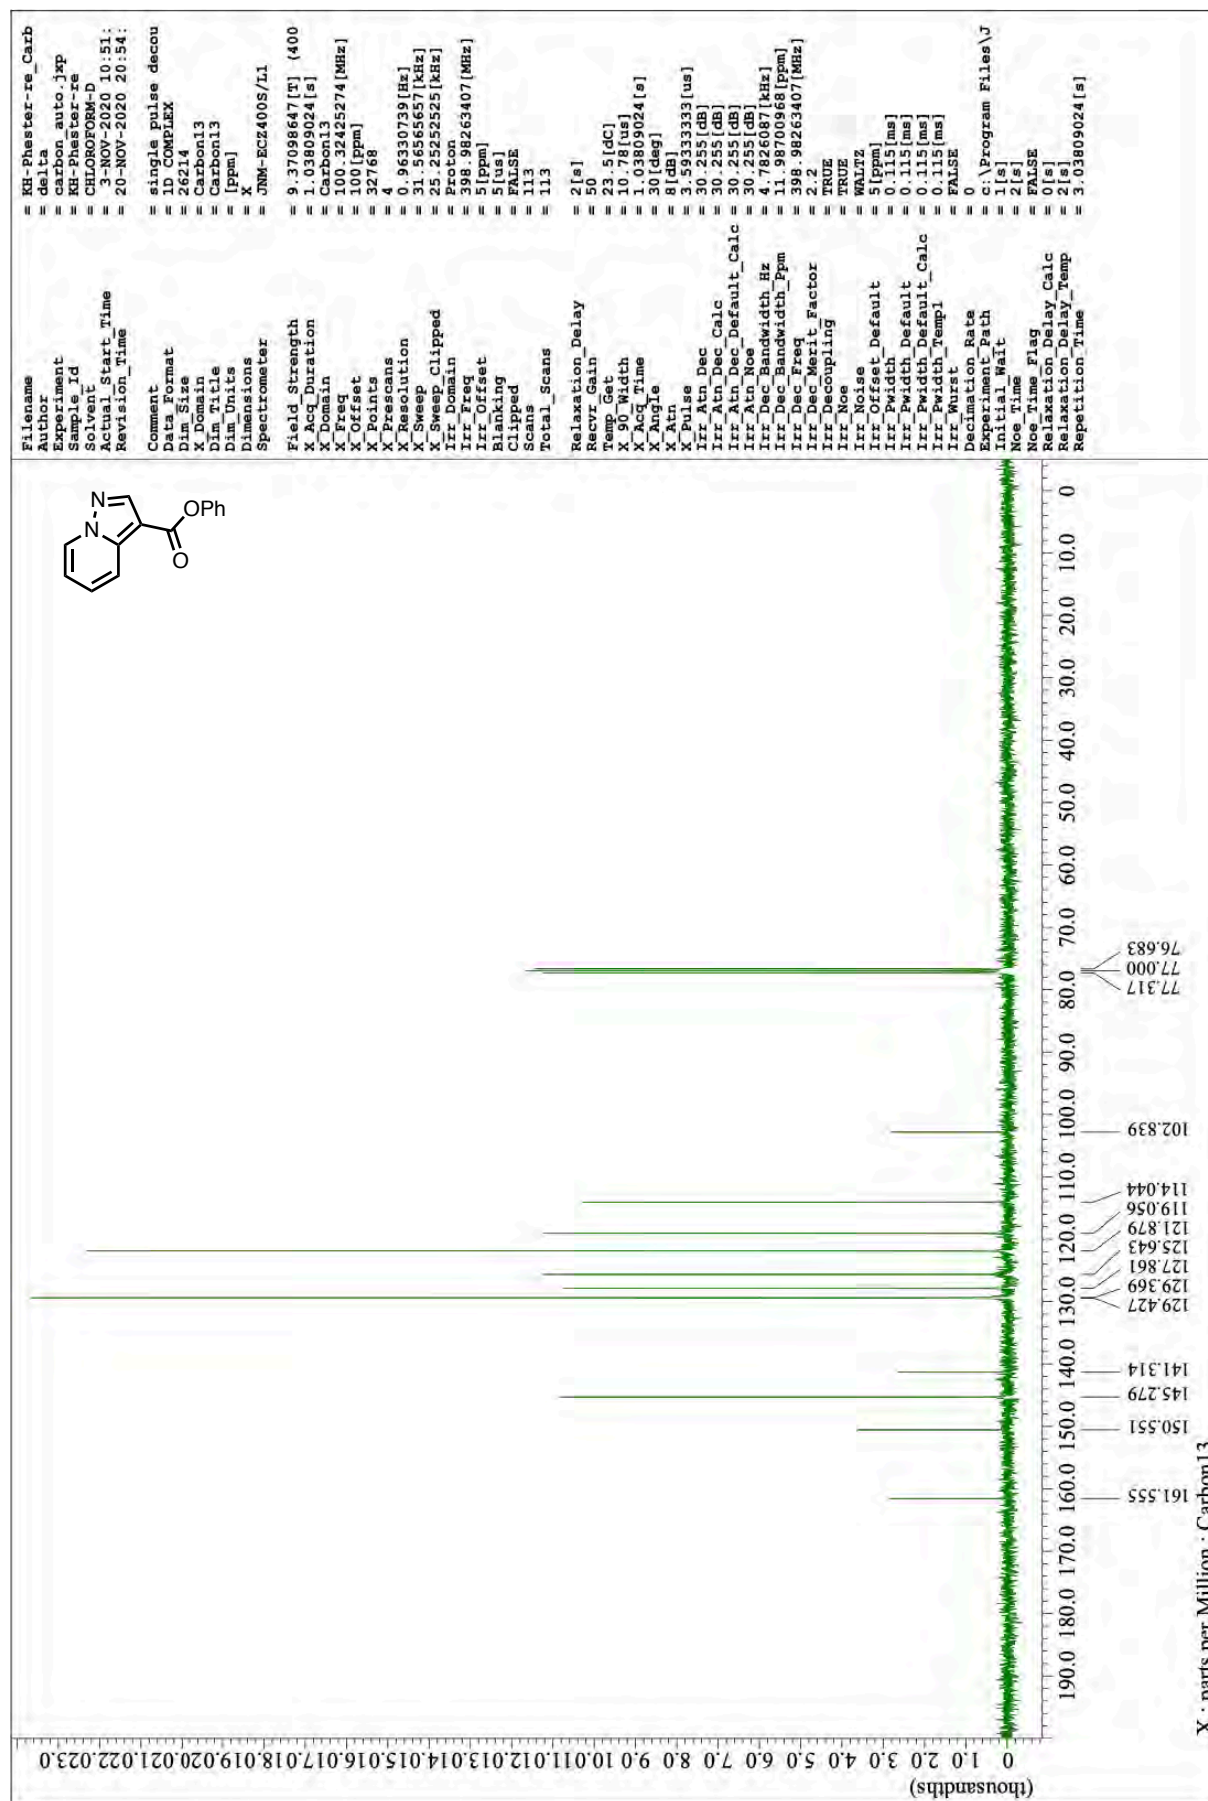



<sup>1</sup>H NMR of 1Z (400 MHz, CDCl<sub>3</sub>)

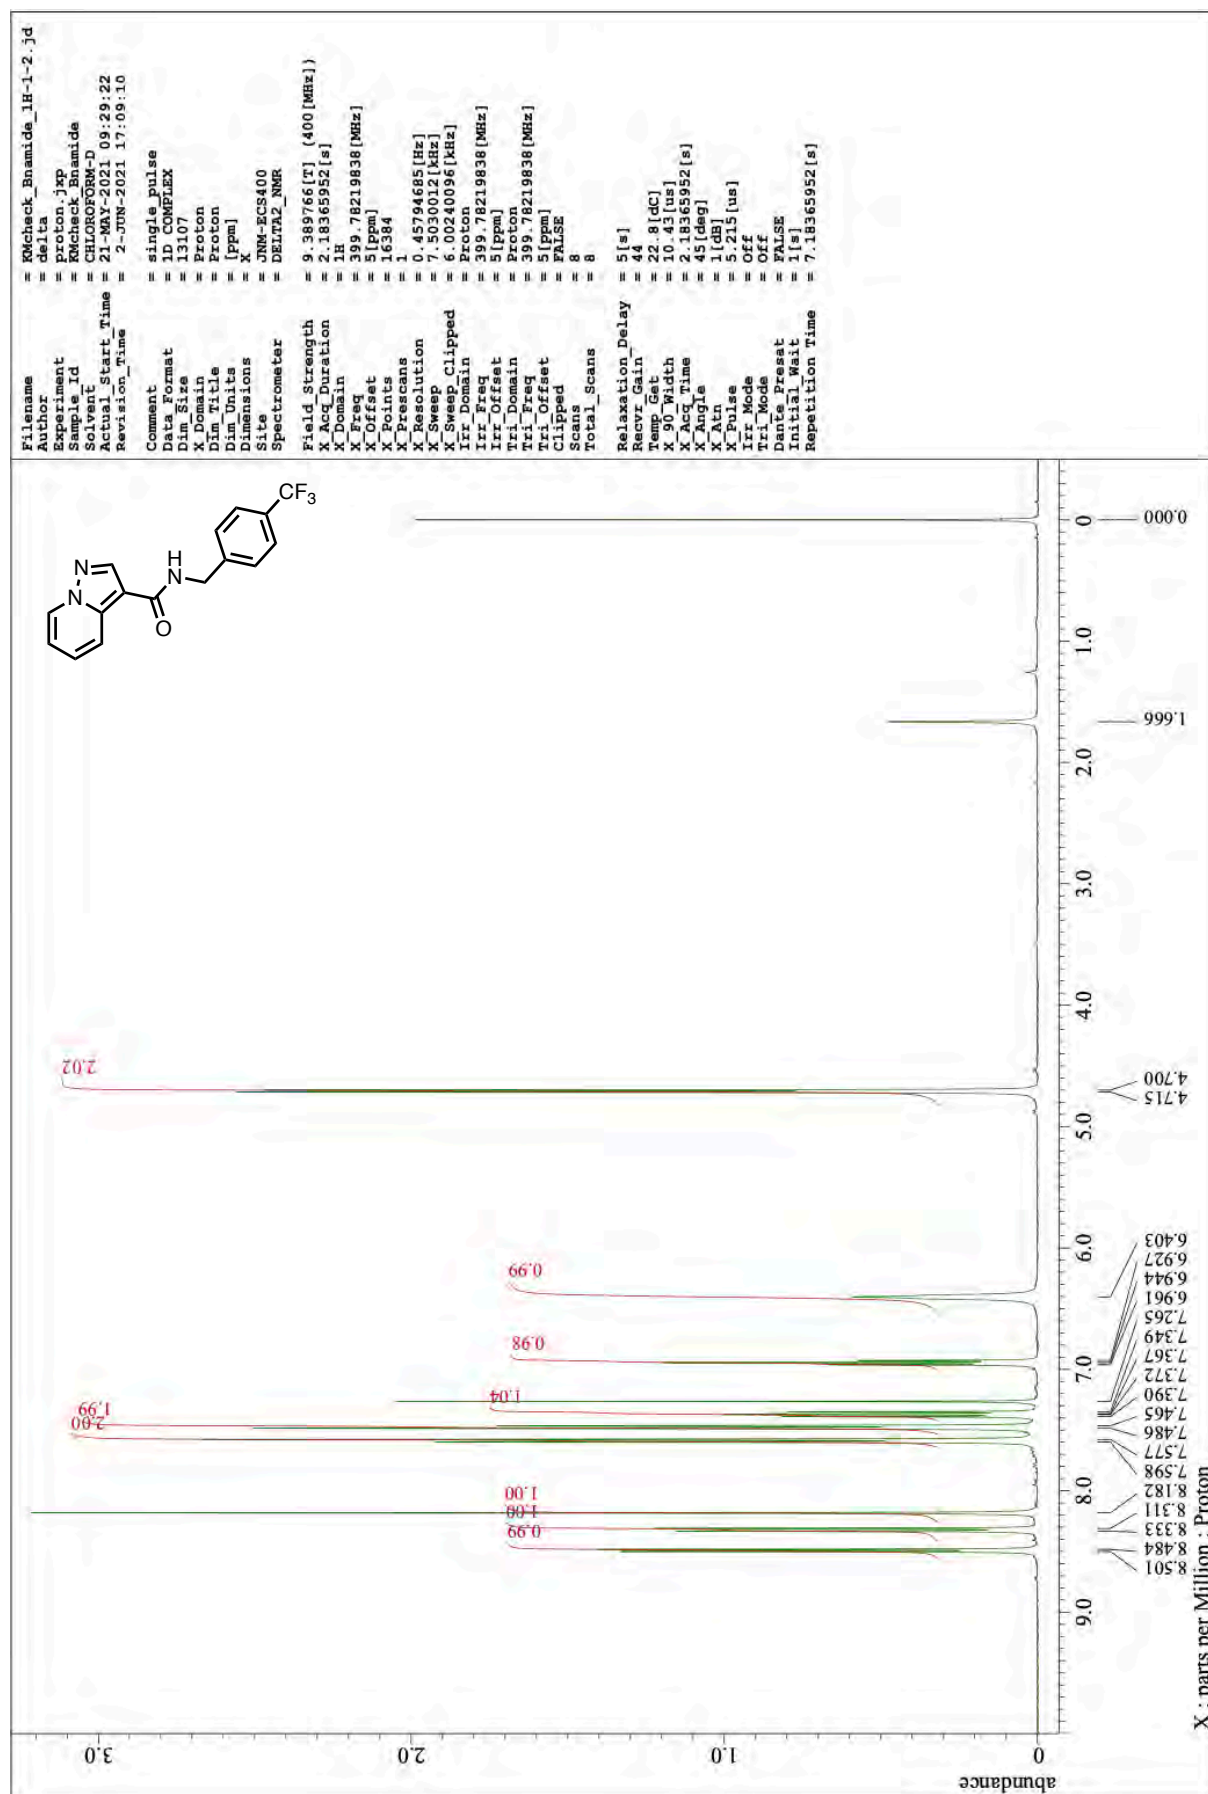

<sup>13</sup>C NMR of 1Z (101 MHz, CDCl<sub>3</sub>)

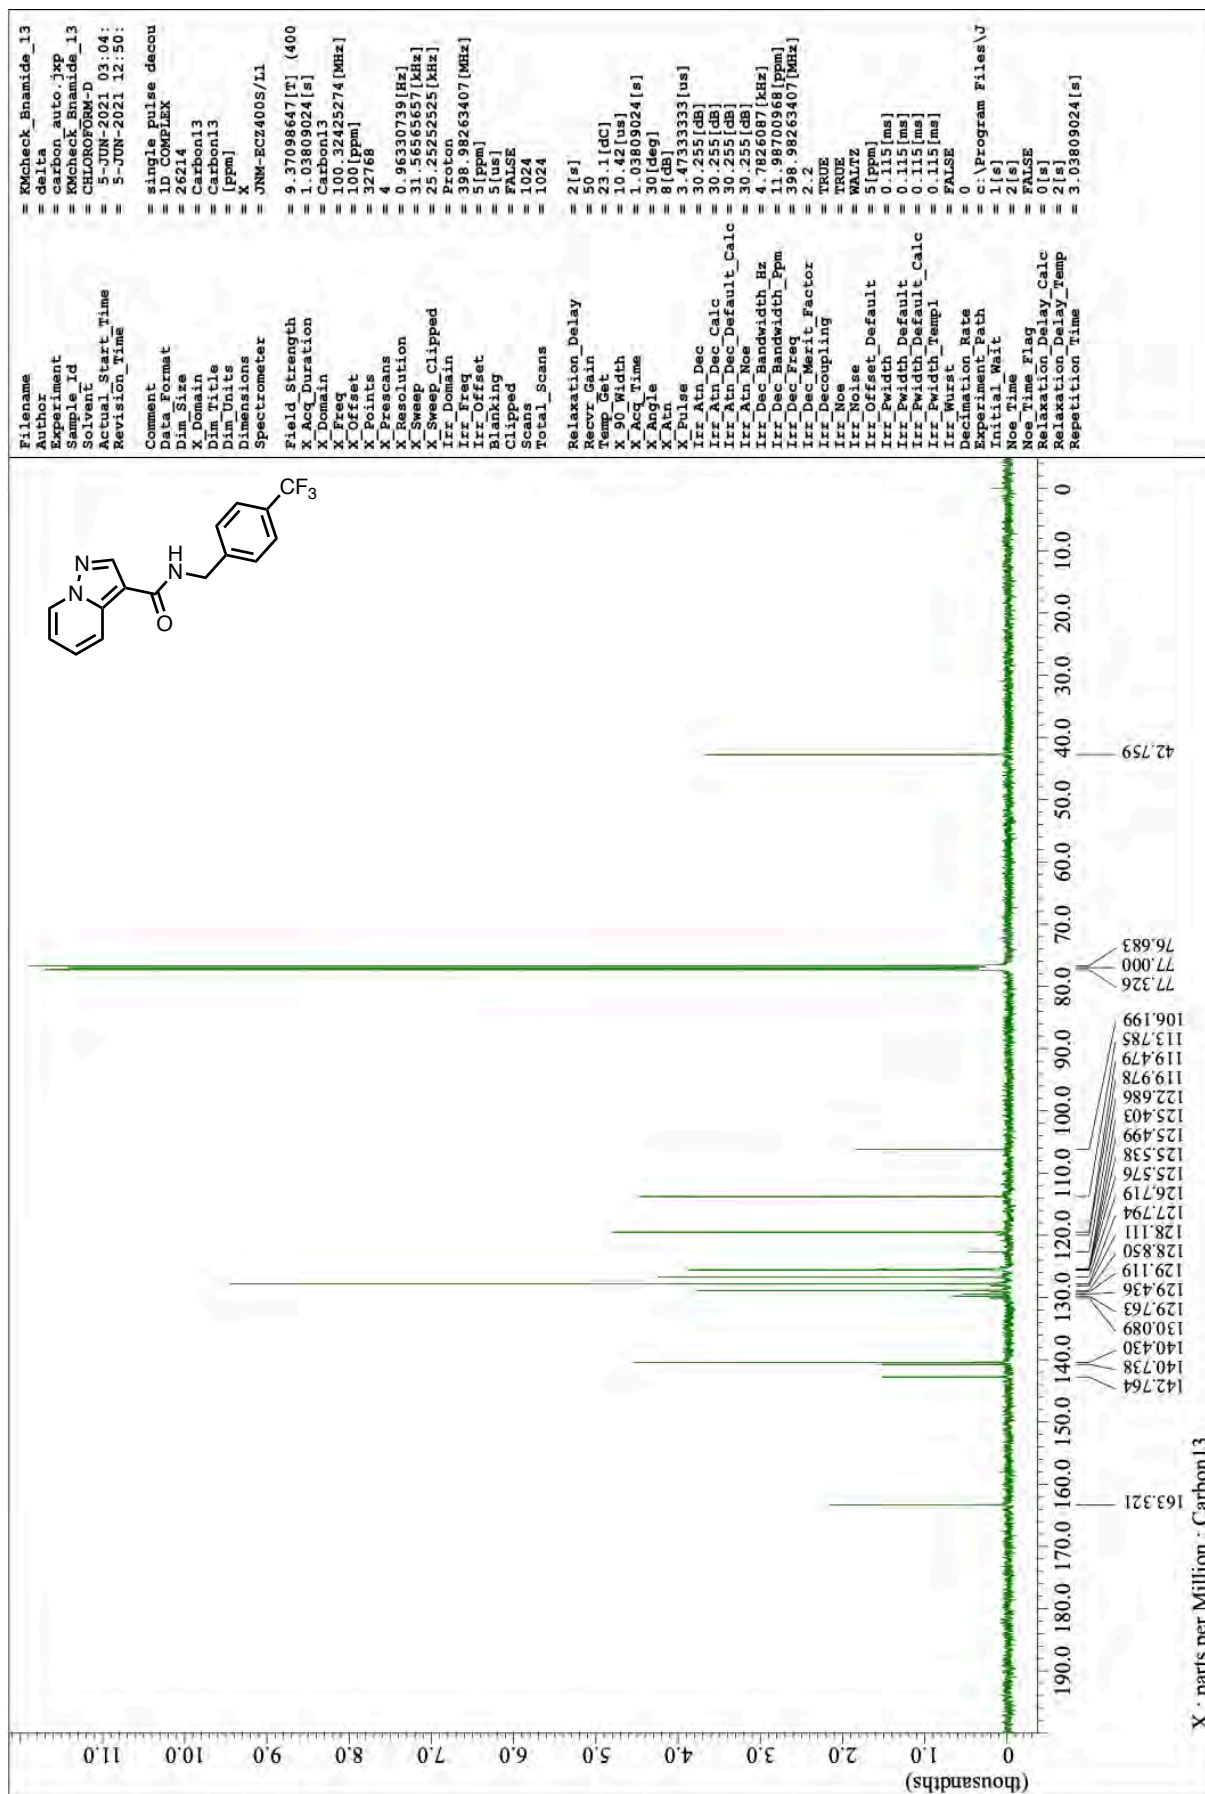

<sup>19</sup>F NMR of 1Z (376 MHz, CDCl<sub>3</sub>)

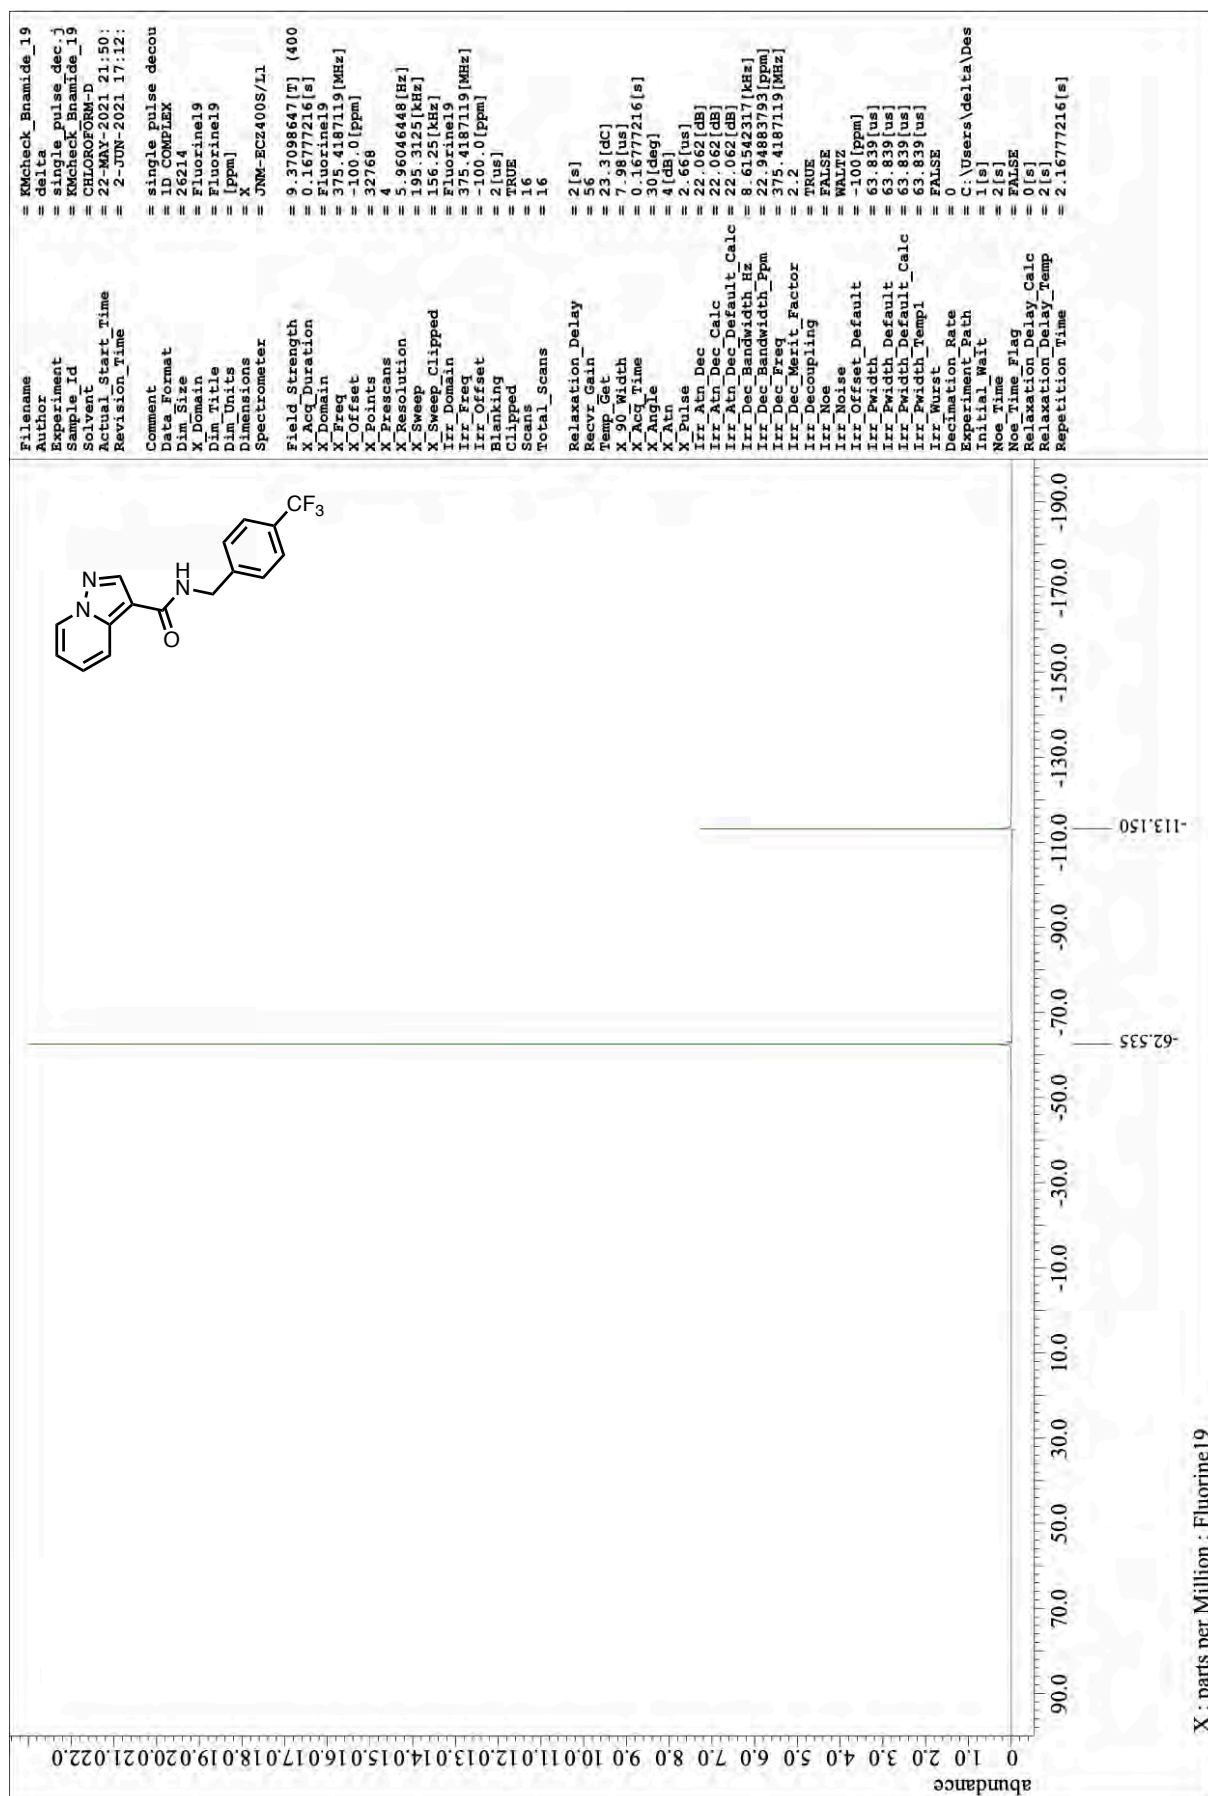

X : parts per Million : Fluorine19

<sup>1</sup>H NMR of 1AA (400 MHz, CDCl<sub>3</sub>)

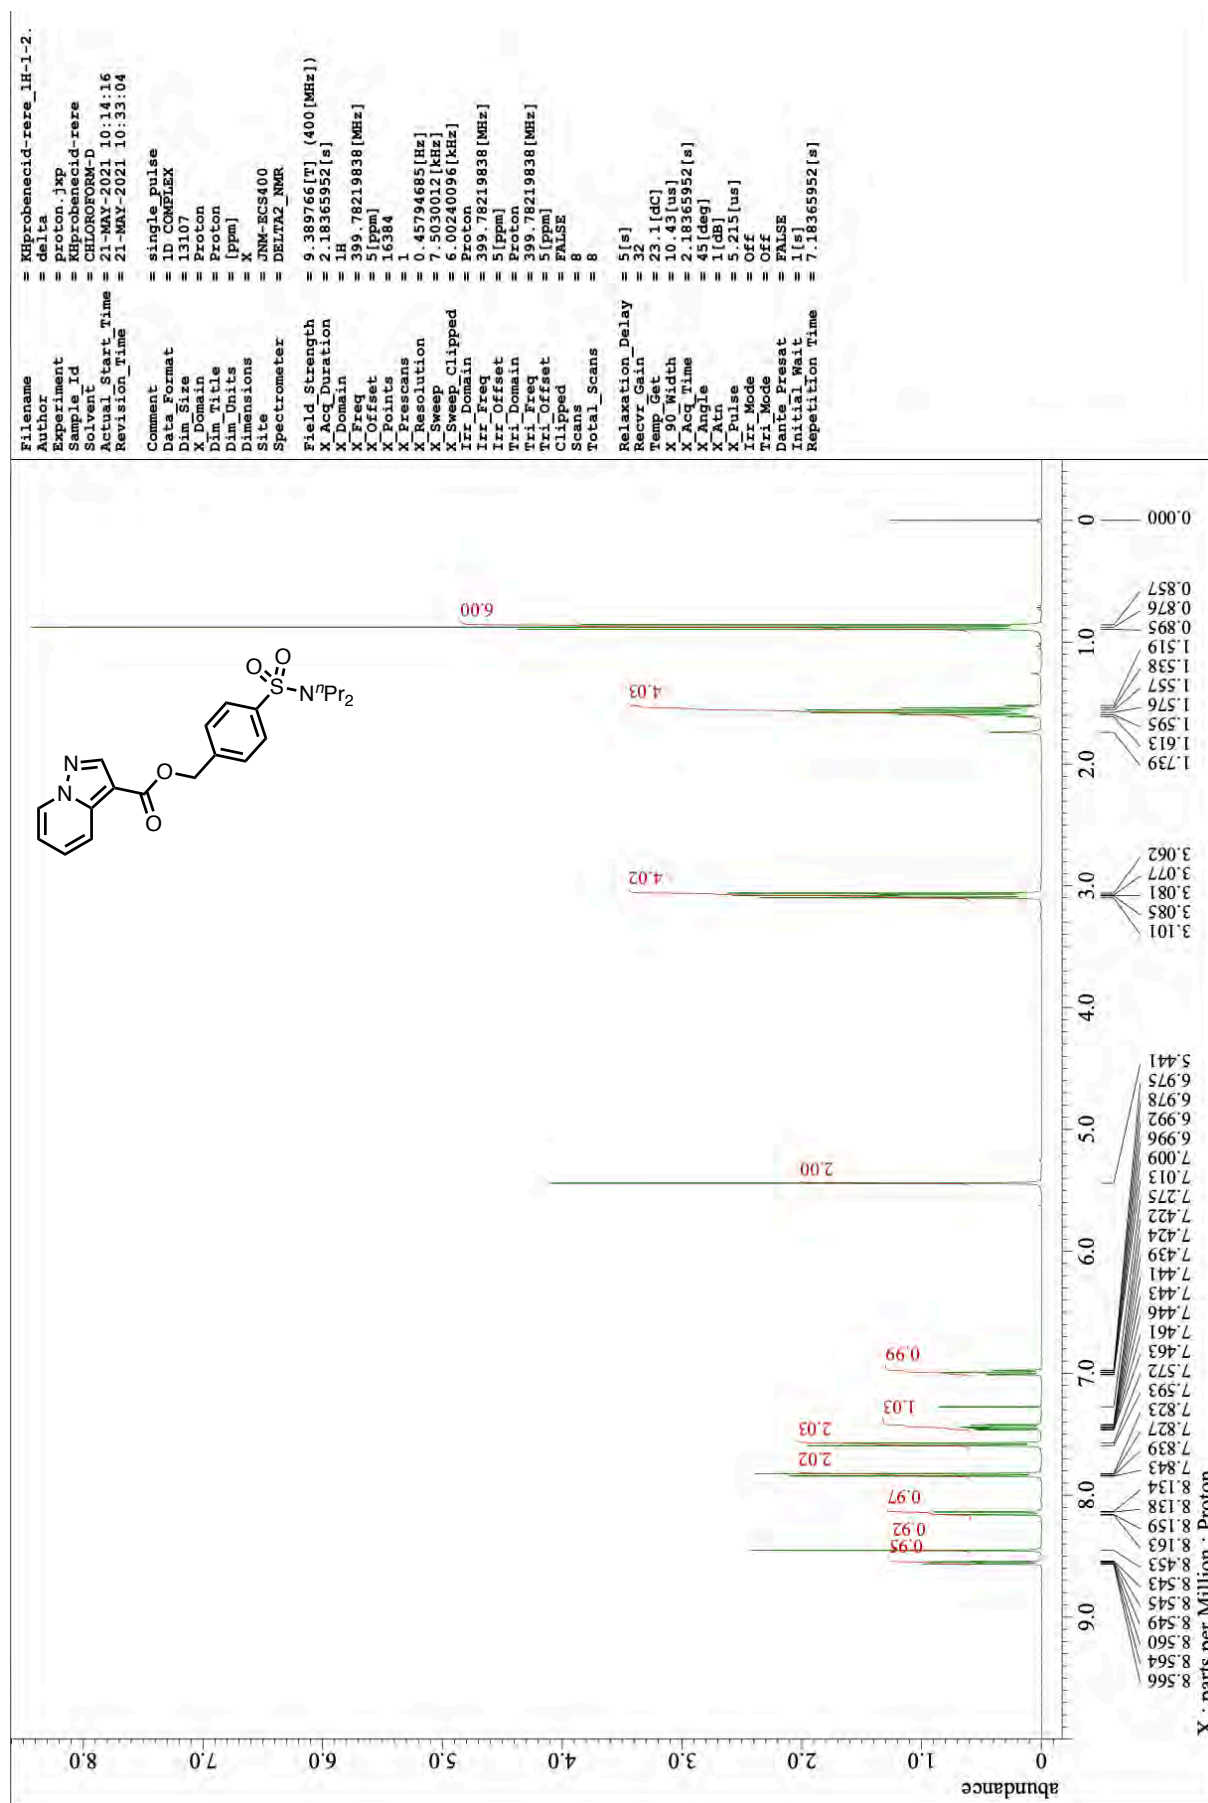

<sup>13</sup>C NMR of 1AA (101 MHz, CDCl<sub>3</sub>)

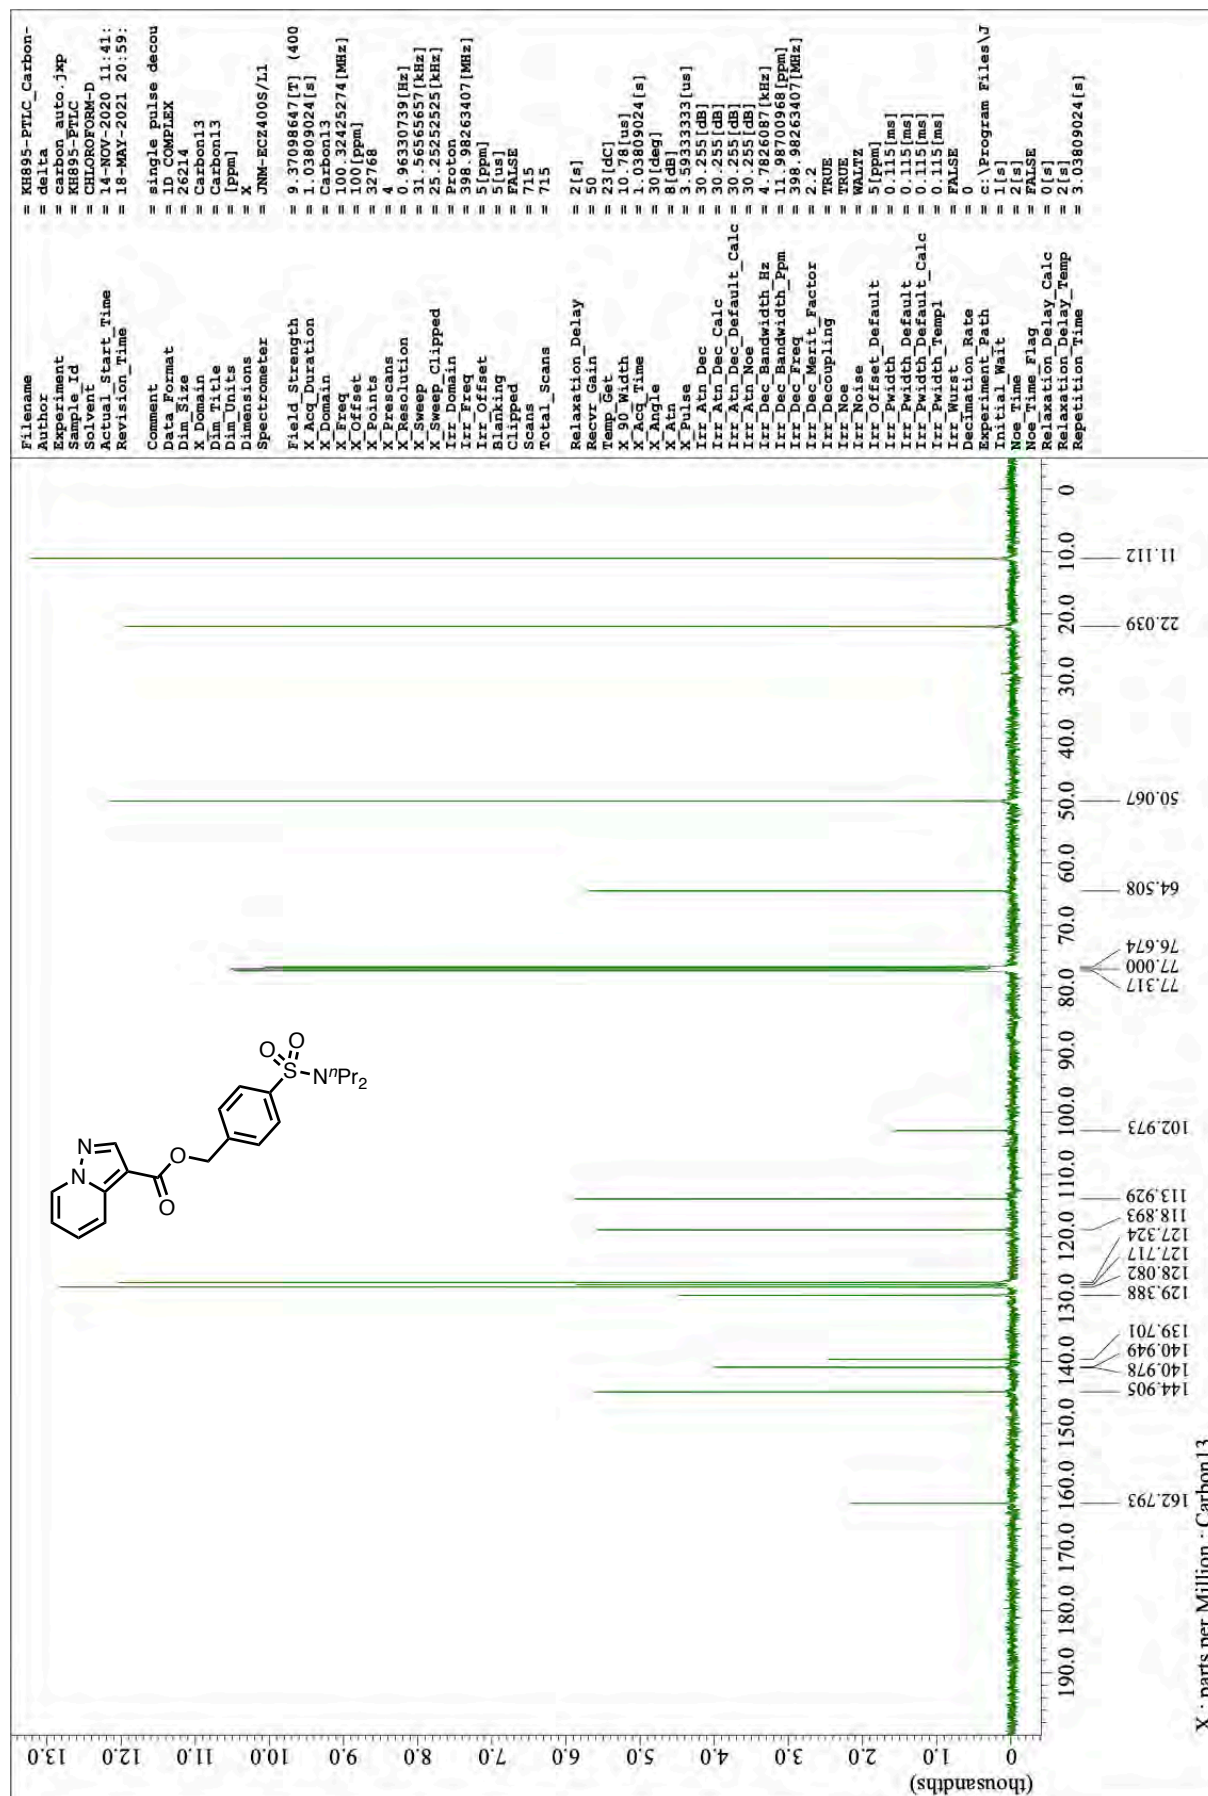

<sup>1</sup>H NMR of 1AB (400 MHz, CDCl<sub>3</sub>)

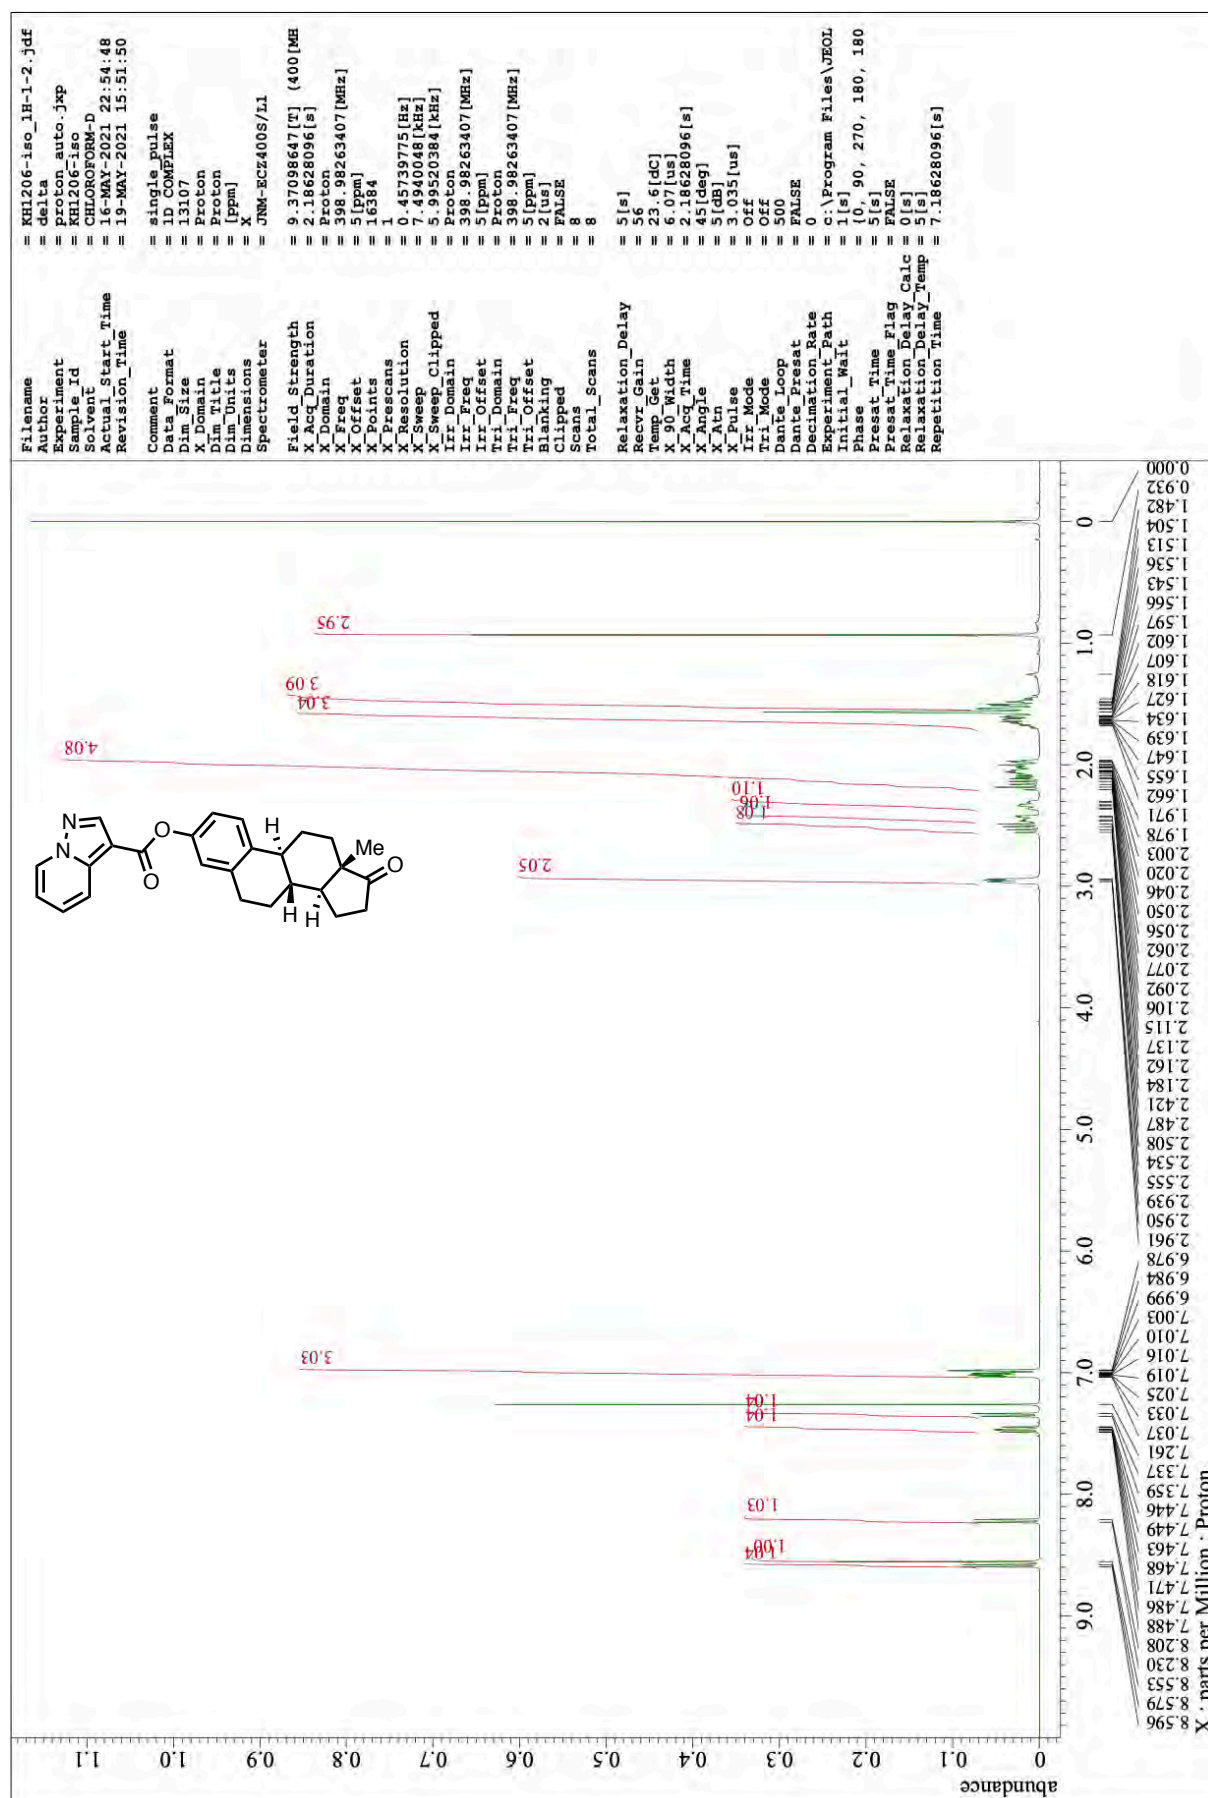

<sup>13</sup>C NMR of **1AB** (101 MHz, CDCl<sub>3</sub>)

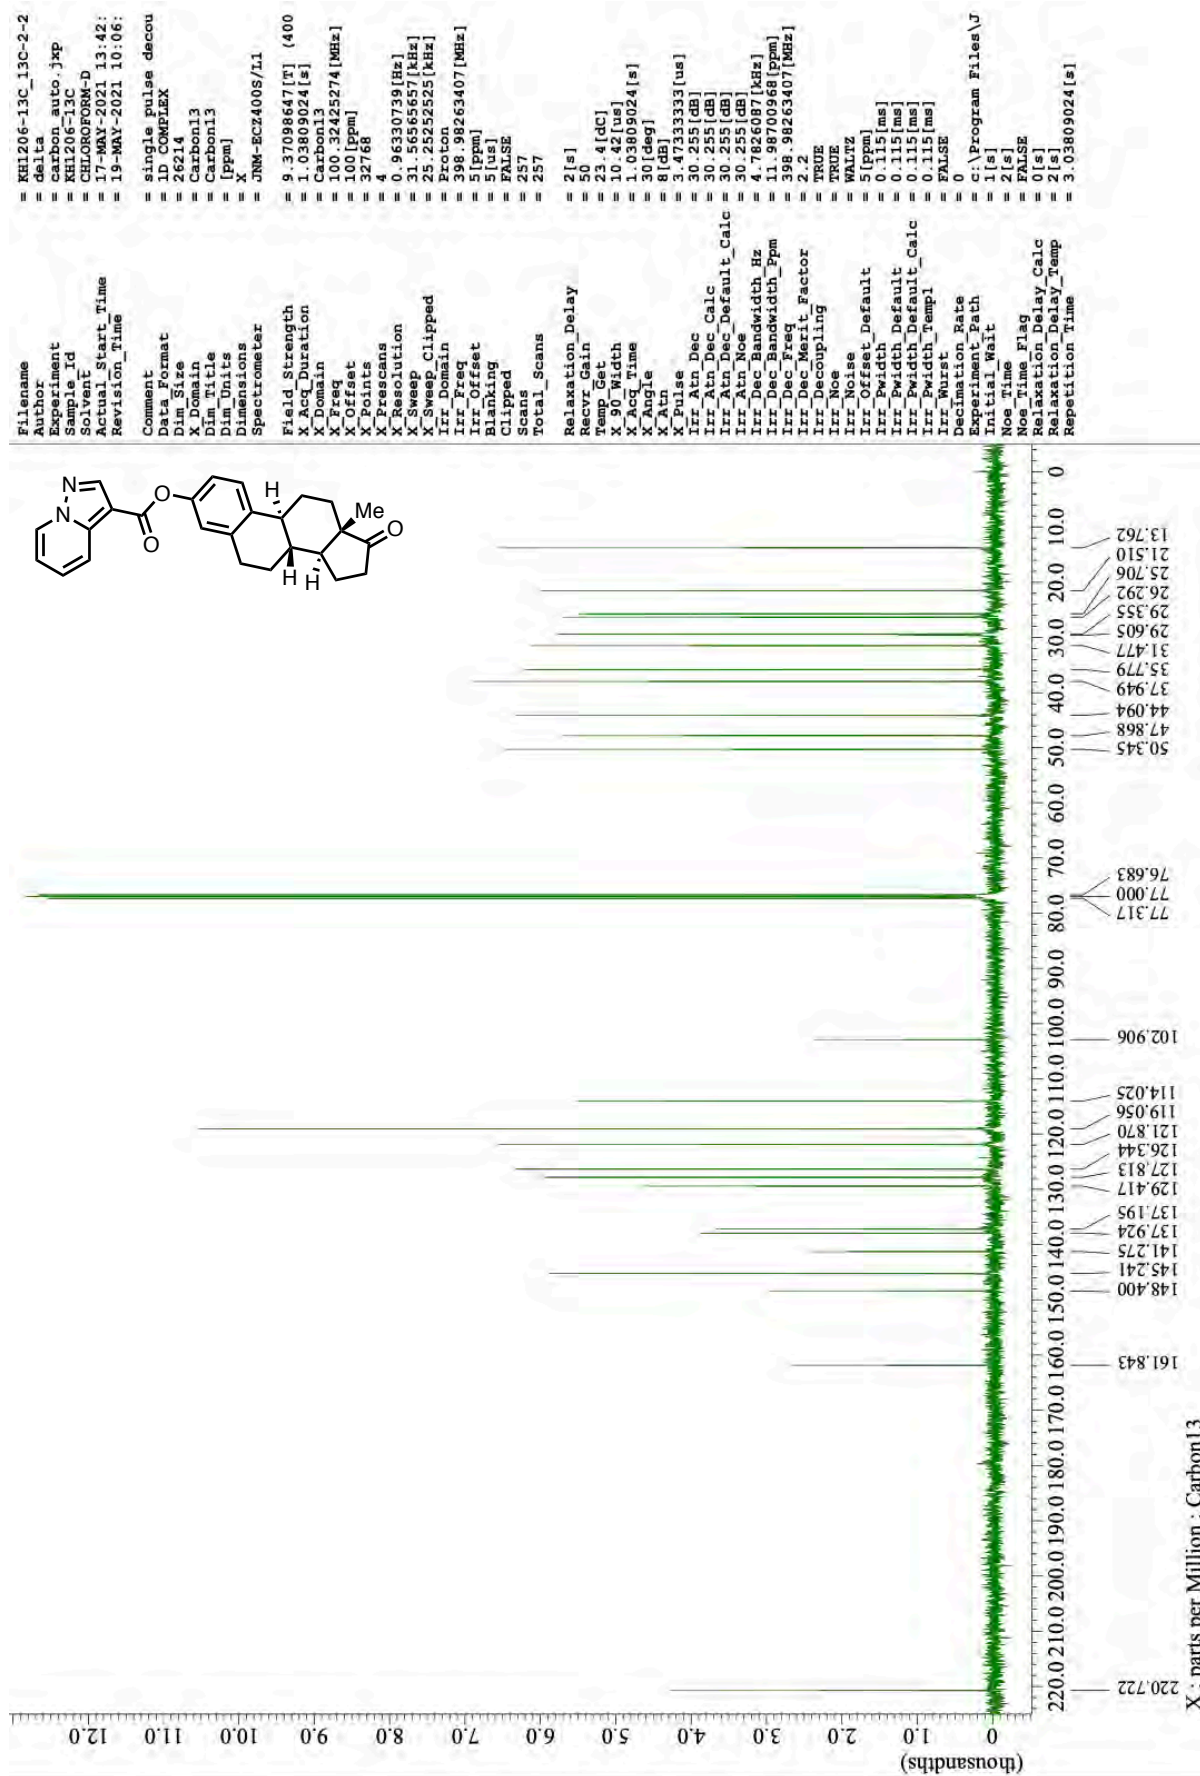

<sup>1</sup>H NMR of 1AC (400 MHz, CDCl<sub>3</sub>)

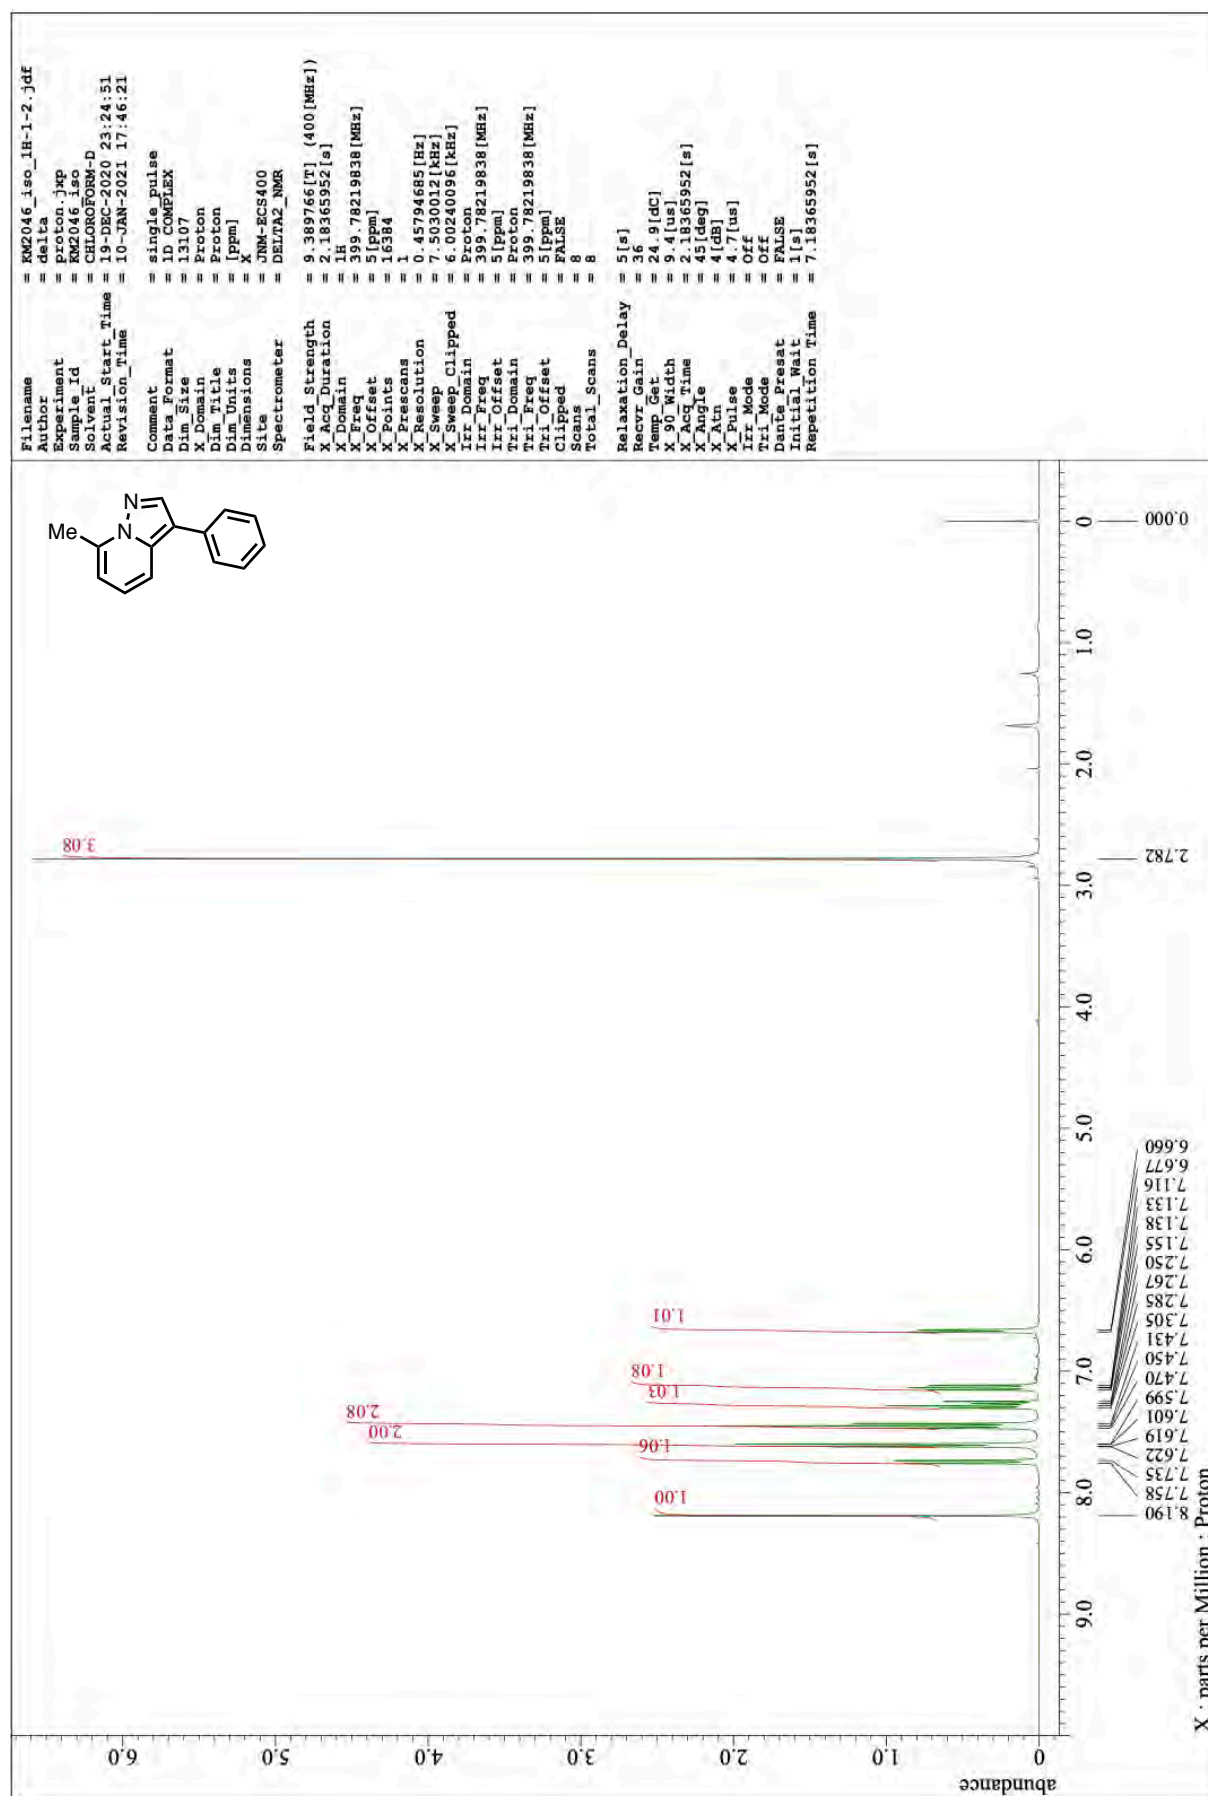



<sup>13</sup>C NMR of IAC (101 MHz, CDCl<sub>3</sub>)

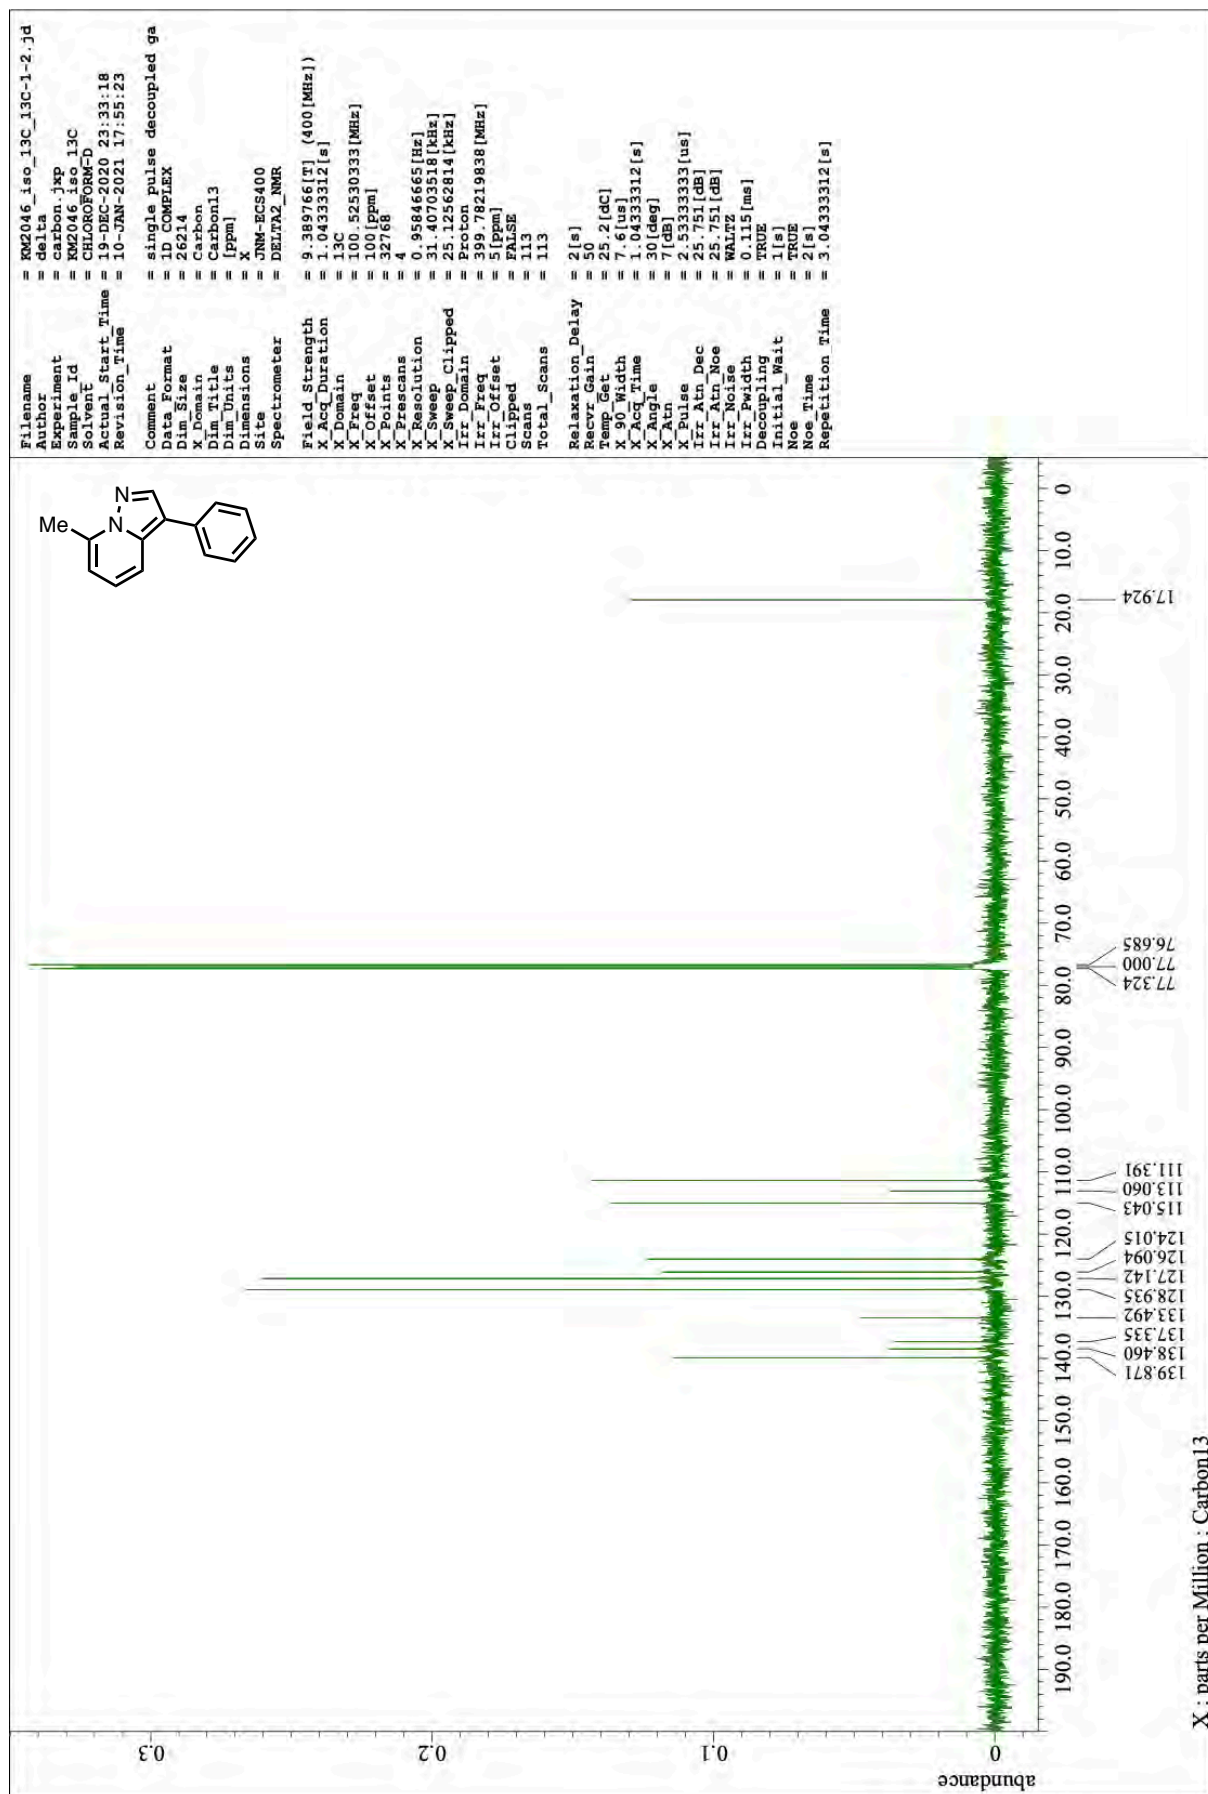

<sup>1</sup>H NMR of 1AD (400 MHz, CDCl<sub>3</sub>)

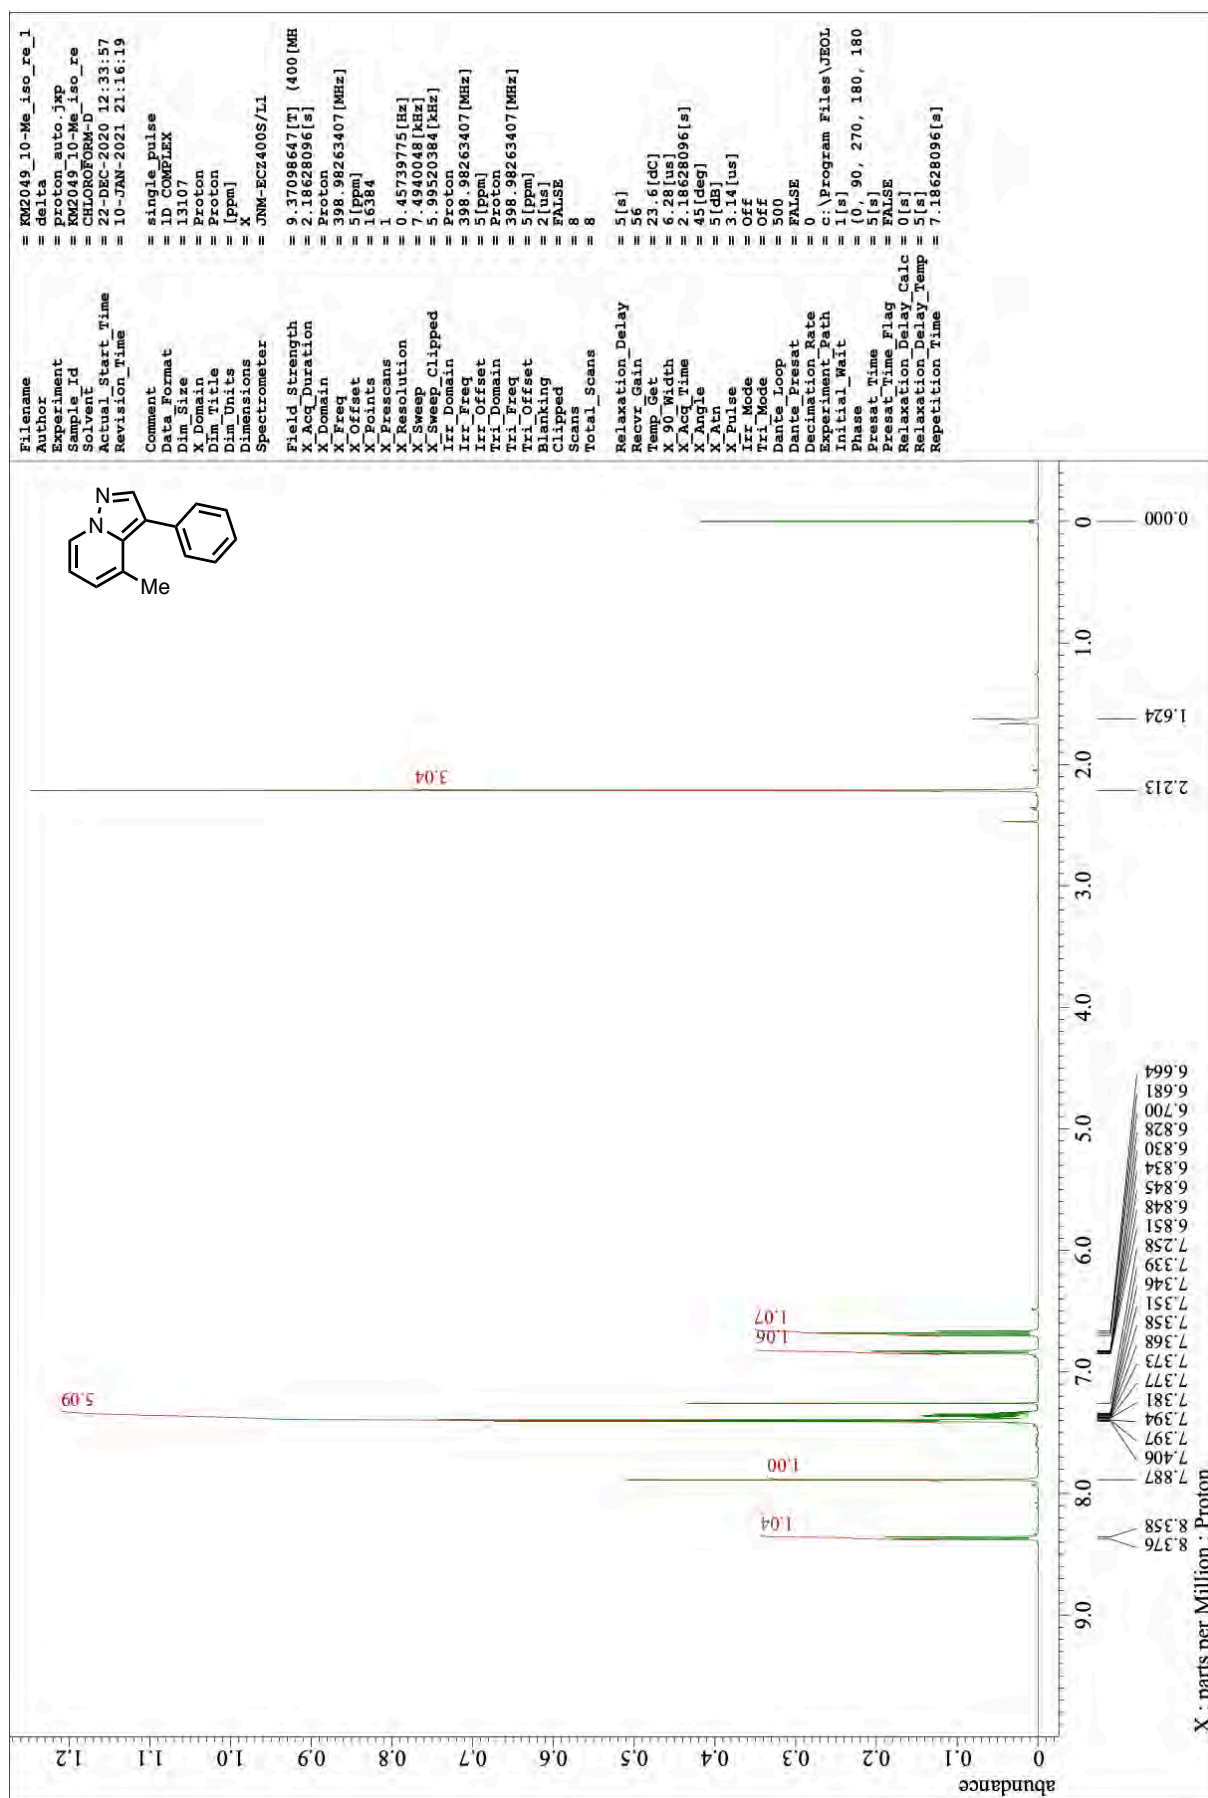

<sup>13</sup>C NMR of 1AD (101 MHz, CDCl<sub>3</sub>)

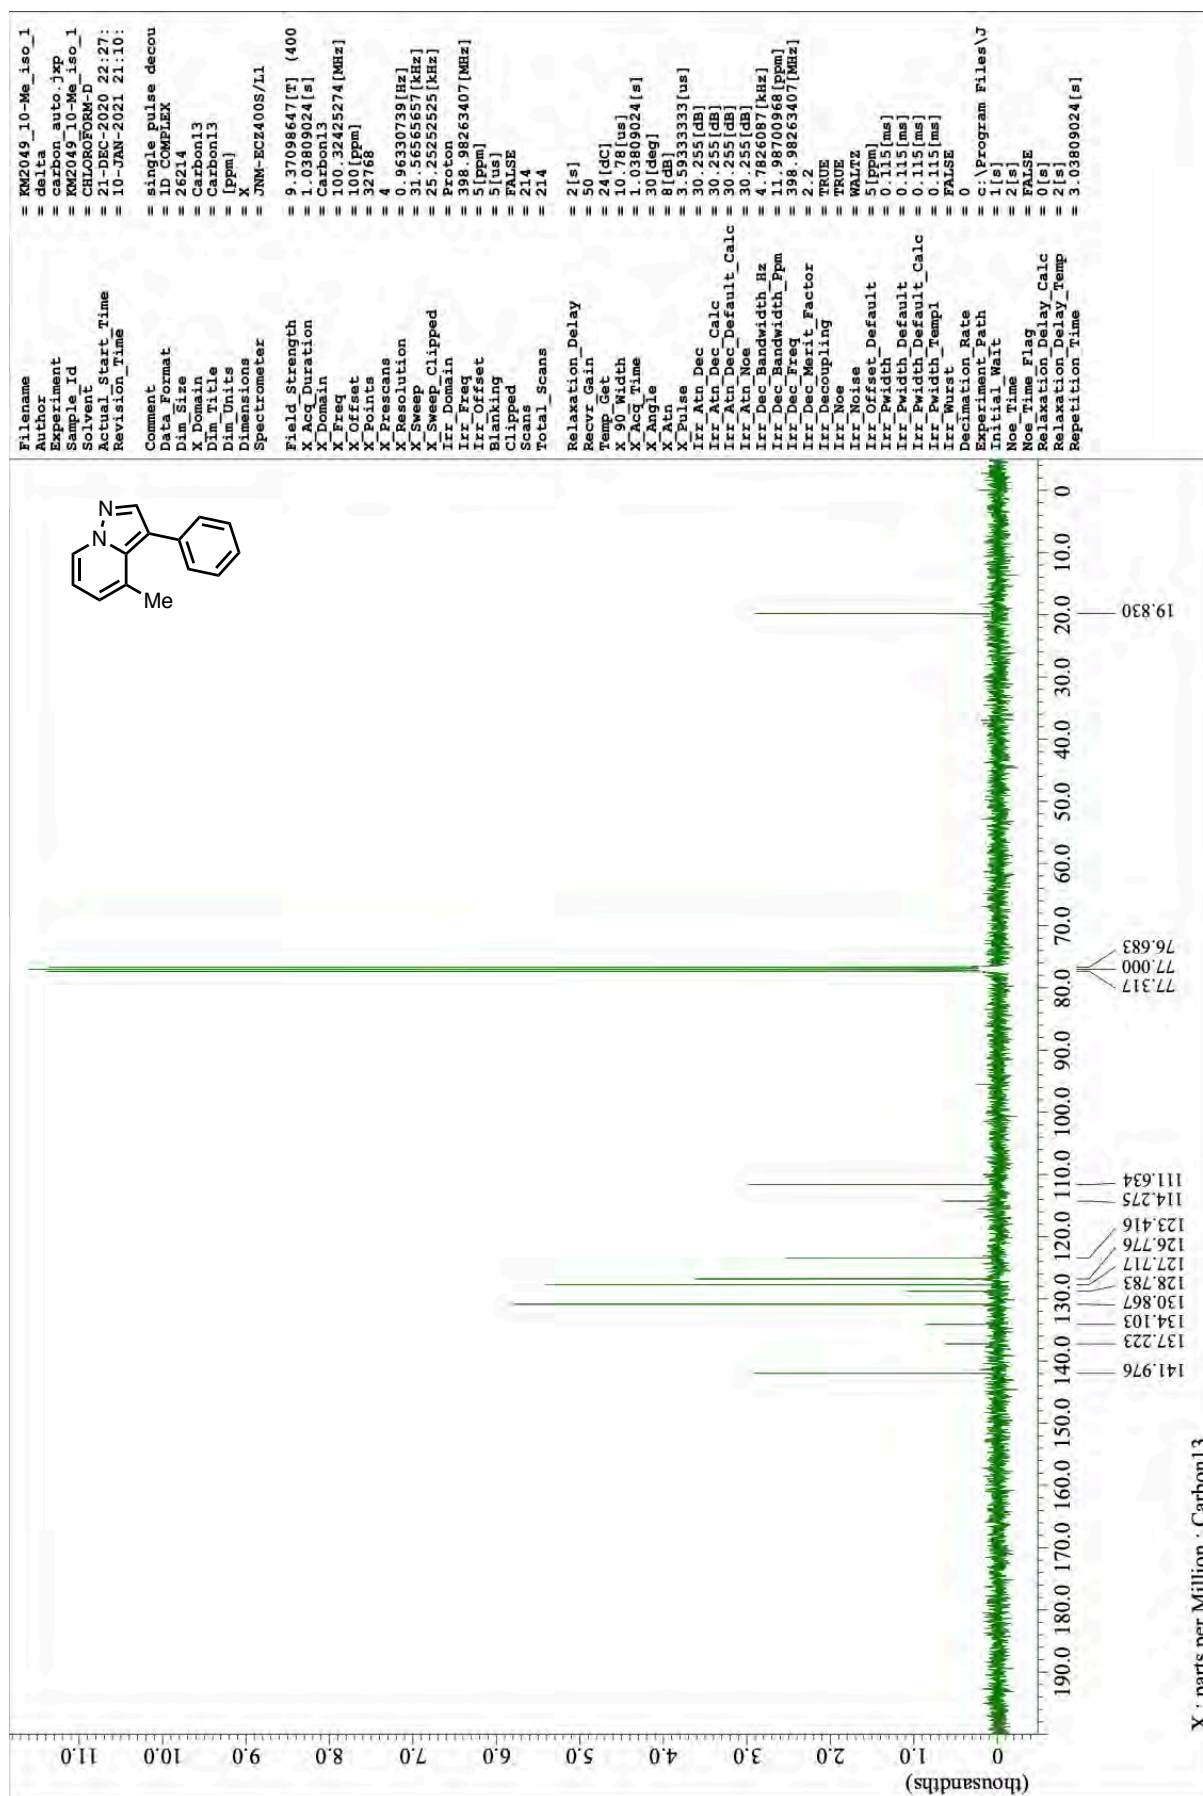

<sup>1</sup>H NMR of 1AE (400 MHz, CDCl<sub>3</sub>)

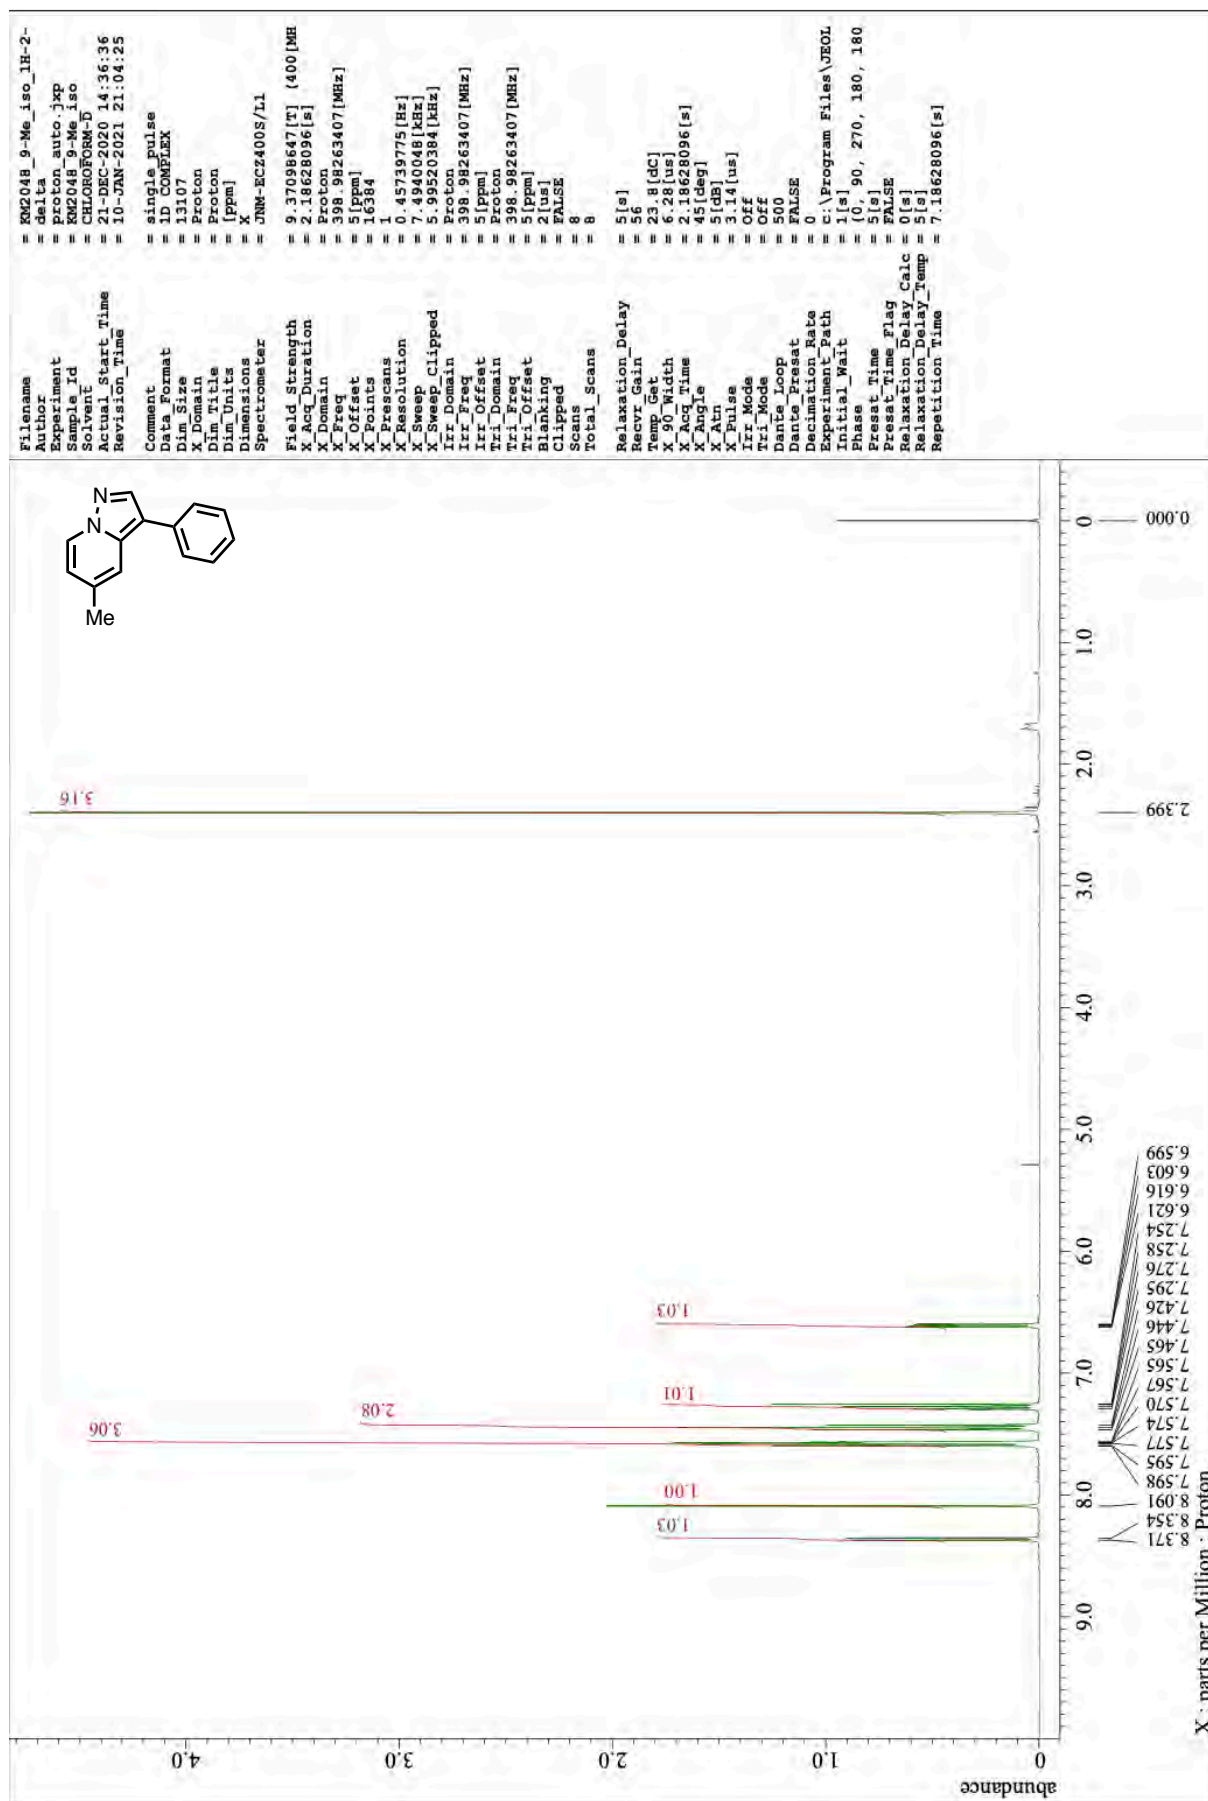

<sup>13</sup>C NMR of 1AE (101 MHz, CDCl<sub>3</sub>)

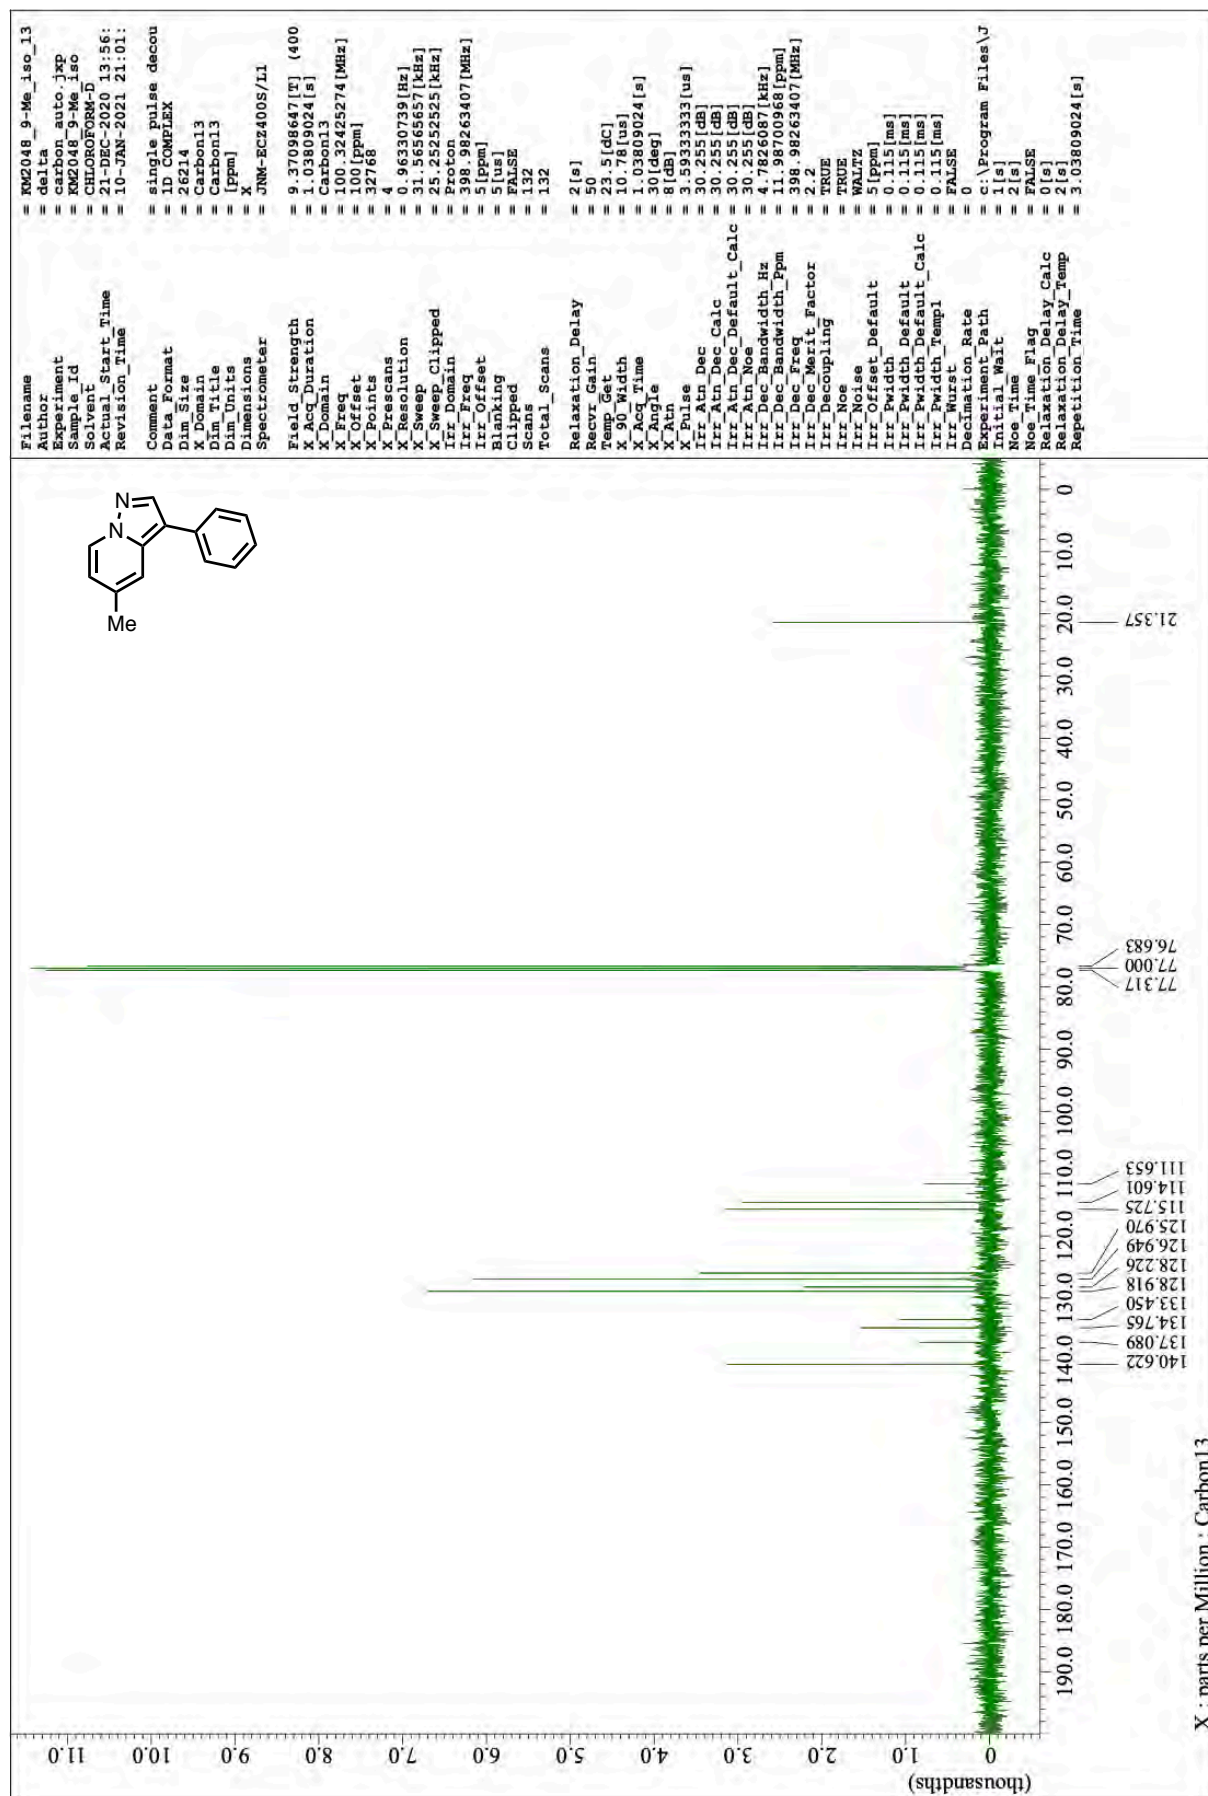

<sup>1</sup>H NMR of 1AF (400 MHz, CDCl<sub>3</sub>)

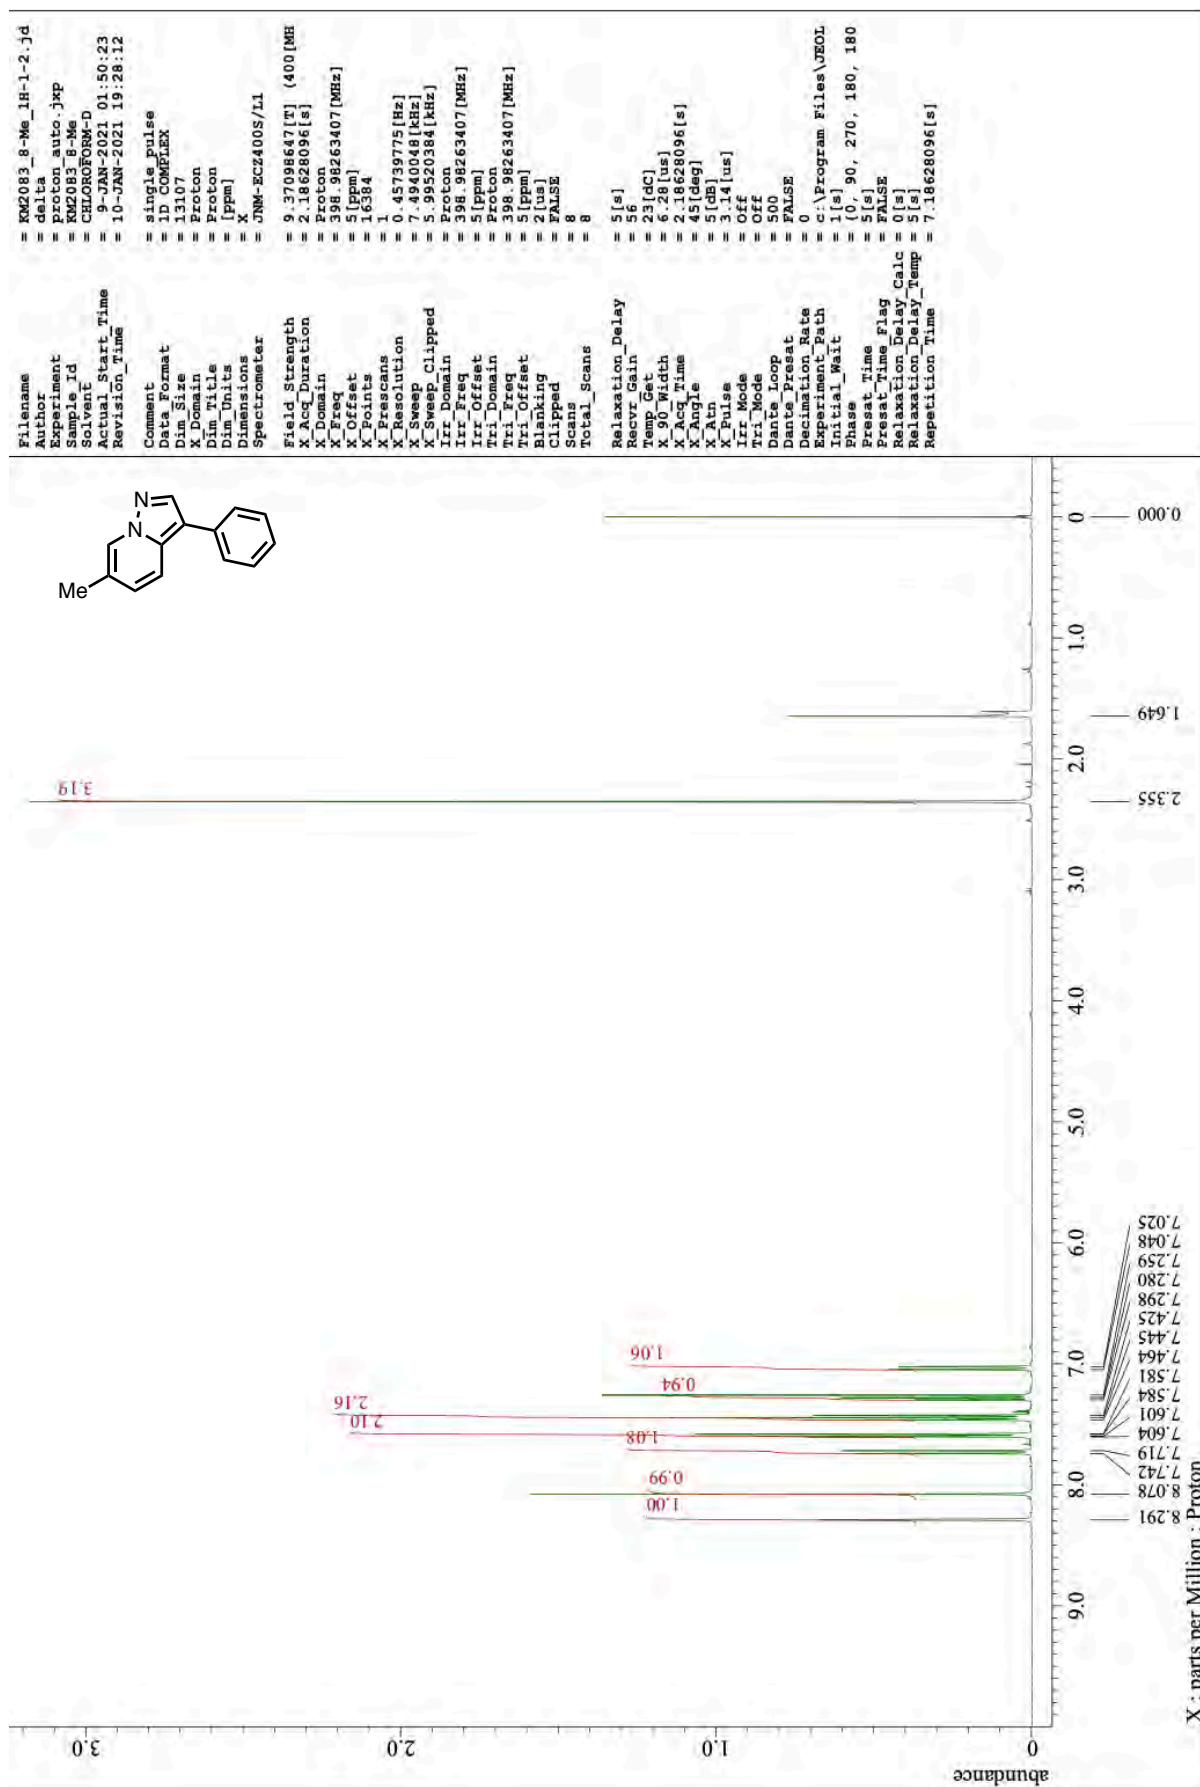

<sup>13</sup>C NMR of 1AF (101 MHz, CDCl<sub>3</sub>)

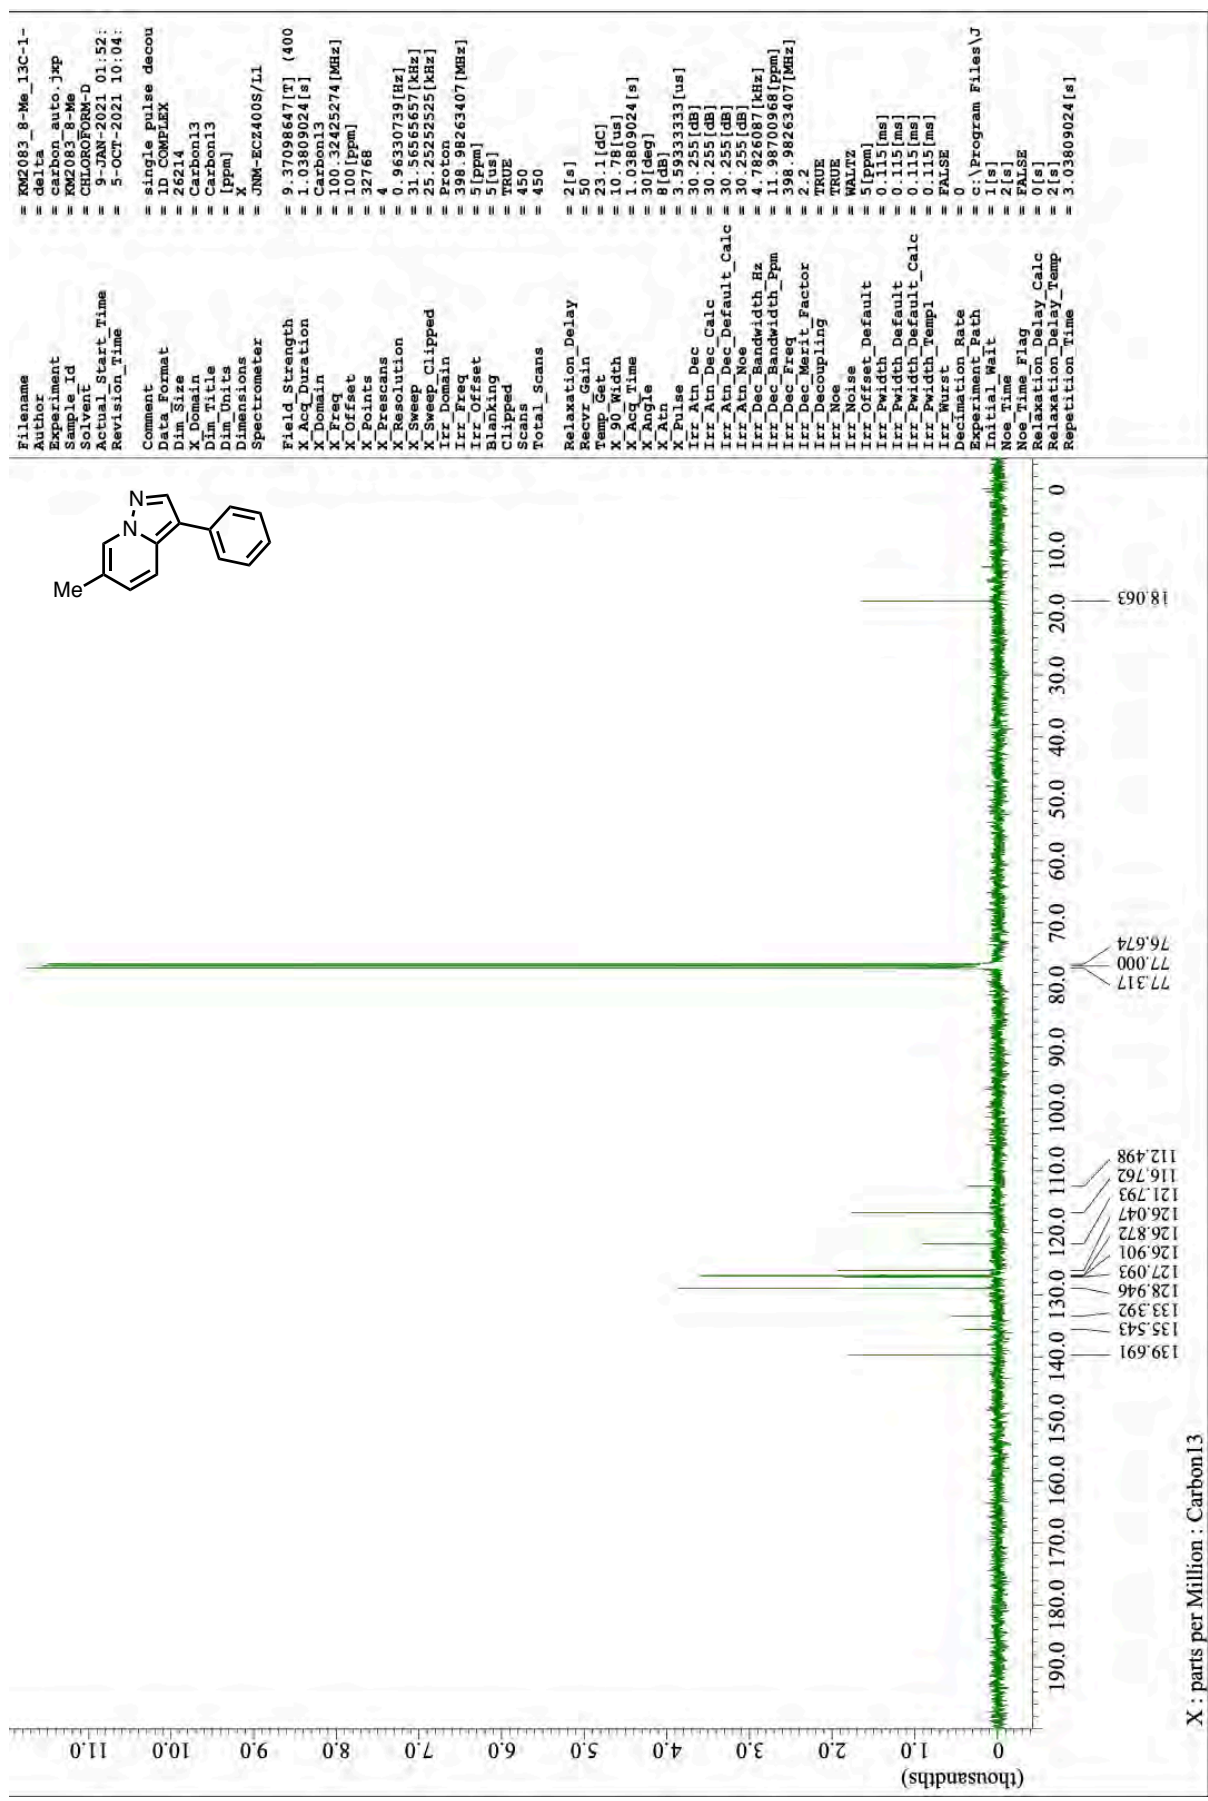

<sup>1</sup>H NMR of 1AH (400 MHz, CDCl<sub>3</sub>)

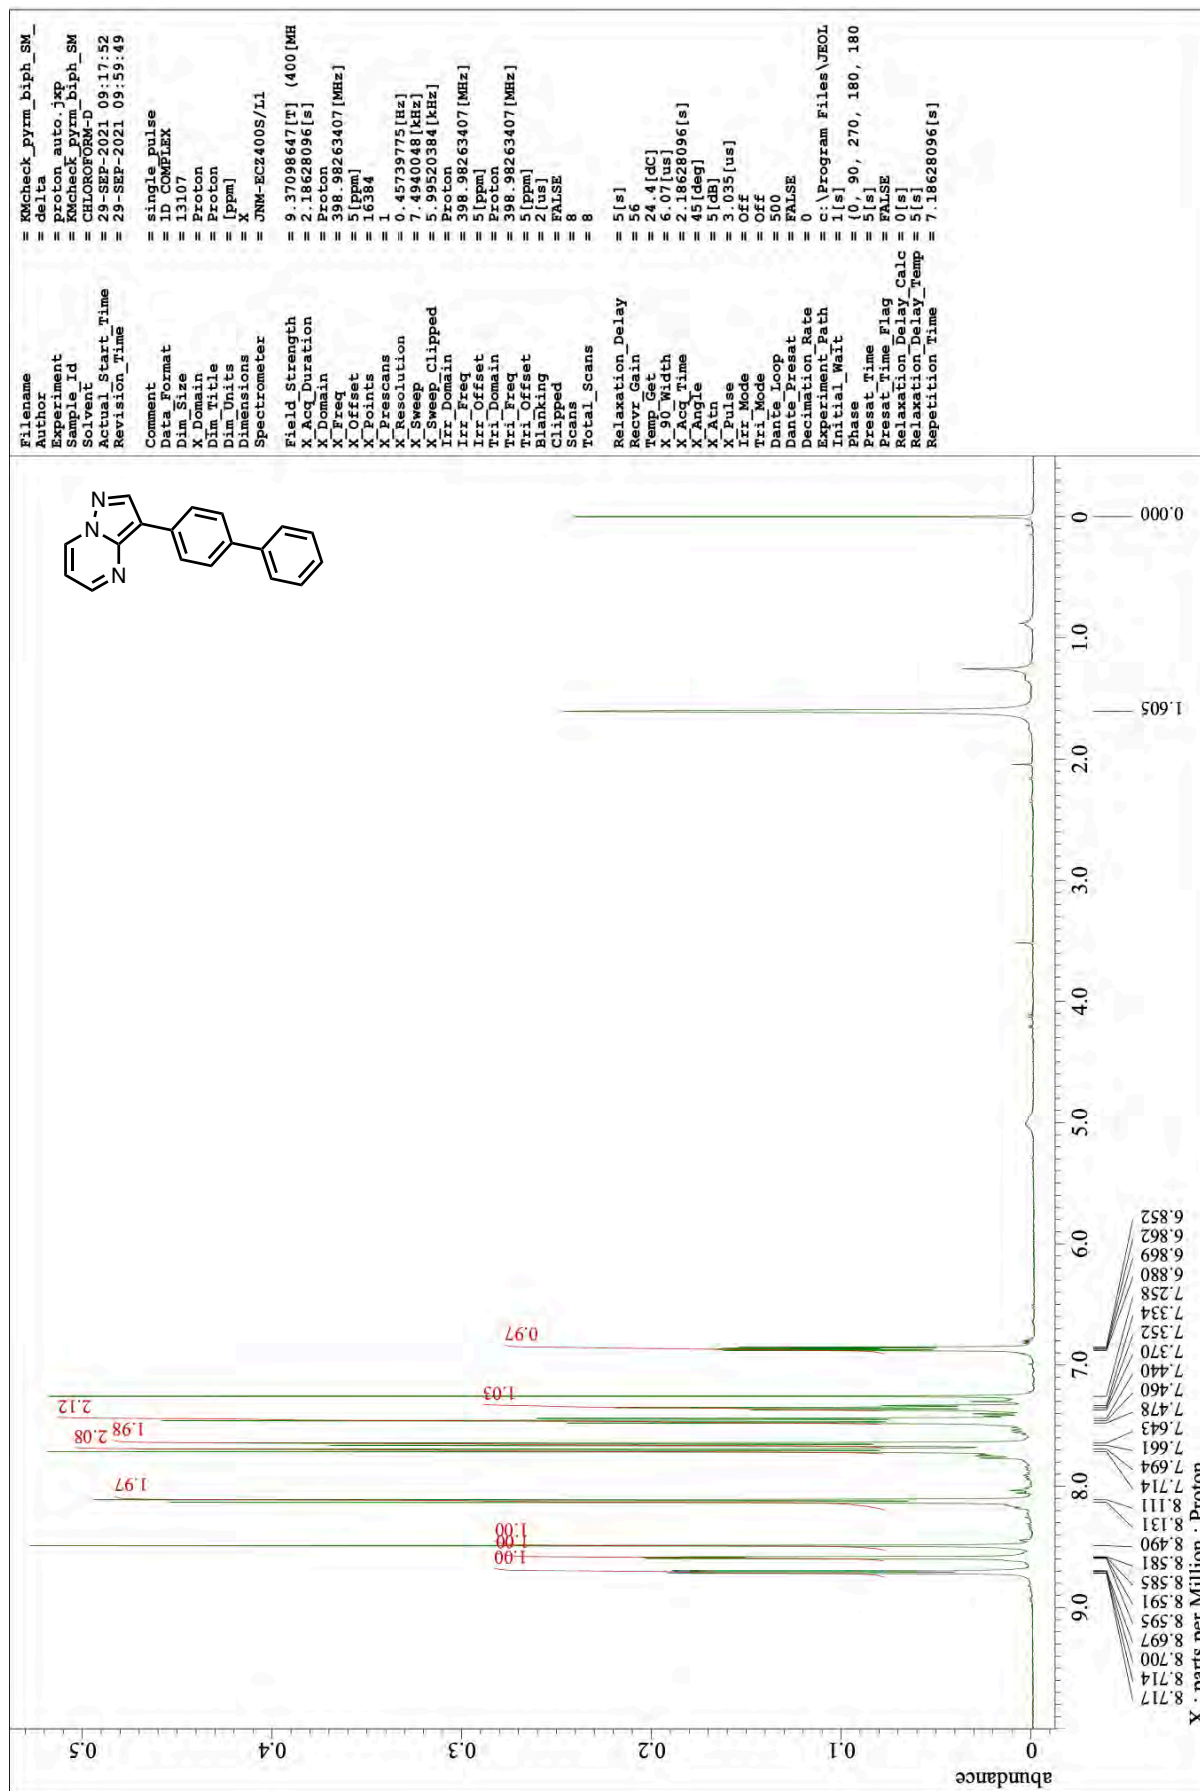



<sup>13</sup>C NMR of 1AH (101 MHz, CDCl<sub>3</sub>)

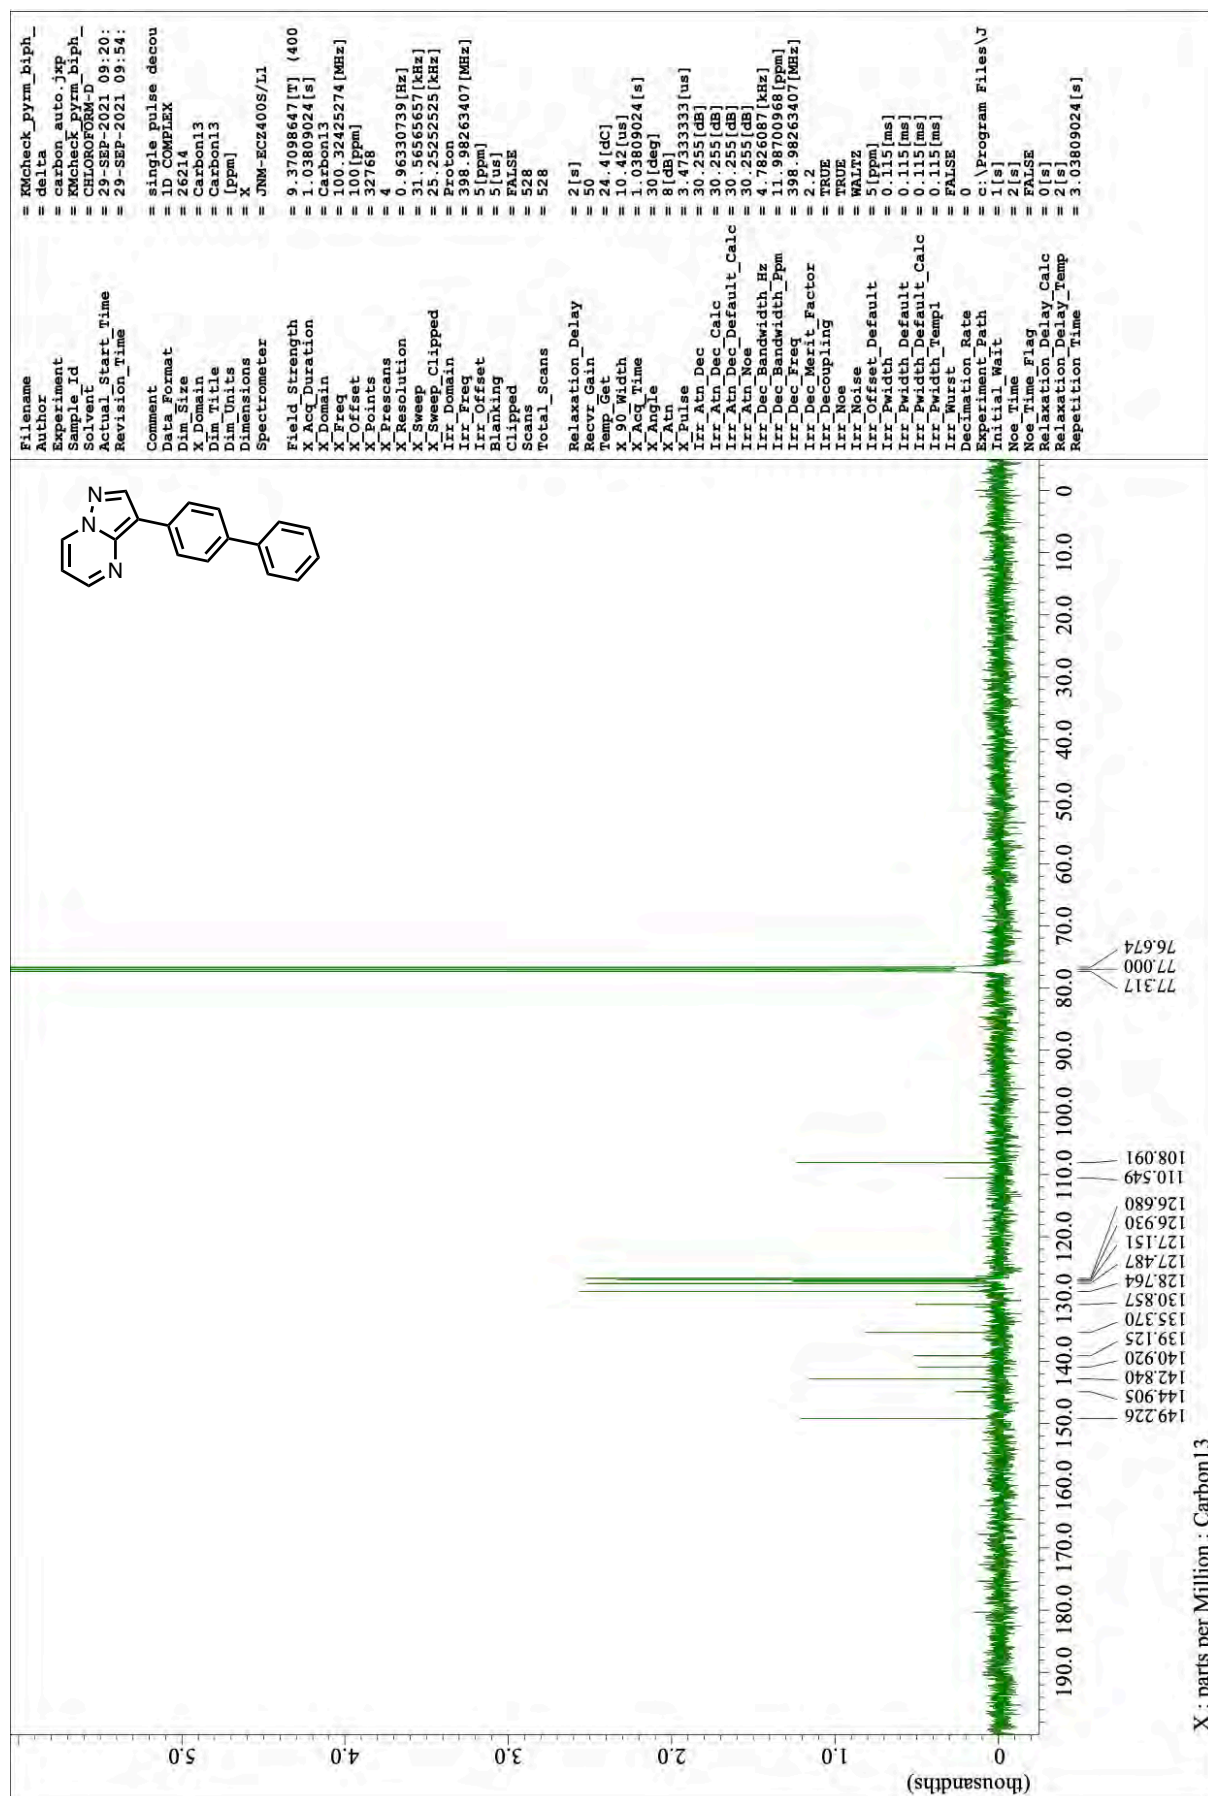

<sup>1</sup>H NMR of 1AI (400 MHz, CDCl<sub>3</sub>)

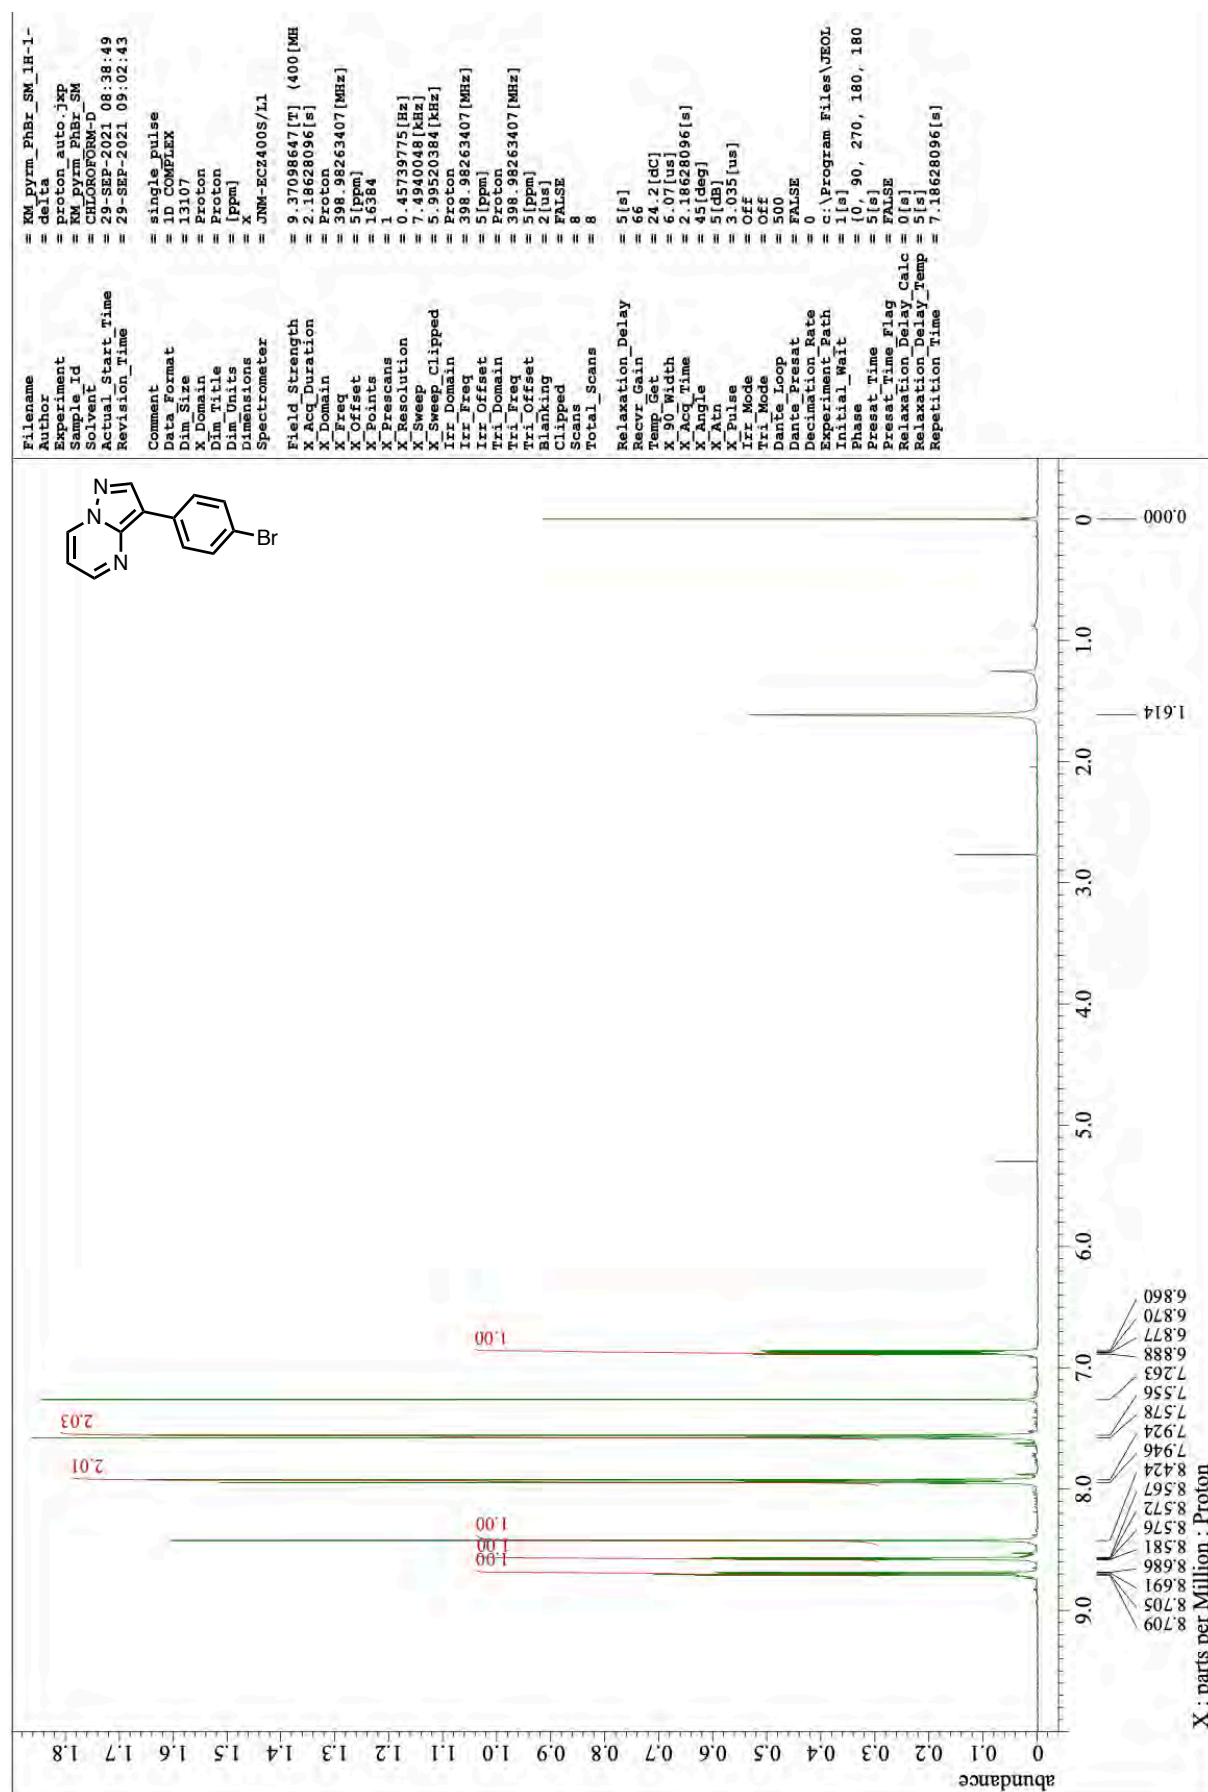

<sup>13</sup>C NMR of 1AI (101 MHz, CDCl<sub>3</sub>)

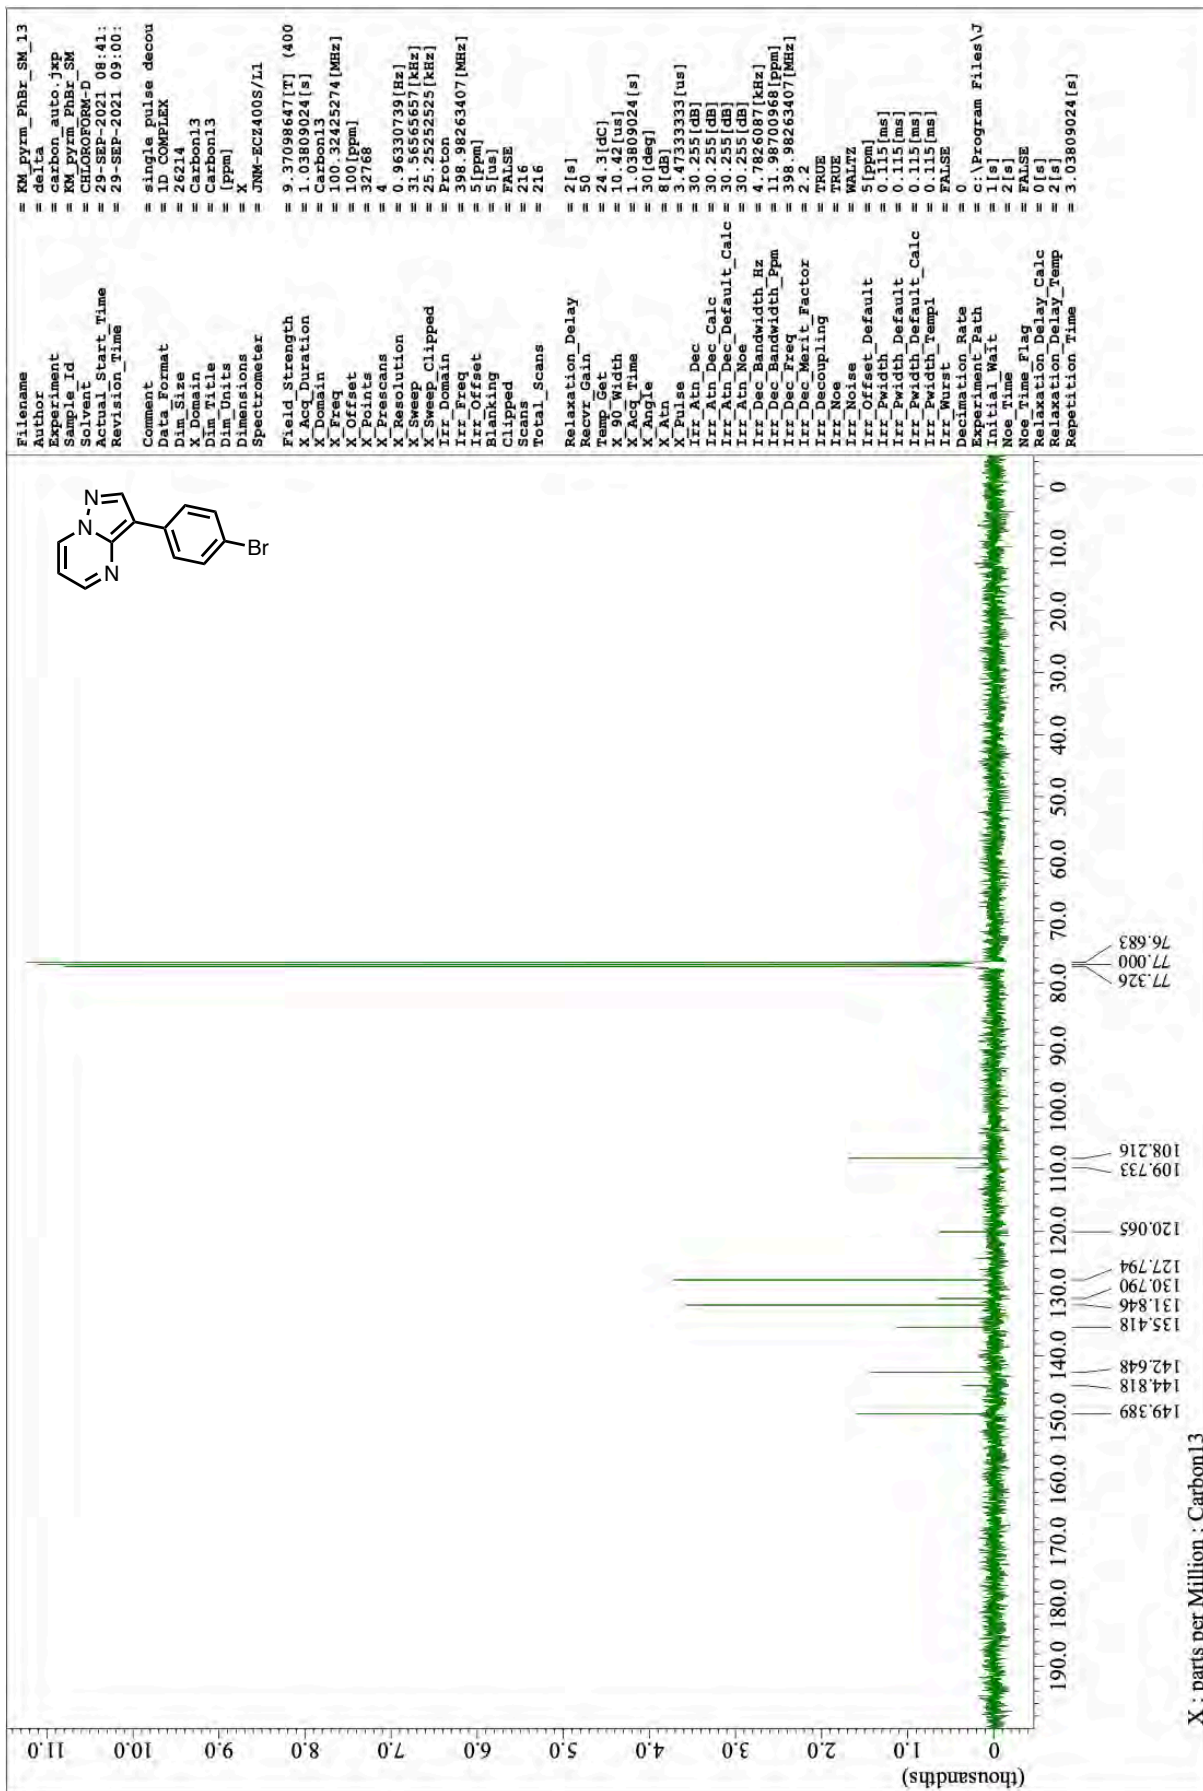

<sup>1</sup>H NMR of 1AJ (400 MHz, CDCl<sub>3</sub>)

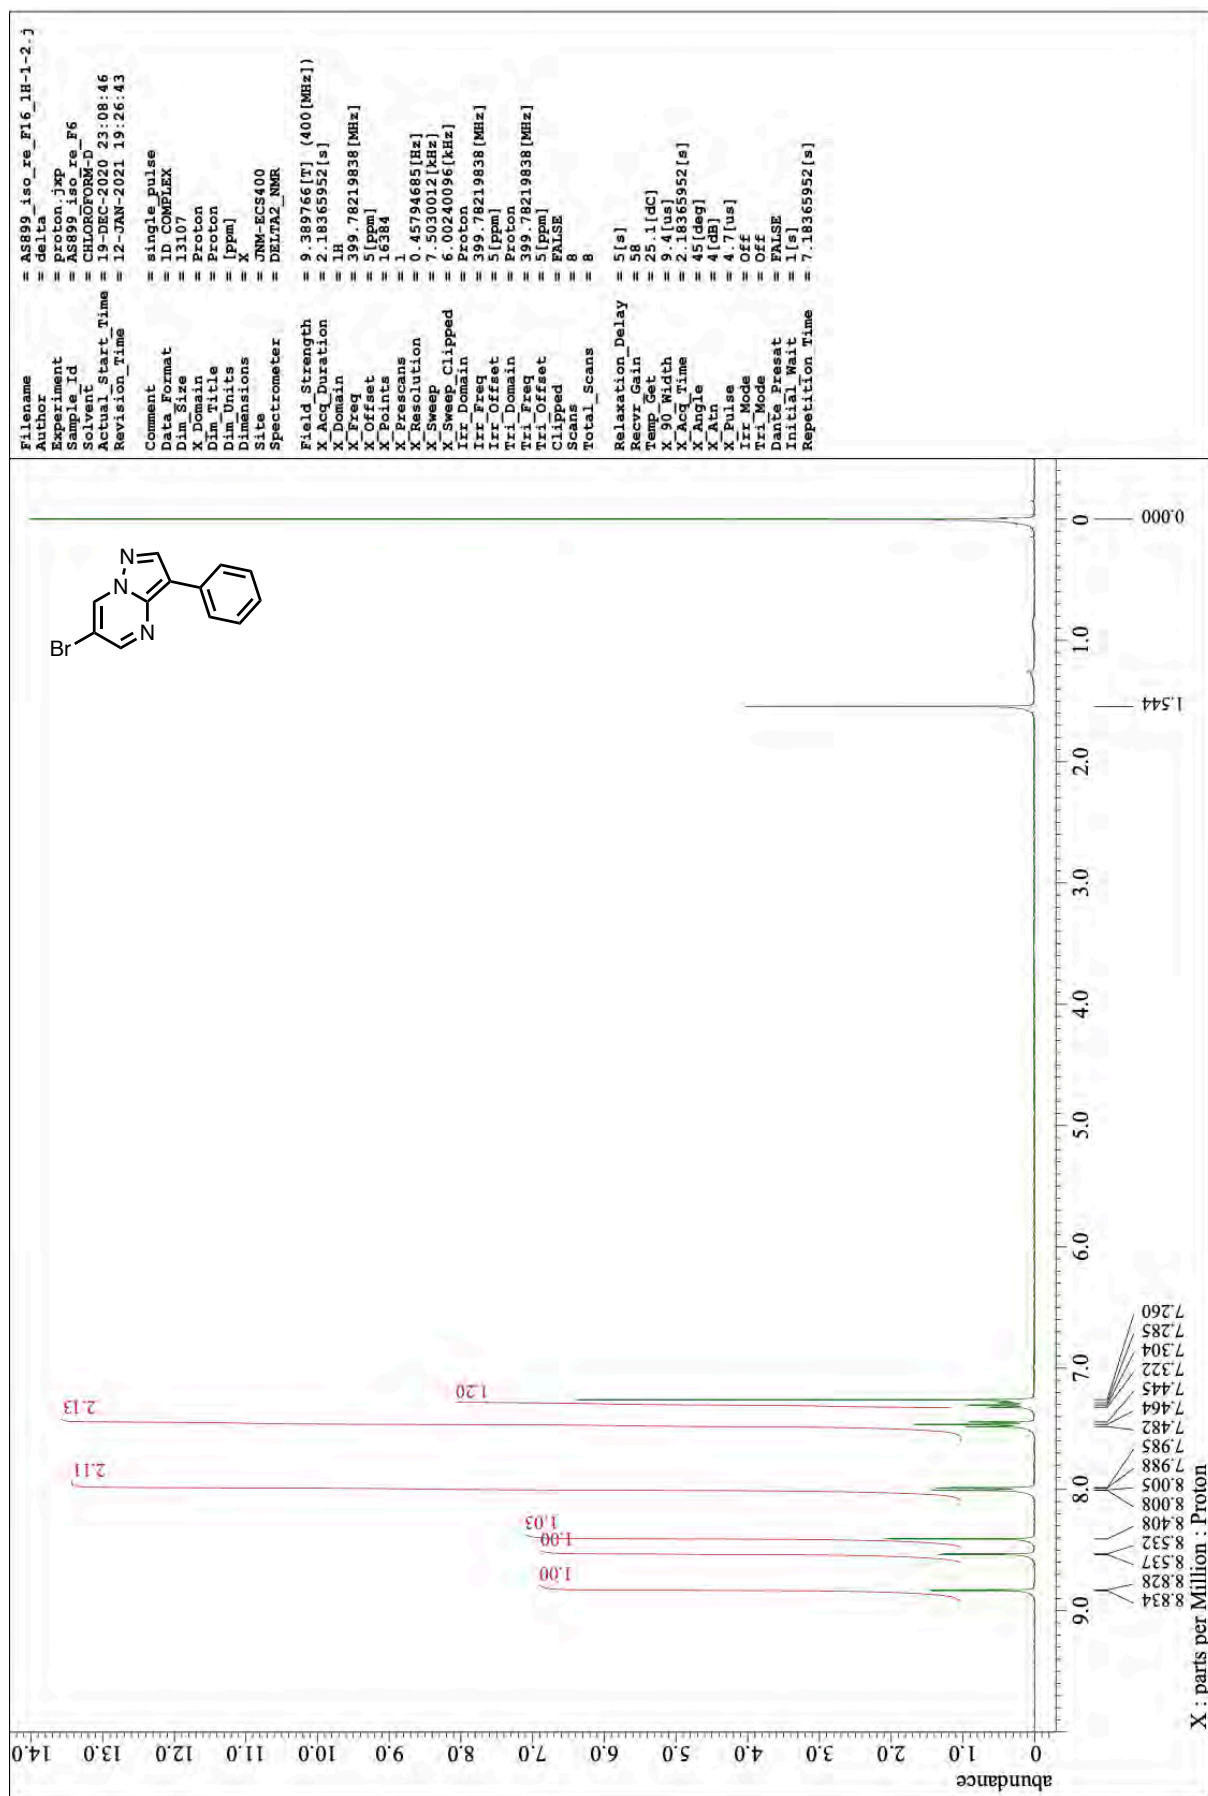

<sup>13</sup>C NMR of 1AJ (101 MHz, CDCl<sub>3</sub>)

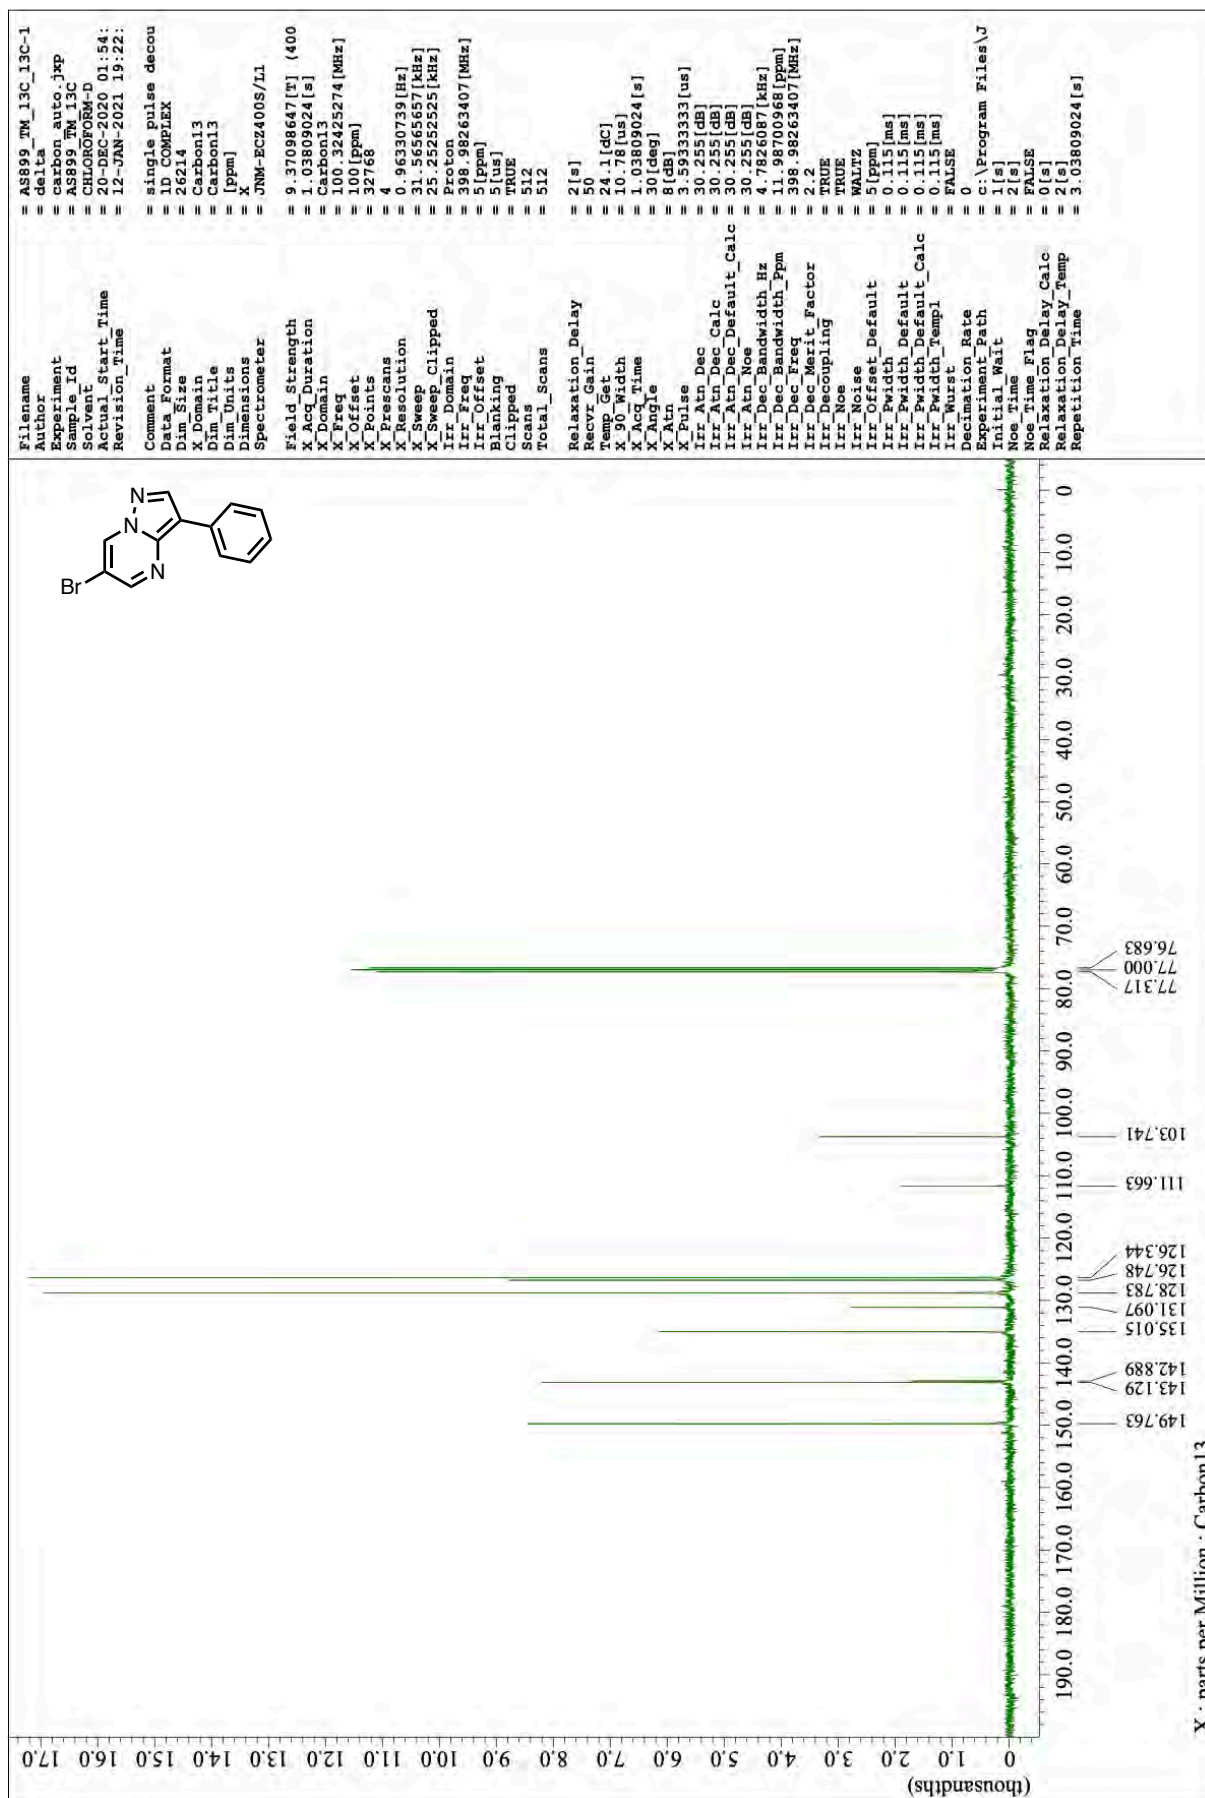

<sup>1</sup>H NMR of 1AK (400 MHz, CDCl<sub>3</sub>)

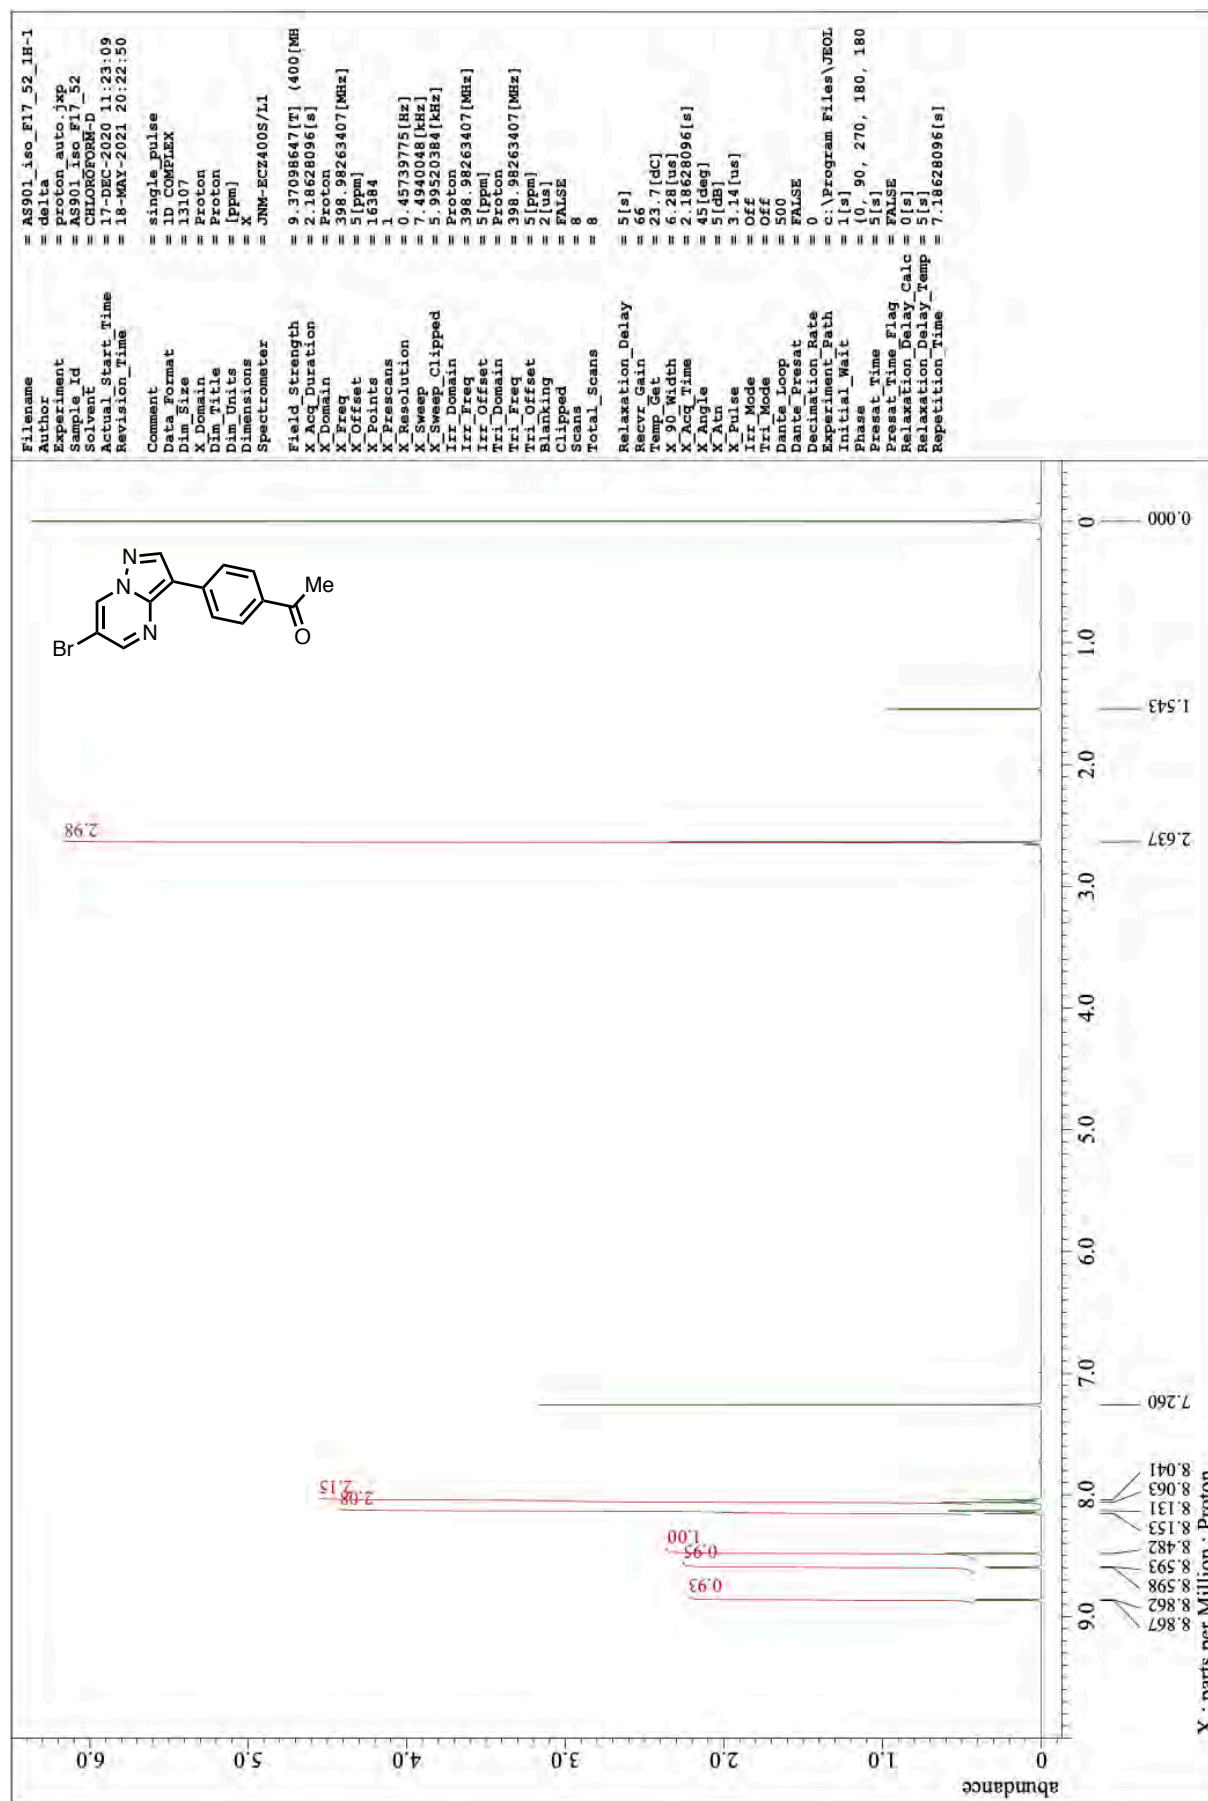

<sup>13</sup>C NMR of 1AK (101 MHz, CDCl<sub>3</sub>)

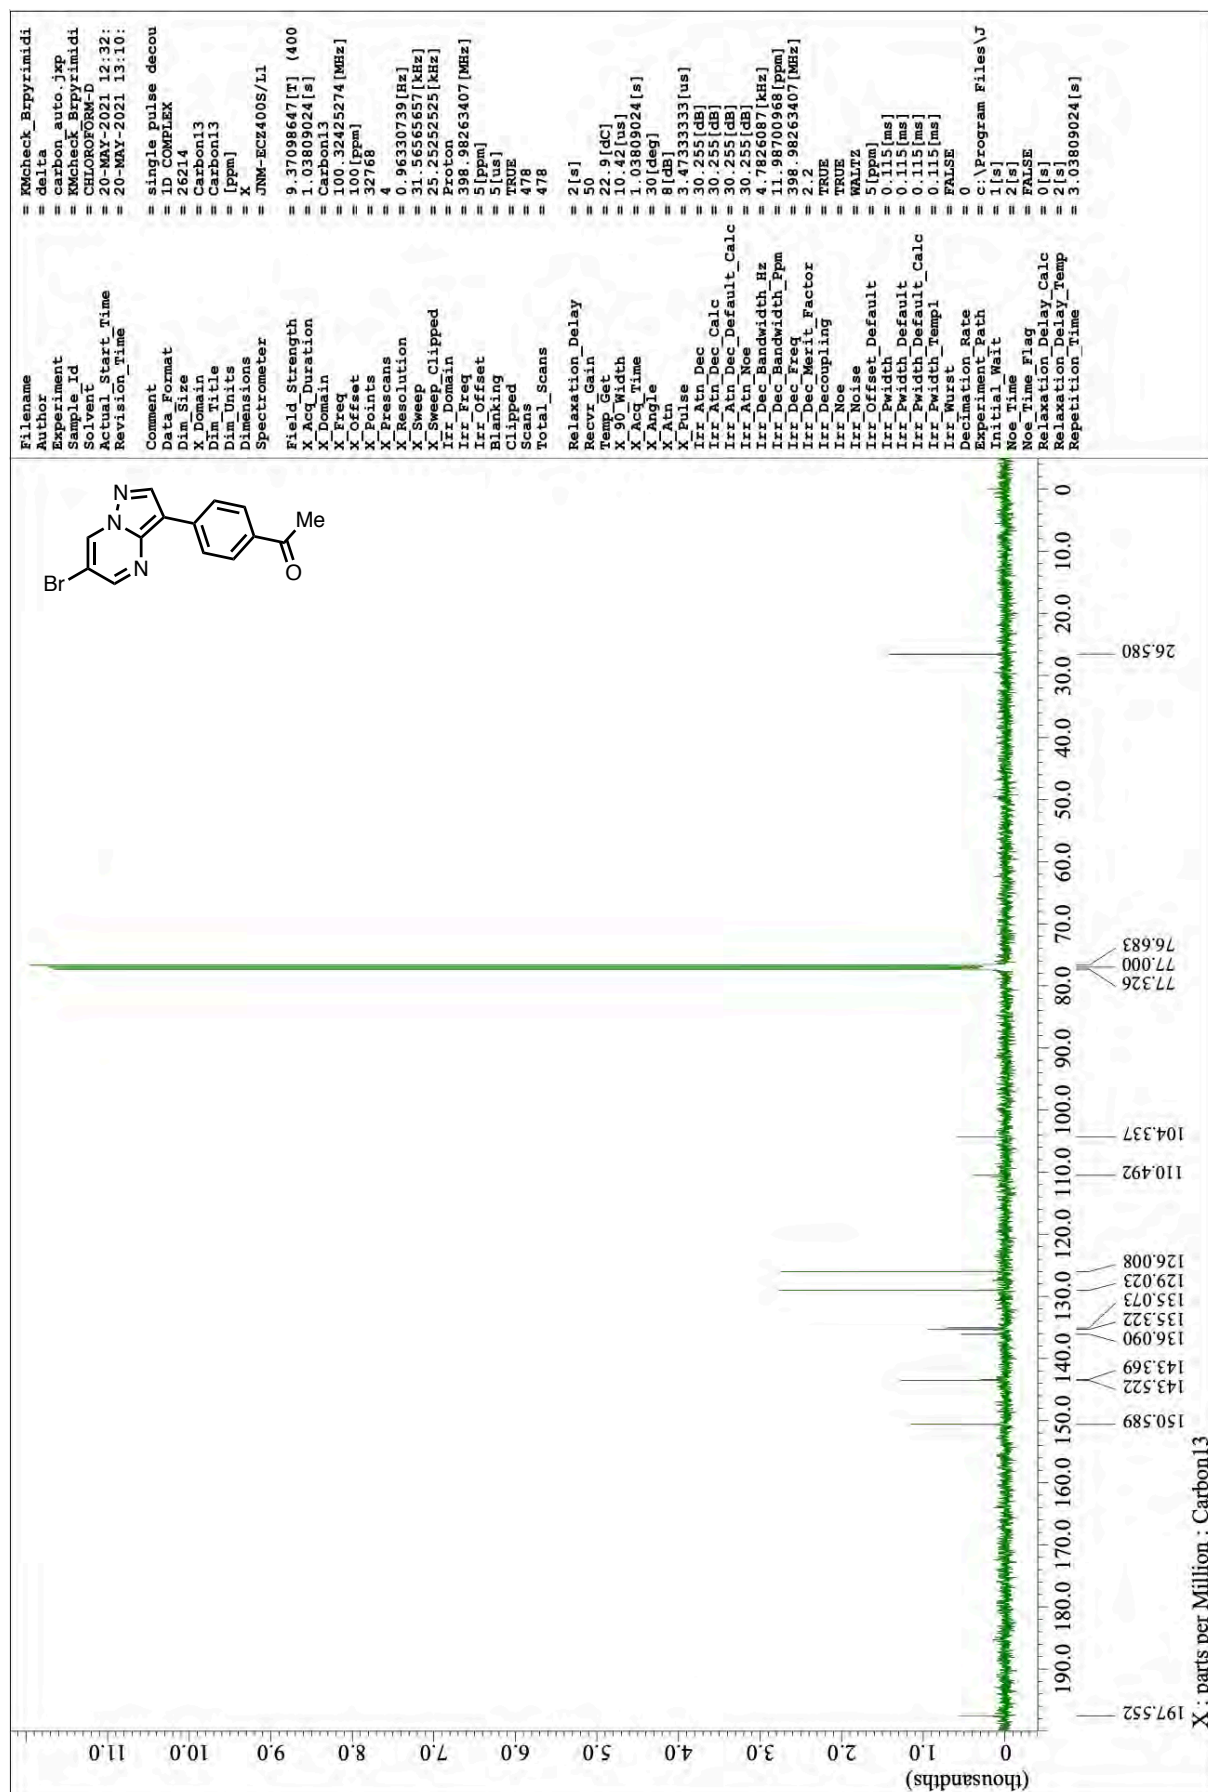

<sup>1</sup>H NMR of 1AL (400 MHz, CDCl<sub>3</sub>)

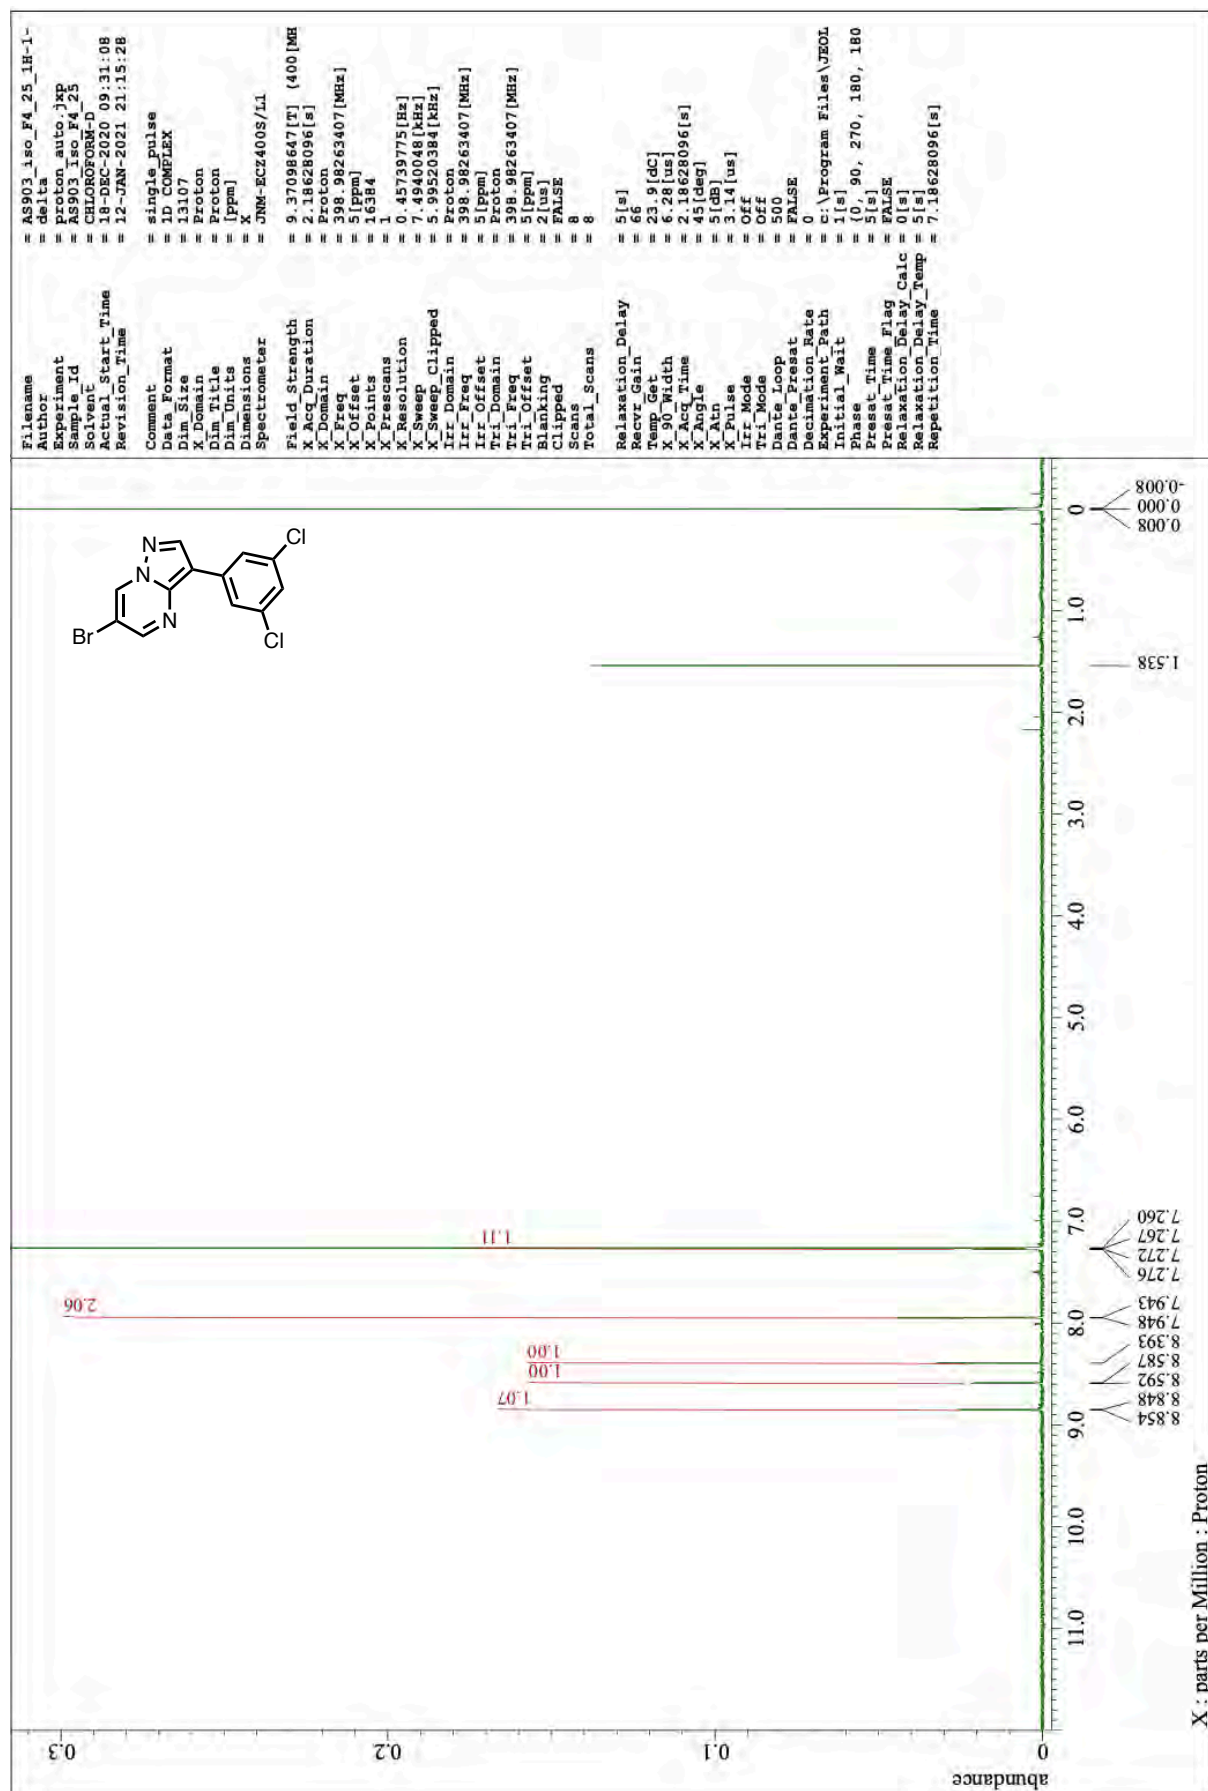



<sup>13</sup>C NMR of 1AL (101 MHz, CDCl<sub>3</sub>)

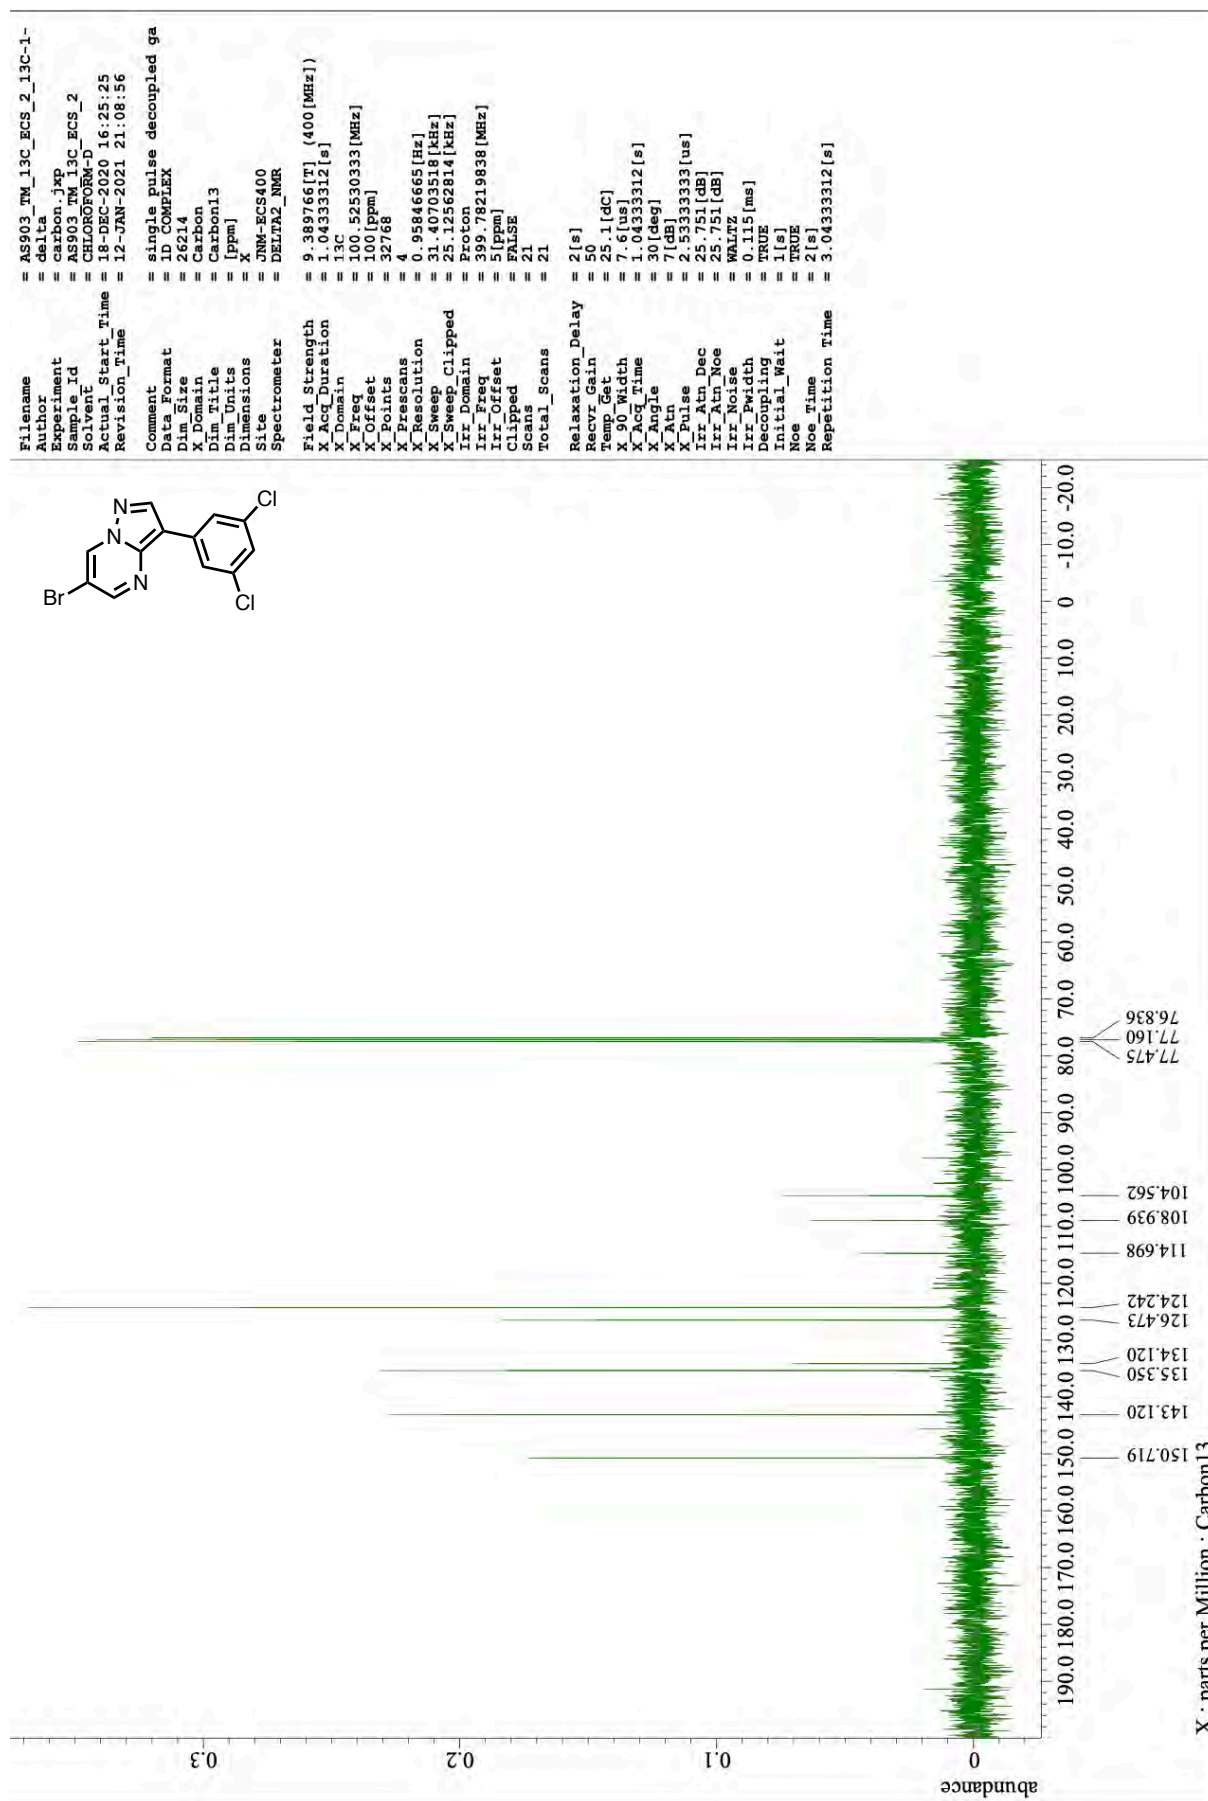

<sup>1</sup>H NMR of 1AN (400 MHz, CDCl<sub>3</sub>)

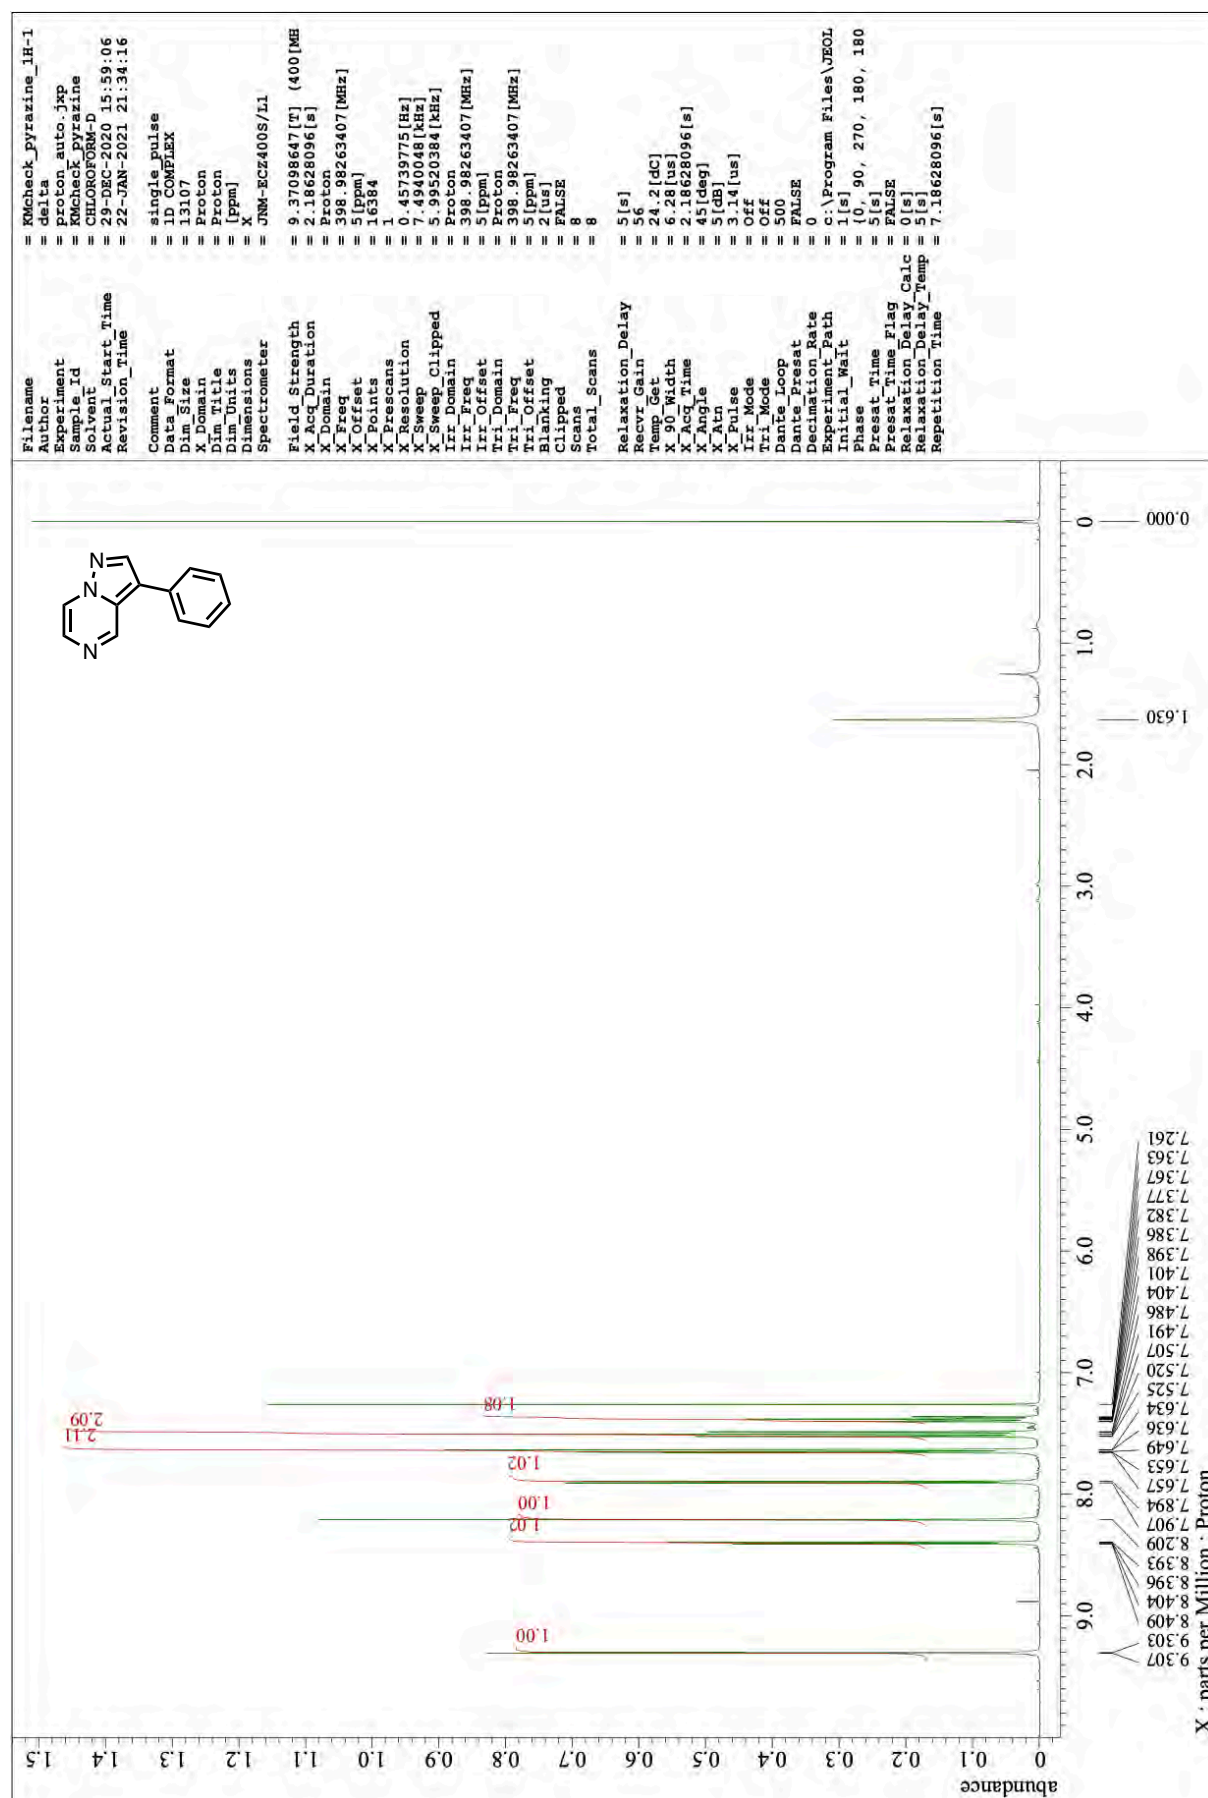

<sup>13</sup>C NMR of IAN (101 MHz, CDCl<sub>3</sub>)

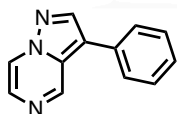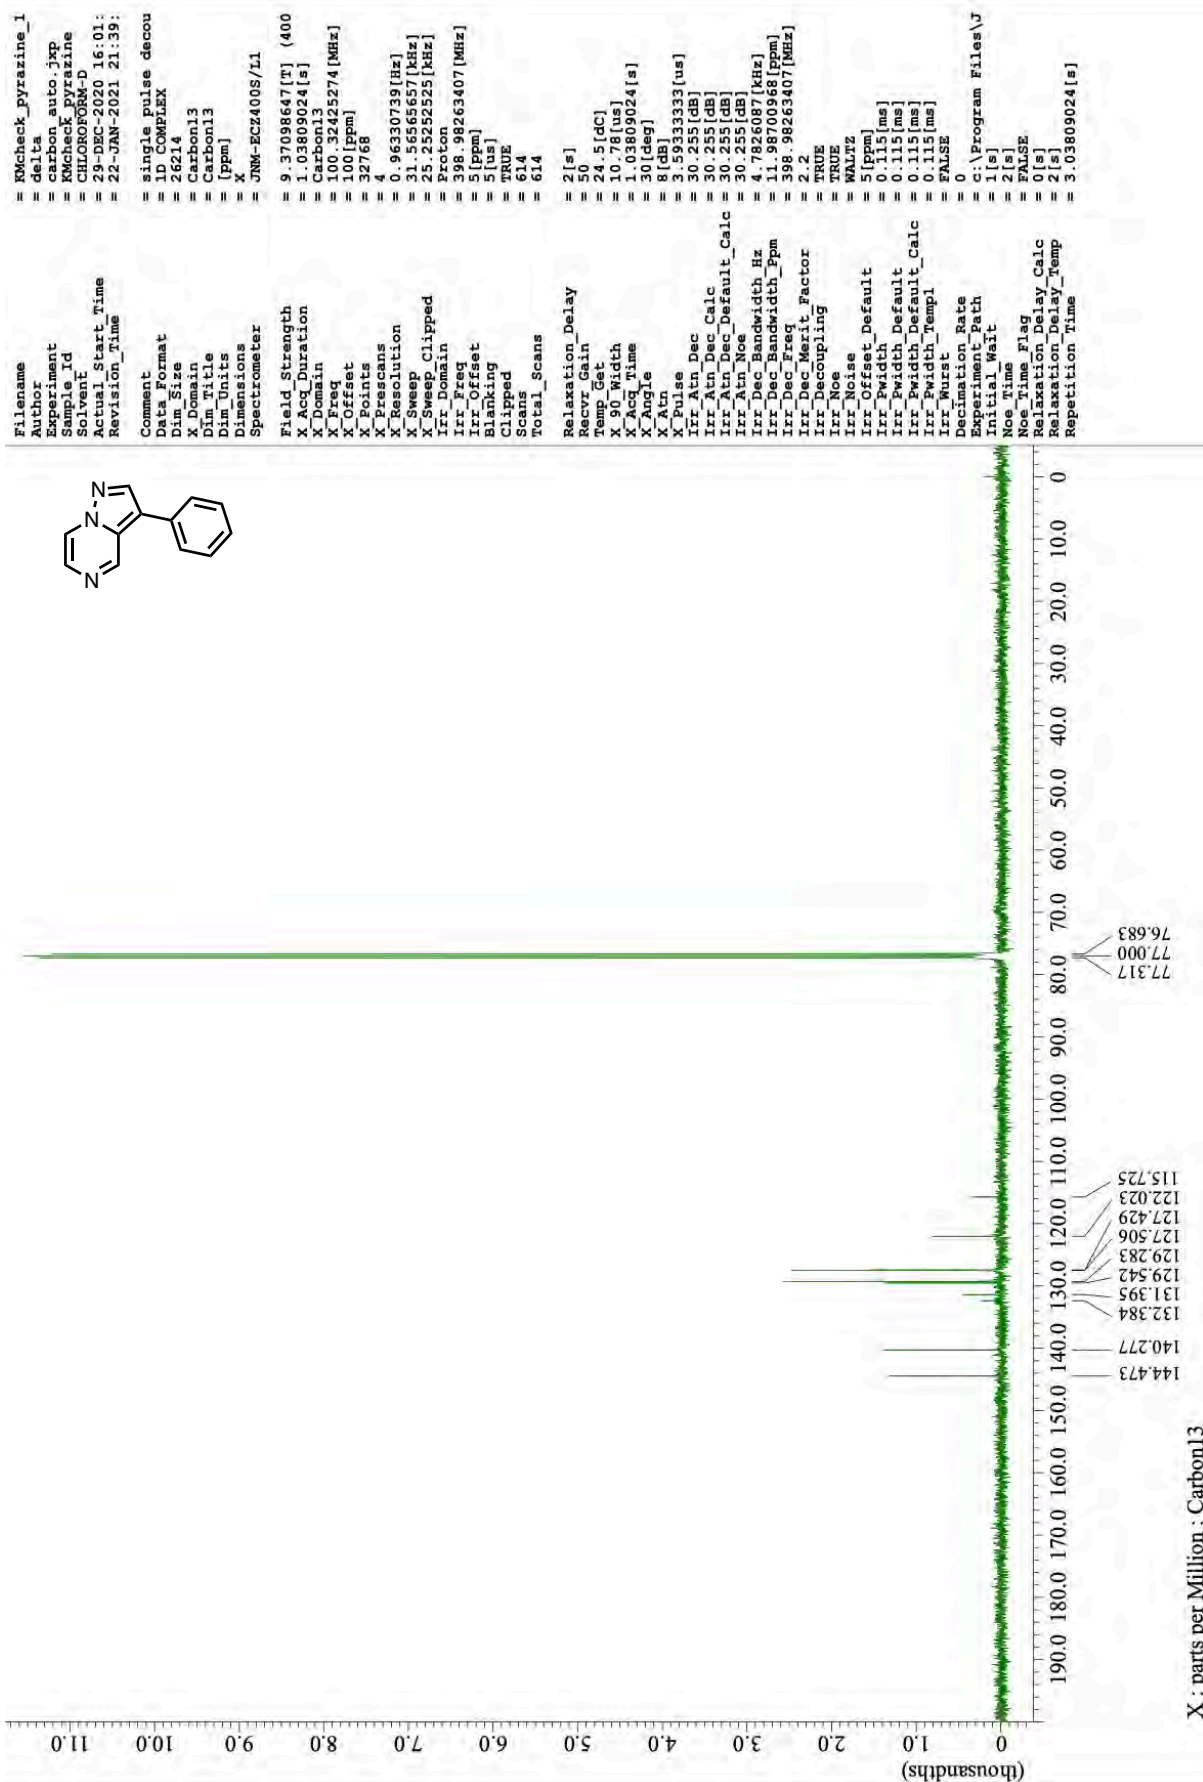

X : parts per Million : Carbon13

```

= KMcheck_pyrazine_1
= delta
= kben auto_jpp
= KMcheck_pyrazine
= CHLOROFORM-D
= 29-DEC-2020 16:01:
= 22-JAN-2021 21:39:
= single pulse decou
= 1D COMPLEX
= 26214
= Carbon13
= Carbon13
= [ppm]
= X
= JNM-ECZ400S/L1
= 9.37098647[T] (400
= 1.03809024[s]
= Carbon13
= 100.32425274 [MHz]
= 100 [ppm]
= 32768
= 4
= 0.96330739[Hz]
= 31.56565657[kHz]
= 25.25252525 [kHz]
= Proton
= 398.98263407 [MHz]
= 5 [ppm]
= 5 [us]
= TRUE
= 614
= 2 [s]
= 50
= 24.5 [dc]
= 10.78 [us]
= 1.03809024 [s]
= 30 [deg]
= 8 [dB]
= 3.59333333 [us]
= 30.255 [dB]
= 30.255 [dB]
= 30.255 [dB]
= 30.255 [dB]
= 4.7826087 [kHz]
= 11.98700968 [ppm]
= 398.98263407 [MHz]
= 2.2
= TRUE
= TRUE
= WALTZ
= 5 [ppm]
= 0.115 [ms]
= 0.115 [ms]
= 0.115 [ms]
= 0.115 [ms]
= FALSE
= 0
= c:\Program Files\J
= 1 [s]
= FALSE
= 0 [s]
= 2 [s]
= 3.03809024 [s]

```

<sup>1</sup>H NMR of 1AO (400 MHz, CDCl<sub>3</sub>)

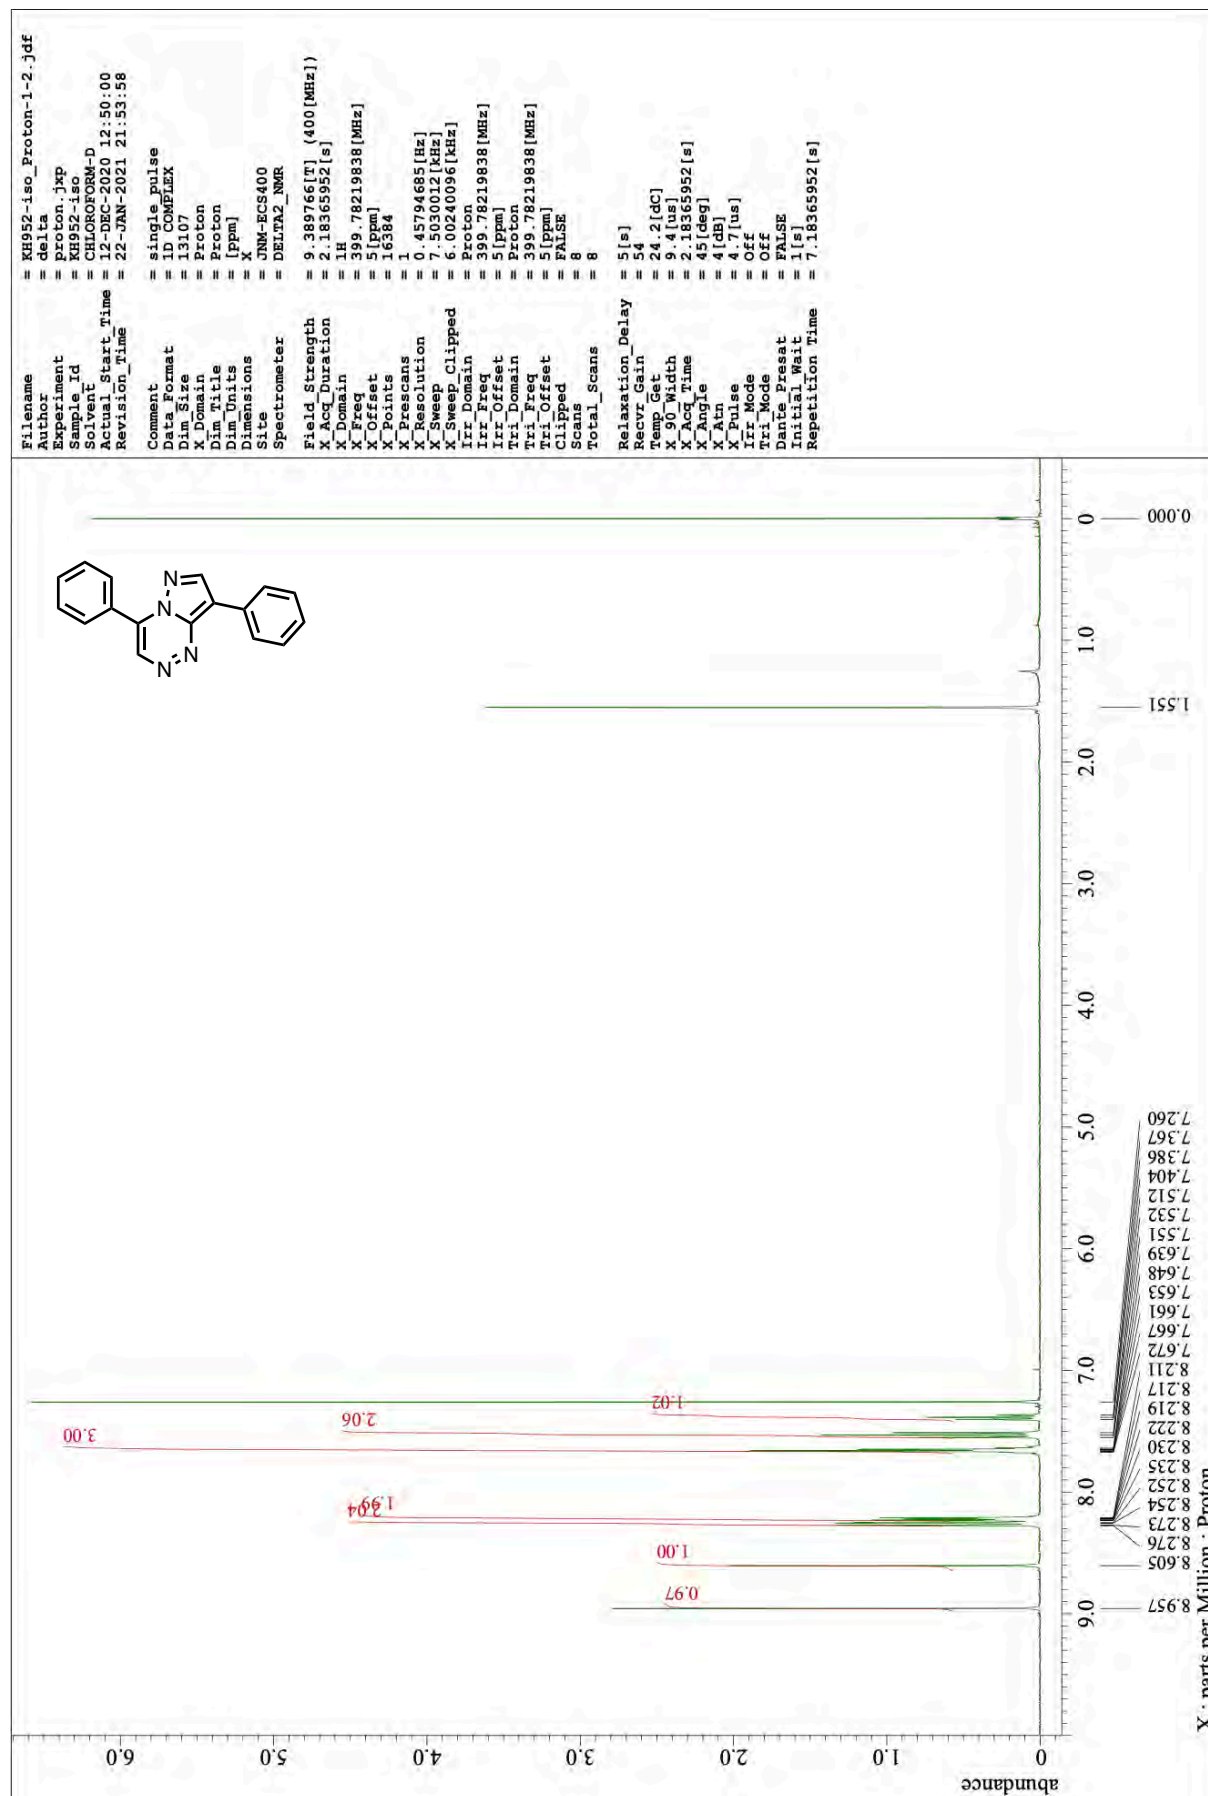

<sup>13</sup>C NMR of 1AO (101 MHz, CDCl<sub>3</sub>)

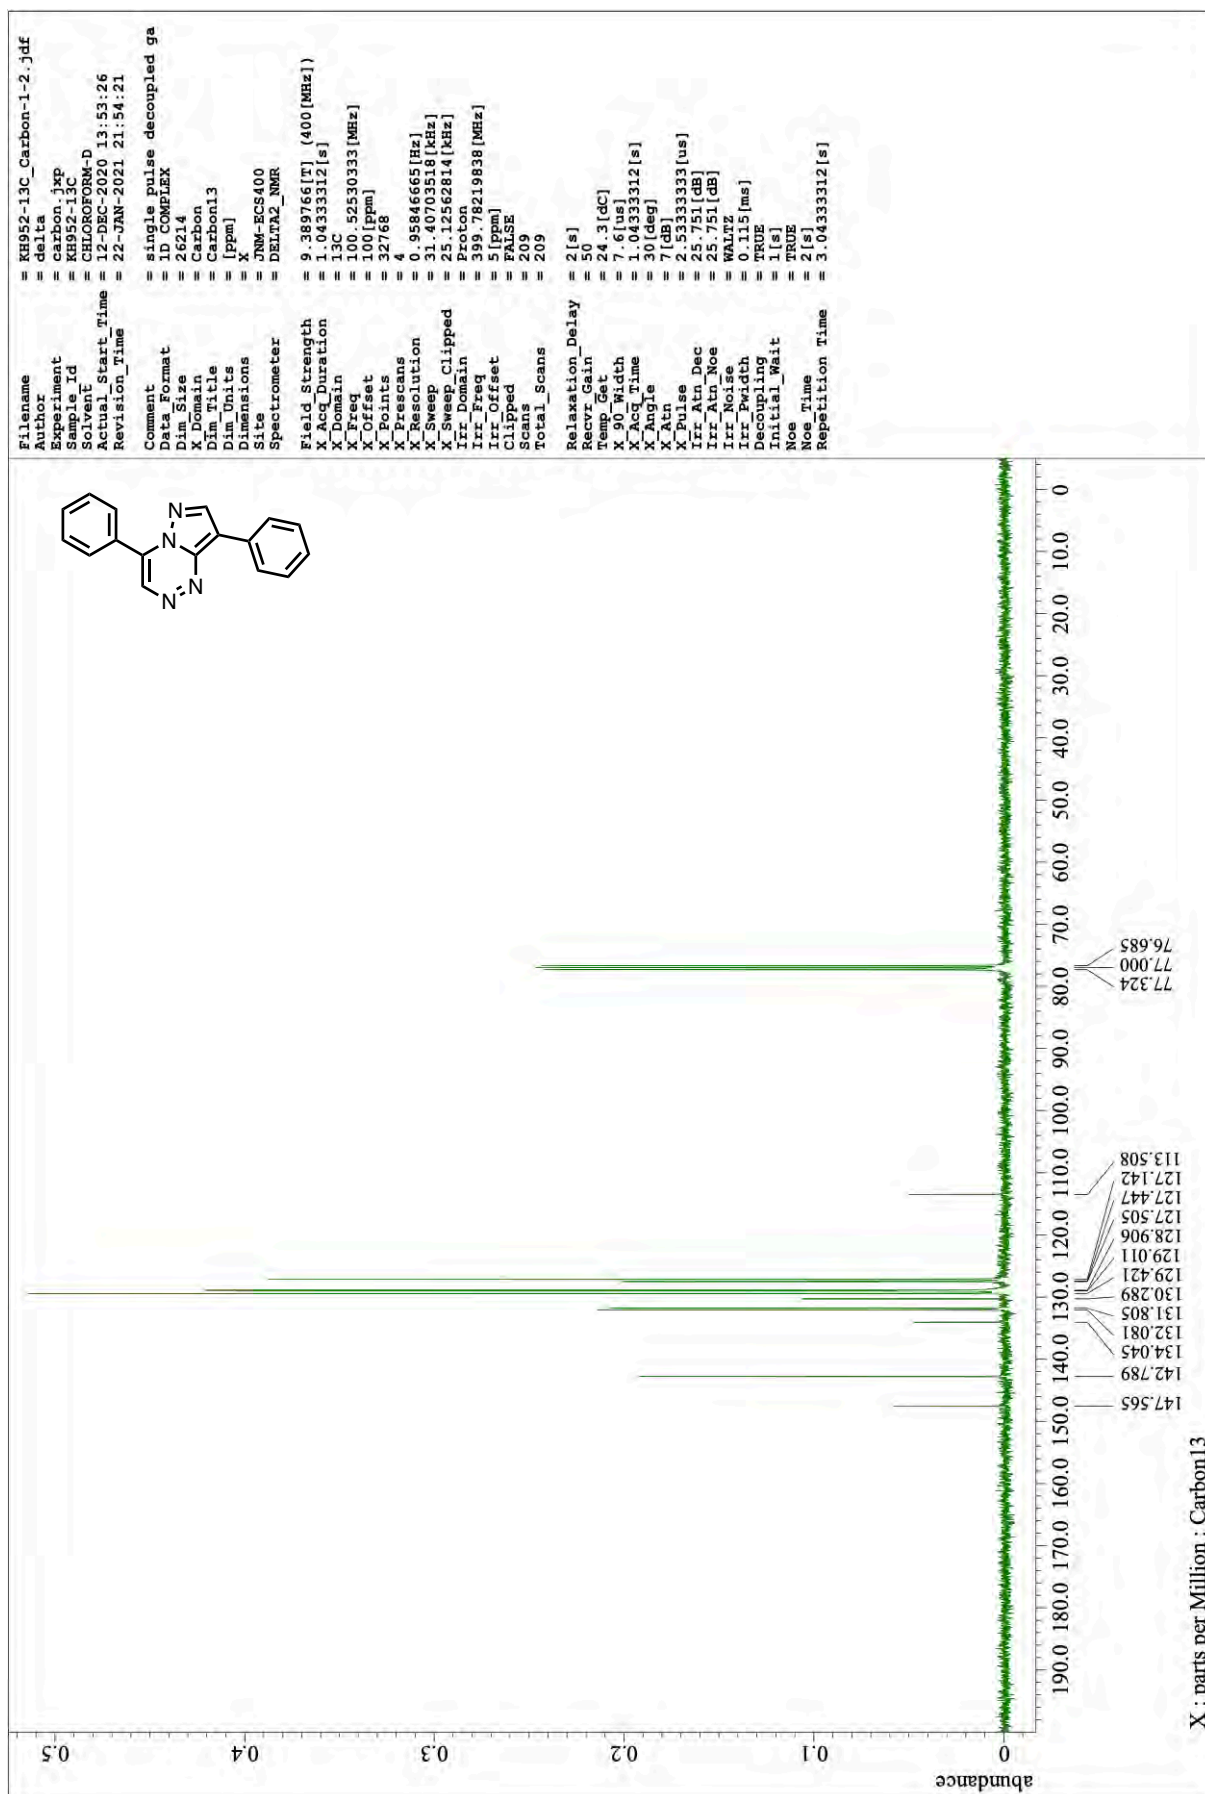

<sup>1</sup>H NMR of 1AP (400 MHz, CDCl<sub>3</sub>)

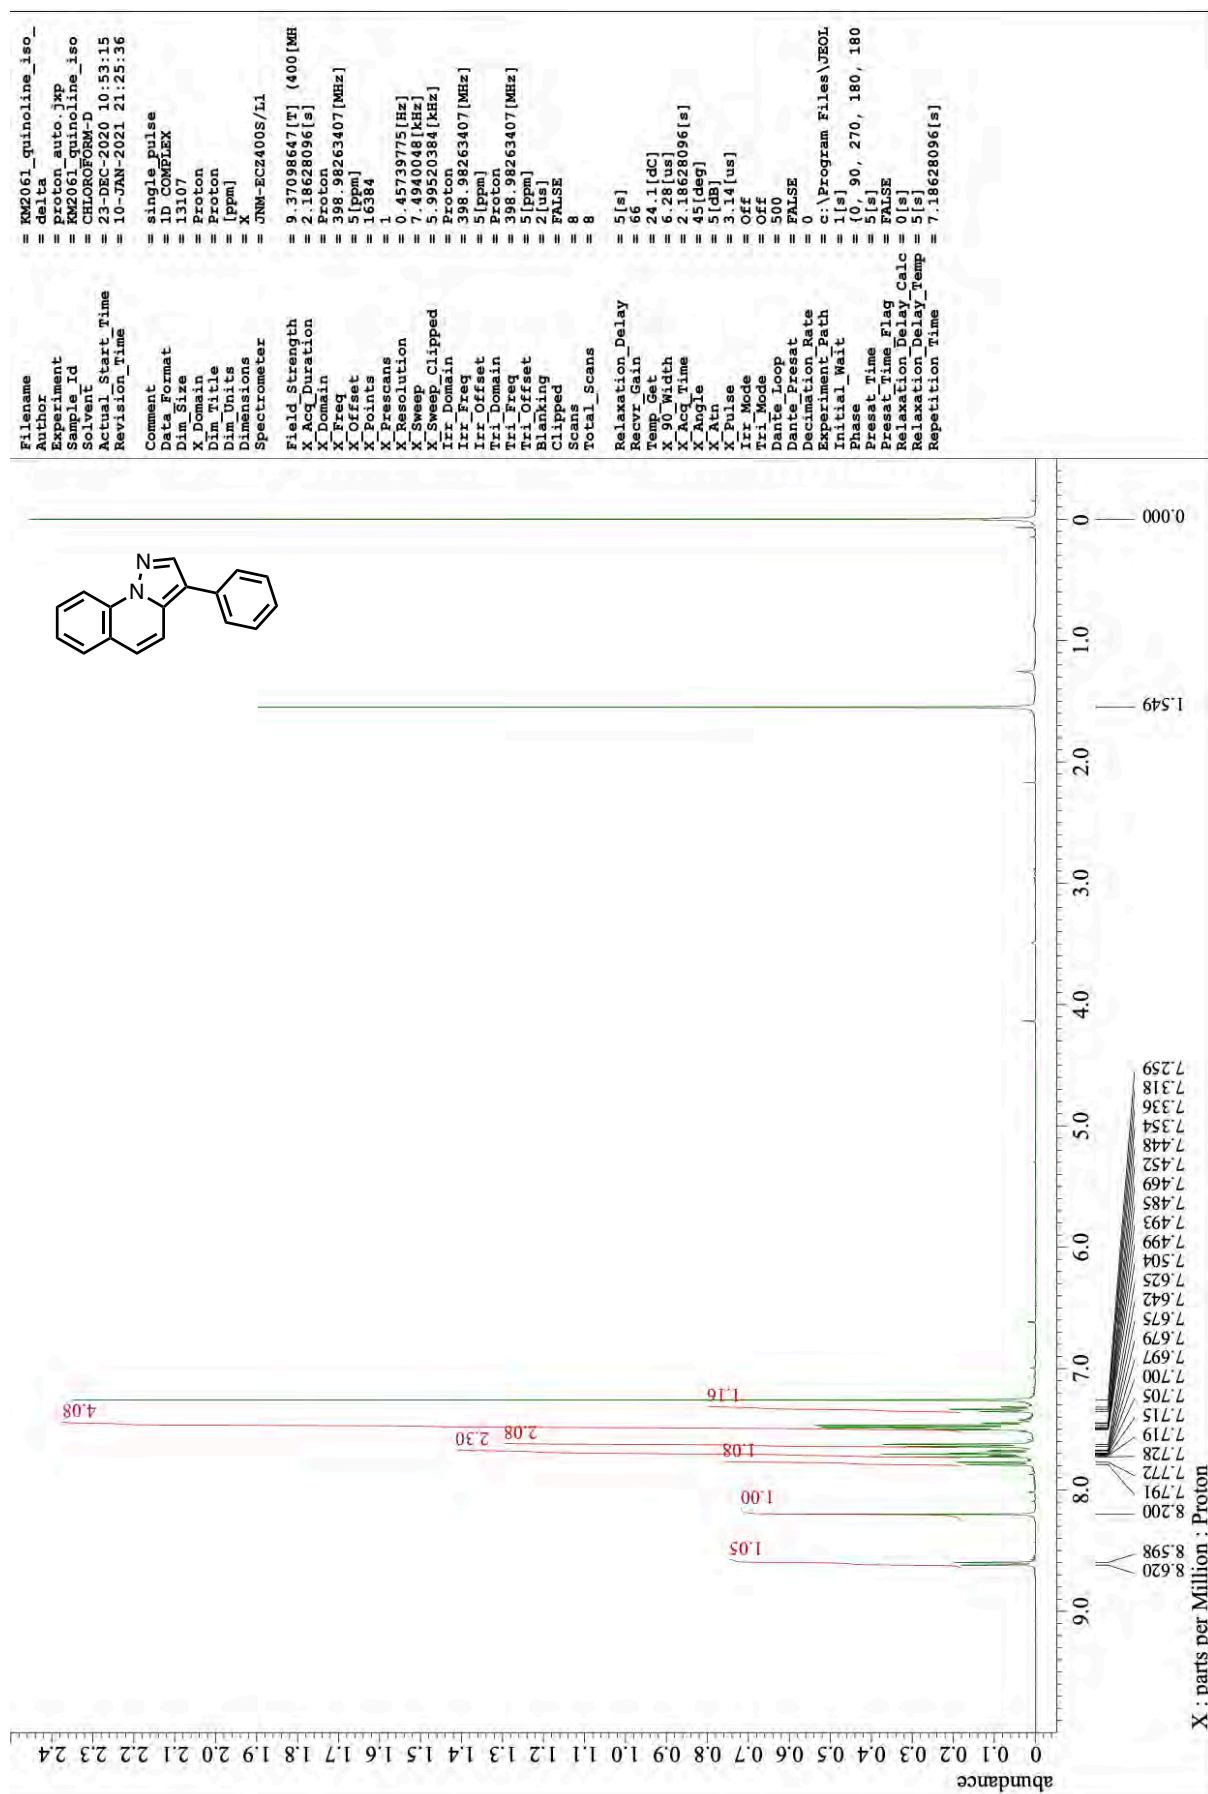

<sup>13</sup>C NMR of IAP (101 MHz, CDCl<sub>3</sub>)

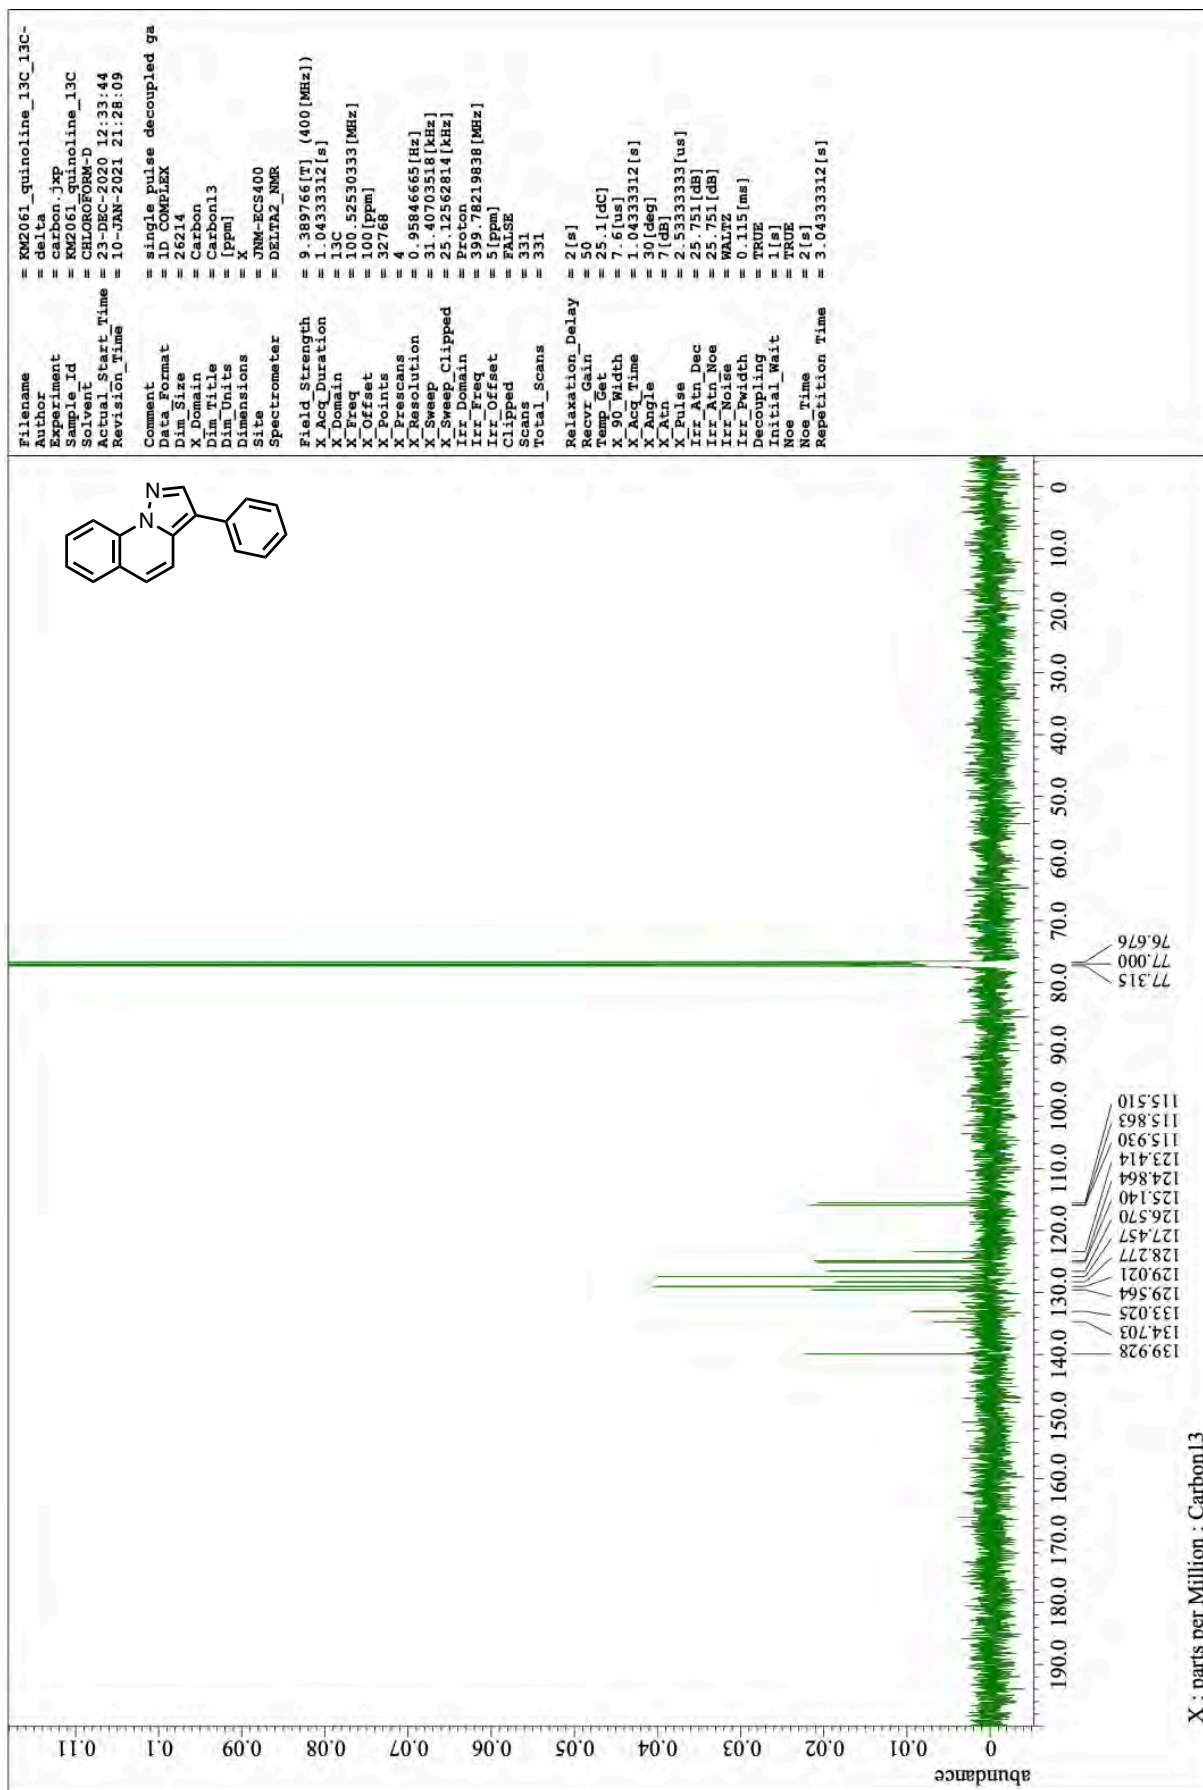

<sup>1</sup>H NMR of 1AQ (400 MHz, CDCl<sub>3</sub>)

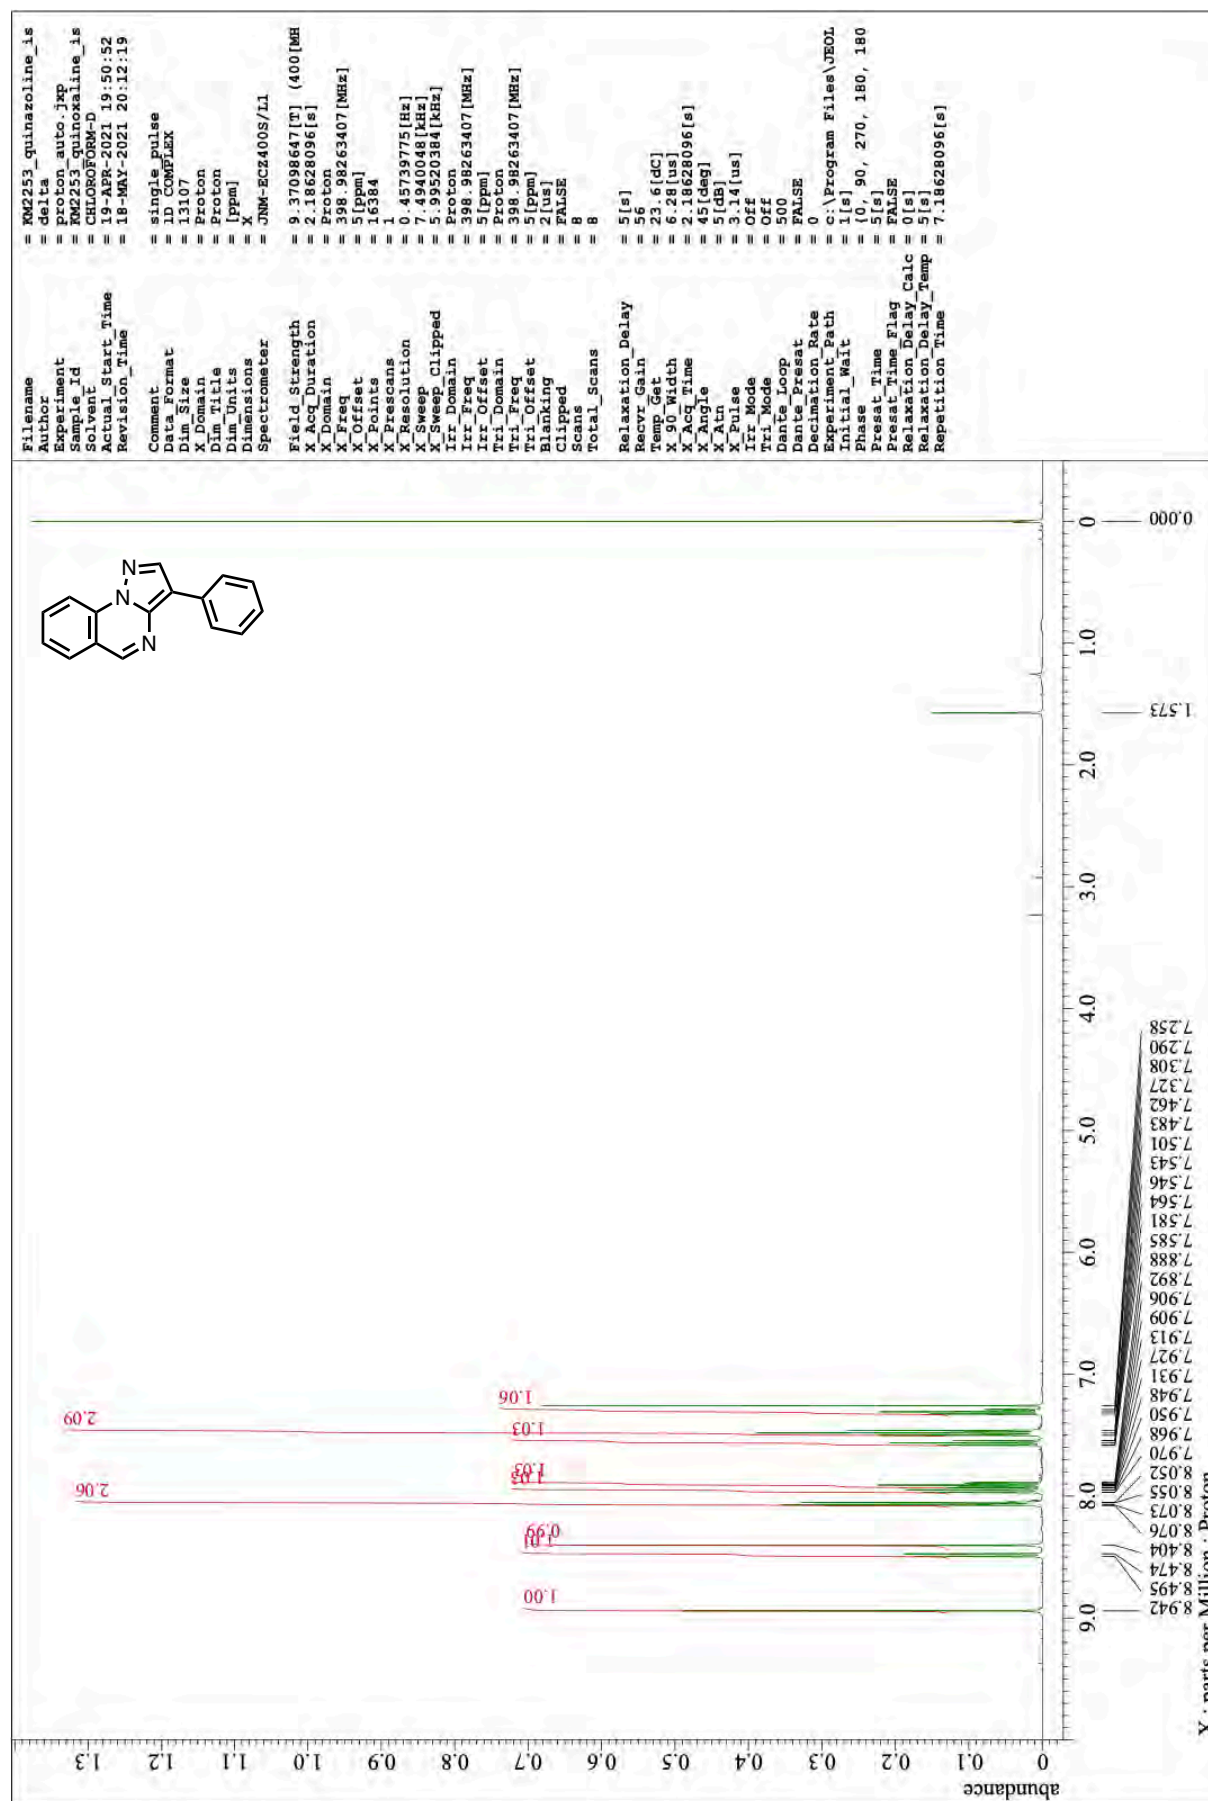



<sup>13</sup>C NMR of 1AQ (101 MHz, CDCl<sub>3</sub>)

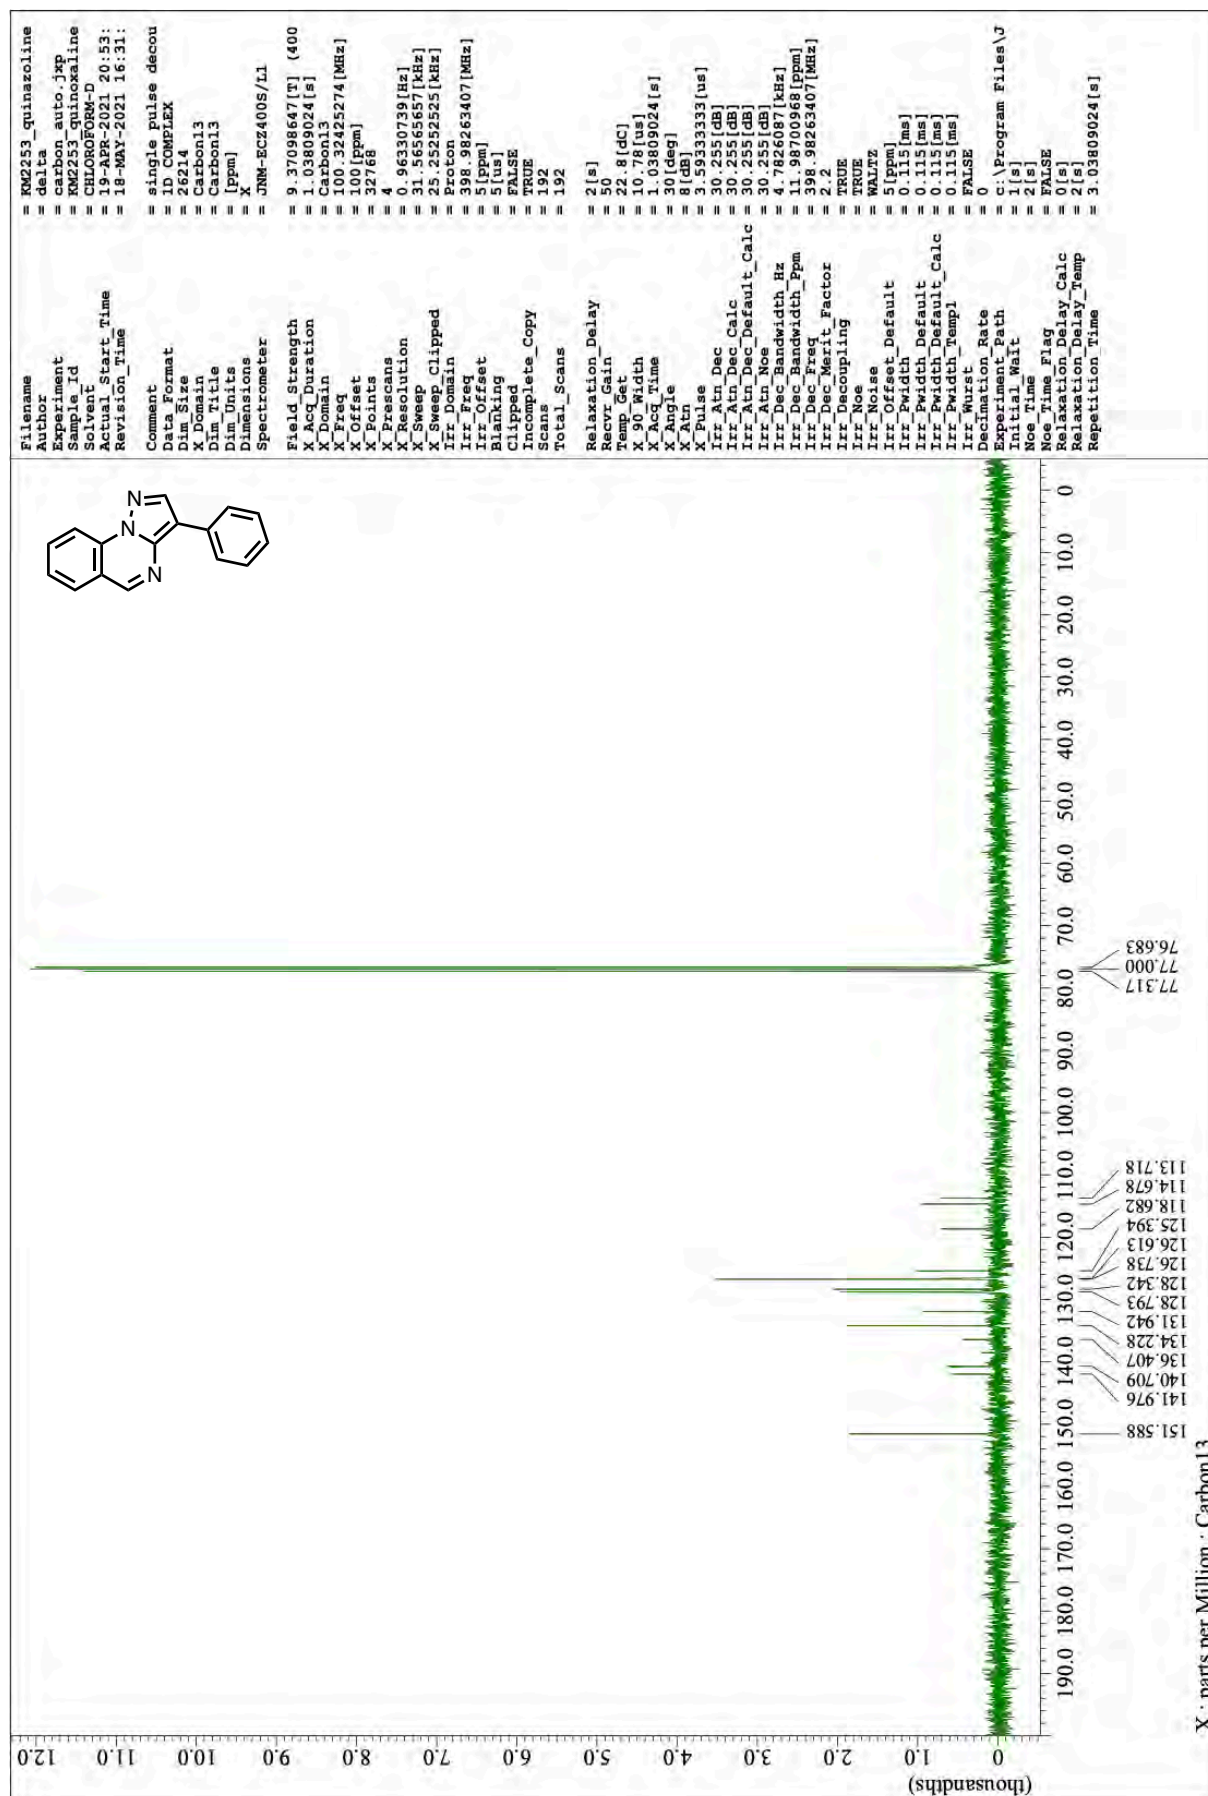

<sup>1</sup>H NMR of 2A (400 MHz, CDCl<sub>3</sub>)

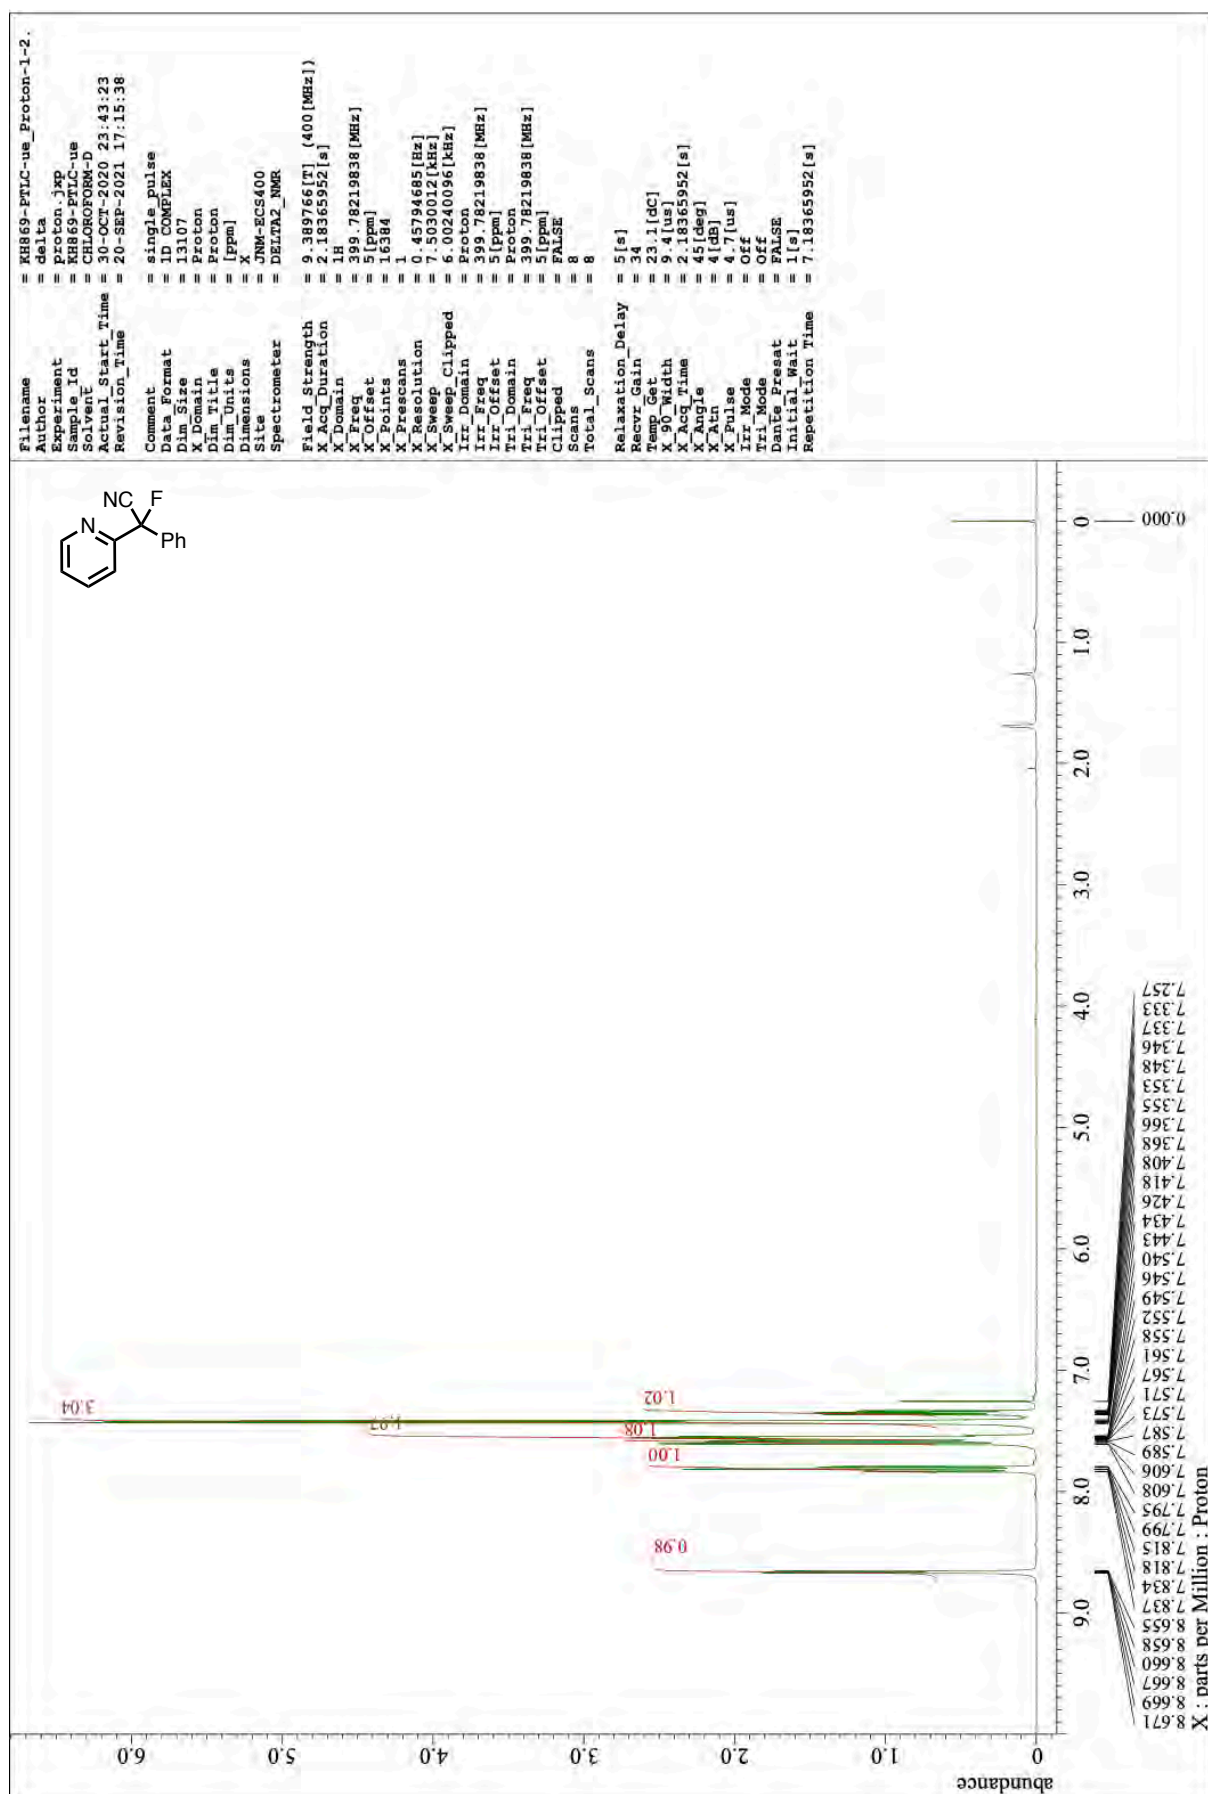

<sup>13</sup>C NMR of 2A (101 MHz, CDCl<sub>3</sub>)

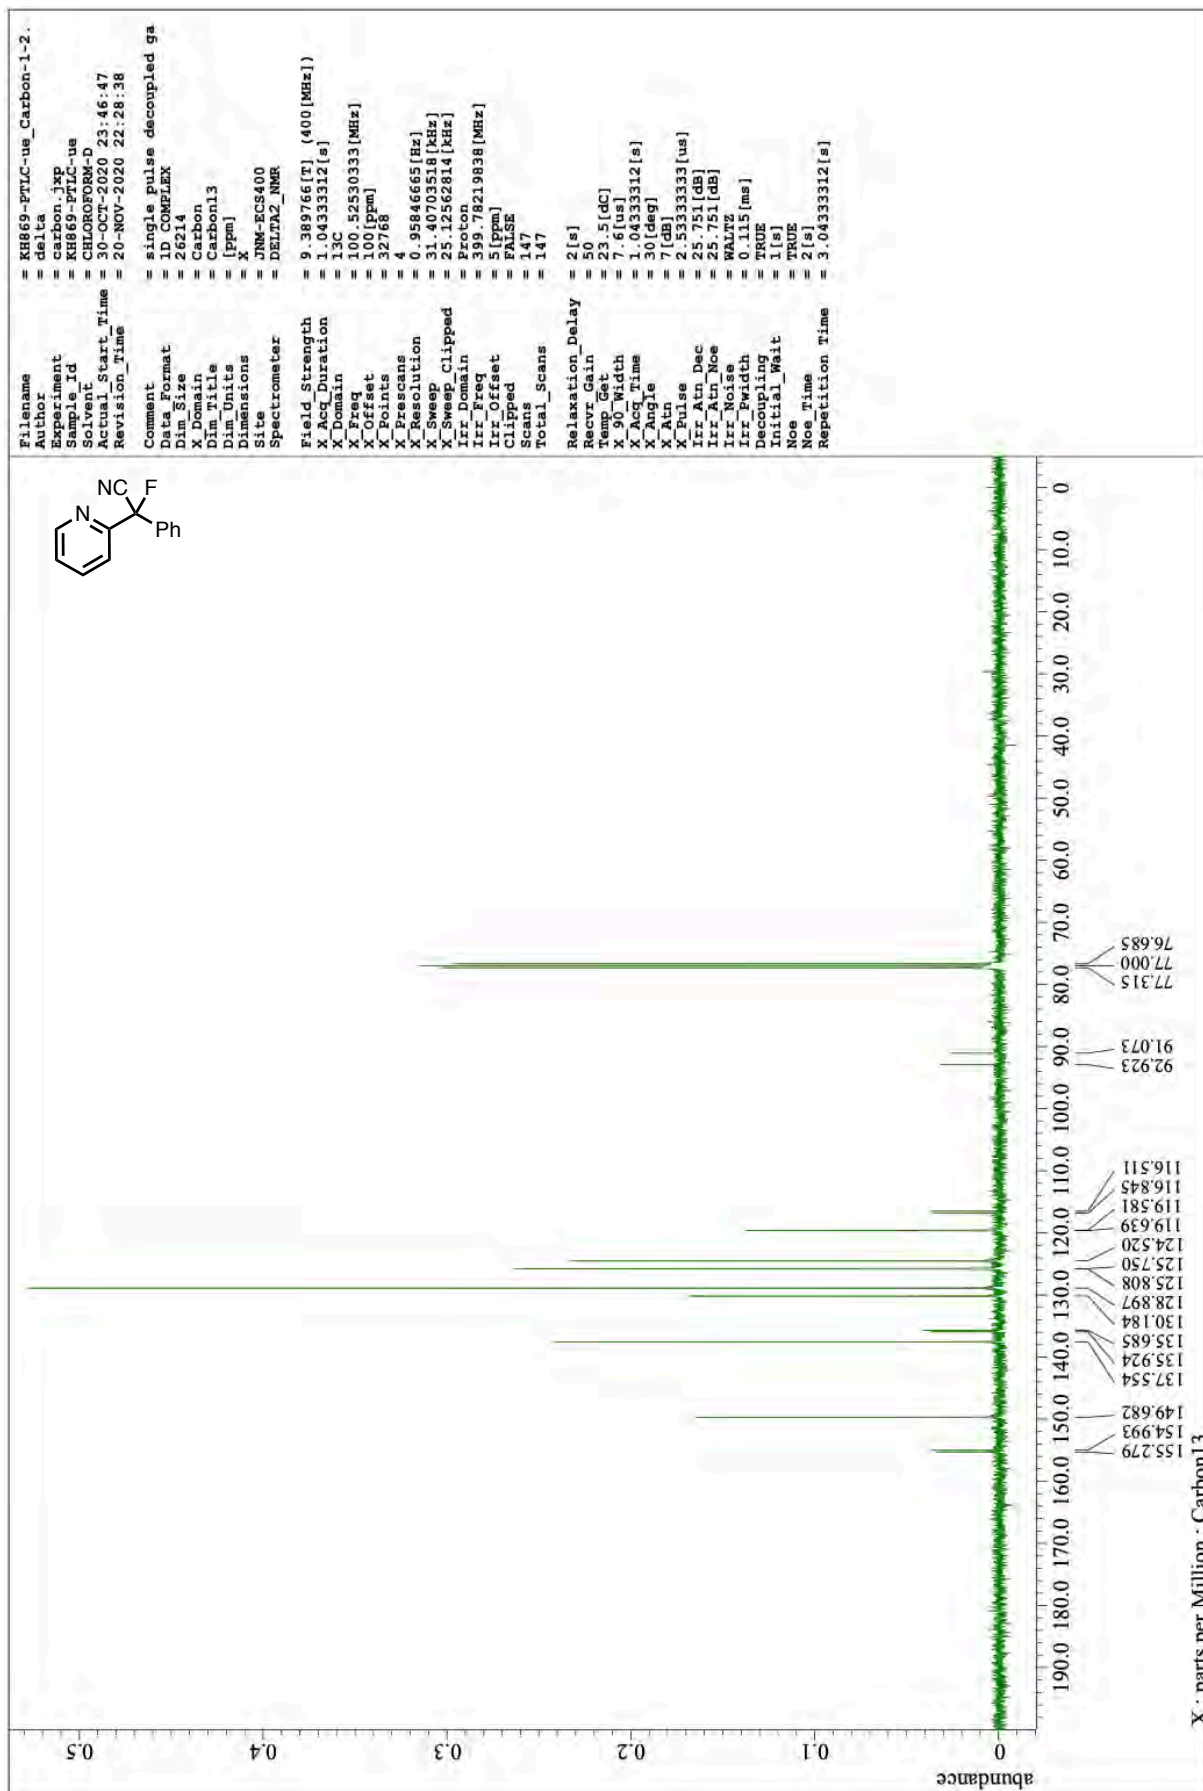

<sup>19</sup>F NMR of 2A (376 MHz, CDCl<sub>3</sub>)

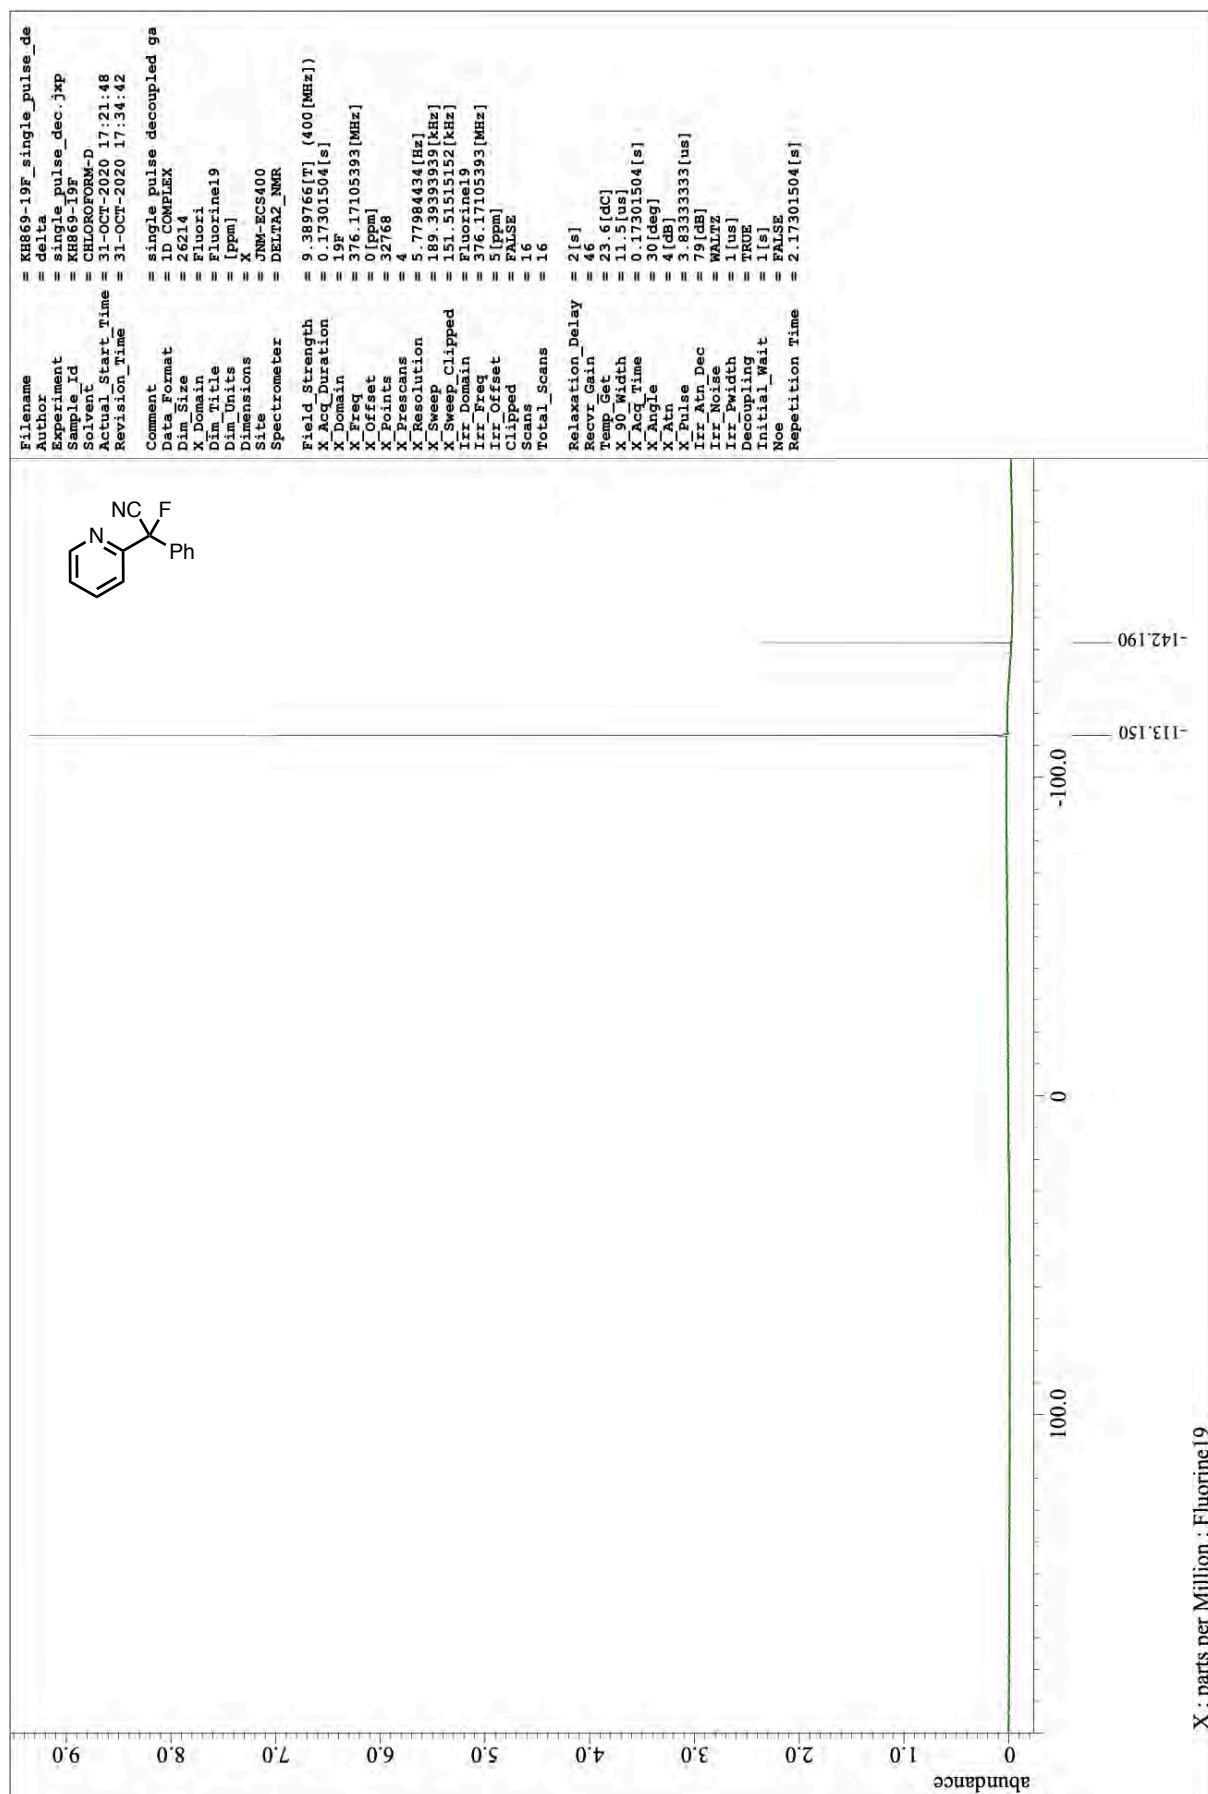

<sup>1</sup>H NMR of **2B** (400 MHz, CDCl<sub>3</sub>)

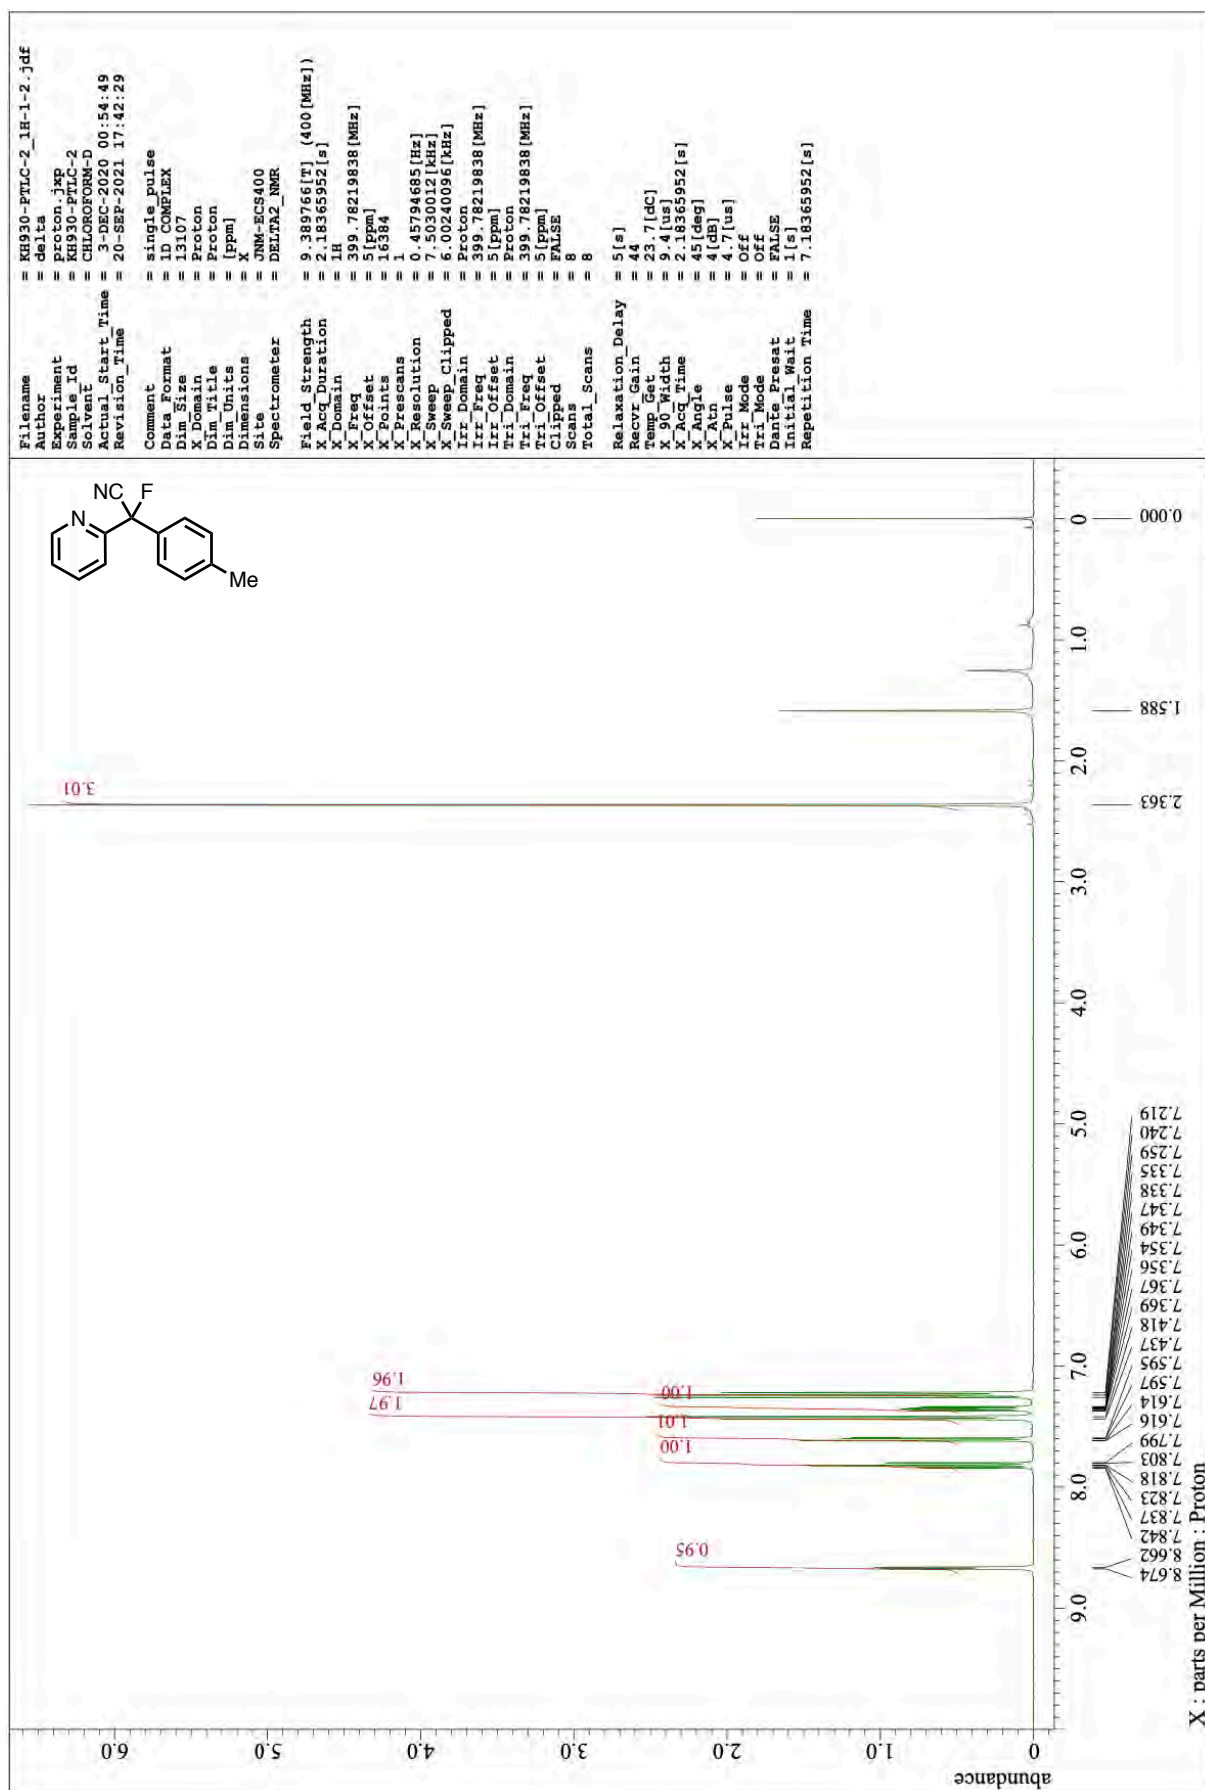

<sup>13</sup>C NMR of **2B** (101 MHz, CDCl<sub>3</sub>)

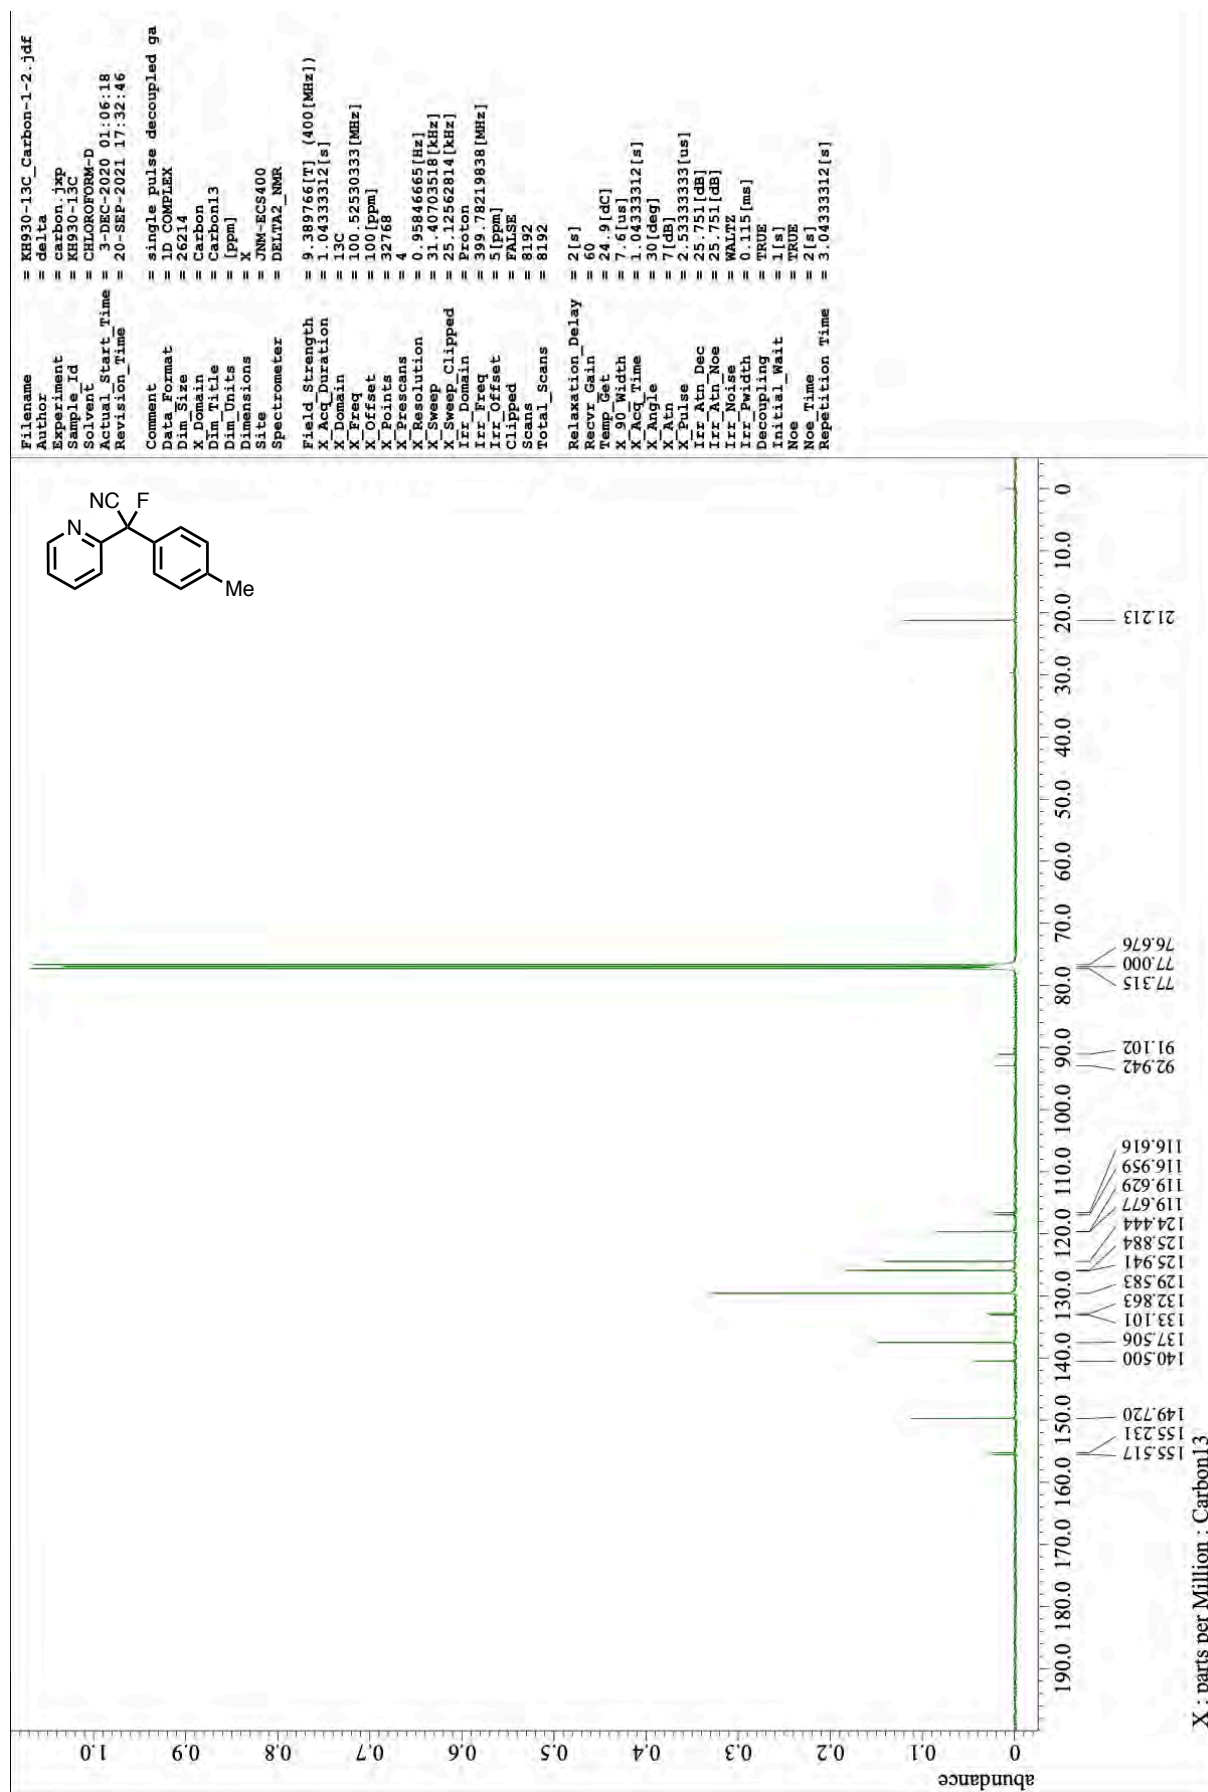

<sup>19</sup>F NMR of 2B (376 MHz, CDCl<sub>3</sub>)

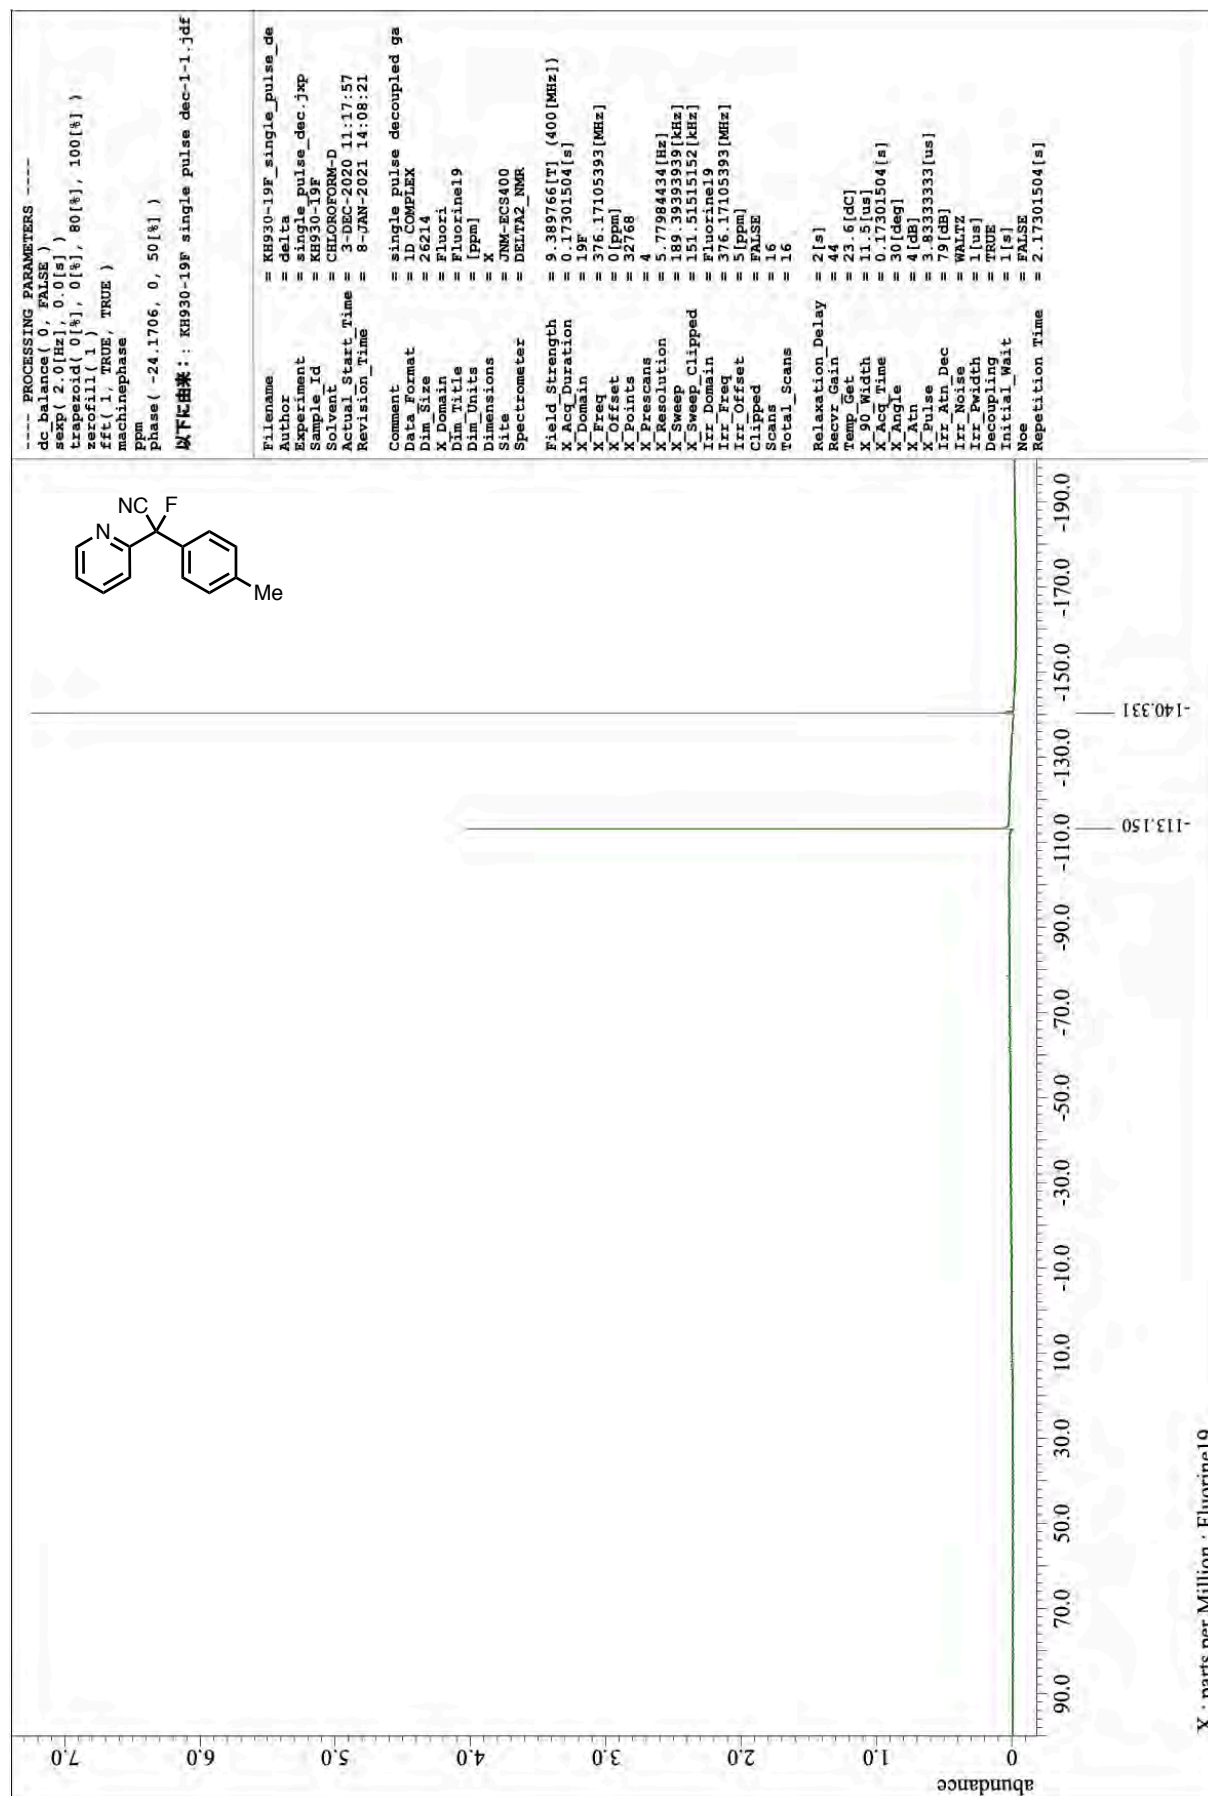

<sup>1</sup>H NMR of 2C (400 MHz, CDCl<sub>3</sub>)

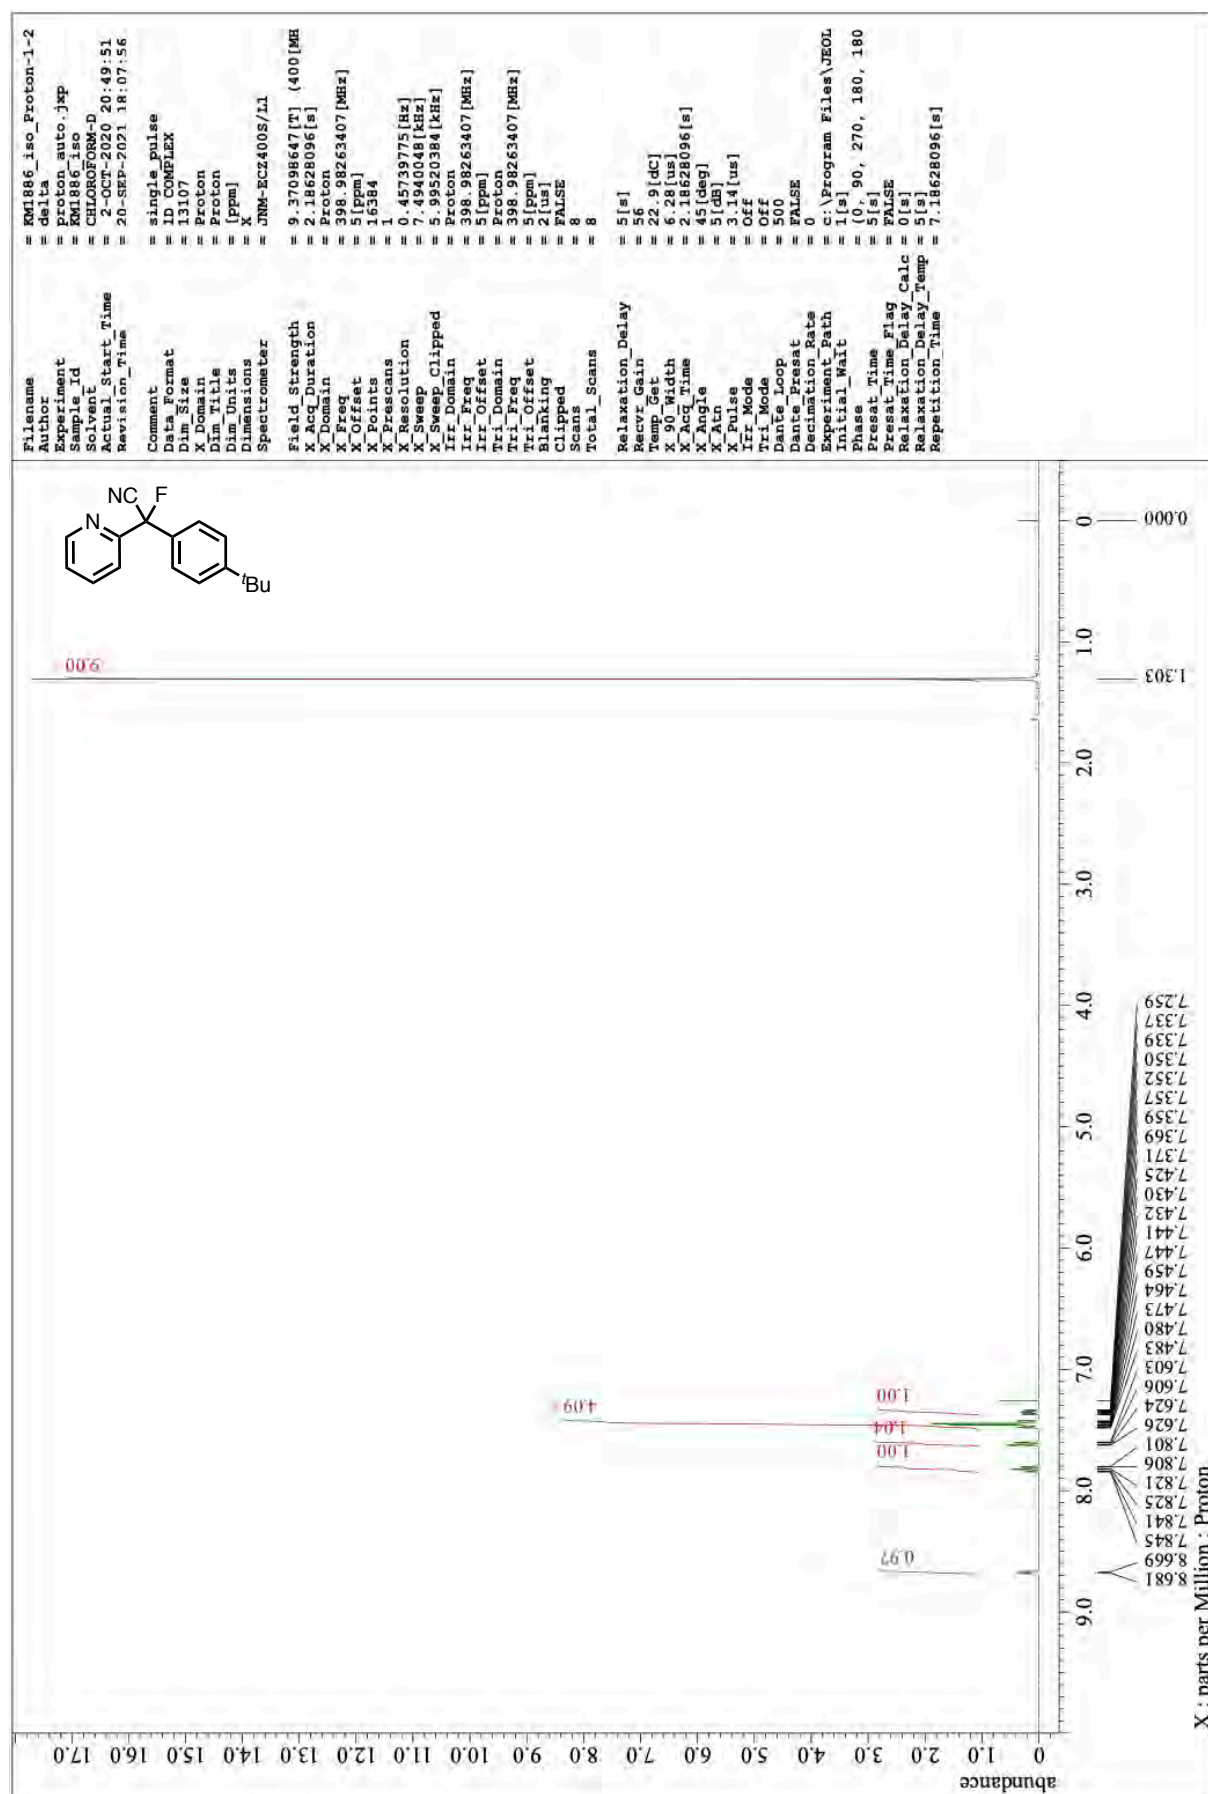



<sup>13</sup>C NMR of 2C (101 MHz, CDCl<sub>3</sub>)

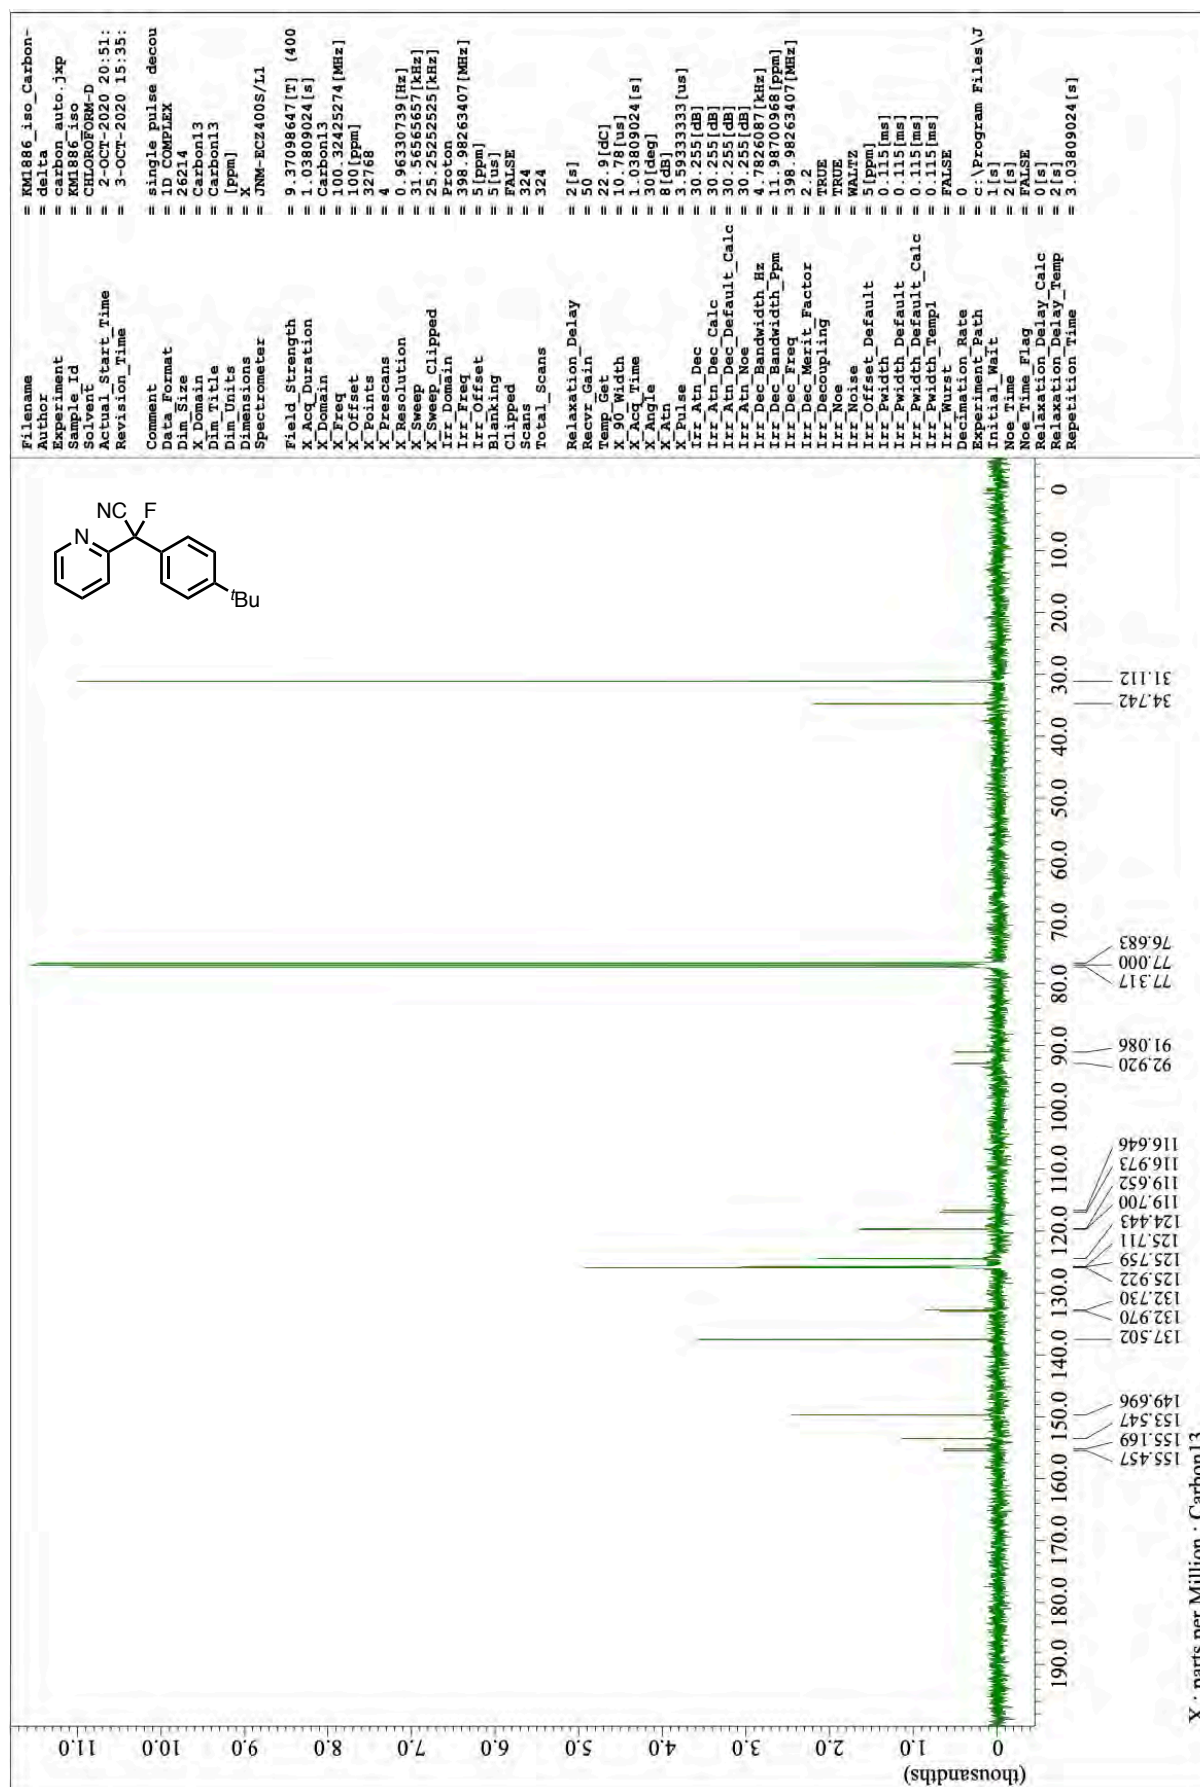

<sup>19</sup>F NMR of 2C (376 MHz, CDCl<sub>3</sub>)

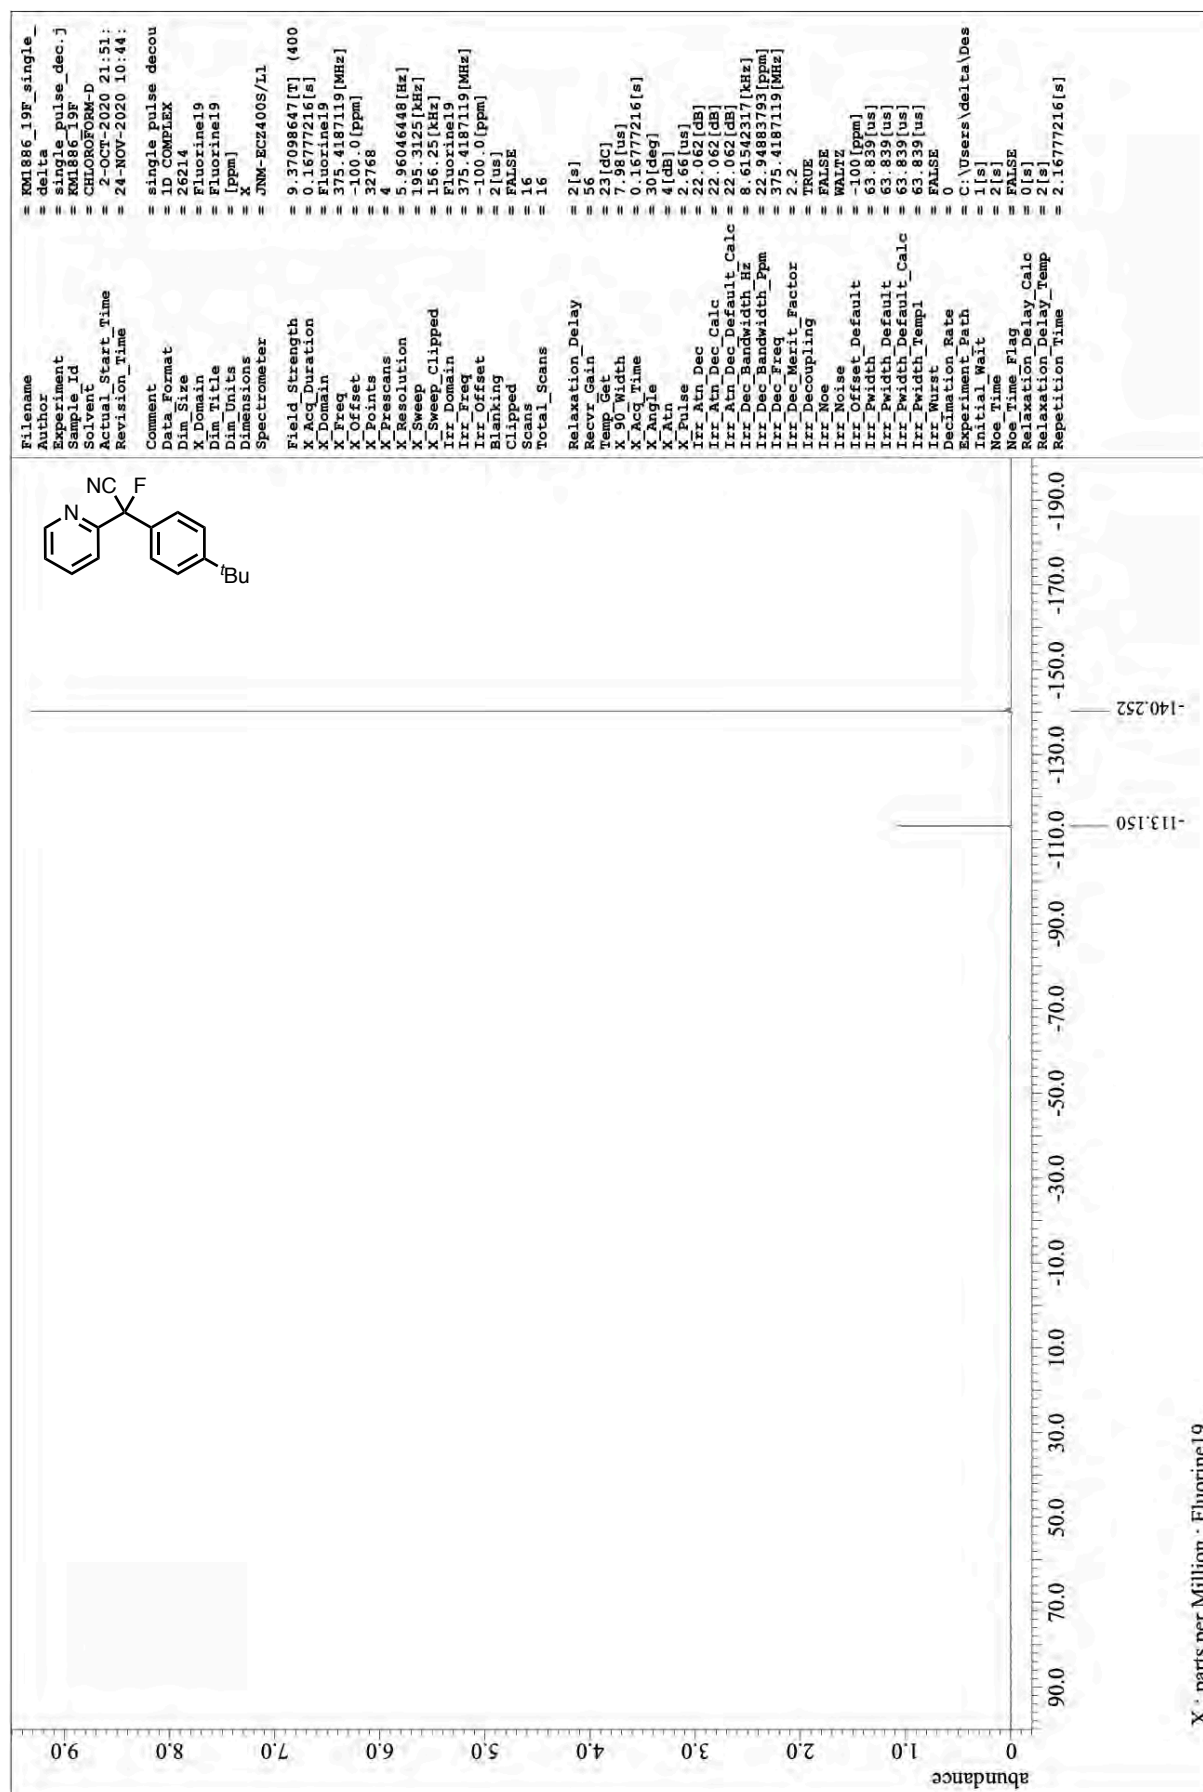

<sup>1</sup>H NMR of 2D (400 MHz, CDCl<sub>3</sub>)

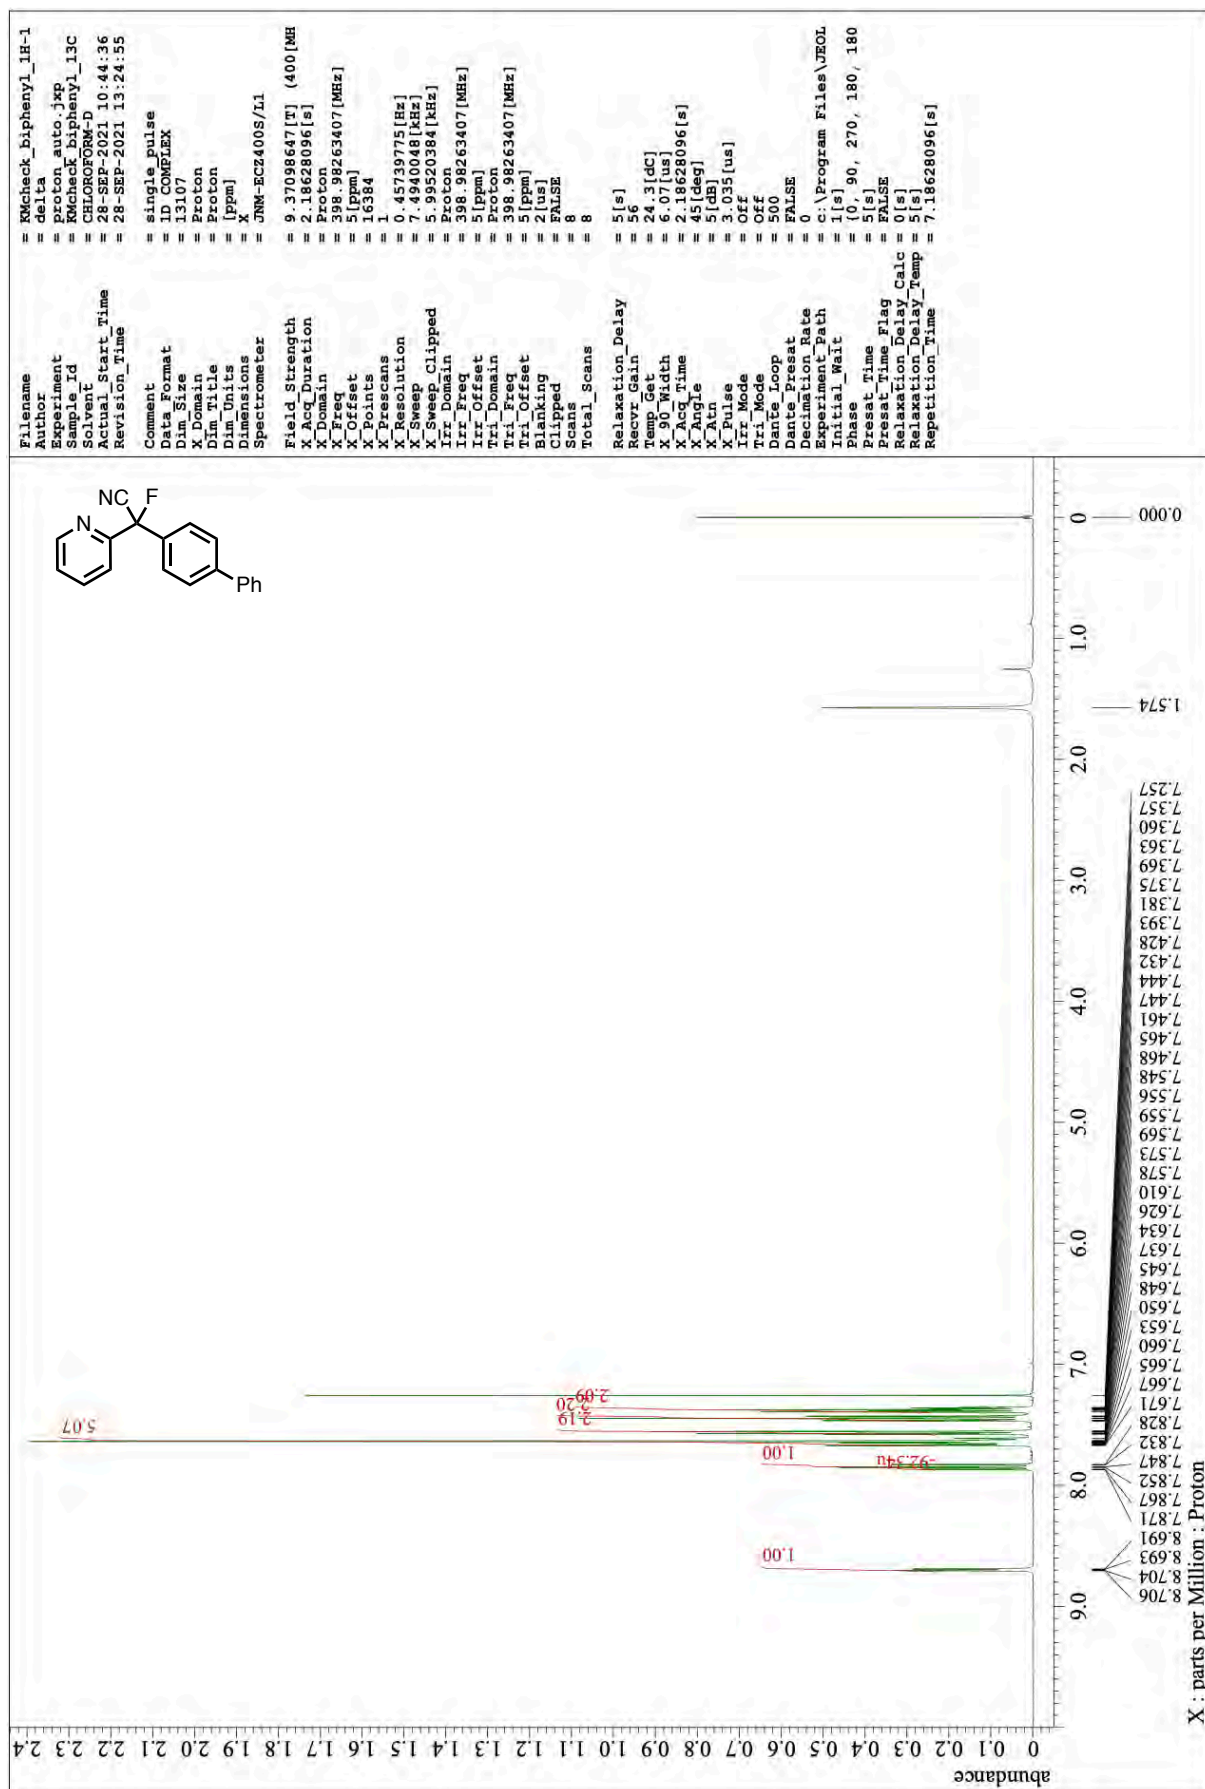

<sup>13</sup>C NMR of 2D (101 MHz, CDCl<sub>3</sub>)

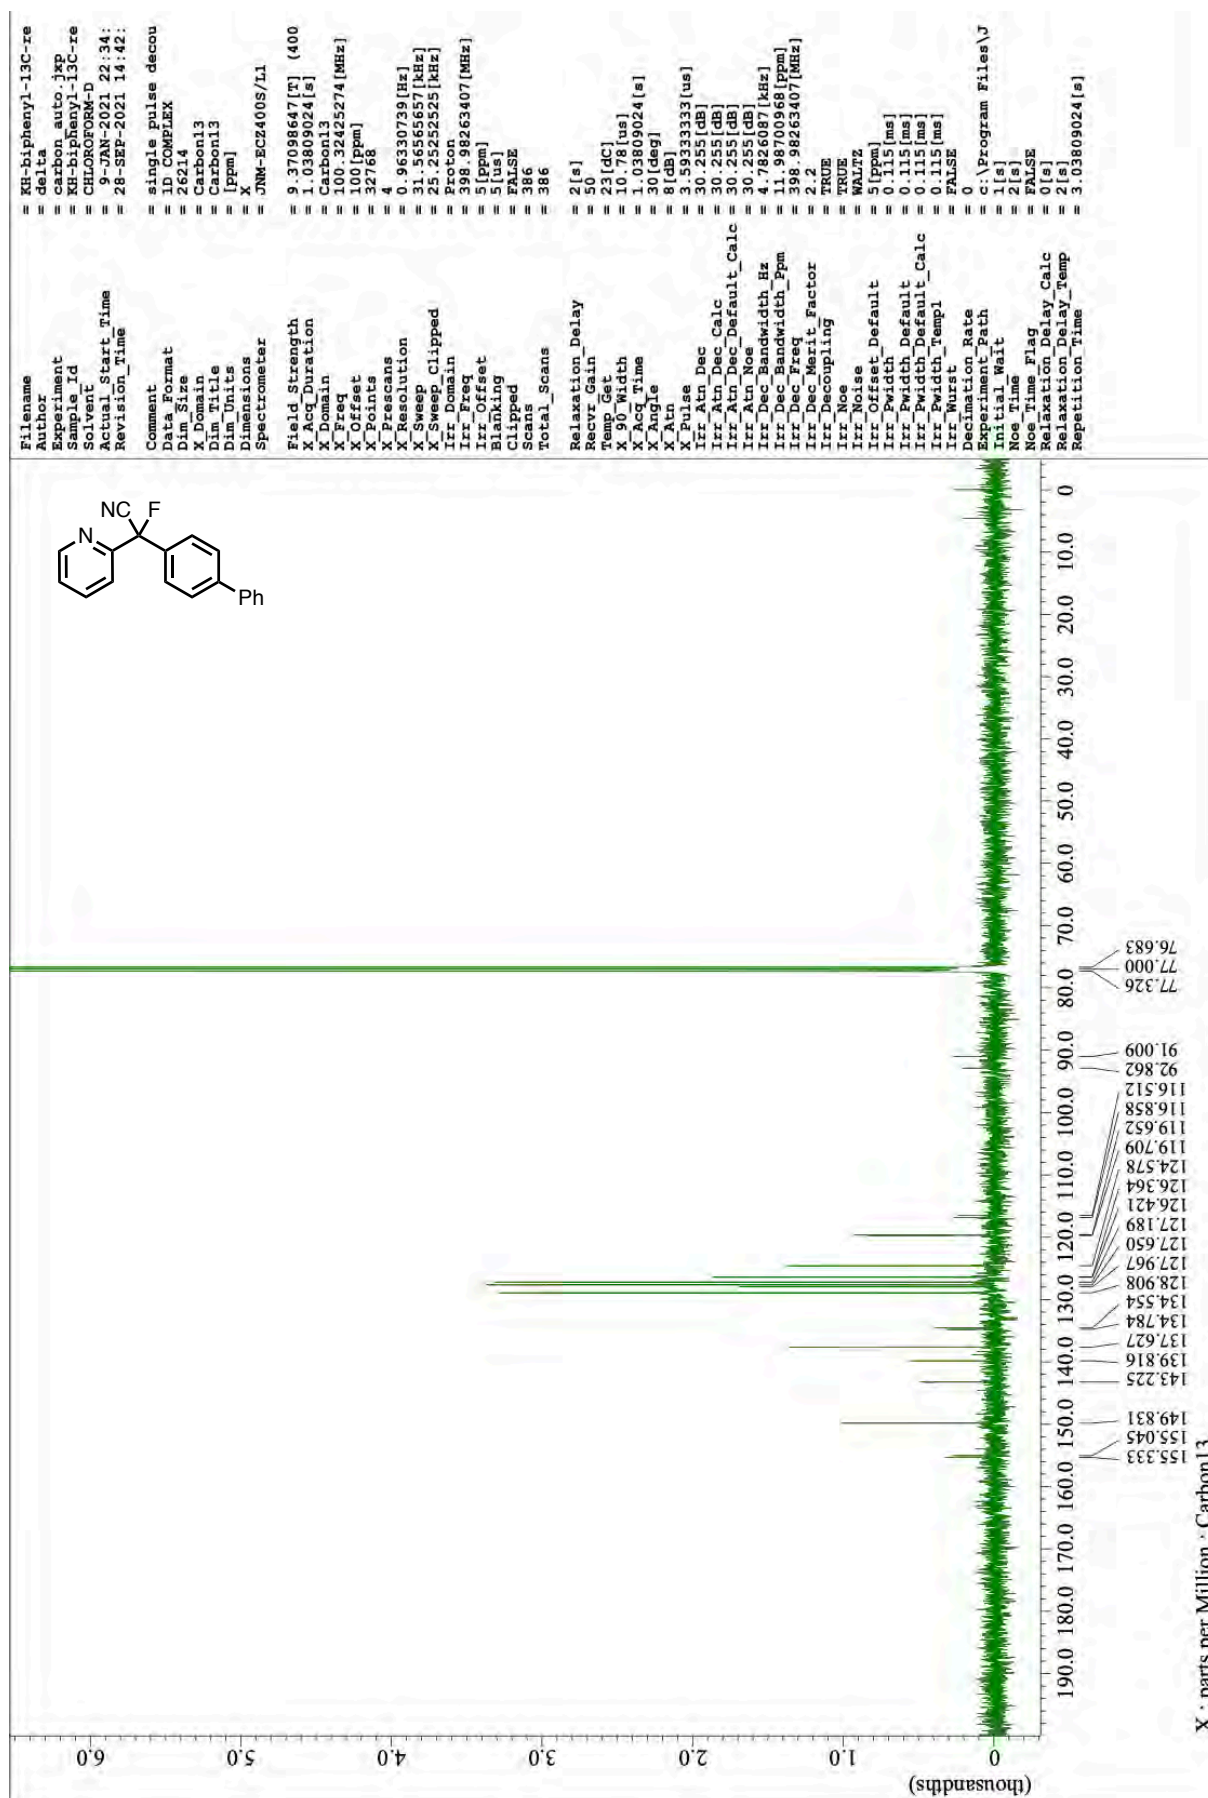

```

Filename = KH-biphenyl-13C-re
Author =
Experiment = carbon_auto_jxp
SampleId = KH-biphenyl-13C-re
Solvent = CHLOROFORM-D
Actual_Start_Time = 9-JUN-2021 22:34:
Revision_Time = 28-SEP-2021 14:42:
Comment = single pulse decou
ID = COMPLEX
Date_Format = 26214
Dir_Size =
X Domain = Carbon13
Dim Title = Carbon13
Dim Units = [ppm]
Dimensions = X
Spectrometer = JNM-ECZ400S/L1
Field_Strength = 9.37098647(T) (400
X Acq_Duration = 1.03809024[s]
X Domain = Carbon13
X Freq = 100.32425274 [MHz]
X Offset = 100 [ppm]
X Points = 32768
X Prescans = 4
X Resolution = 0.96330739 [Hz]
X Sweep = 31.56565657 [kHz]
X Sweep_Clippped = 25.24252525 [kHz]
Proton =
Irr Freq = 398.98263407 [MHz]
Irr Offset = 5 [ppm]
Blanking = FALSE
Clipped =
Scans = 386
Total_Scans = 386
Relaxation_Delay = 2[s]
Recvr Gain = 50
Temp Get = 23[dc]
X 90_Width = 10.78 [us]
X Acq Time = 1.03809024 [s]
X Angle = 30 [deg]
X Atn = 8 [dB]
X Pulse = 3.59333333 [us]
Irr Atn Dec = 30.255 [dB]
Irr Atn Dec Calc = 30.255 [dB]
Irr Atn Dec_Default_Calc = 30.255 [dB]
Irr Atn Noe = 30.255 [dB]
Irr Dec Bandwidth Hz = 4.7826087 [kHz]
Irr Dec Bandwidth_Ppm = 11.98700968 [ppm]
Irr Dec Freq = 398.98263407 [MHz]
Irr Dec Merit Factor = 2.2
Irr Decoupling = TRUE
Irr Noe = TRUE
Irr Noise = WALTZ
Irr Offset Default = 5 [ppm]
Irr Pwidth = 0.115 [ms]
Irr Pwidth Default = 0.115 [ms]
Irr Pwidth_Default_Calc = 0.115 [ms]
Irr Pwidth_Temp = 0.115 [ms]
Irr Wurst = FALSE
Decimation Rate = 0
Experiment Path = c:\Program Files\J
Initial Wait = 1[s]
Noe Time = 2[s]
Noe Time Flag = FALSE
Relaxation_Delay_Calc = 0[s]
Relaxation_Delay_Temp = 2[s]
Repetition Time = 3.03809024 [s]

```

<sup>19</sup>F NMR of 2D (376 MHz, CDCl<sub>3</sub>)

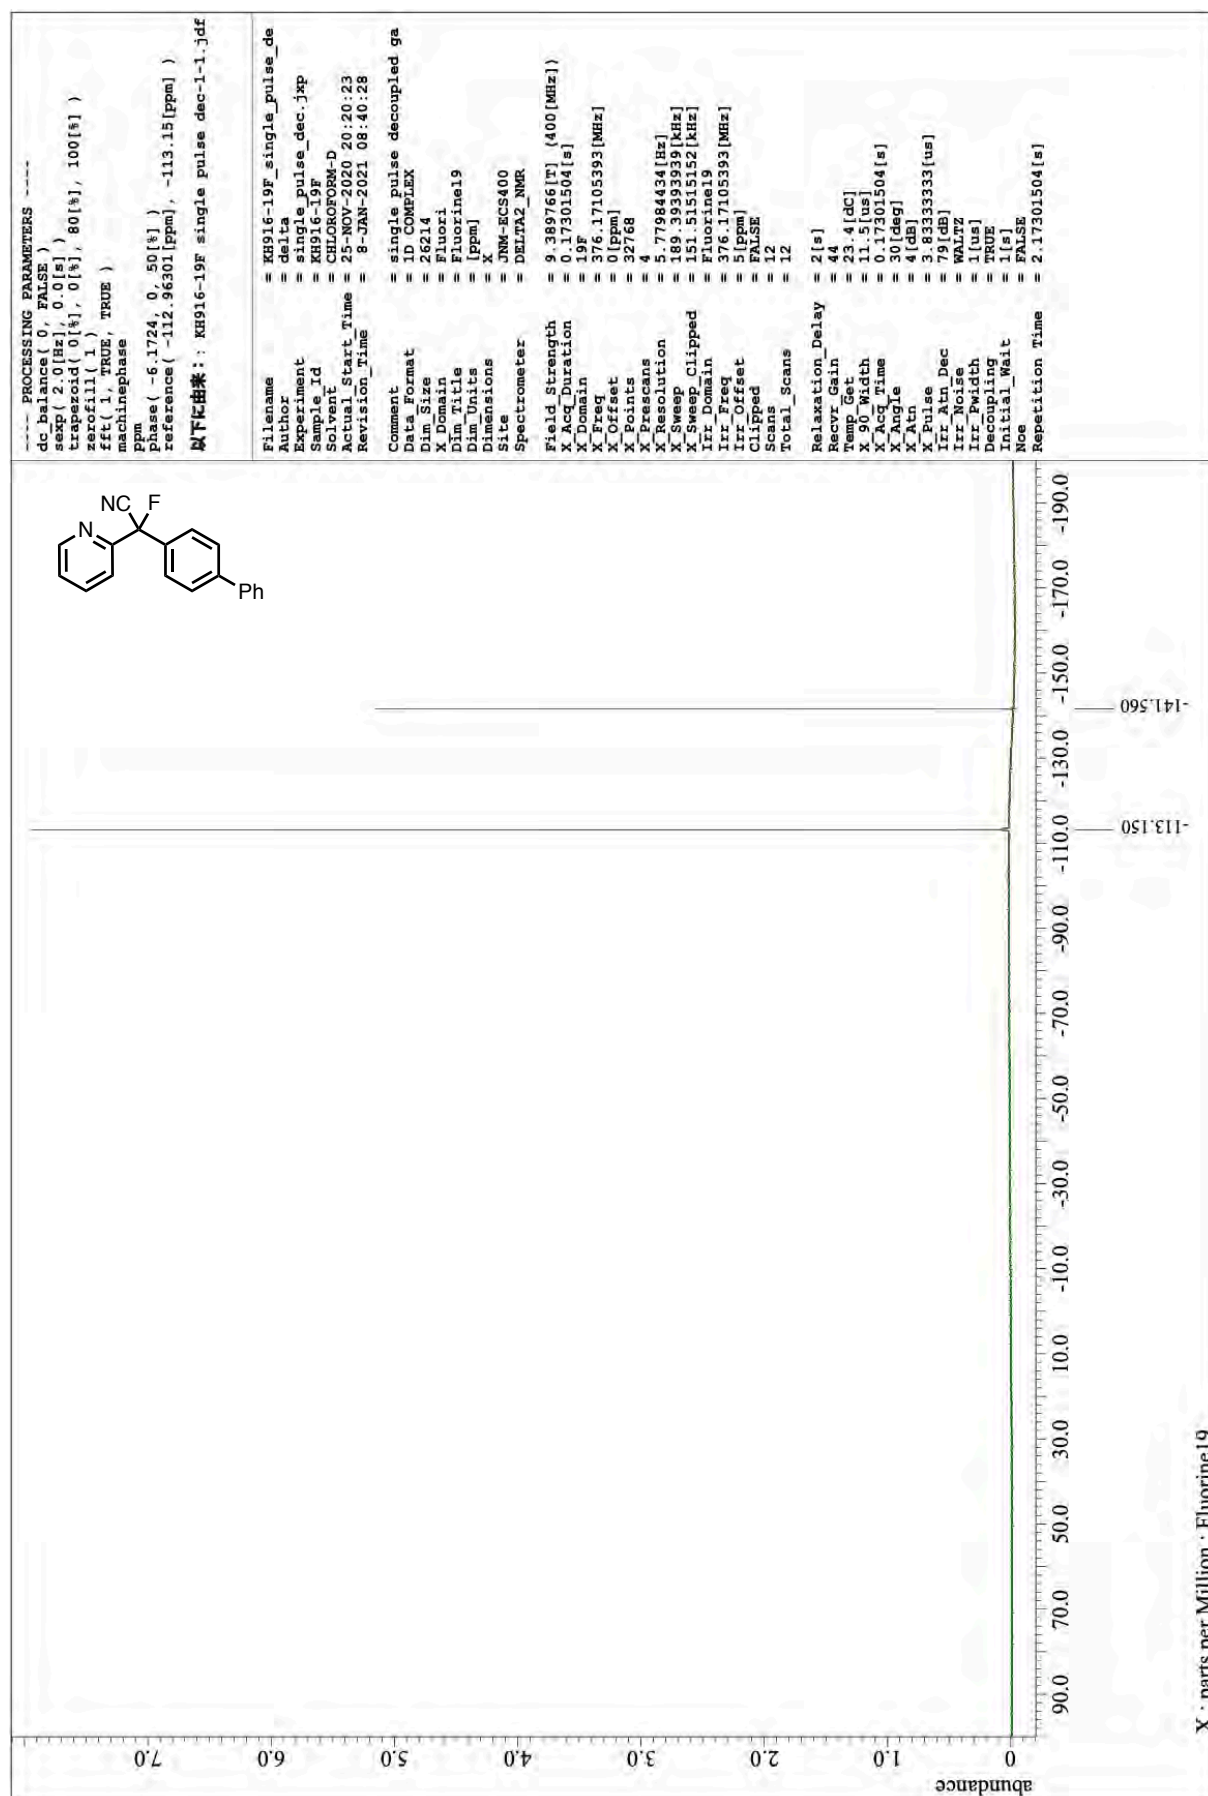

<sup>1</sup>H NMR of 2E (400 MHz, CDCl<sub>3</sub>)

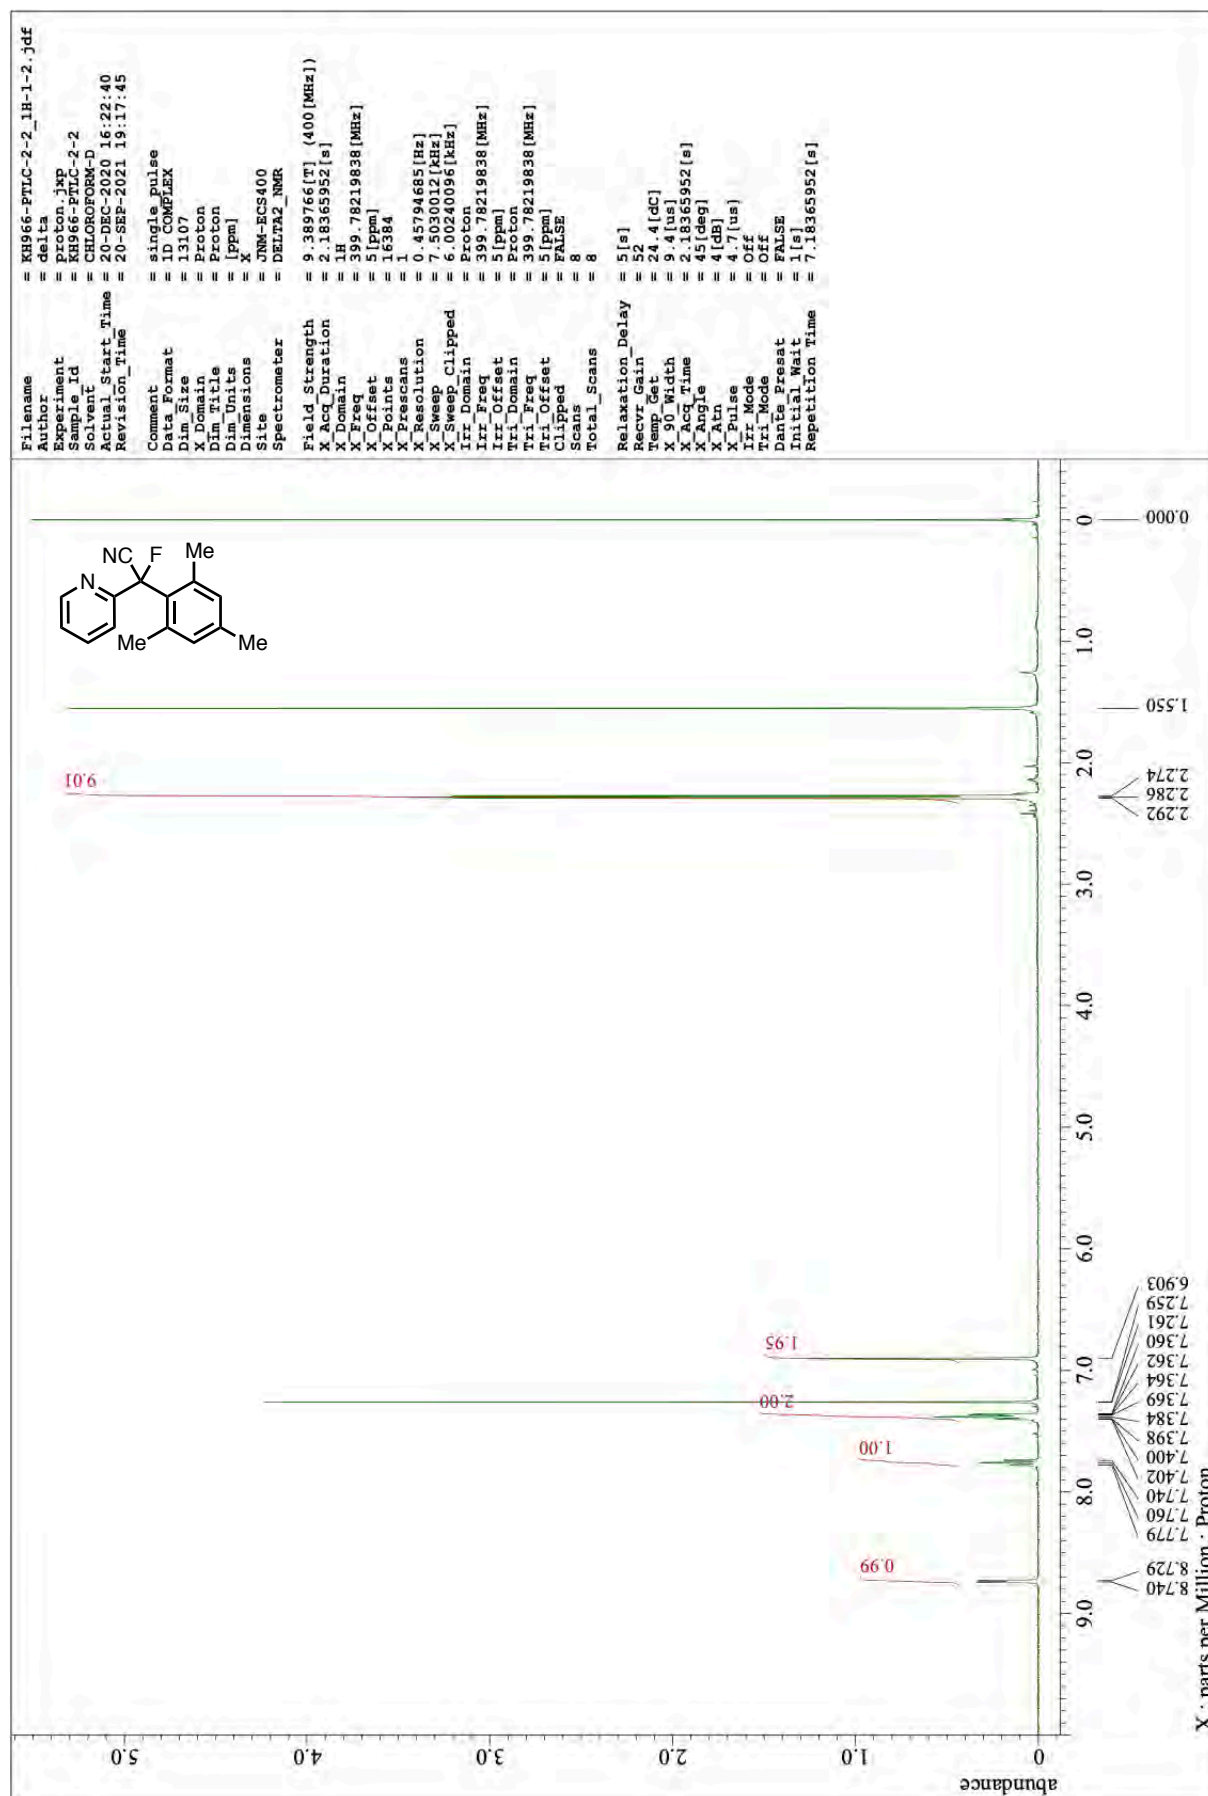

<sup>13</sup>C NMR of 2E (101 MHz, CDCl<sub>3</sub>)

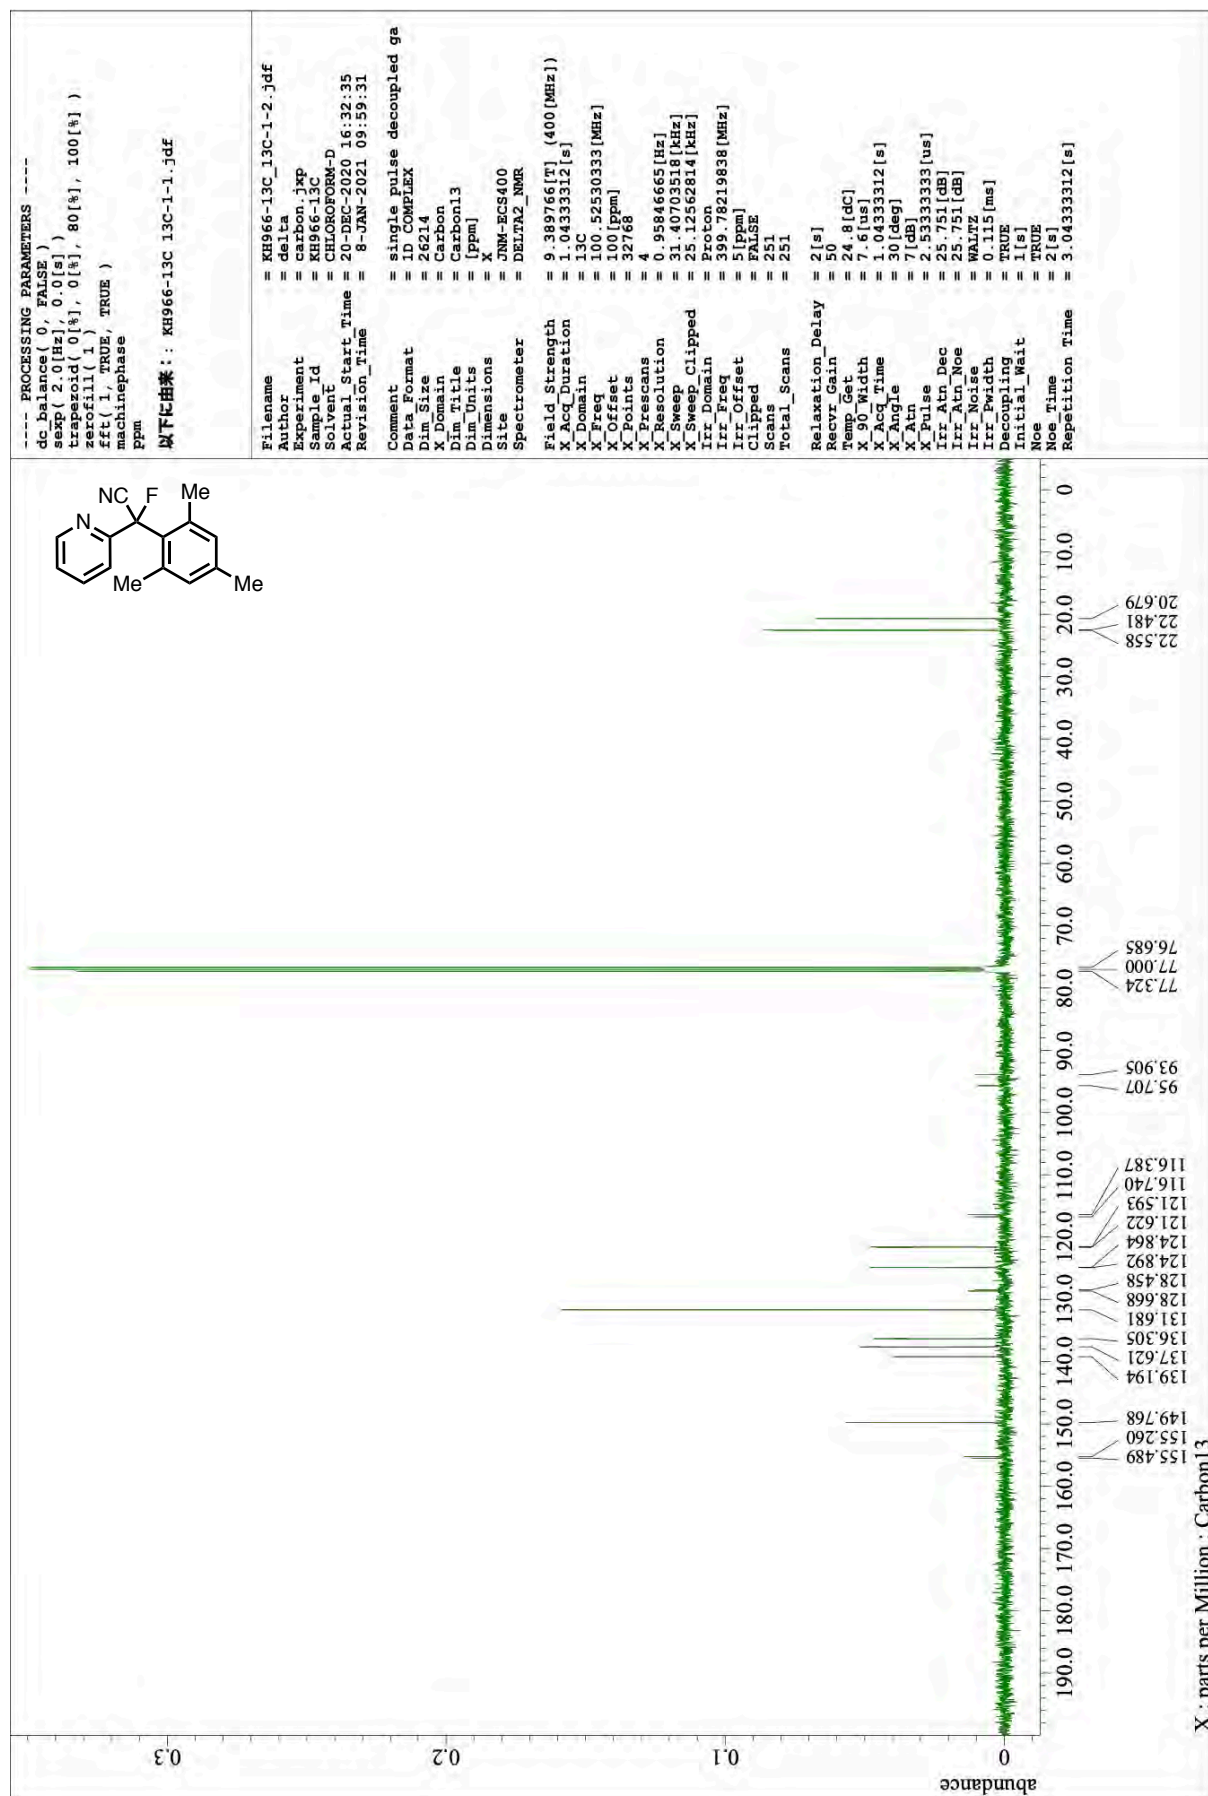

<sup>19</sup>F NMR of 2E (376 MHz, CDCl<sub>3</sub>)

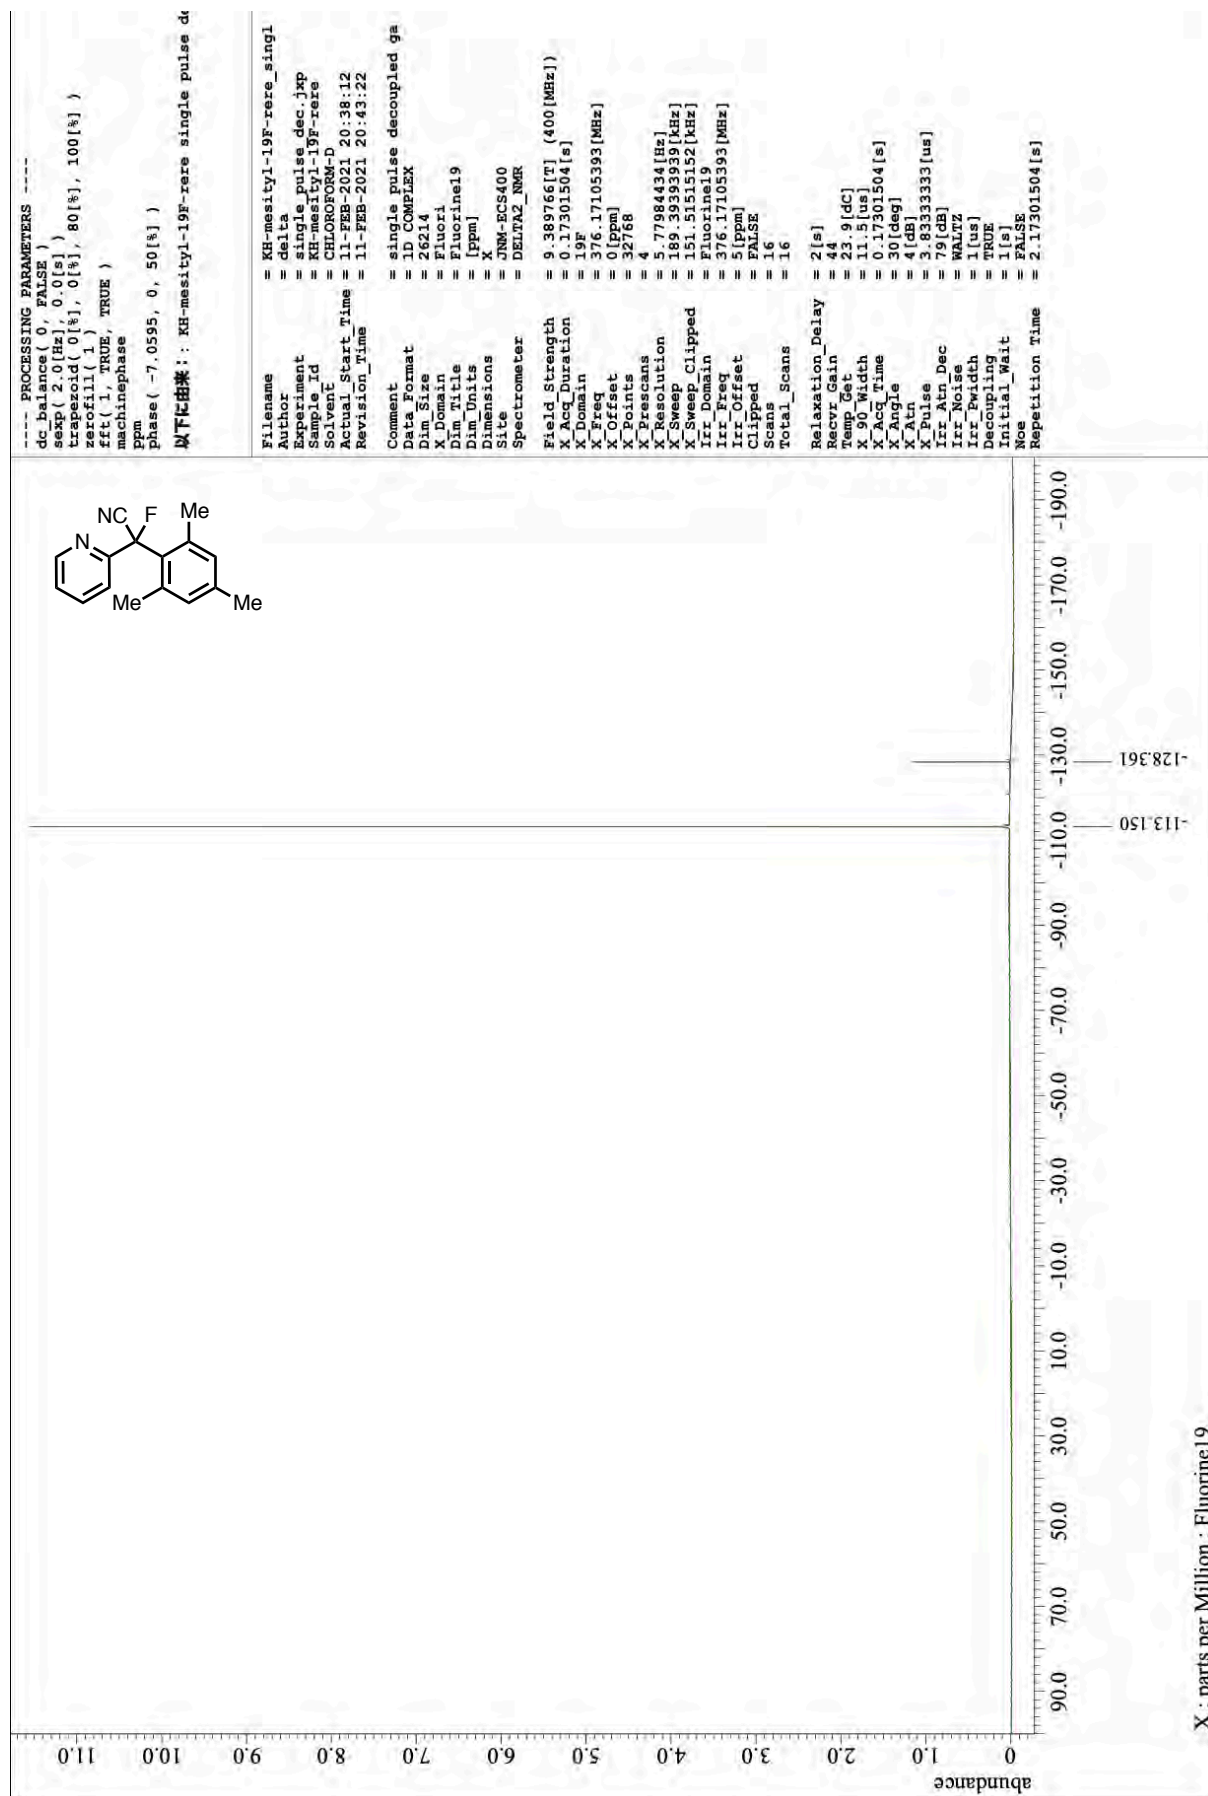



<sup>1</sup>H NMR of 2F (400 MHz, CDCl<sub>3</sub>)

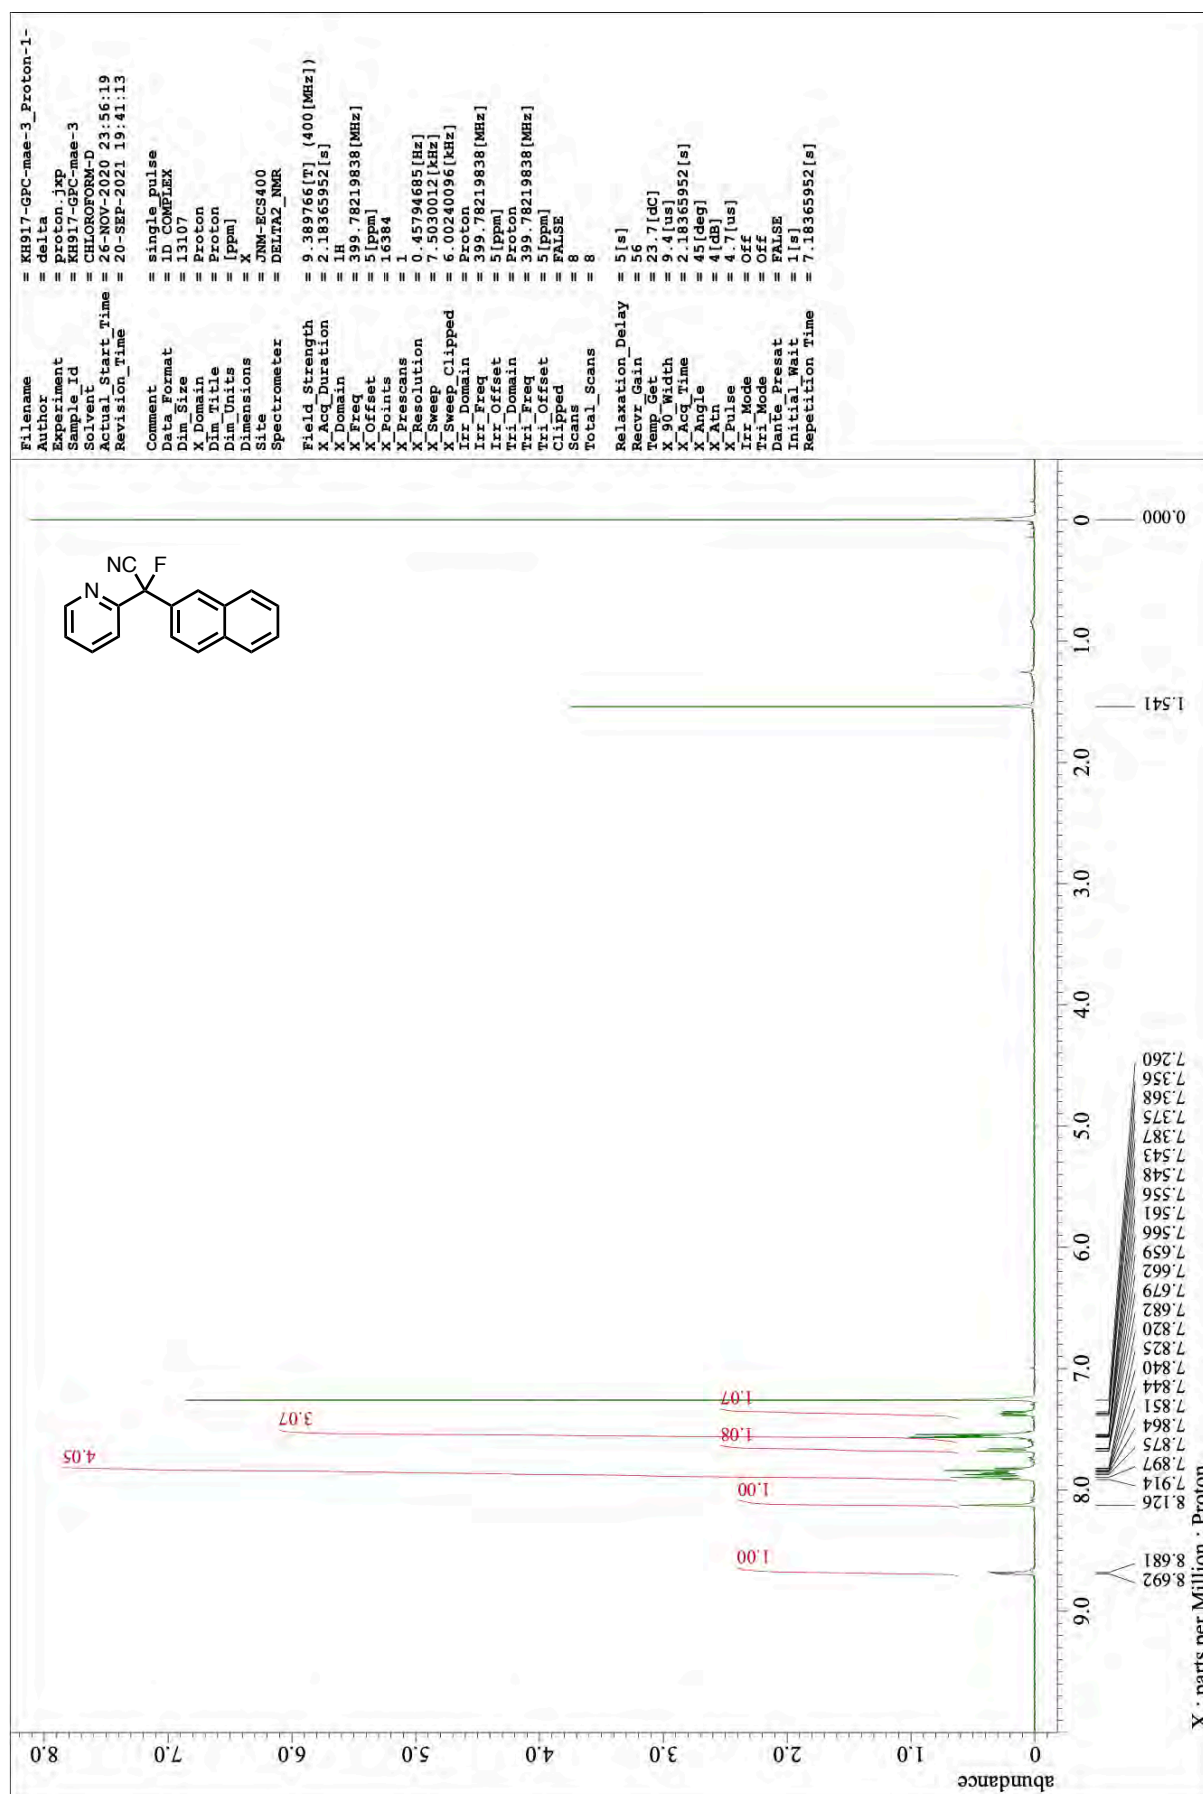

<sup>13</sup>C NMR of 2F (101 MHz, CDCl<sub>3</sub>)

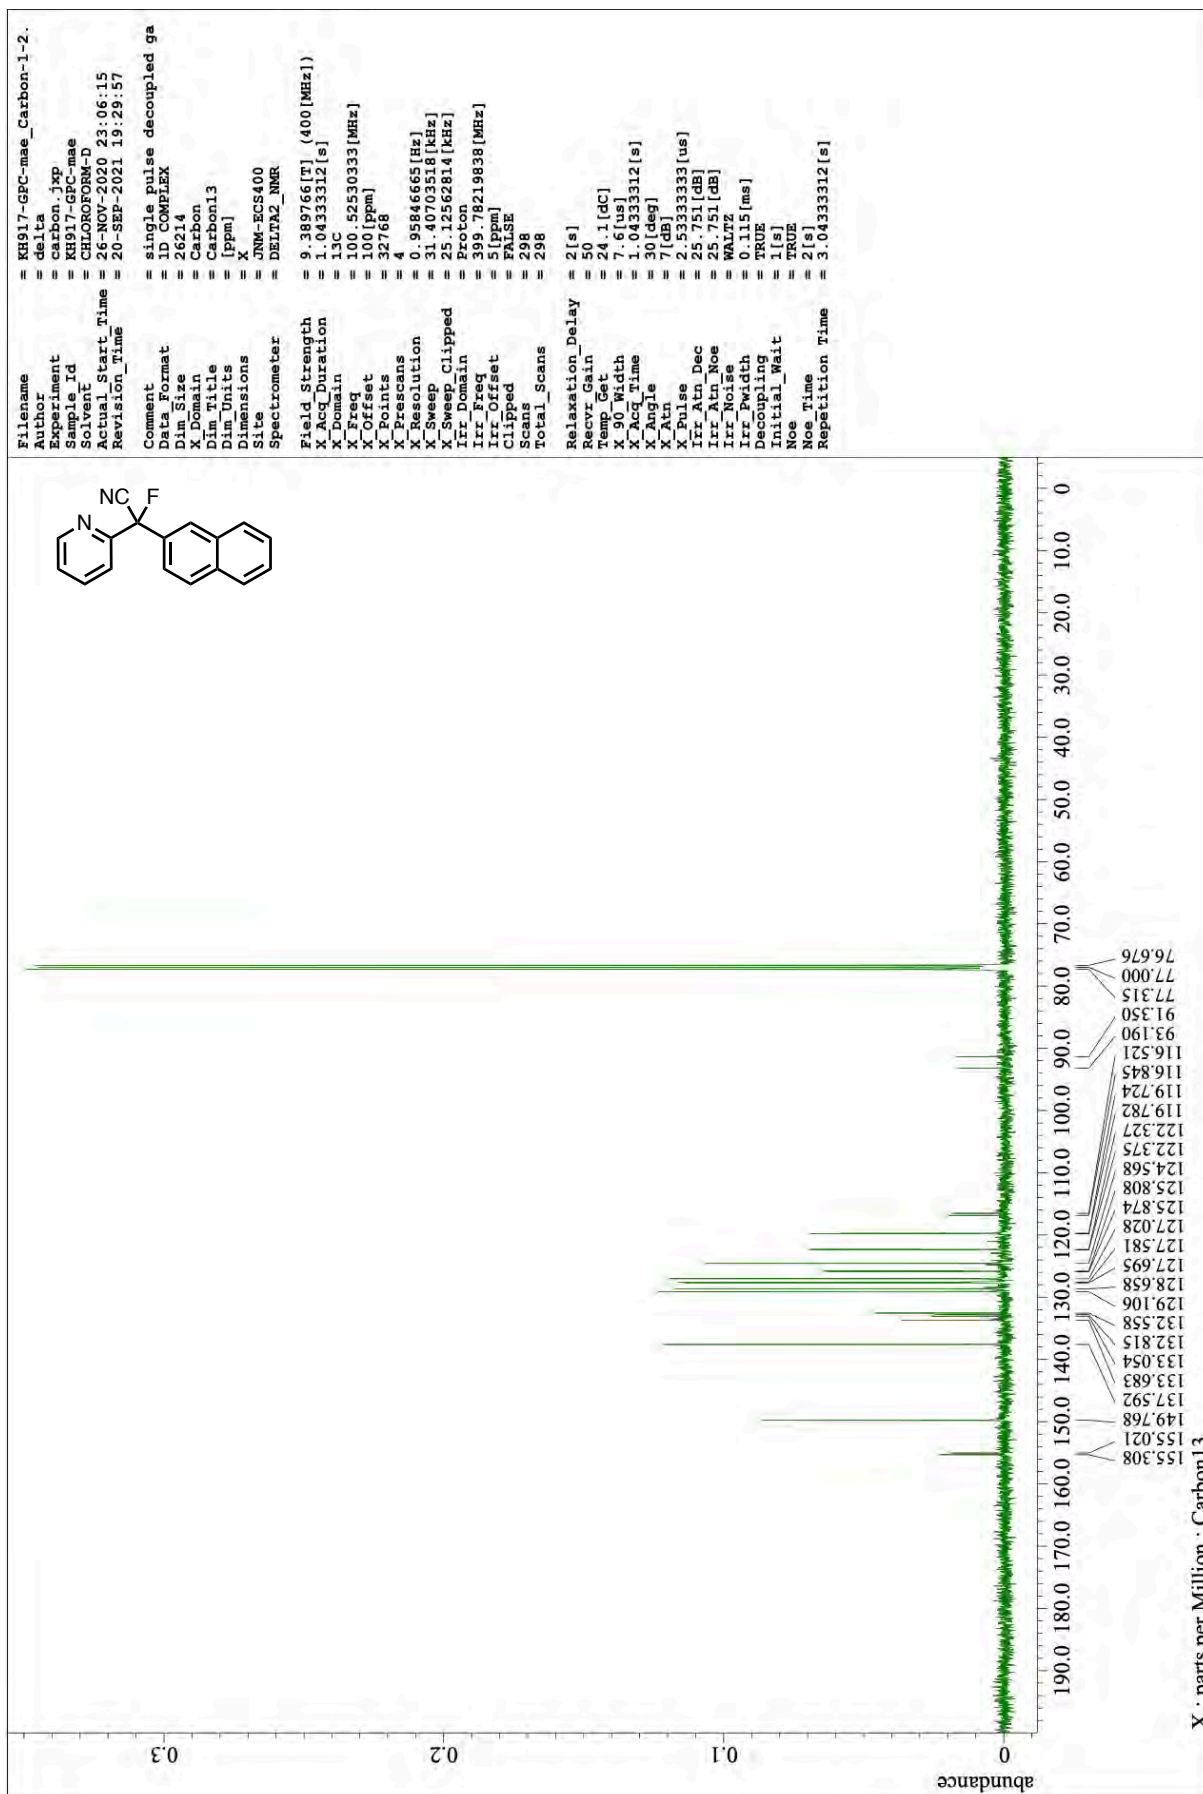

<sup>19</sup>F NMR of 2F (376 MHz, CDCl<sub>3</sub>)

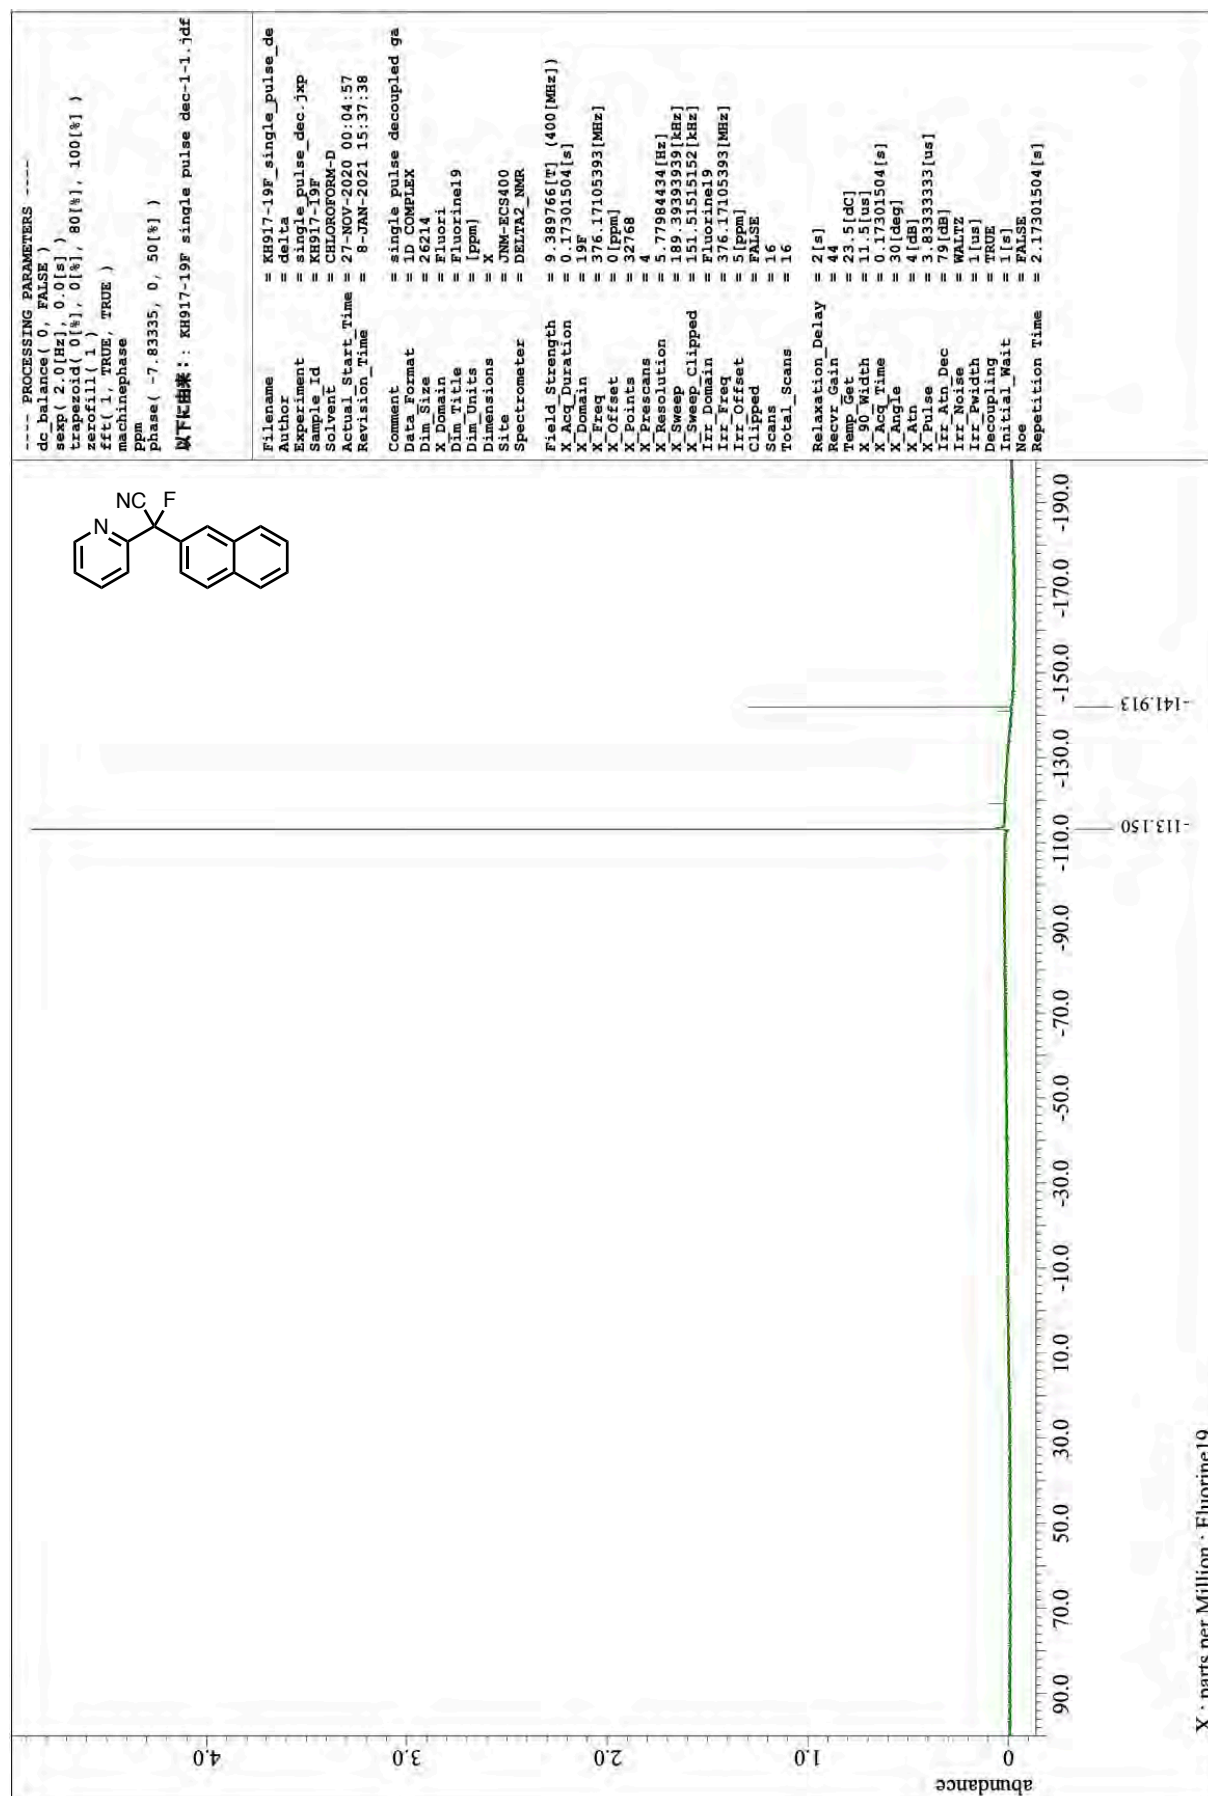

<sup>1</sup>H NMR of 2G (400 MHz, CDCl<sub>3</sub>)

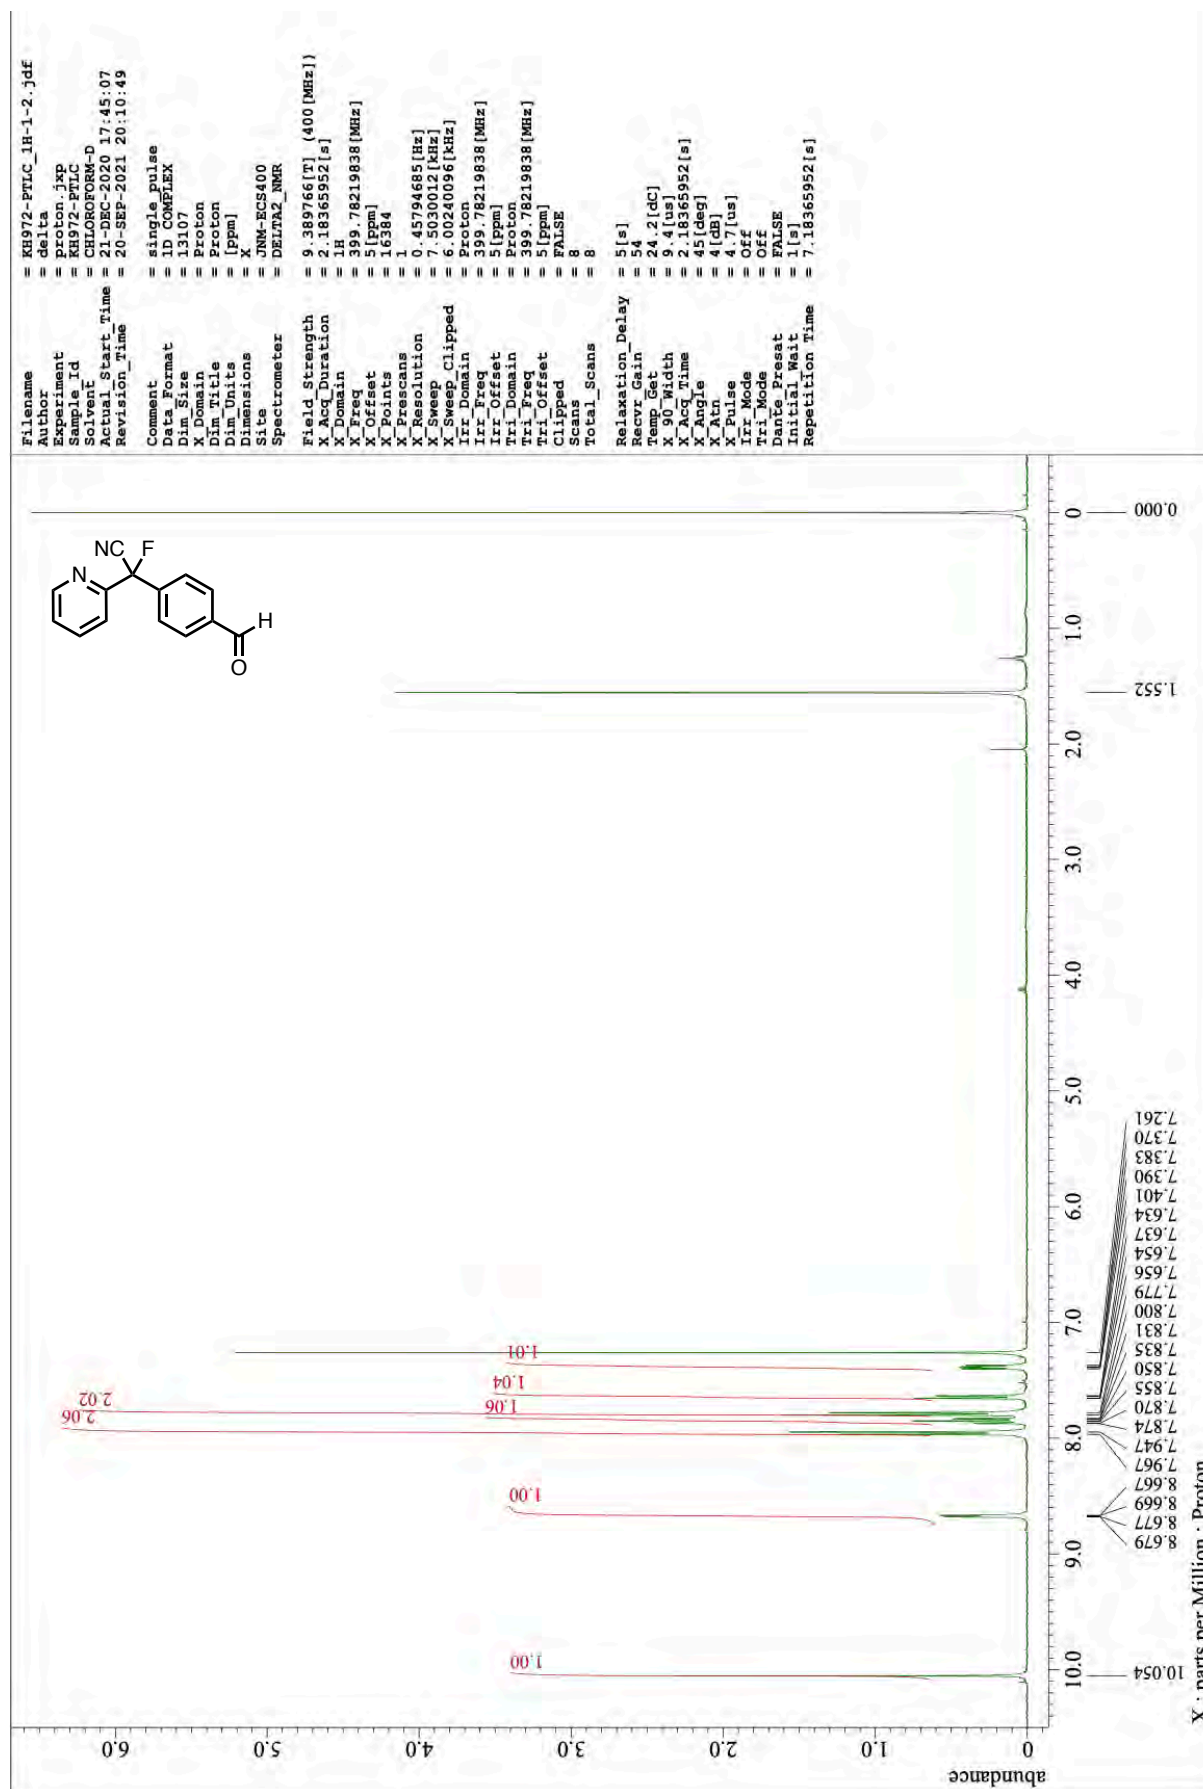

<sup>13</sup>C NMR of 2G (101 MHz, CDCl<sub>3</sub>)

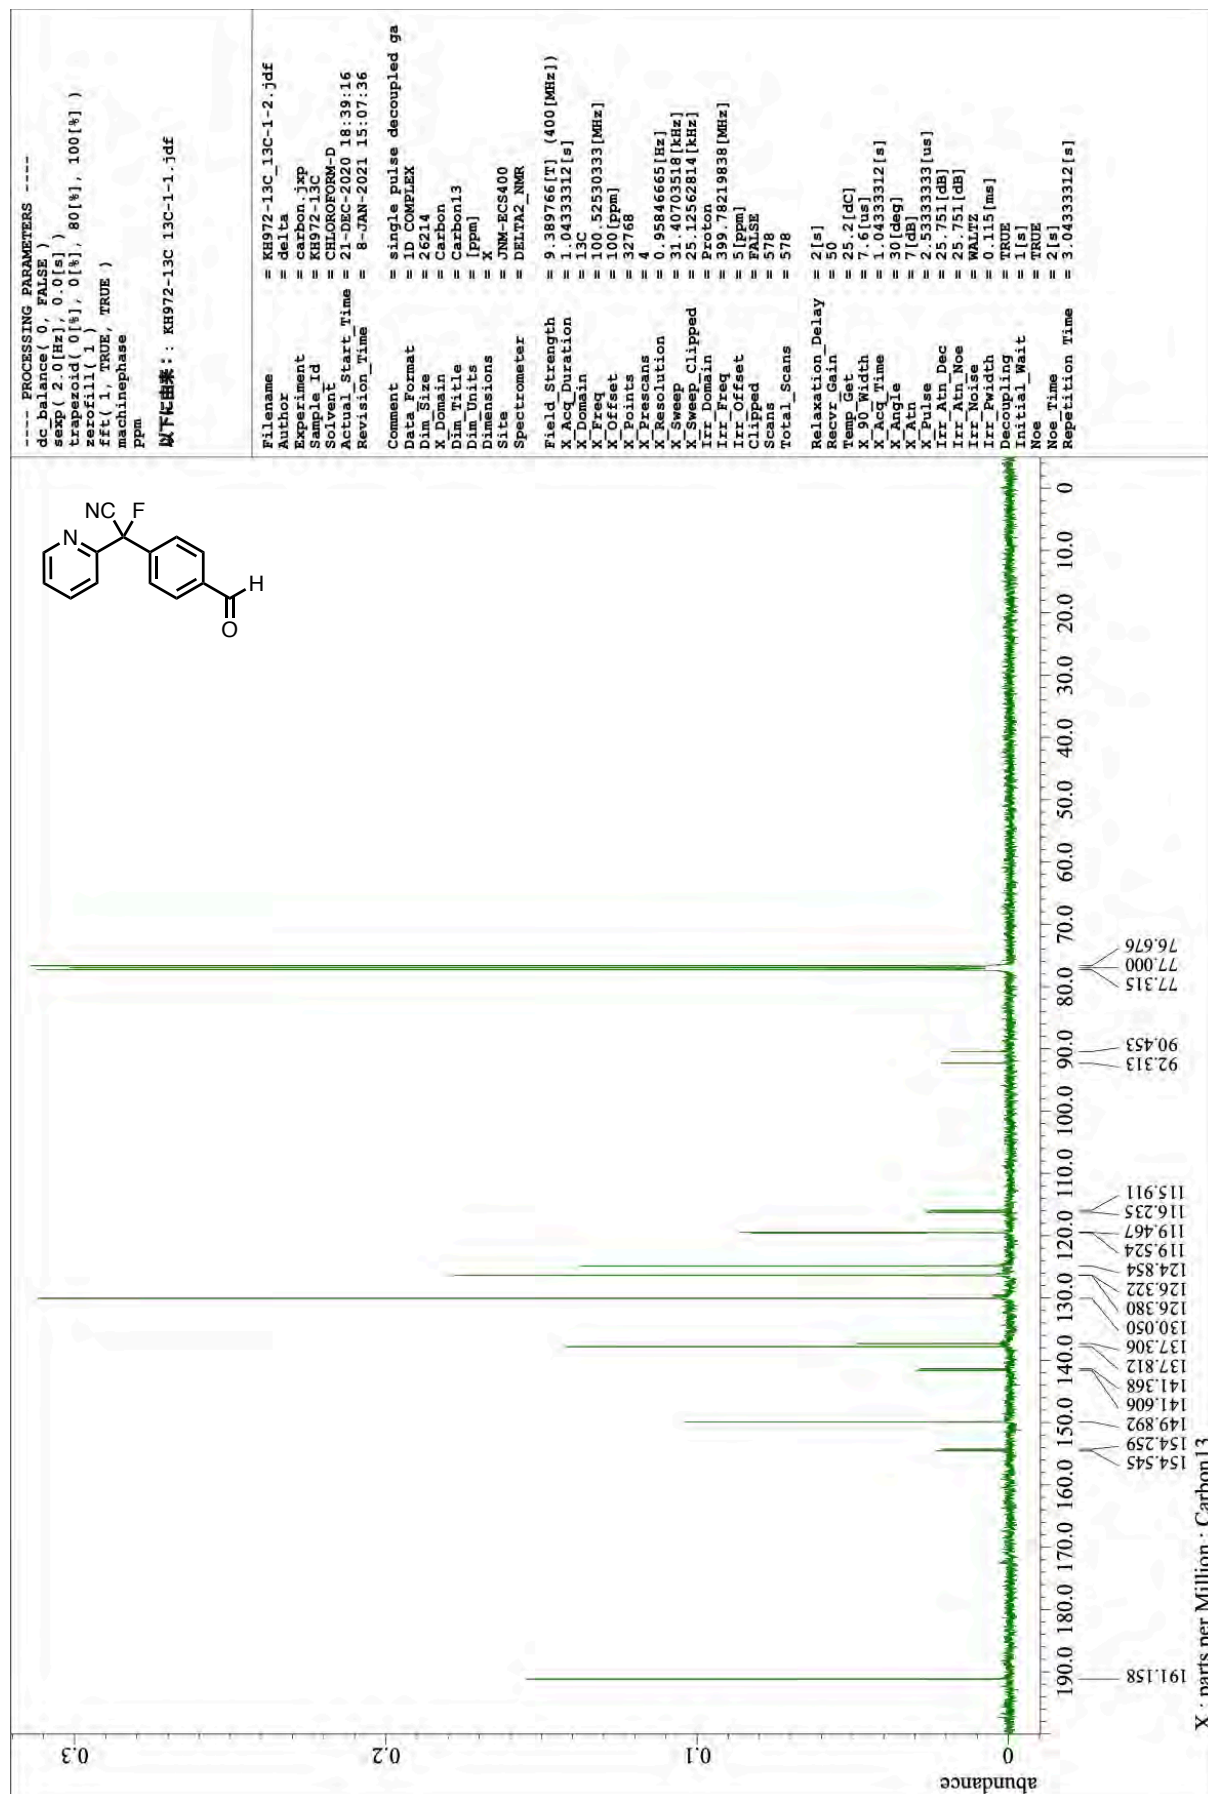

<sup>19</sup>F NMR of 2G (376 MHz, CDCl<sub>3</sub>)

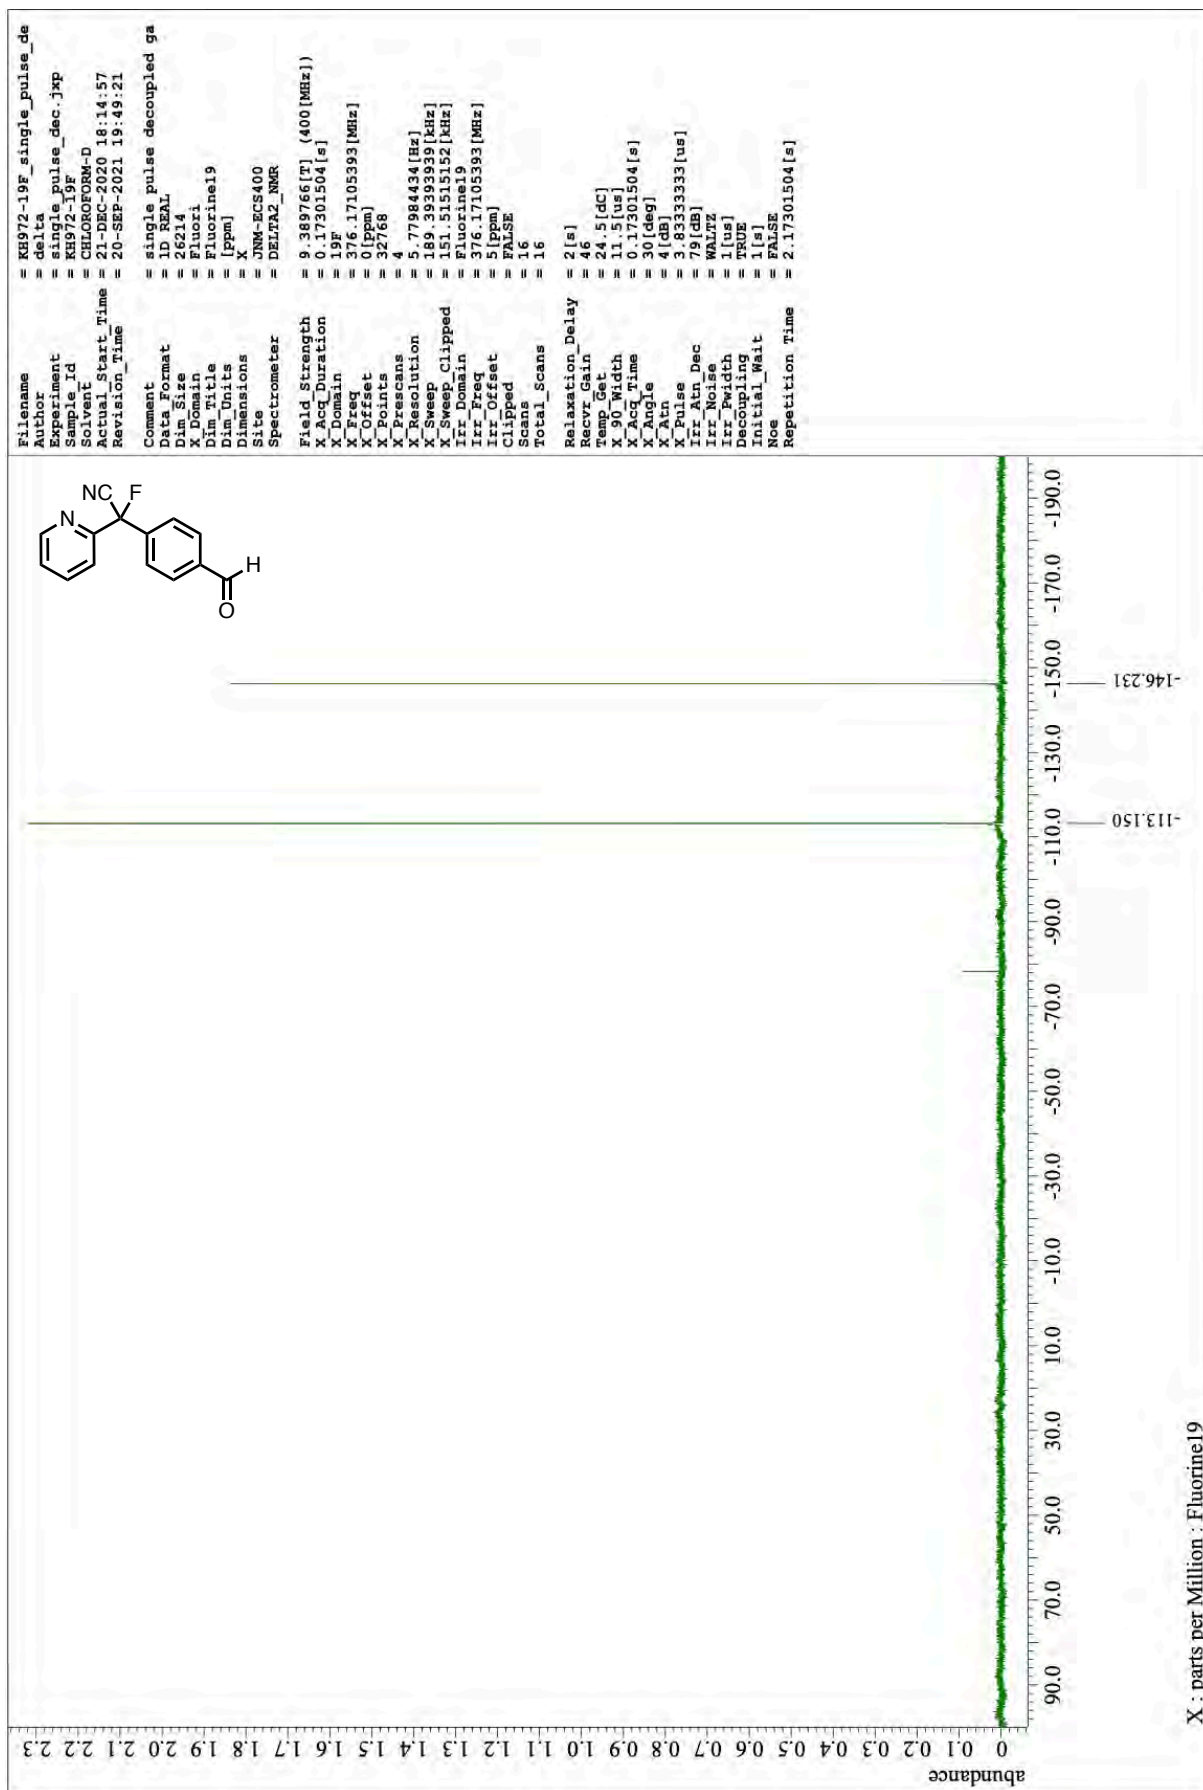

<sup>1</sup>H NMR of 2H (400 MHz, CDCl<sub>3</sub>)

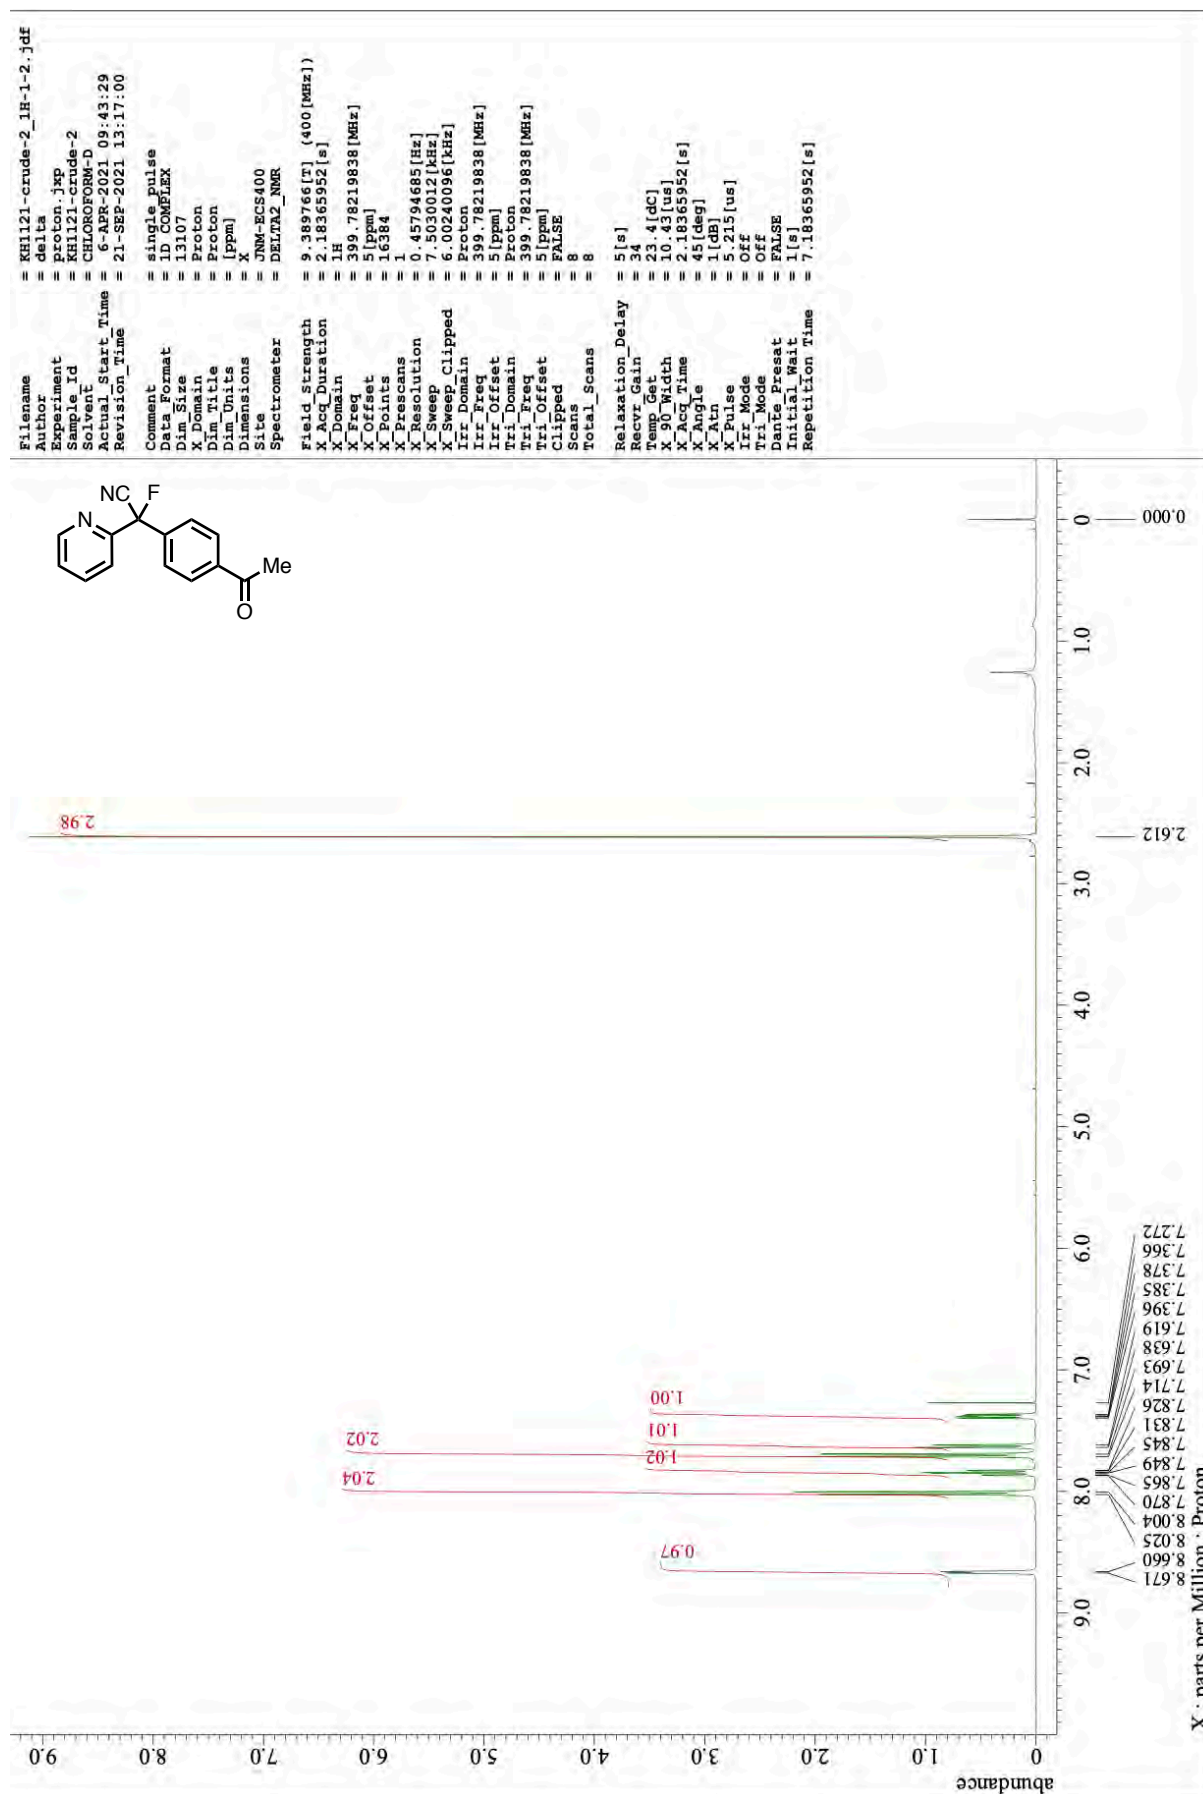

<sup>13</sup>C NMR of 2H (101 MHz, CDCl<sub>3</sub>)

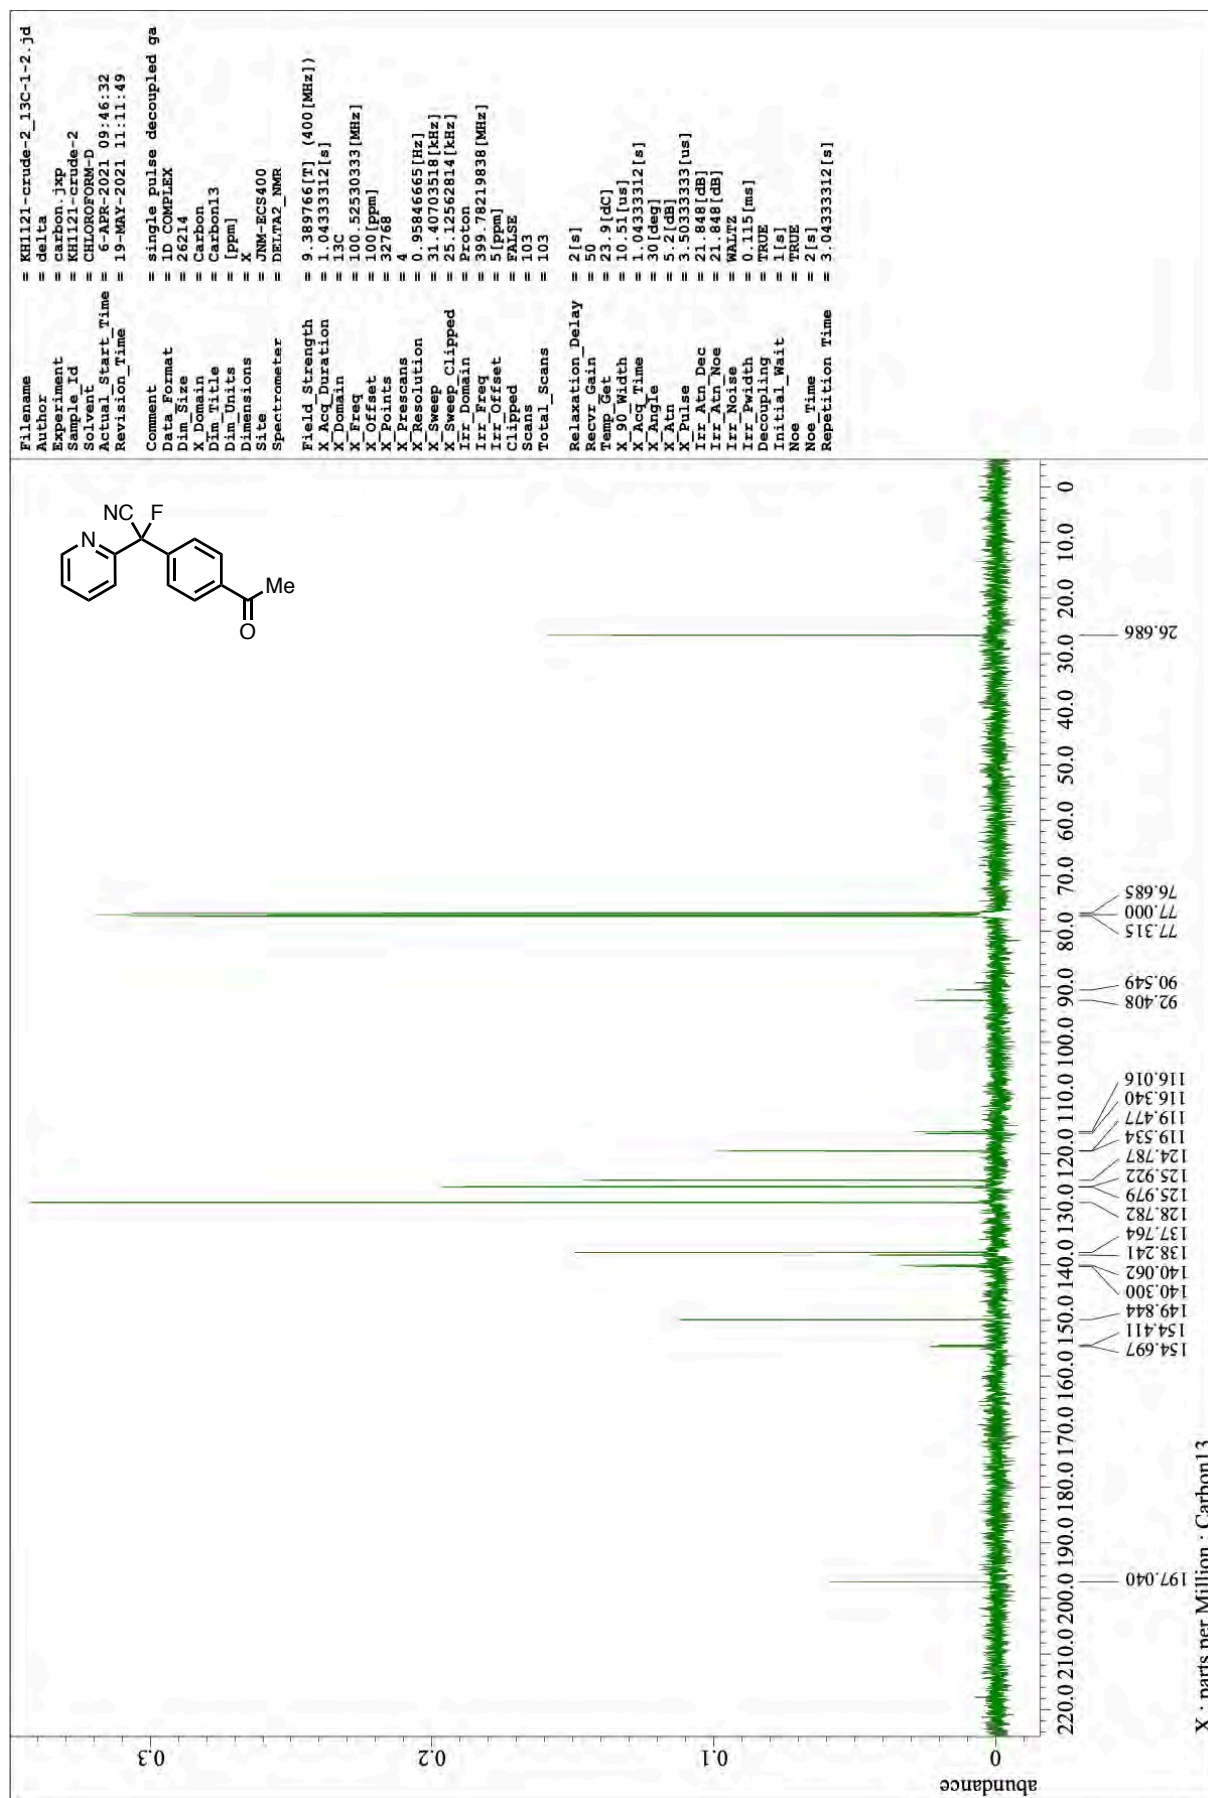



<sup>19</sup>F NMR of 2H (376 MHz, CDCl<sub>3</sub>)

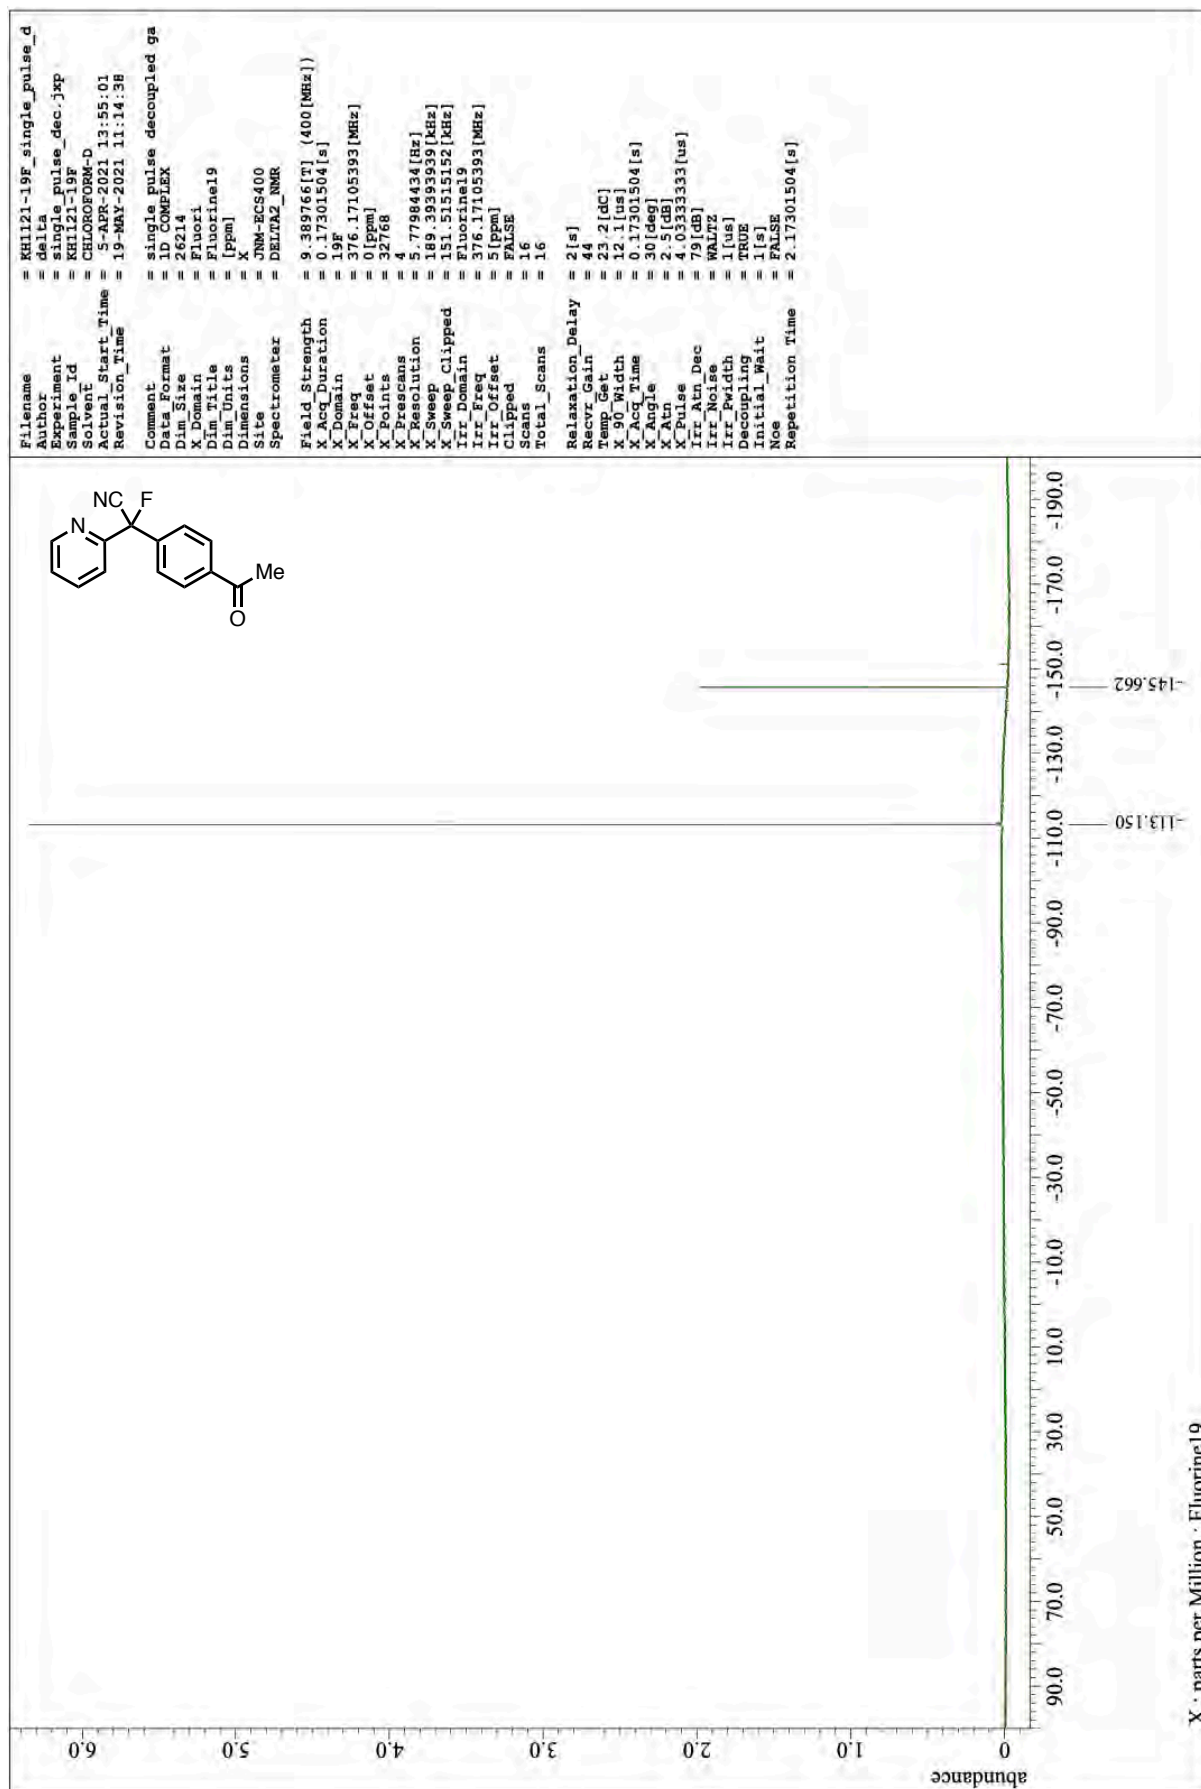

<sup>1</sup>H NMR of **2I** (400 MHz, CDCl<sub>3</sub>)

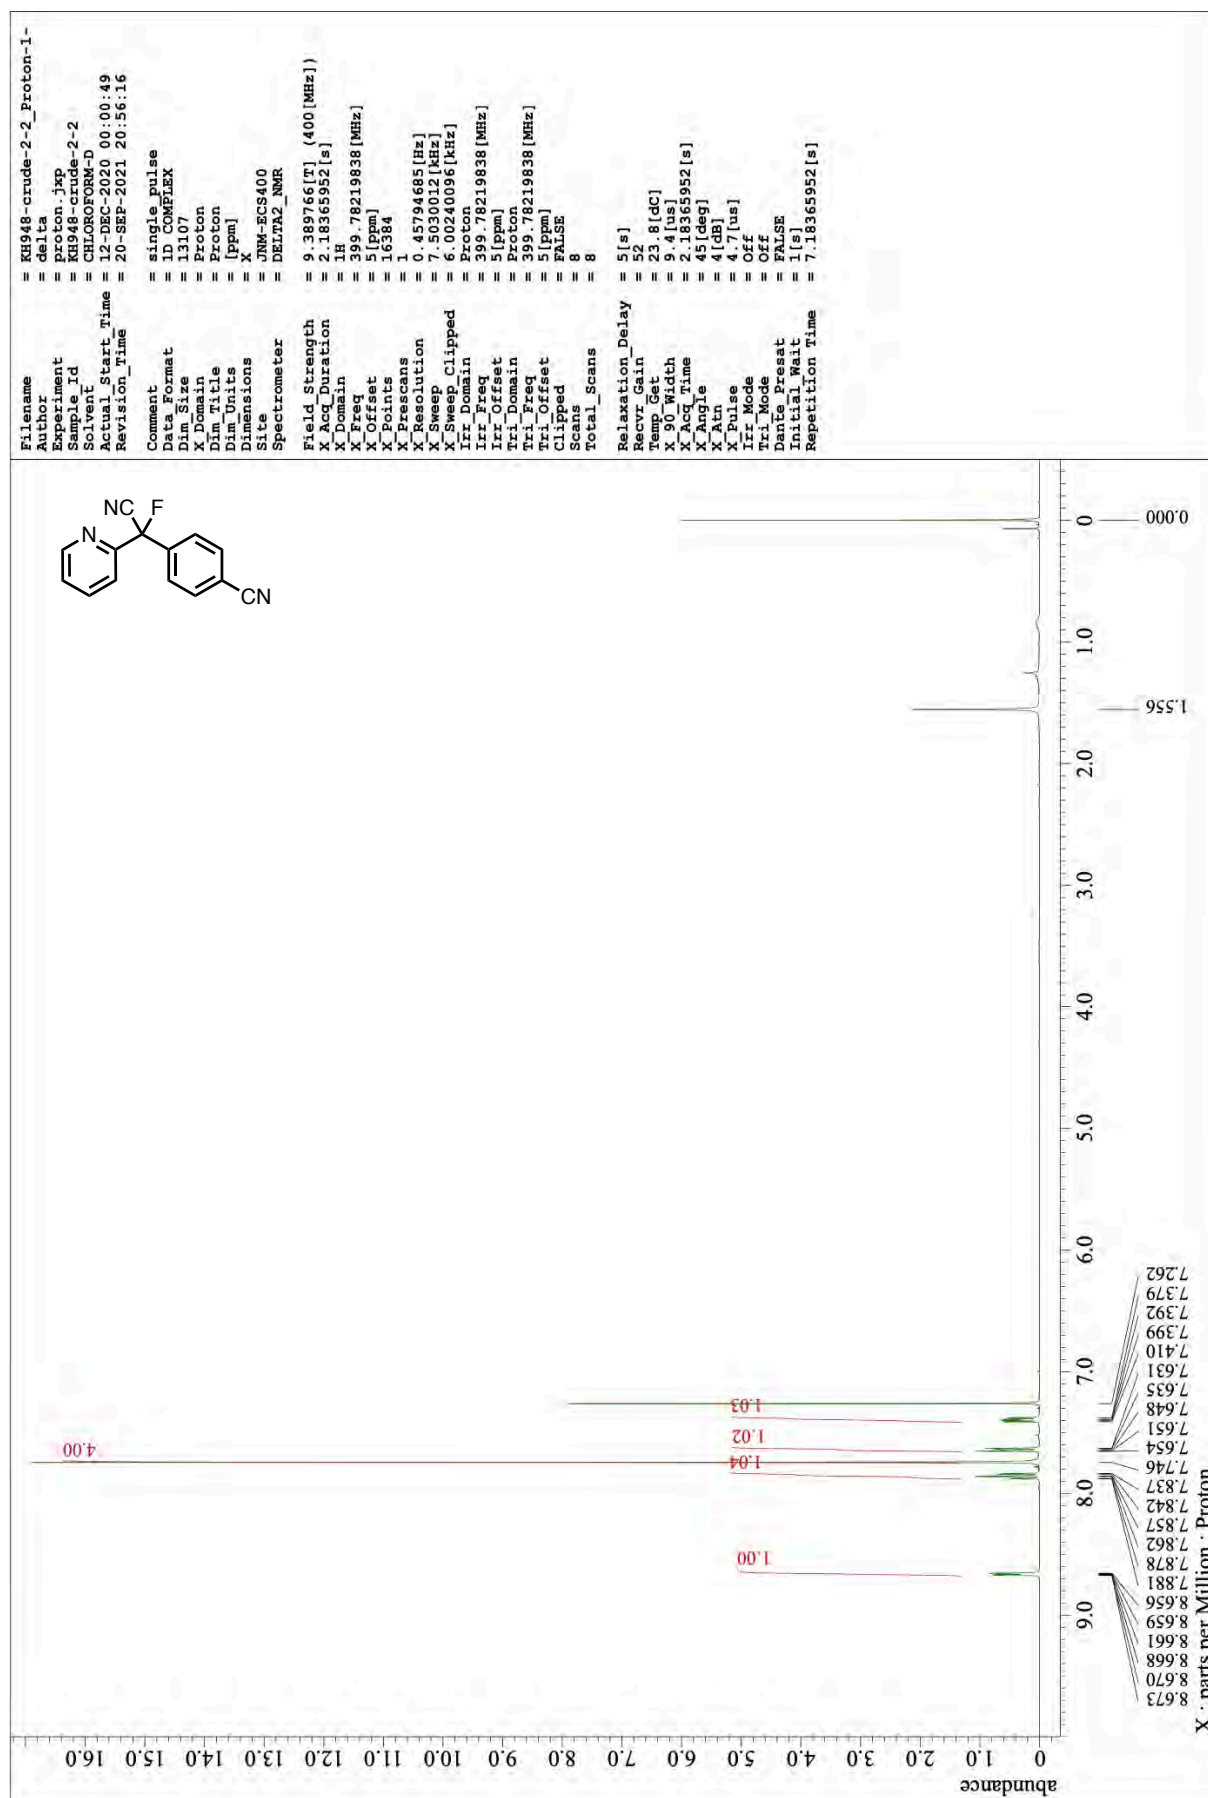

<sup>13</sup>C NMR of 2I (101 MHz, CDCl<sub>3</sub>)

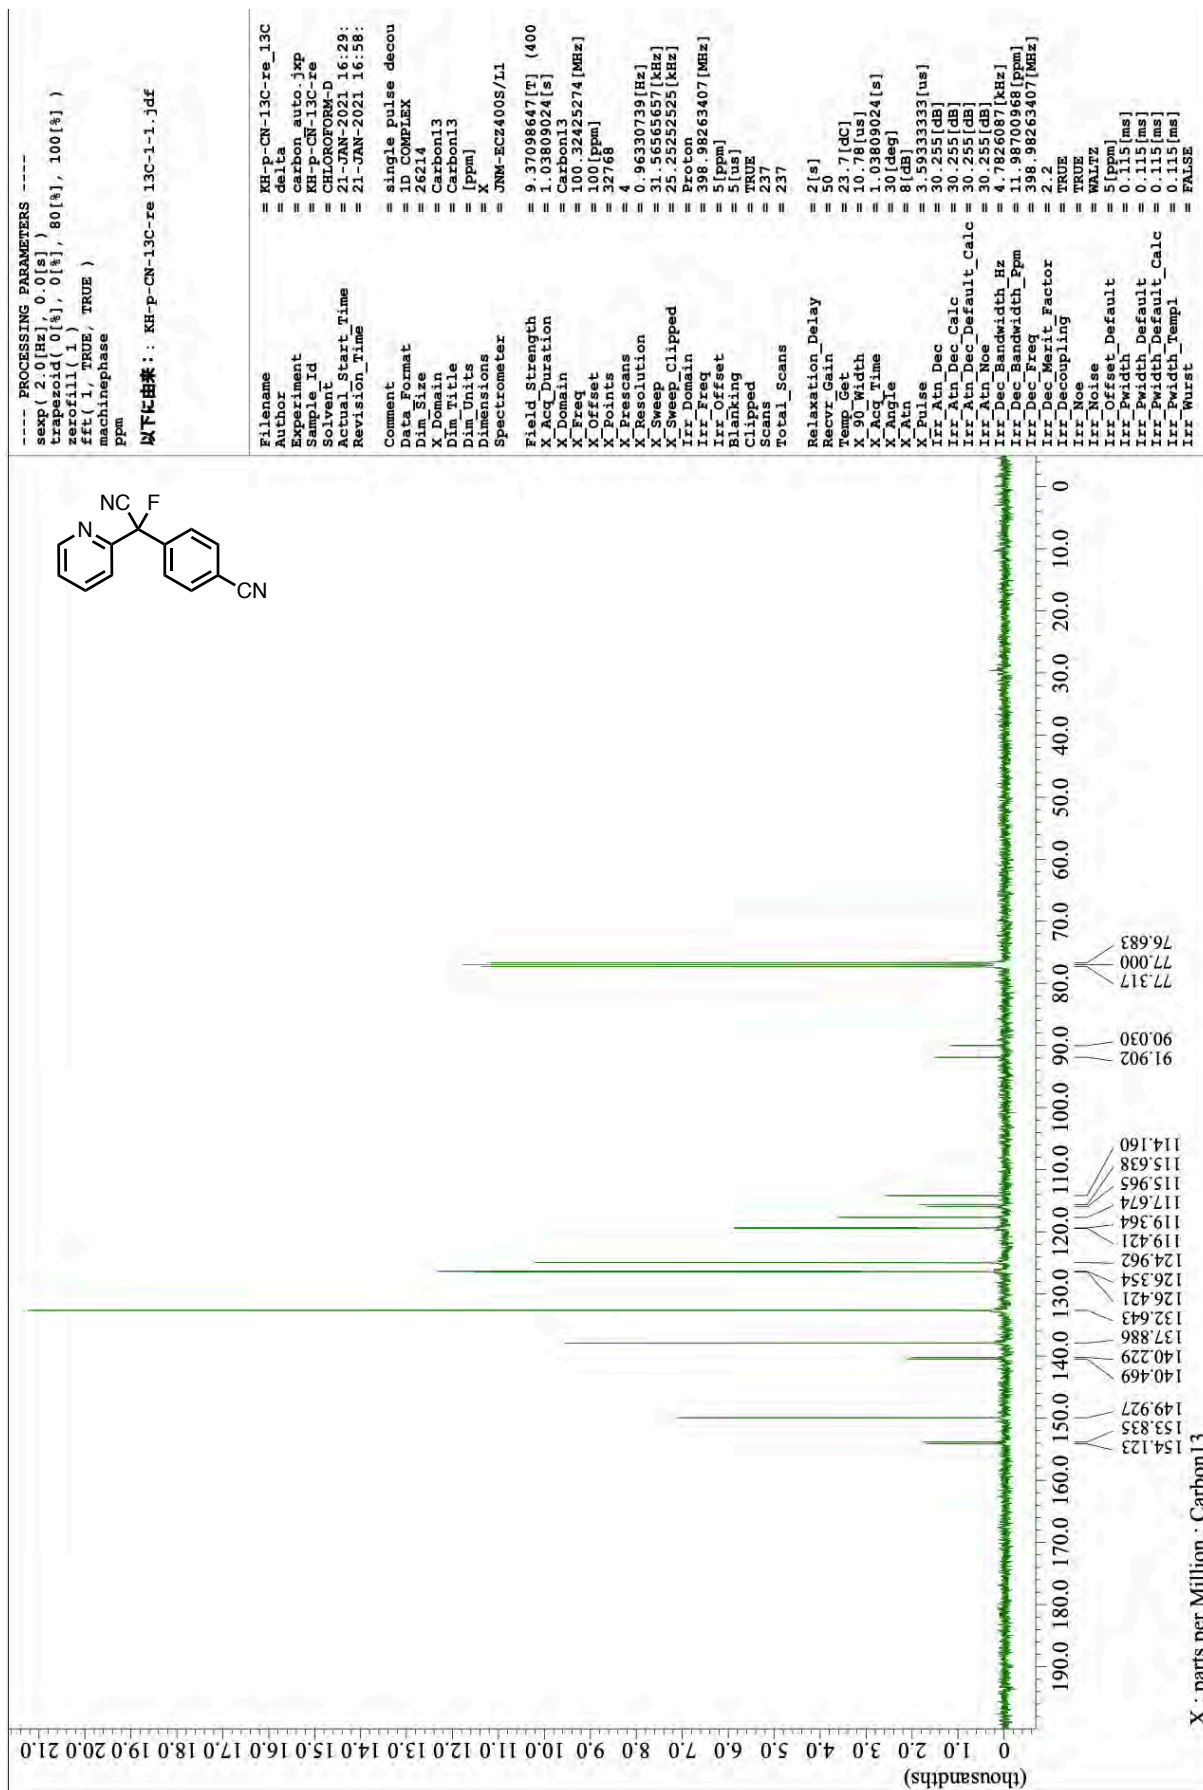

<sup>19</sup>F NMR of 2I (376 MHz, CDCl<sub>3</sub>)

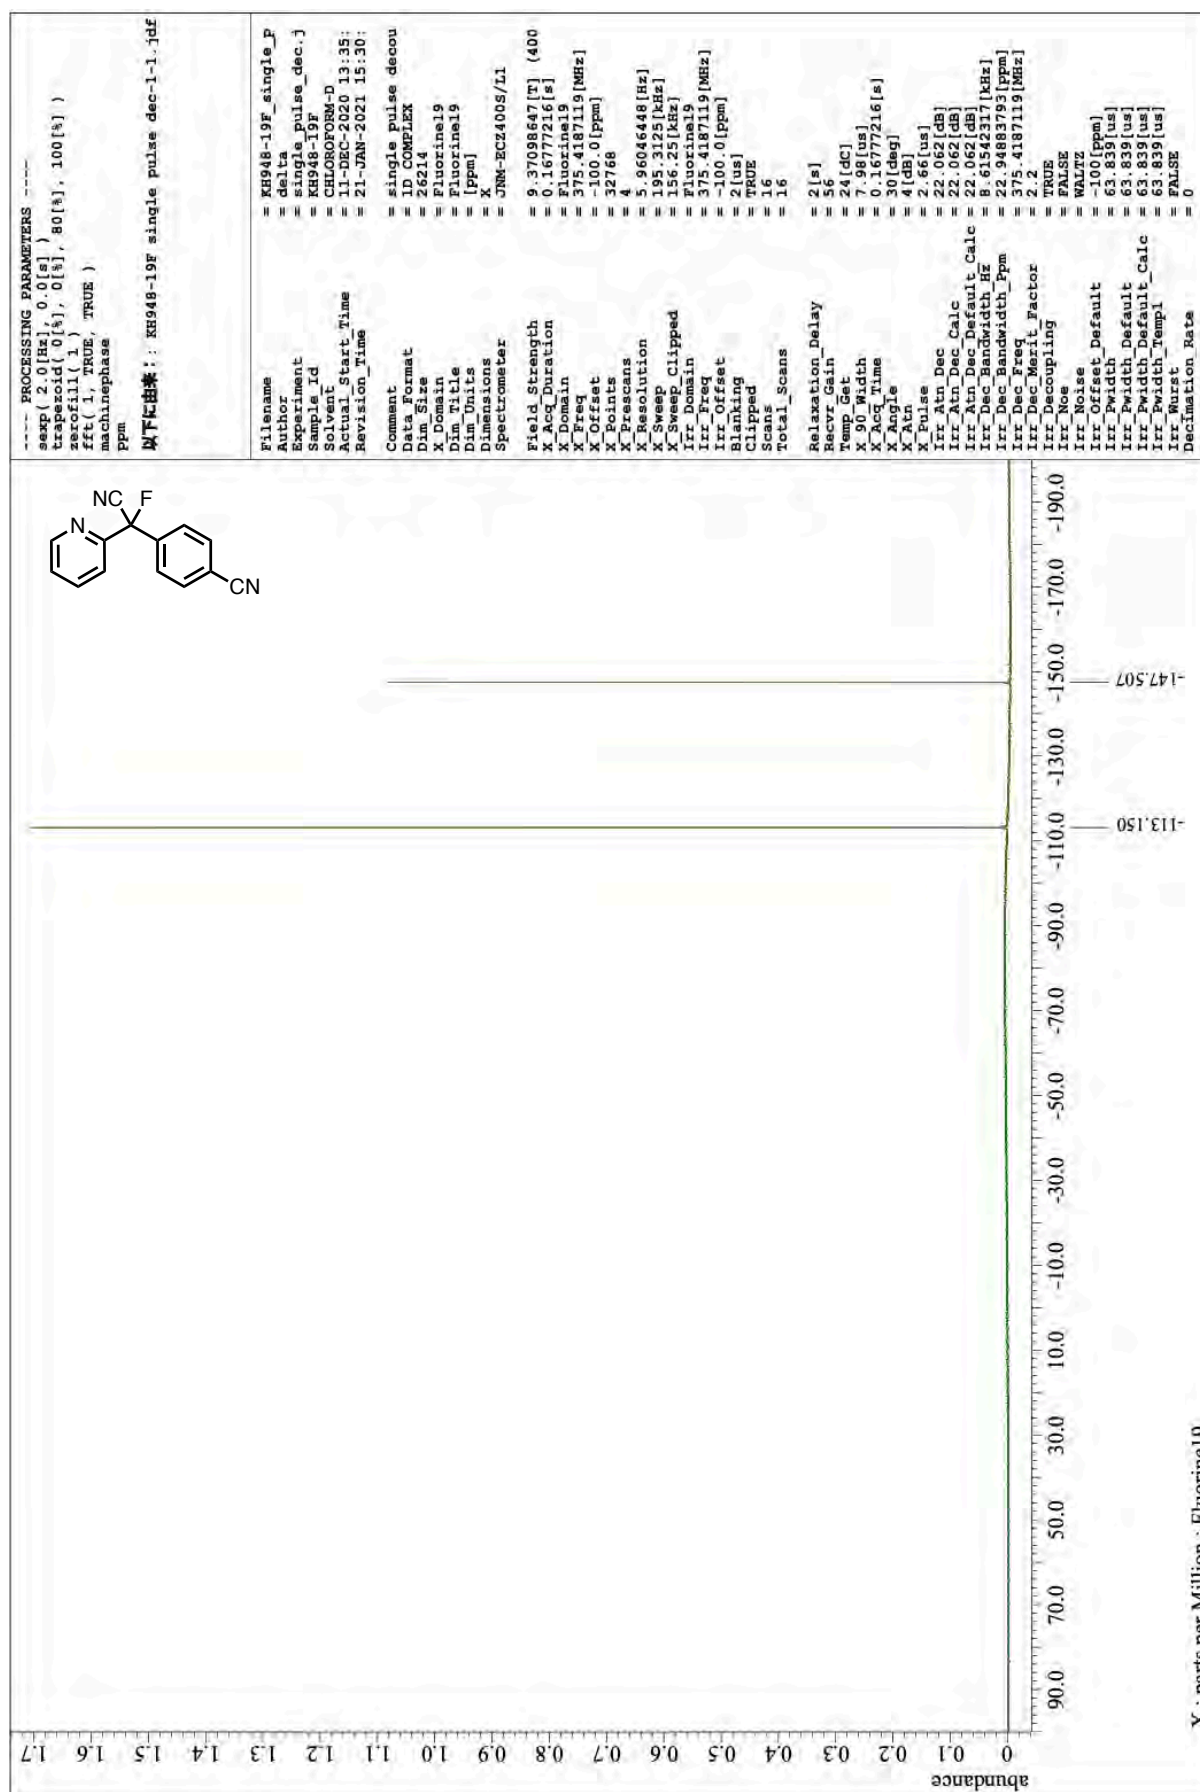

<sup>1</sup>H NMR of 2J (400 MHz, CDCl<sub>3</sub>)

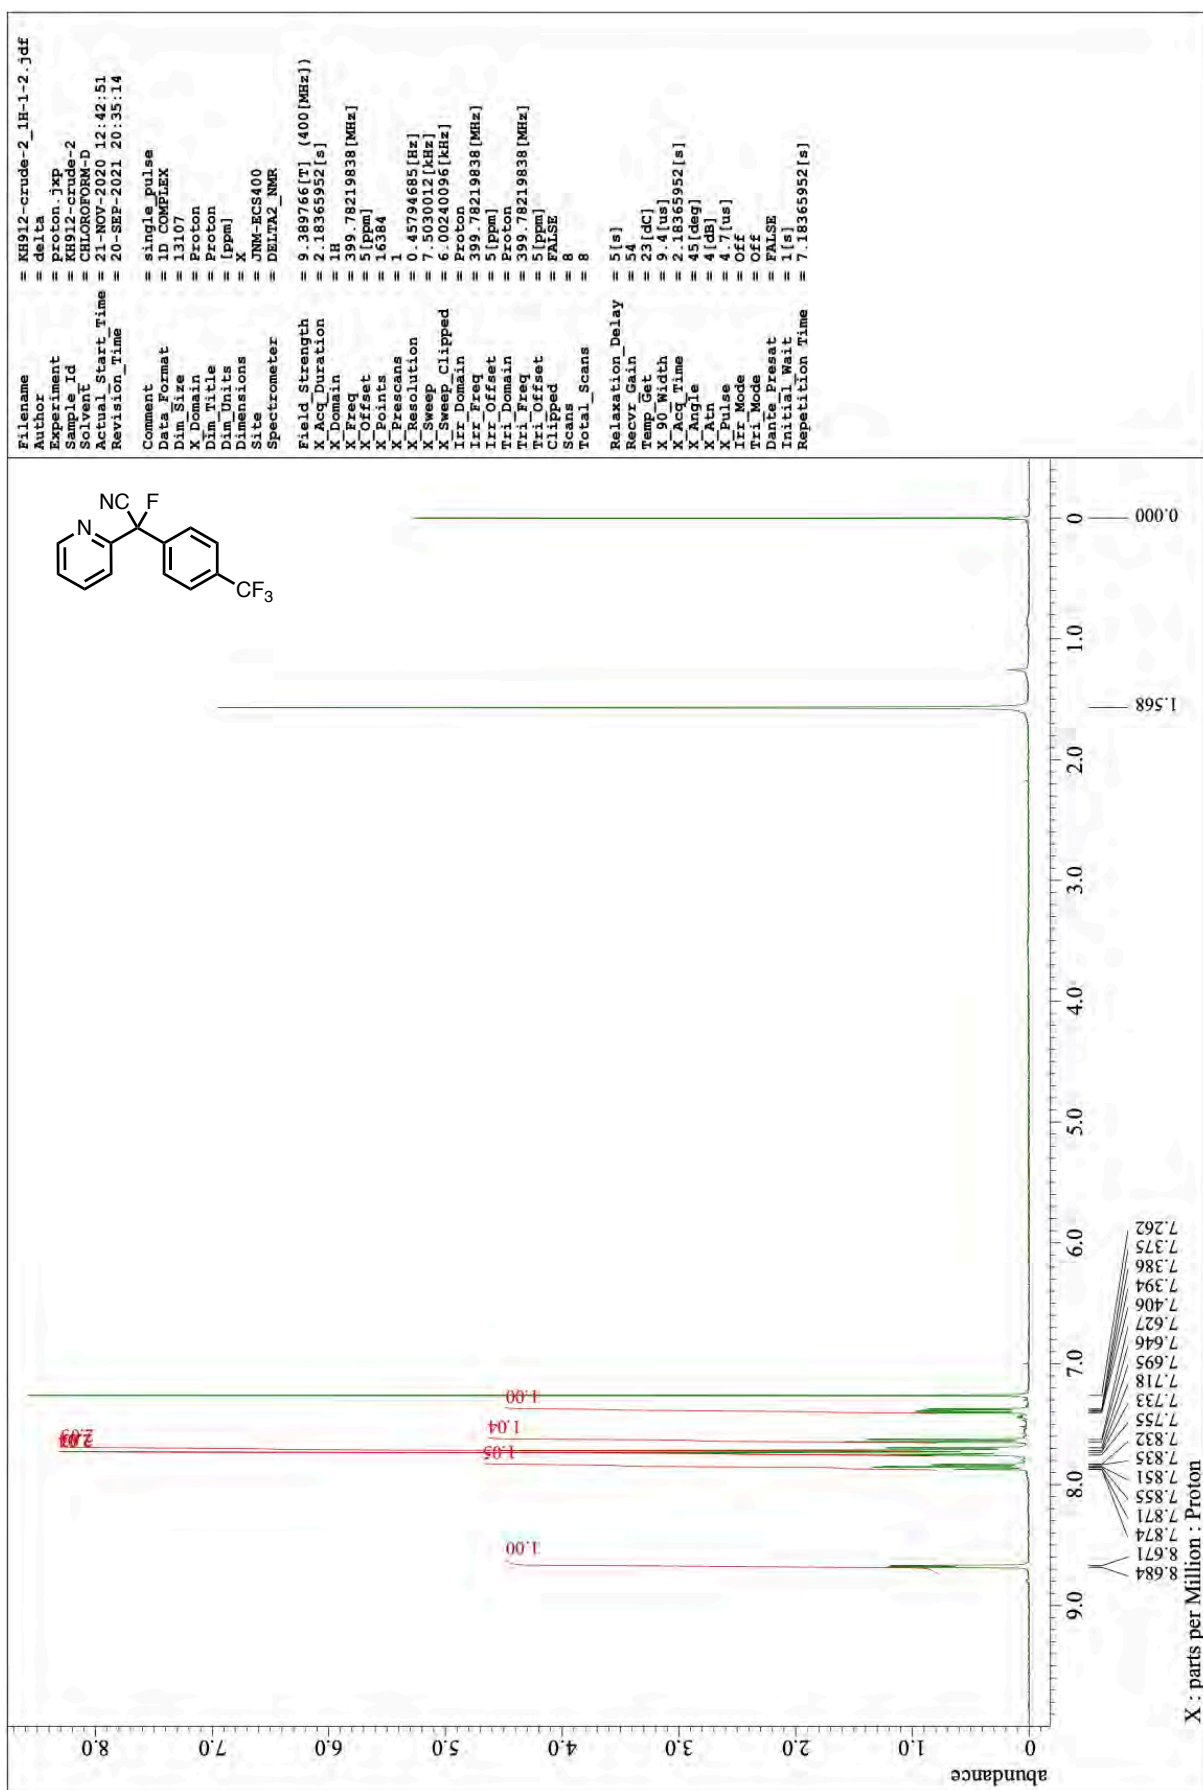

<sup>13</sup>C NMR of 2J (101 MHz, CDCl<sub>3</sub>)

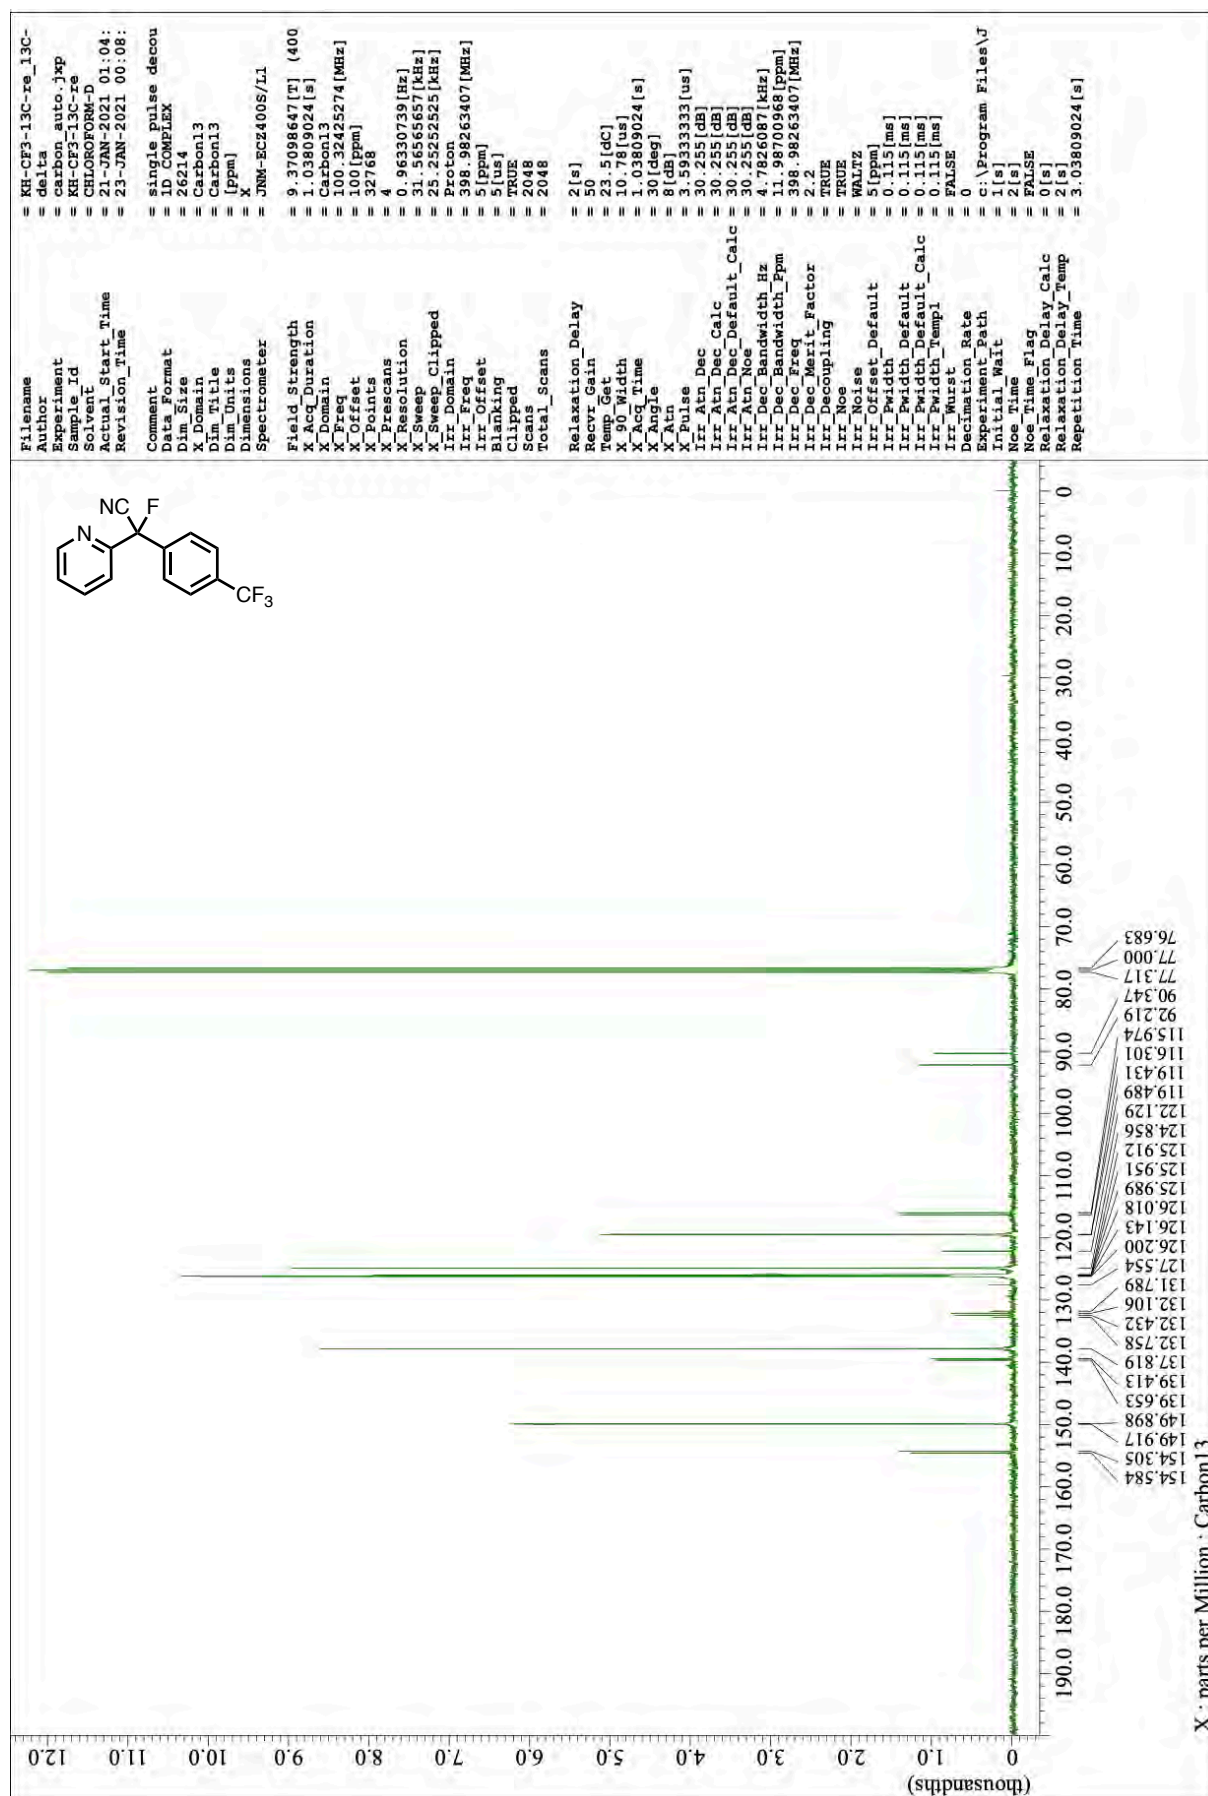

<sup>19</sup>F NMR of 2J (376 MHz, CDCl<sub>3</sub>)

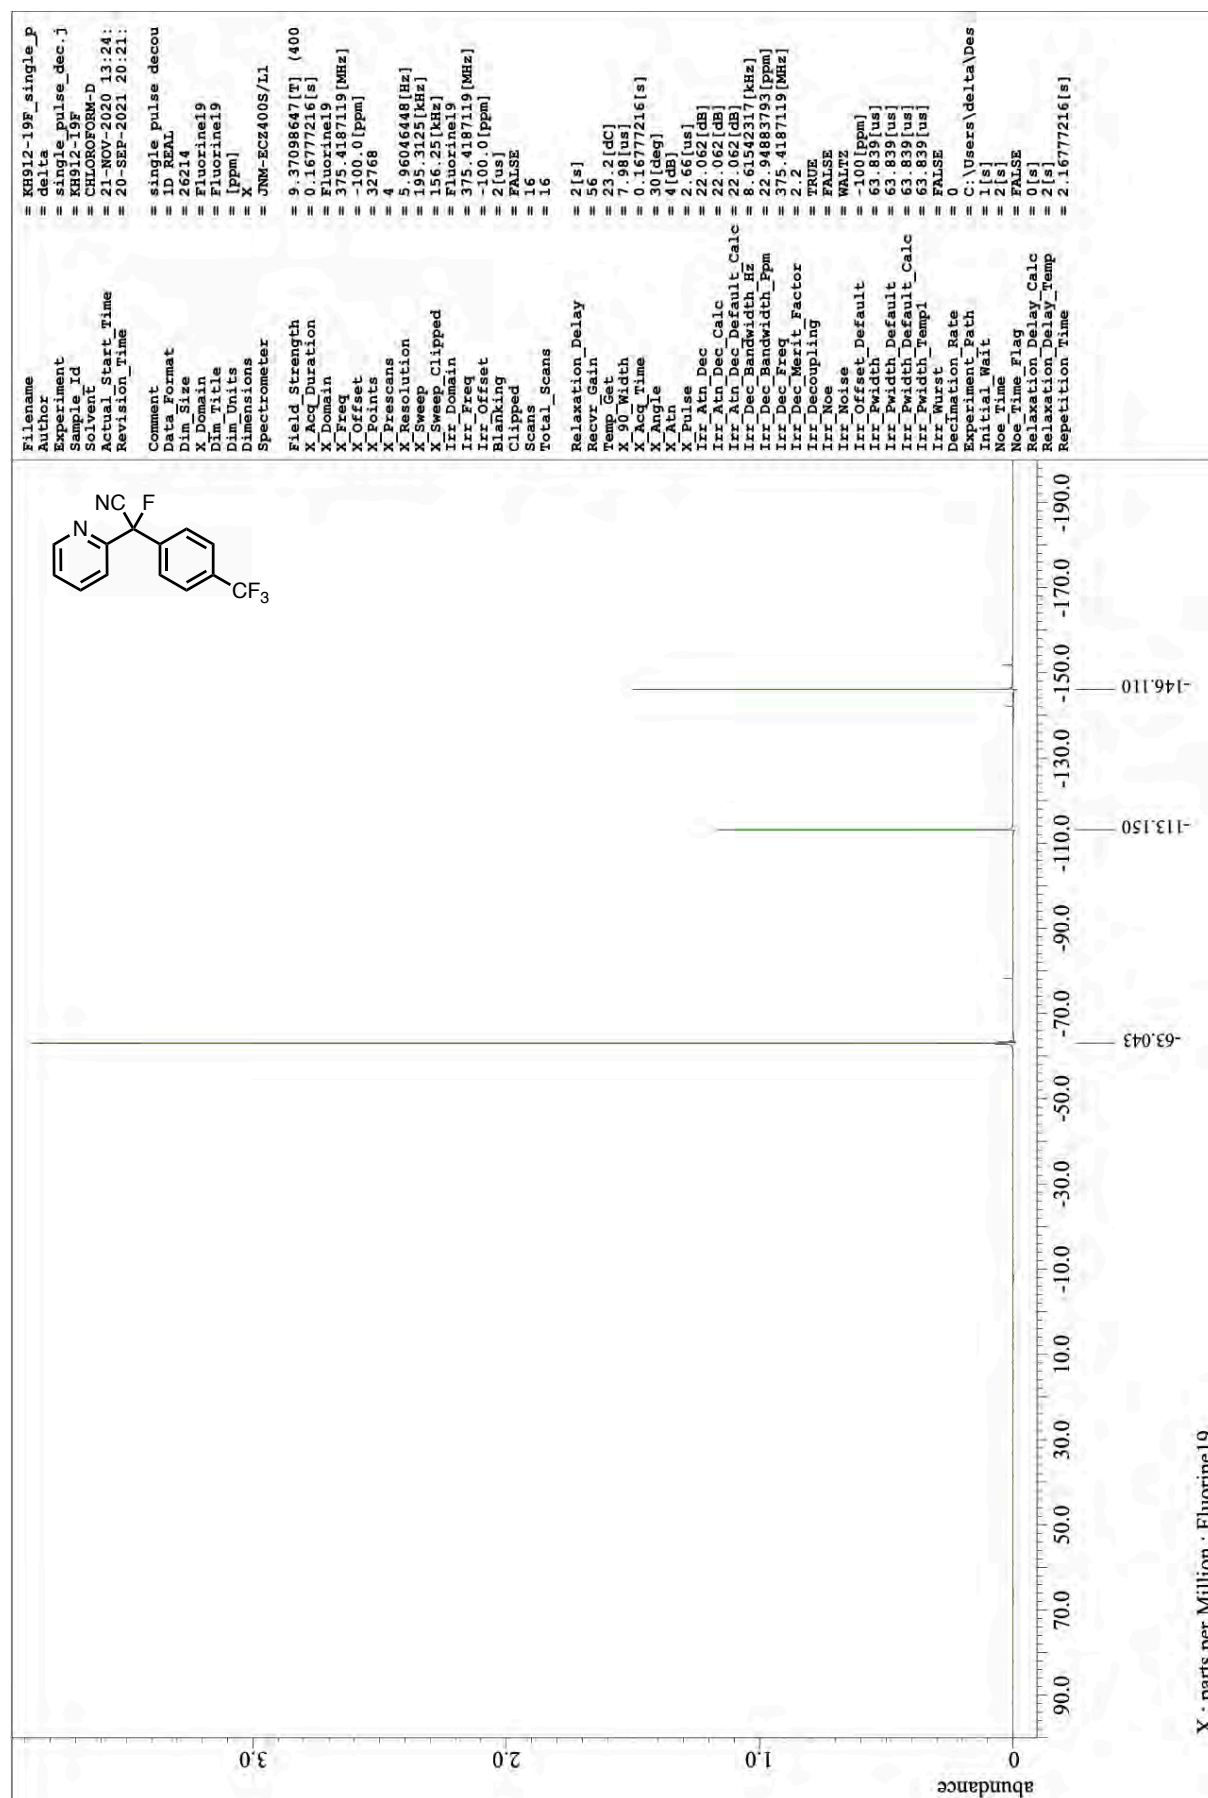

<sup>1</sup>H NMR of 2K (400 MHz, CDCl<sub>3</sub>)

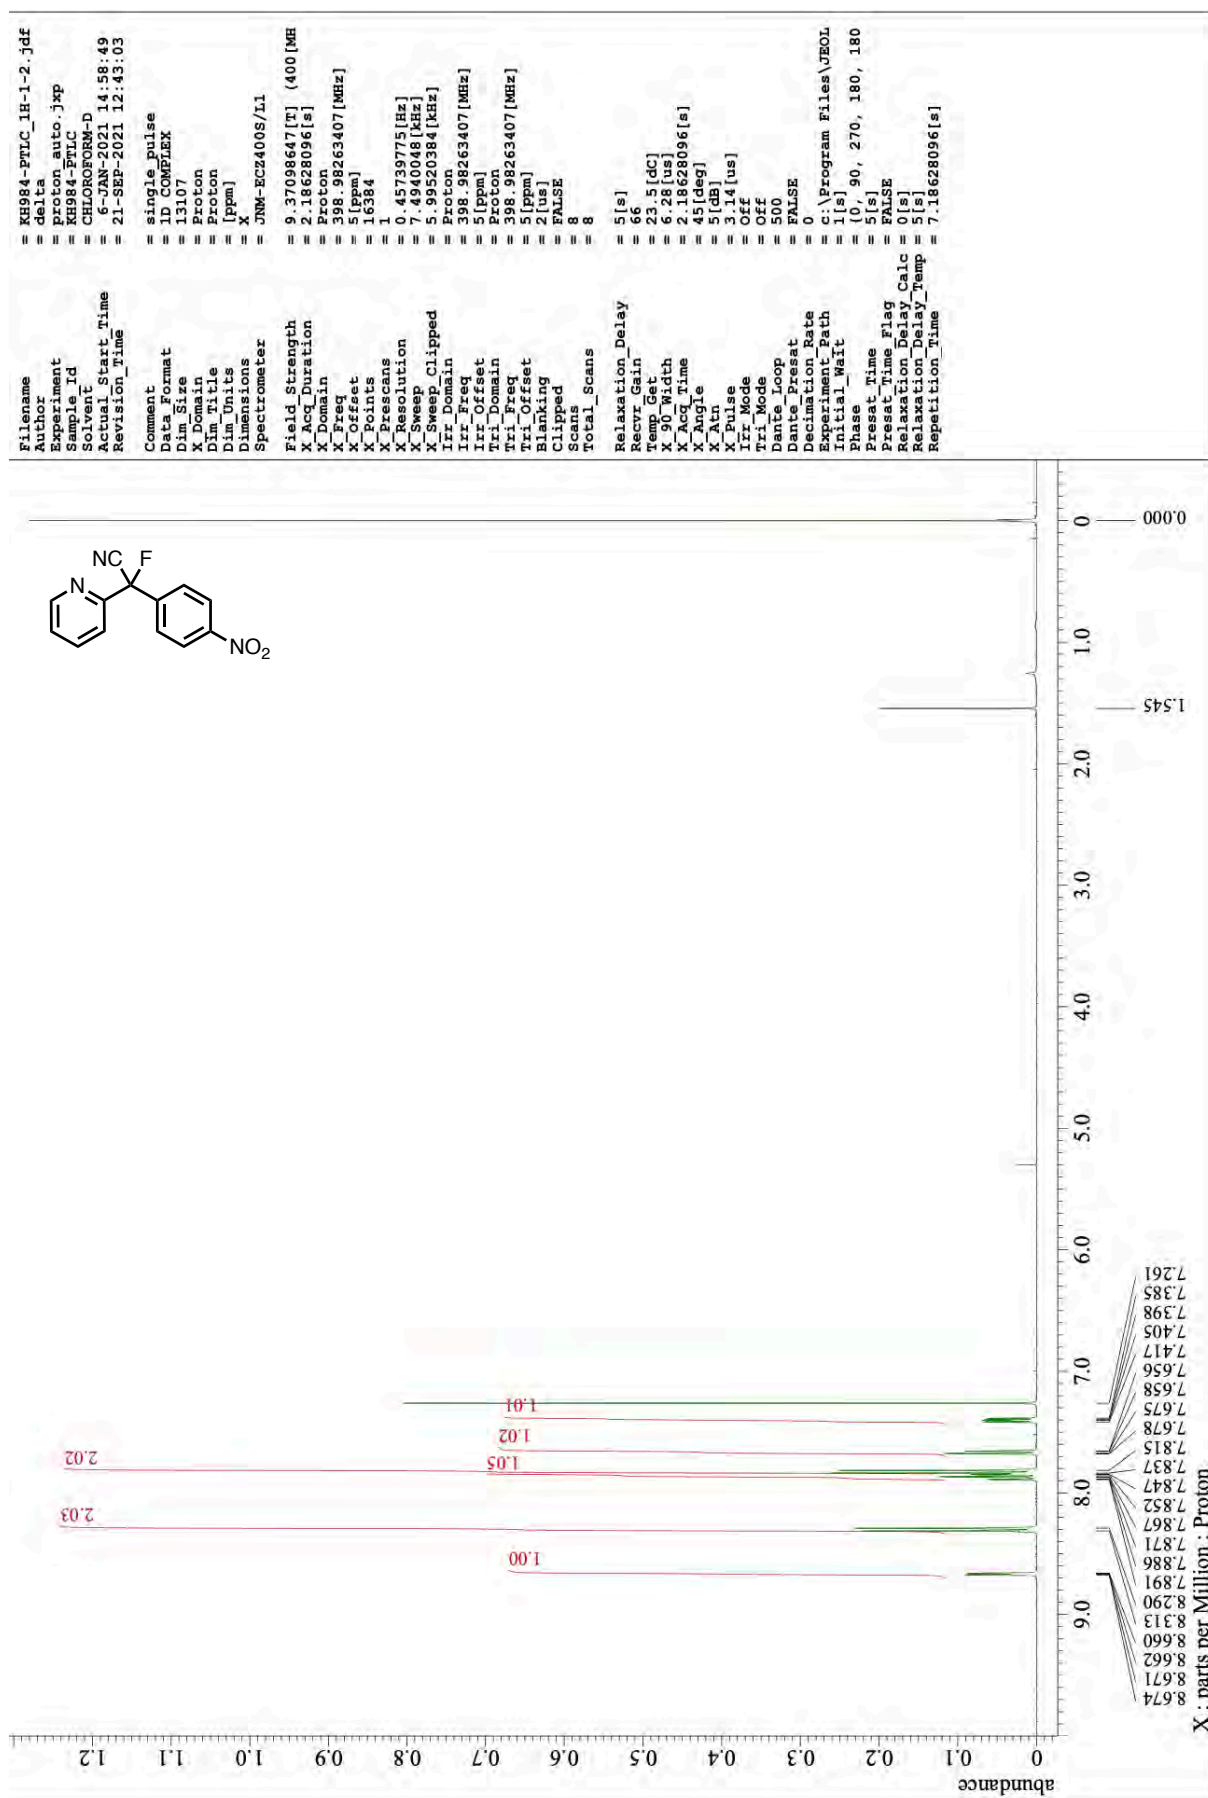



<sup>13</sup>C NMR of 2K (101 MHz, CDCl<sub>3</sub>)

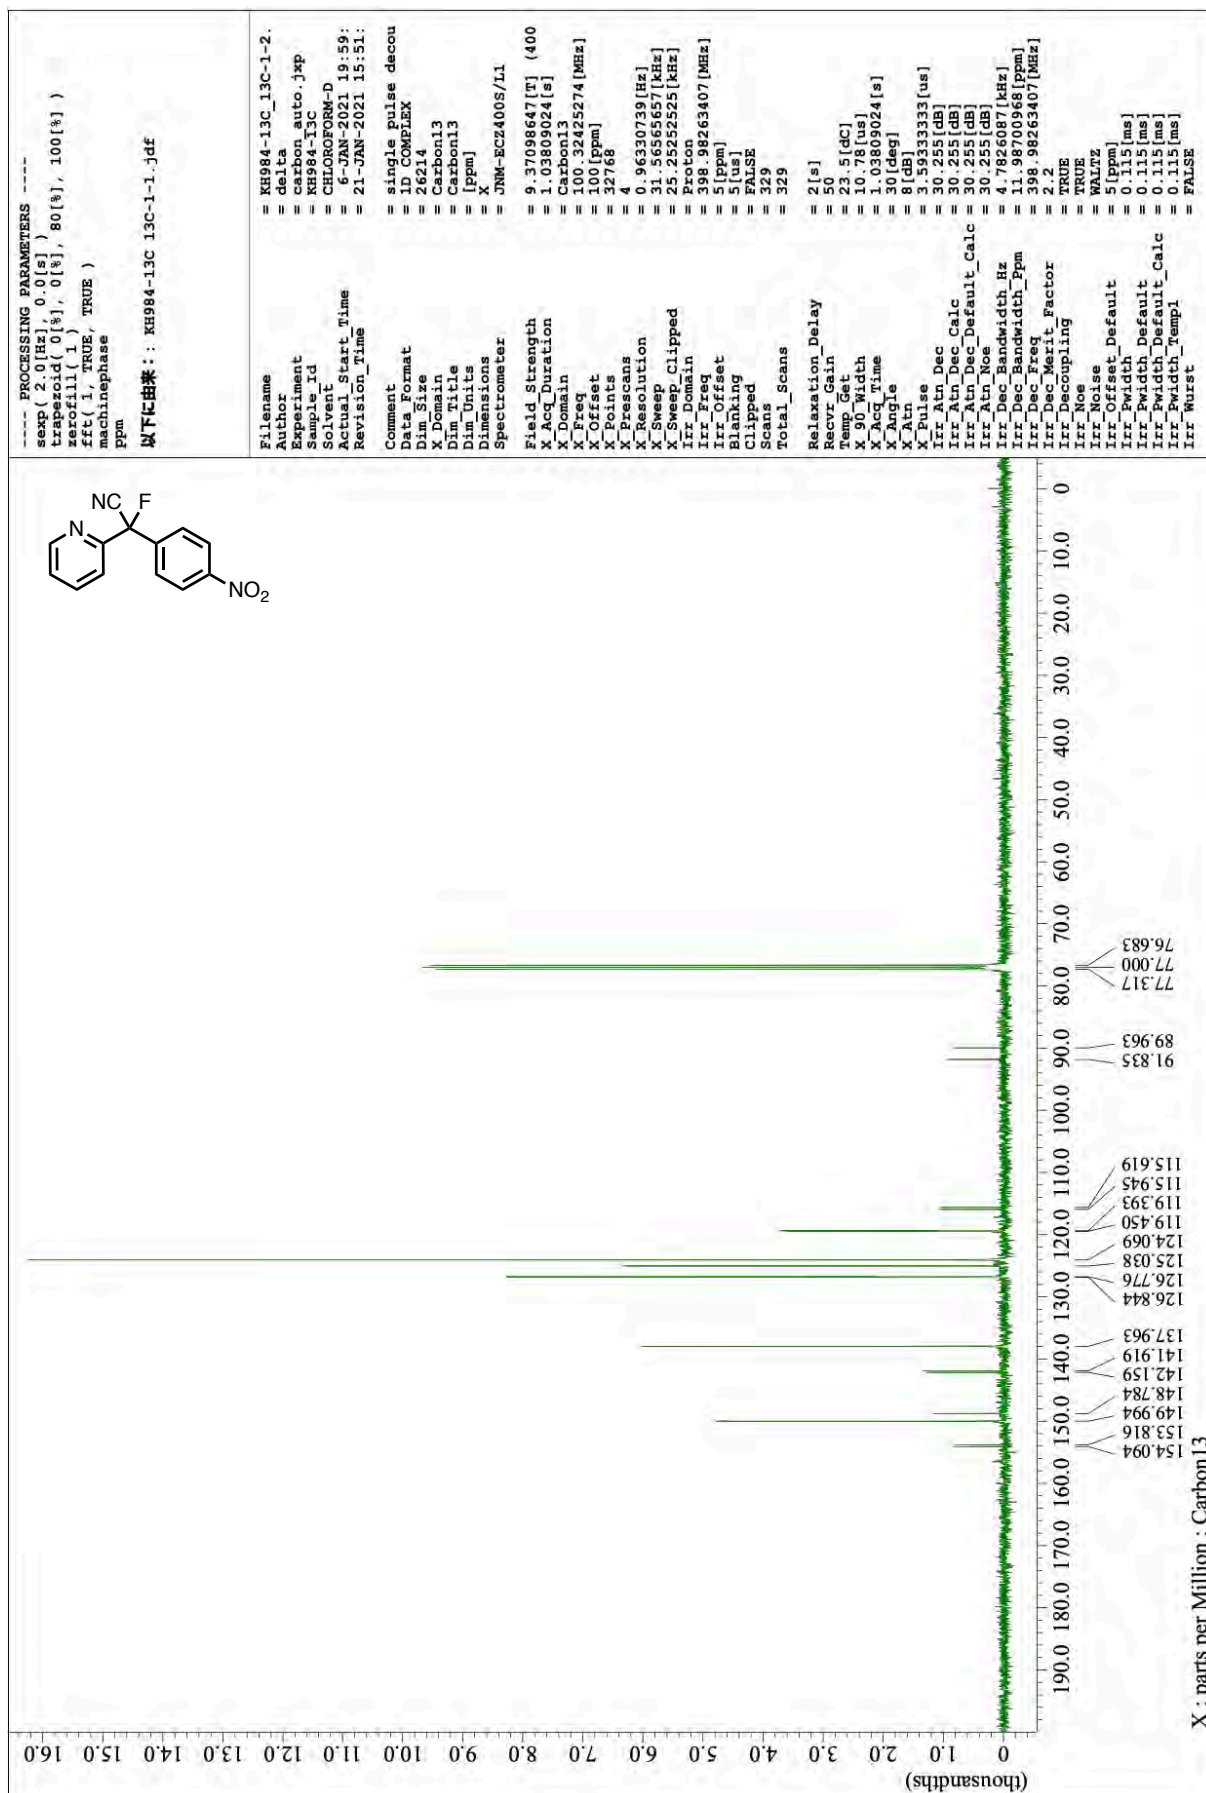

<sup>19</sup>F NMR of 2K (376 MHz, CDCl<sub>3</sub>)

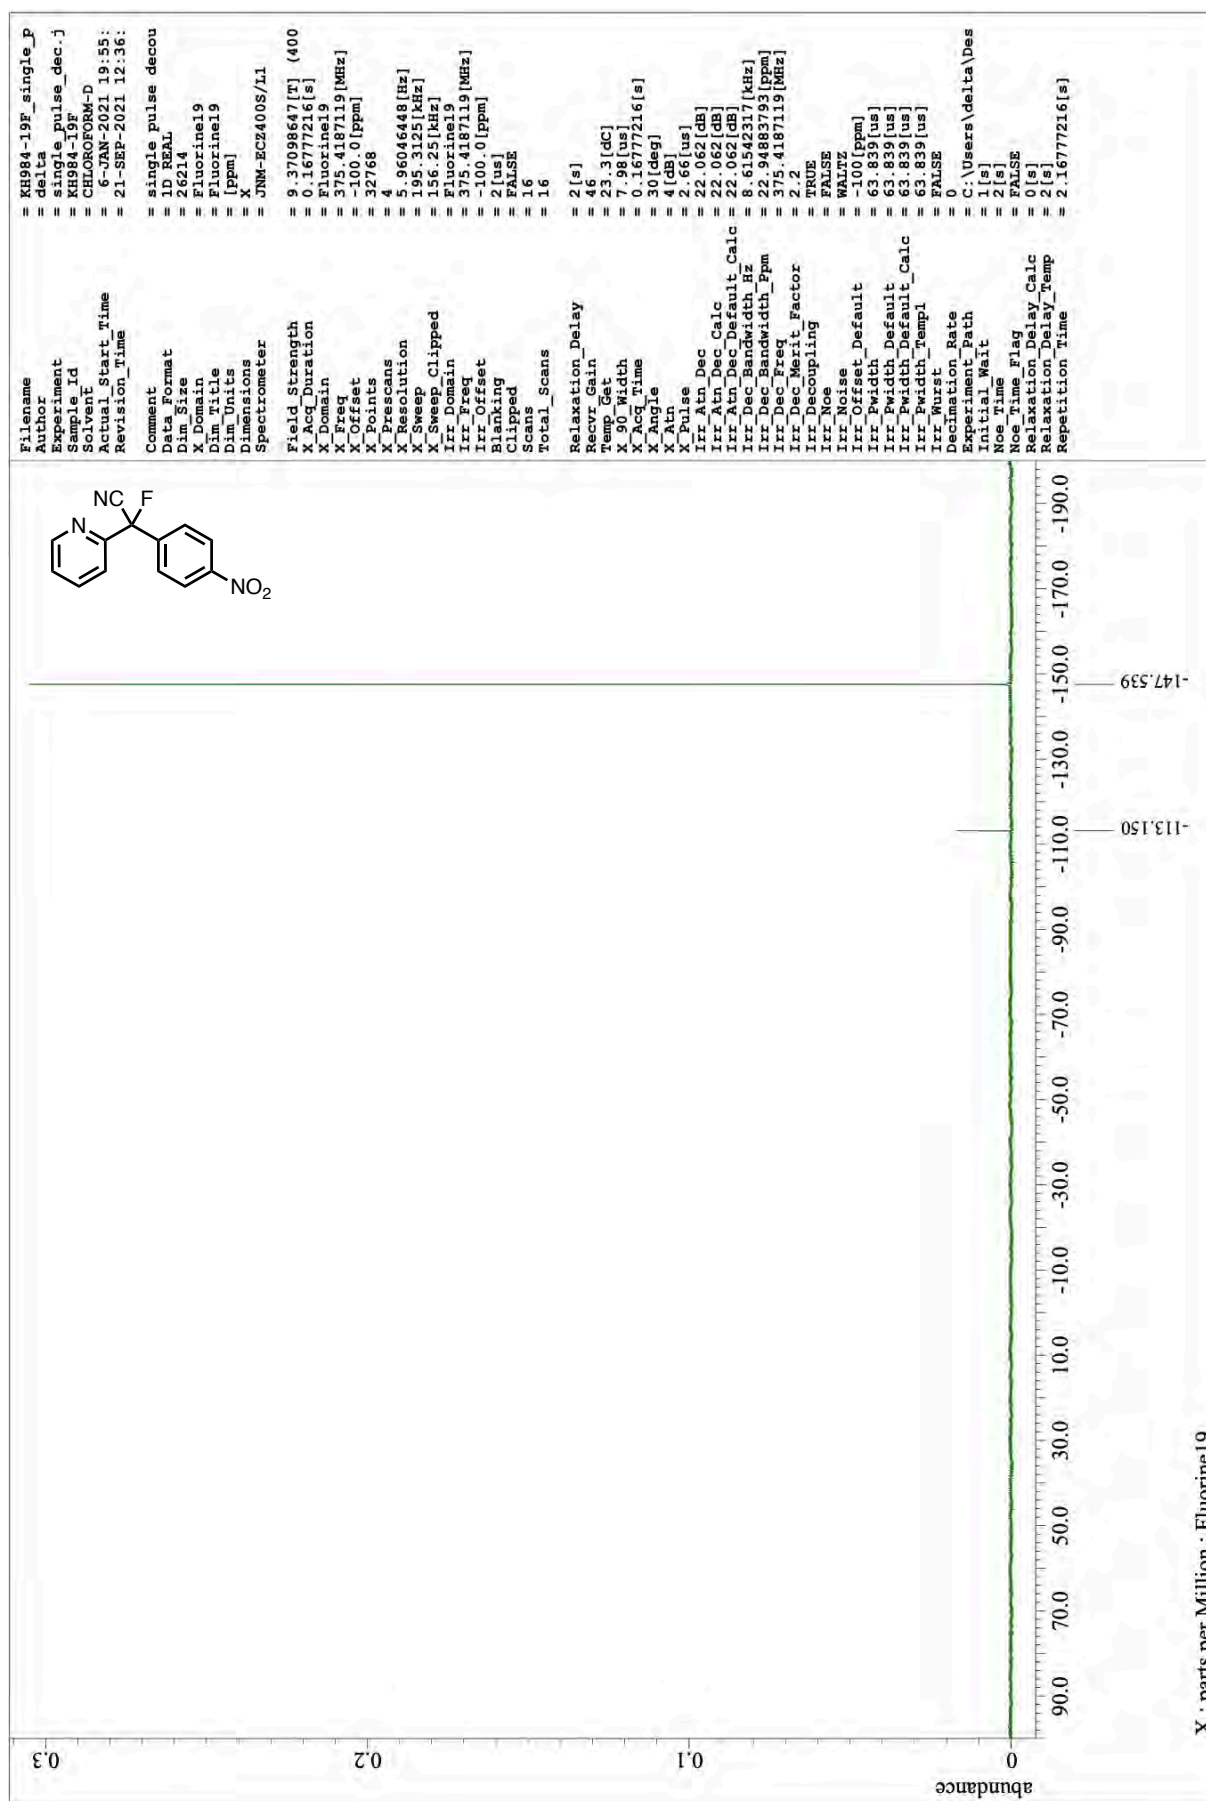

<sup>1</sup>H NMR of 2L (400 MHz, CDCl<sub>3</sub>)

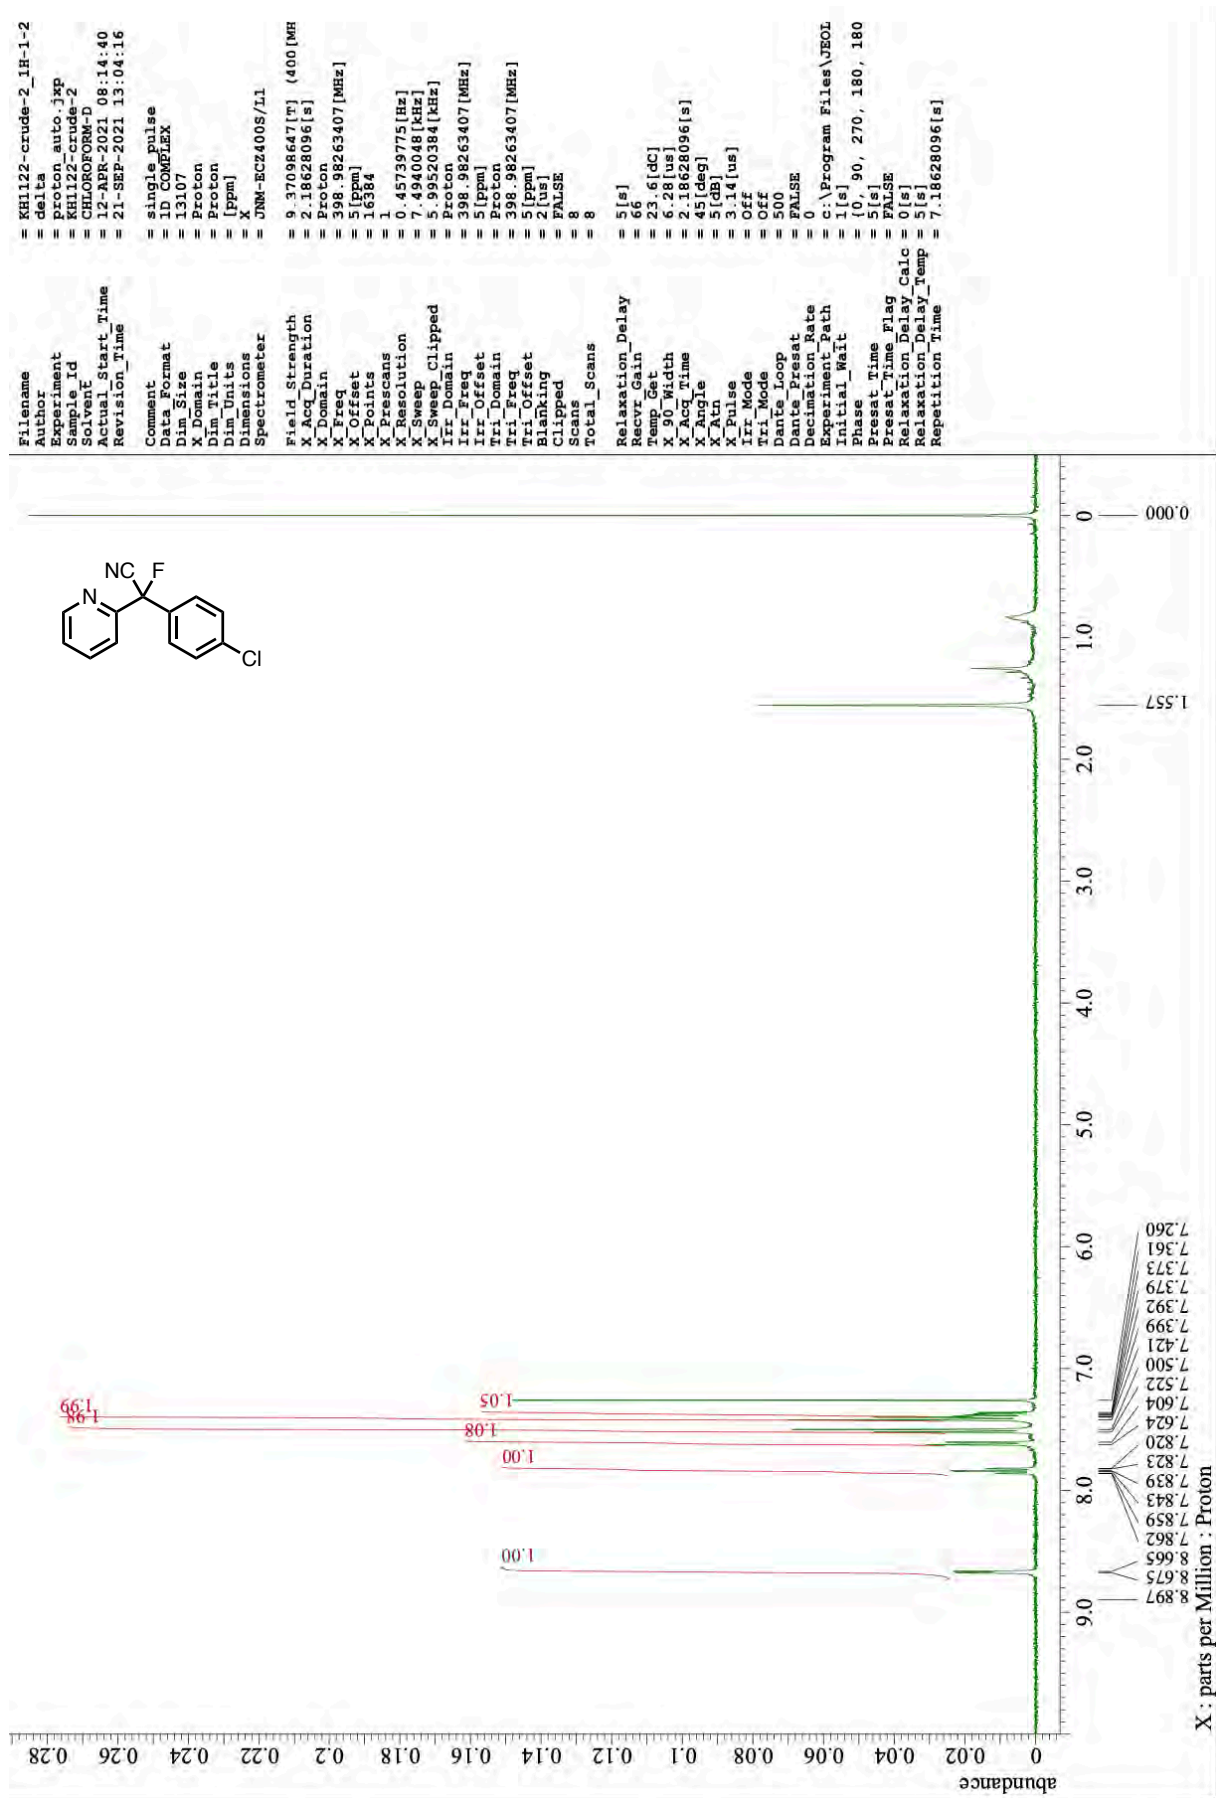

<sup>13</sup>C NMR of 2L (101 MHz, CDCl<sub>3</sub>)

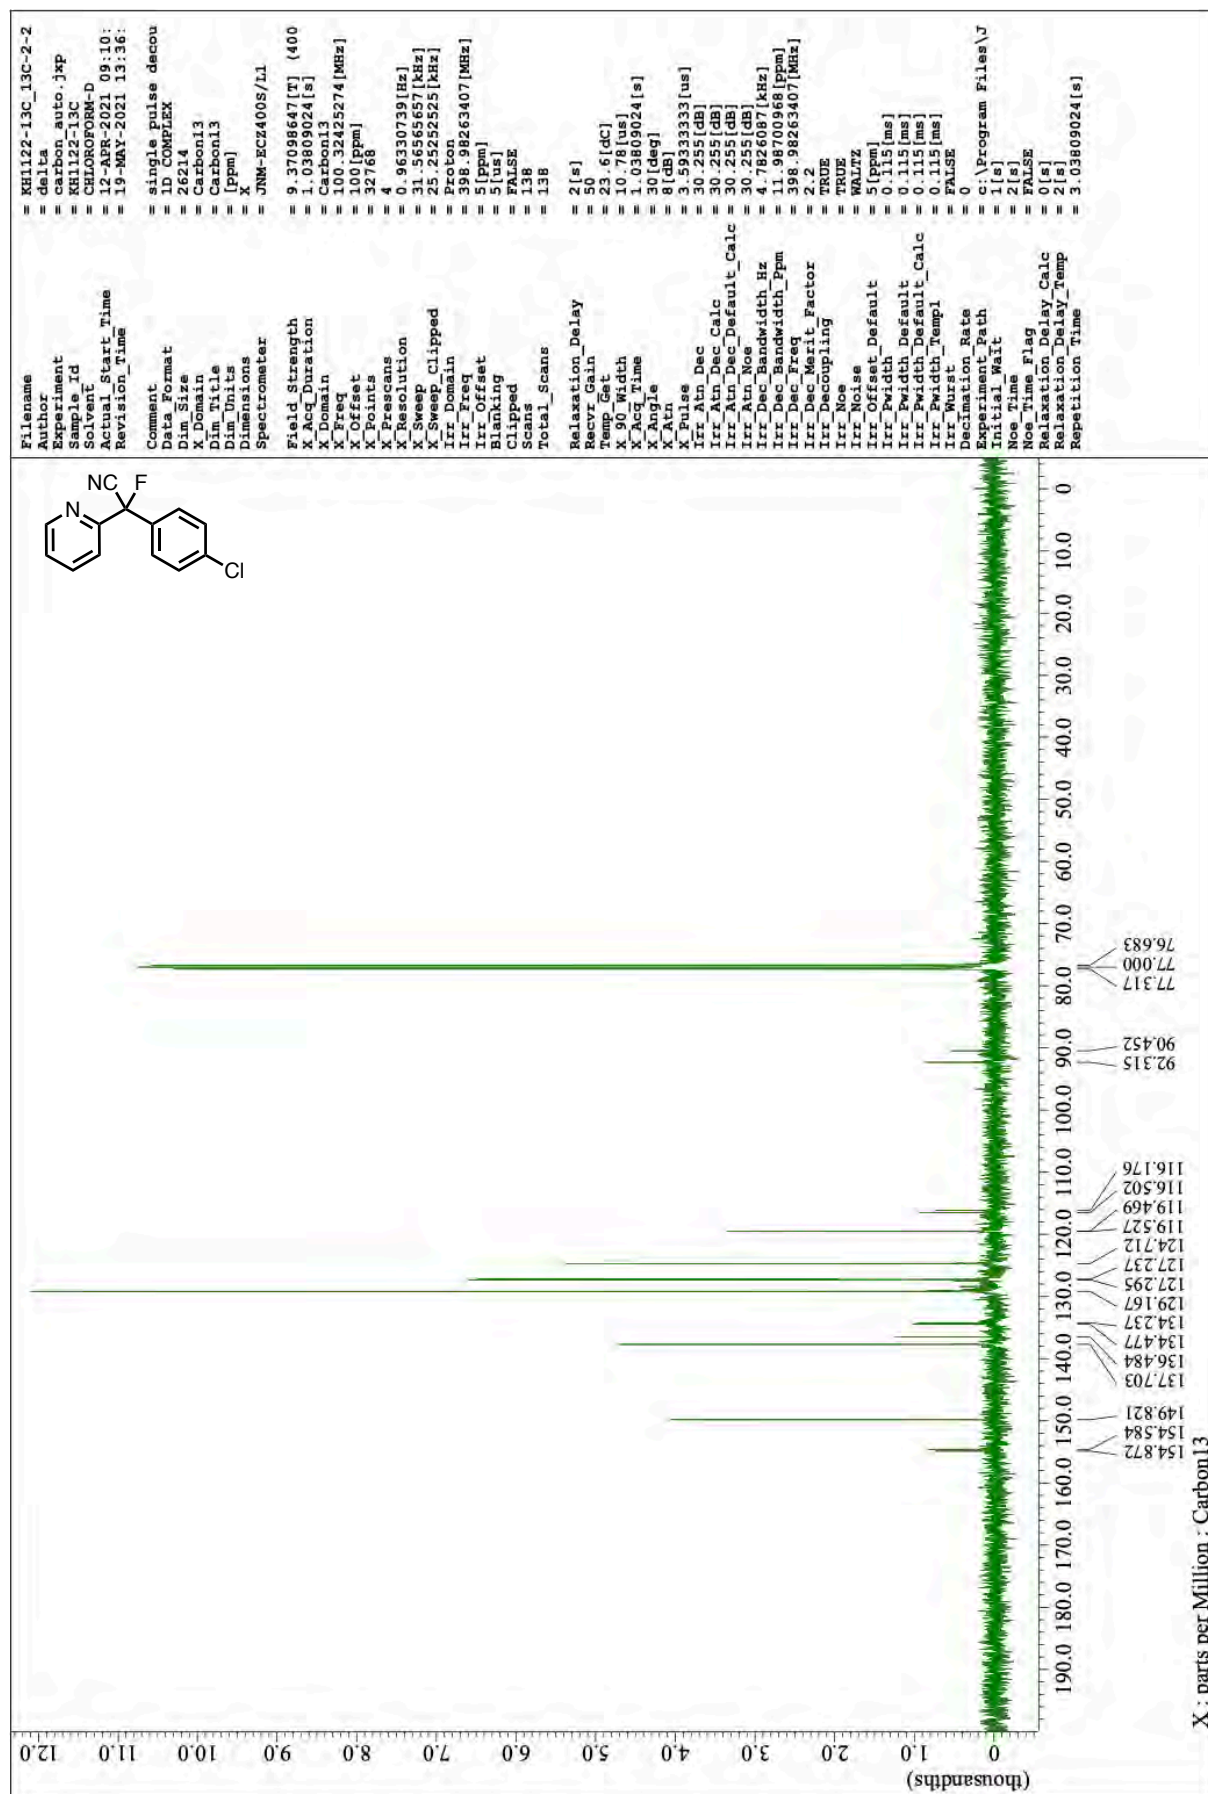

<sup>19</sup>F NMR of 2L (376 MHz, CDCl<sub>3</sub>)

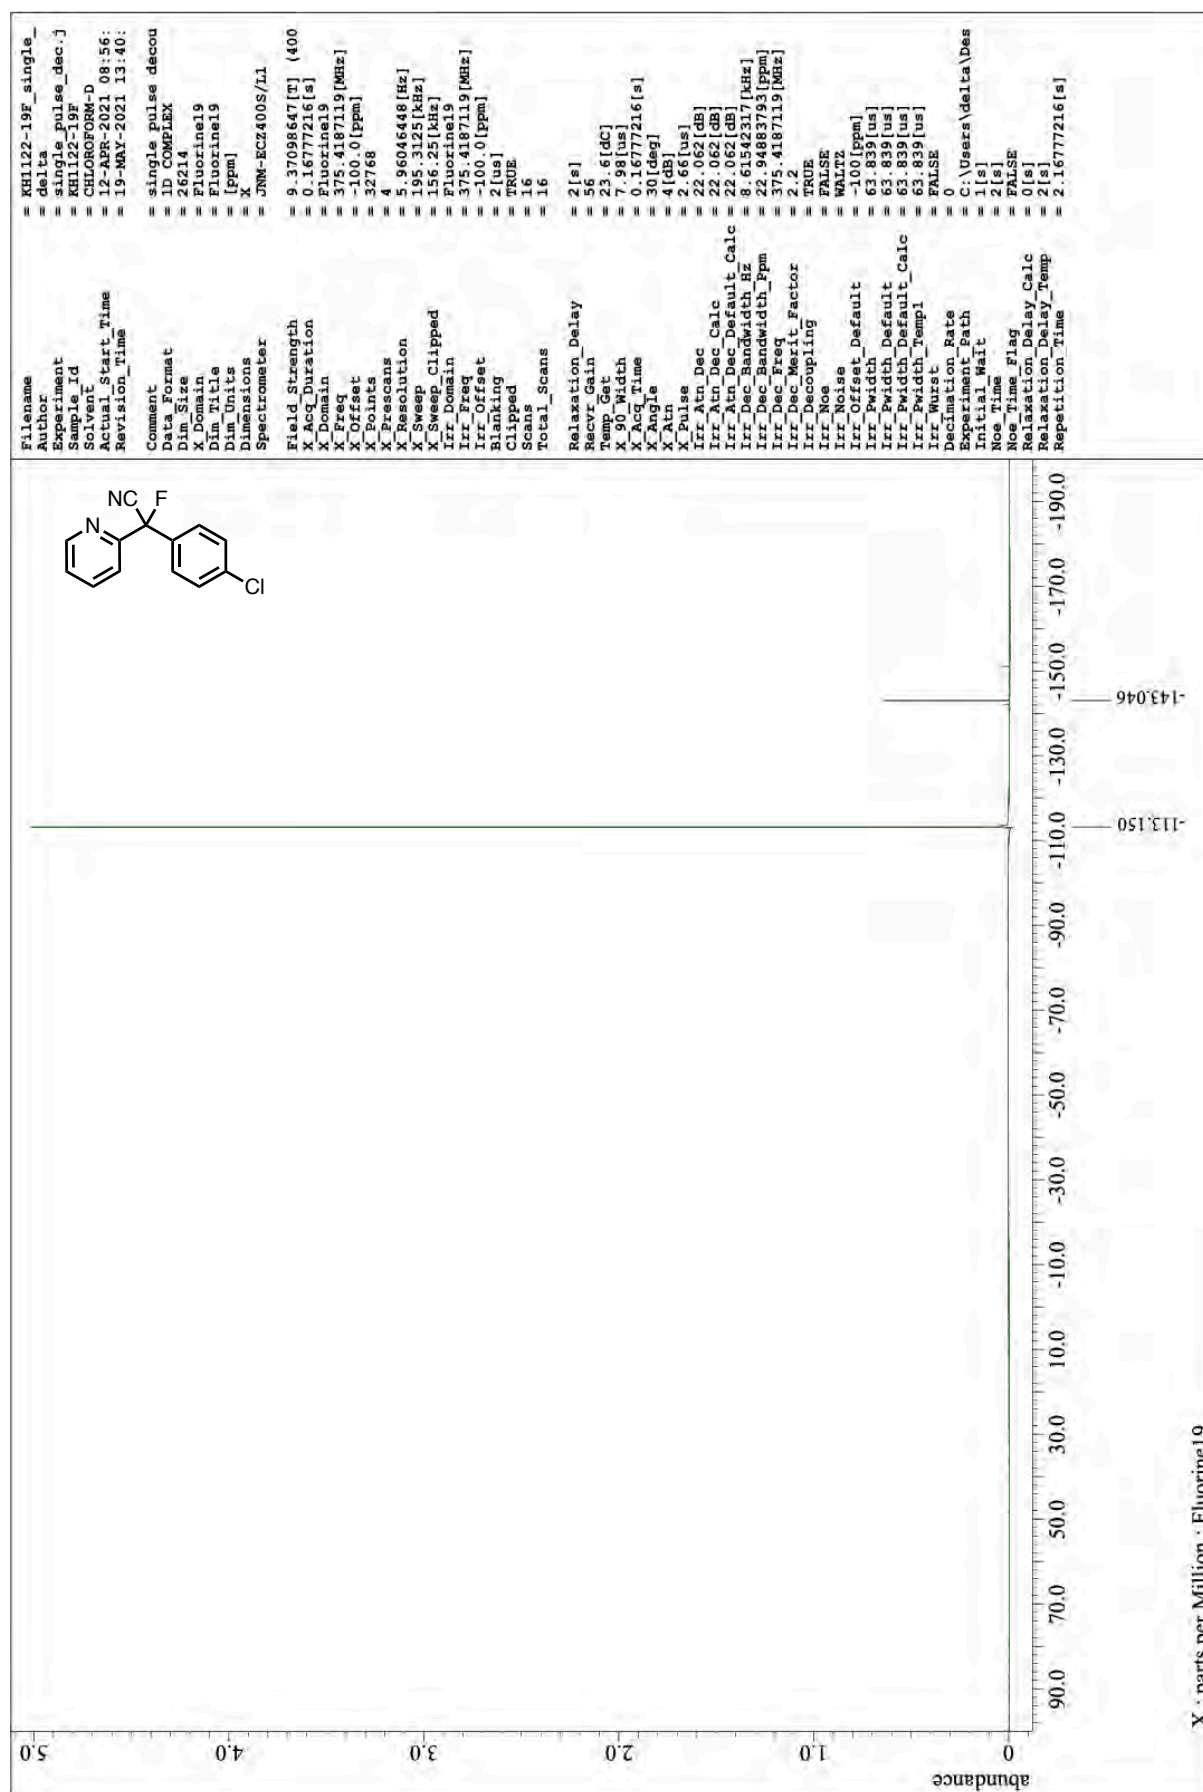

<sup>1</sup>H NMR of 2M (400 MHz, CDCl<sub>3</sub>)

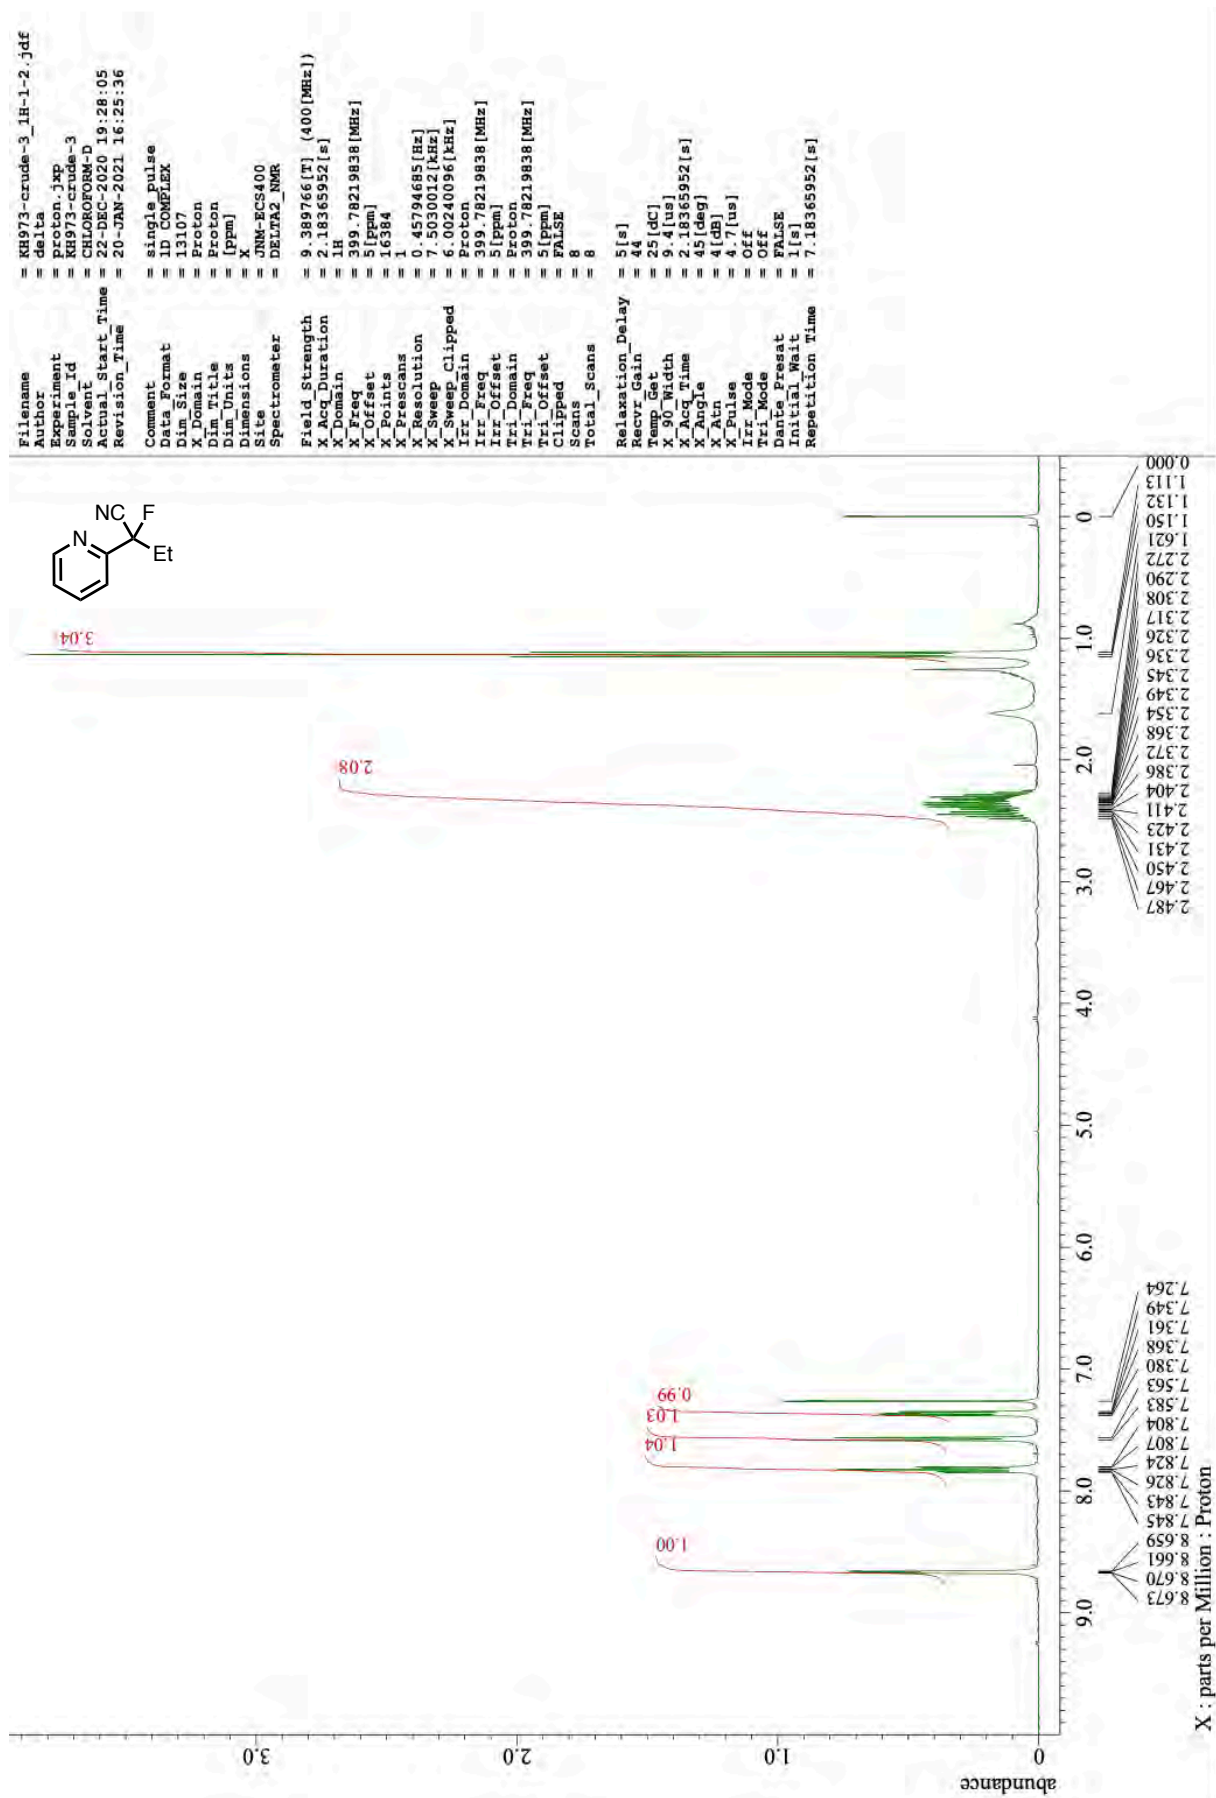

<sup>13</sup>C NMR of 2M (101 MHz, CDCl<sub>3</sub>)

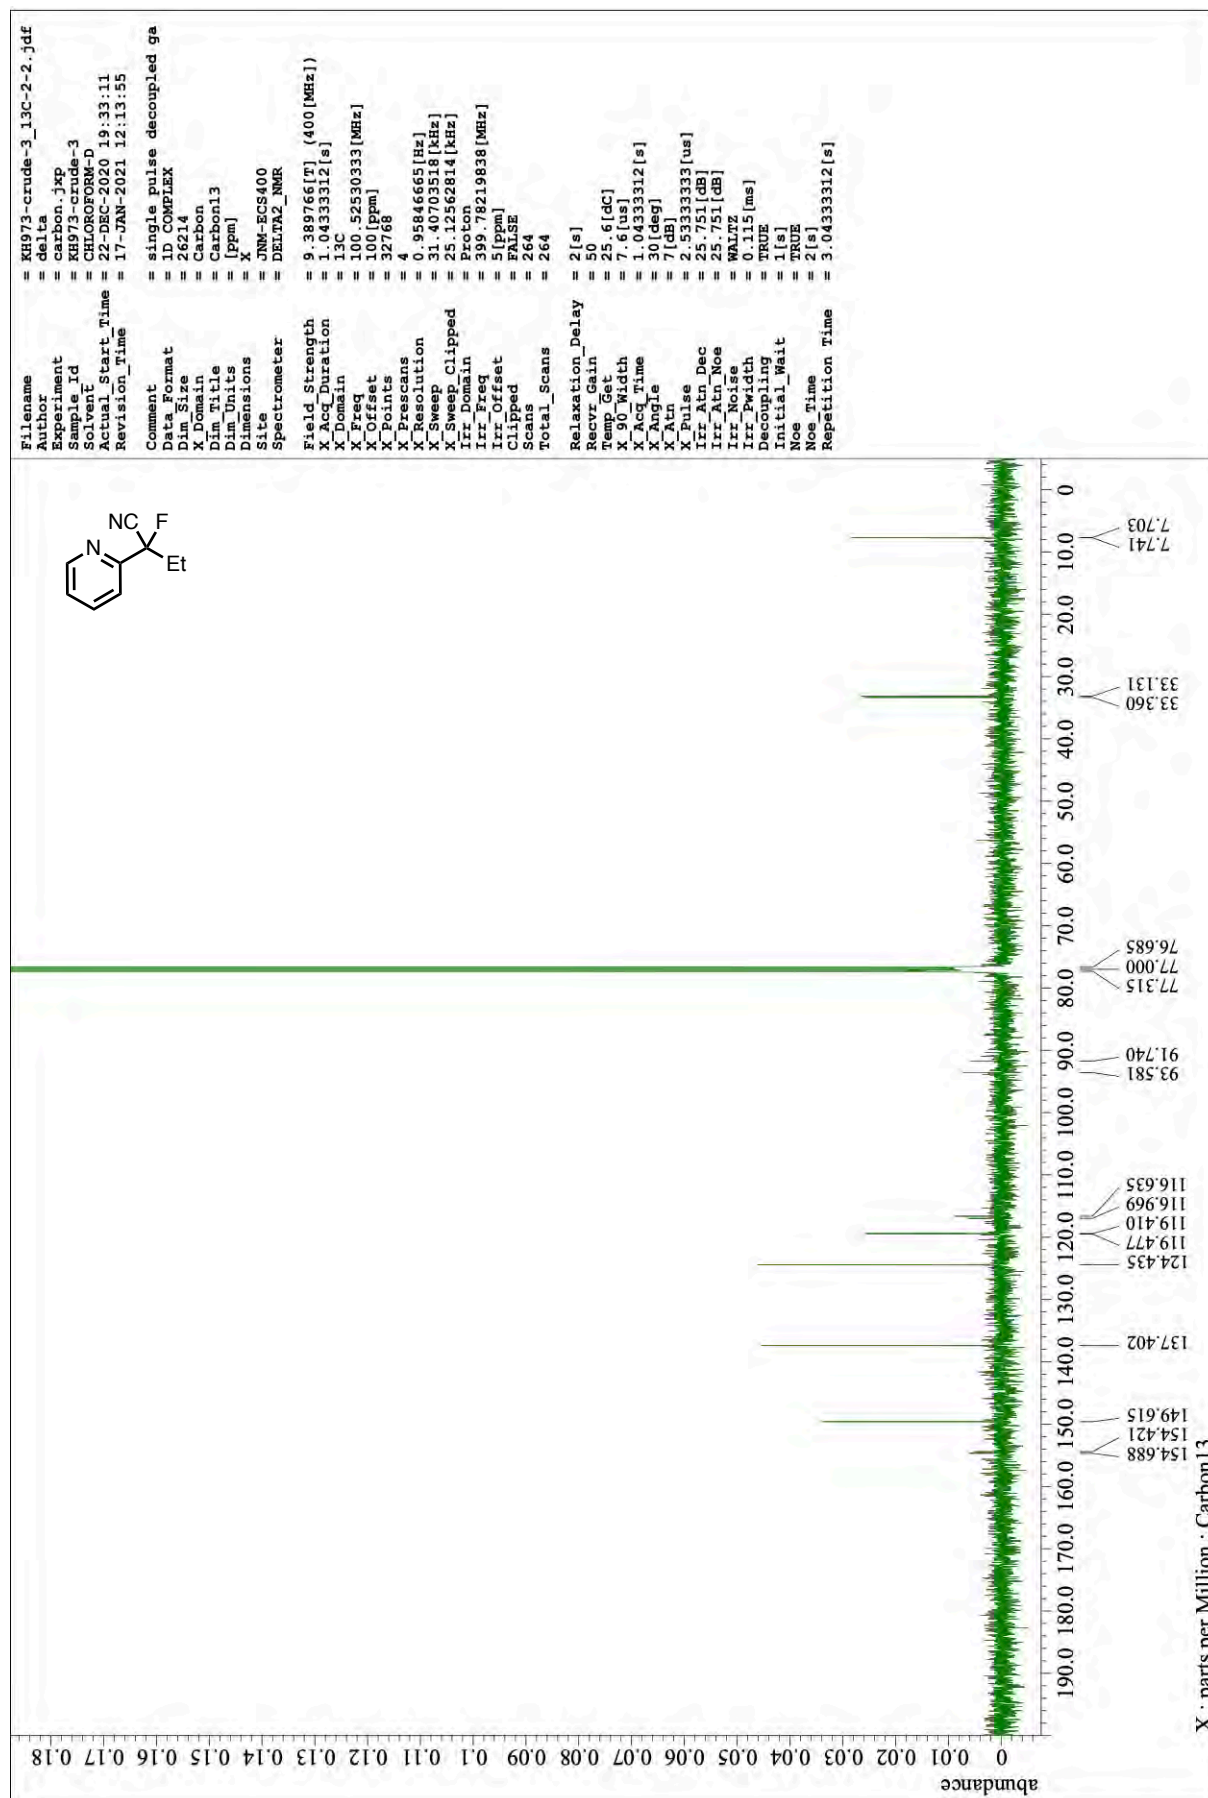

<sup>19</sup>F NMR of 2M (376 MHz, CDCl<sub>3</sub>)

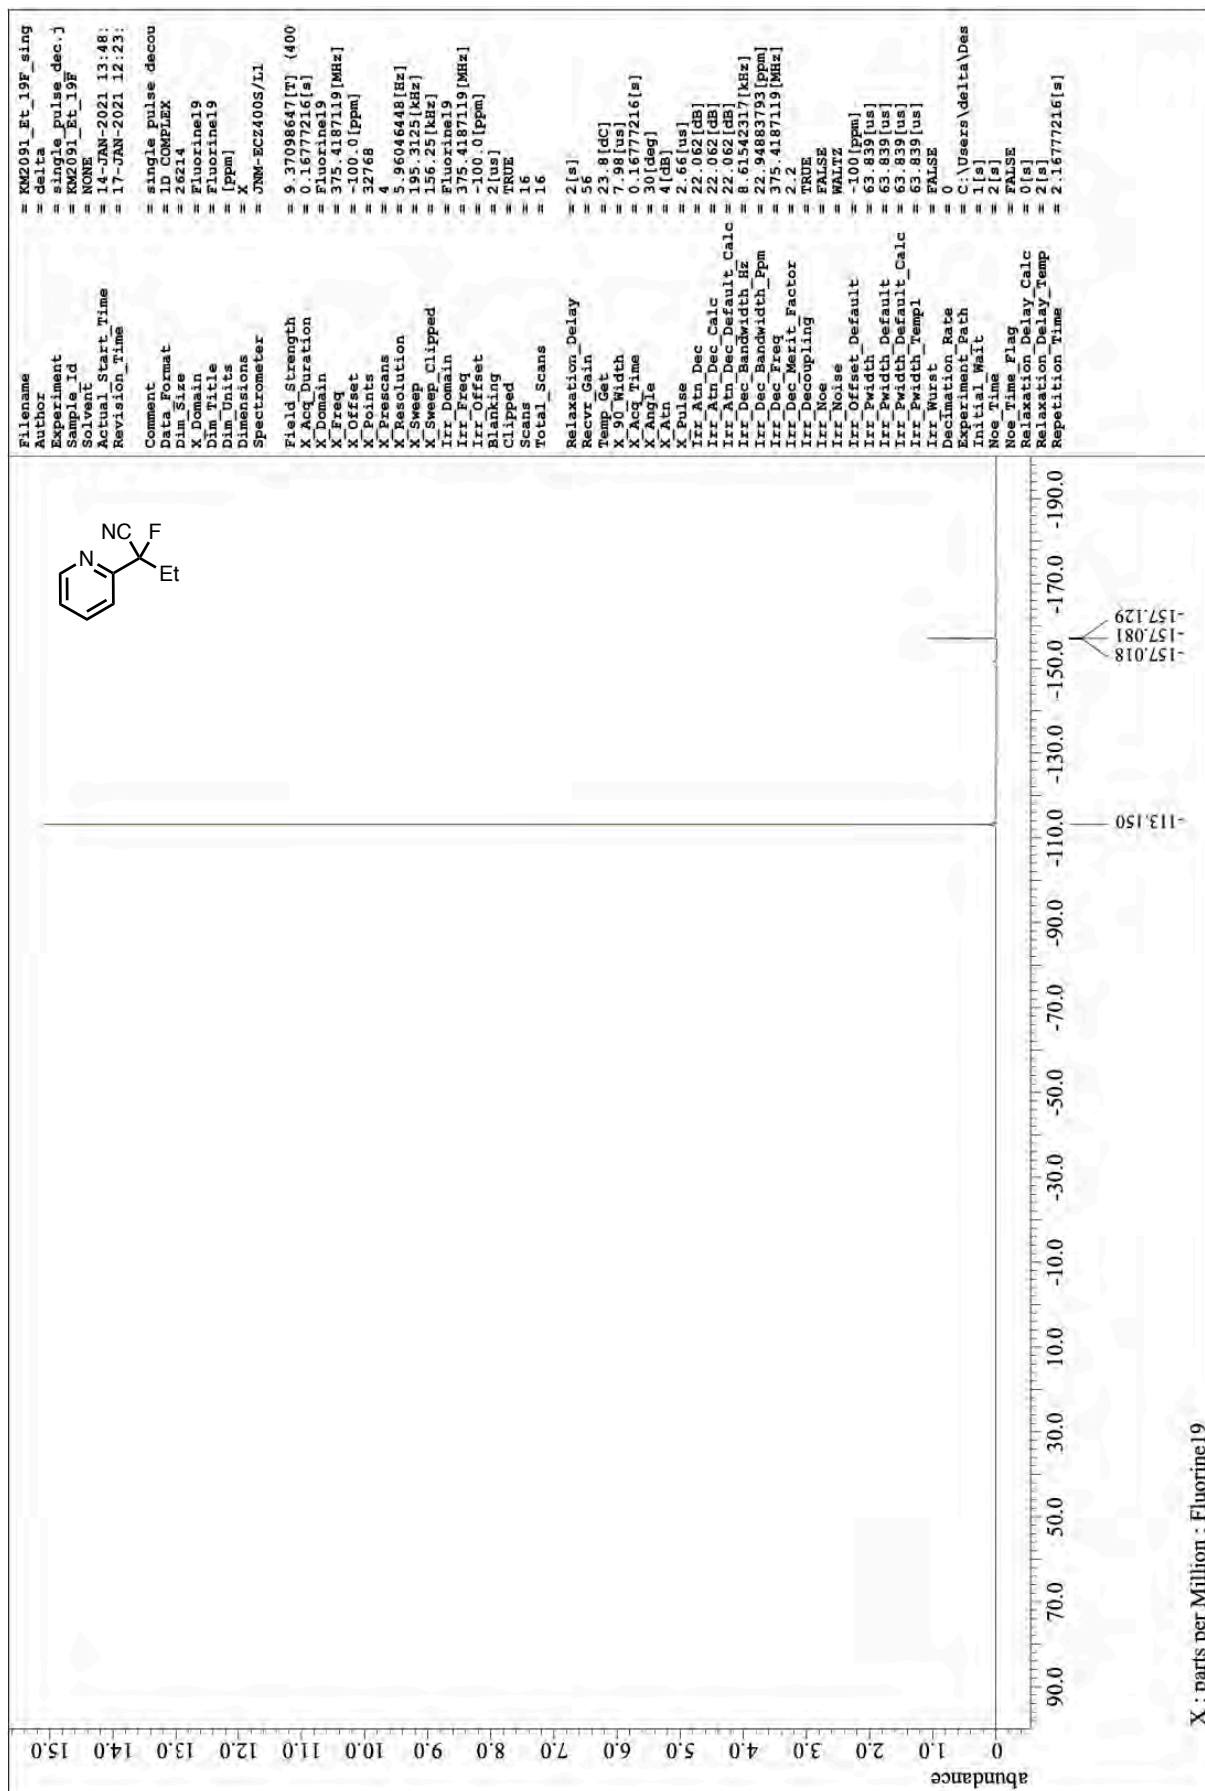



<sup>1</sup>H NMR of 2N (400 MHz, CDCl<sub>3</sub>)

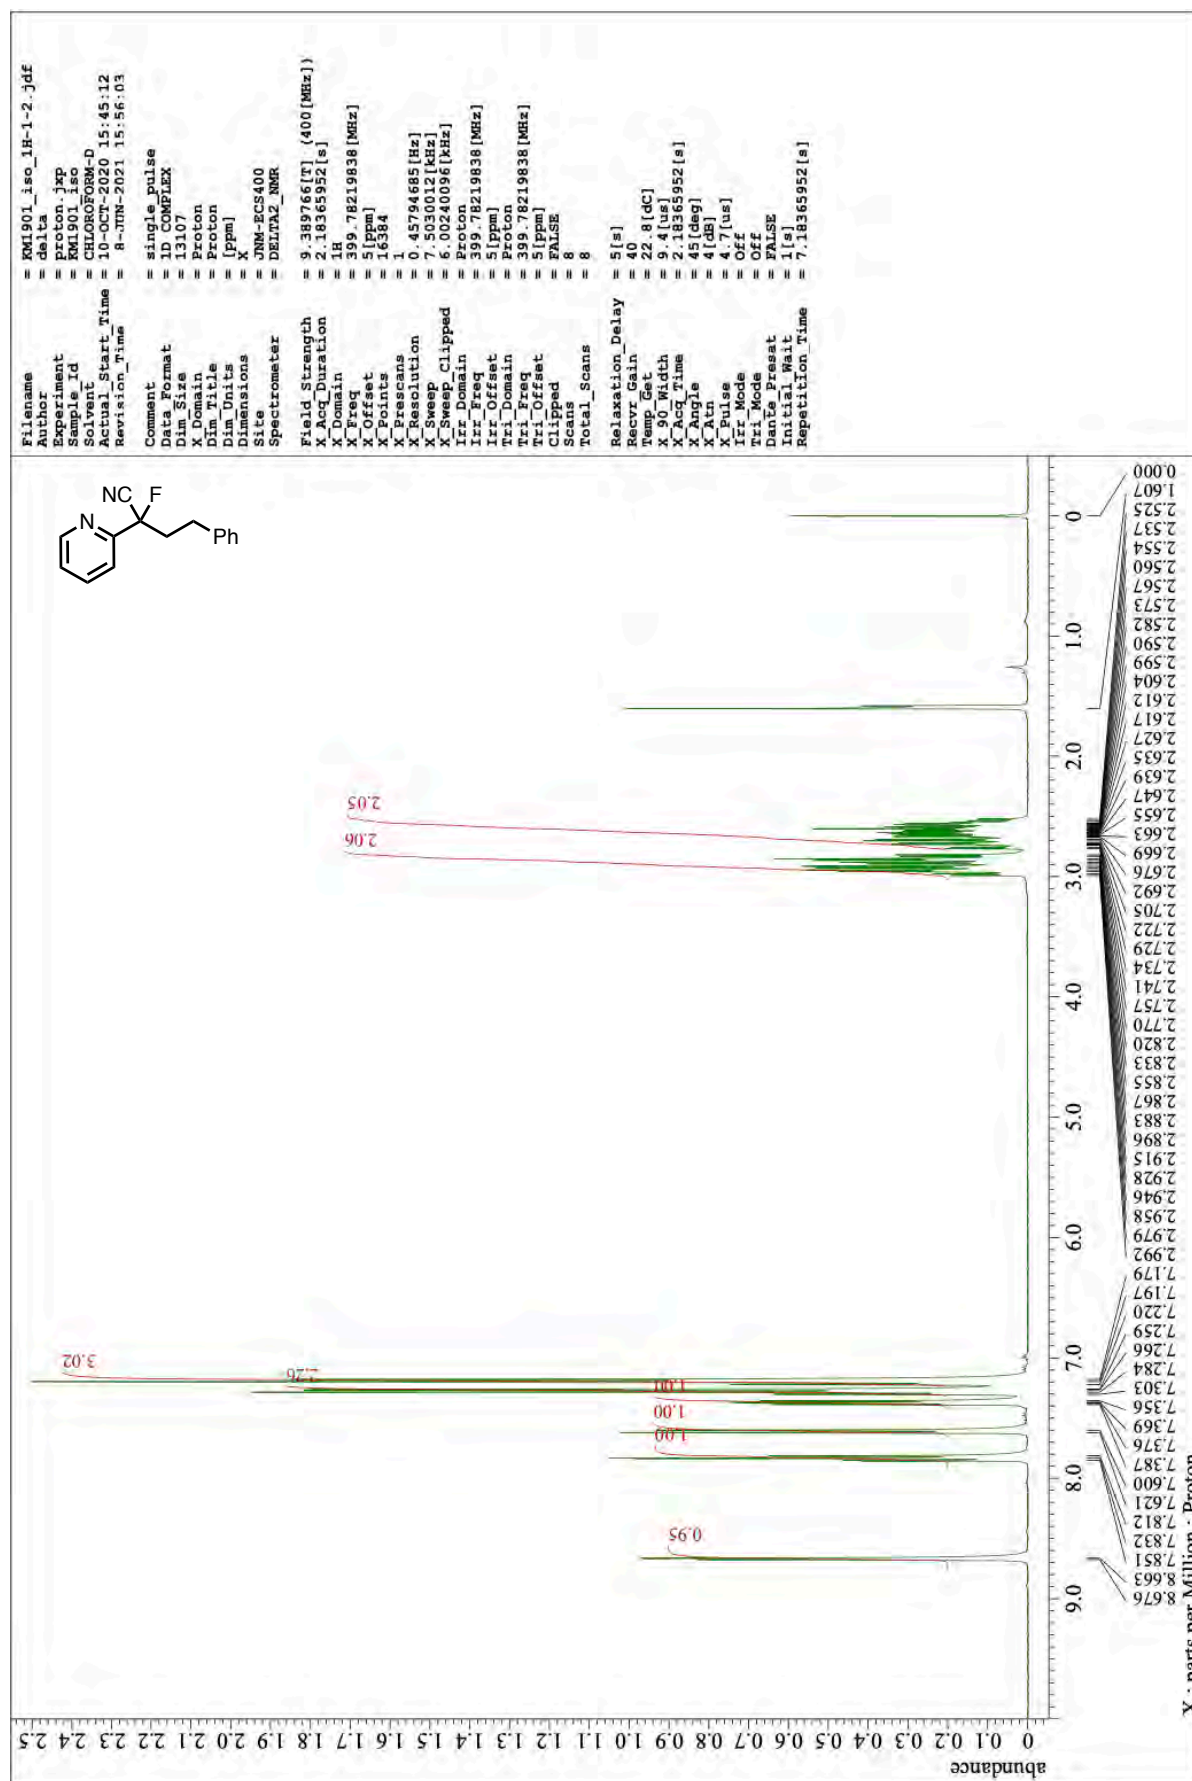

<sup>13</sup>C NMR of 2N (101 MHz, CDCl<sub>3</sub>)

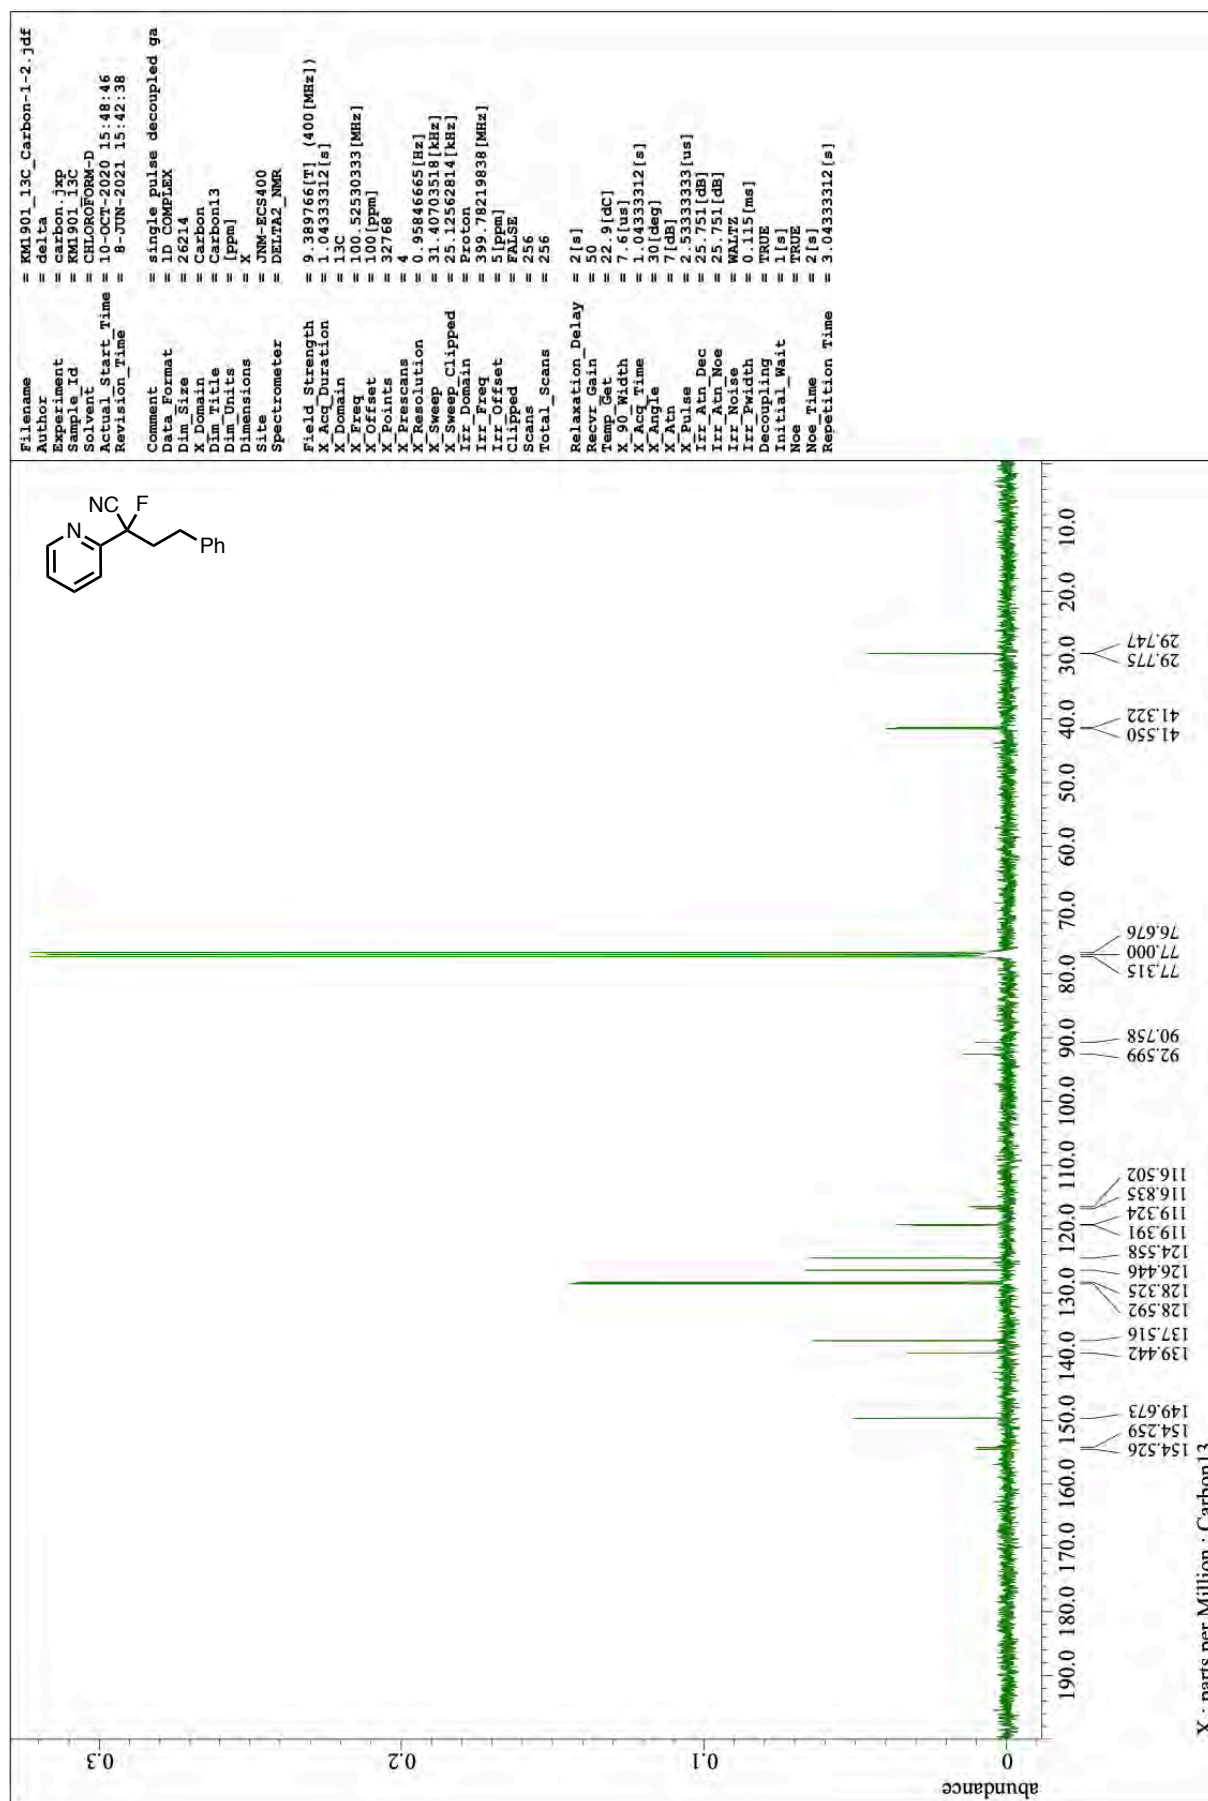

<sup>19</sup>F NMR of 2N (376 MHz, CDCl<sub>3</sub>)

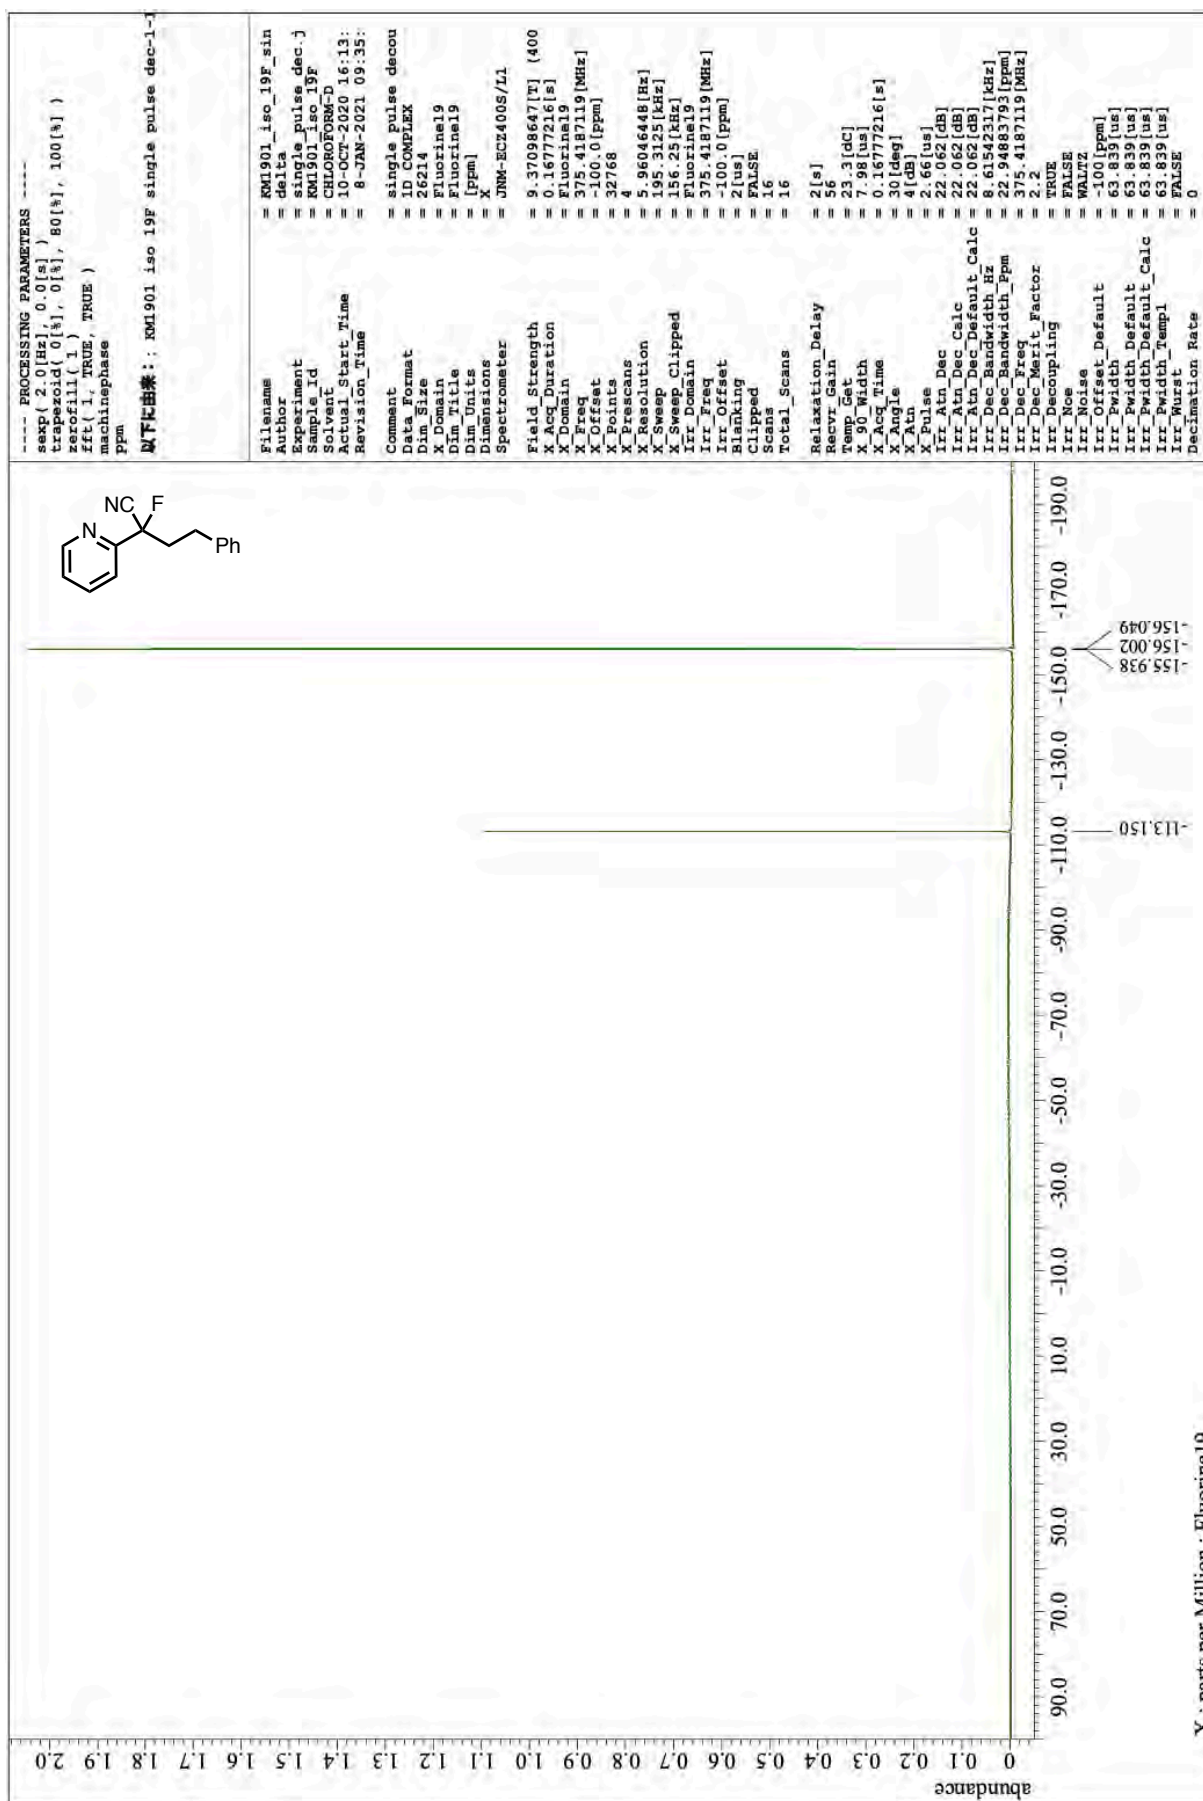

<sup>1</sup>H NMR of **20** (400 MHz, CDCl<sub>3</sub>)

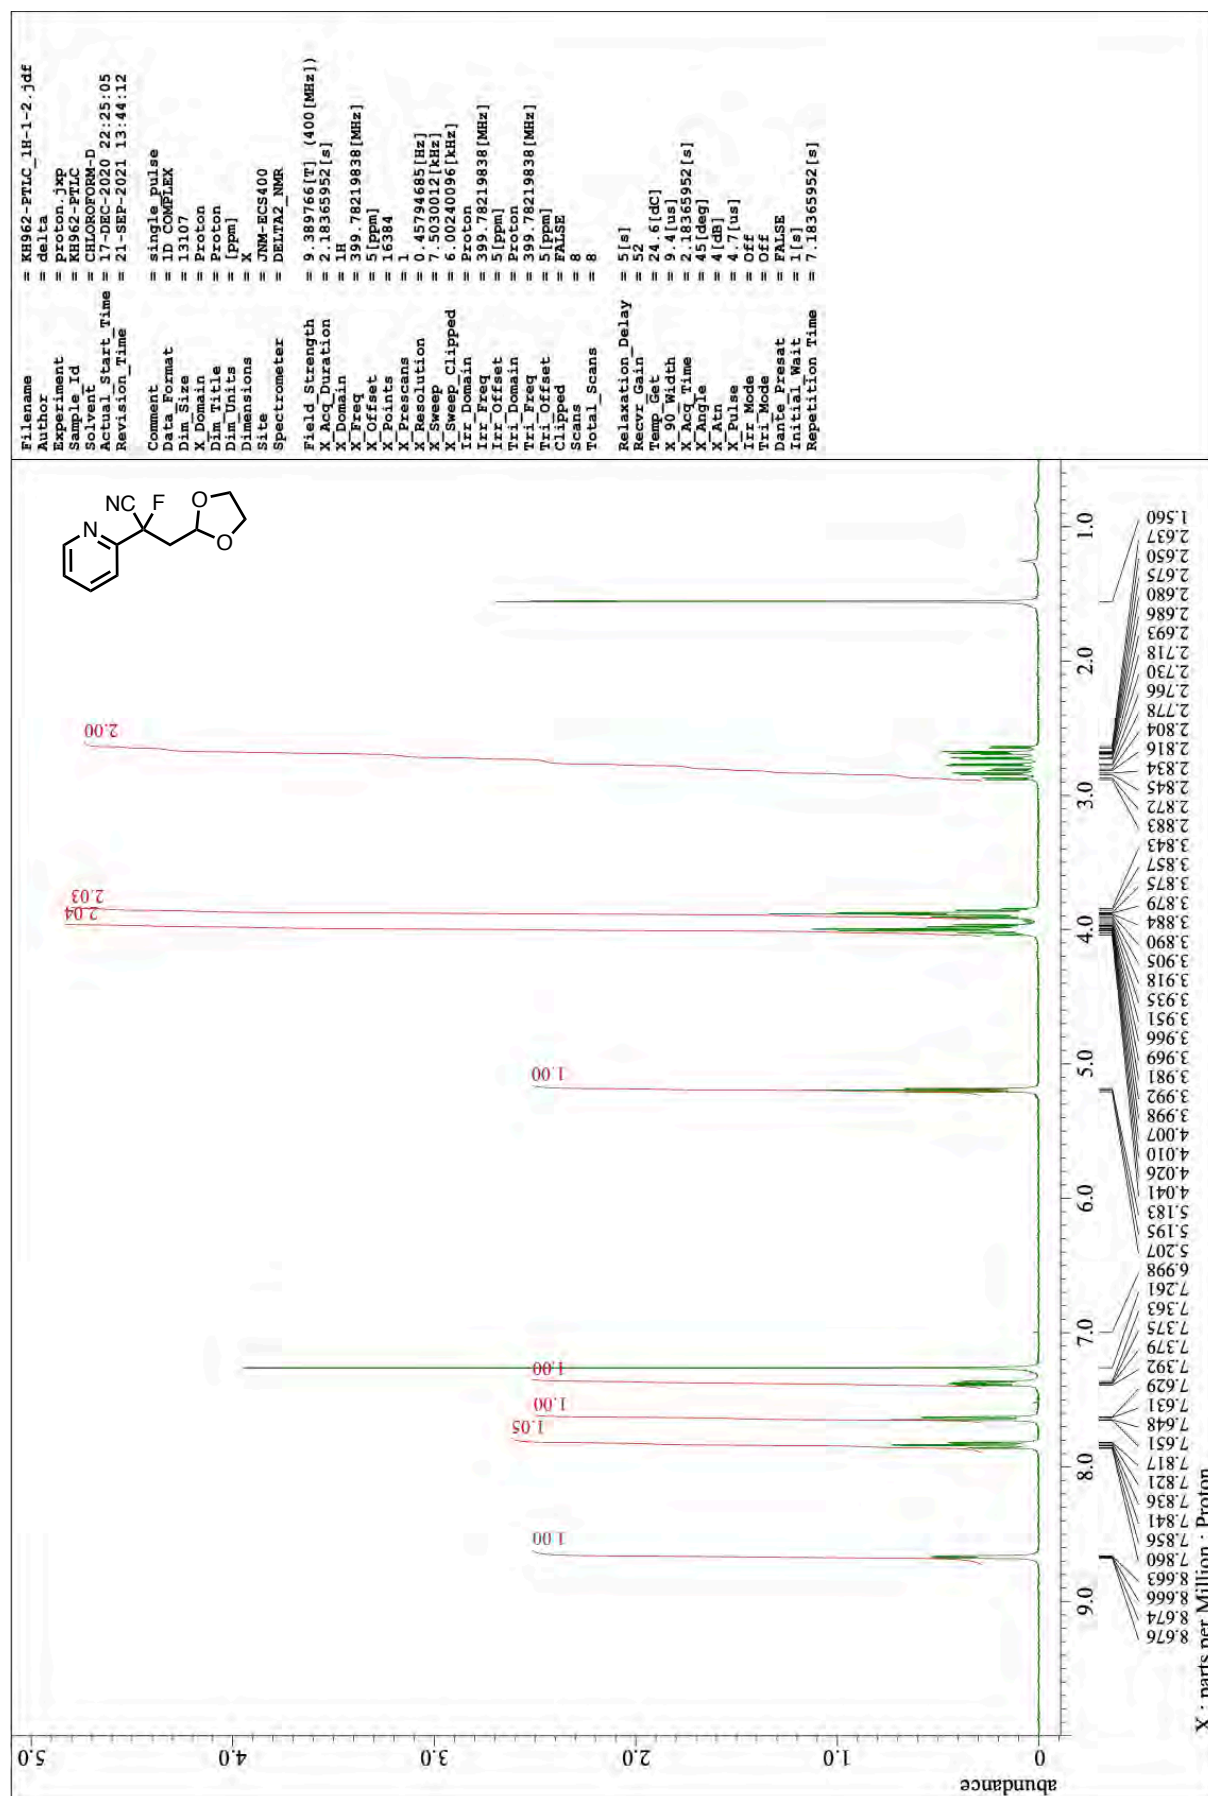

<sup>13</sup>C NMR of **20** (101 MHz, CDCl<sub>3</sub>)

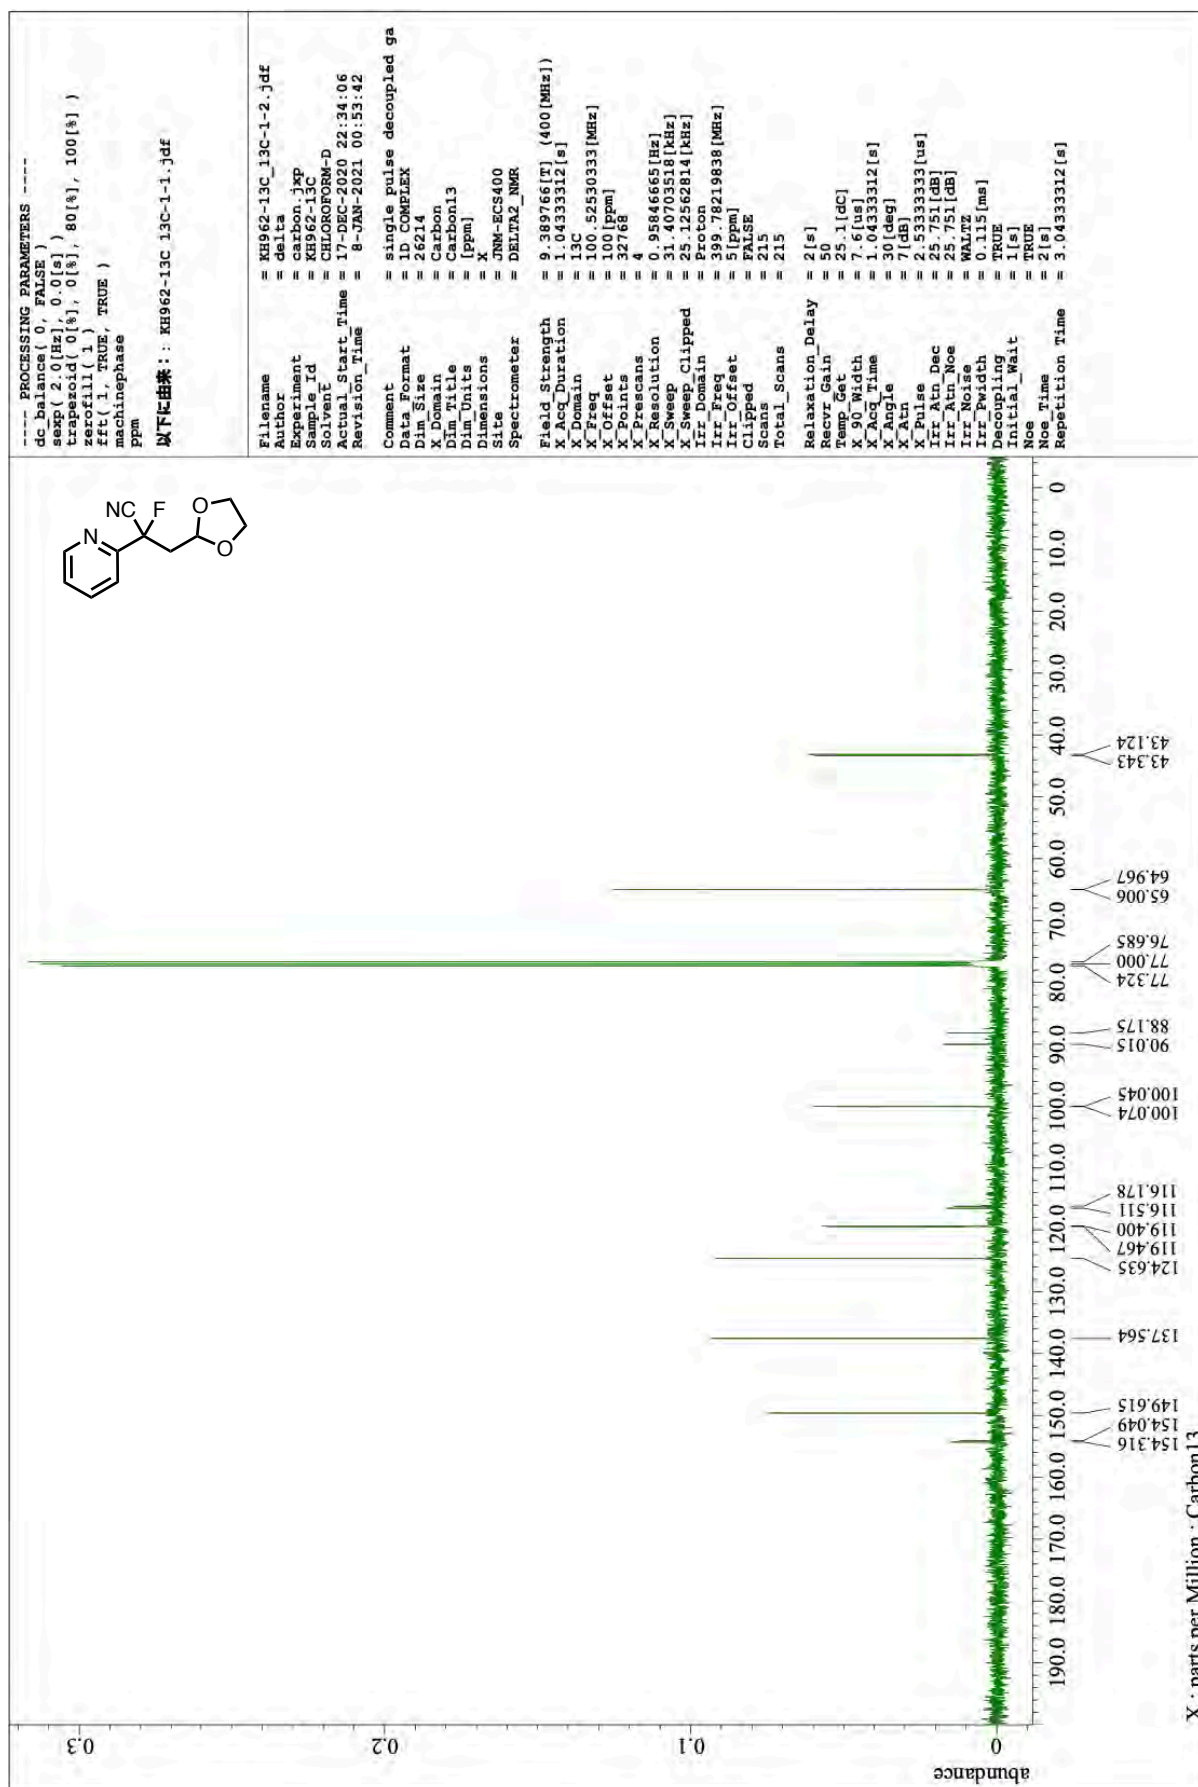

<sup>19</sup>F NMR of **20** (376 MHz, CDCl<sub>3</sub>)

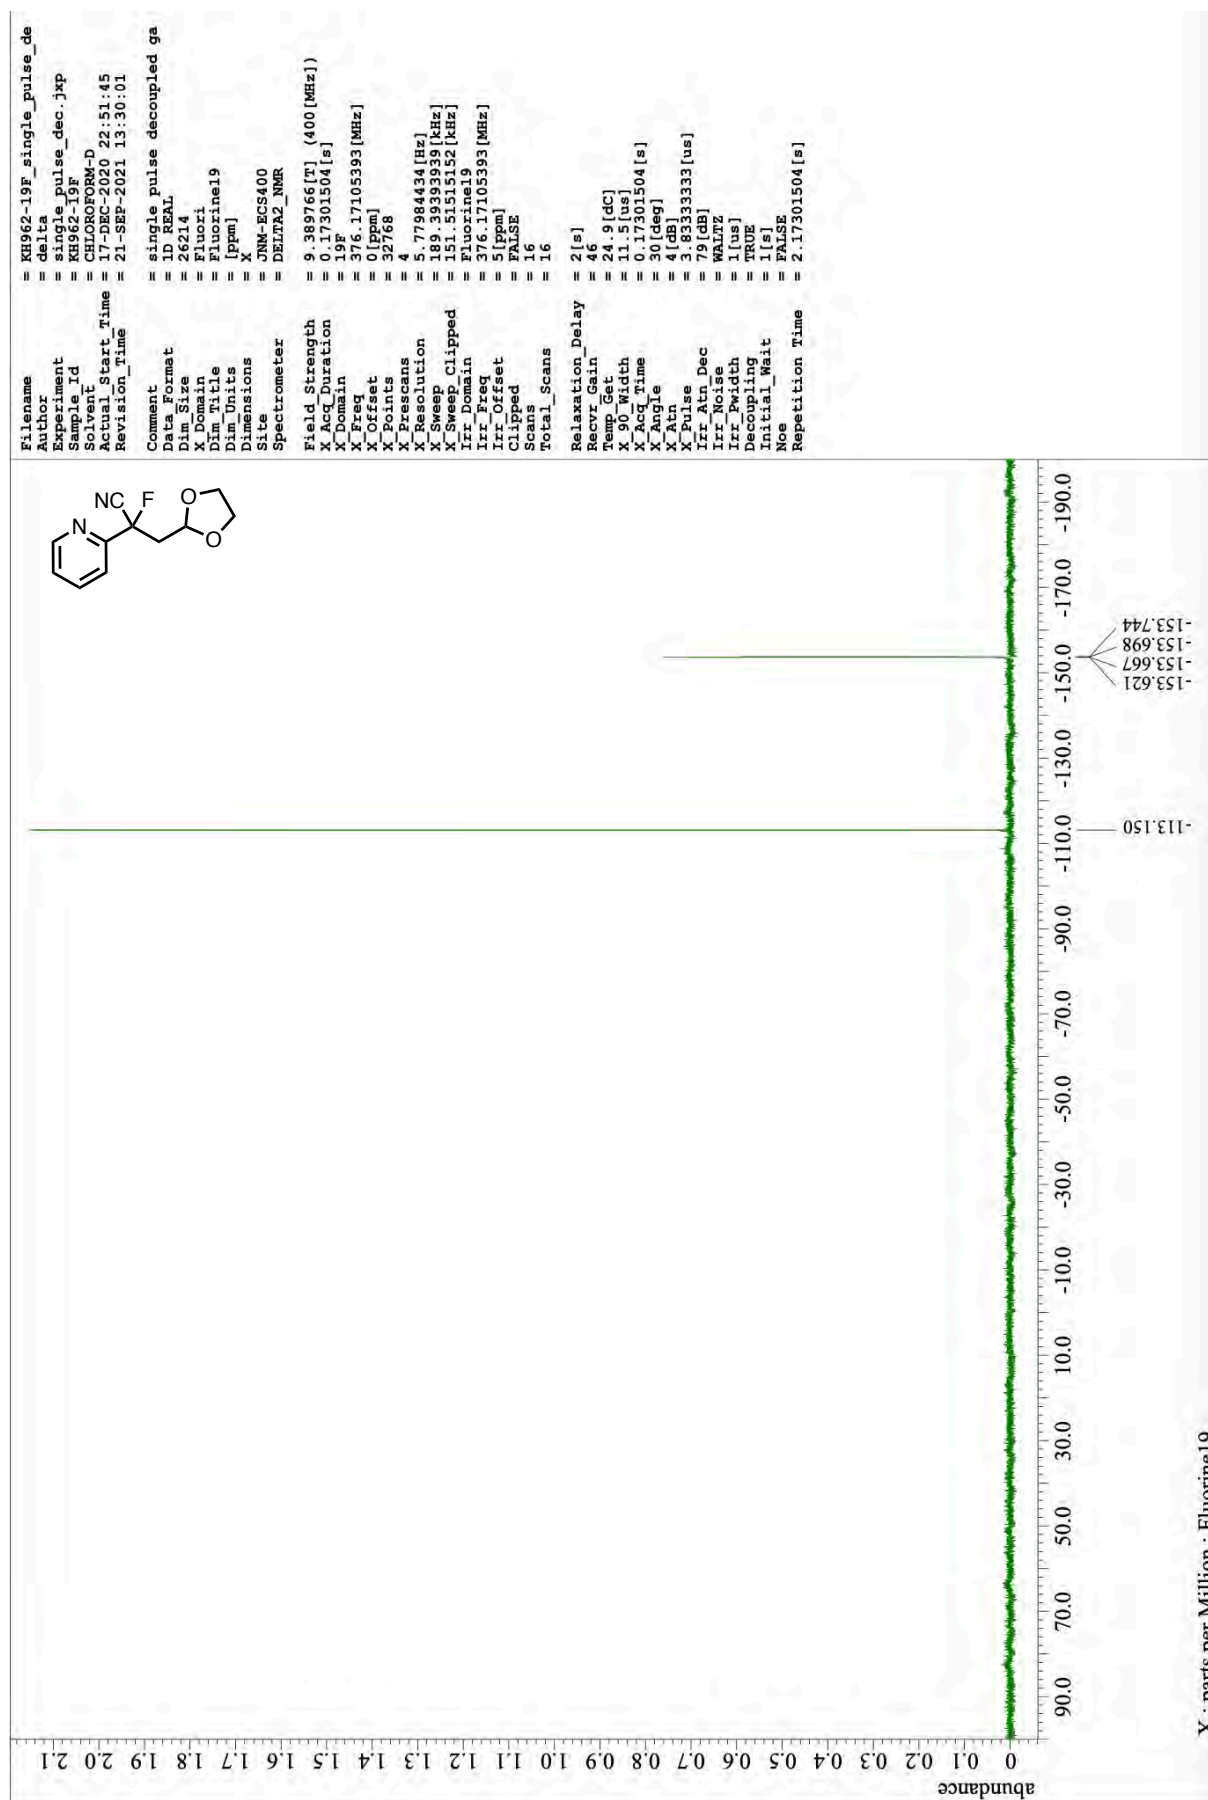

<sup>1</sup>H NMR of 2P (400 MHz, CDCl<sub>3</sub>)

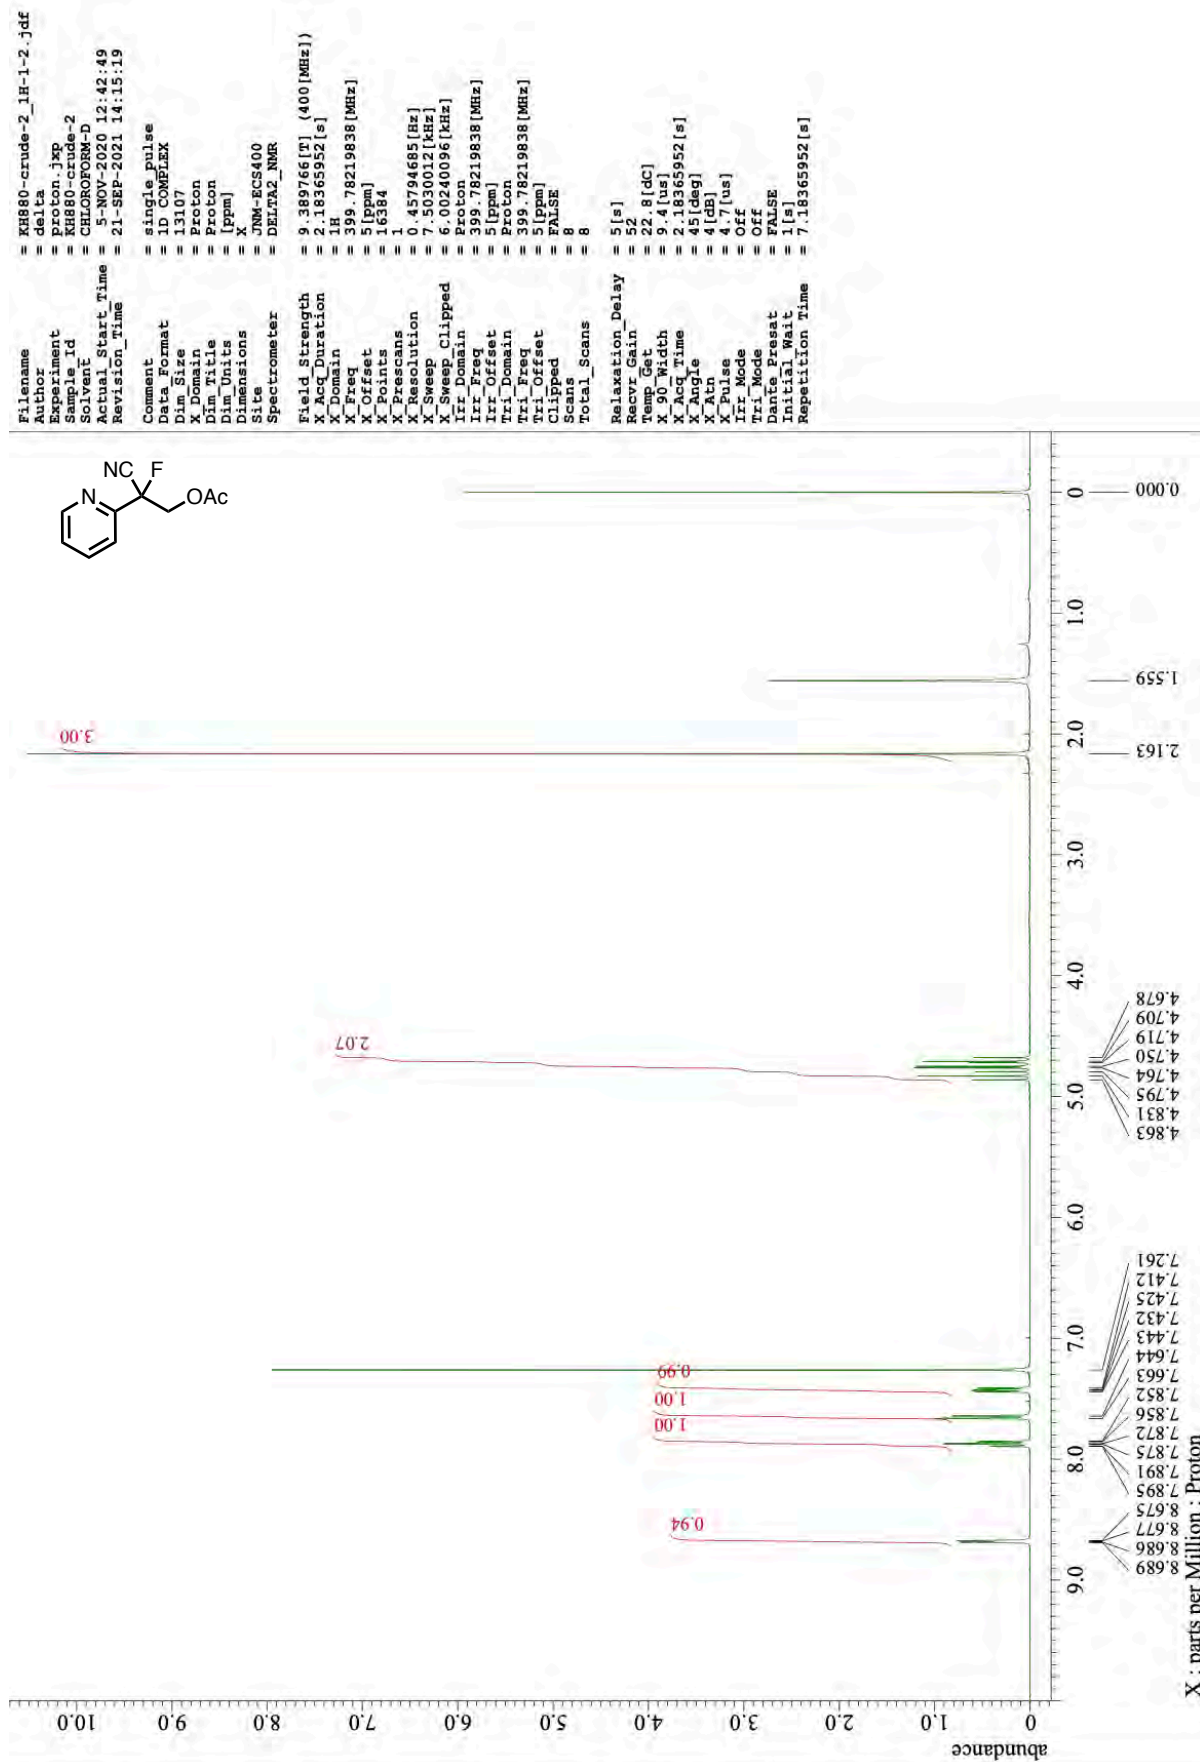

<sup>13</sup>C NMR of 2P (101 MHz, CDCl<sub>3</sub>)

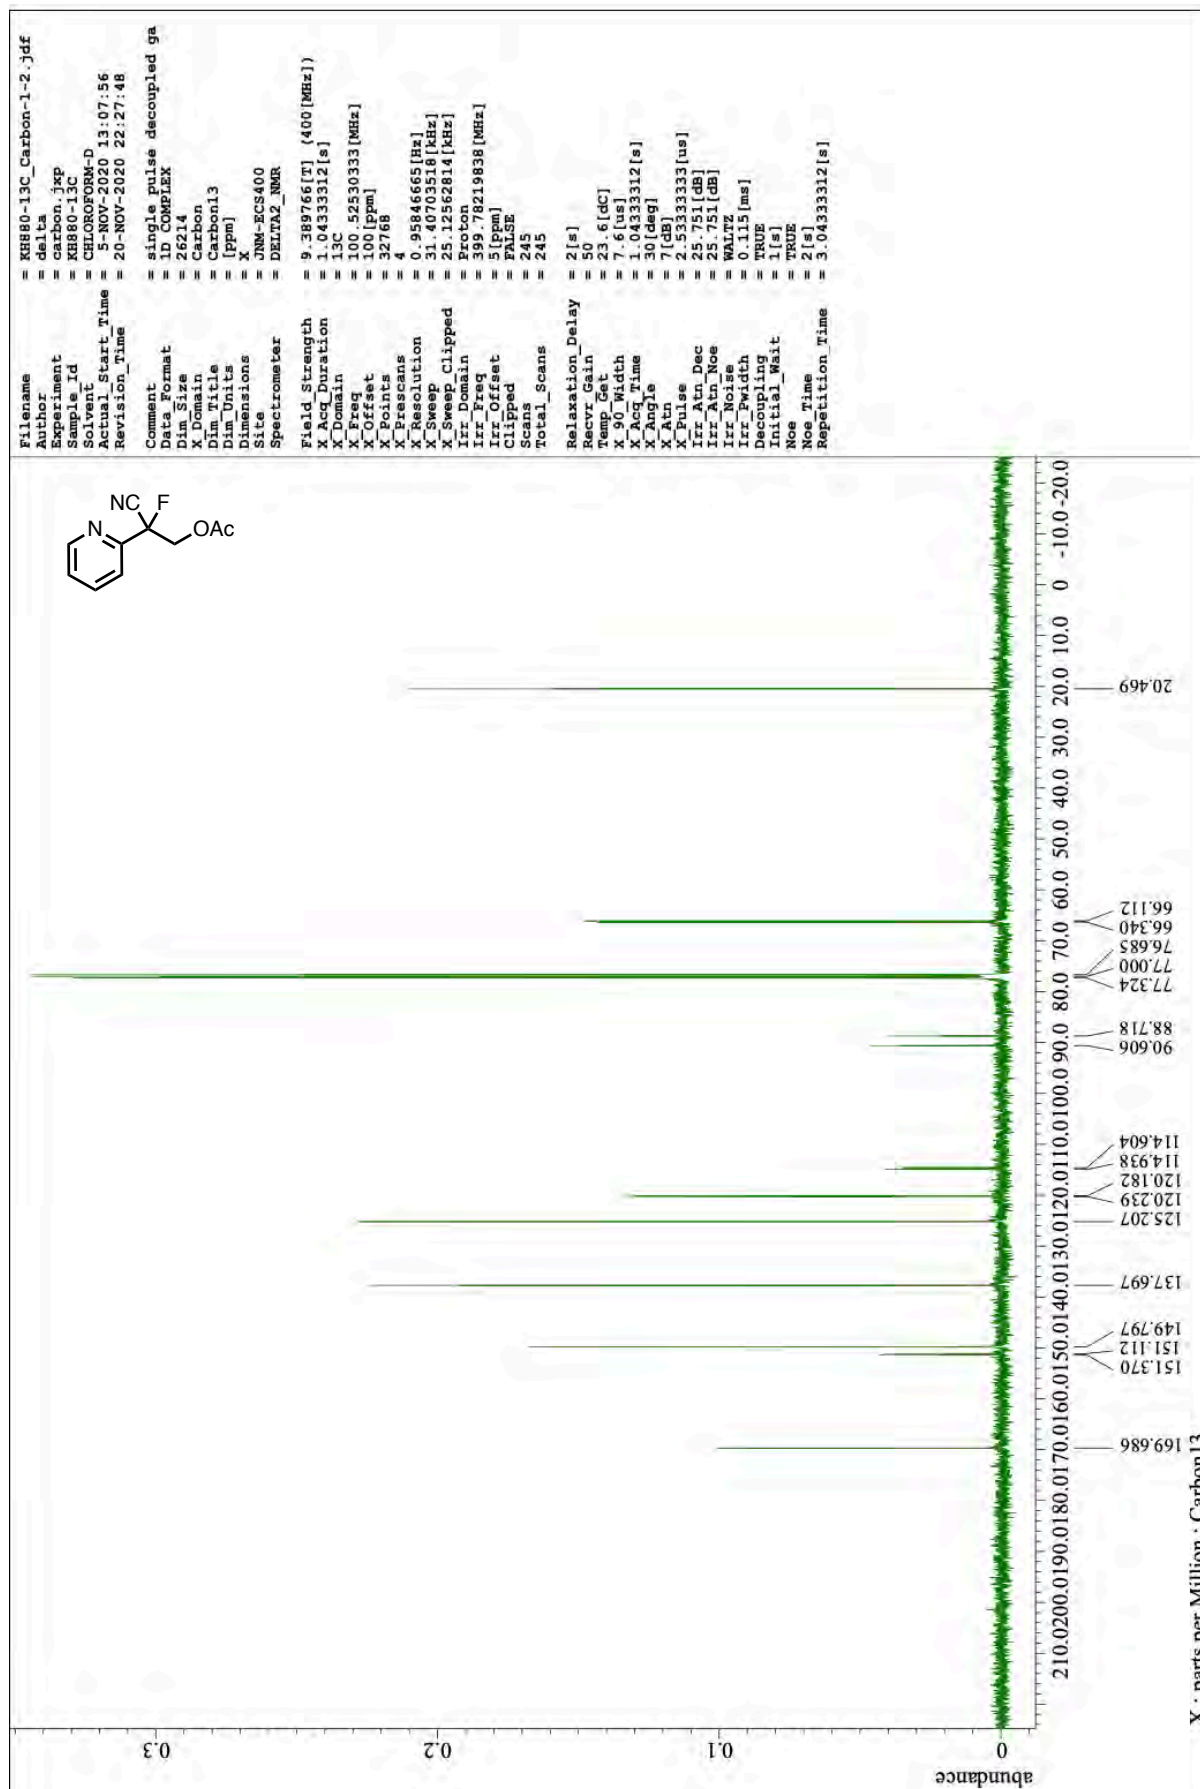



<sup>19</sup>F NMR of 2P (376 MHz, CDCl<sub>3</sub>)

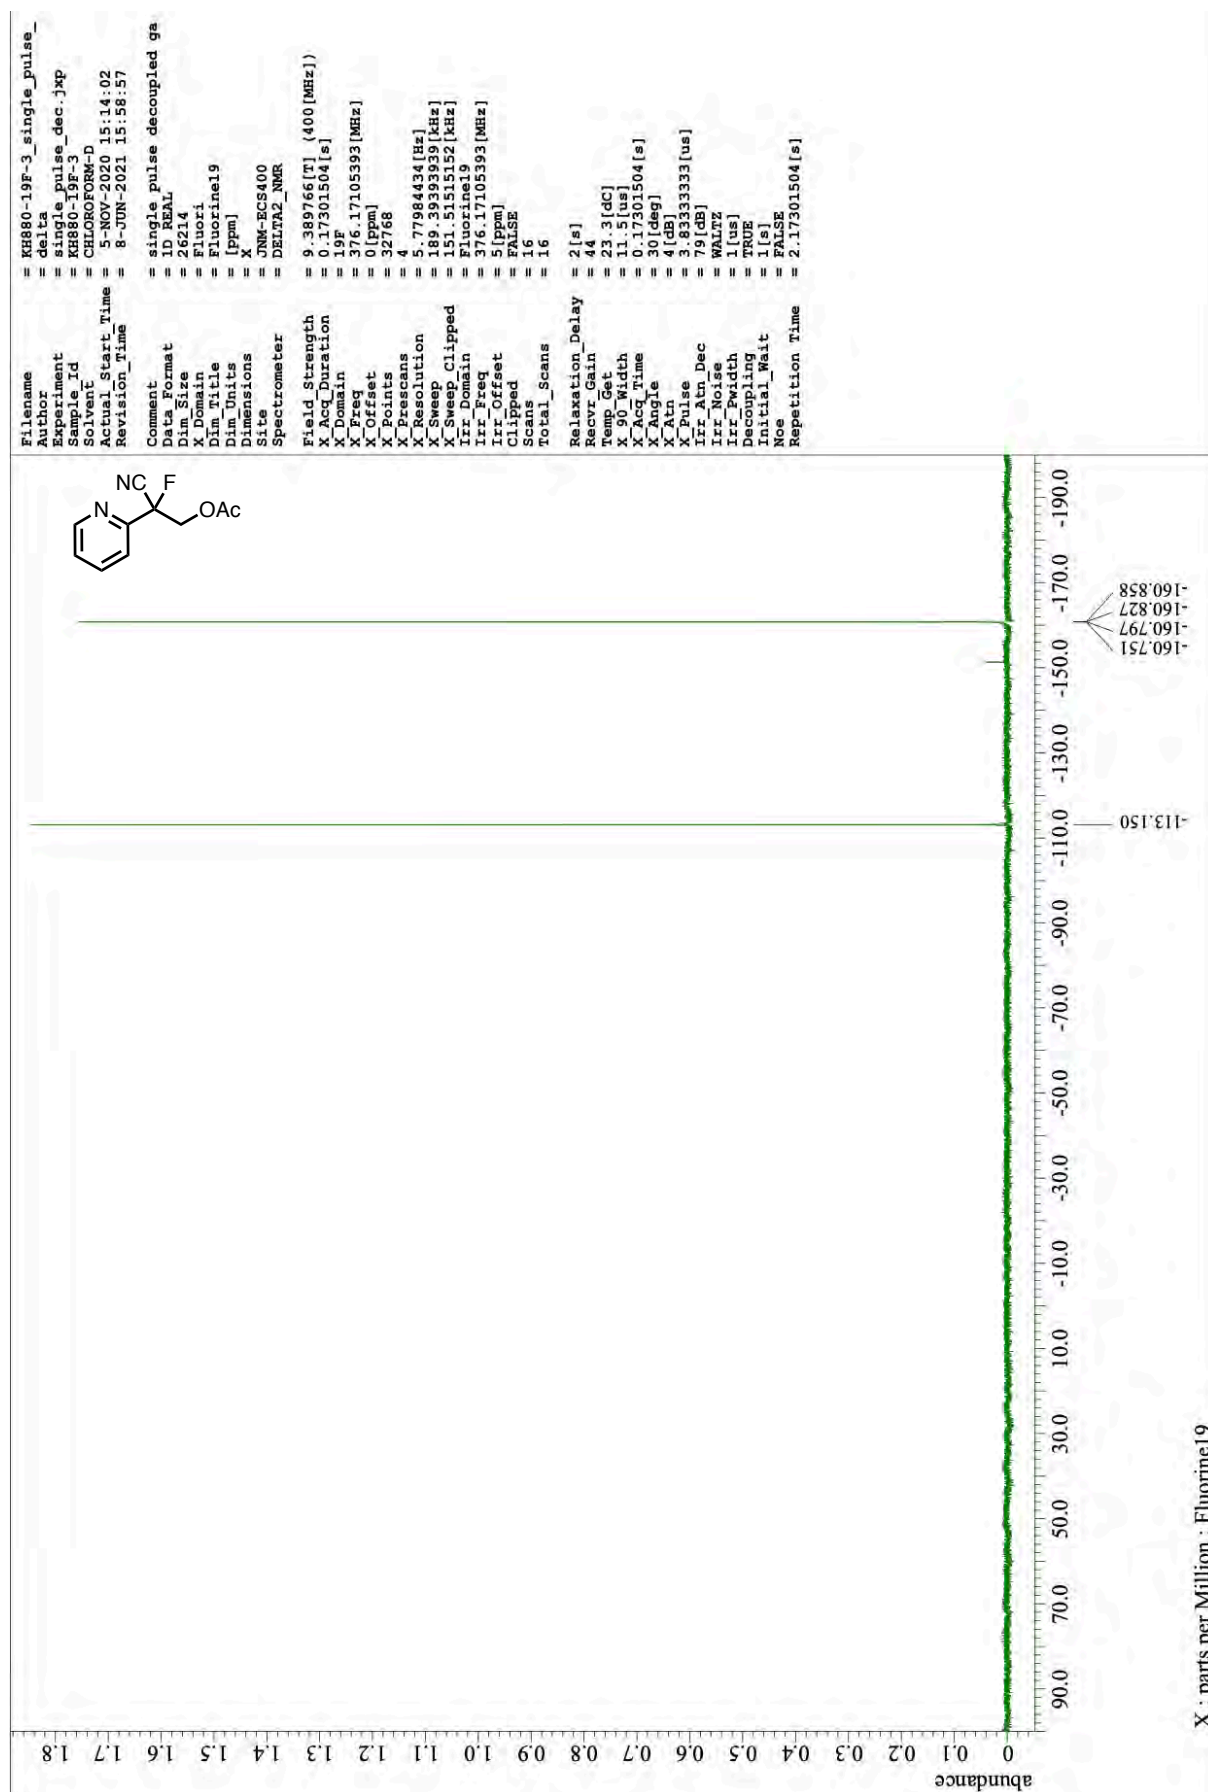

<sup>1</sup>H NMR of 2Q (400 MHz, CDCl<sub>3</sub>)

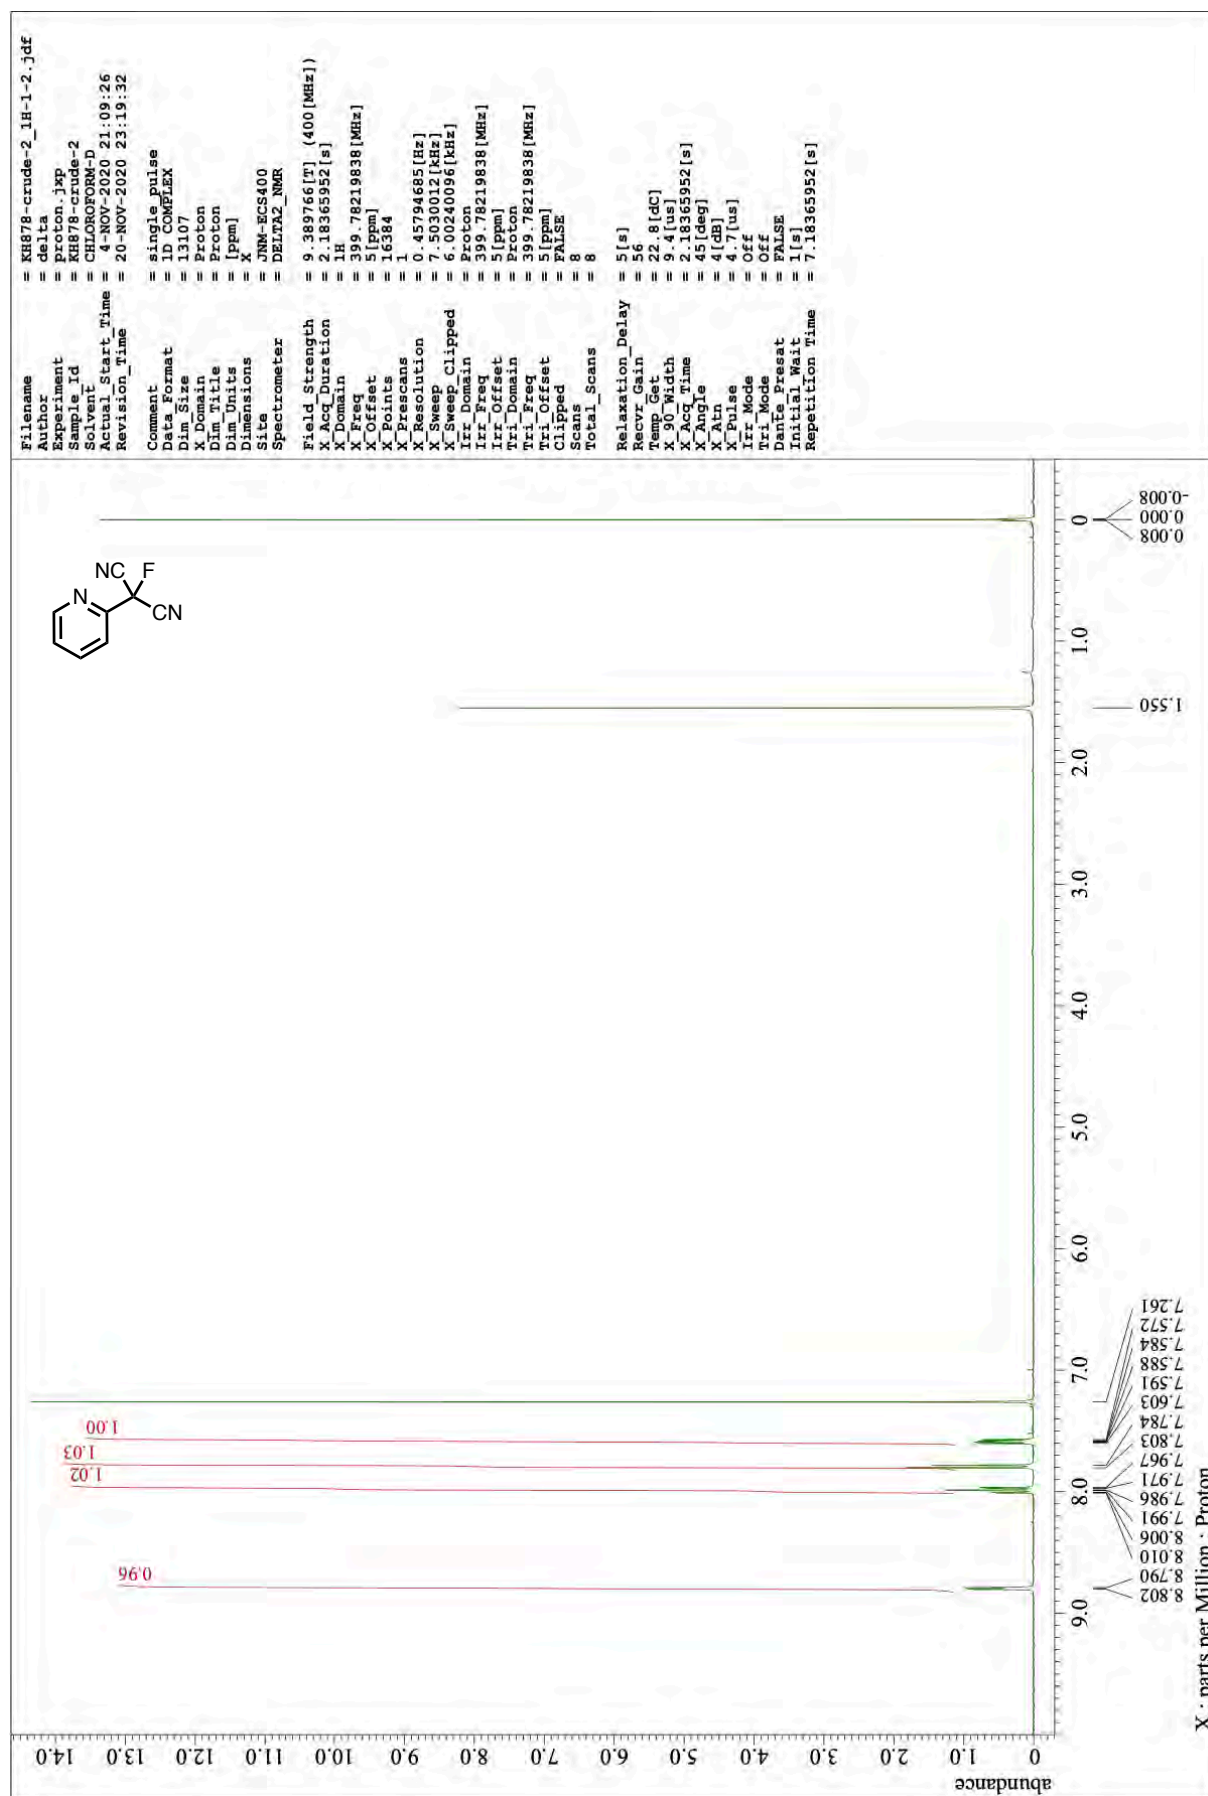

<sup>13</sup>C NMR of 2Q (101 MHz, CDCl<sub>3</sub>)

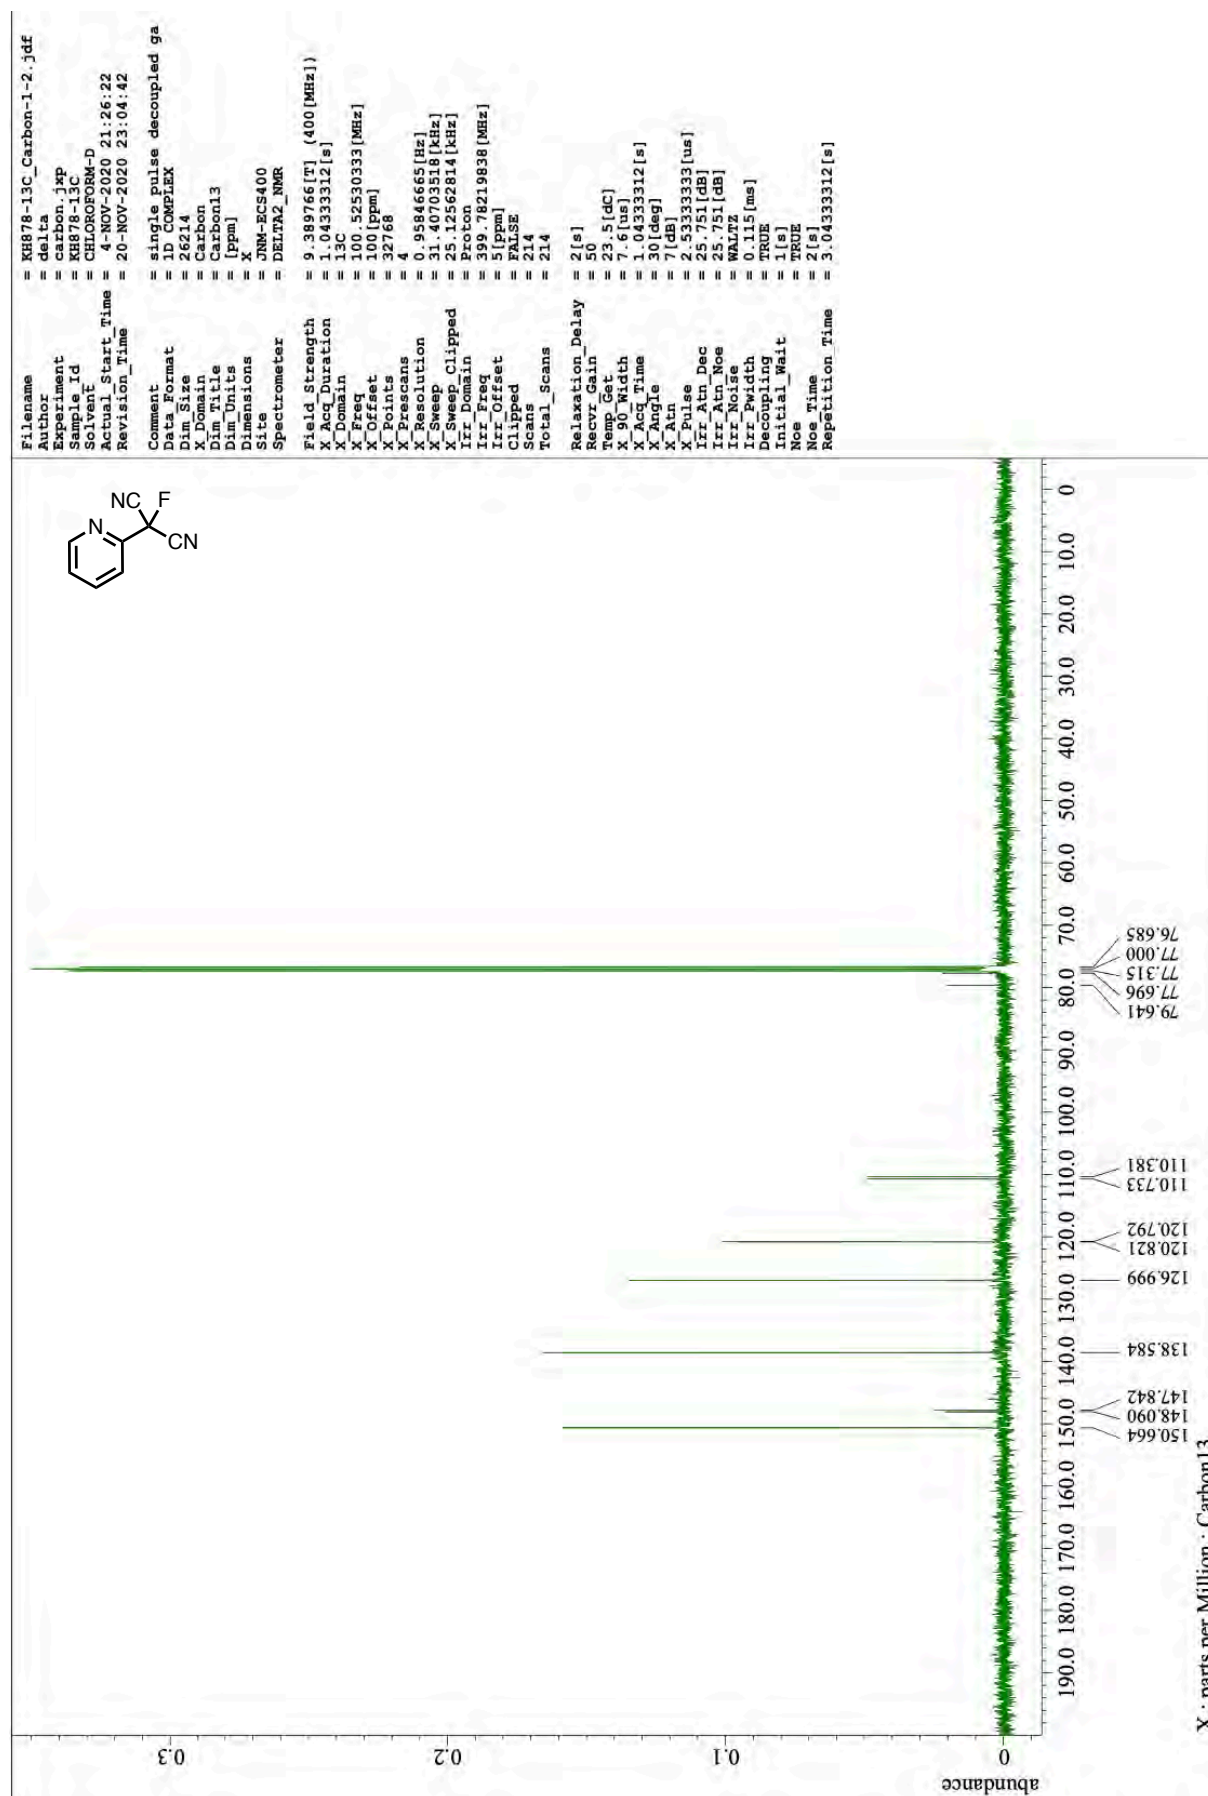

<sup>19</sup>F NMR of 2Q (376 MHz, CDCl<sub>3</sub>)

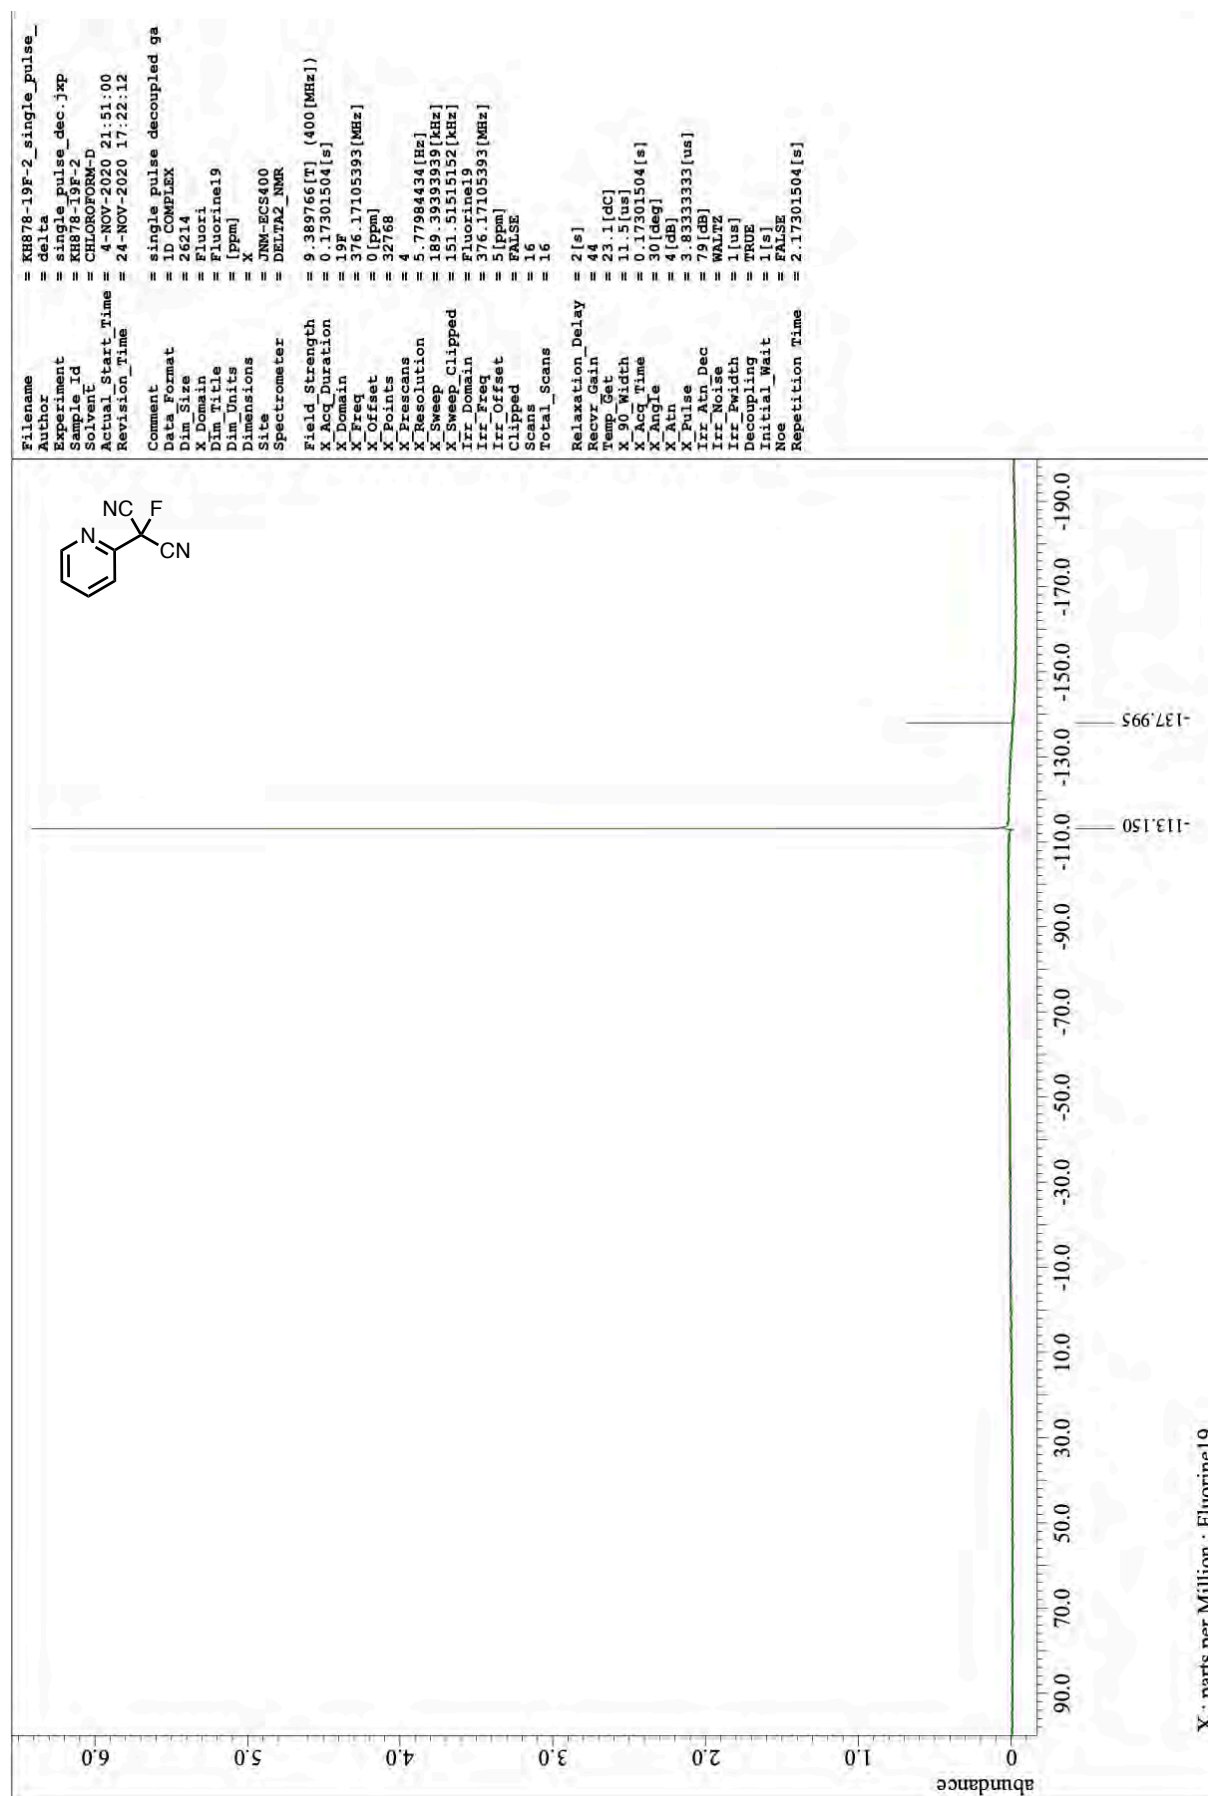

<sup>1</sup>H NMR of 2R (400 MHz, CDCl<sub>3</sub>)

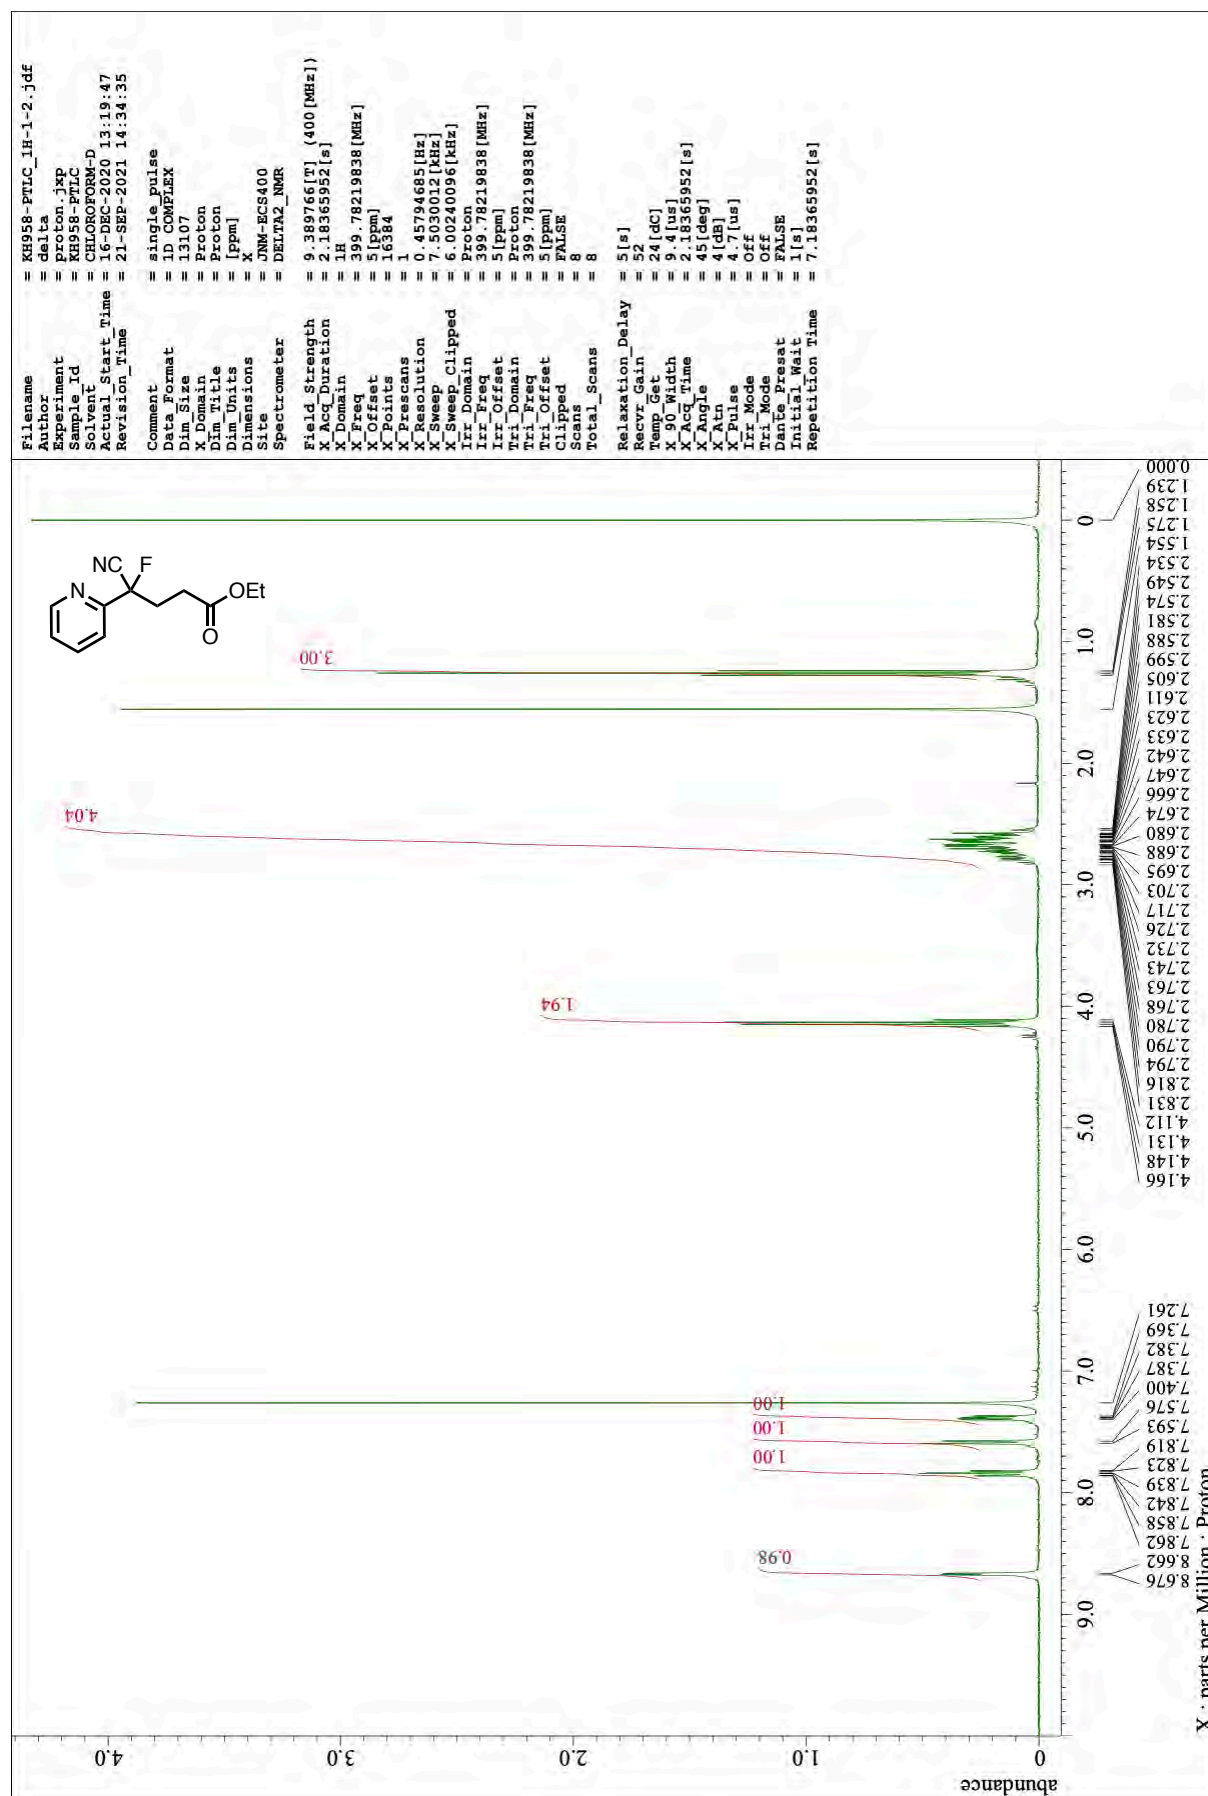

<sup>13</sup>C NMR of 2R (101 MHz, CDCl<sub>3</sub>)

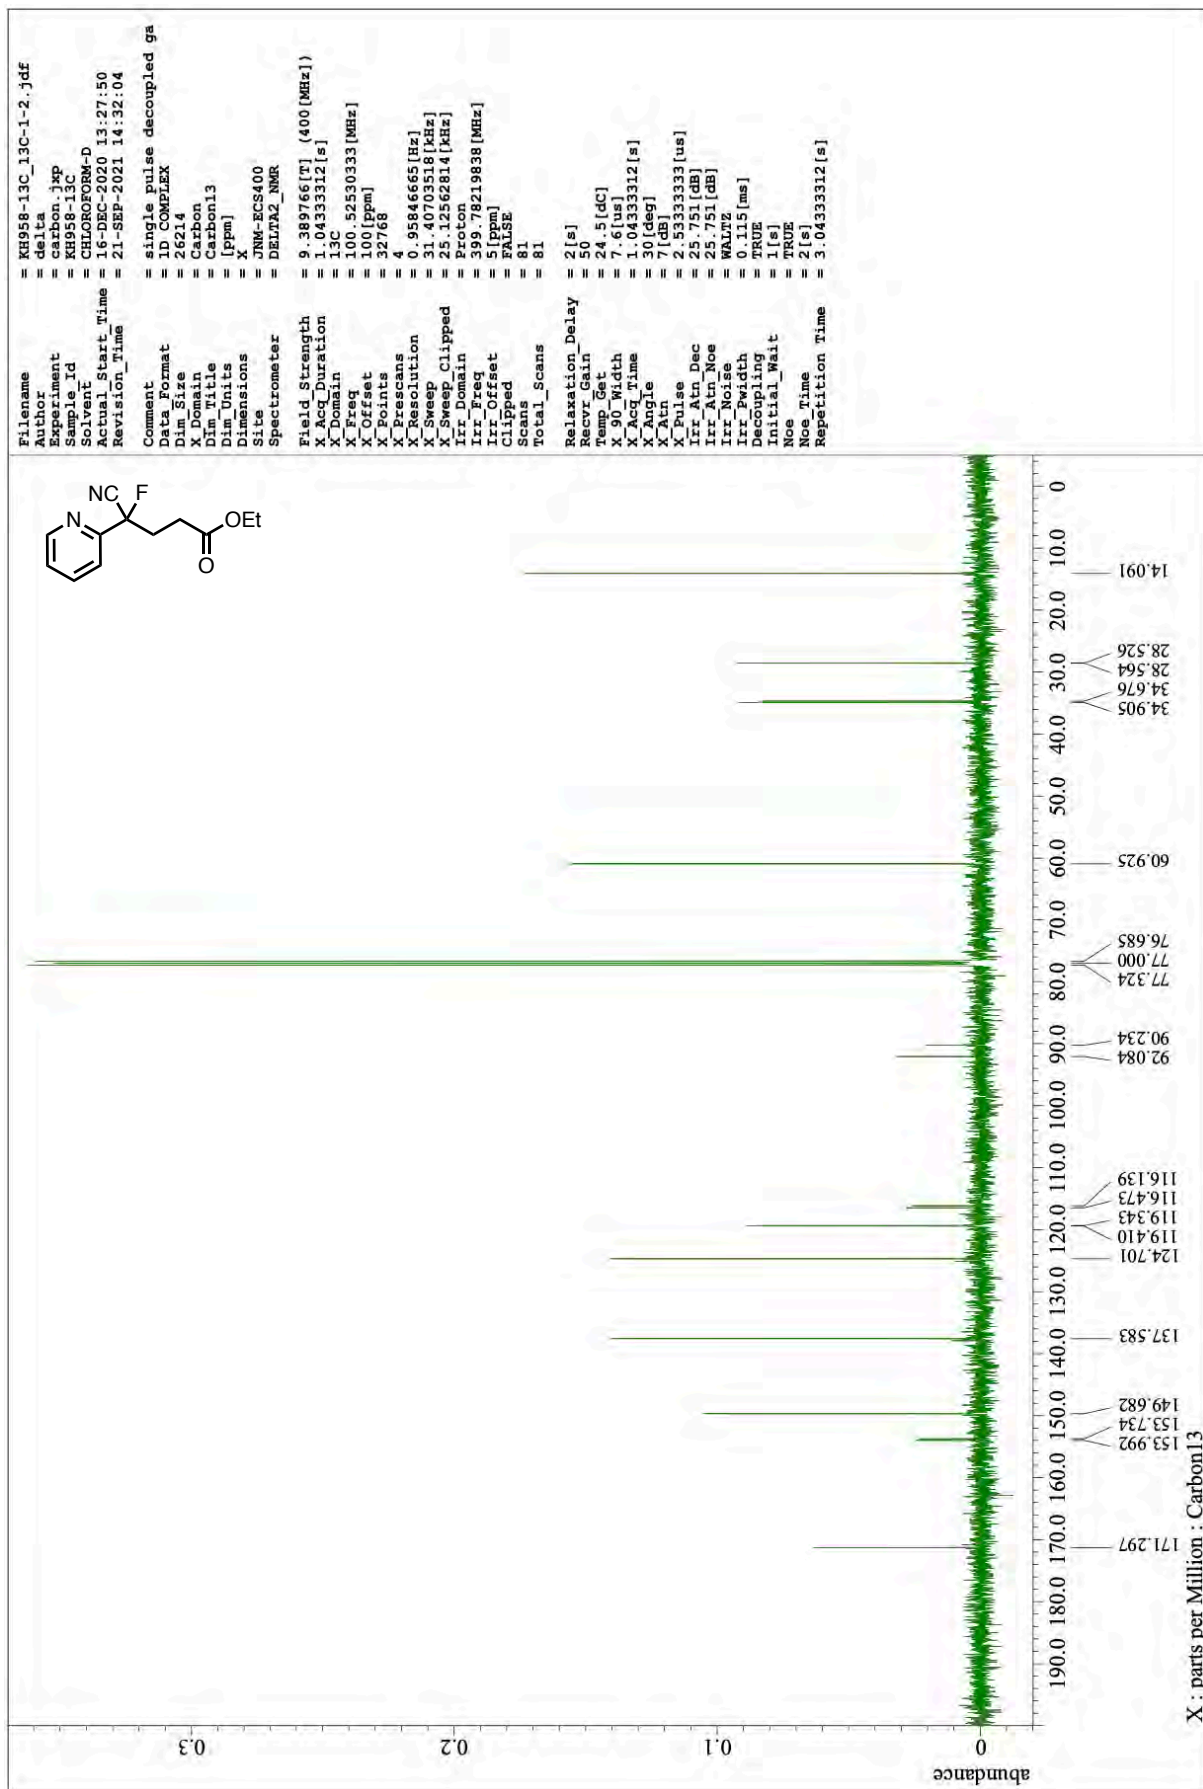

<sup>19</sup>F NMR of 2R (376 MHz, CDCl<sub>3</sub>)

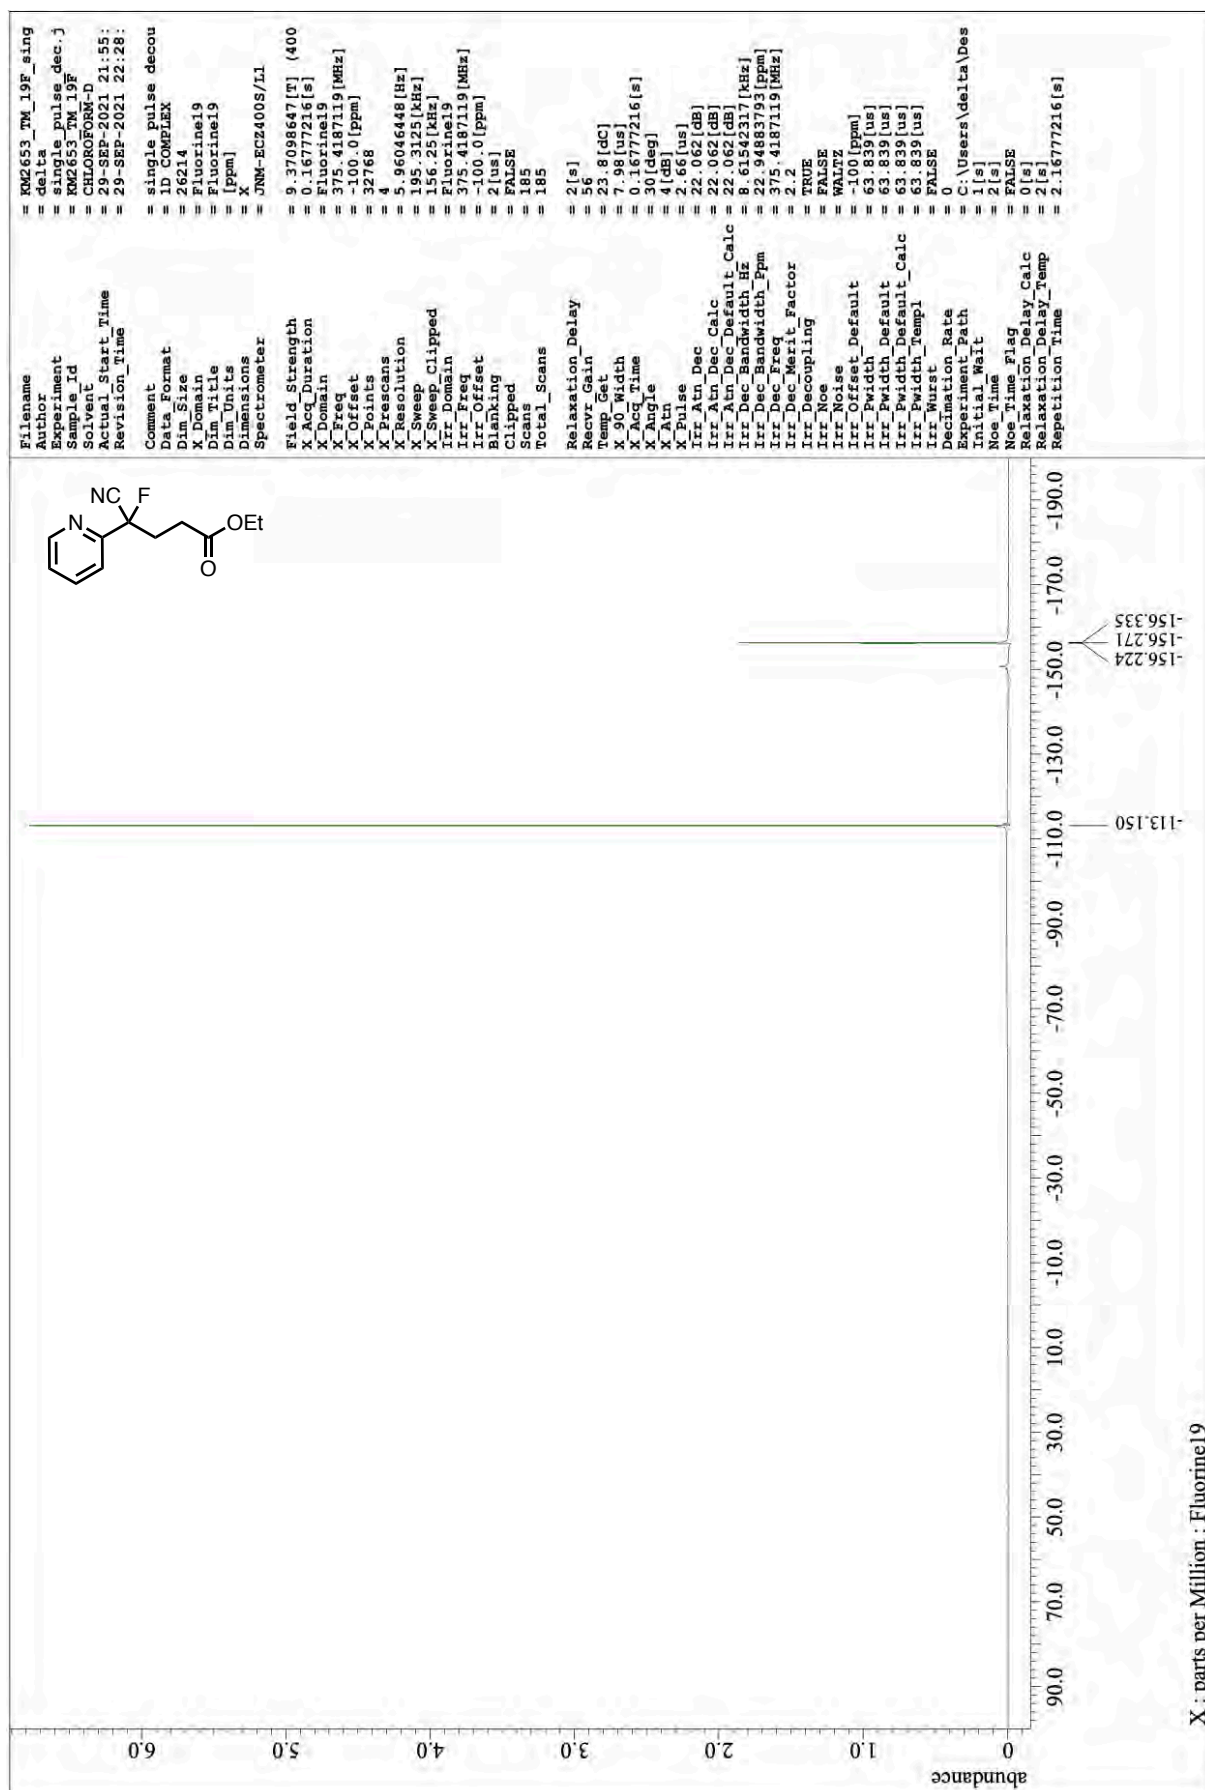

<sup>1</sup>H NMR of 2S (400 MHz, CDCl<sub>3</sub>)

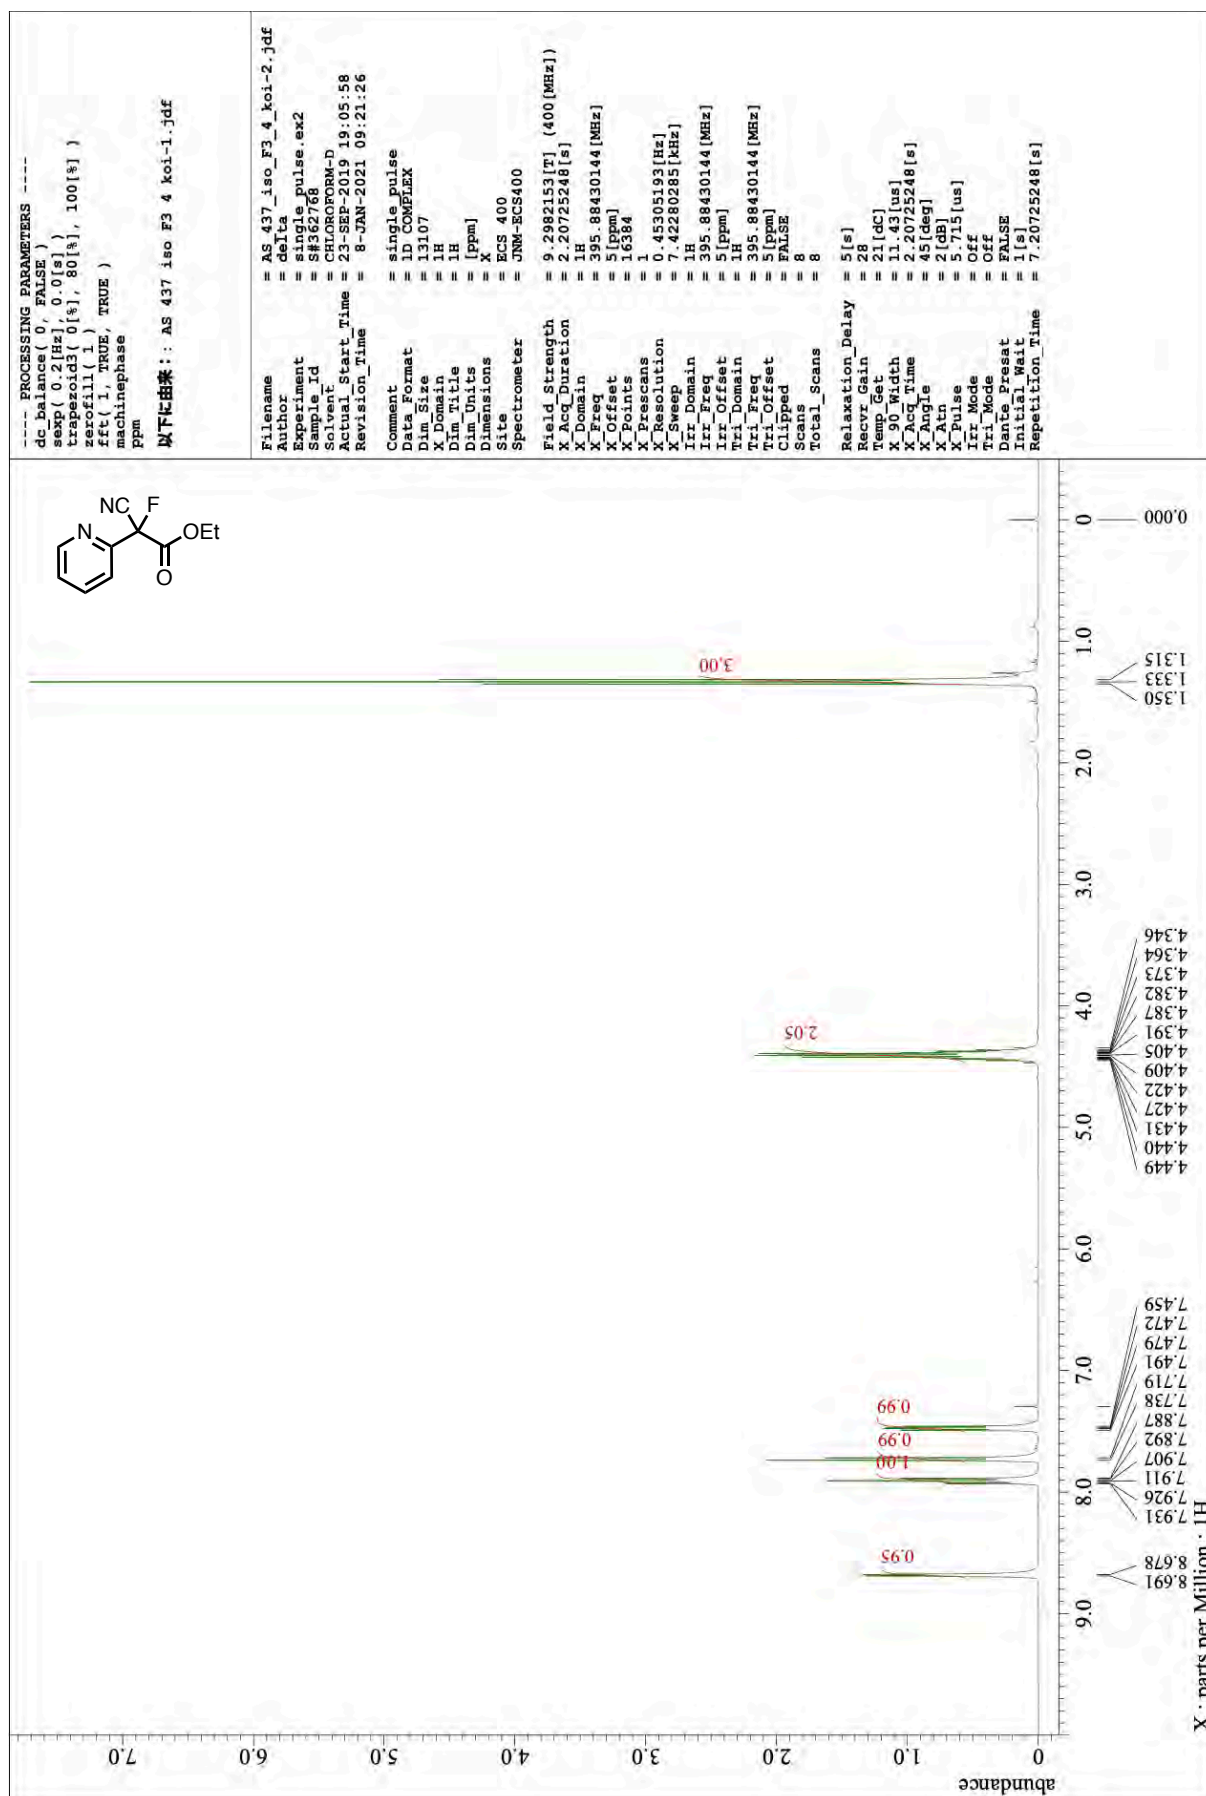



<sup>13</sup>C NMR of 2S (101 MHz, CDCl<sub>3</sub>)

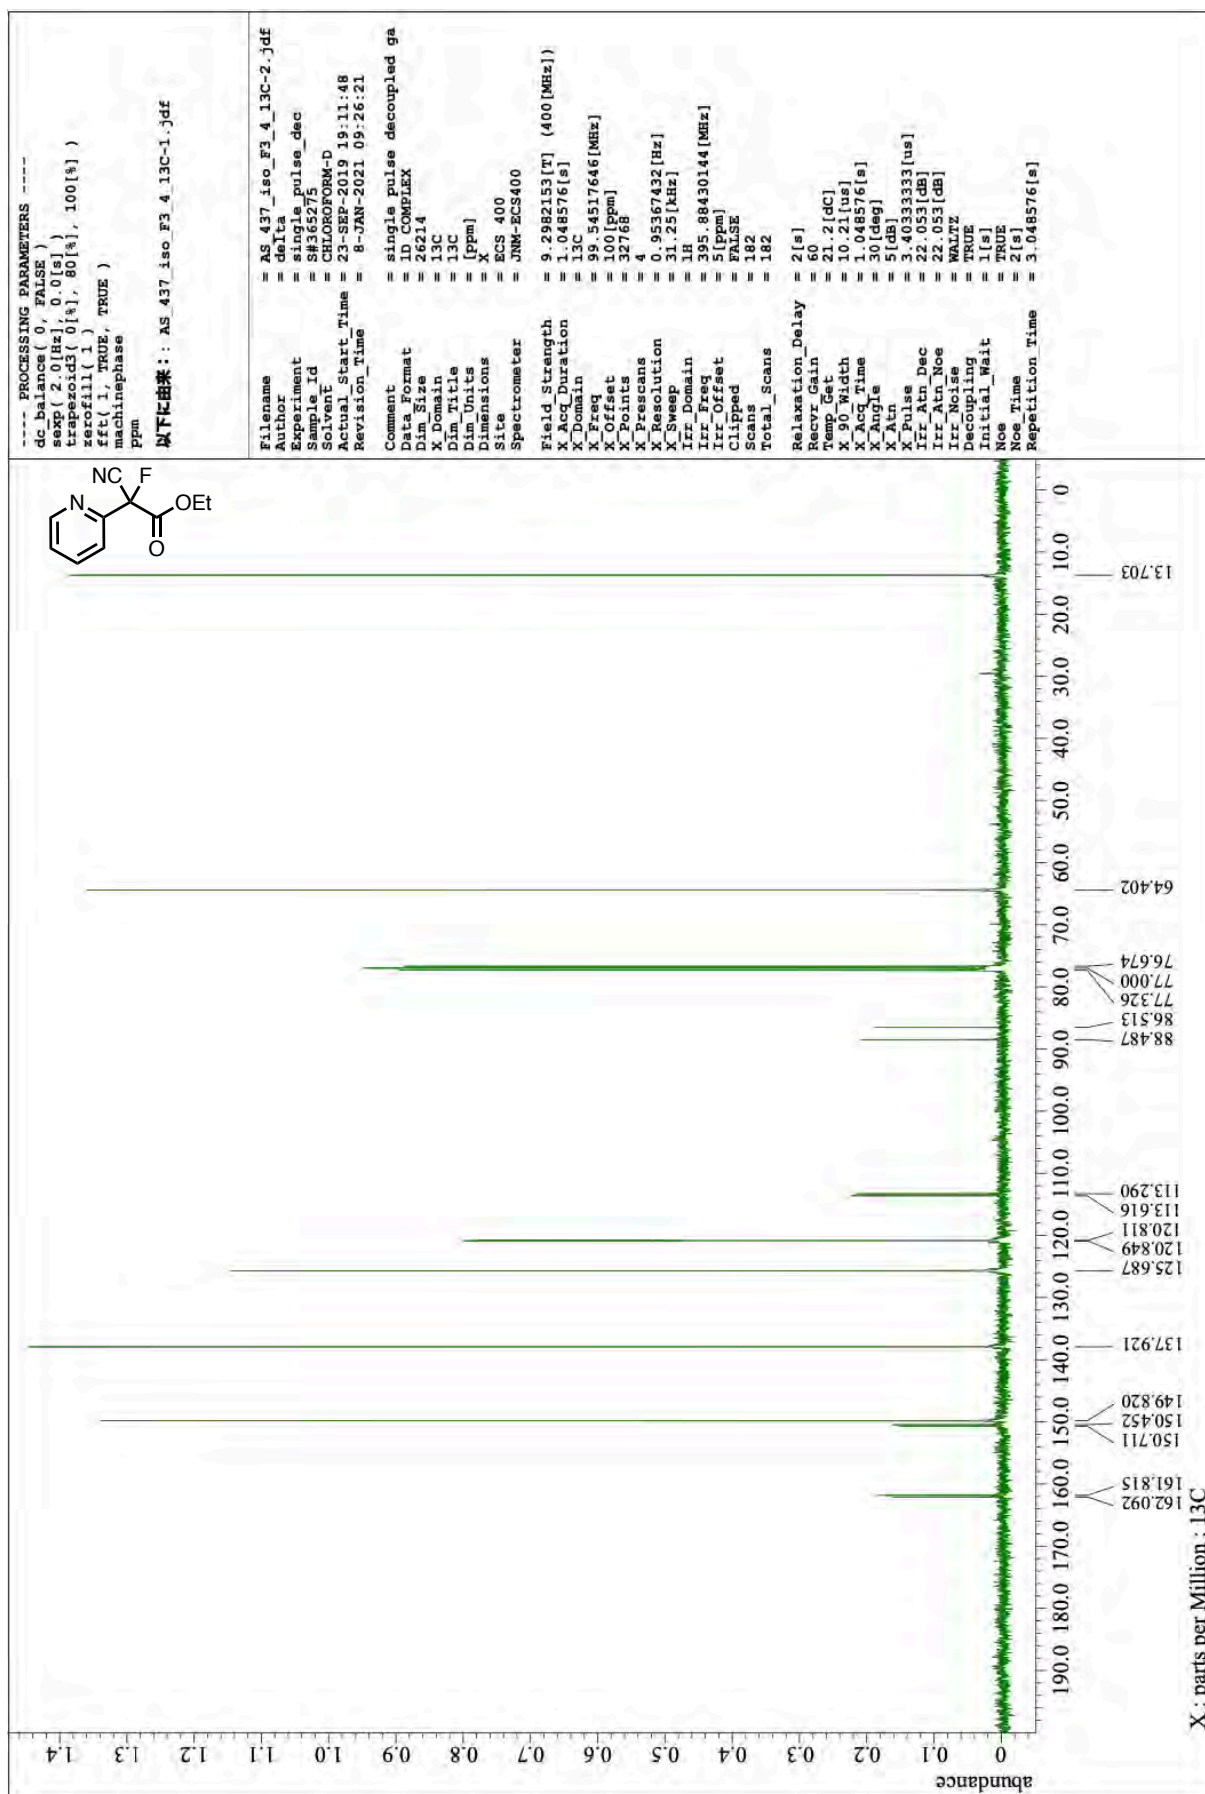

<sup>19</sup>F NMR of 2S (376 MHz, CDCl<sub>3</sub>)

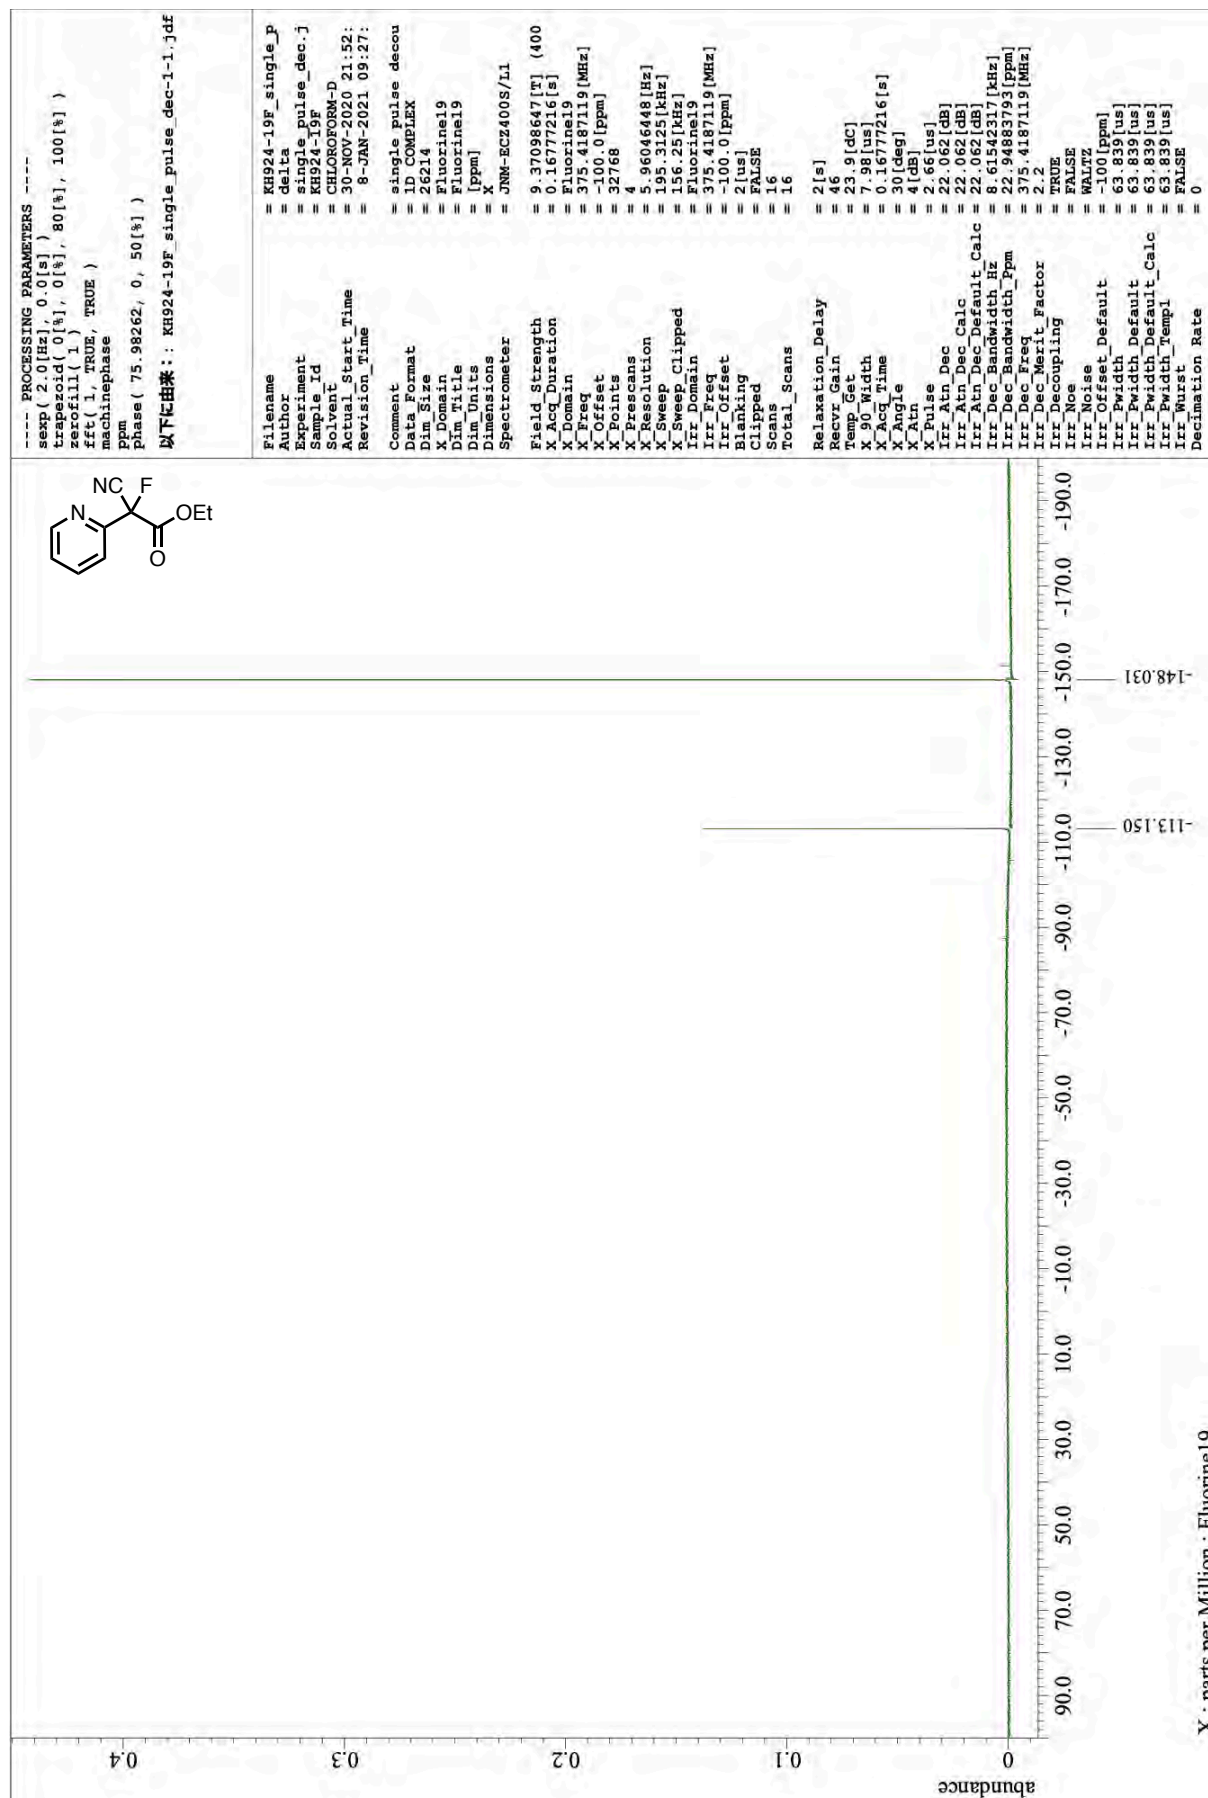

<sup>1</sup>H NMR of 2T (400 MHz, CDCl<sub>3</sub>)

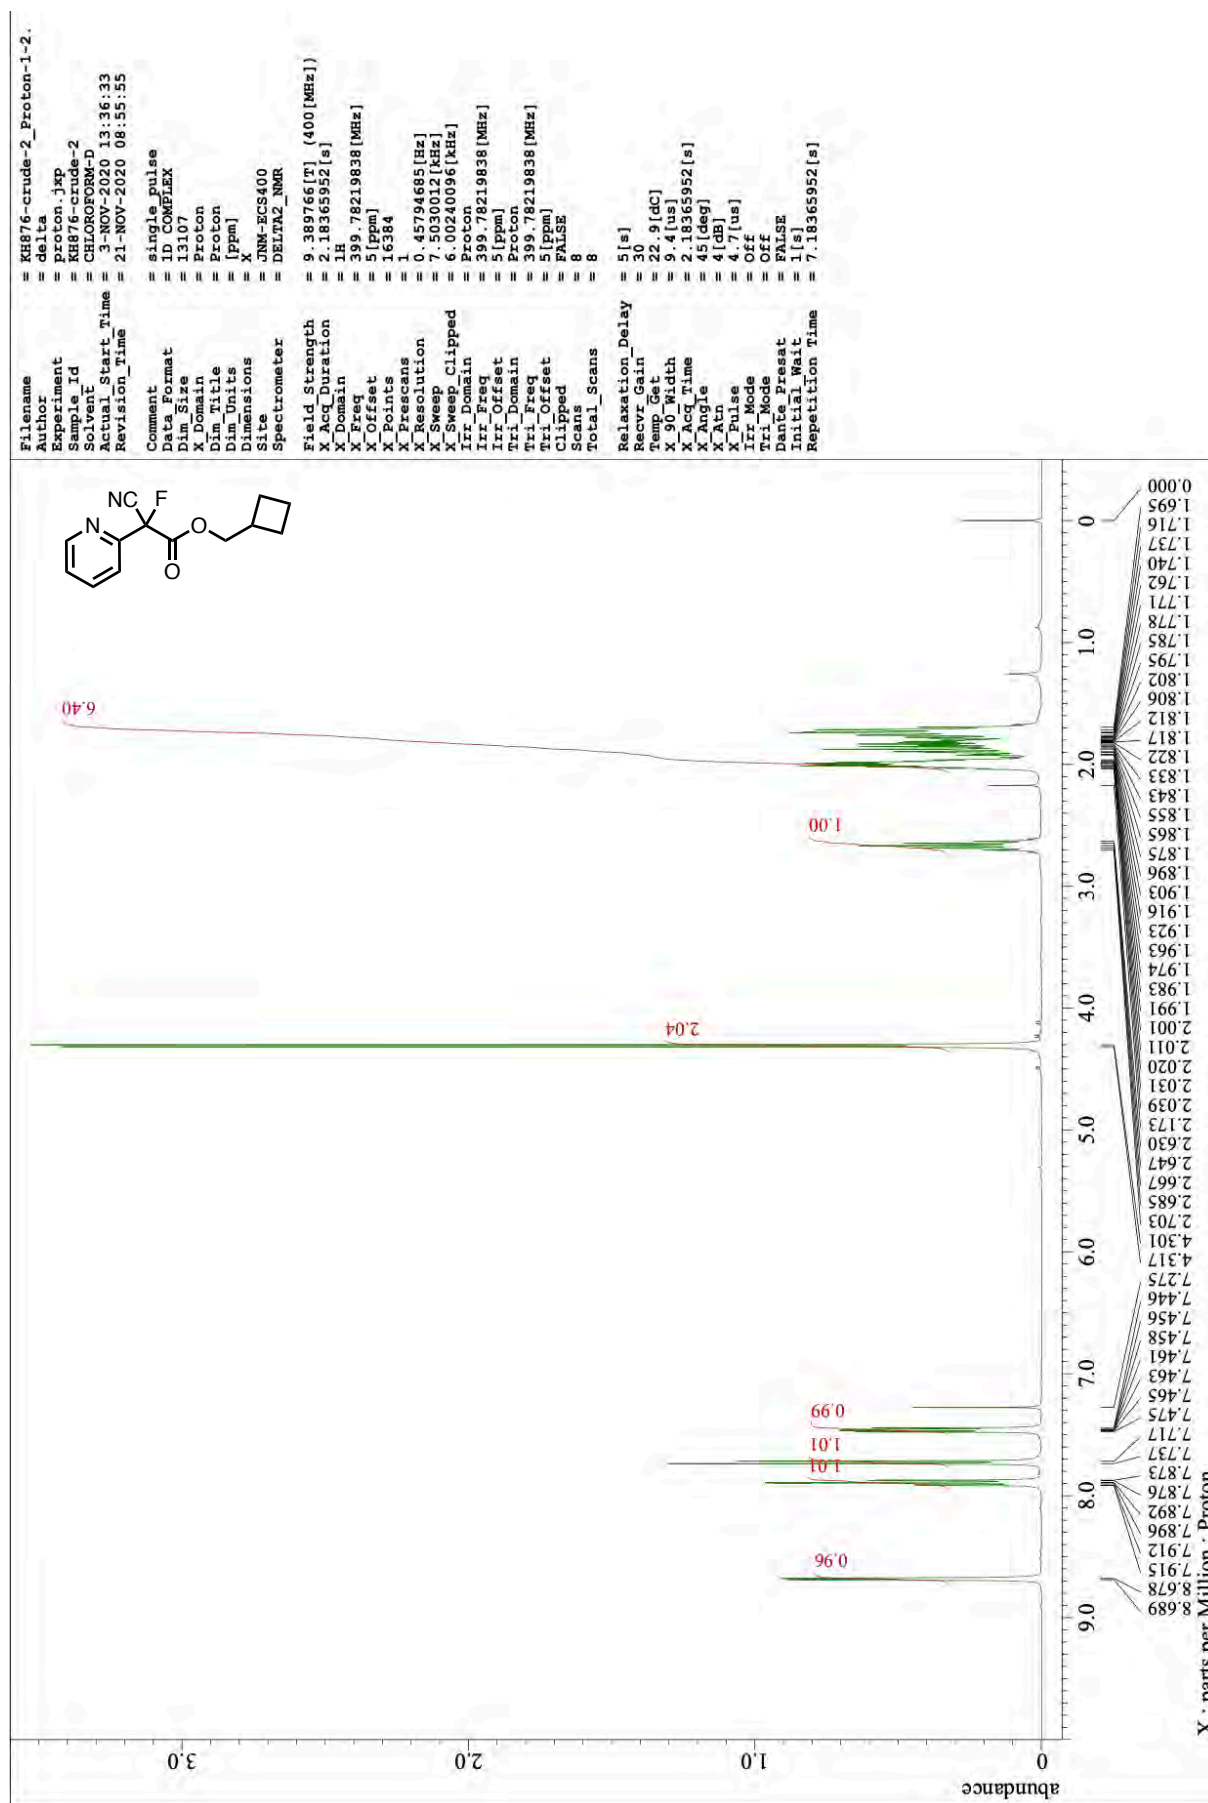

<sup>13</sup>C NMR of 2T (101 MHz, CDCl<sub>3</sub>)

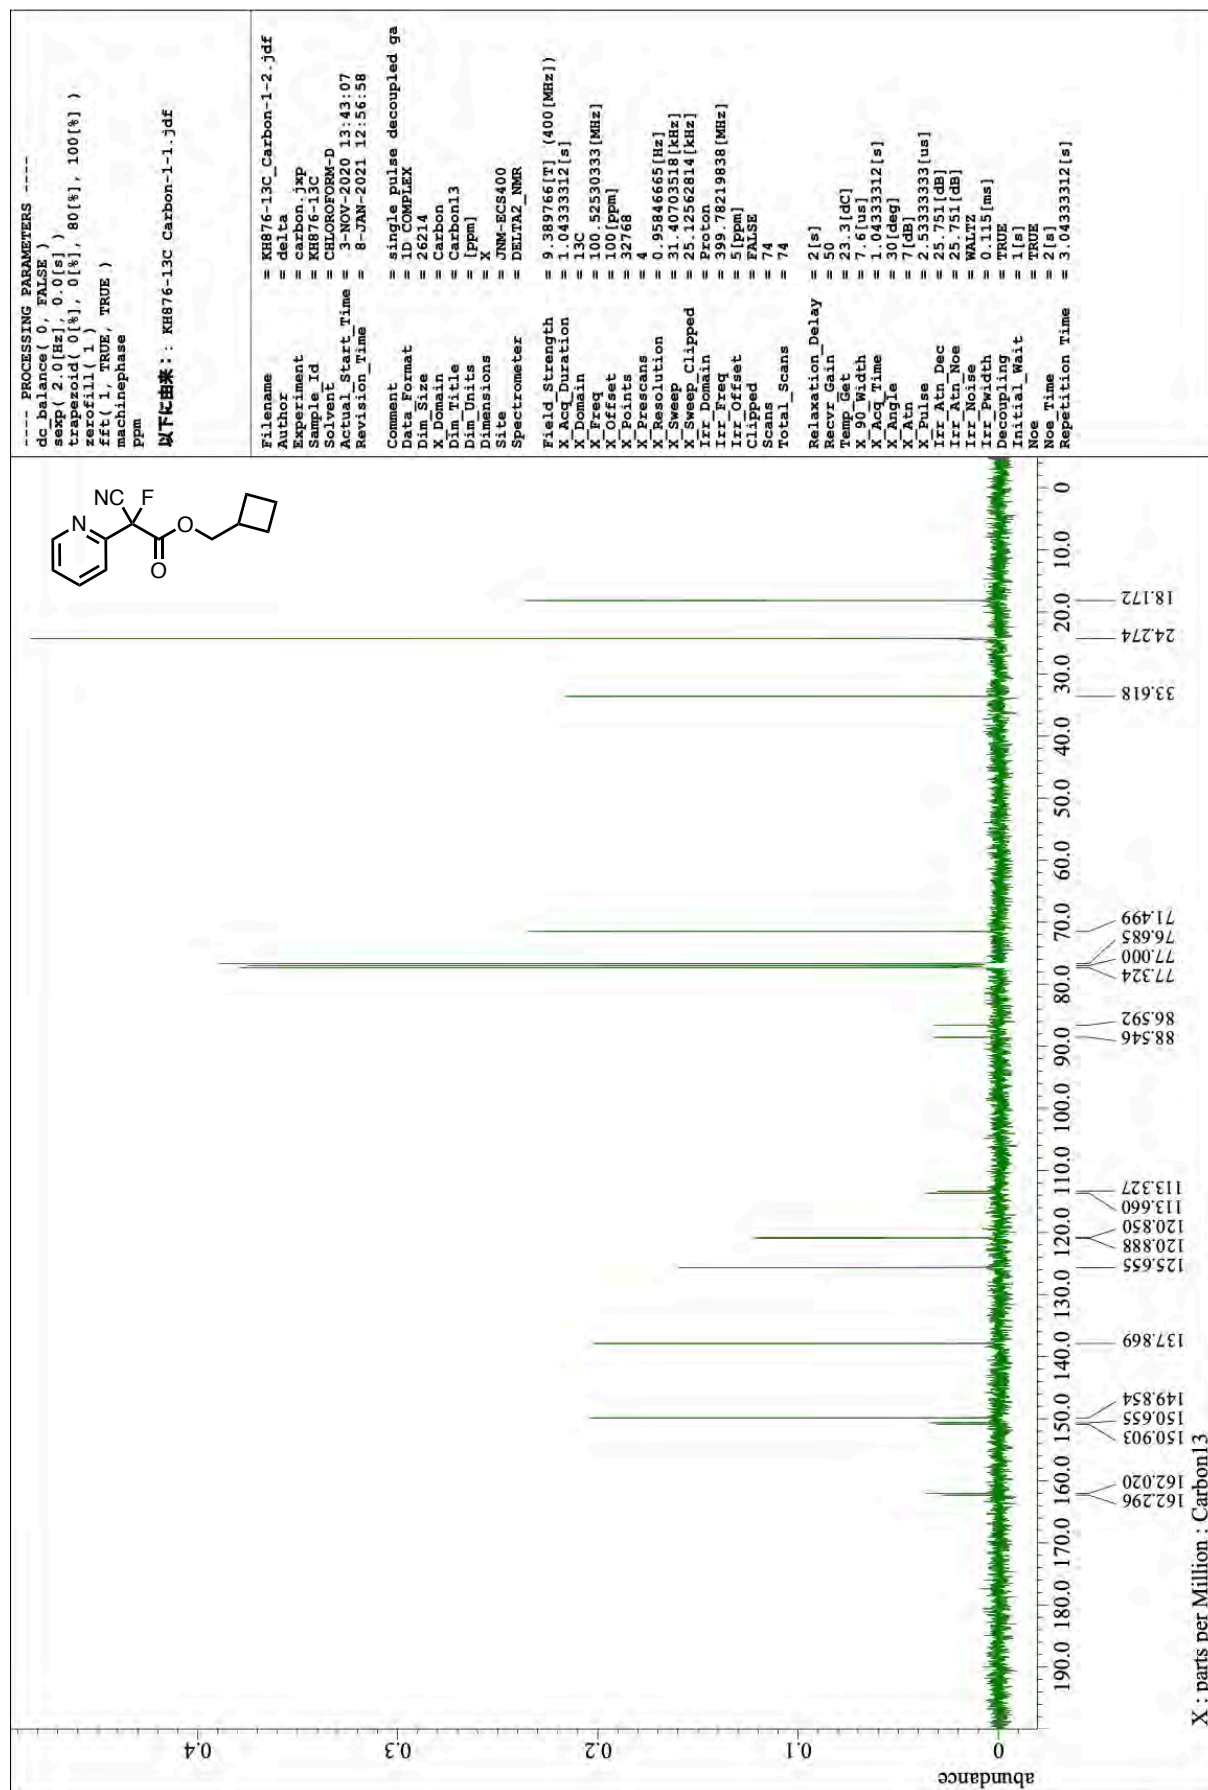

<sup>19</sup>F NMR of 2T (376 MHz, CDCl<sub>3</sub>)

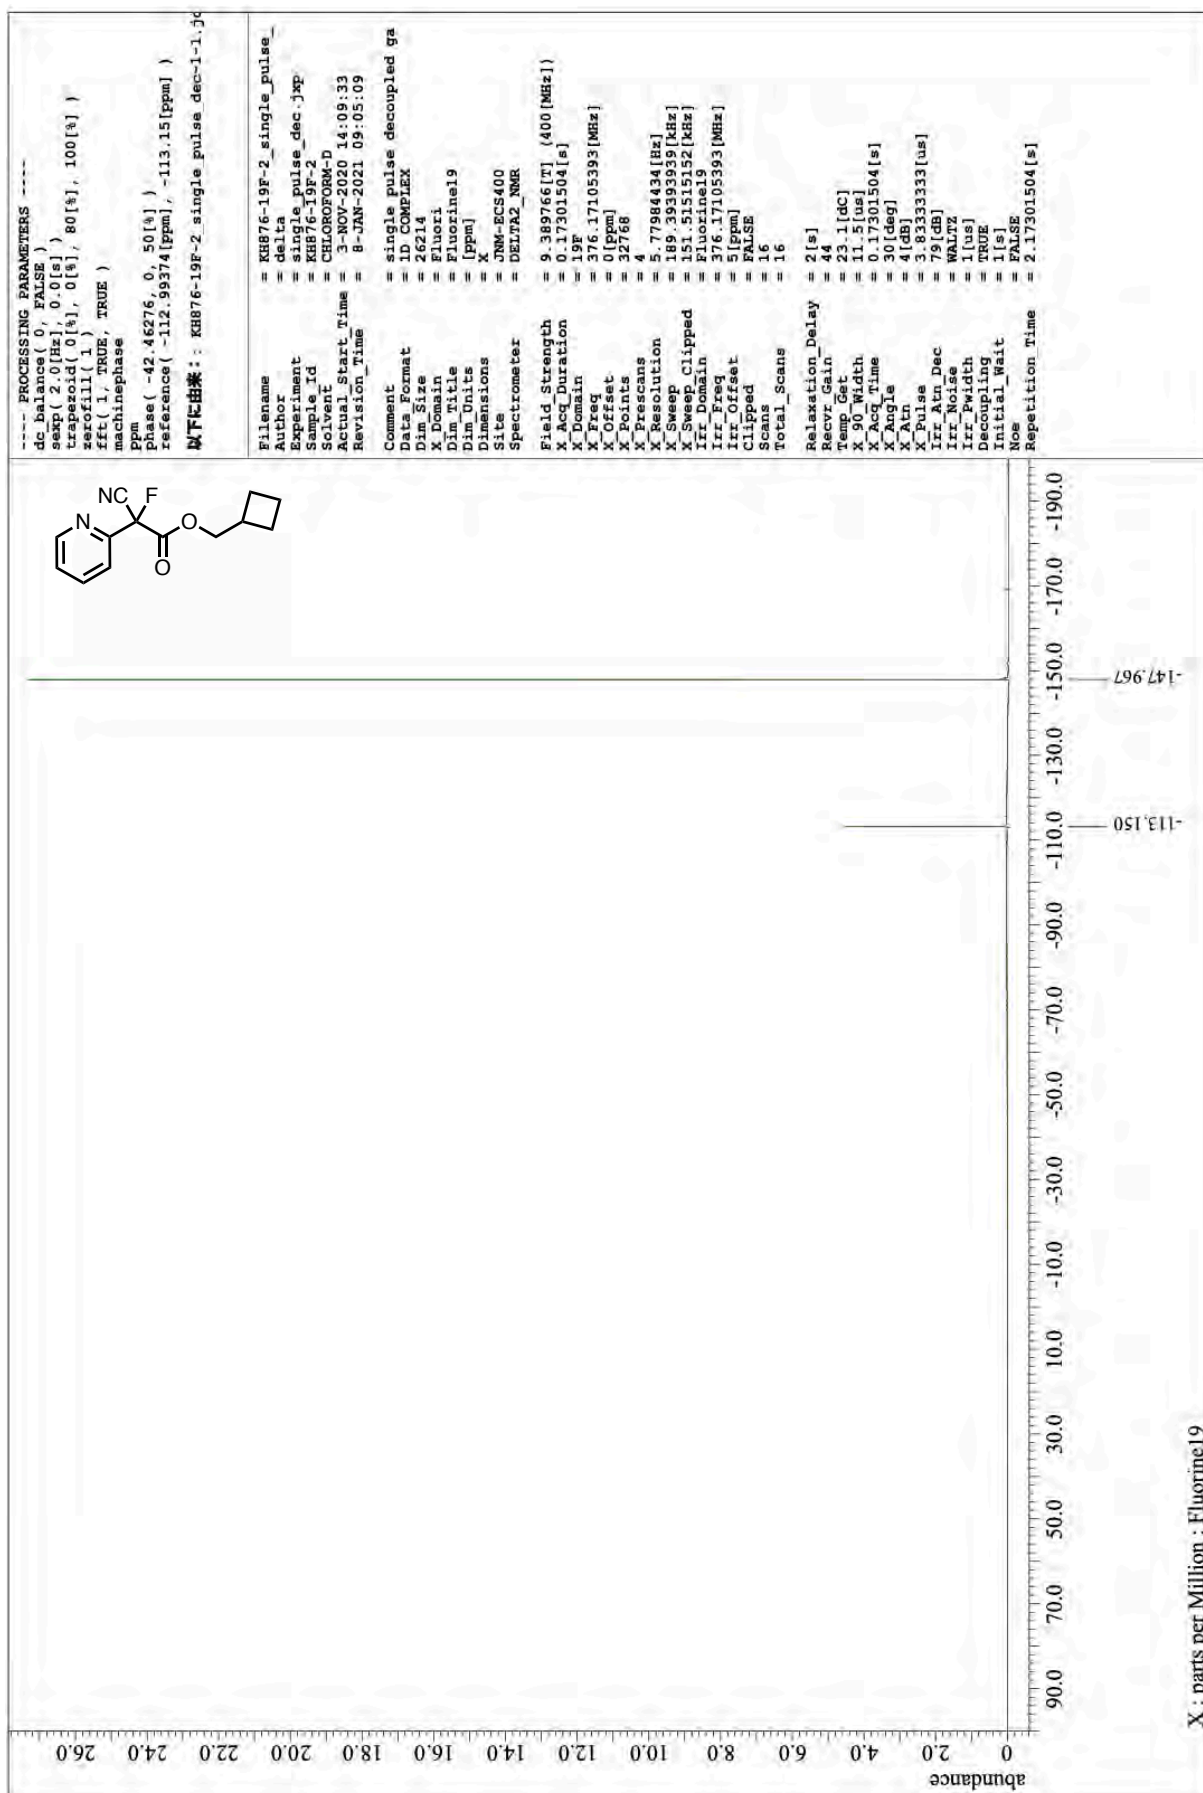

<sup>1</sup>H NMR of 2U (400 MHz, CDCl<sub>3</sub>)

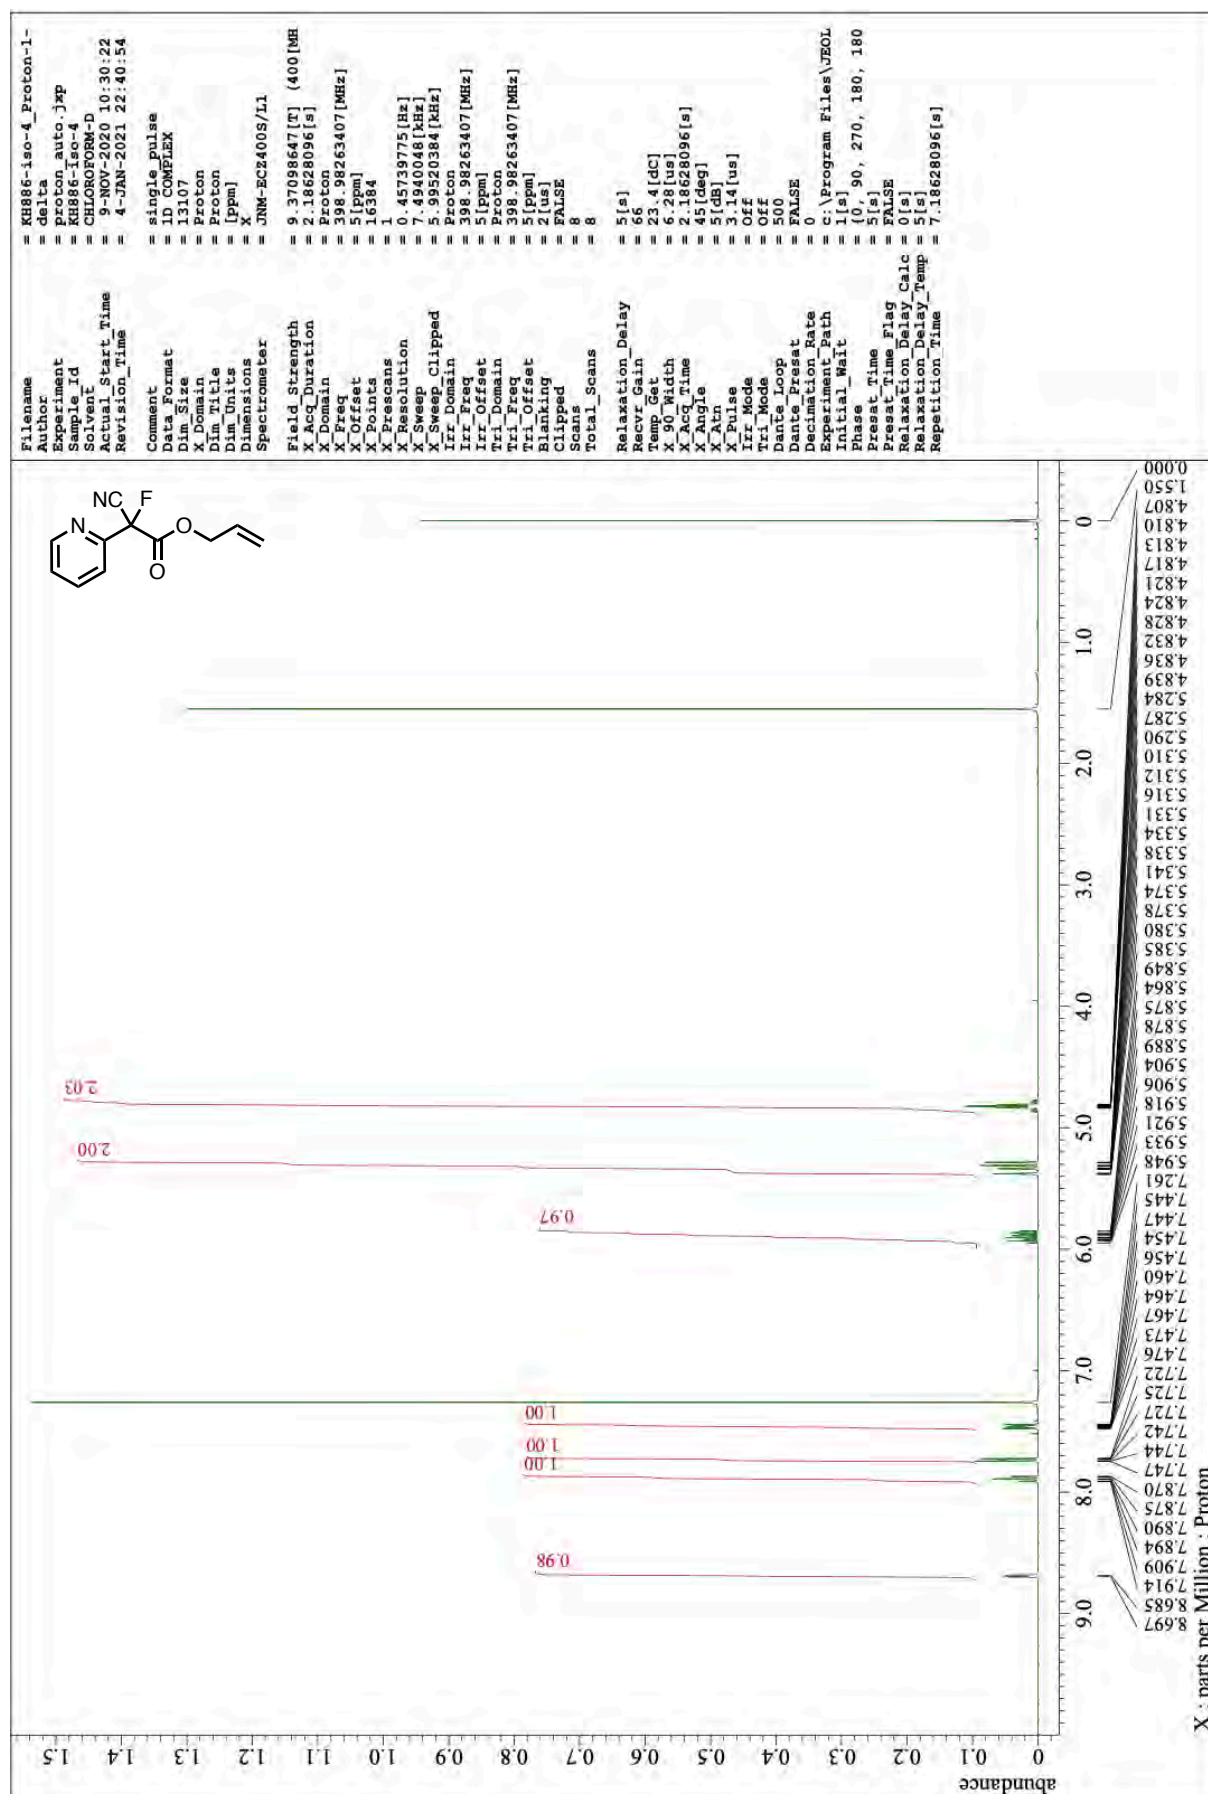

<sup>13</sup>C NMR of 2U (101 MHz, CDCl<sub>3</sub>)

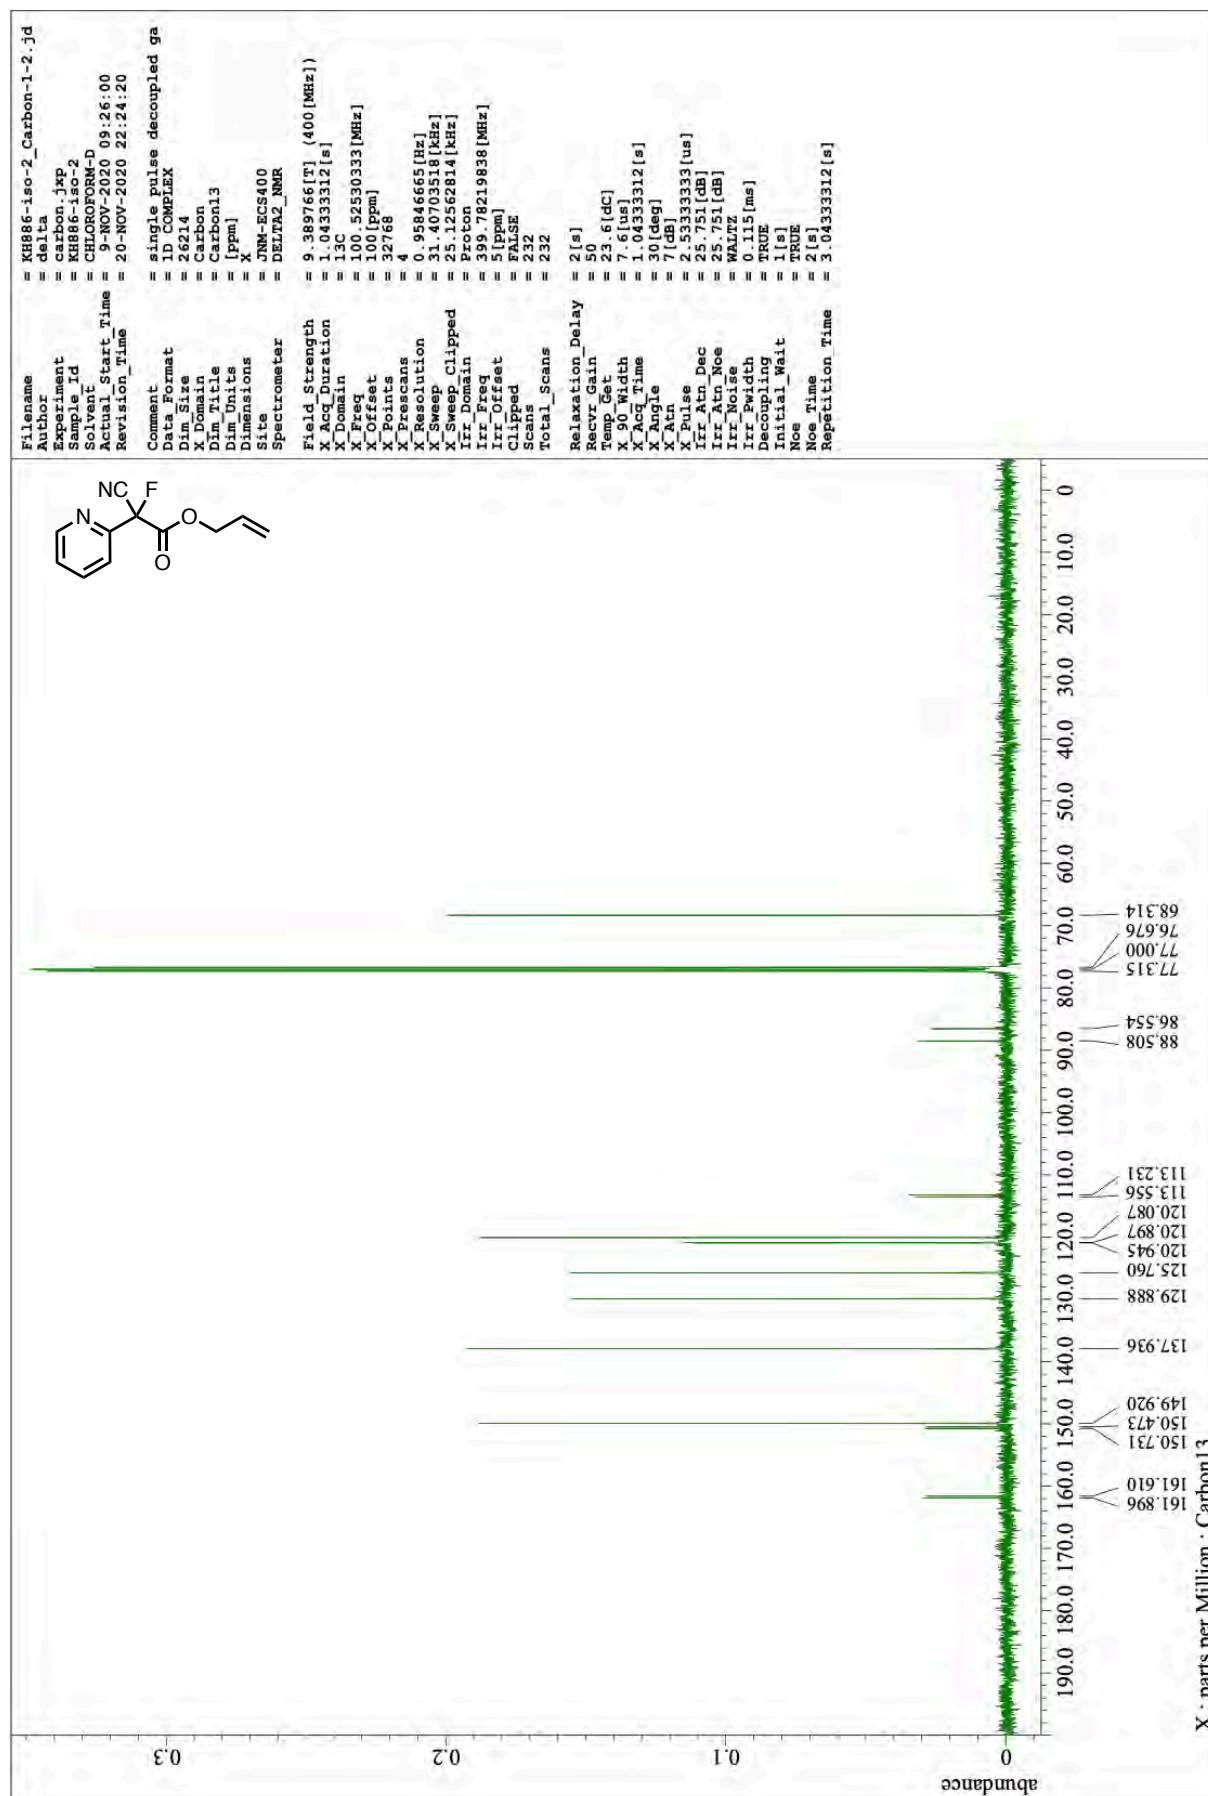

<sup>19</sup>F NMR of 2U (376 MHz, CDCl<sub>3</sub>)

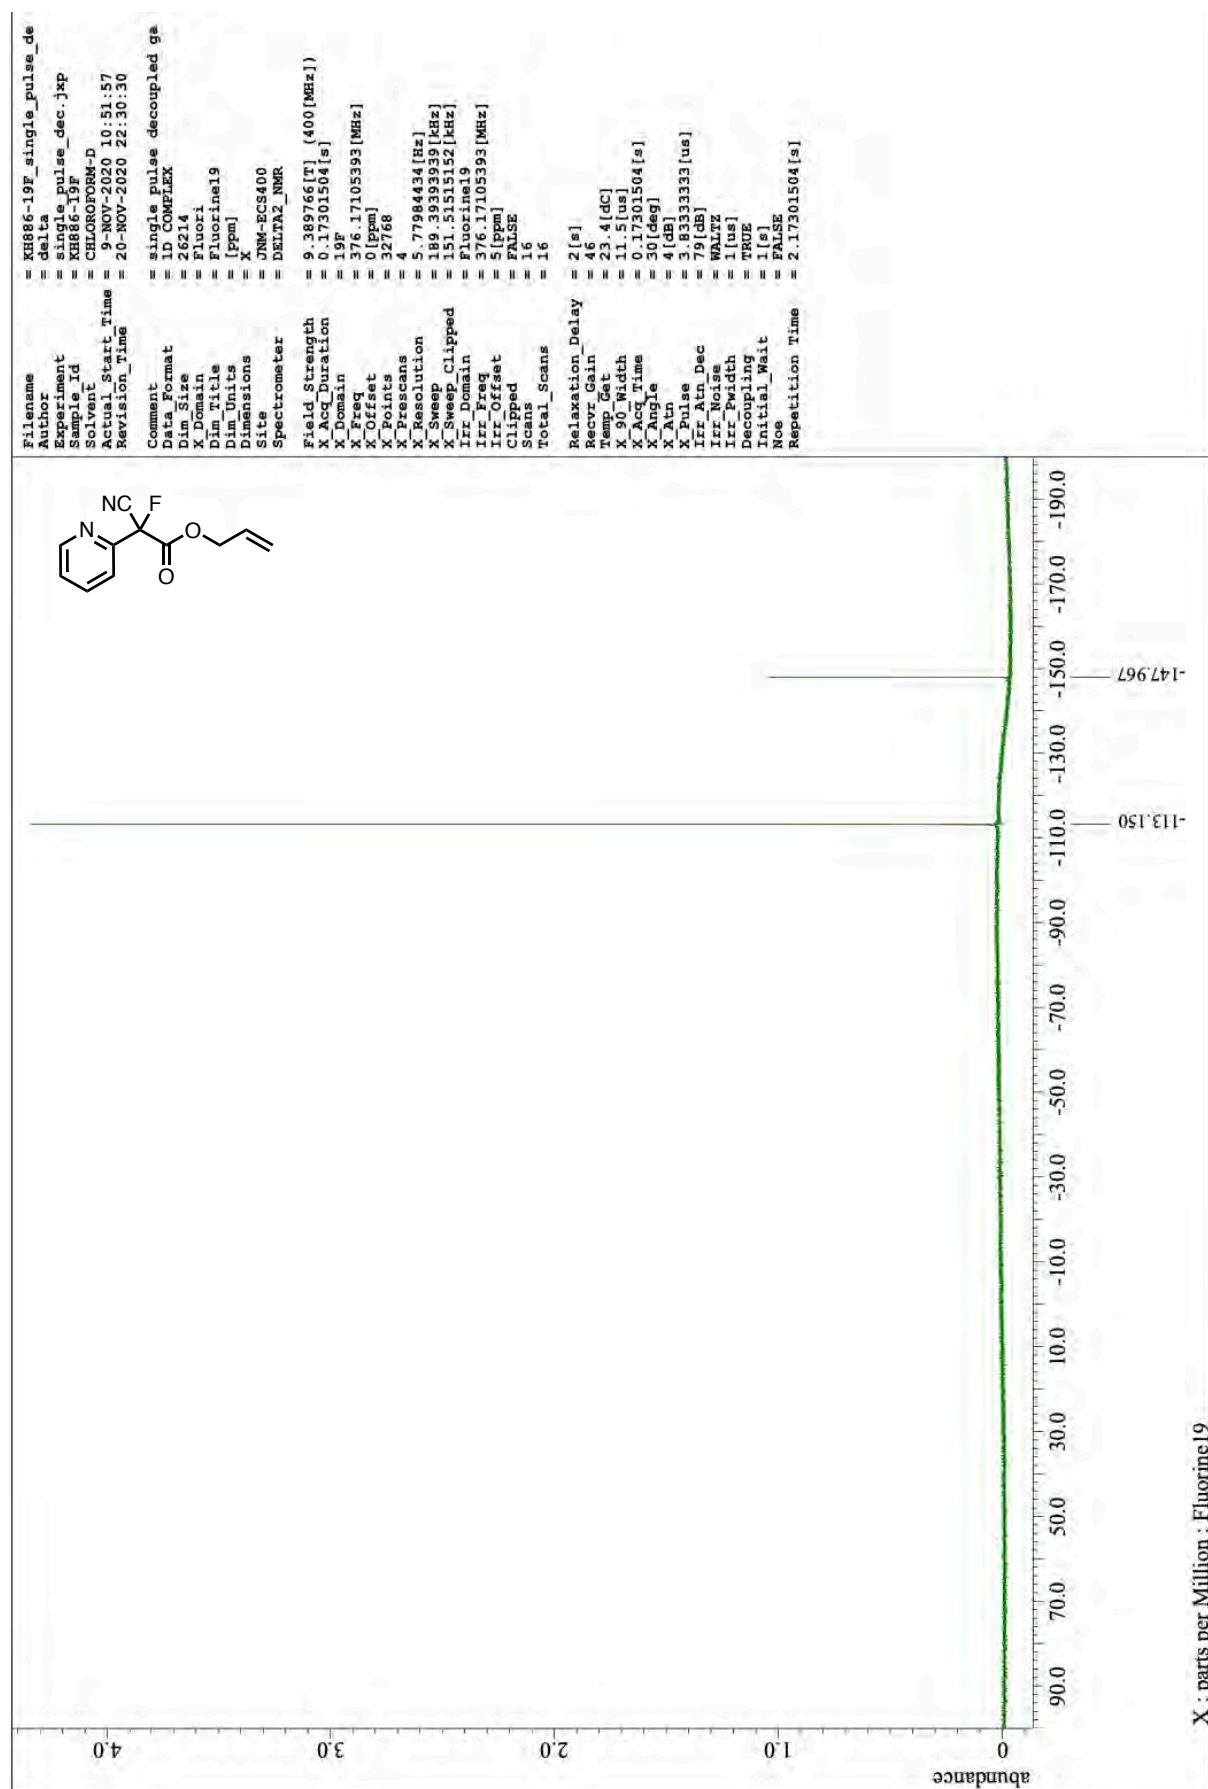



<sup>1</sup>H NMR of 2V (400 MHz, CDCl<sub>3</sub>)

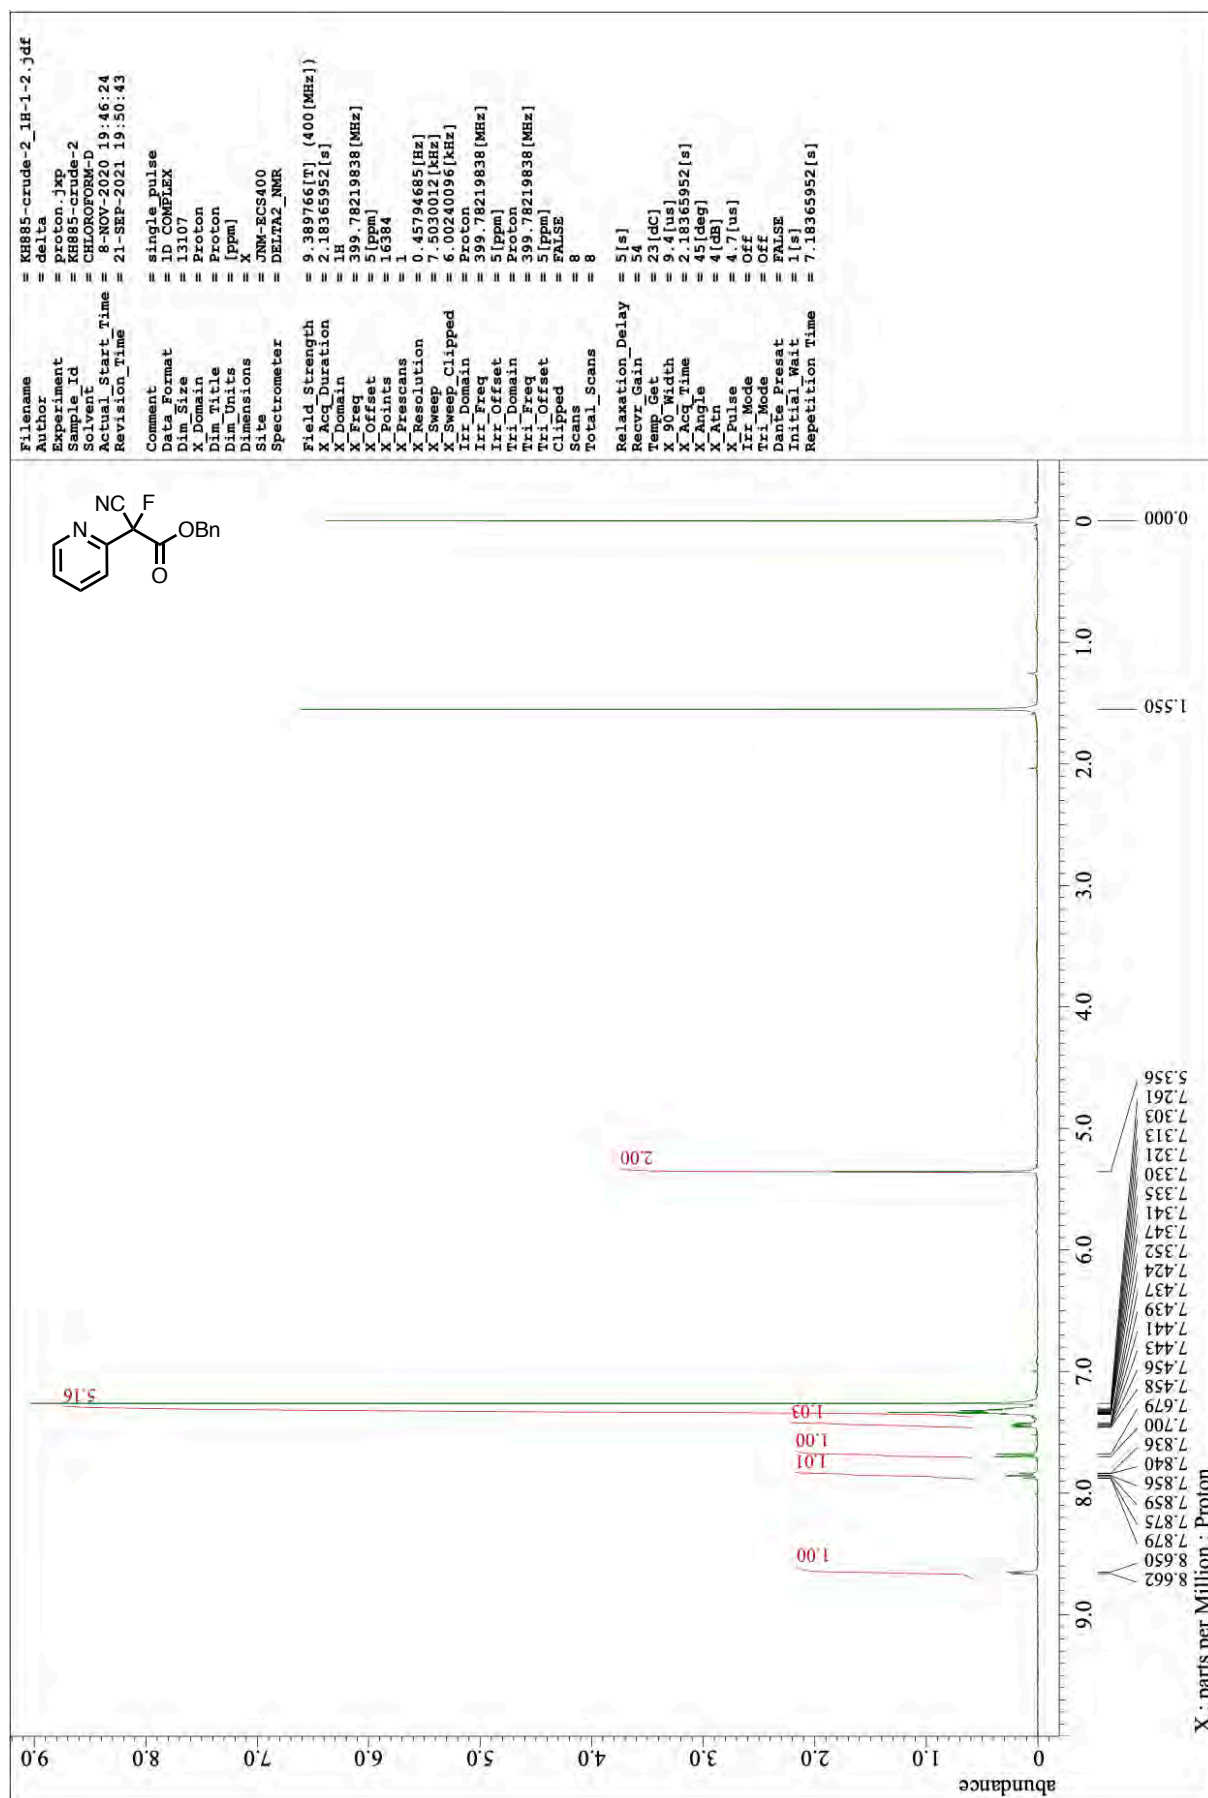

<sup>13</sup>C NMR of 2V (101 MHz, CDCl<sub>3</sub>)

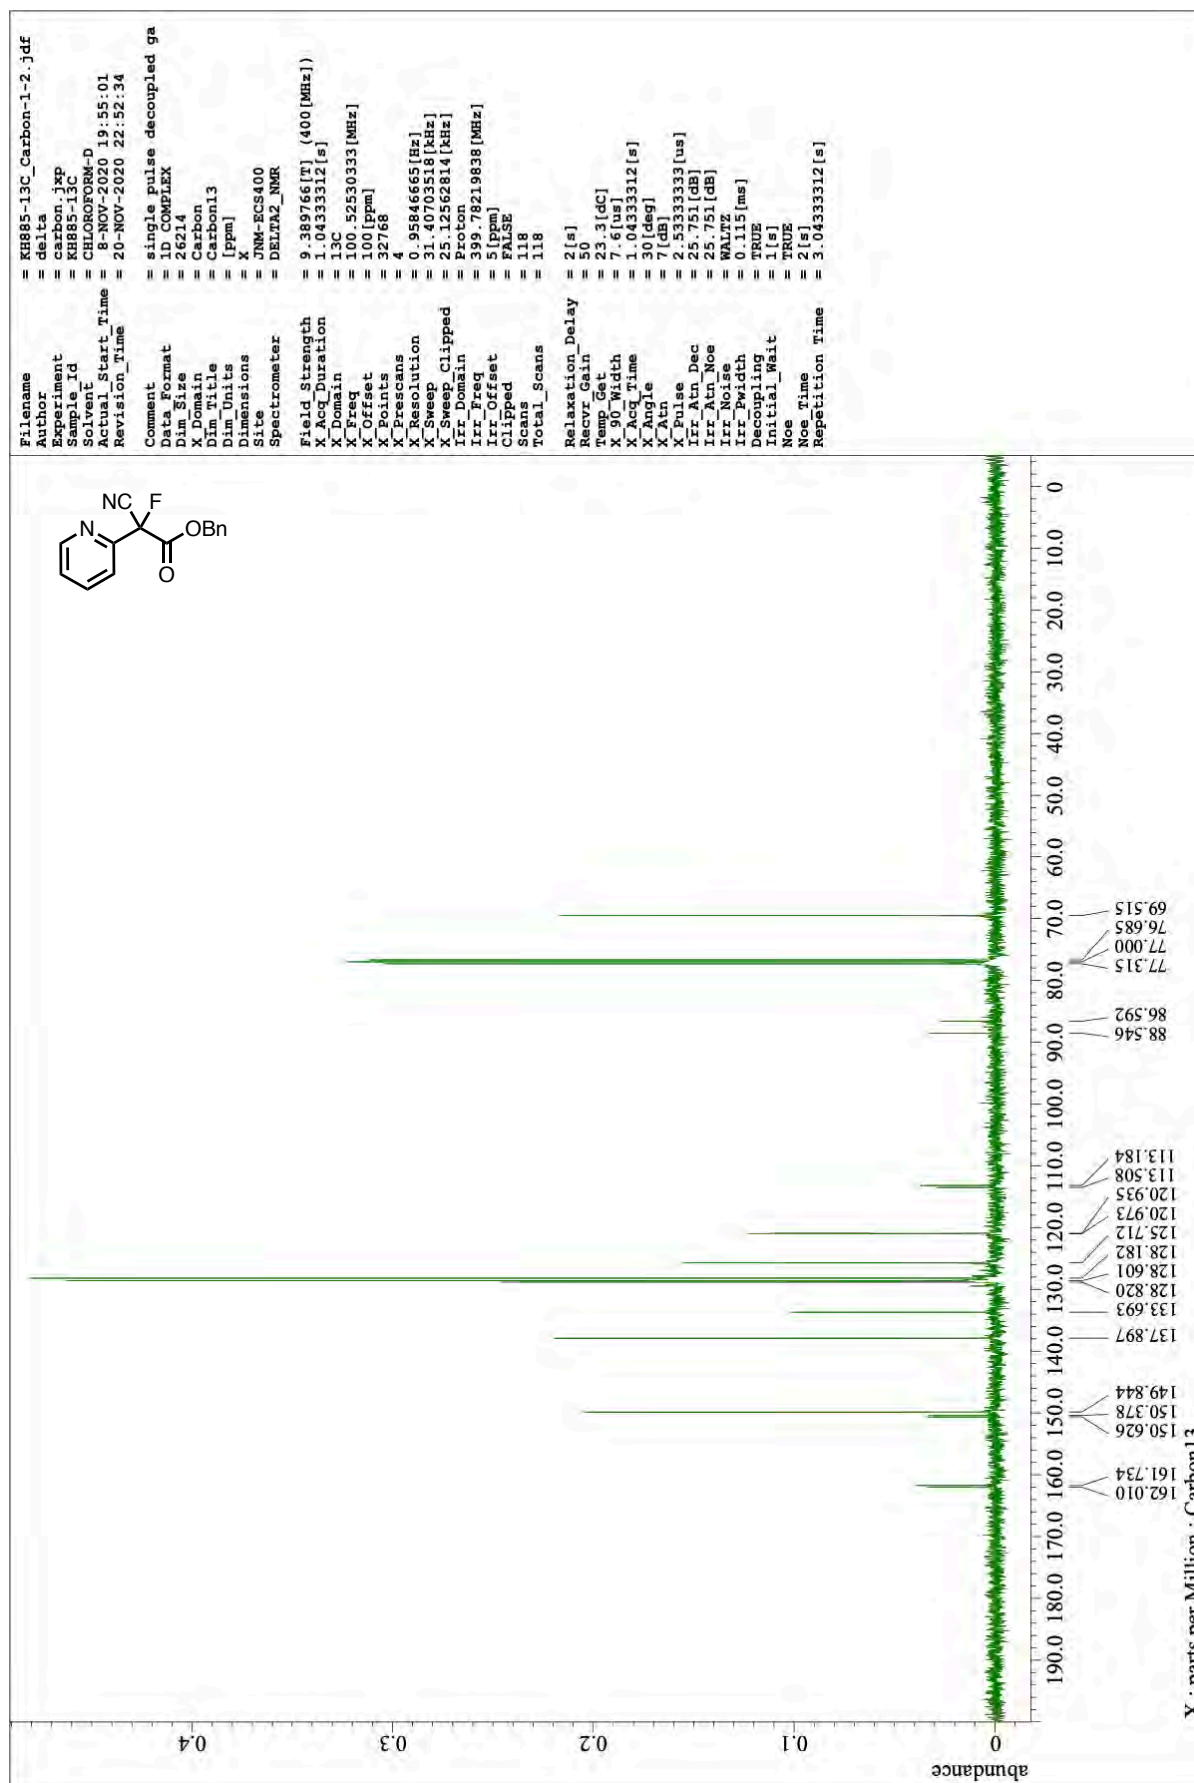

$^{19}\text{F}$  NMR of **2V** (376 MHz,  $\text{CDCl}_3$ )

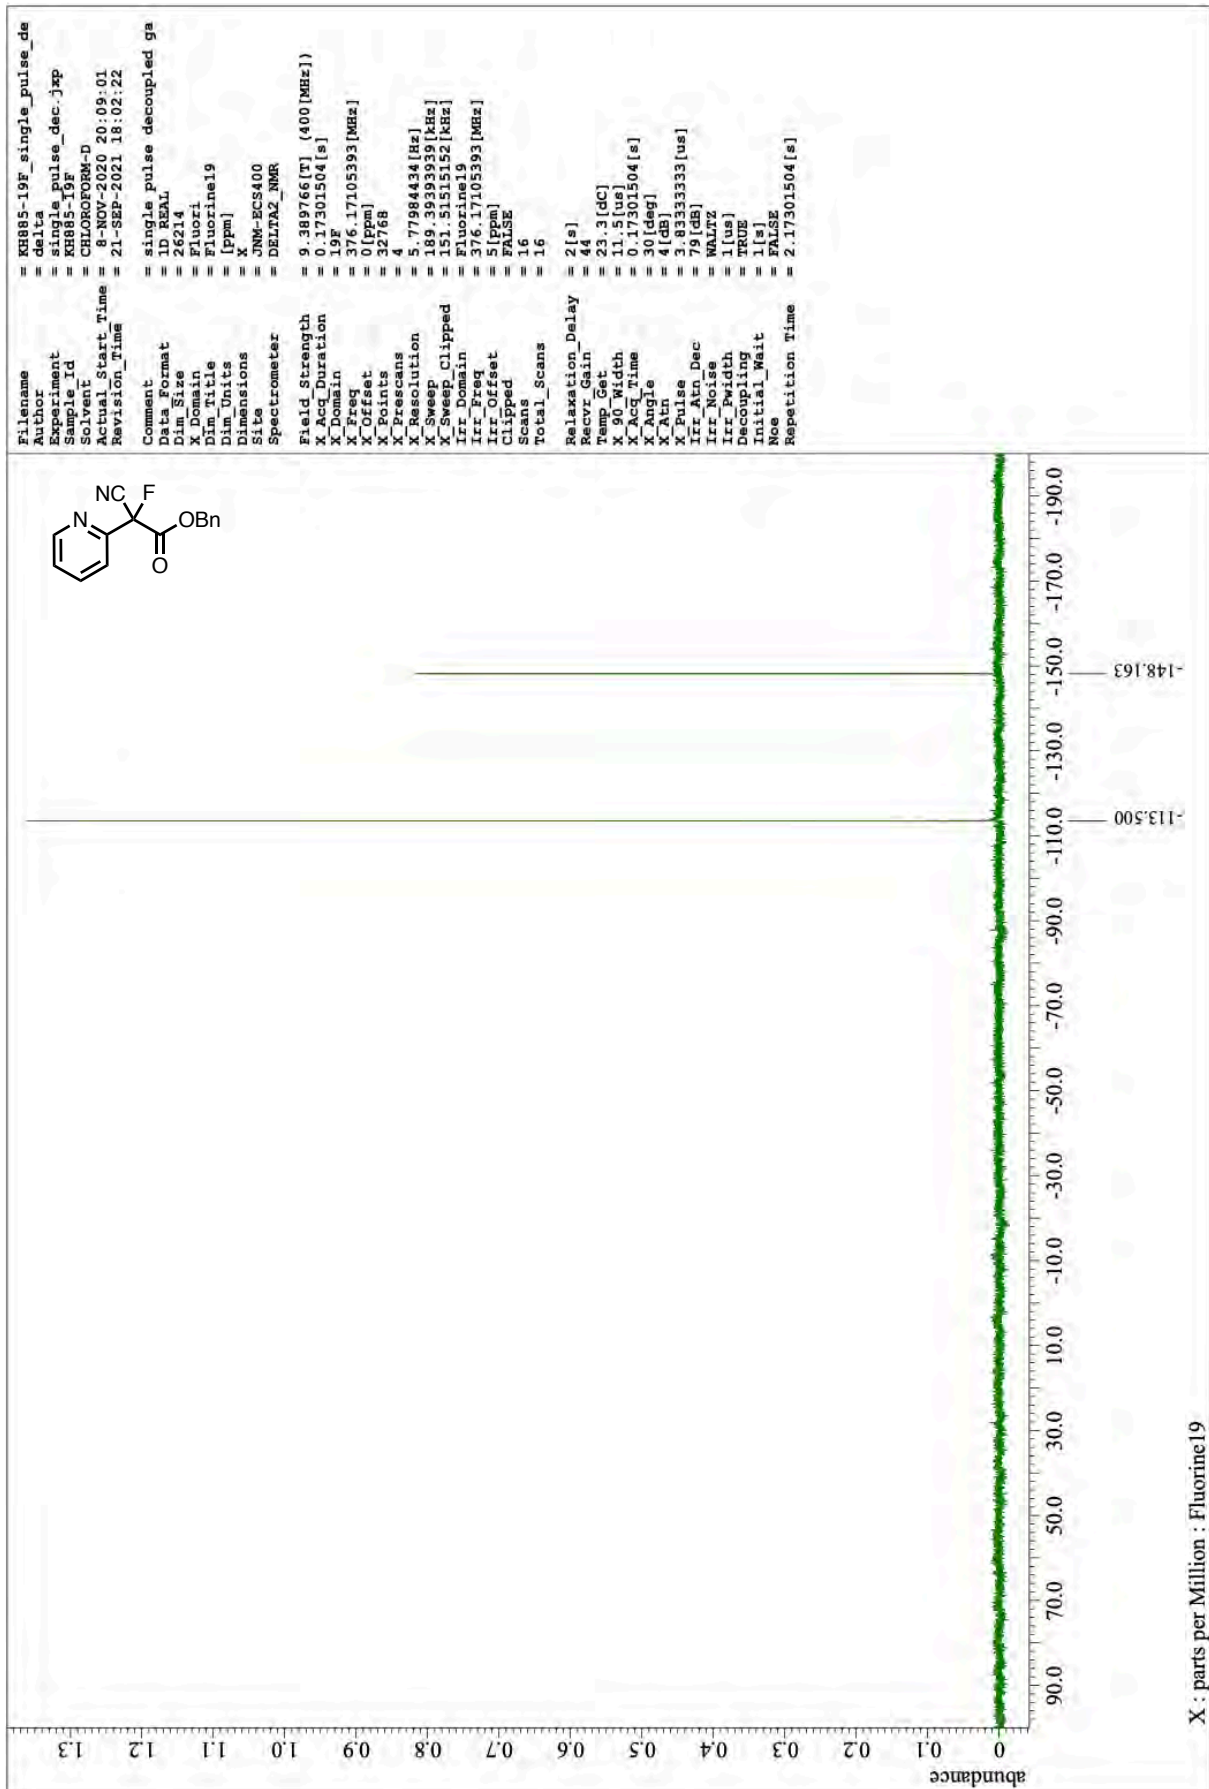

<sup>1</sup>H NMR of 2W (400 MHz, CDCl<sub>3</sub>)

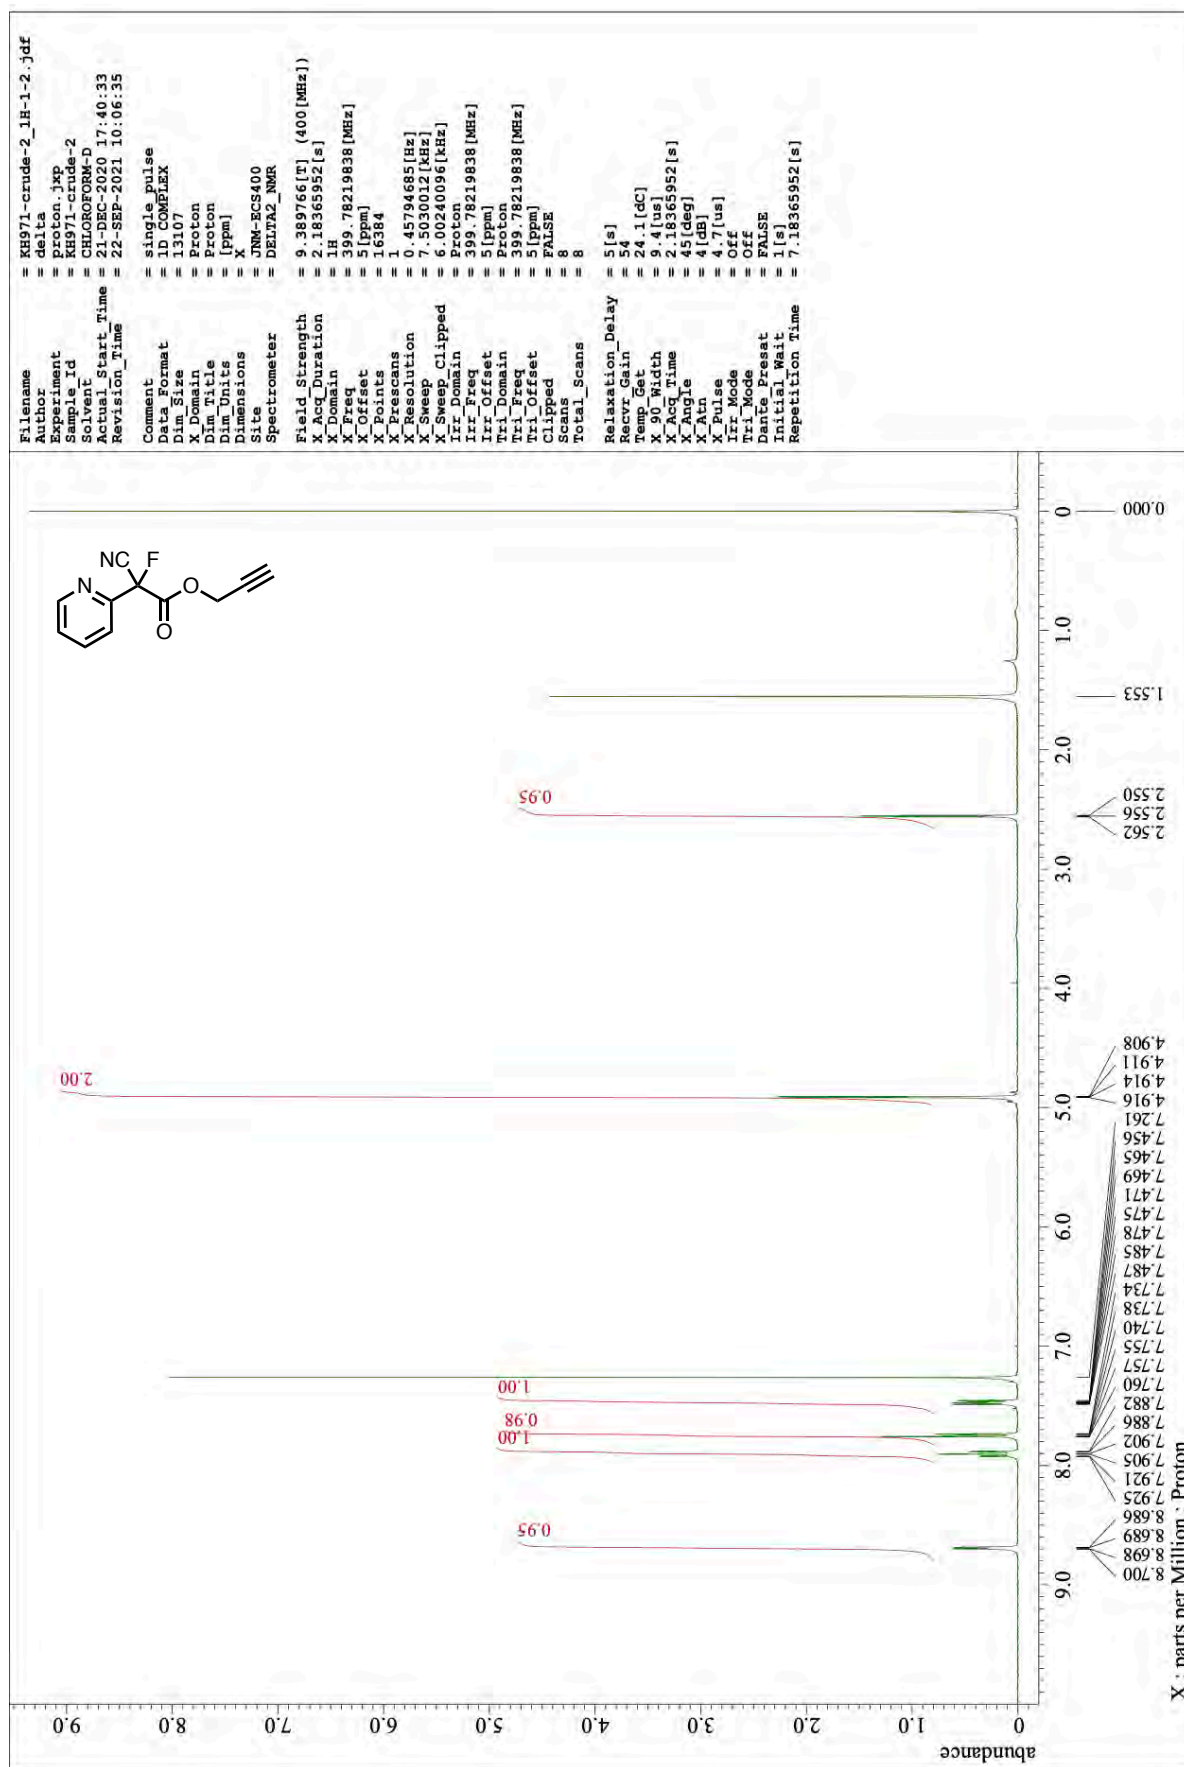

<sup>13</sup>C NMR of 2W (101 MHz, CDCl<sub>3</sub>)

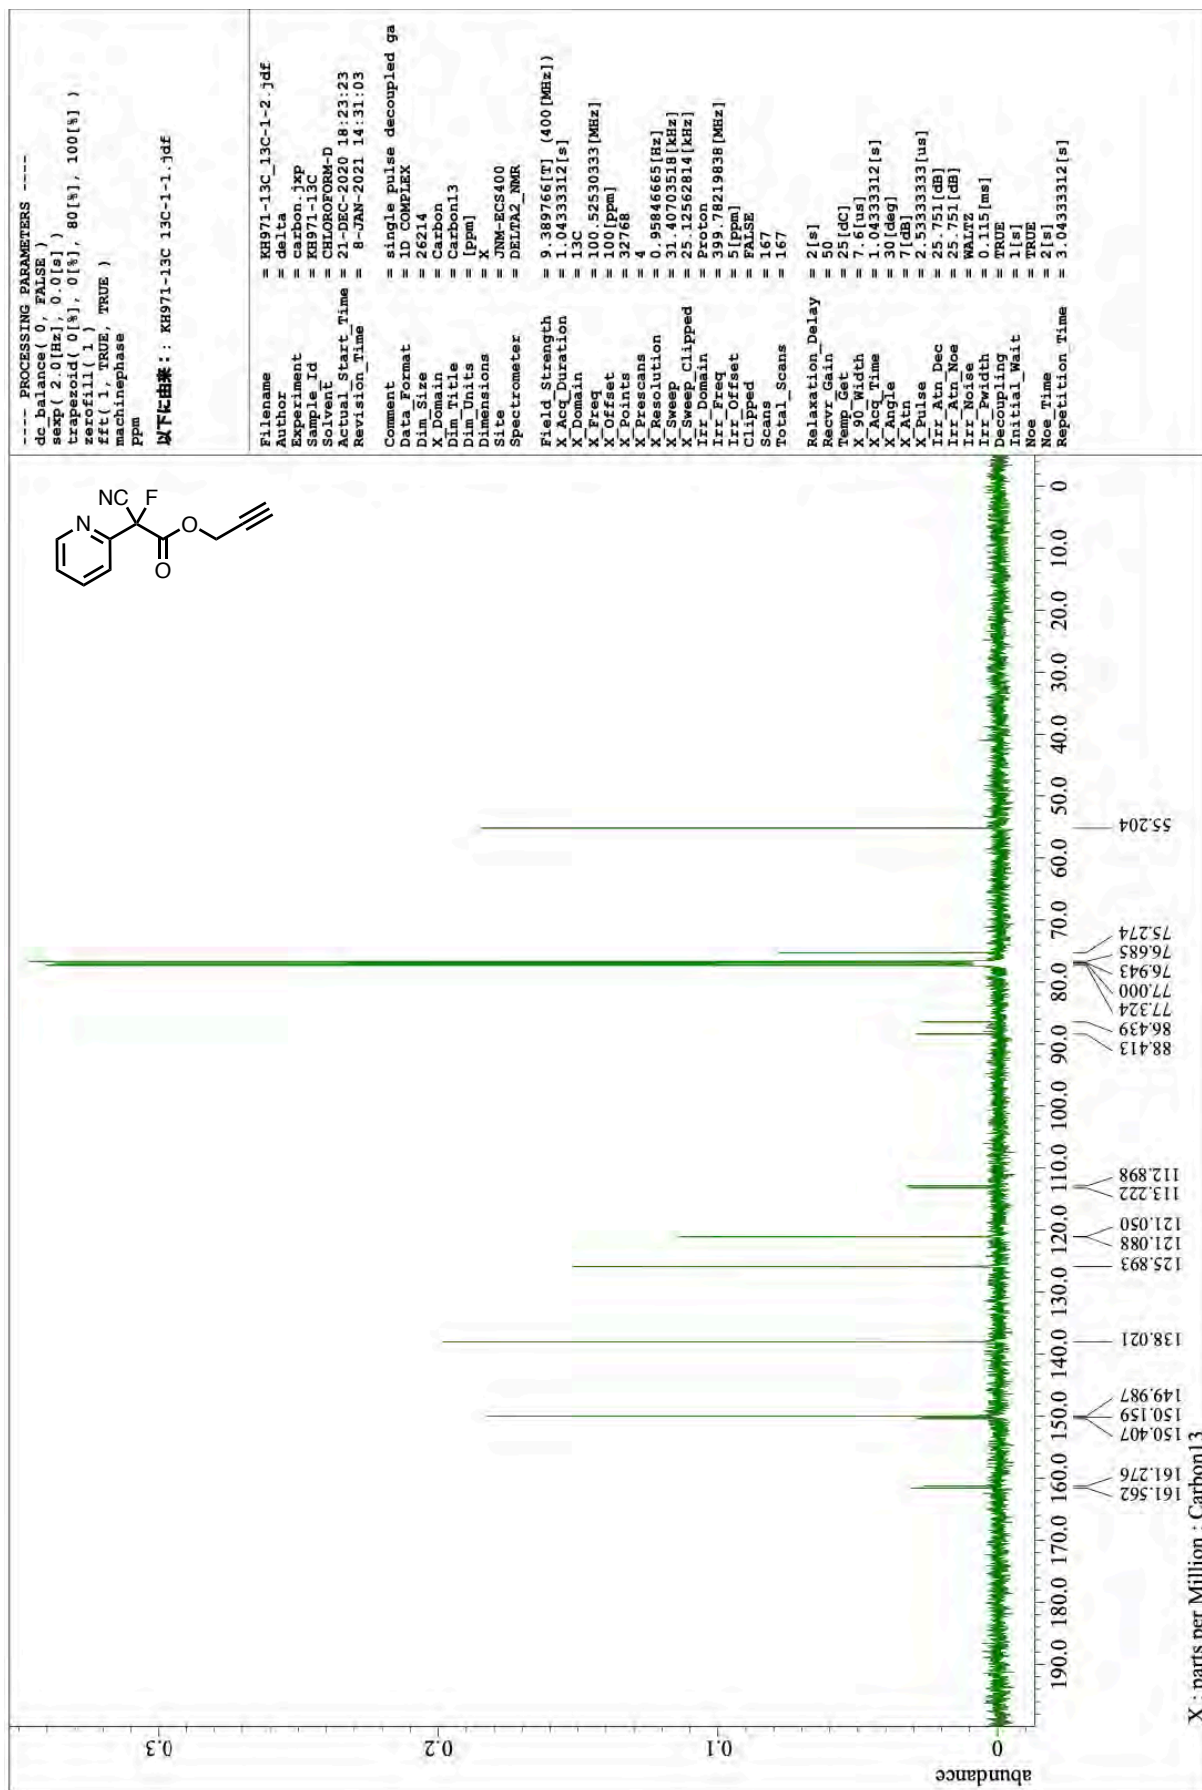

<sup>19</sup>F NMR of 2W (376 MHz, CDCl<sub>3</sub>)

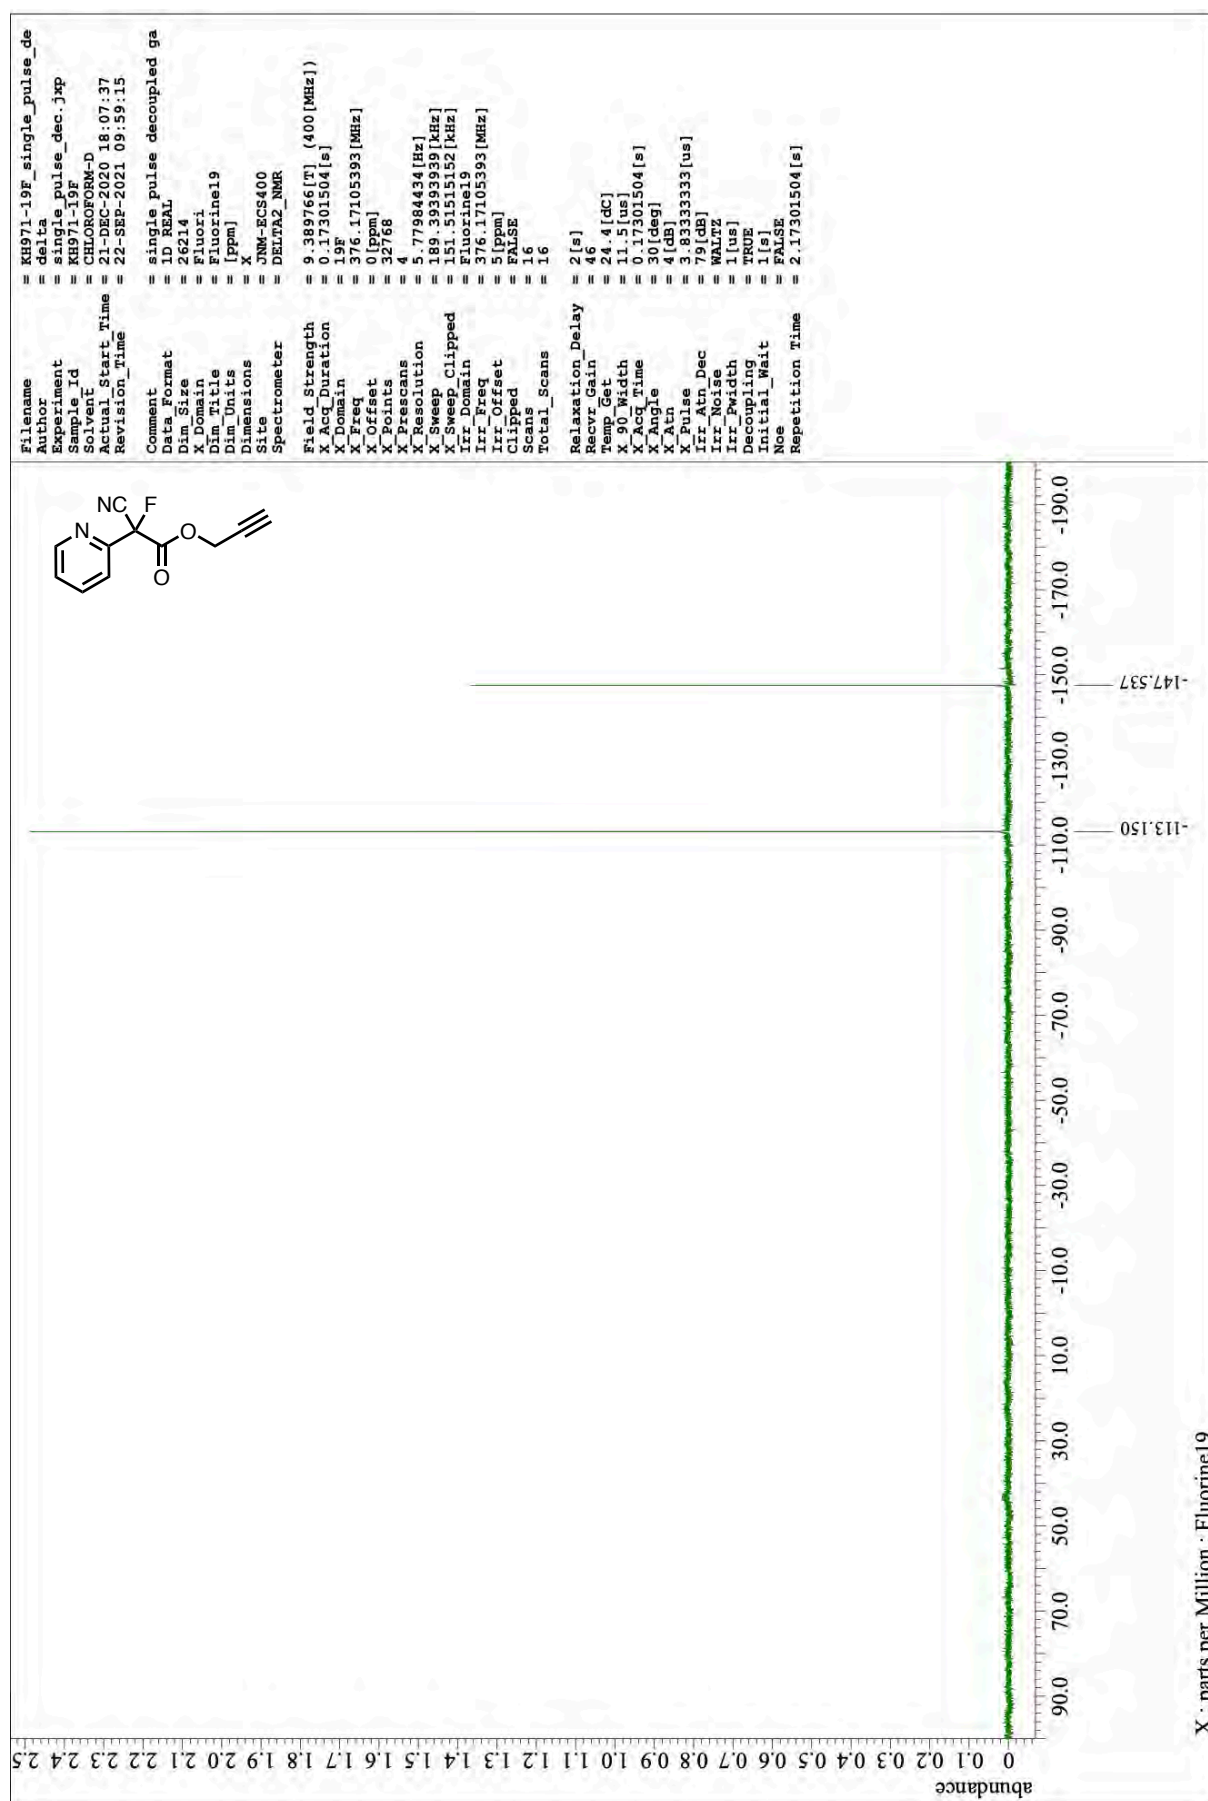

<sup>1</sup>H NMR of 2X (400 MHz, CDCl<sub>3</sub>)

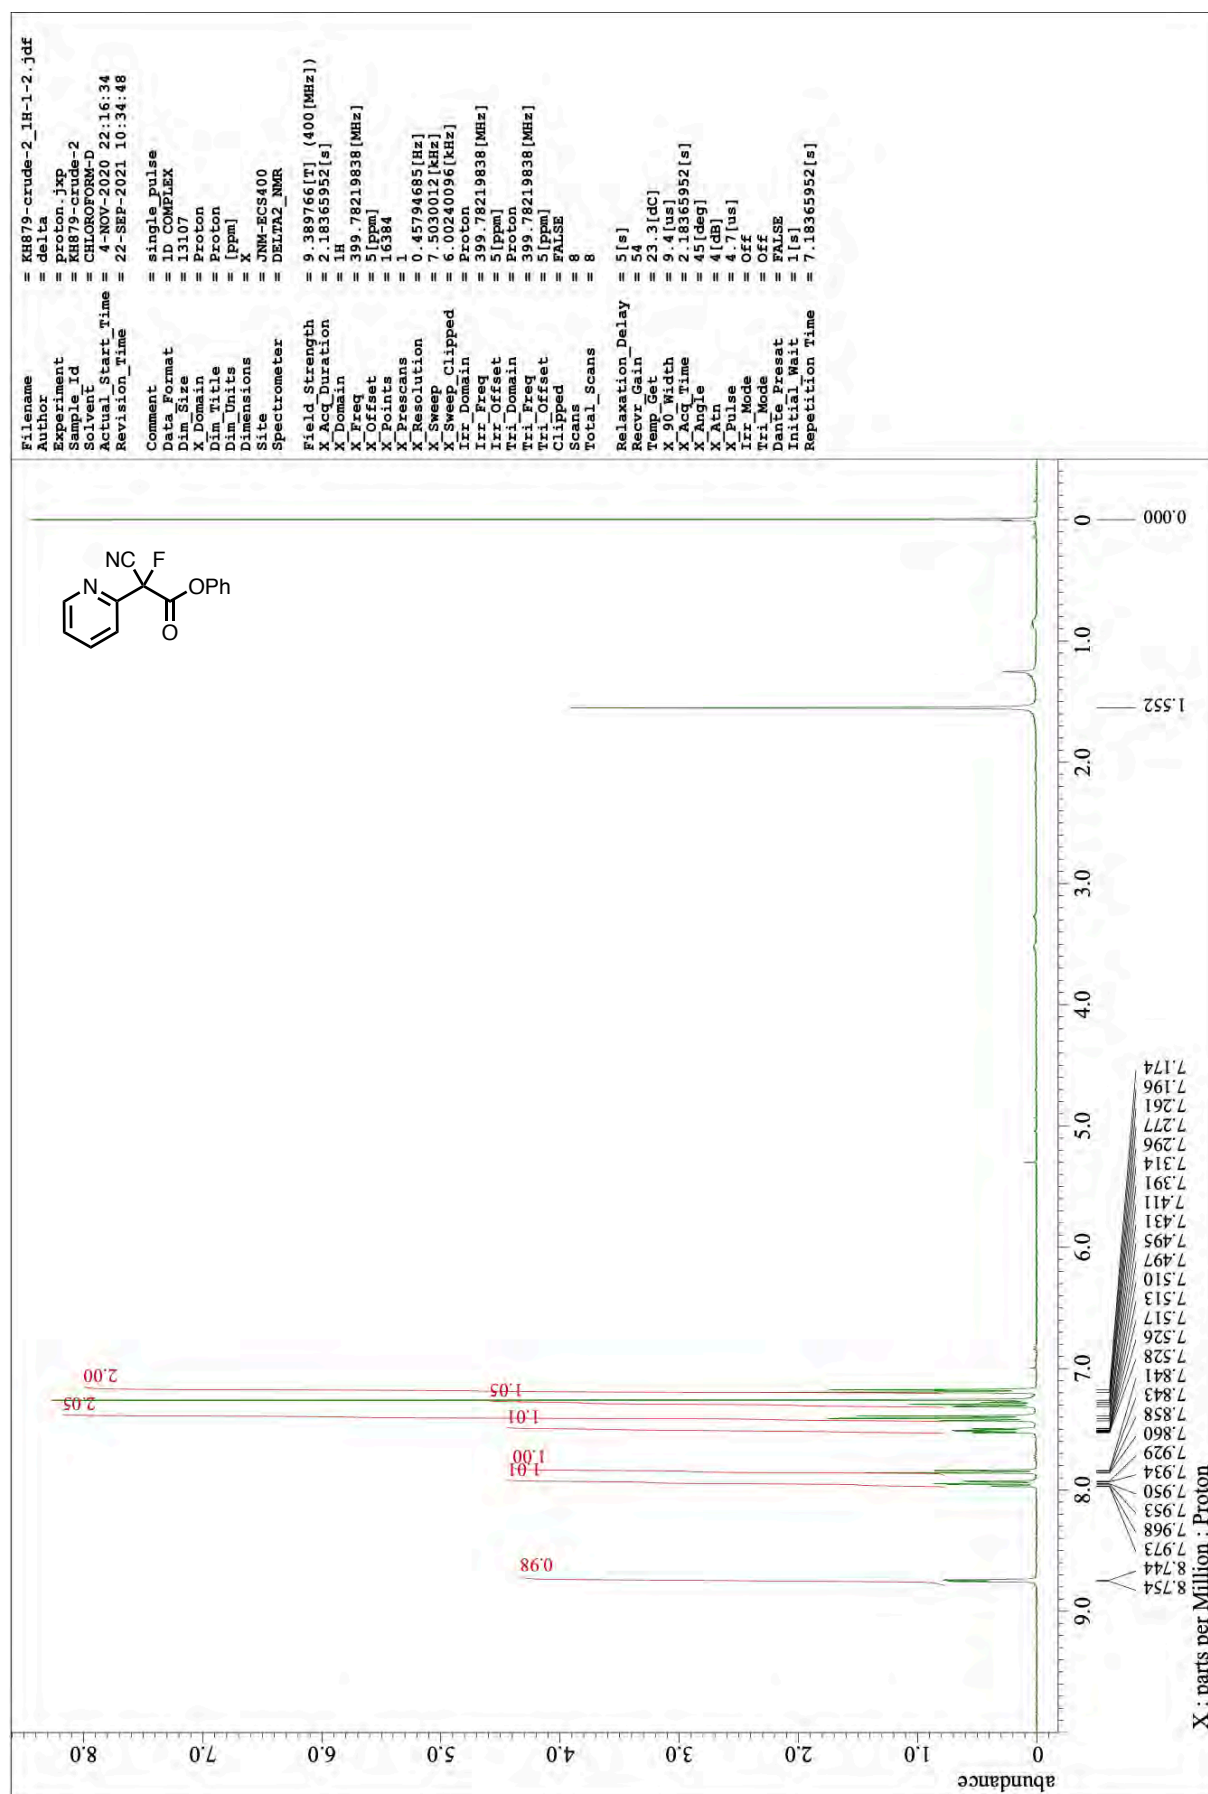

<sup>13</sup>C NMR of 2X (101 MHz, CDCl<sub>3</sub>)

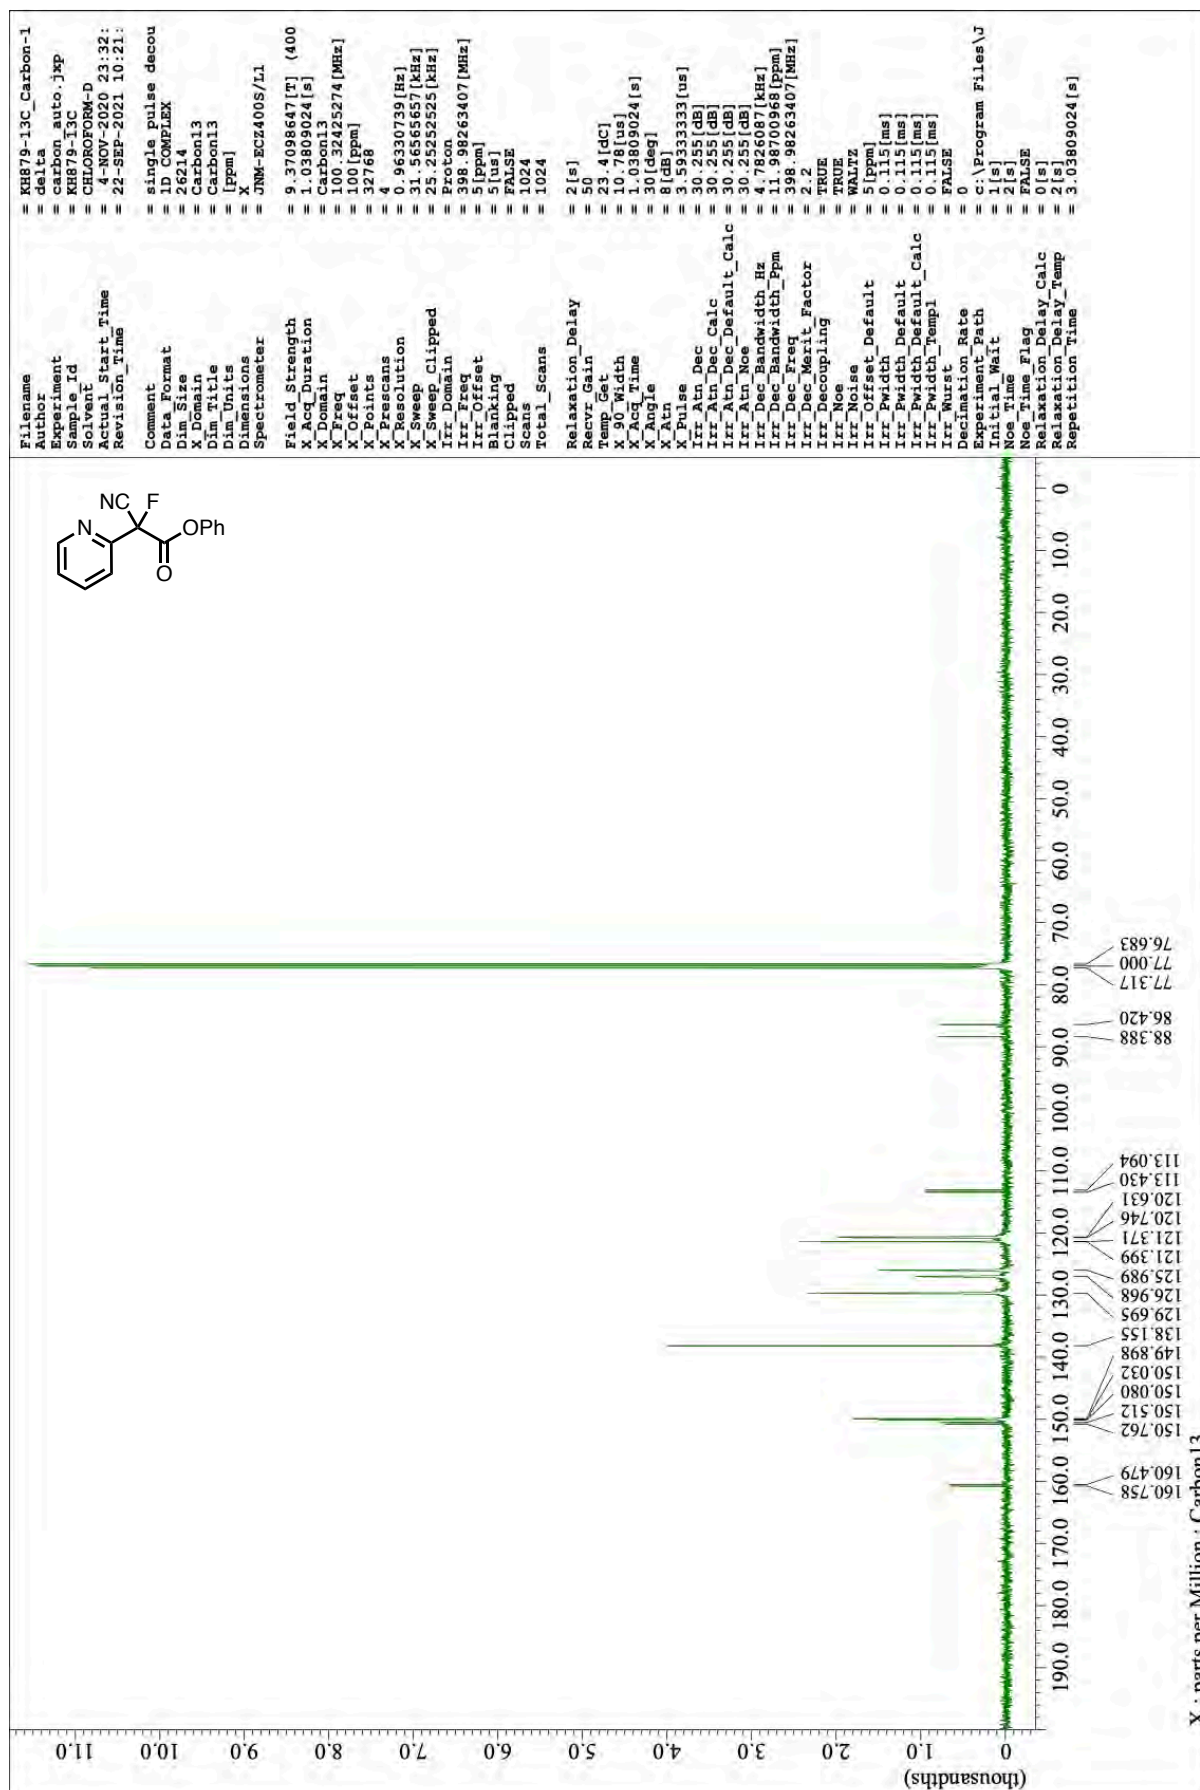



<sup>19</sup>F NMR of 2X (376 MHz, CDCl<sub>3</sub>)

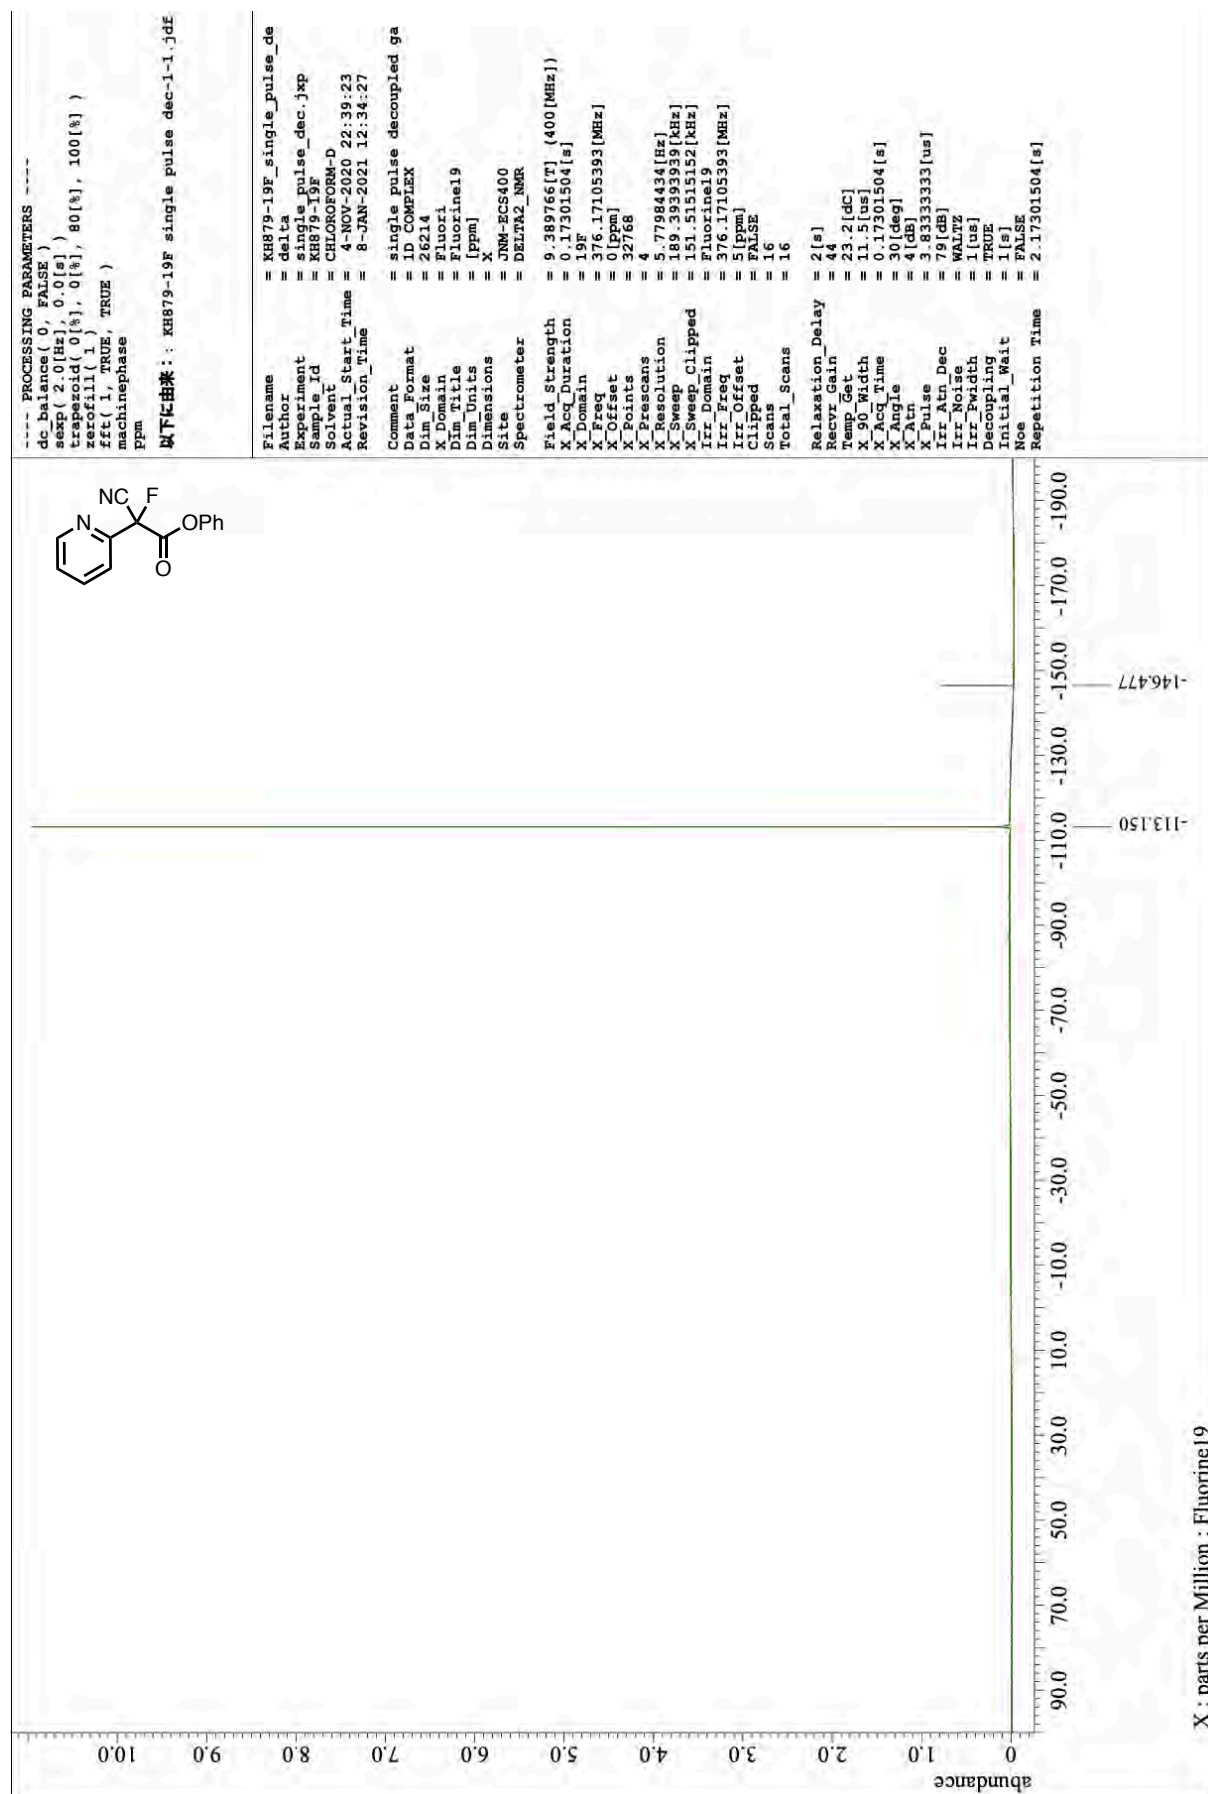

<sup>1</sup>H NMR of 2Z (400 MHz, CDCl<sub>3</sub>)

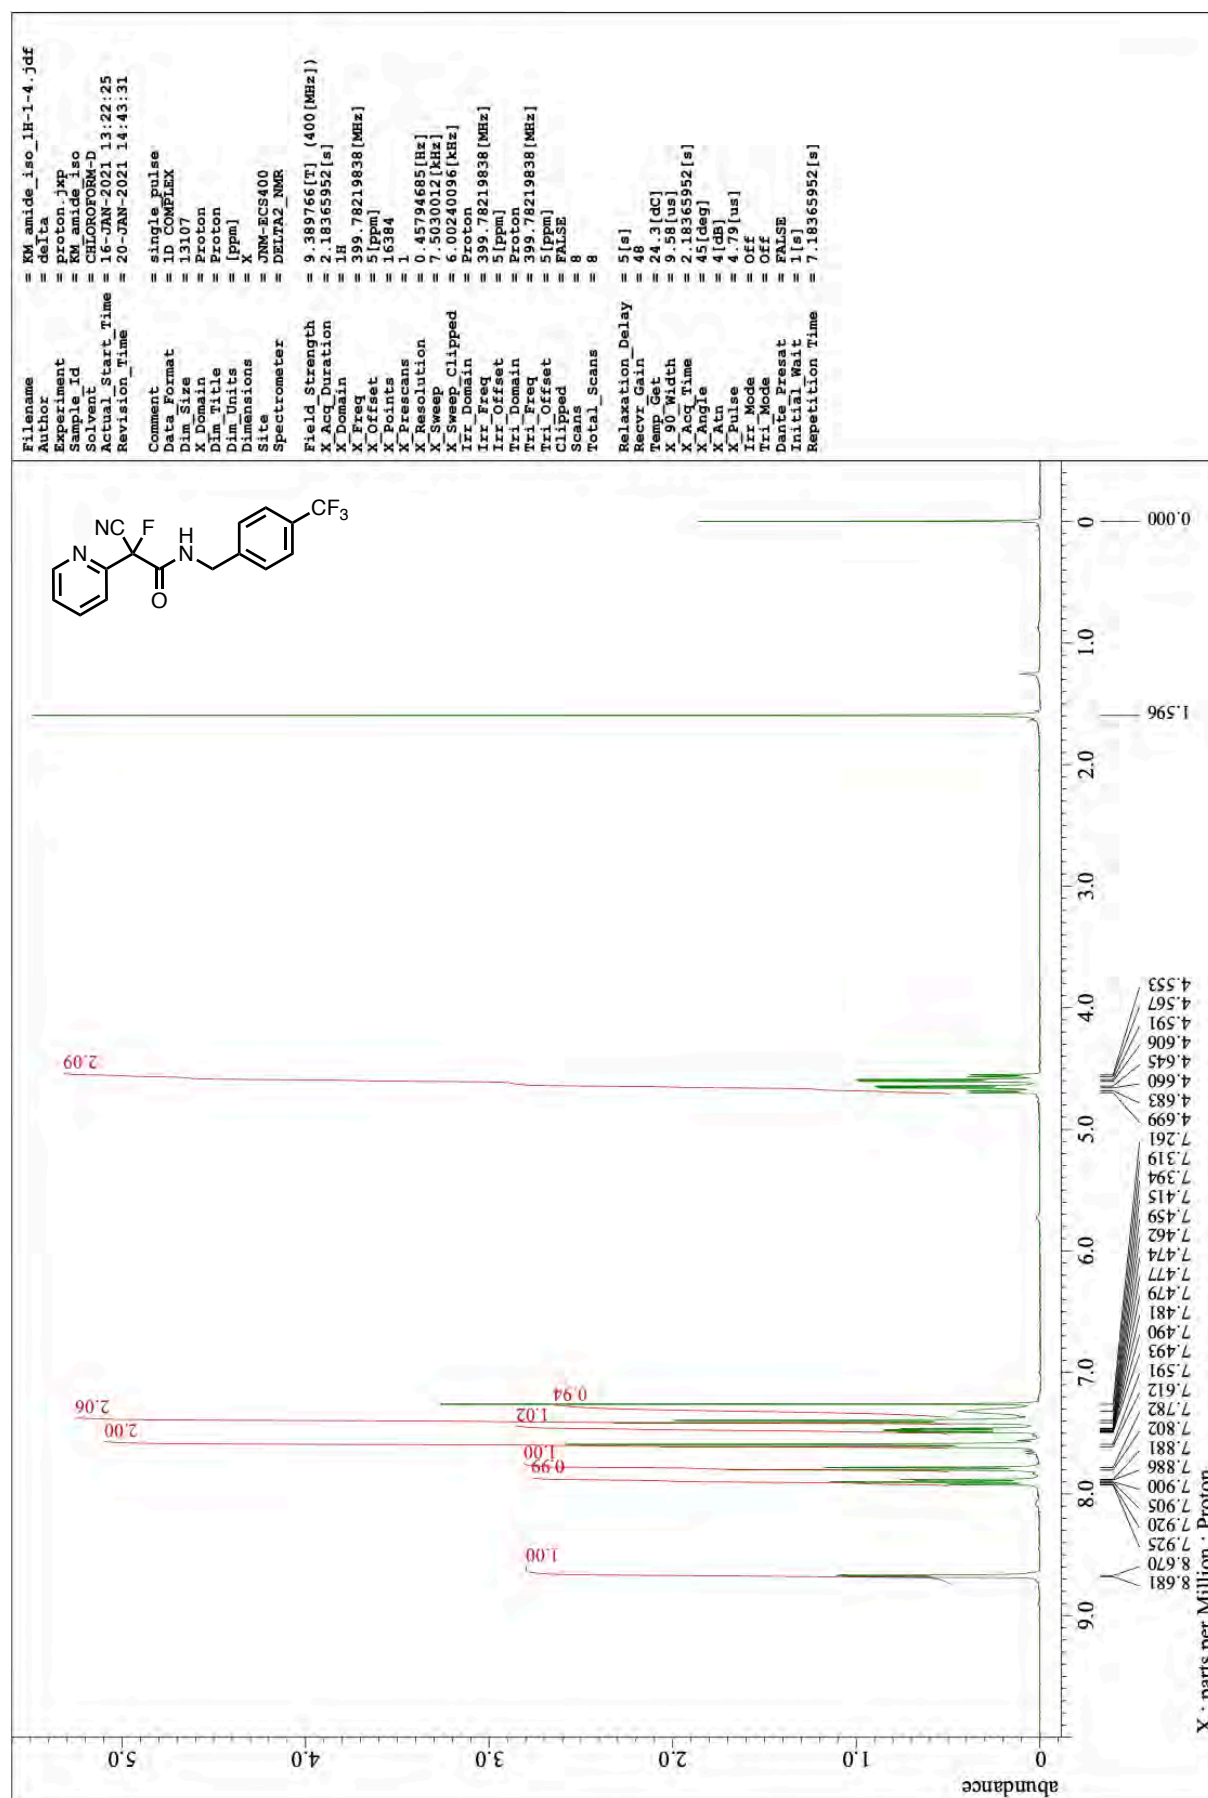

<sup>13</sup>C NMR of 2Z (101 MHz, CDCl<sub>3</sub>)

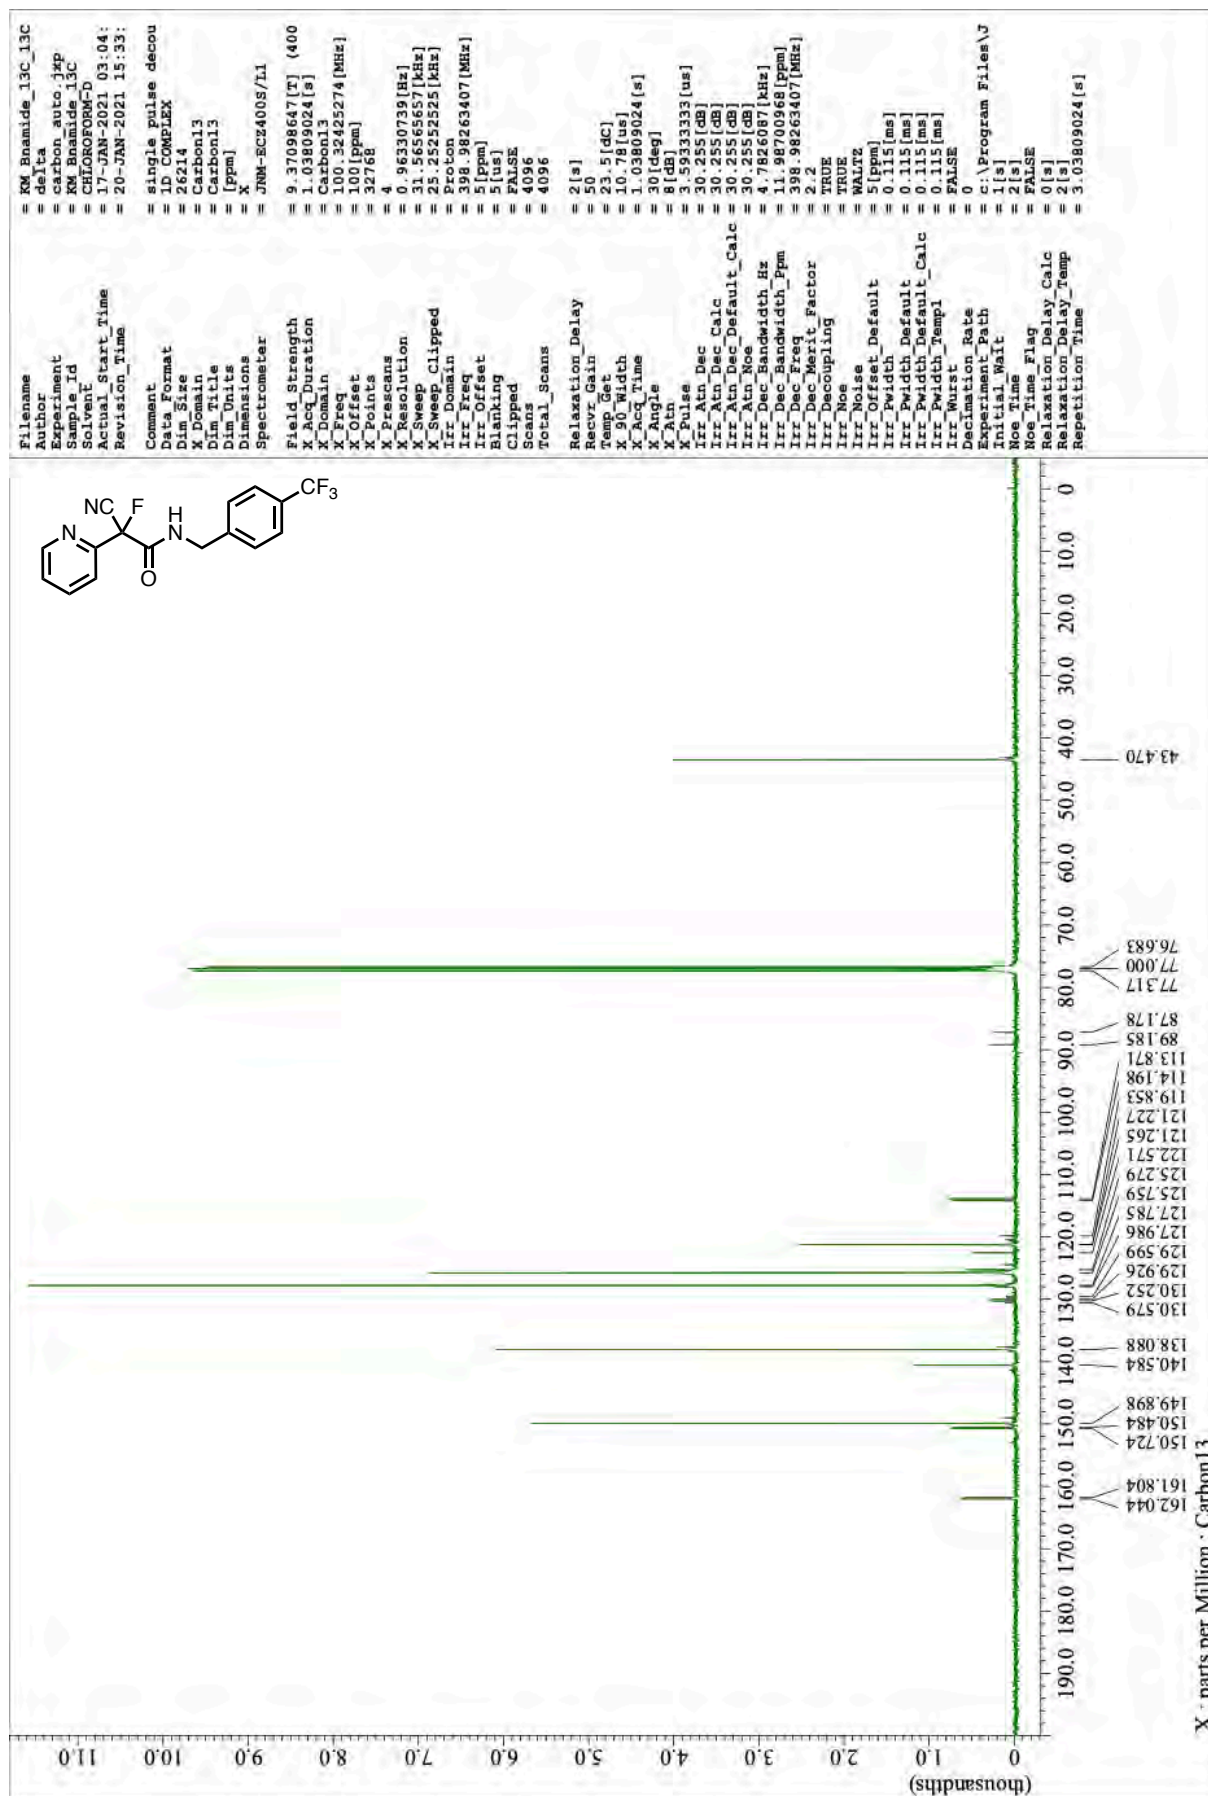

<sup>19</sup>F NMR of 2Z (376 MHz, CDCl<sub>3</sub>)

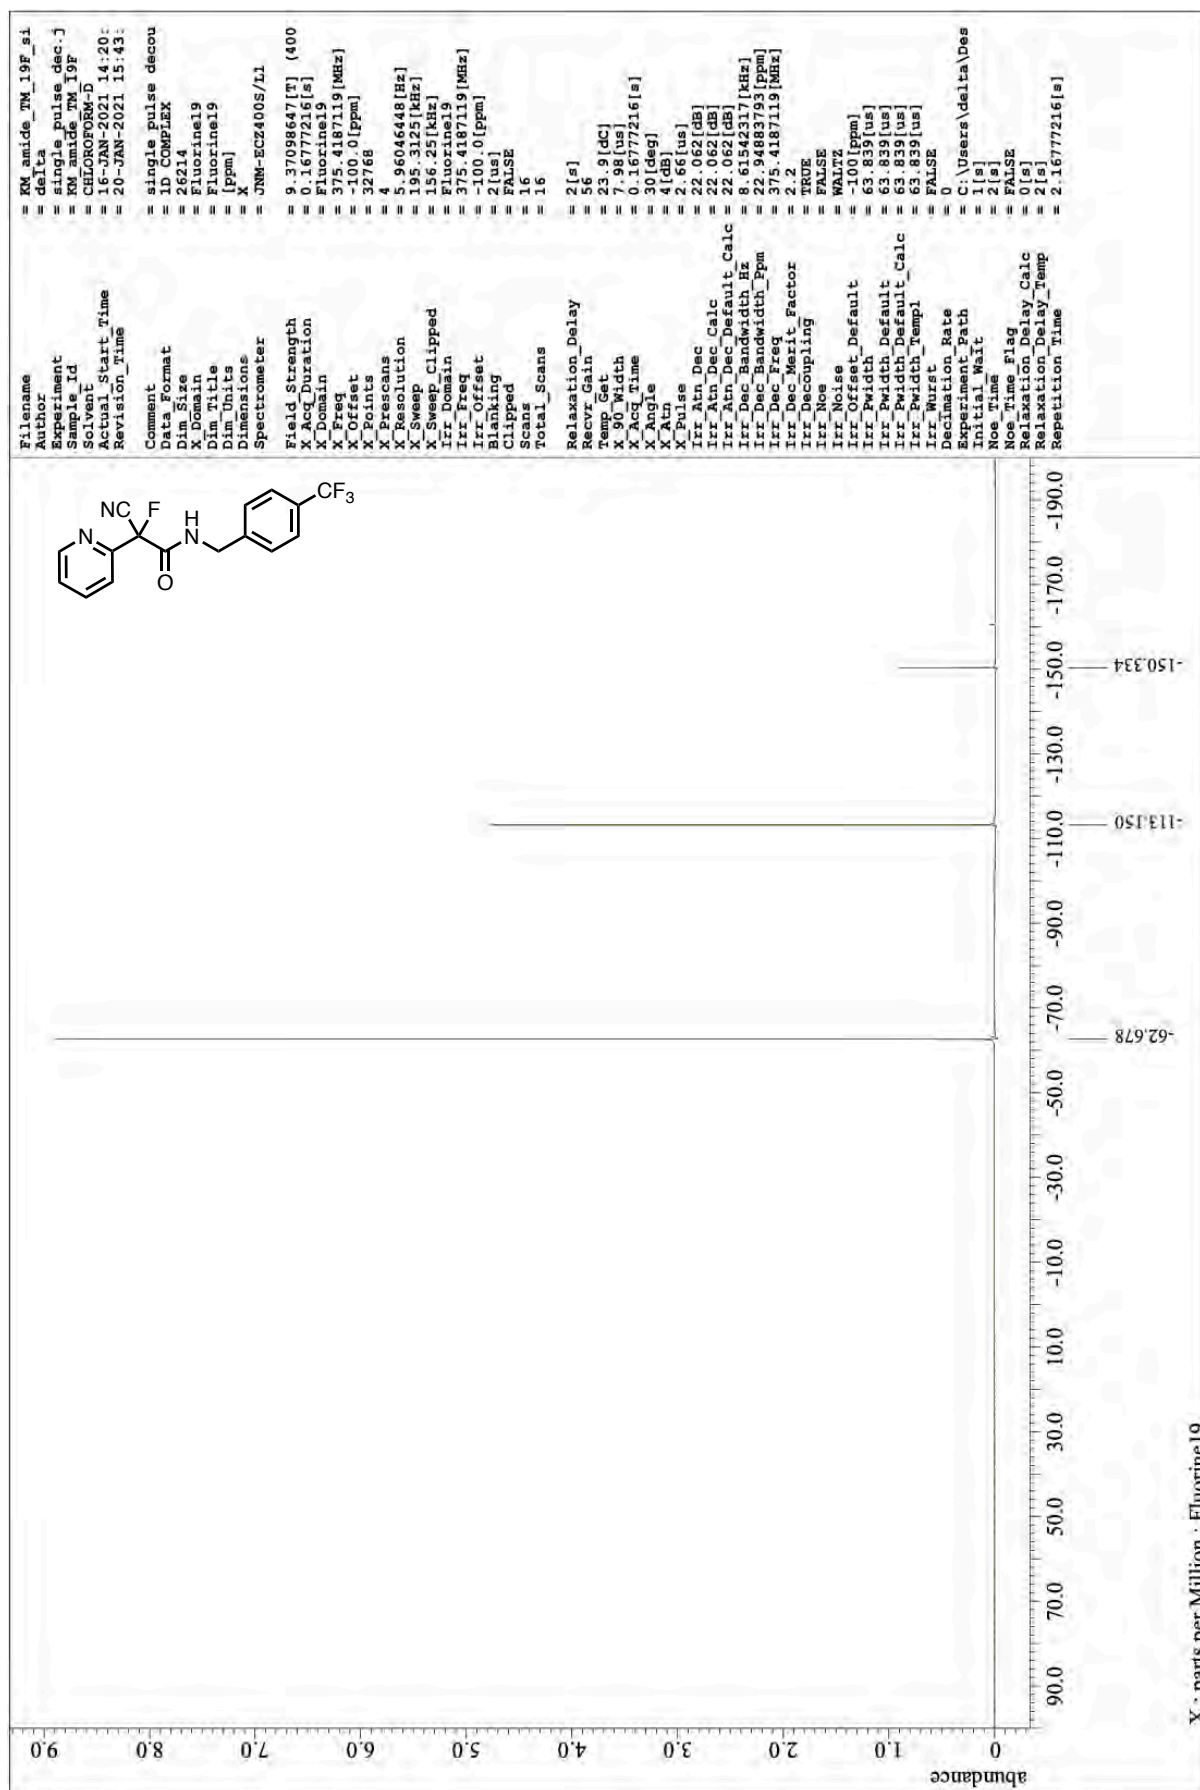

<sup>1</sup>H NMR of **2Z'** (400 MHz, CDCl<sub>3</sub>)

```

= KM2775_iso_1H_1H-1-2.
= delta_iso_1H_1H-1-2.
= proton auto_1xp
= KM2775_iso_1H
= CHLOROFORM-D
= 21-DEC-2021 00:56:09
= 21-DEC-2021 08:08:26
= single pulse
= 1D COMPLEX
= 13107
= Proton
= Proton
= [ppm]
= X
= JNM-ECZ400S/L1
= 9.37098647[T] (400[MH
= 2.18628096[s]
= Proton
= 398.98263407[MHz]
= 5[ppm]
= 16384
= 1
= 0.45739775[Hz]
= 7.4940048[kHz]
= 5.99520384[kHz]
= Proton
= 398.98263407[MHz]
= 5[ppm]
= Proton
= 398.98263407[MHz]
= 5[ppm]
= 2[us]
= FALSE
= 8
= 8
= 5[s]
= 66
= 24.5[dc]
= 6.07[us]
= 2.18628096[s]
= 45[deg]
= 5[db]
= 3.035[us]
= Off
= Off
= 500
= FALSE
= 0
= c:\Program Files\JEOL
= 1[s]
= (0, 90, 270, 180, 180
= 5[s]
= FALSE
= 0[s]
= 0[s]
= 5[s]
= 7.18628096[s]

```

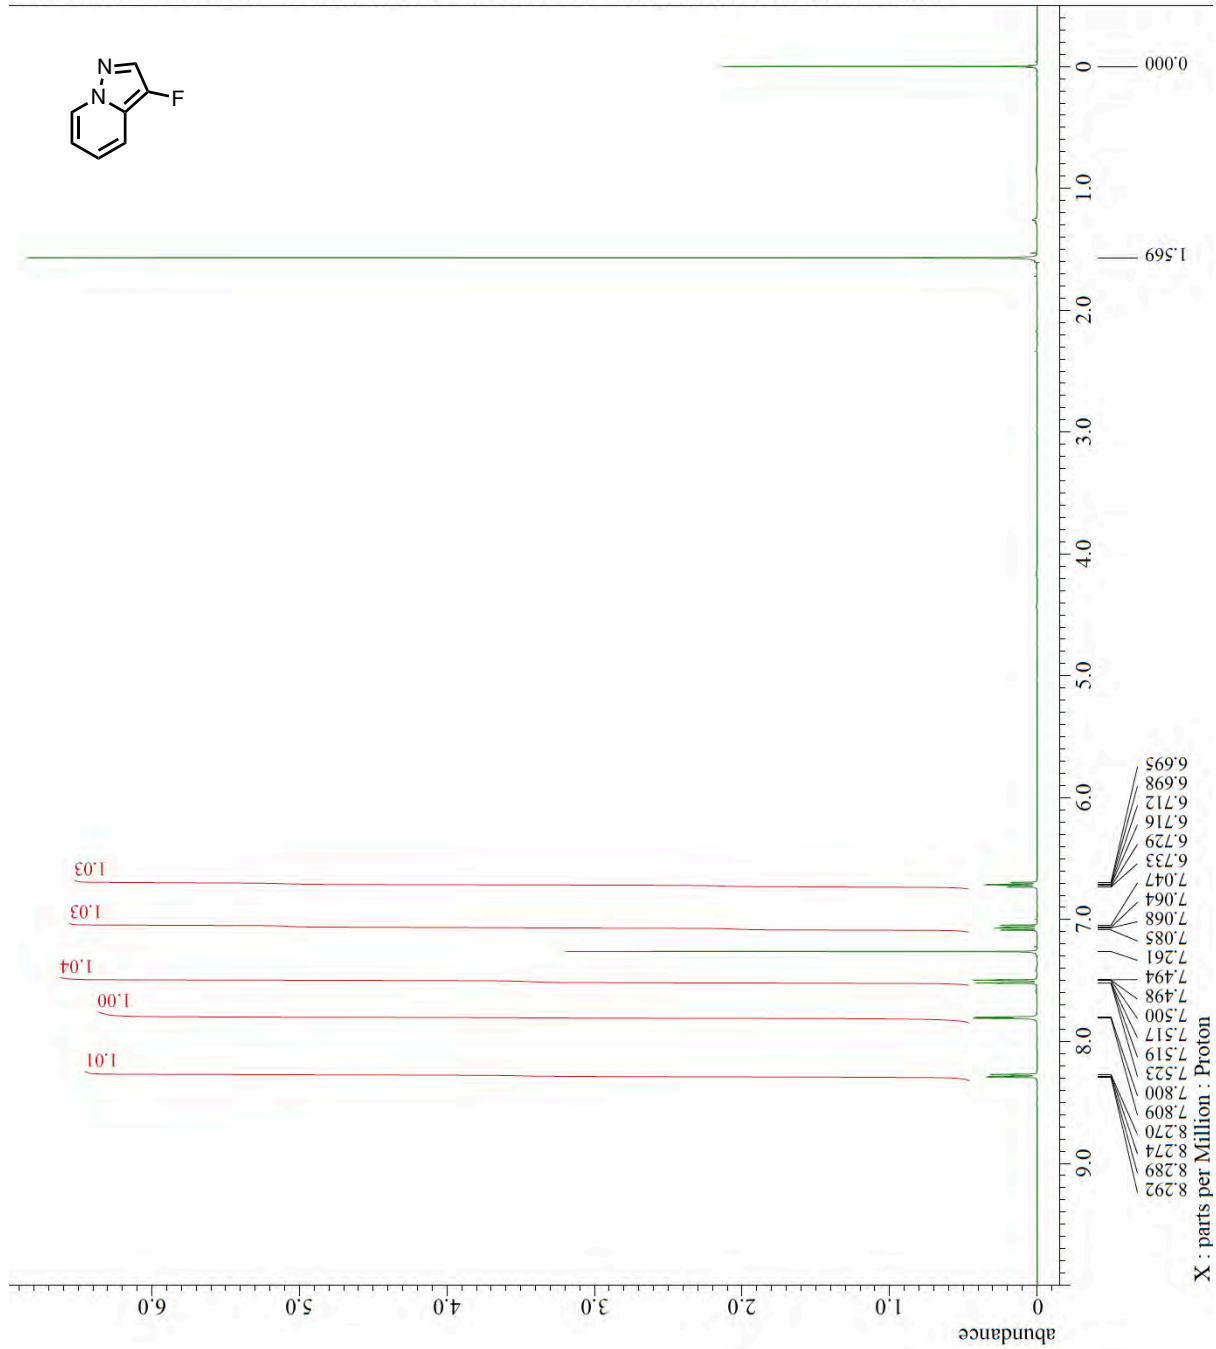

<sup>13</sup>C NMR of 2Z' (101 MHz, CDCl<sub>3</sub>)

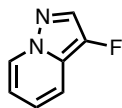

```

Filename = KM2725_iso_13C-2-2
Author = delta
Experiment = carbon_auto.jpg
Sample Id = KM2725_iso
Solvent = CHLOROFORM-D
Actual Start Time = 20-DEC-2021 23:48:
Revision Time = 21-DEC-2021 07:45:
Comment = single pulse decou
ID COMPLEX = 26214
Carbon13 = Carbon13
Dim Title = [ppm]
Dimensions = X
Spectrometer = JNM-ECZ400S/L1
Field Strength = 9.37098647 [T] (400
X Acq_Duration = 1.03809024 [s]
X Domain = Carbon13
X Freq = 100.32425274 [MHz]
X Offset = 32768
X Points = 4
X Prescans = 0.96330739 [Hz]
X Resolution = 31.56565657 [kHz]
X Sweep = 25.25252525 [kHz]
X Sweep Clipped = Proton
Irr Domain = 398.98263407 [MHz]
Irr Freq = 5 [ppm]
Irr Offset = 5 [us]
Blanking = TRUE
Clipped = 1112
Scans = 1112
Total_Scans = 1112
Relaxation_Delay = 2 [s]
Recvr Gain = 50
Temp_Get = 24.5 [dC]
X 90_Width = 10.42 [us]
X Acq Time = 1.03809024 [s]
X Angle = 30 [deg]
X Atn = 8 [dB]
X Atn Pulse = 3.47333333 [us]
Irr Atn Dec = 30.255 [dB]
Irr Atn Dec Calc = 30.255 [dB]
Irr Atn Dec Default_Calc = 30.255 [dB]
Irr Atn Noe = 30.255 [dB]
Irr Dec Bandwidth_Hz = 4.7826087 [kHz]
Irr Dec Bandwidth_Ppm = 11.98700968 [ppm]
Irr Dec Freq = 398.98263407 [MHz]
Irr Dec Merit Factor = 2.2
Irr Decoupling = TRUE
Irr Noe = TRUE
Irr Noise = WALTZ
Irr Offset_Default = 5 [ppm]
Irr Pwidth = 0.115 [ms]
Irr Pwidth_Default = 0.115 [ms]
Irr Pwidth_Default_Calc = 0.115 [ms]
Irr Pwidth_Templ = 0.115 [ms]
Irr Wurst = FALSE
Decimation Rate = 0
Experiment Path = c:\Program Files\J
Initial Wait = 1 [s]
Noe Time = 2 [s]
Noe Time Flag = FALSE
Relaxation_Delay_Calc = 0 [s]
Relaxation_Delay_Temp = 2 [s]
Repetition Time = 3.03809024 [s]
    
```

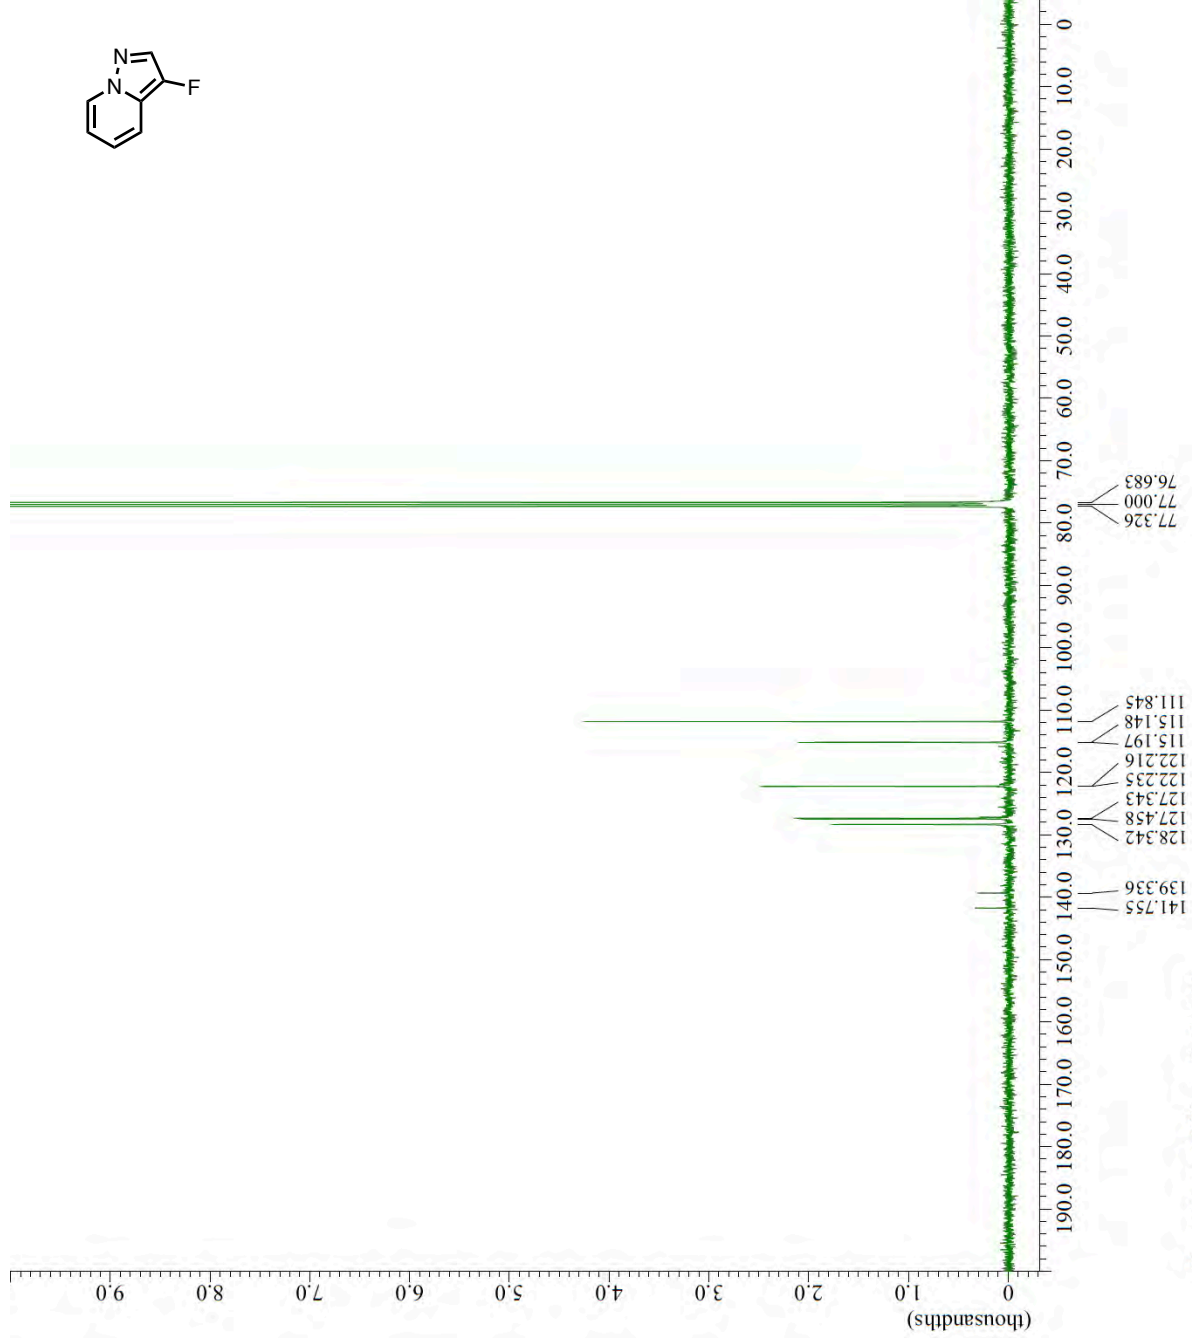

<sup>19</sup>F NMR of **2Z'** (376 MHz, CDCl<sub>3</sub>)

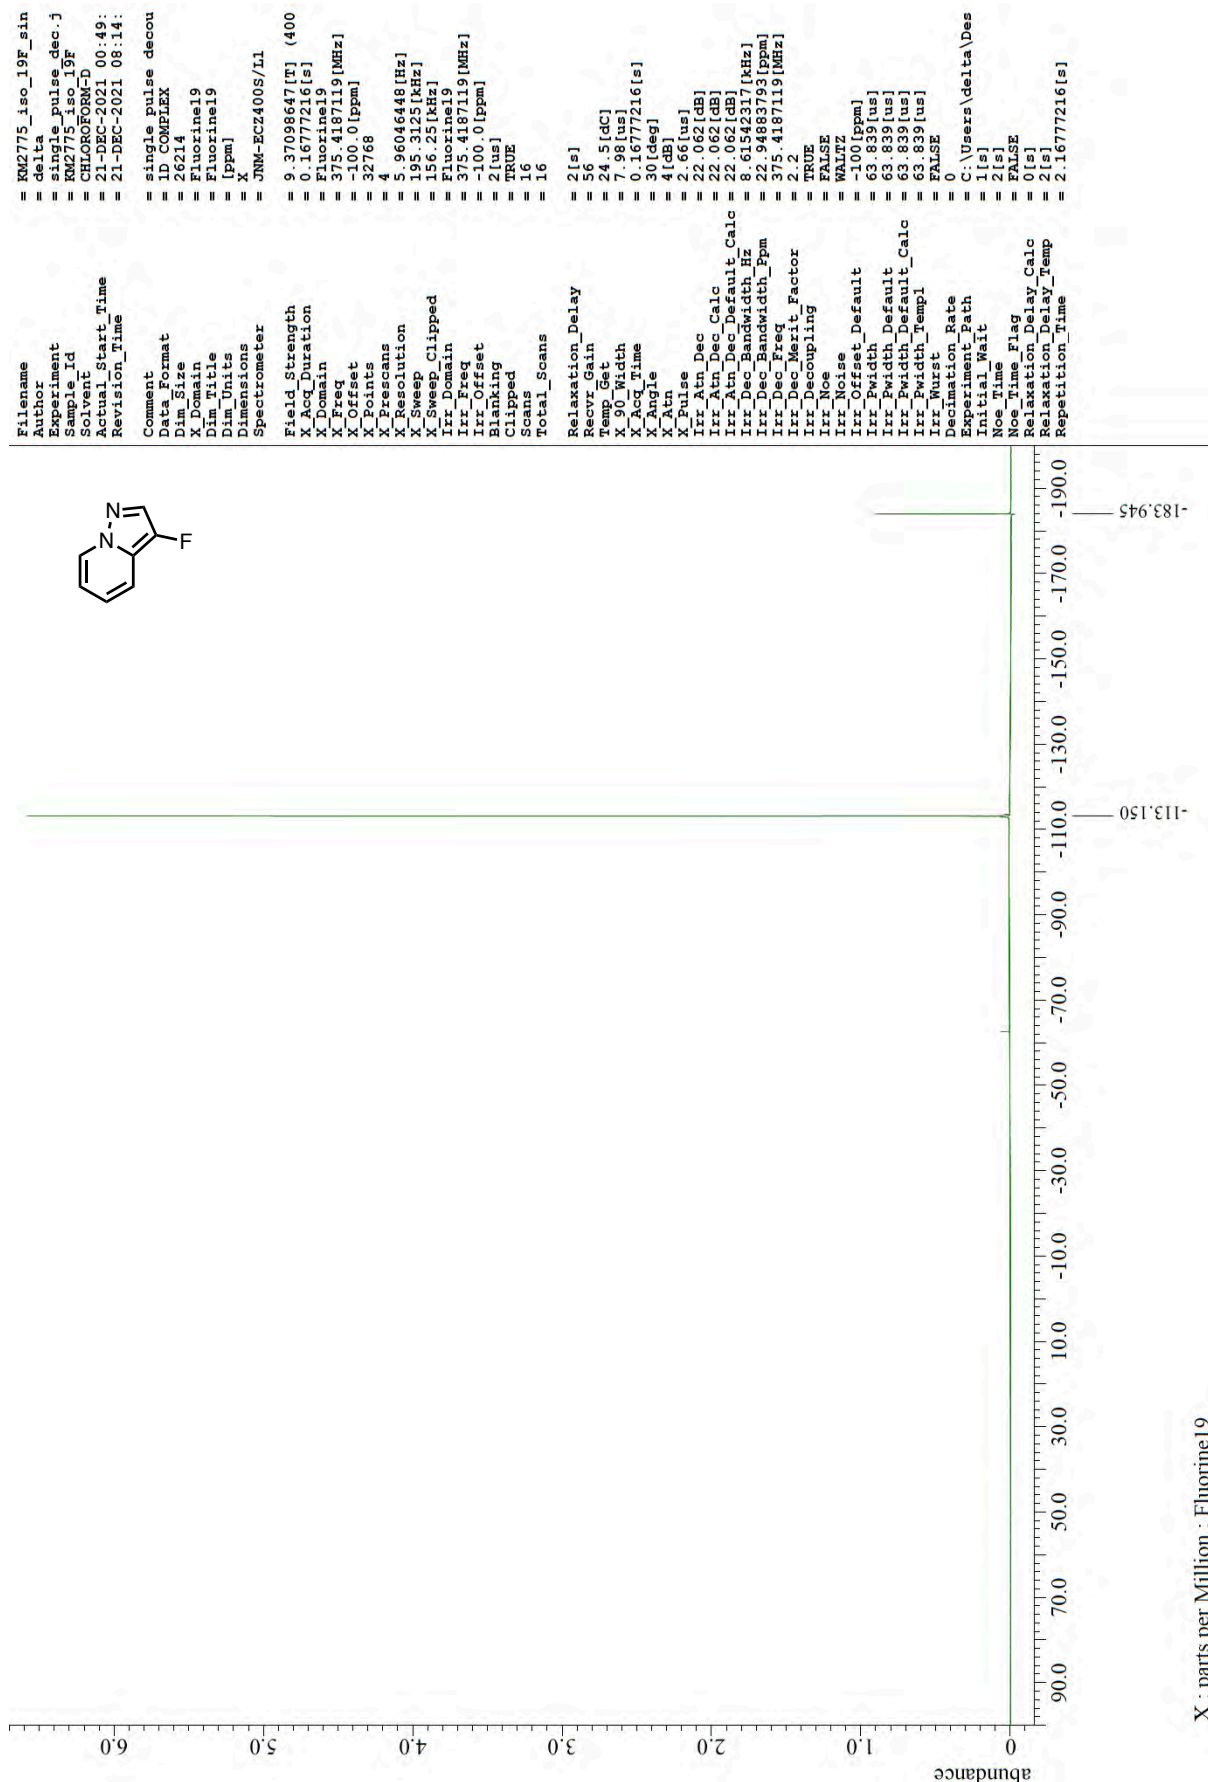

X : parts per Million : Fluorine19

<sup>1</sup>H NMR of 2AA (400 MHz, CDCl<sub>3</sub>)

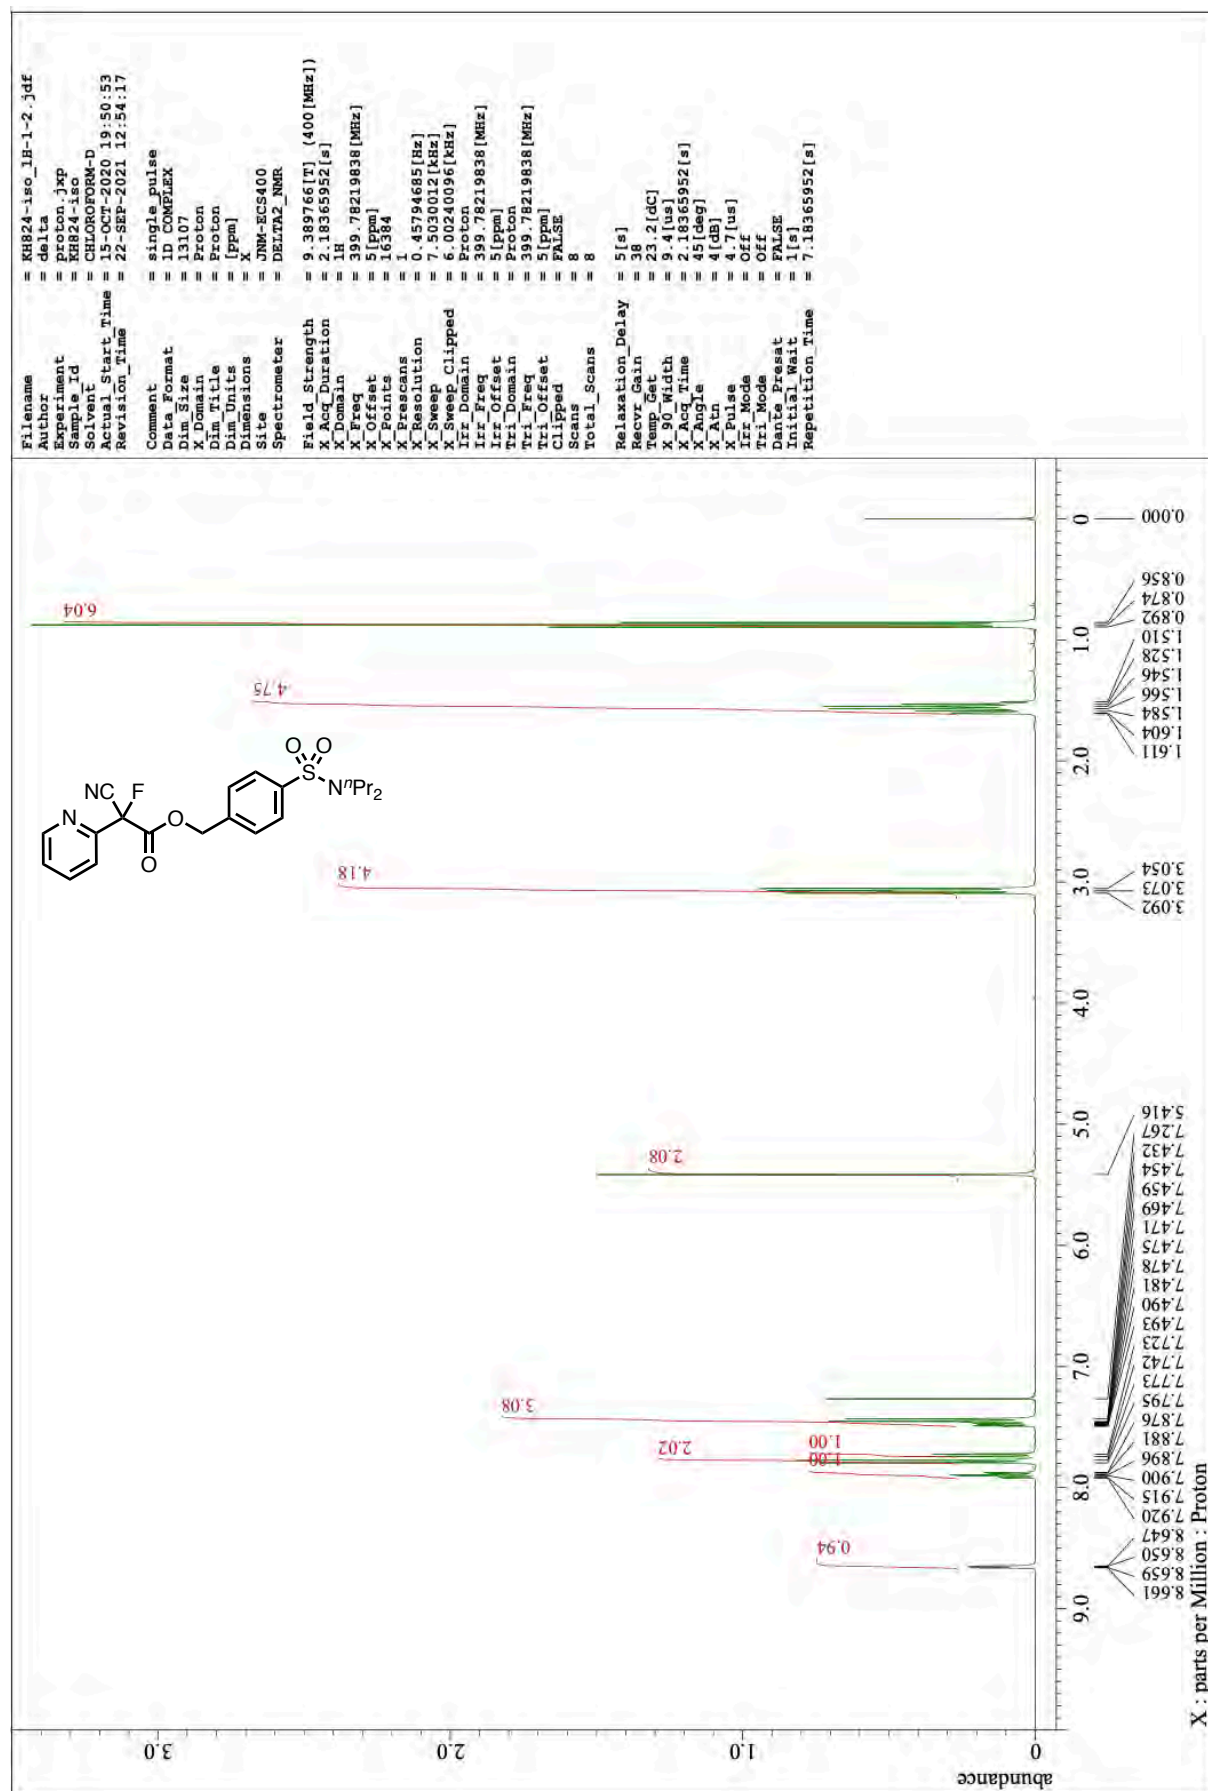



<sup>13</sup>C NMR of 2AA (101 MHz, CDCl<sub>3</sub>)

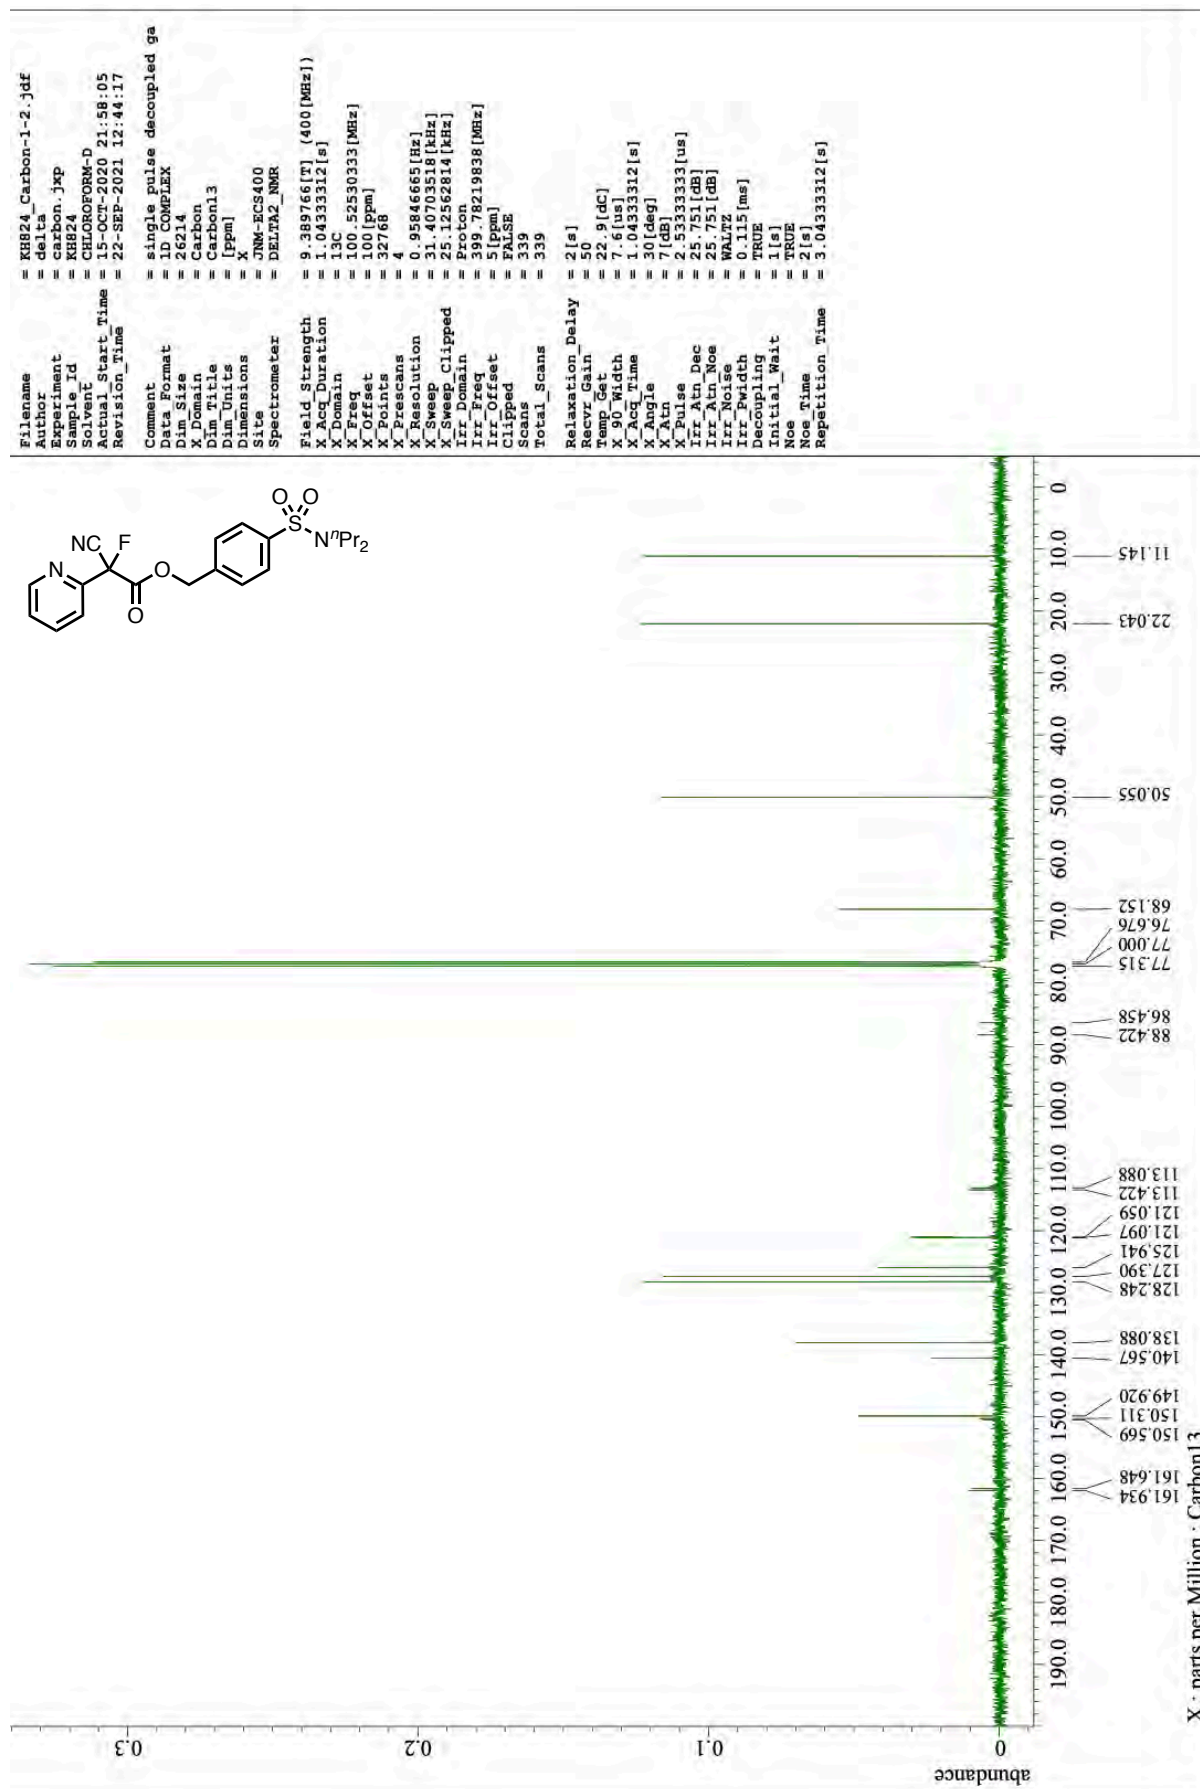

<sup>19</sup>F NMR of 2AA (376 MHz, CDCl<sub>3</sub>)

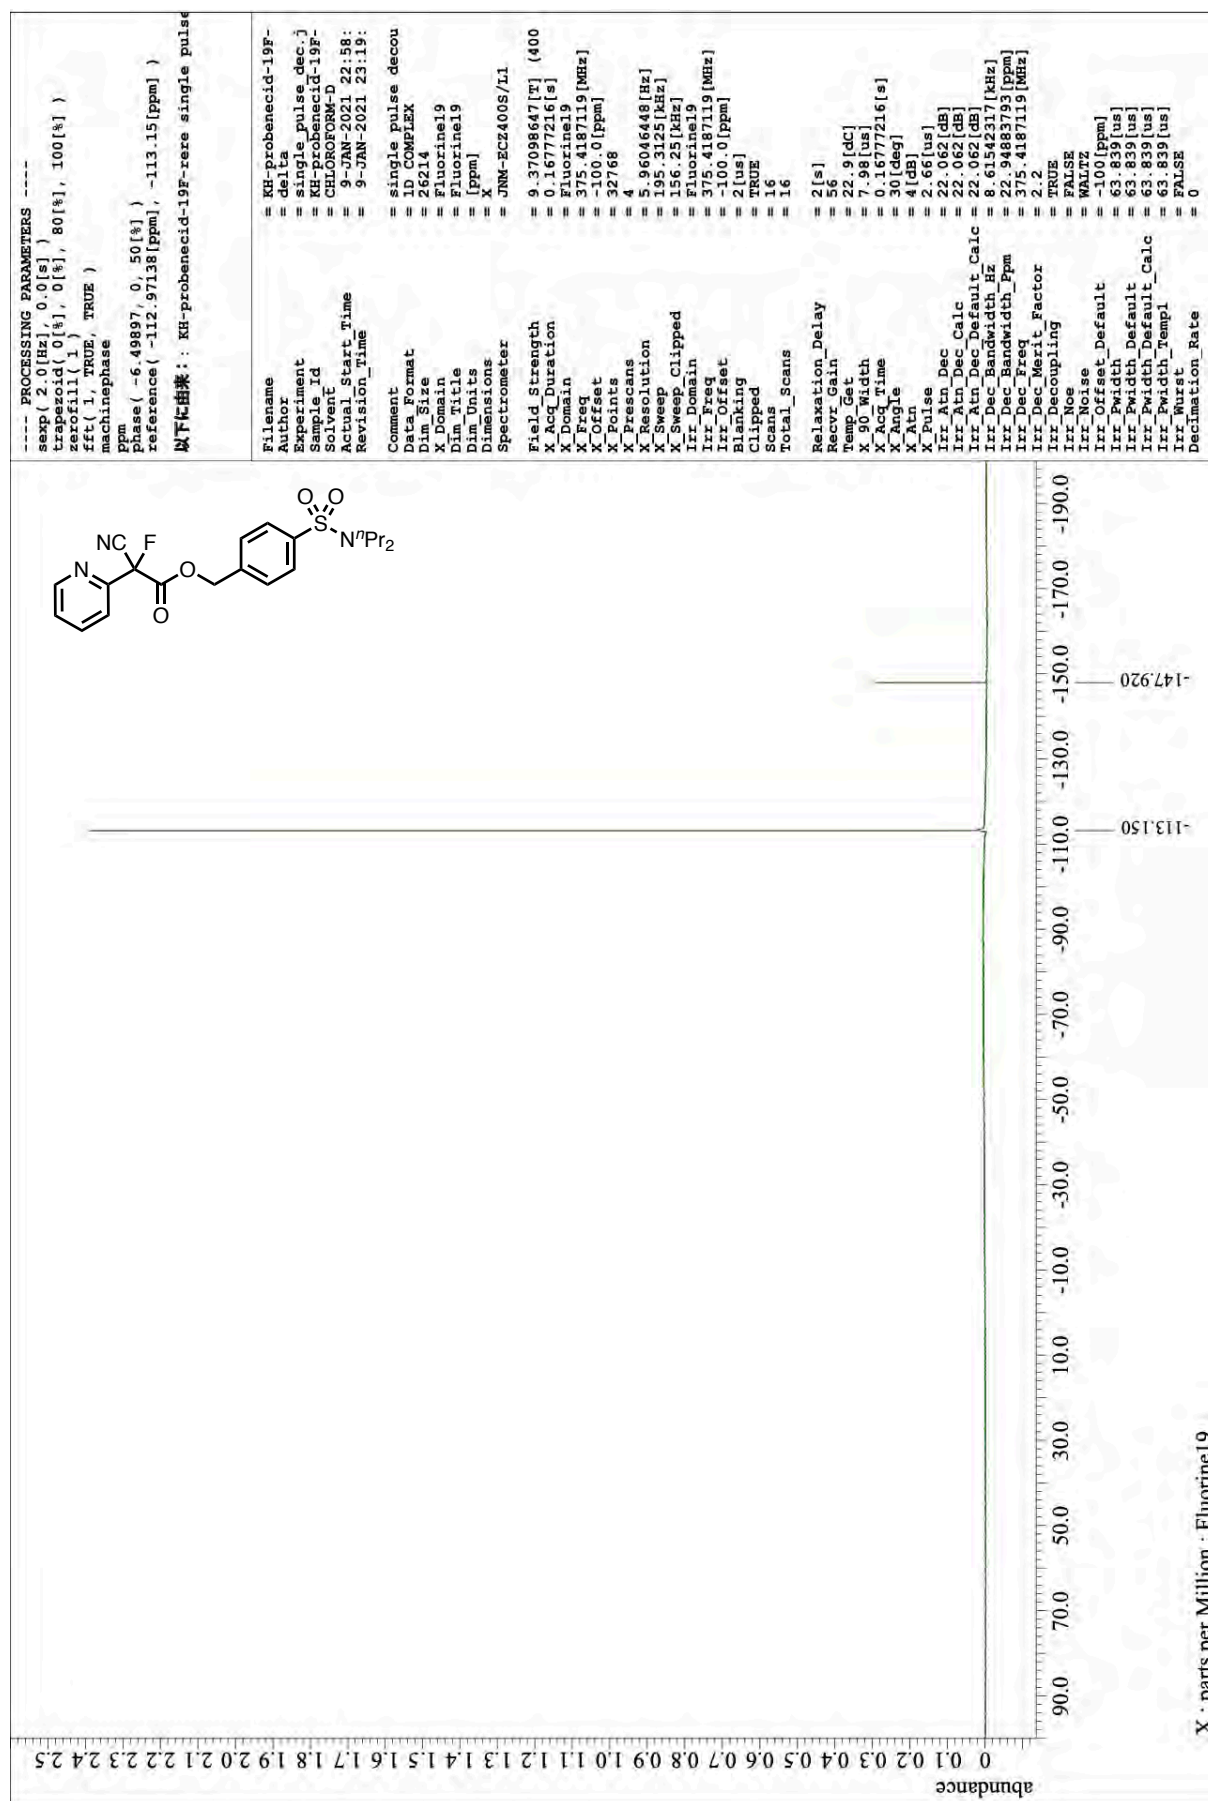

```

---- PROCESSING PARAMETERS ----
sexp( 2.0[Hz], 0.0[s] )
trapezoid( 0[%], 0[%], 80[%], 100[%] )
zerofill( 0 )
zfc( 1, TRUE, TRUE )
machinephase
Ppm
Phase( -6.49897, 0.50[%] )
reference( -112.97138[ppm], -113.15[ppm] )
以下に由来: KH-probenecid-19F-rere single pulse
    
```

```

Filename = KH-probenecid-19F-
Author = delta
Experiment = single_pulse_dec.j
Sample Id = KH-probenecid-19F-
Solvent = CHLOROFORM-D
Actual_Start_Time = 9-JAN-2021 22:58:
Revision_Time = 9-JAN-2021 23:19:
Comment = single pulse decou
Data Format = ID COMPLEX
Dim Size = 26214
X_Domain = Fluorine19
Dim Title = Fluorine19
Dim Units = [ppm]
Dimensions = X
Spectrometer = JNM-ECZ400S/L1
Field Strength = 9.37098647[T] (400
X_Acq_Duration = 9.1677216[s]
X_Domain = Fluorine19
X_Freq = 375.4187119[Mhz]
X_Offset = -100.0[ppm]
X_Points = 32768
X_Prescans = 5
X_Resolution = 5.9604648[Hz]
X_Sweep = 105.3125[kHz]
X_Sweep_Clippped = 156.25[kHz]
Irr_Domain = Fluorine19
Irr_Freq = 375.4187119[Mhz]
Irr_Offset = -100.0[ppm]
Irr_Pulse = 2[us]
Blanking = TRUE
Clipped = TRUE
Scans = 16
Total_Scans = 16
Relaxation_Delay = 2[s]
Recvr Gain = 56
Temp Get = 22.9[dc]
X_90_Width = 7.98[us]
X_Acq_Time = 0.1677216[s]
X_Angle = 30[deg]
X_Atn = 4[db]
X_Pulse = 2.66[us]
Irr_Atn_Dec = 22.062[db]
Irr_Atn_Dec_Calc = 22.062[db]
Irr_Dec_Bandwidth_Hz = 8.61542317[kHz]
Irr_Dec_Bandwidth_Ppm = 22.94883793[ppm]
Irr_Dec_Freq = 375.4187119[Mhz]
Irr_Dec_Merit_Factor = 2.2
Irr_Decoupling = TRUE
Irr_Noise = FALSE
Irr_Offset_Default = WALTZ
Irr_Offset_Default = -100[ppm]
Irr_Width_Default = 63.839[us]
Irr_Width_Default_Calc = 63.839[us]
Irr_Width_Default_Calc = 63.839[us]
Irr_Wurst_Temp1 = 63.839[us]
Irr_Wurst = FALSE
Decimation_Rate = 0
    
```

<sup>1</sup>H NMR of 2AB (400 MHz, CDCl<sub>3</sub>)

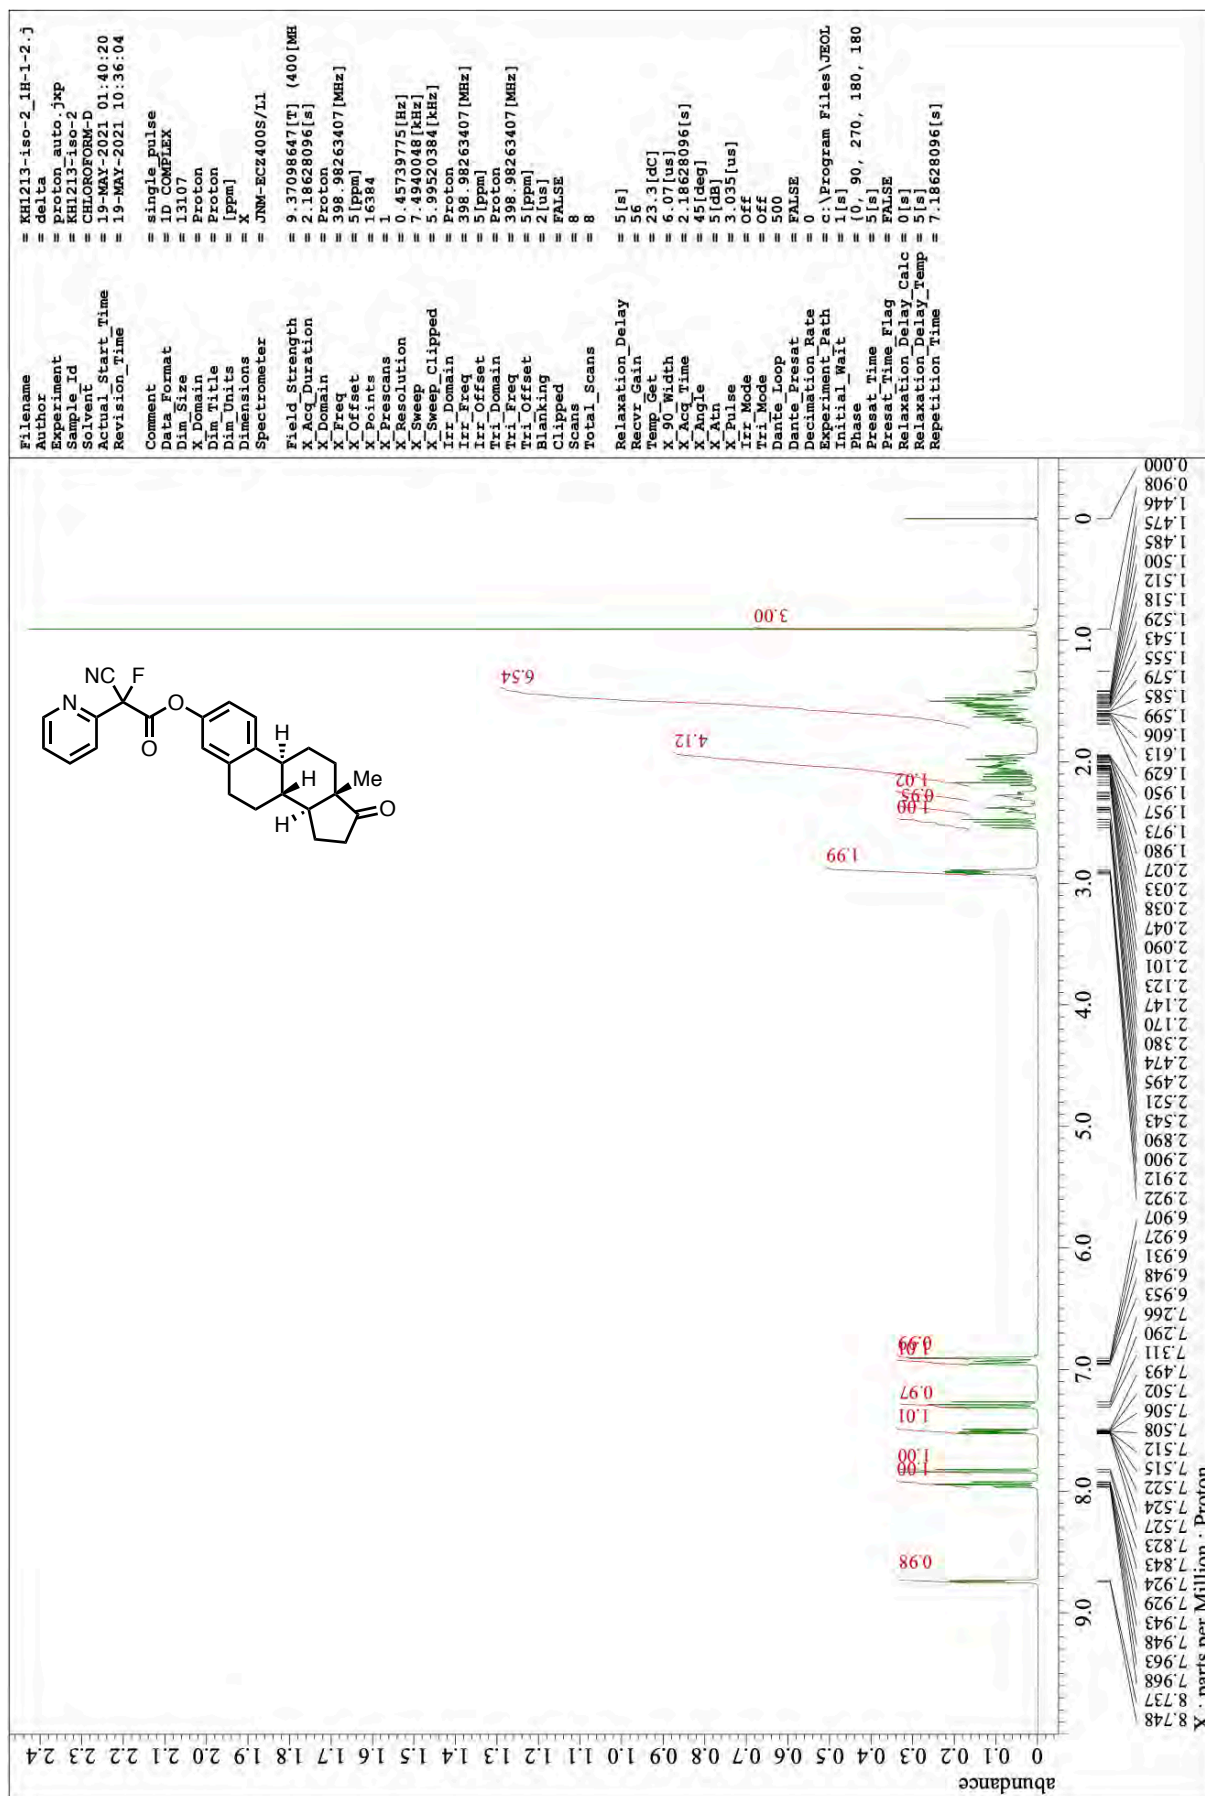

<sup>13</sup>C NMR of 2AB (101 MHz, CDCl<sub>3</sub>)

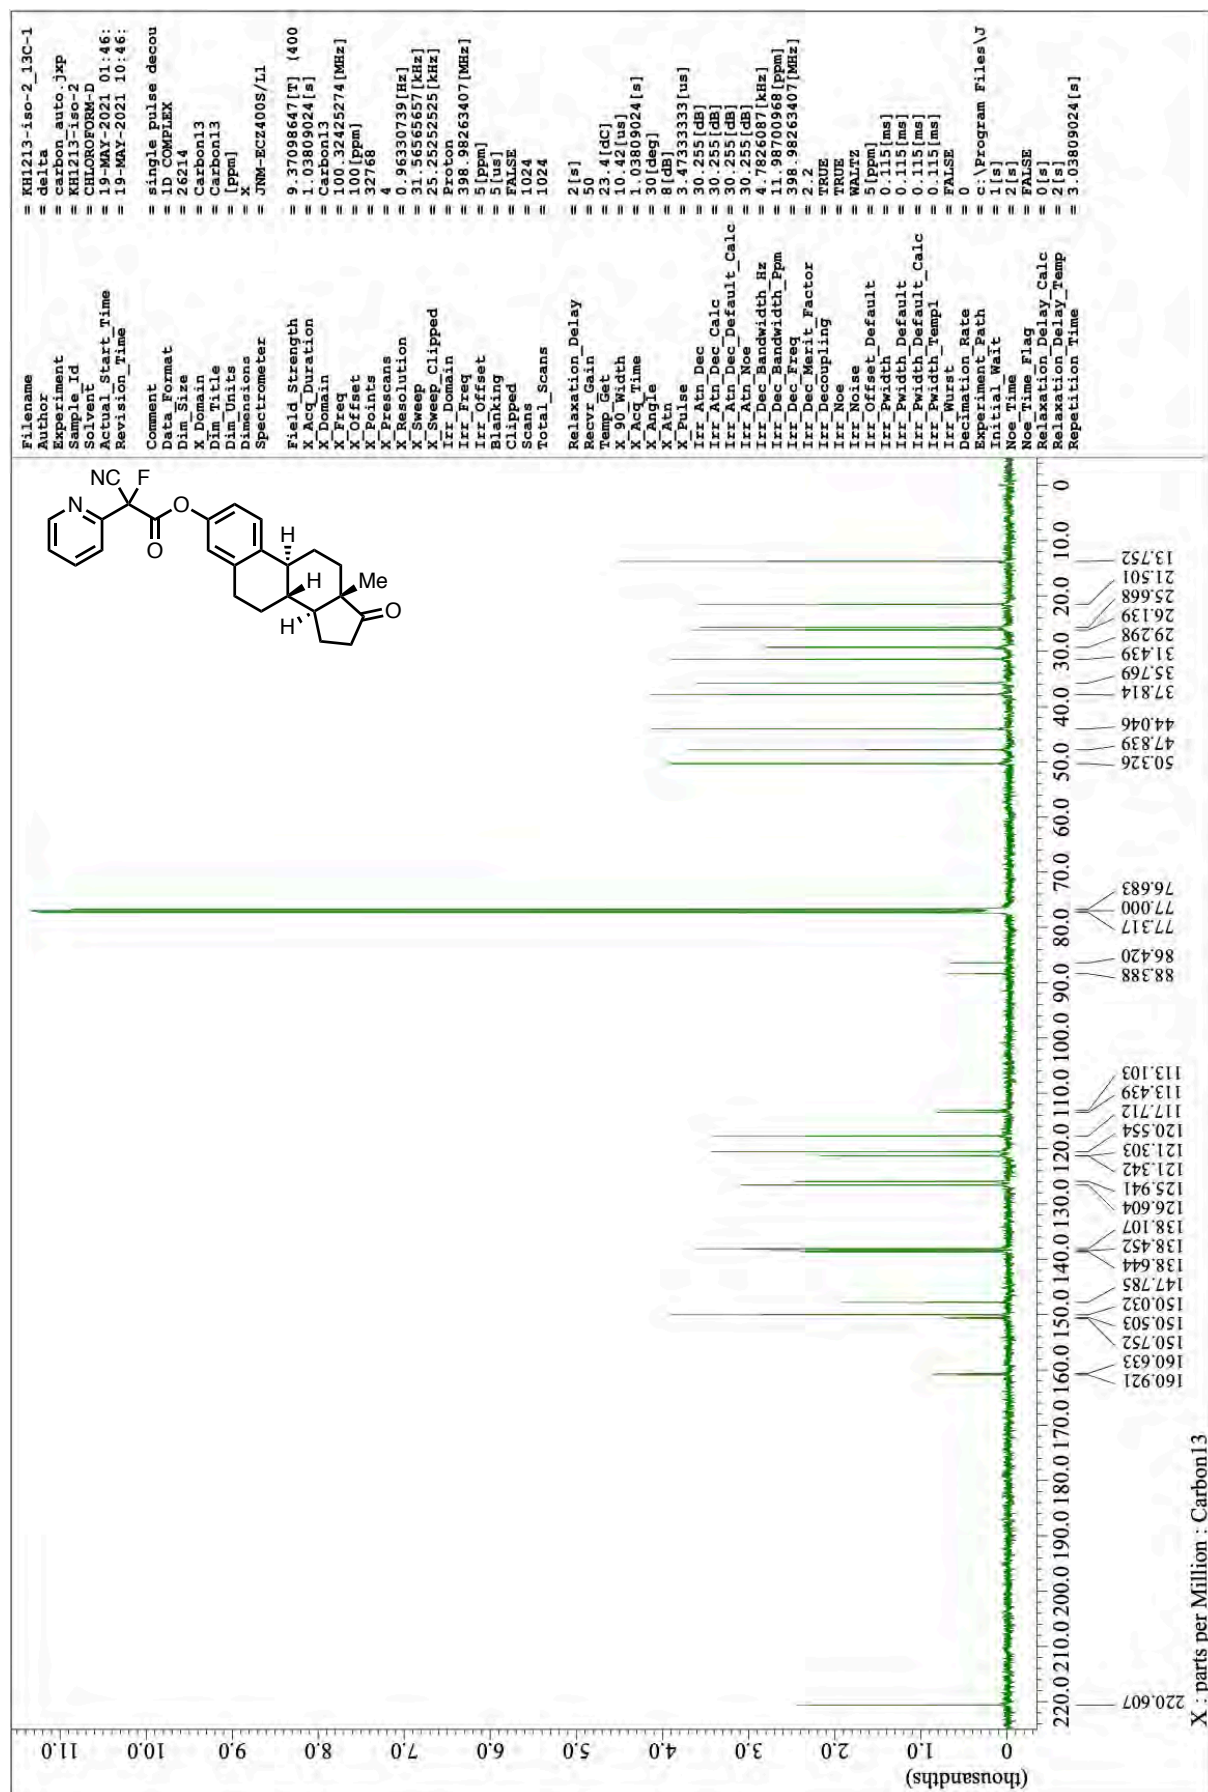

<sup>19</sup>F NMR of 2AB (376 MHz, CDCl<sub>3</sub>)

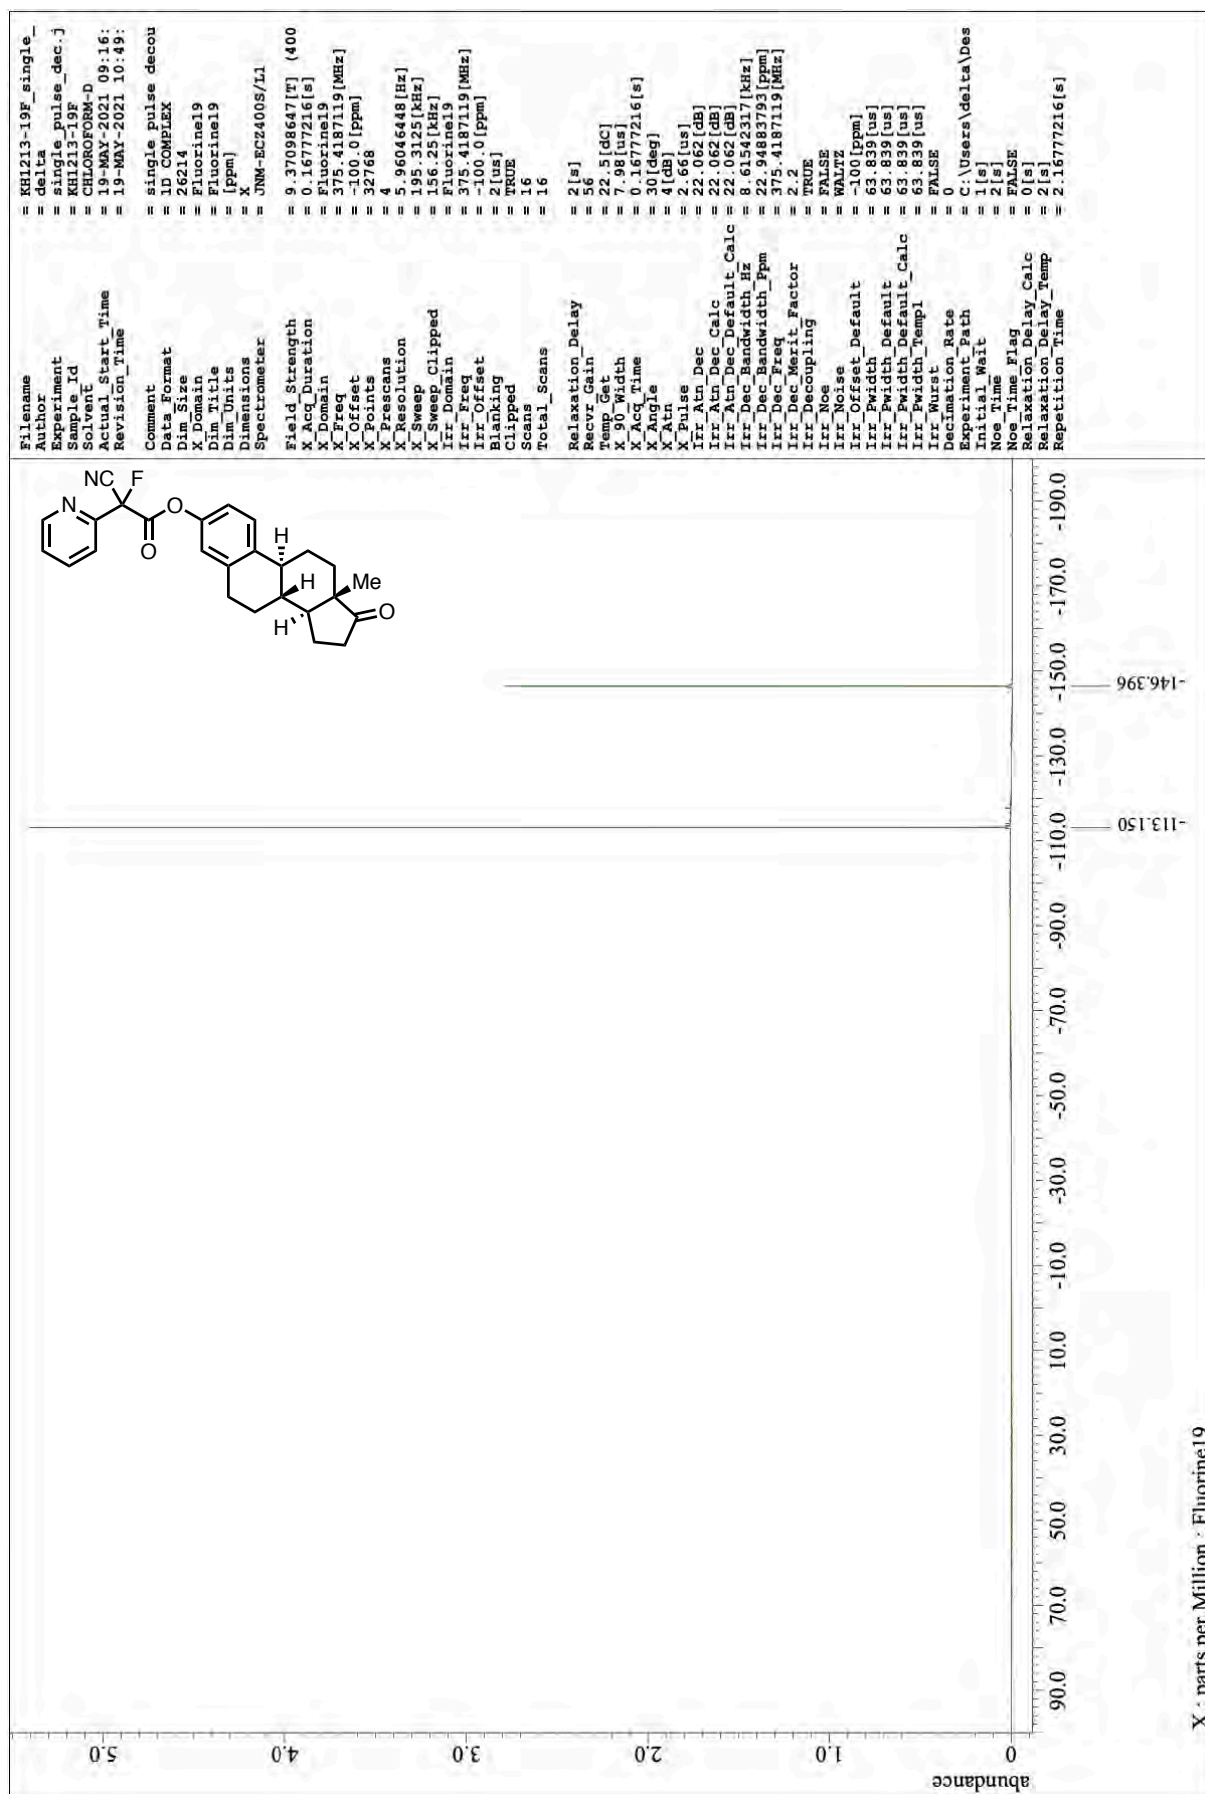

<sup>1</sup>H NMR of 2AC (400 MHz, CDCl<sub>3</sub>)

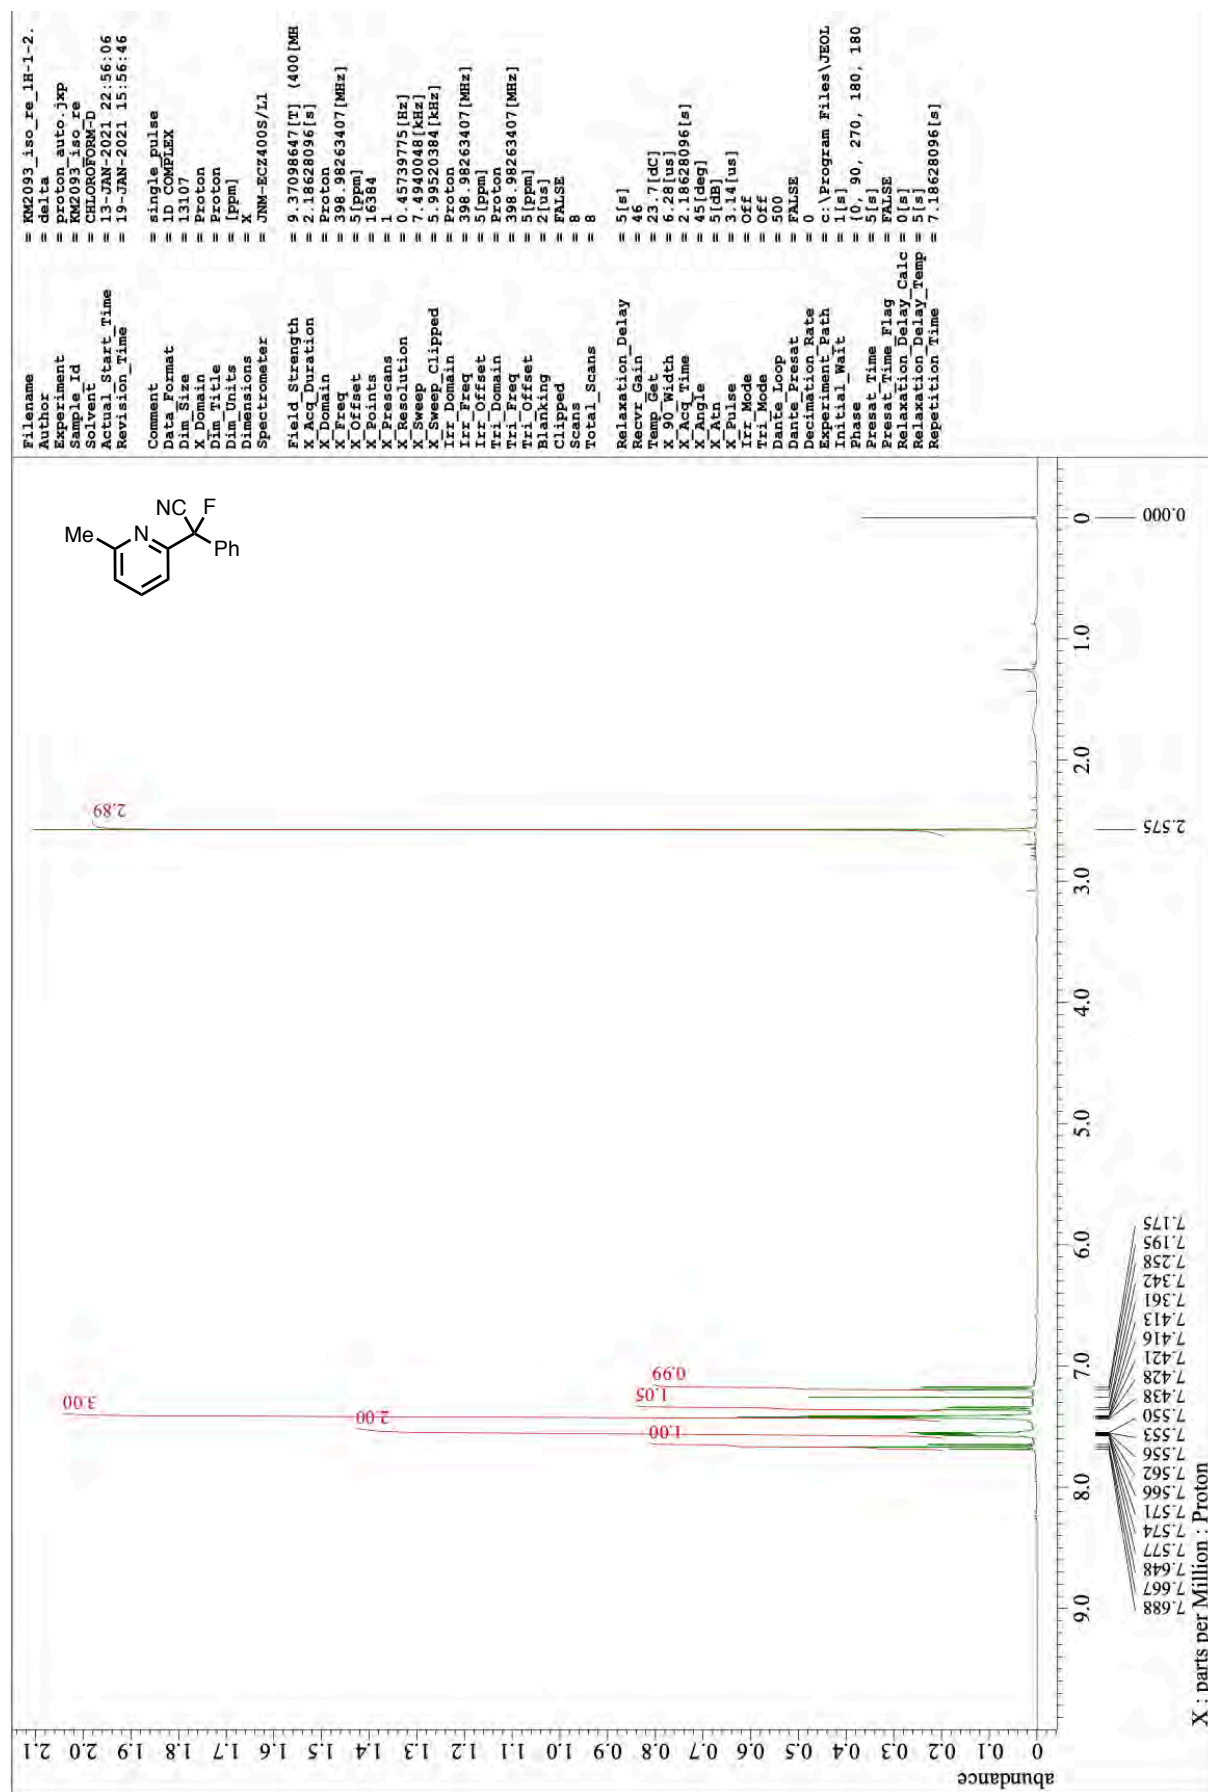

<sup>13</sup>C NMR of 2AC (101 MHz, CDCl<sub>3</sub>)

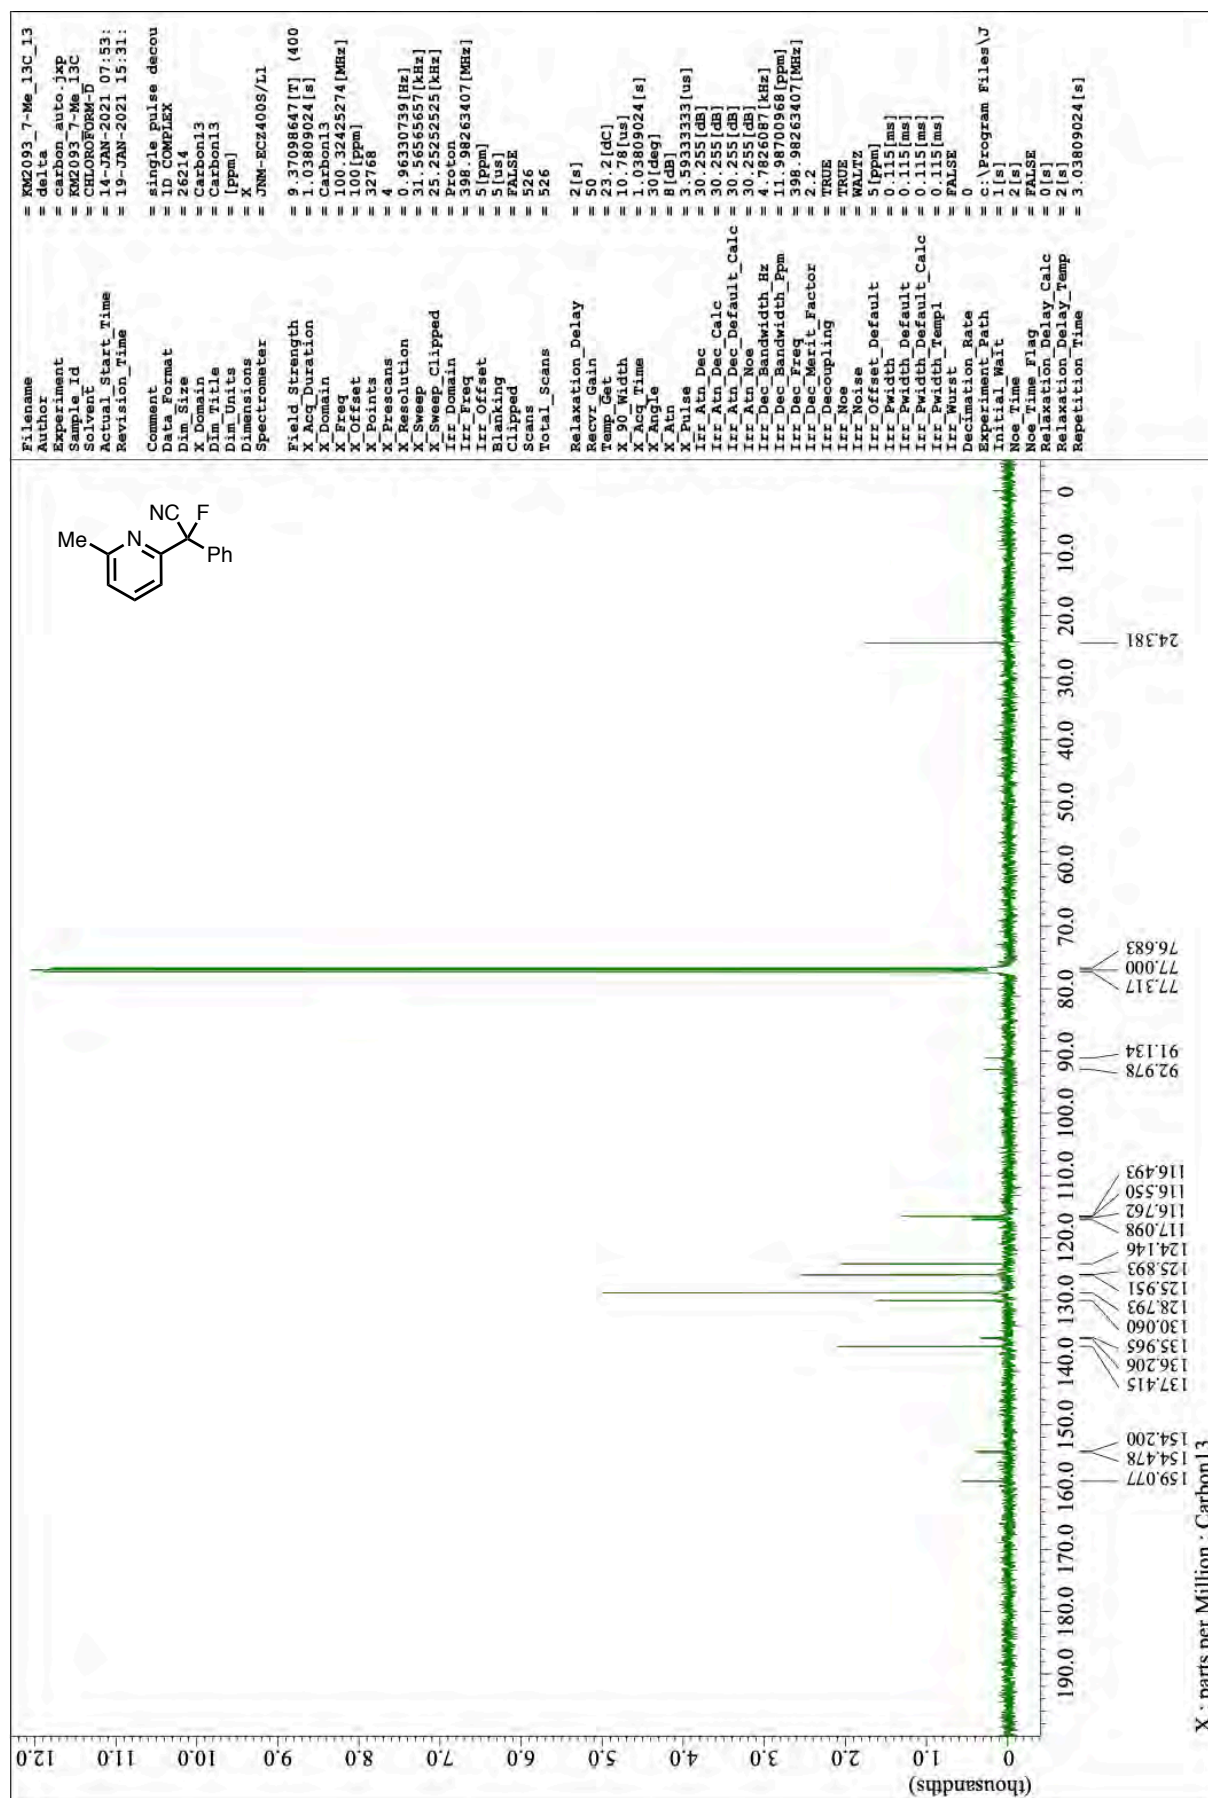

<sup>19</sup>F NMR of 2AC (376 MHz, CDCl<sub>3</sub>)

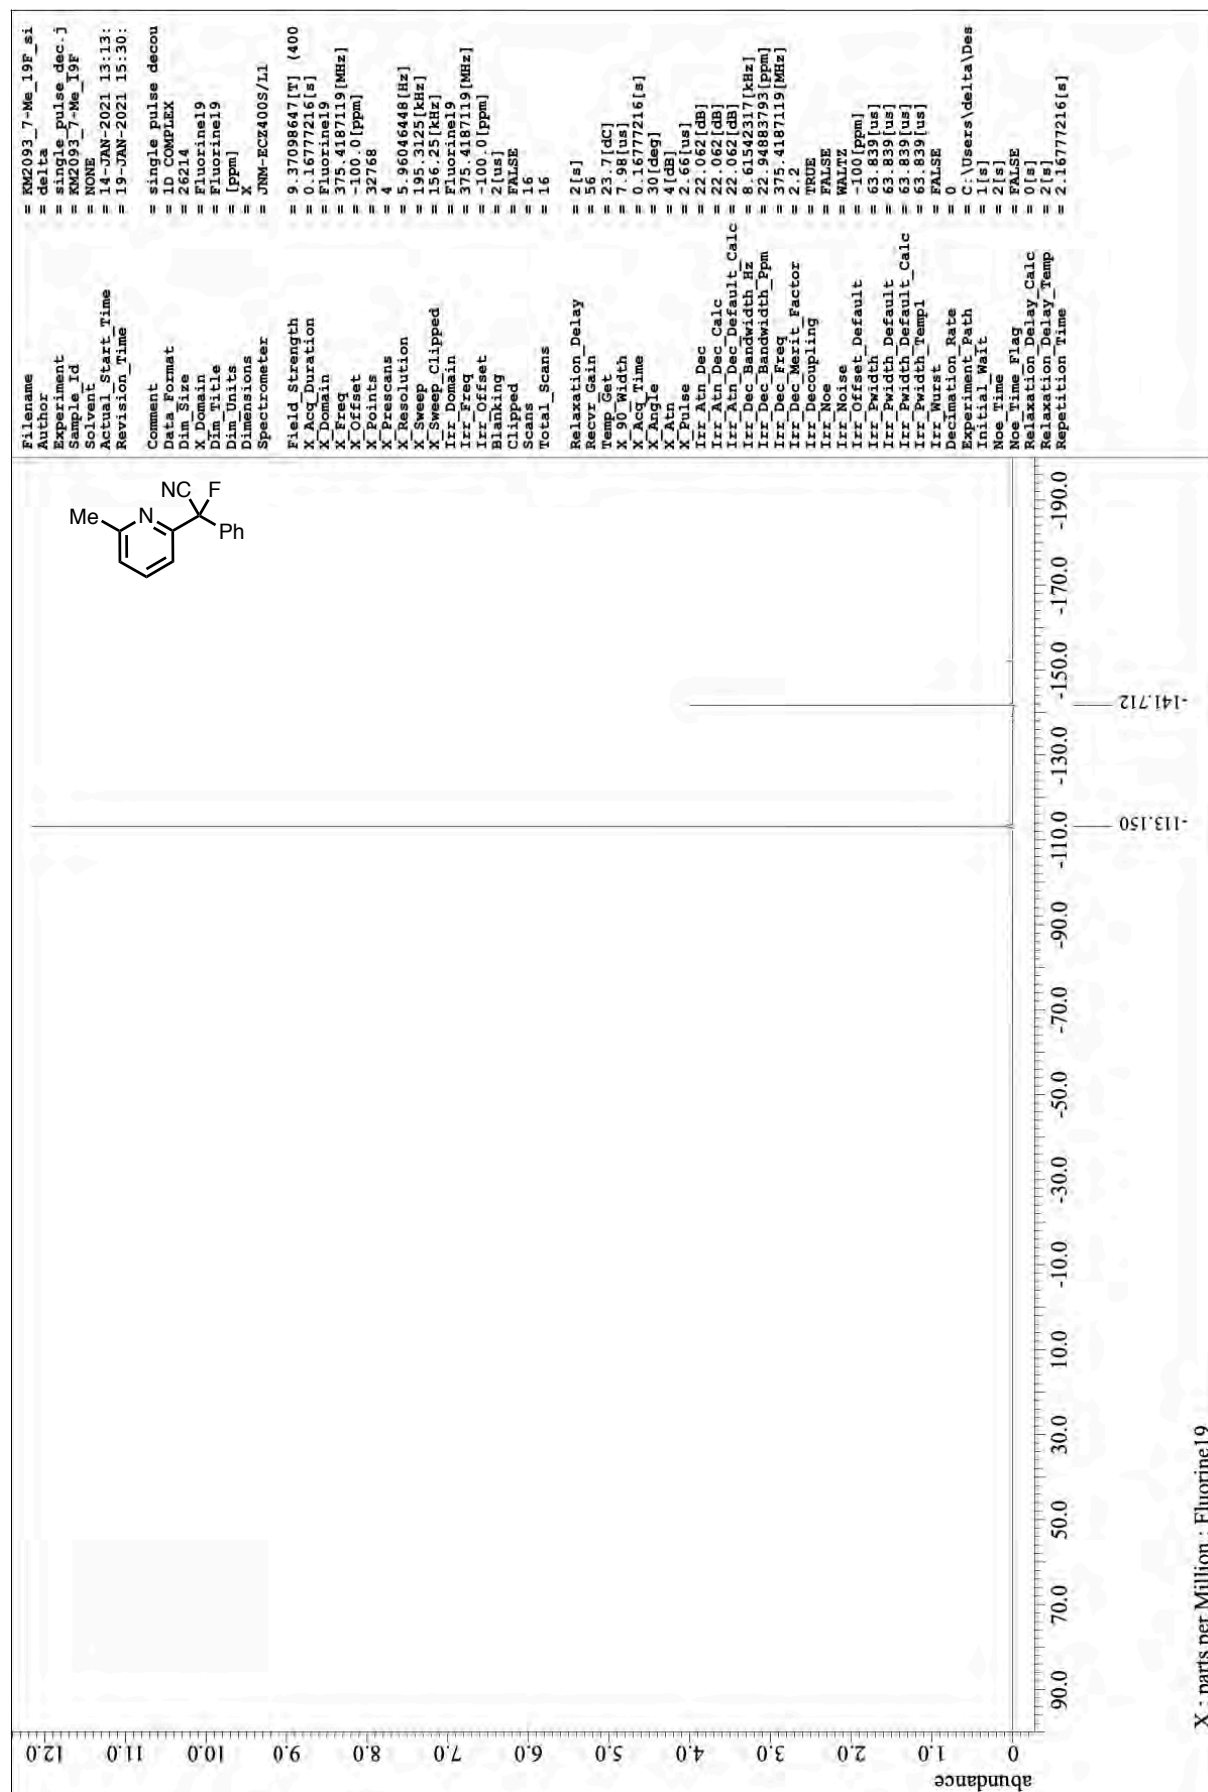



<sup>1</sup>H NMR of 2AD (400 MHz, CDCl<sub>3</sub>)

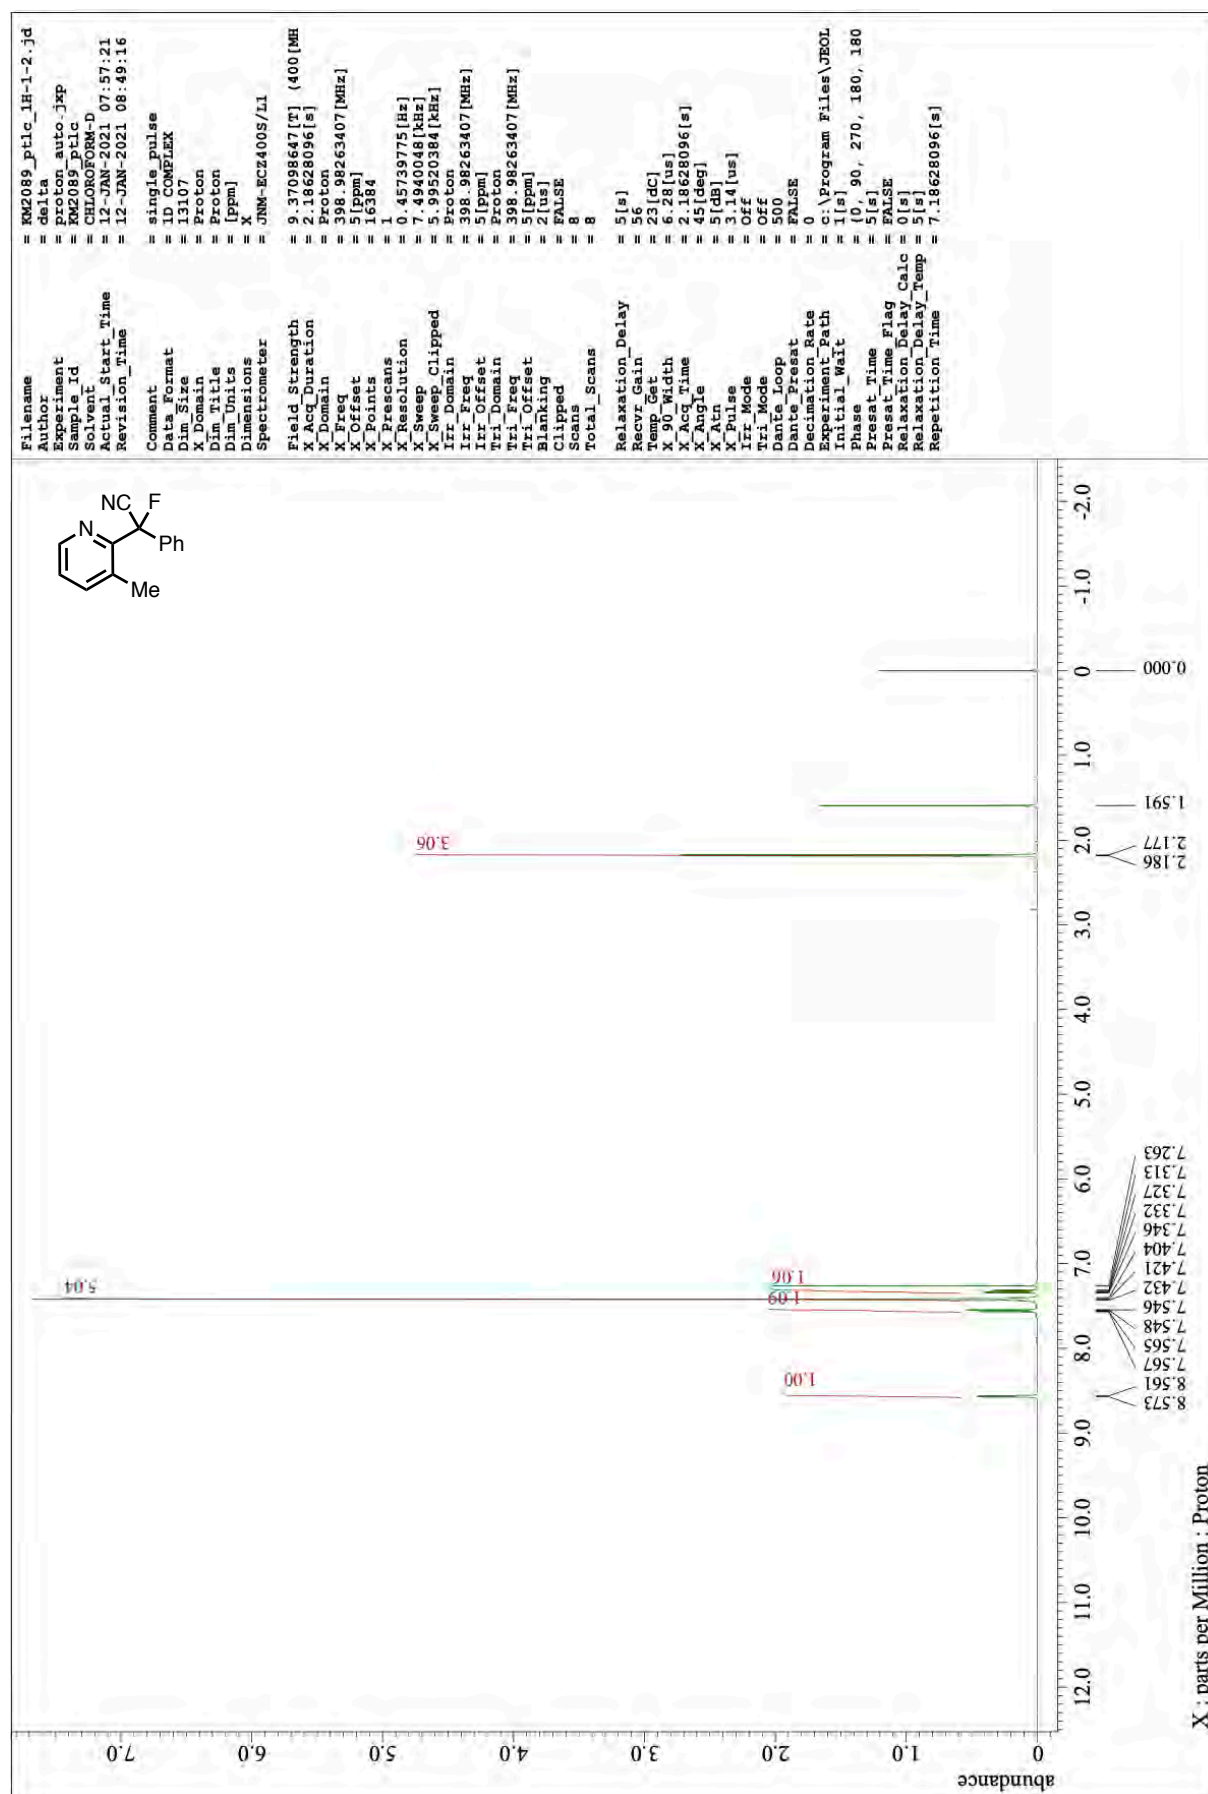

<sup>13</sup>C NMR of 2AD (101 MHz, CDCl<sub>3</sub>)

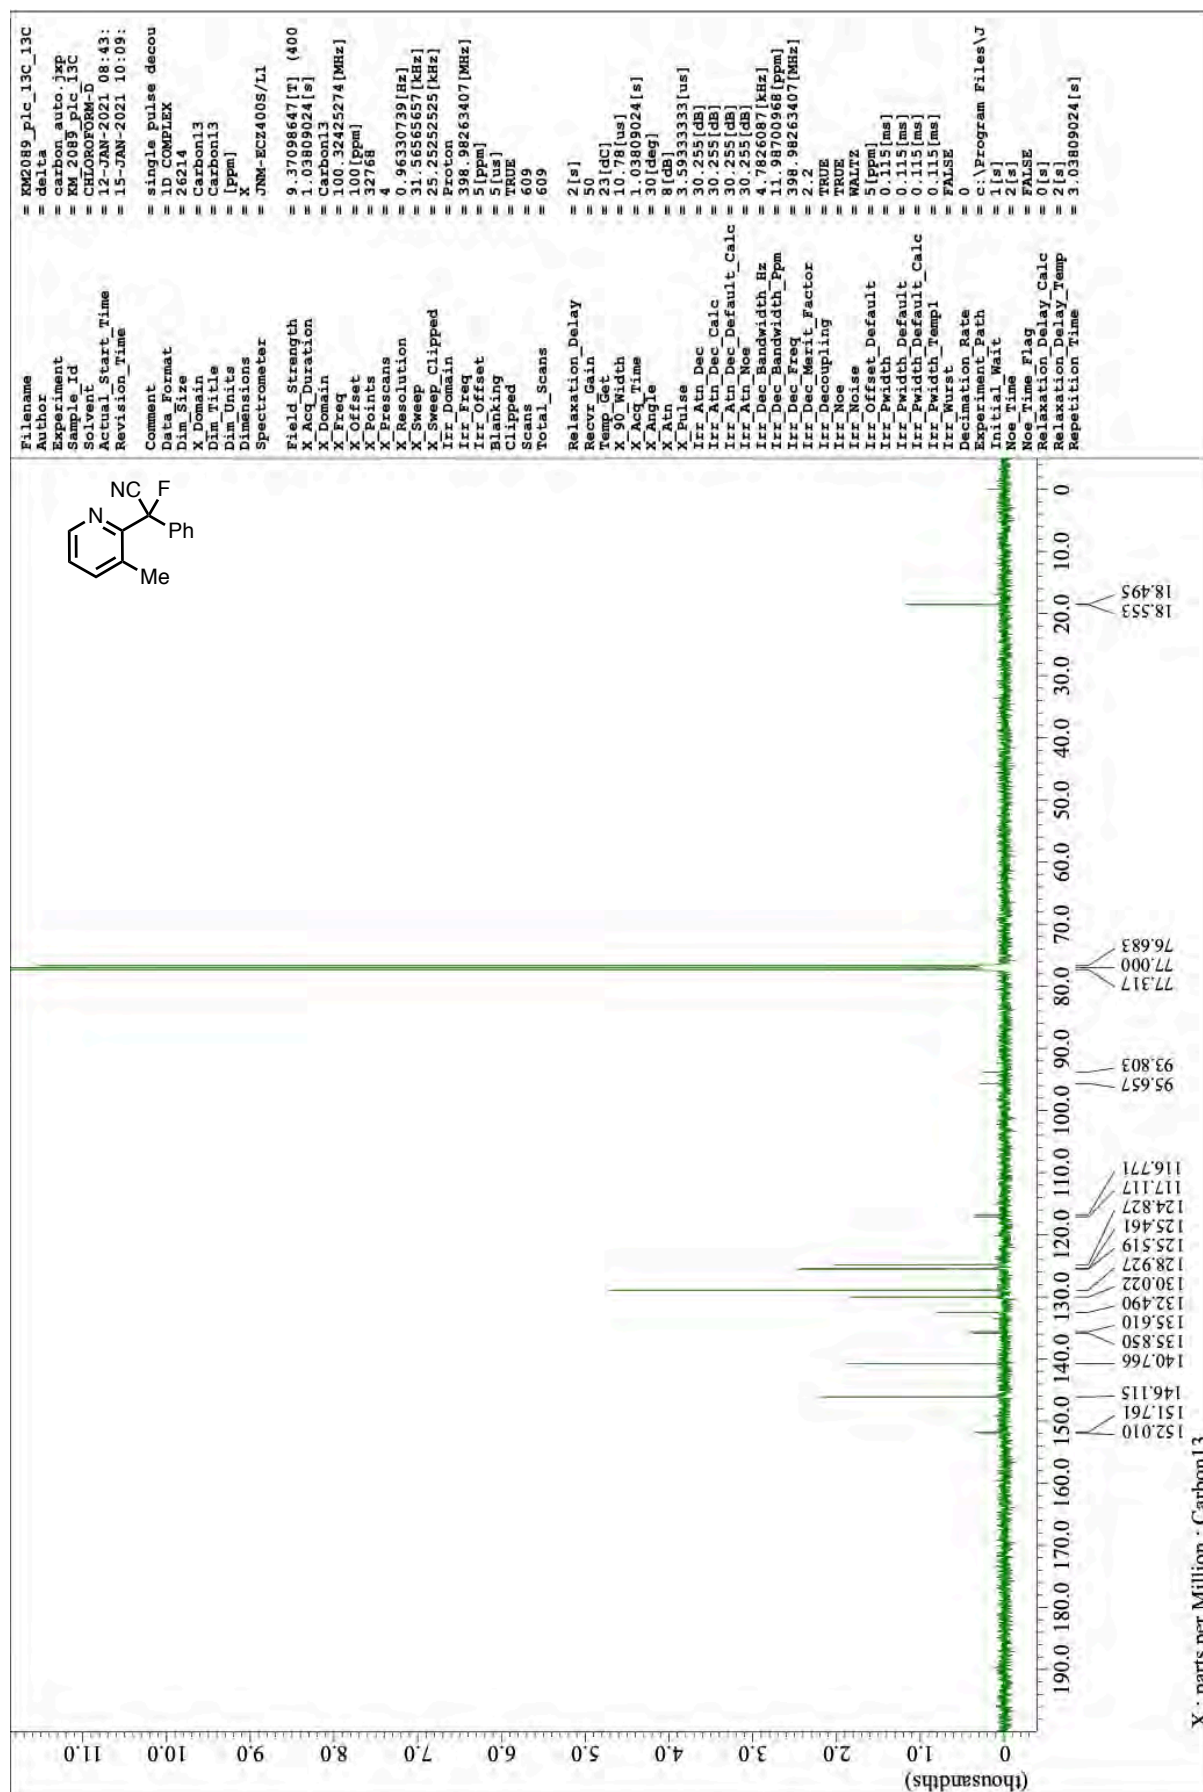

<sup>19</sup>F NMR of 2AD (376 MHz, CDCl<sub>3</sub>)

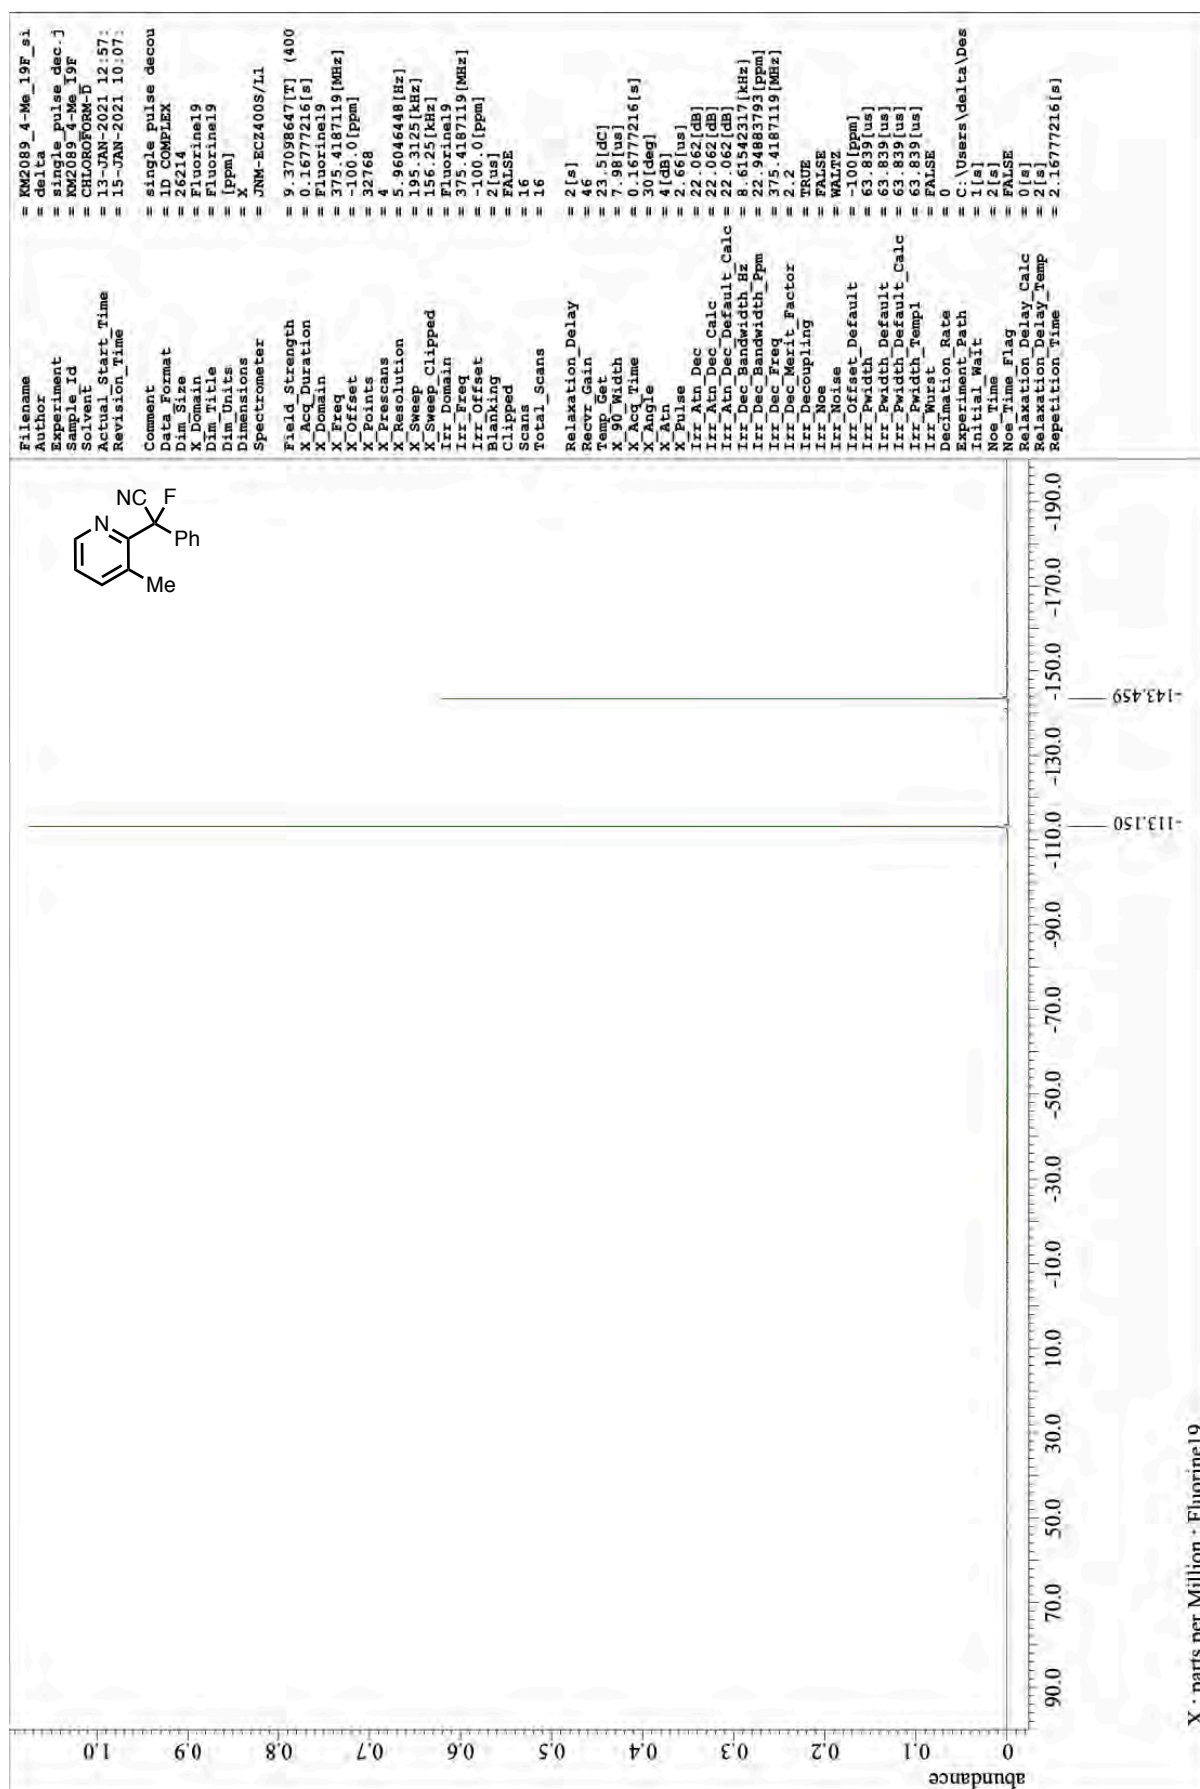

<sup>1</sup>H NMR of 2AE (400 MHz, CDCl<sub>3</sub>)

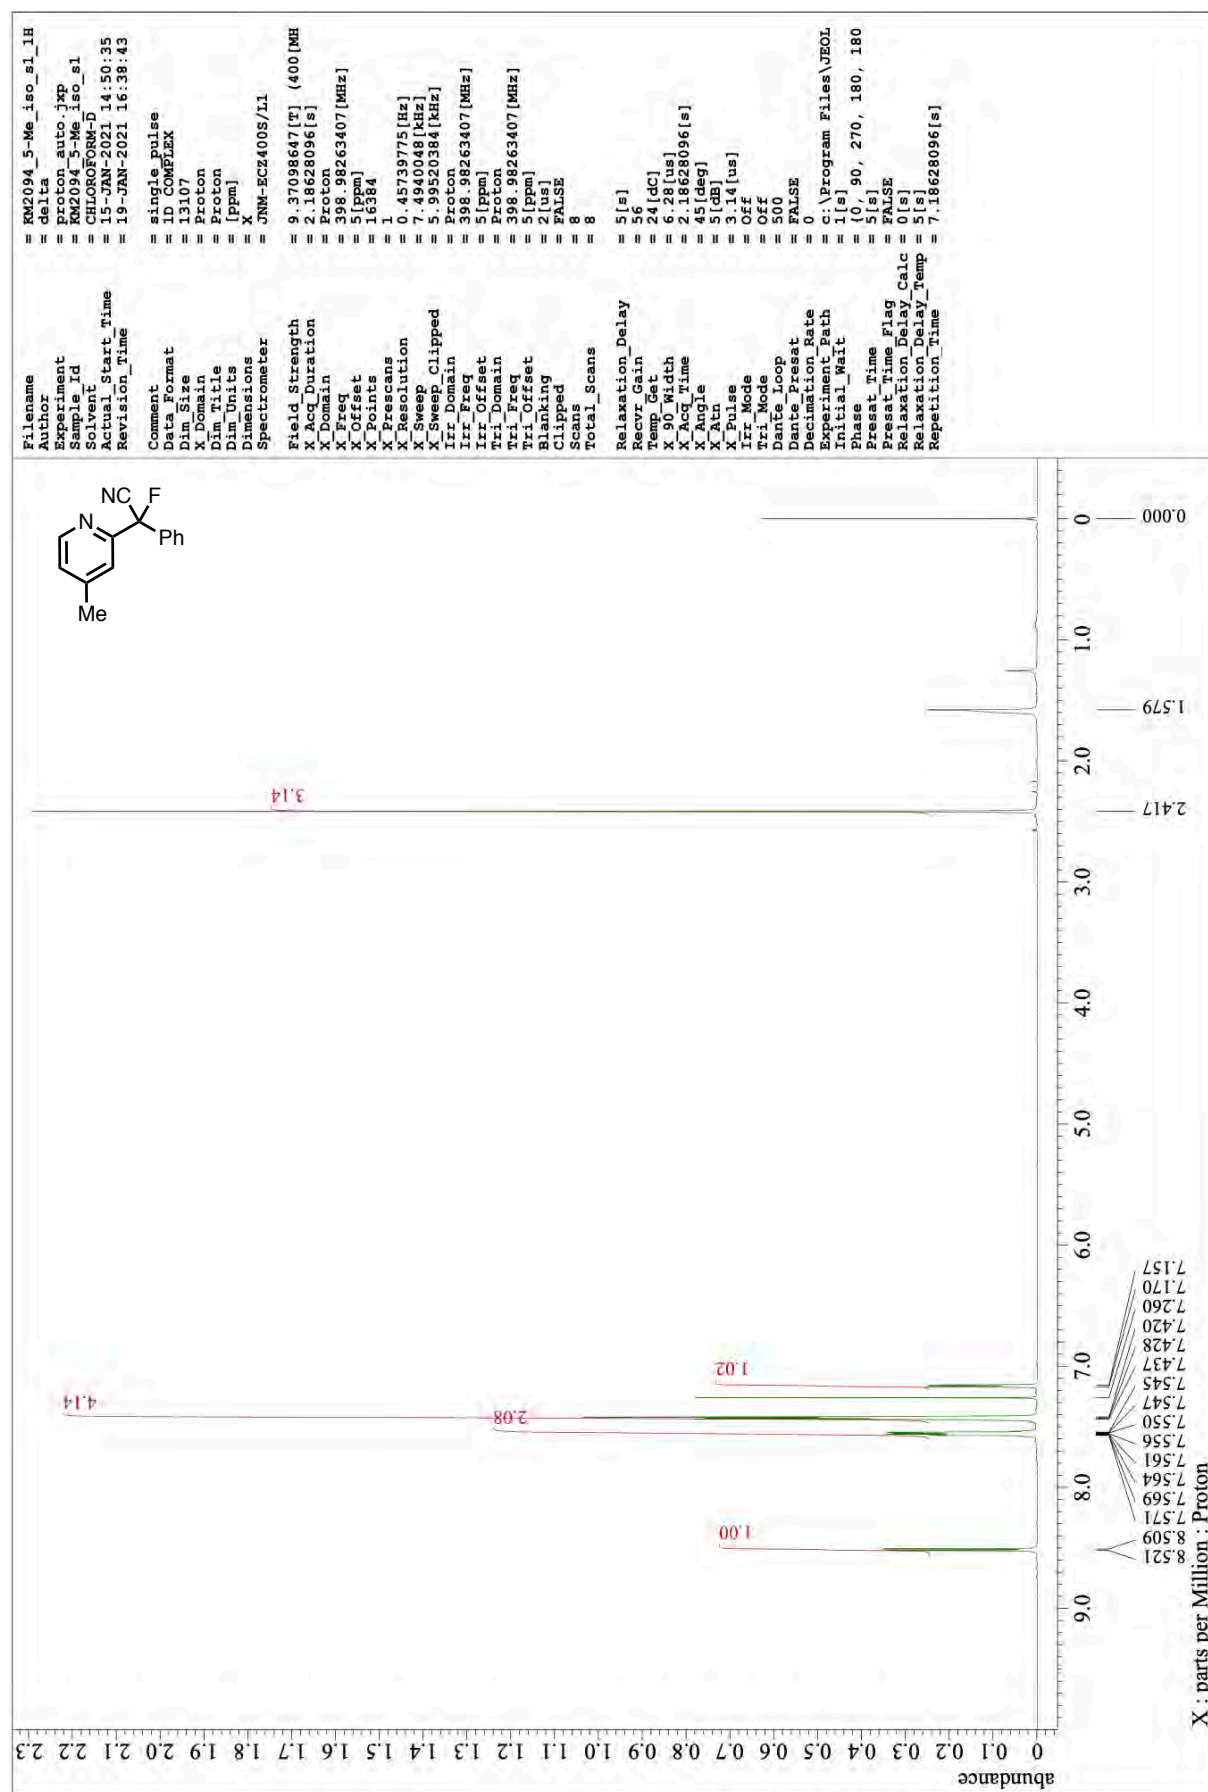

<sup>13</sup>C NMR of 2AE (101 MHz, CDCl<sub>3</sub>)

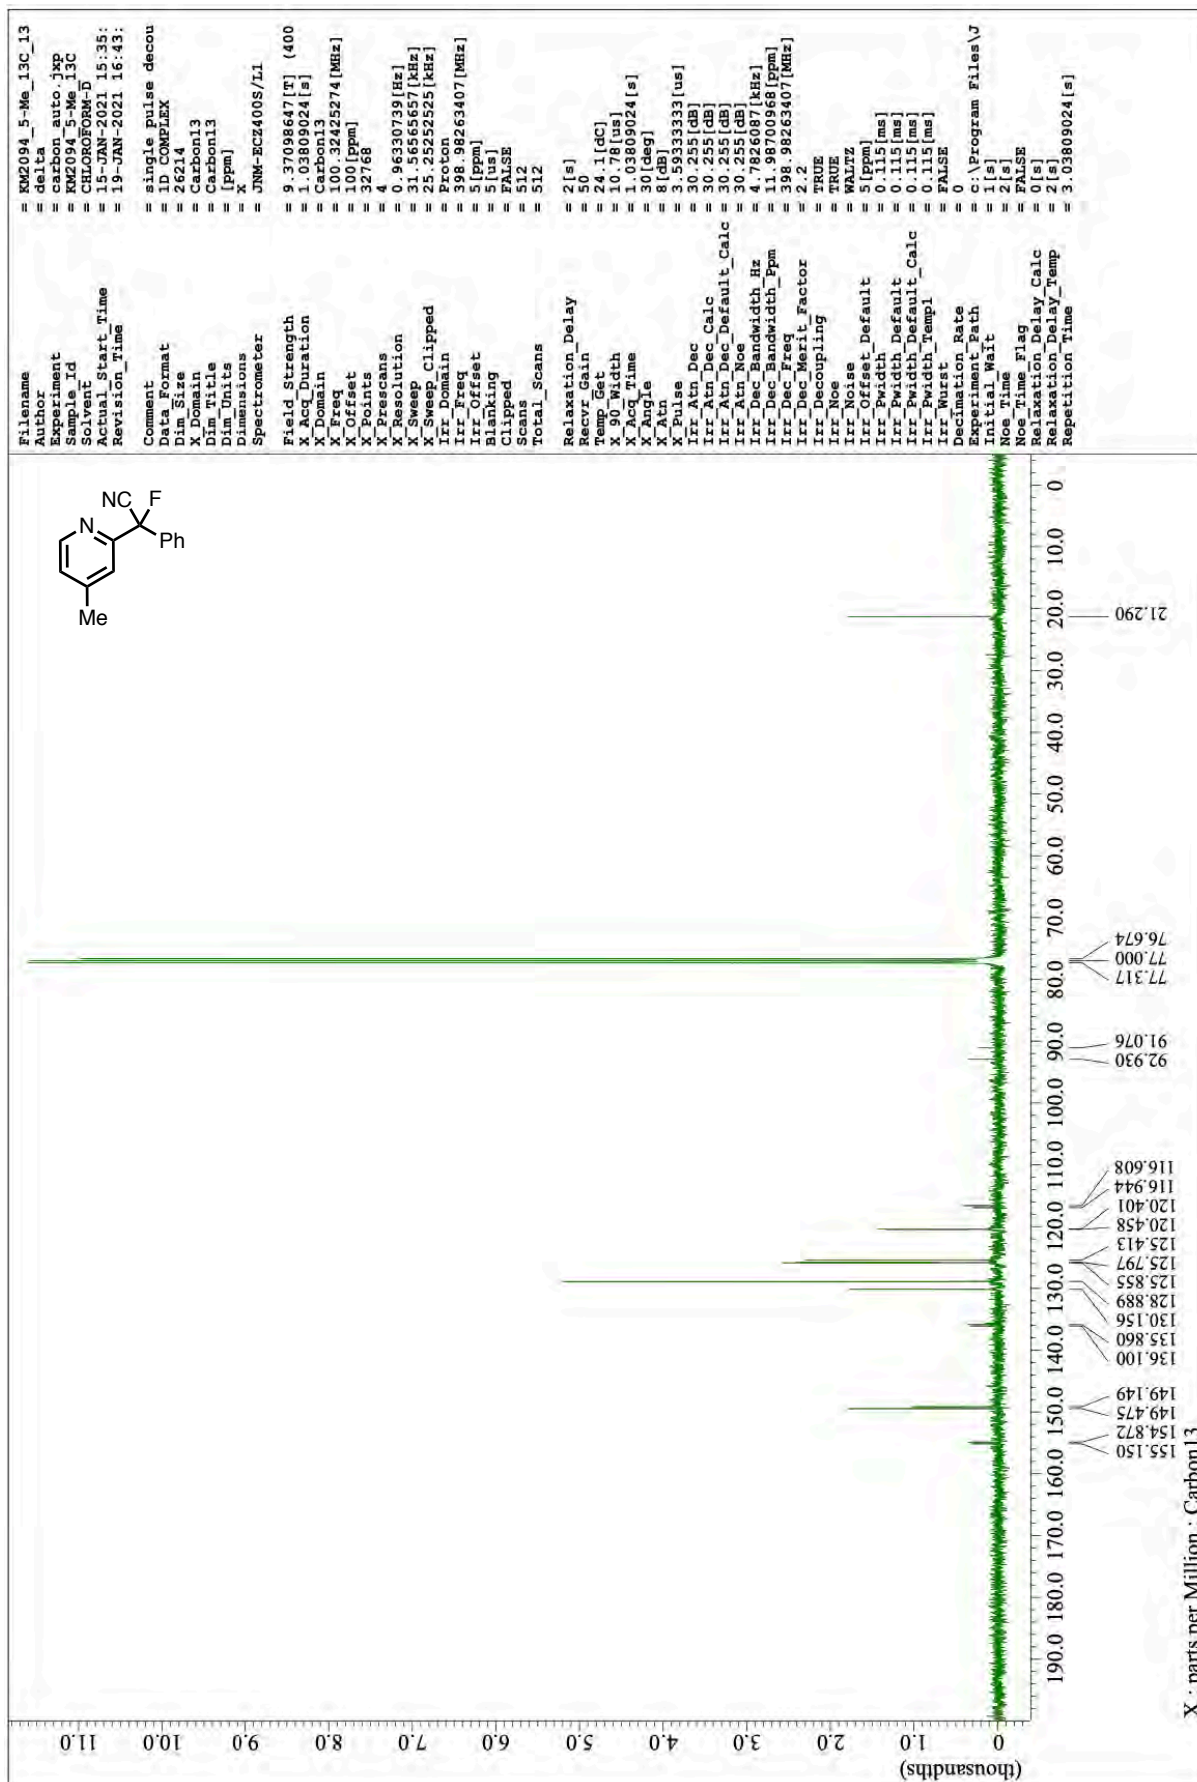

<sup>19</sup>F NMR of 2AE (376 MHz, CDCl<sub>3</sub>)

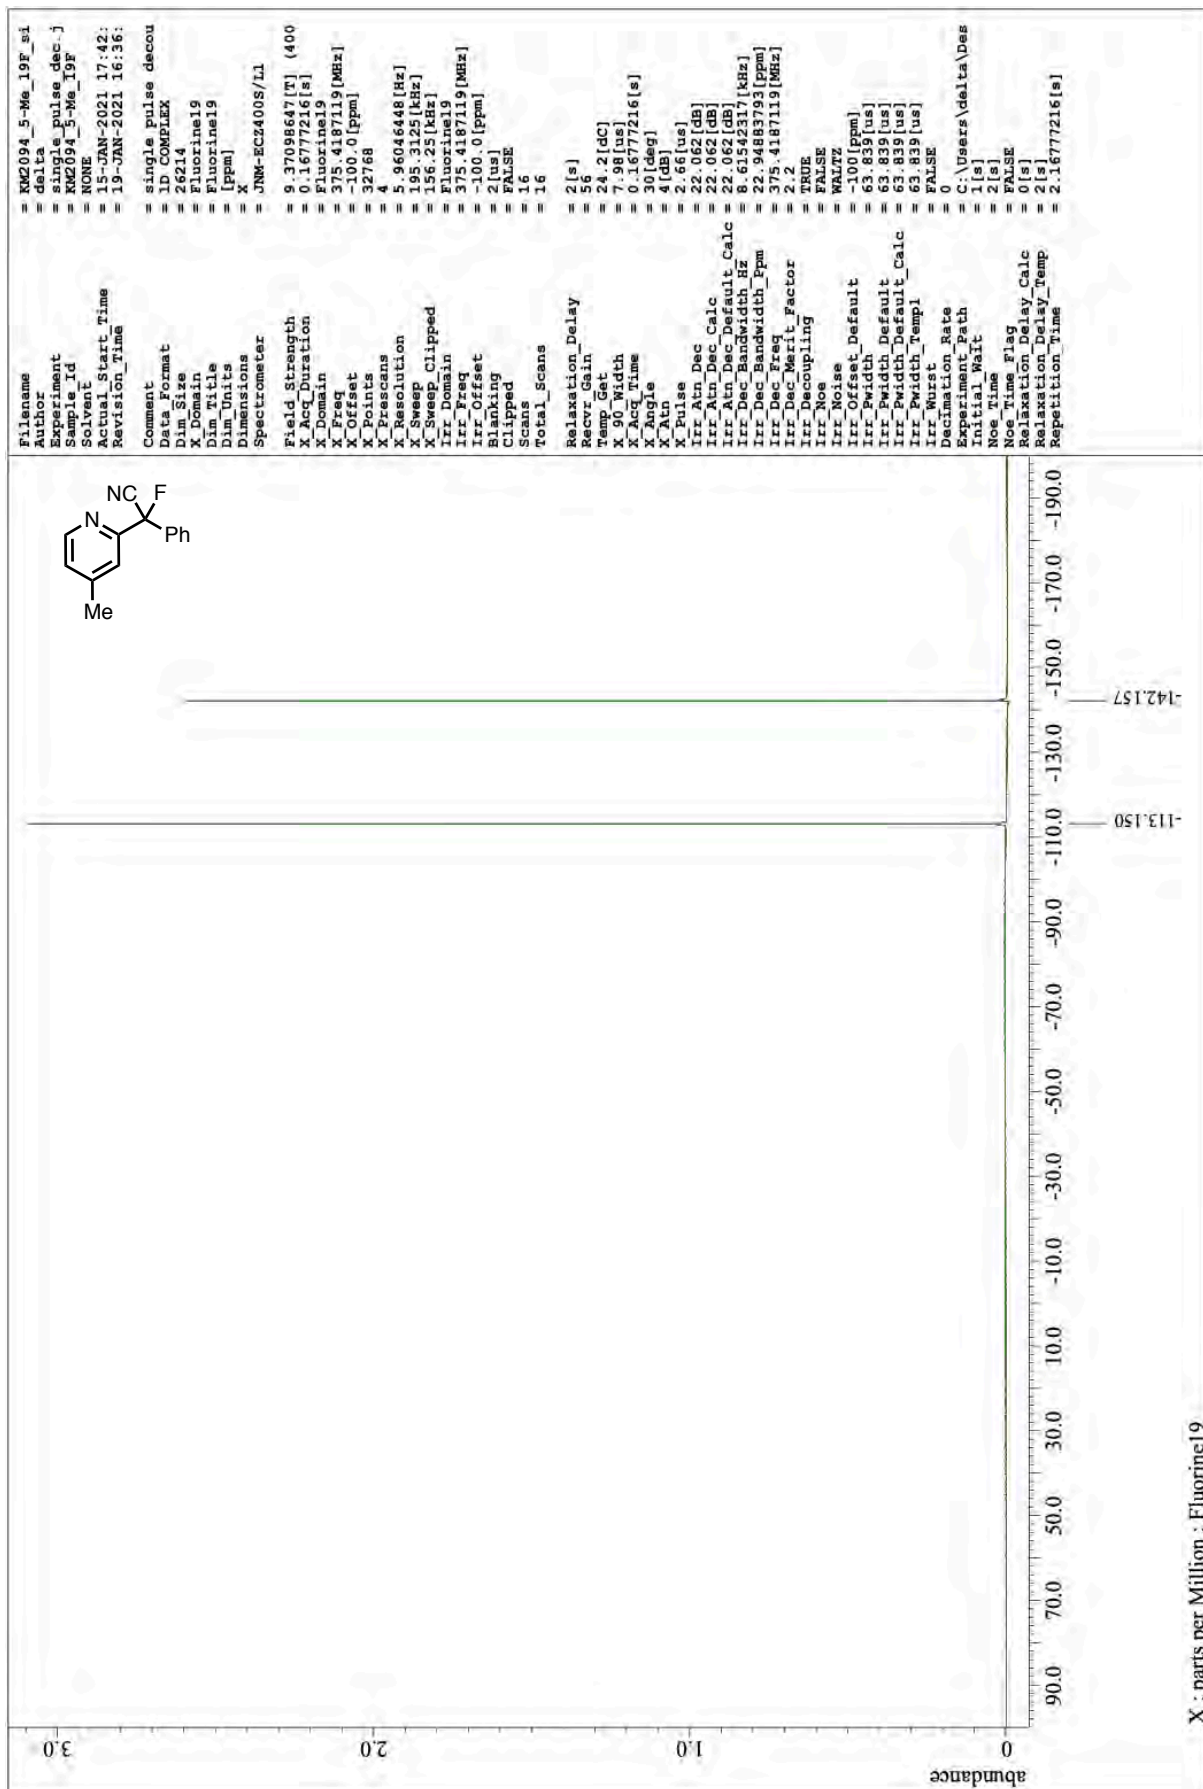

<sup>1</sup>H NMR of 2AF (400 MHz, CDCl<sub>3</sub>)

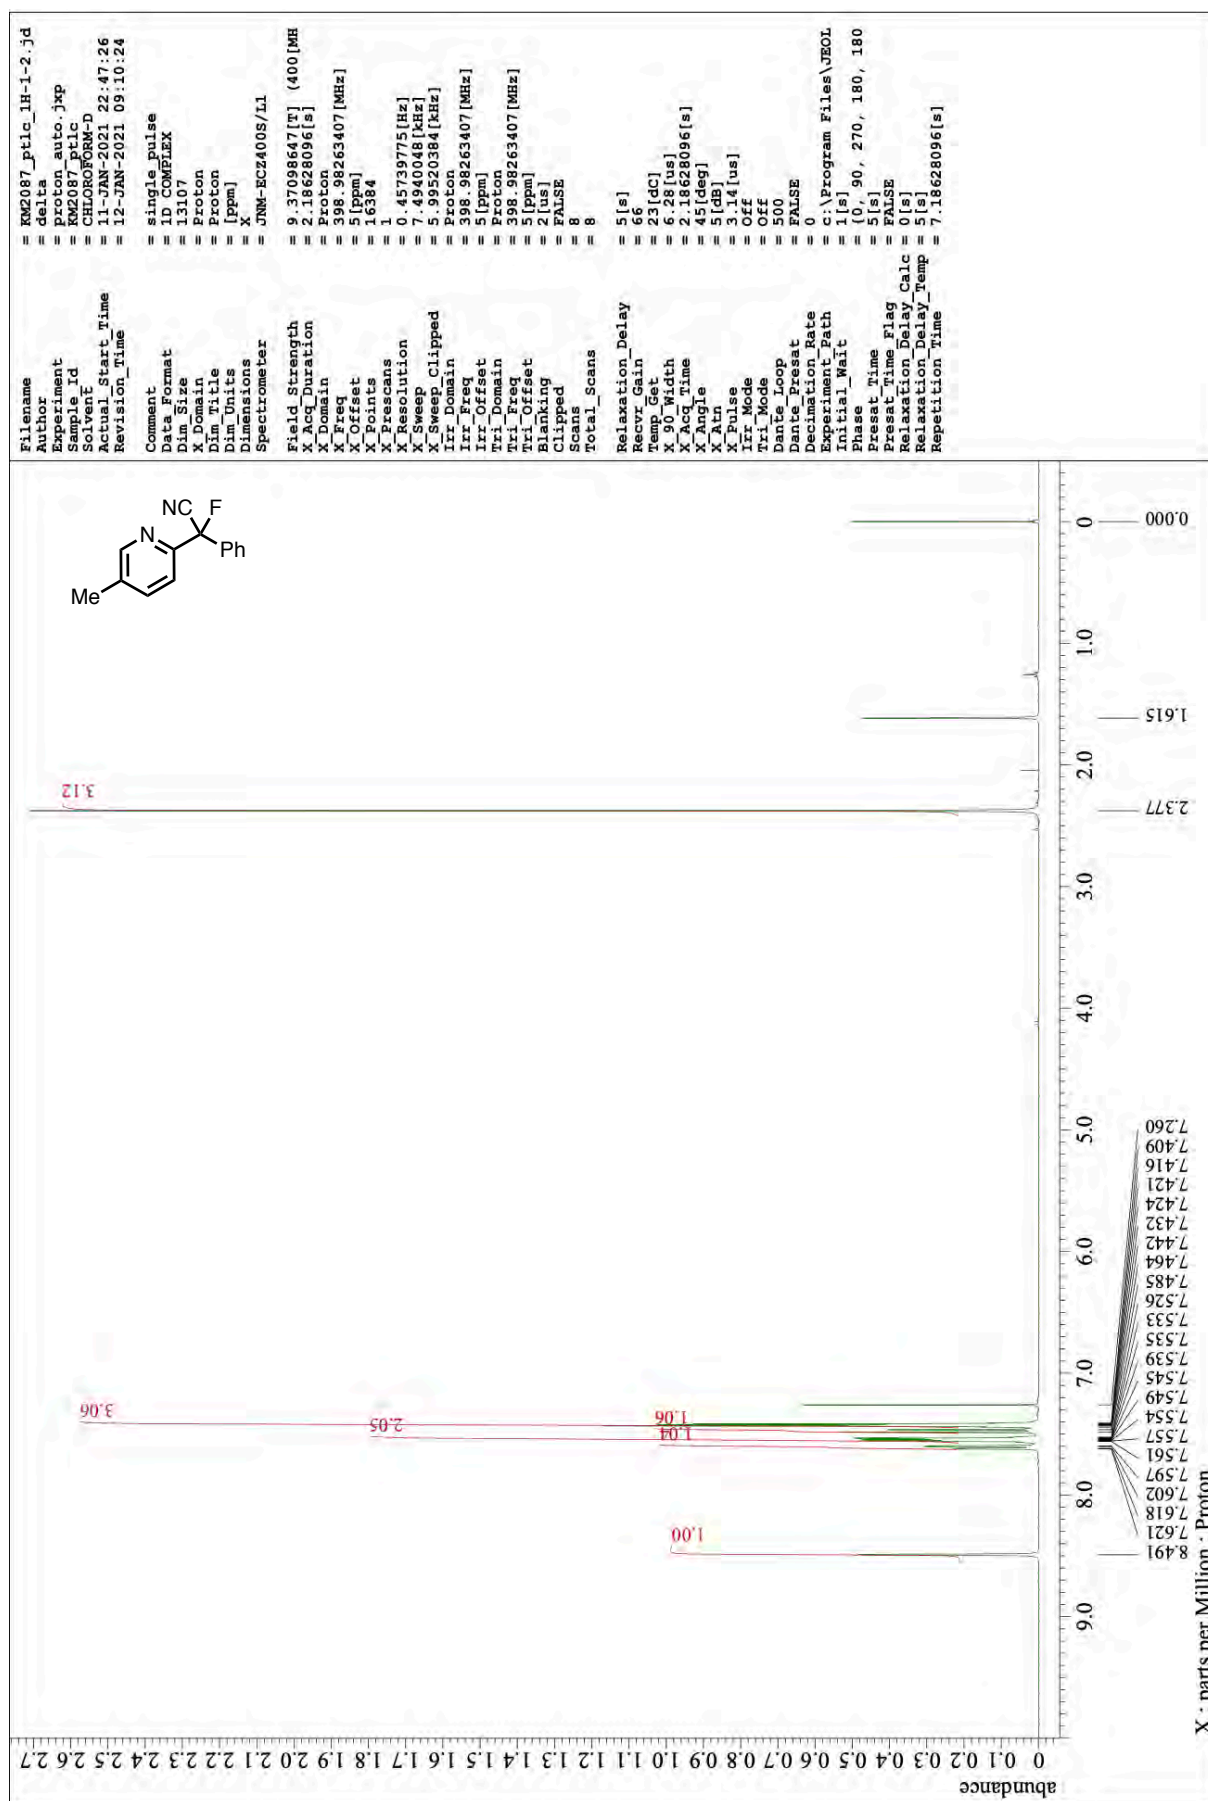

<sup>13</sup>C NMR of 2AF (101 MHz, CDCl<sub>3</sub>)

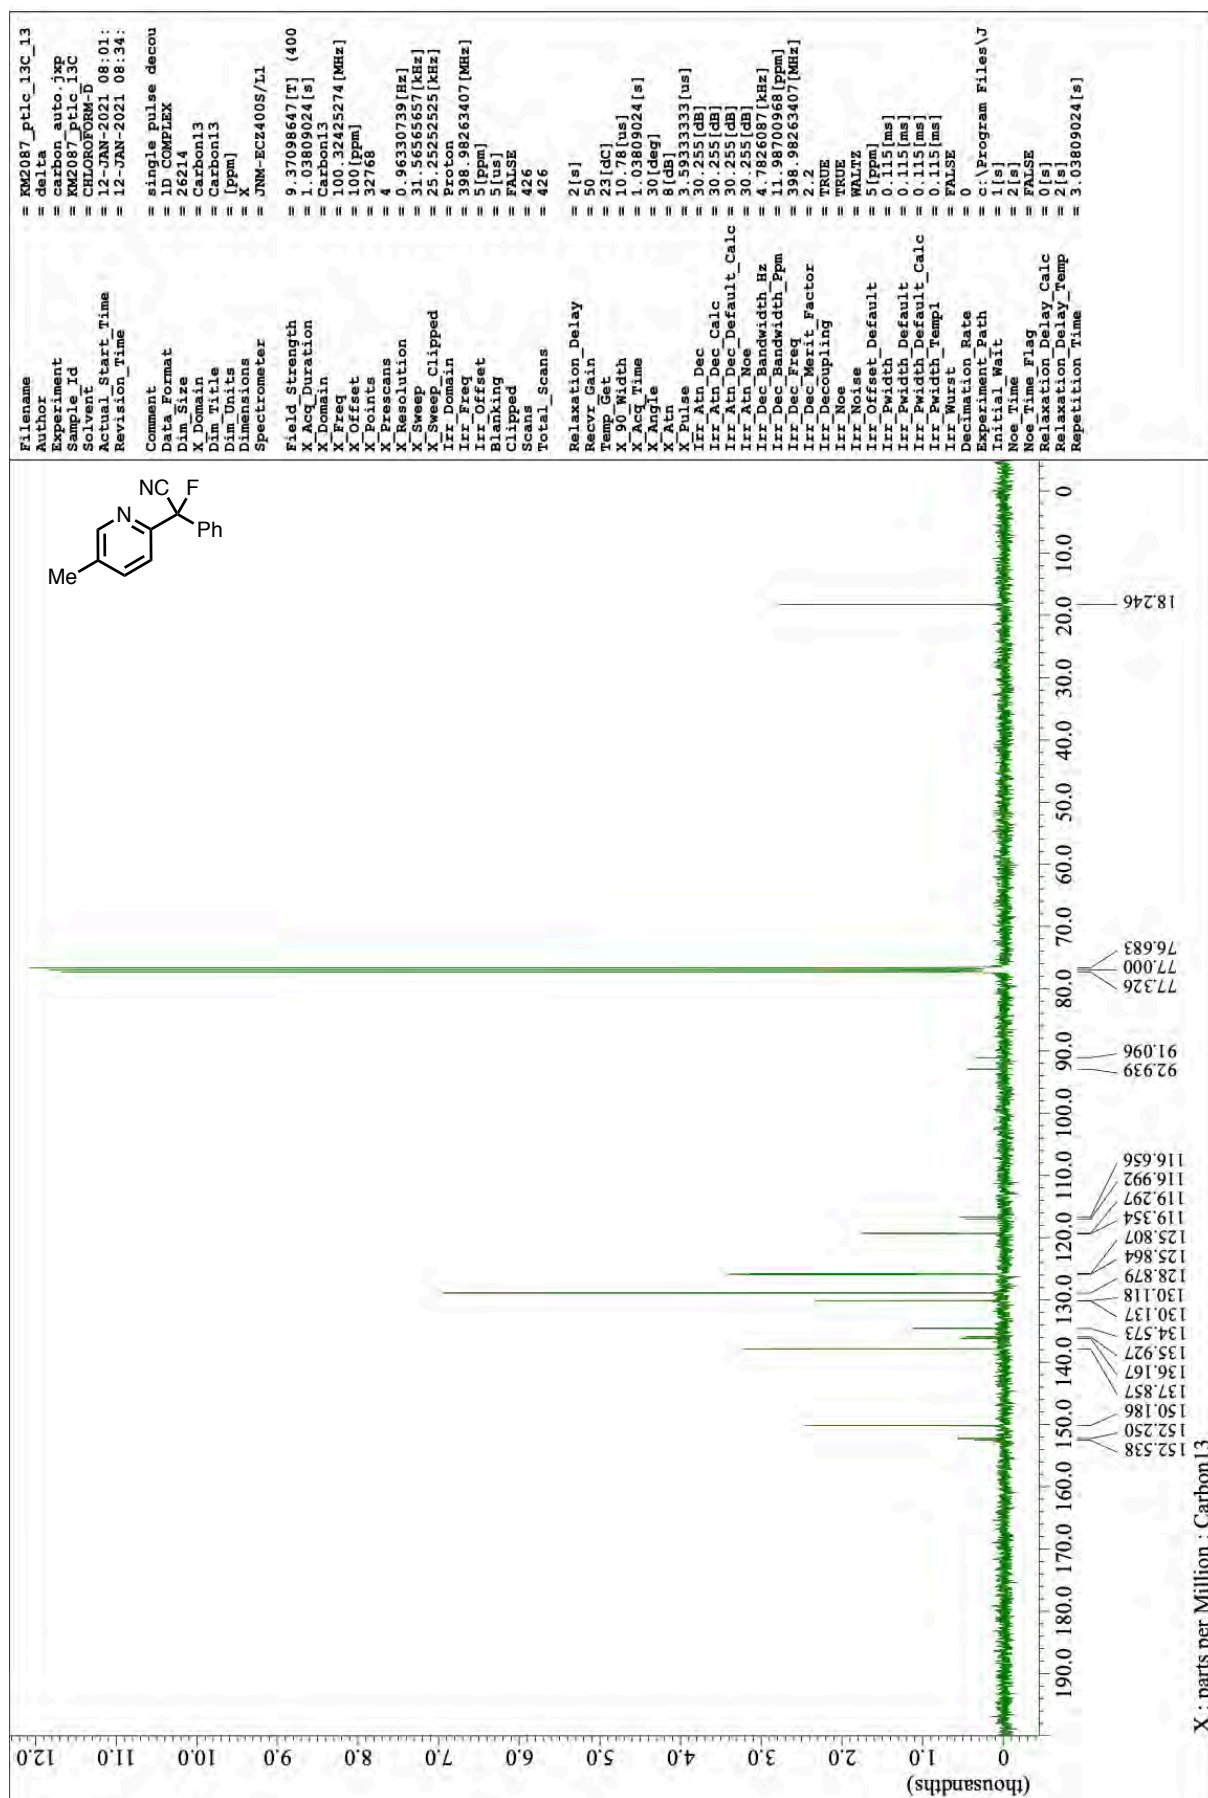



<sup>19</sup>F NMR of 2AF (376 MHz, CDCl<sub>3</sub>)

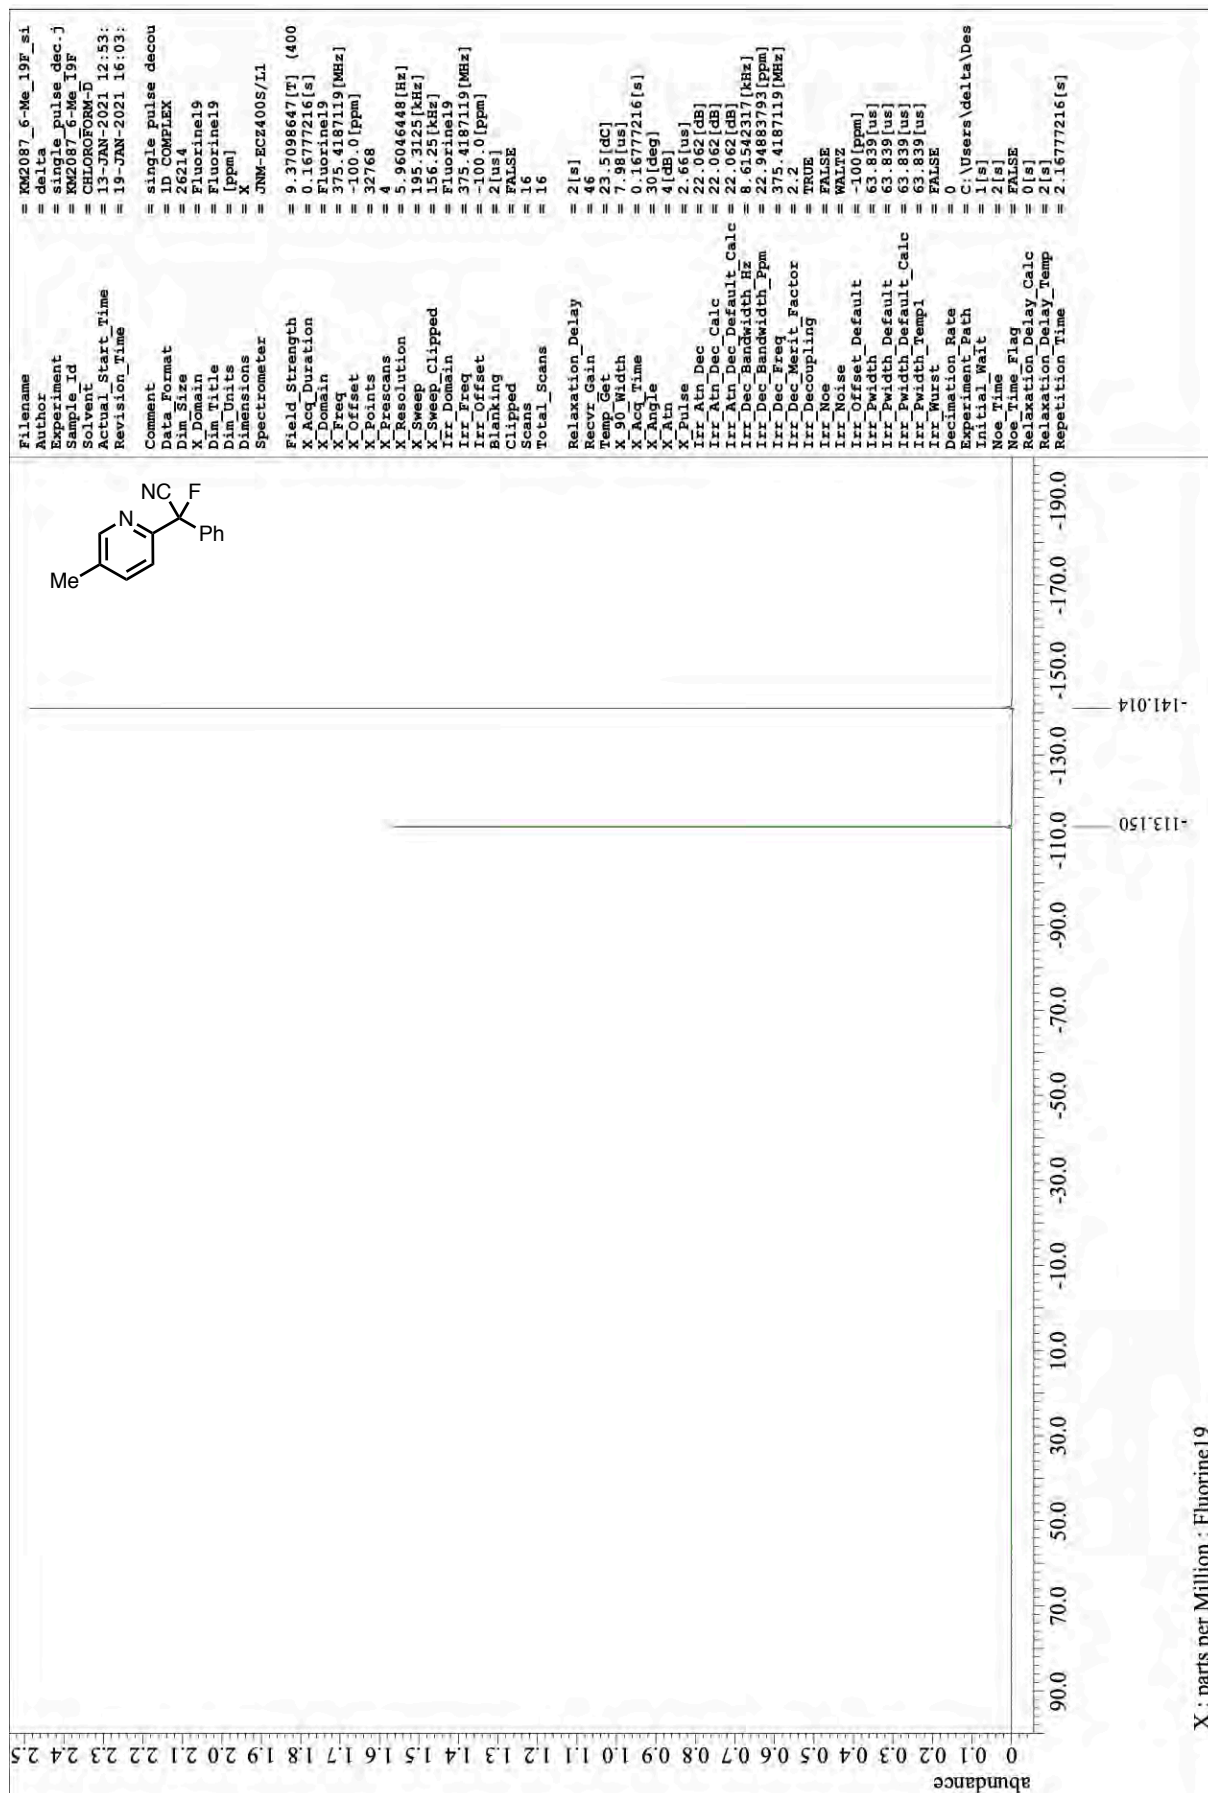

<sup>1</sup>H NMR of 2AG (400 MHz, CDCl<sub>3</sub>)

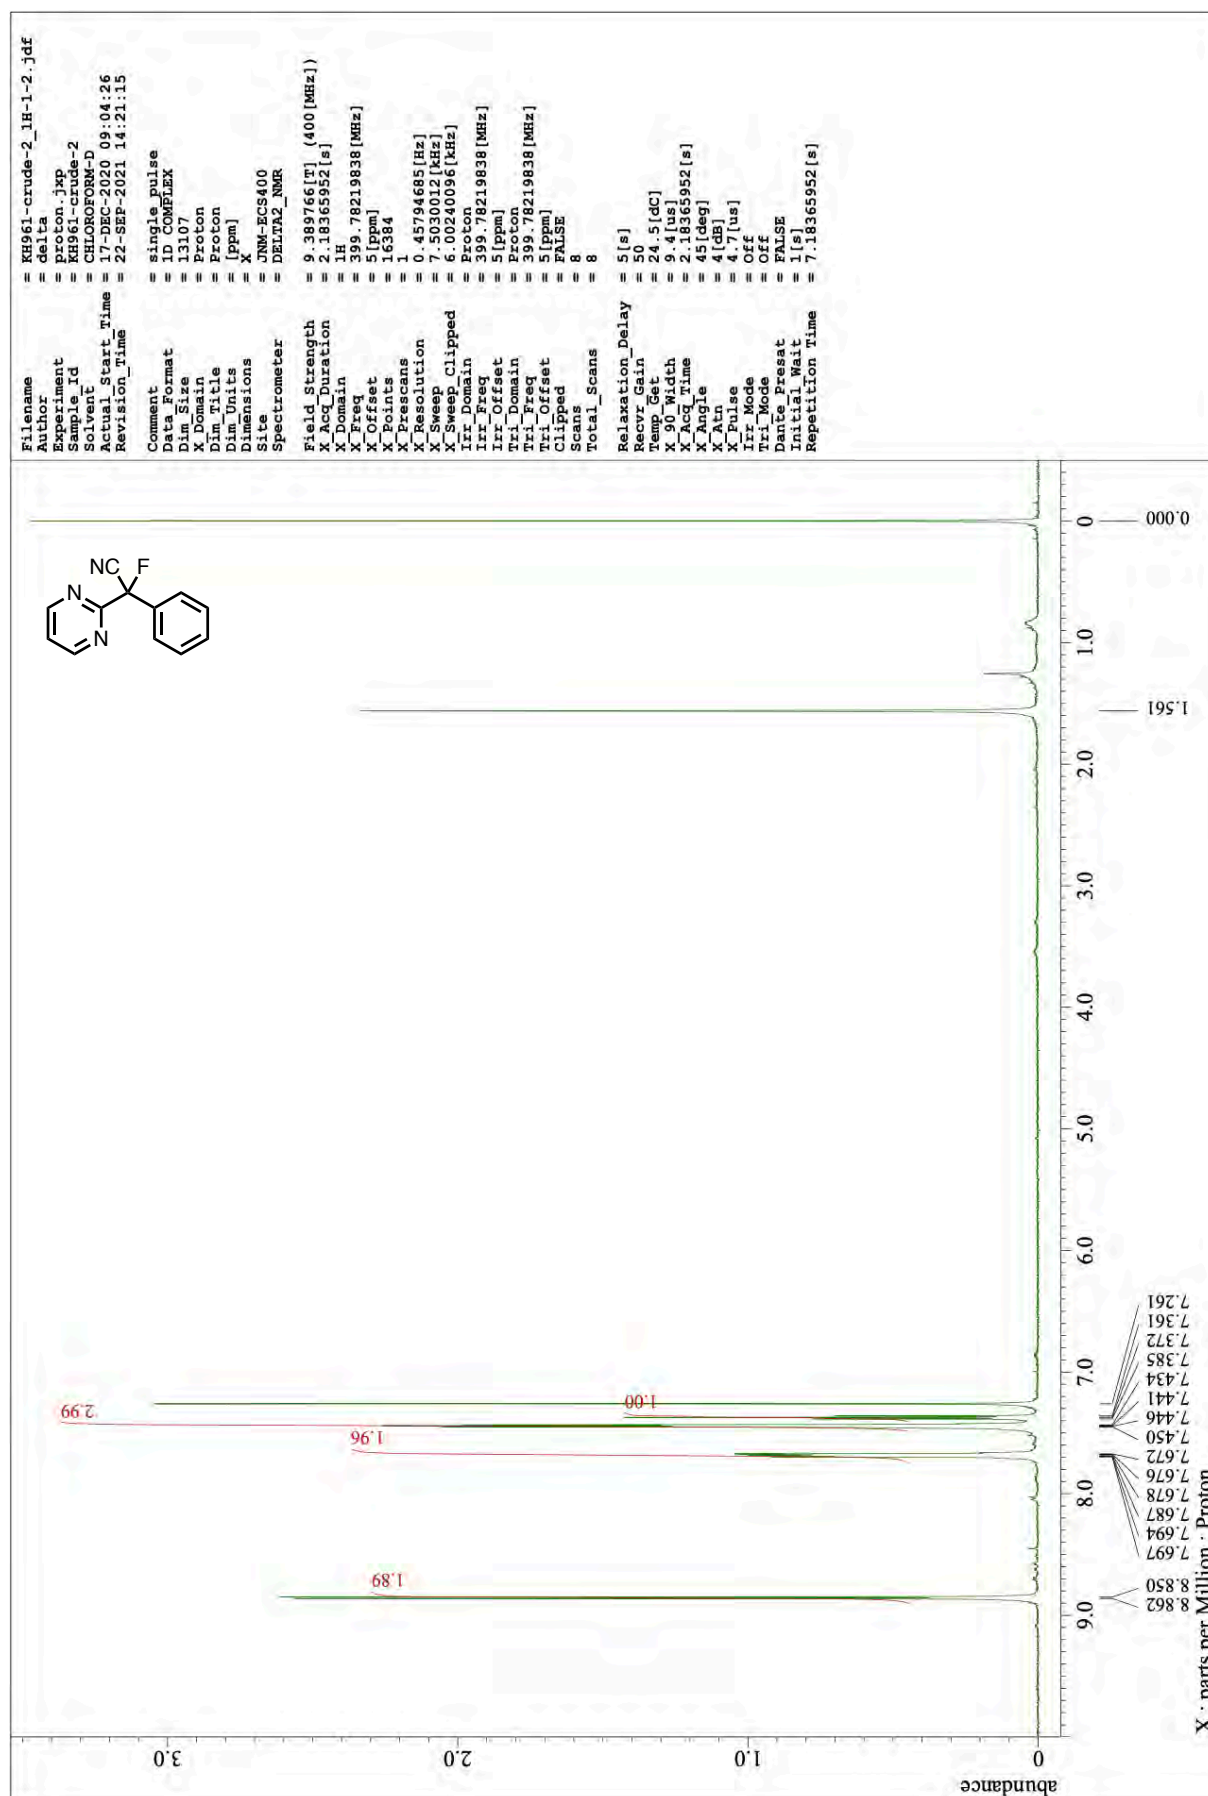

<sup>13</sup>C NMR of 2AG (101 MHz, CDCl<sub>3</sub>)

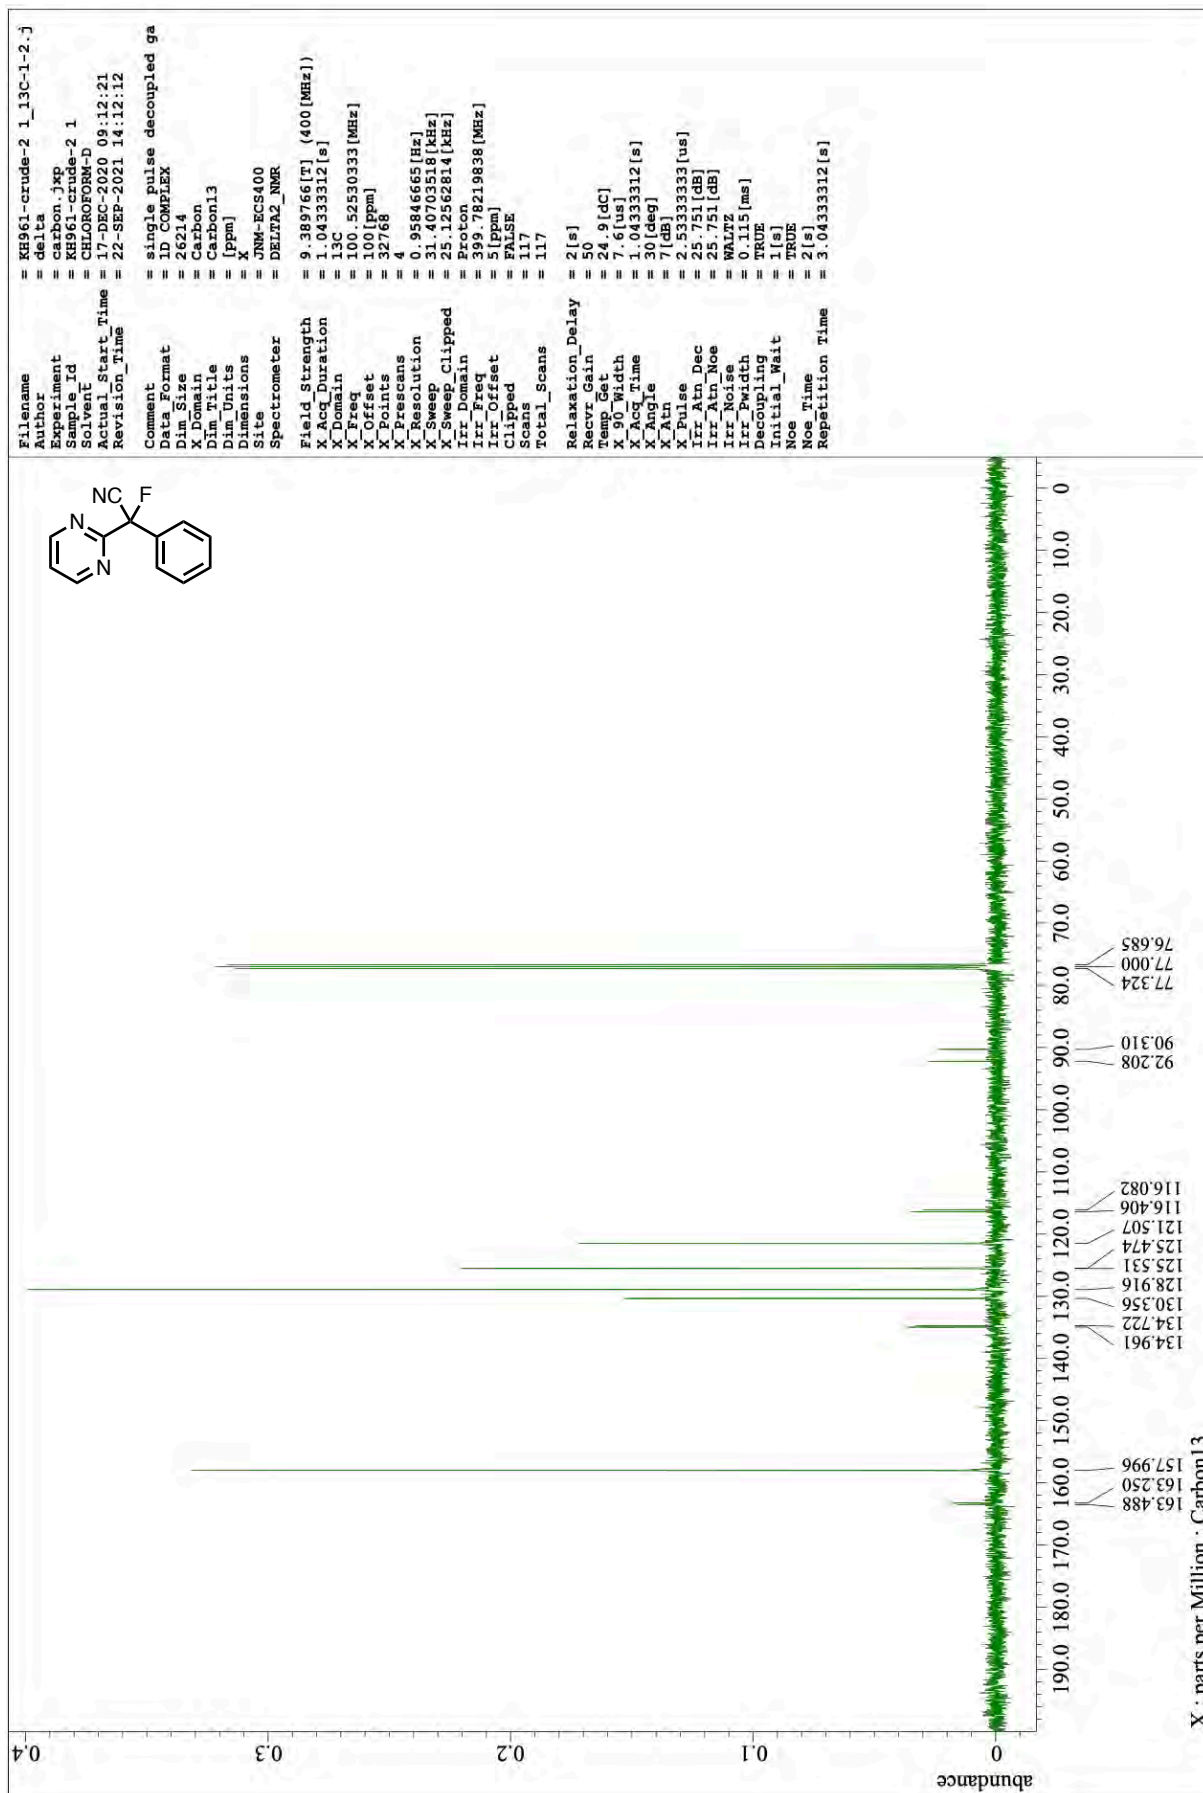

<sup>19</sup>F NMR of 2AG (376 MHz, CDCl<sub>3</sub>)

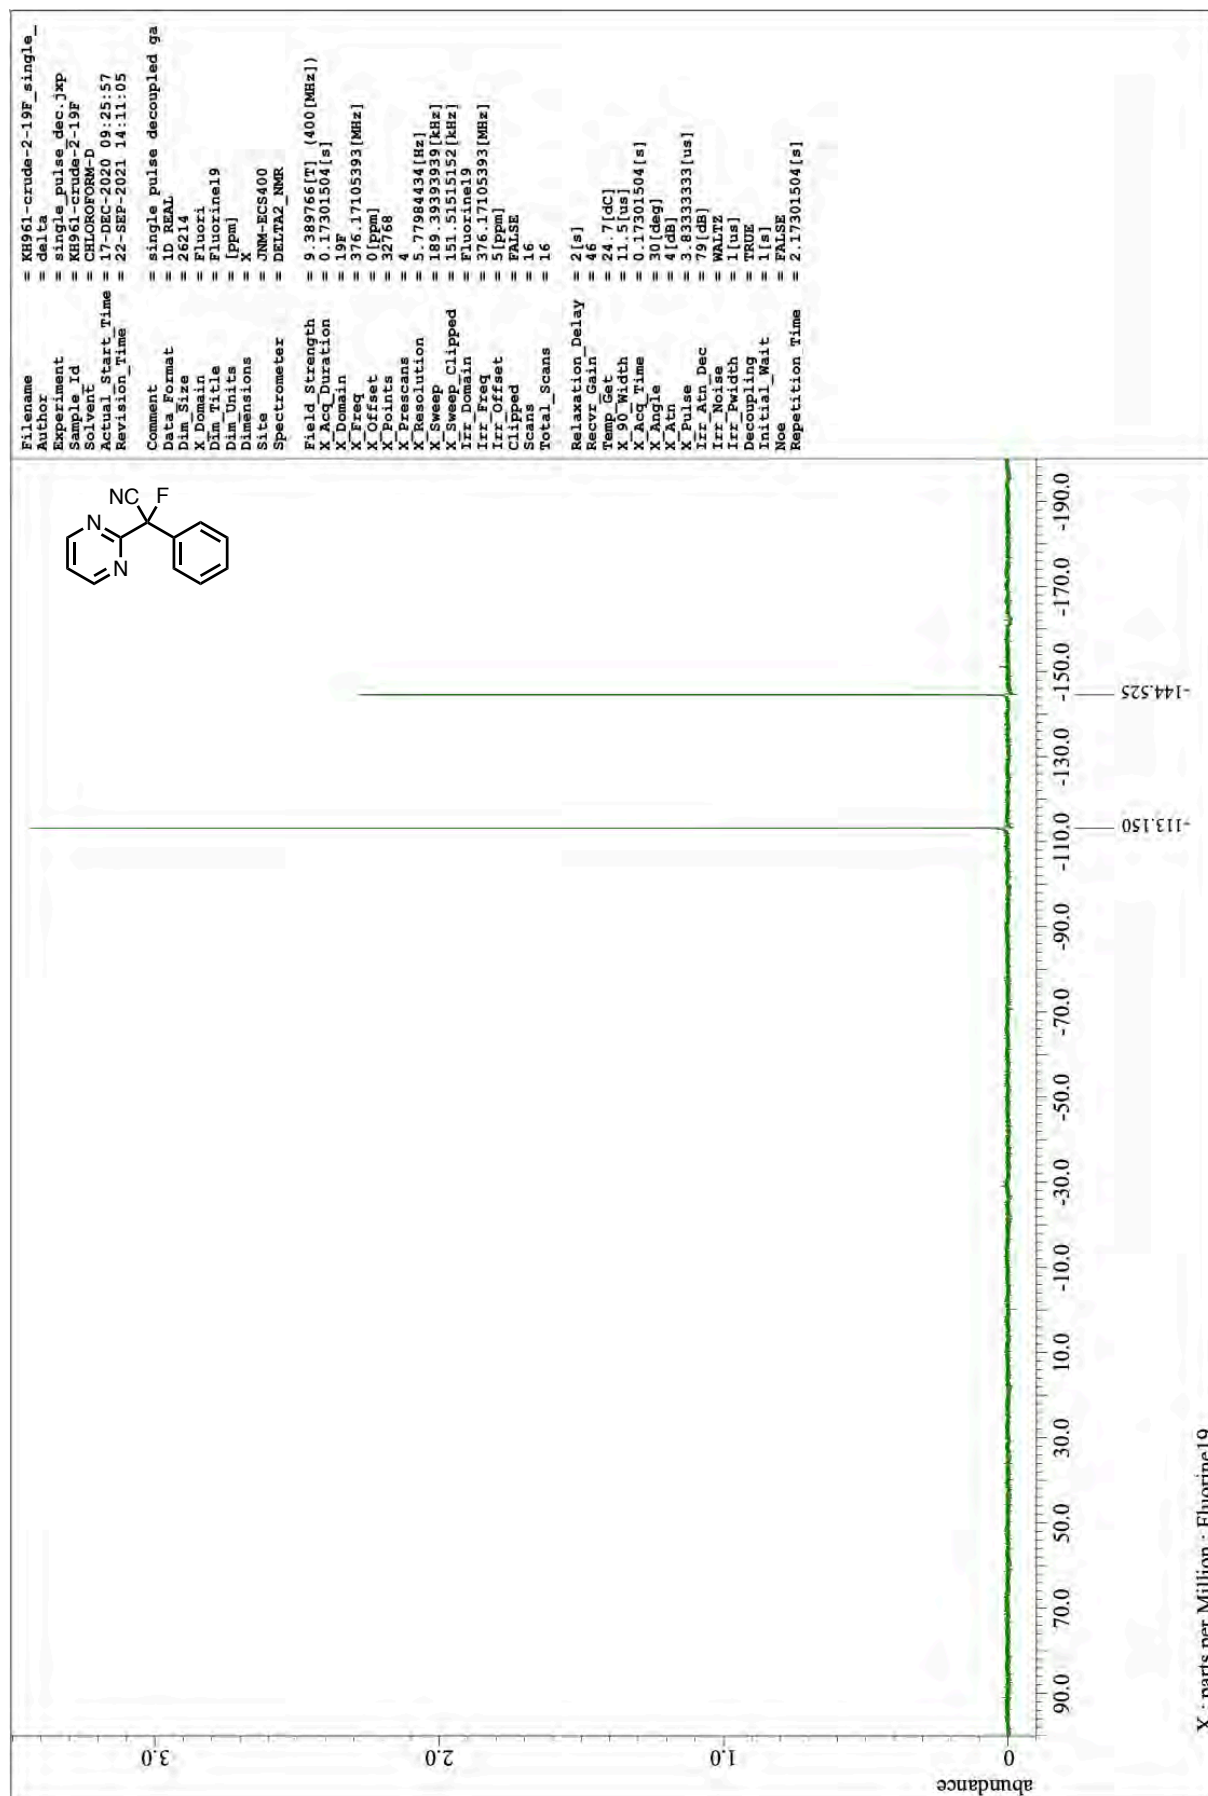

<sup>1</sup>H NMR of 2AH (400 MHz, CDCl<sub>3</sub>)

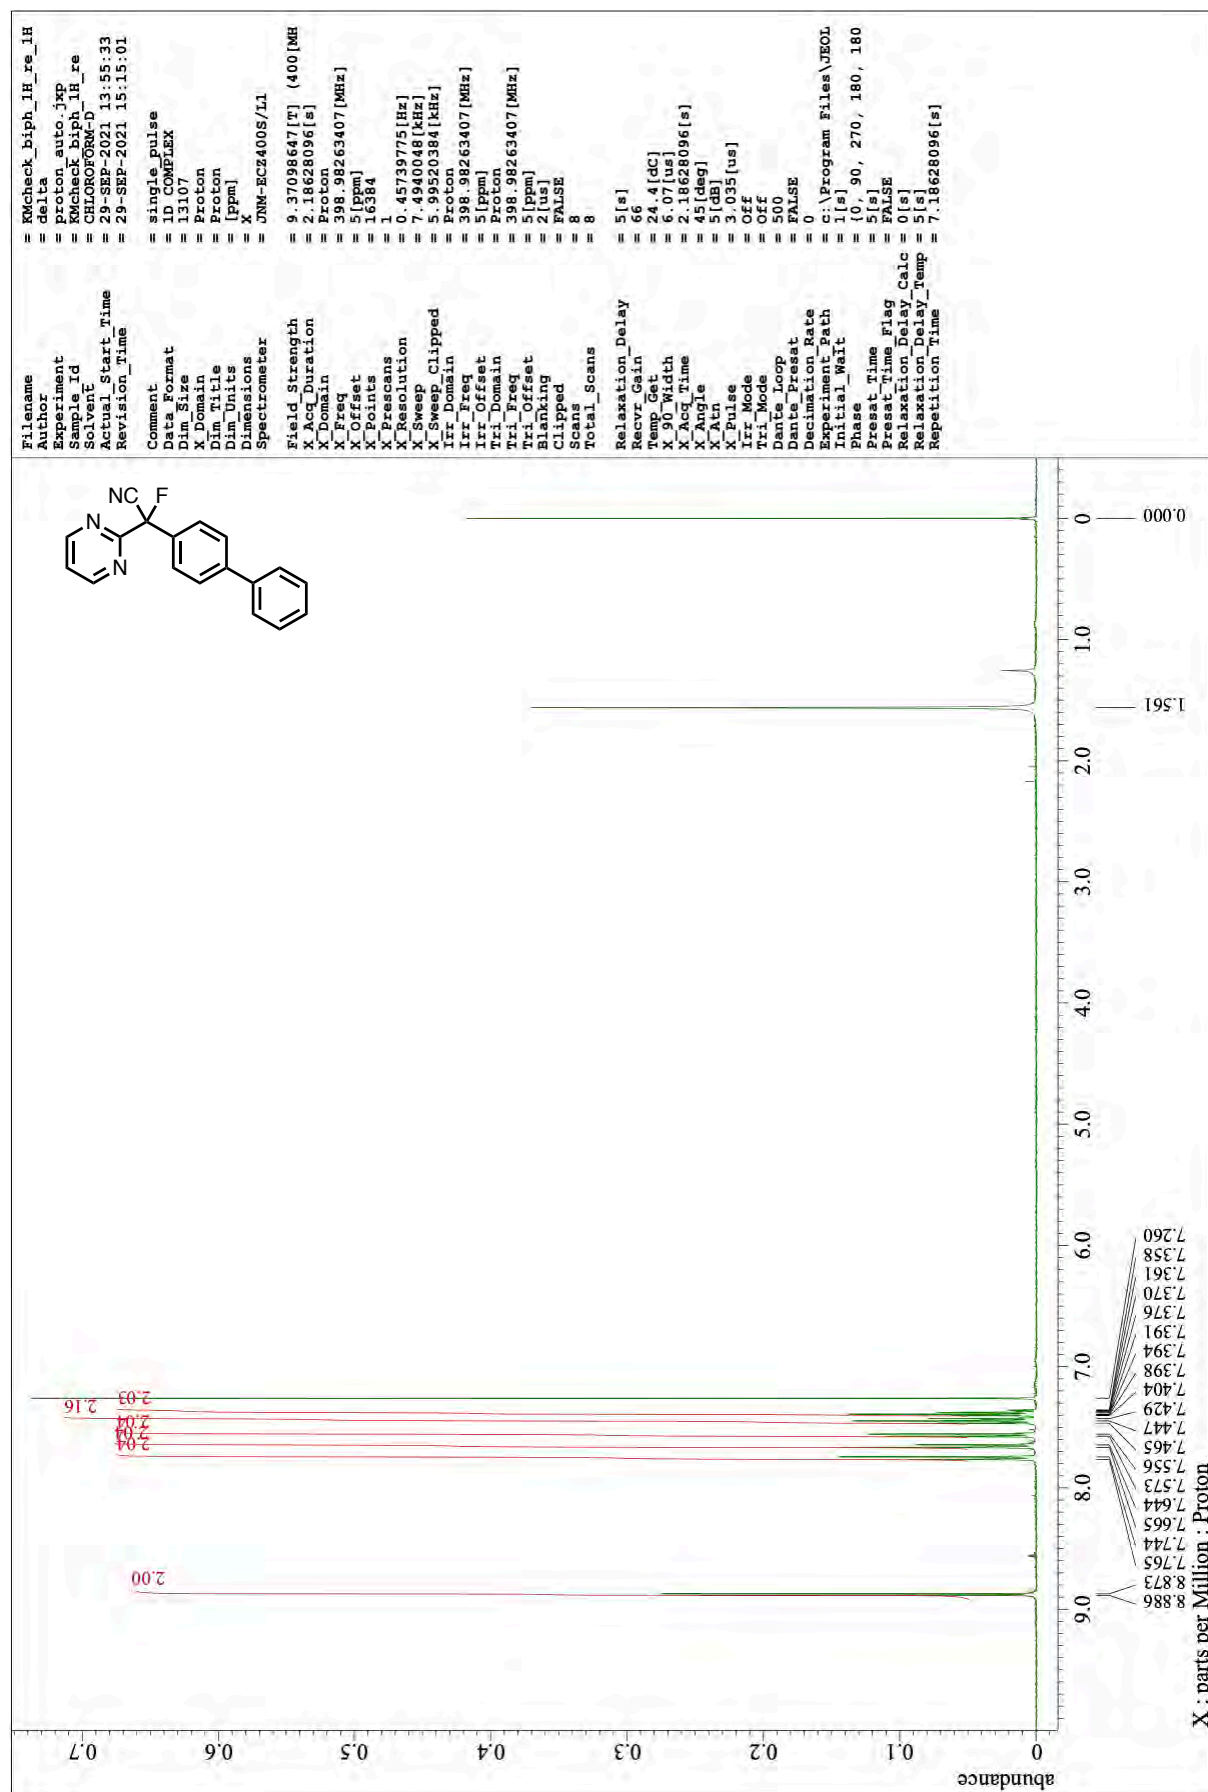

<sup>13</sup>C NMR of 2AH (101 MHz, CDCl<sub>3</sub>)

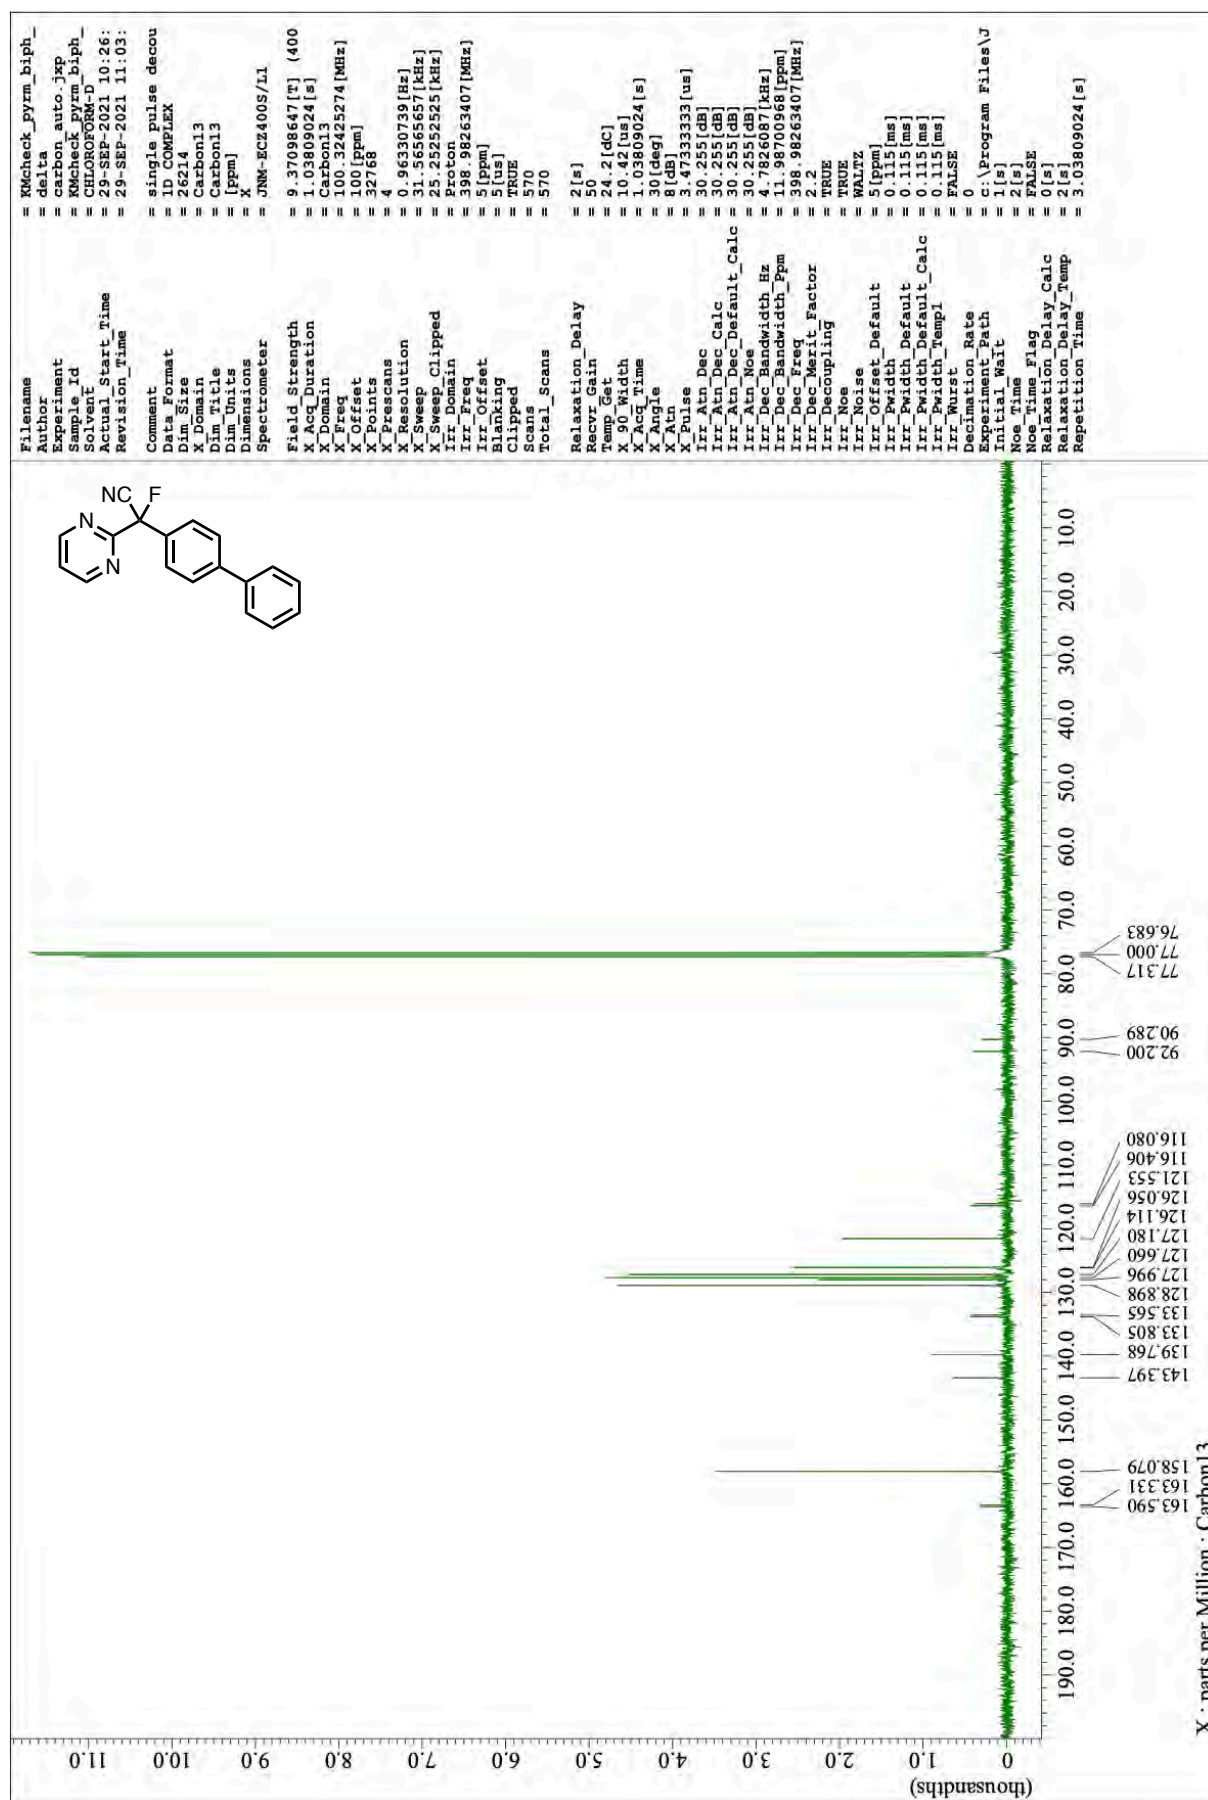

<sup>19</sup>F NMR of 2AH (376 MHz, CDCl<sub>3</sub>)

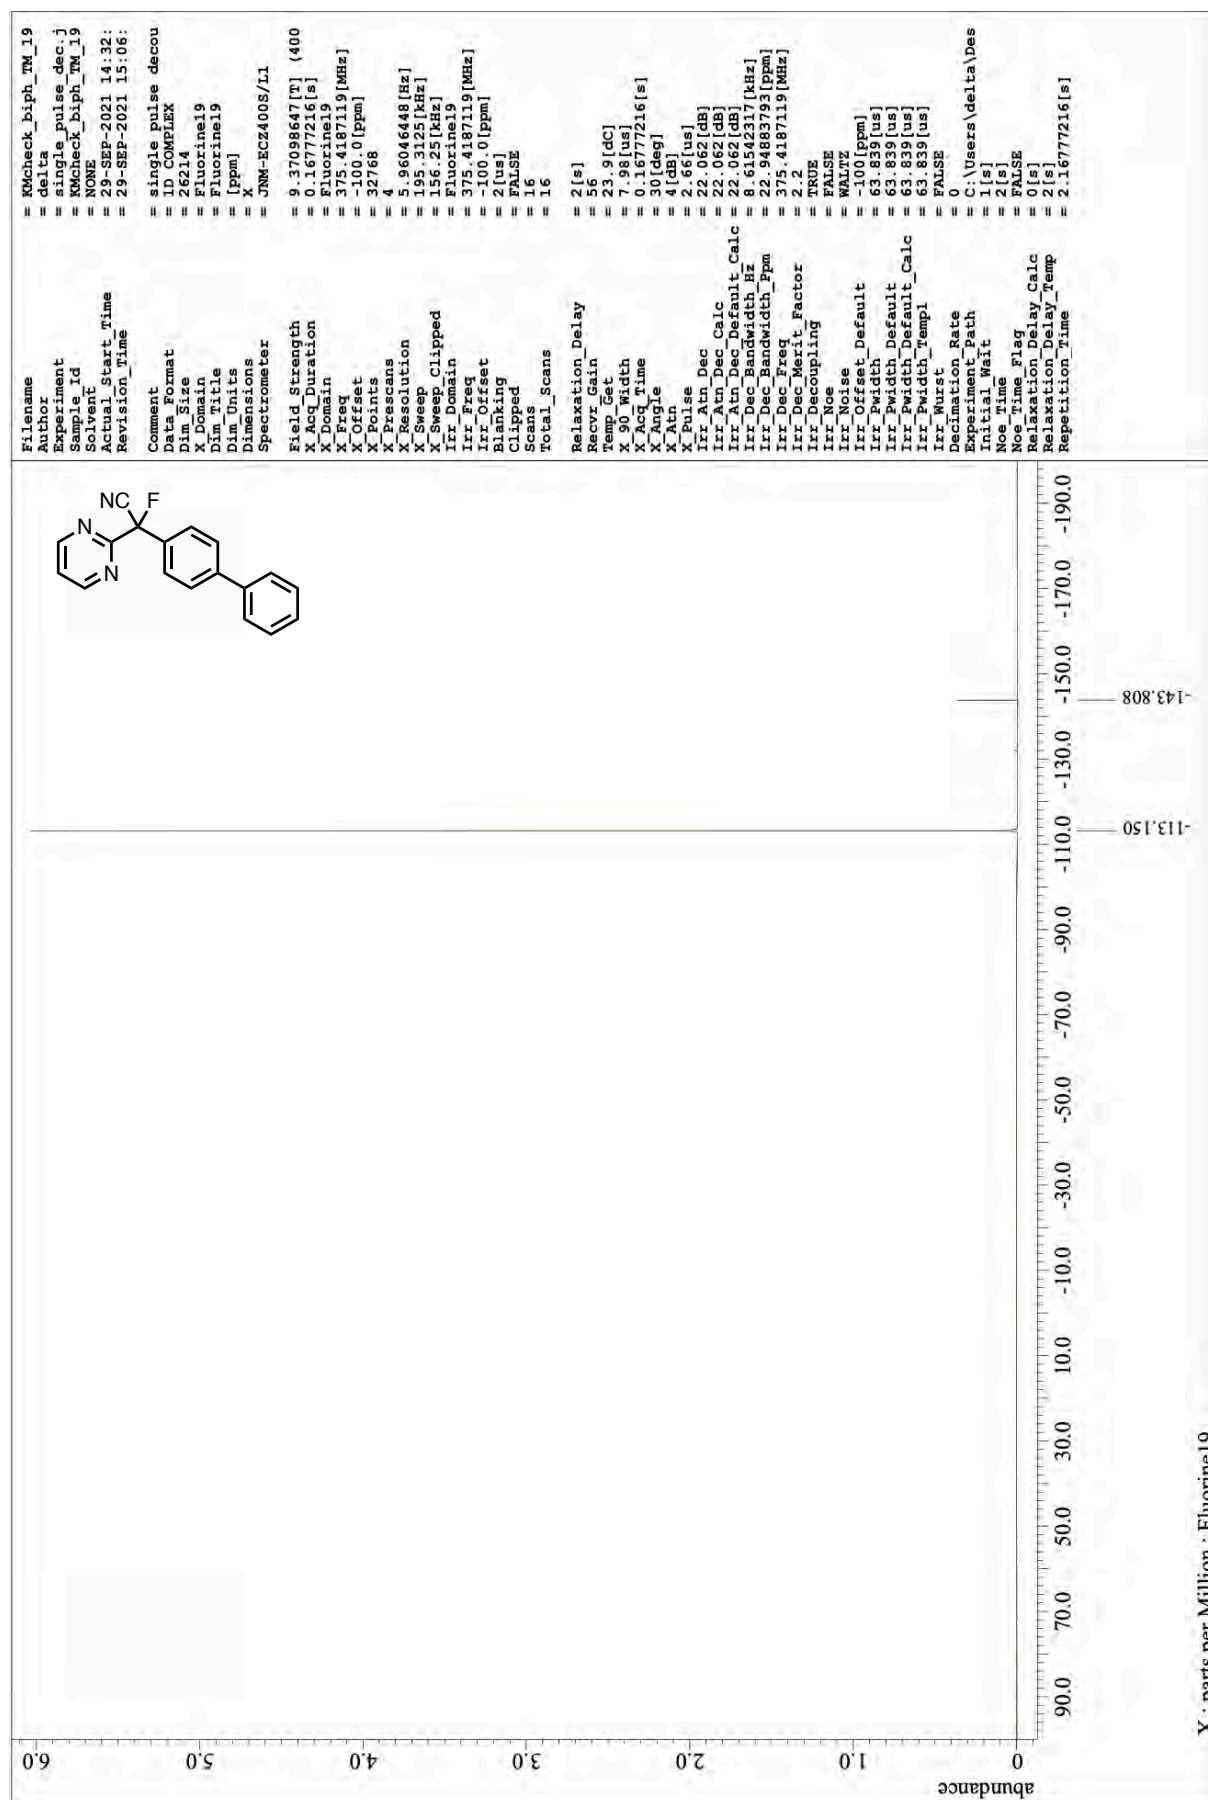

<sup>1</sup>H NMR of 2AI (400 MHz, CDCl<sub>3</sub>)

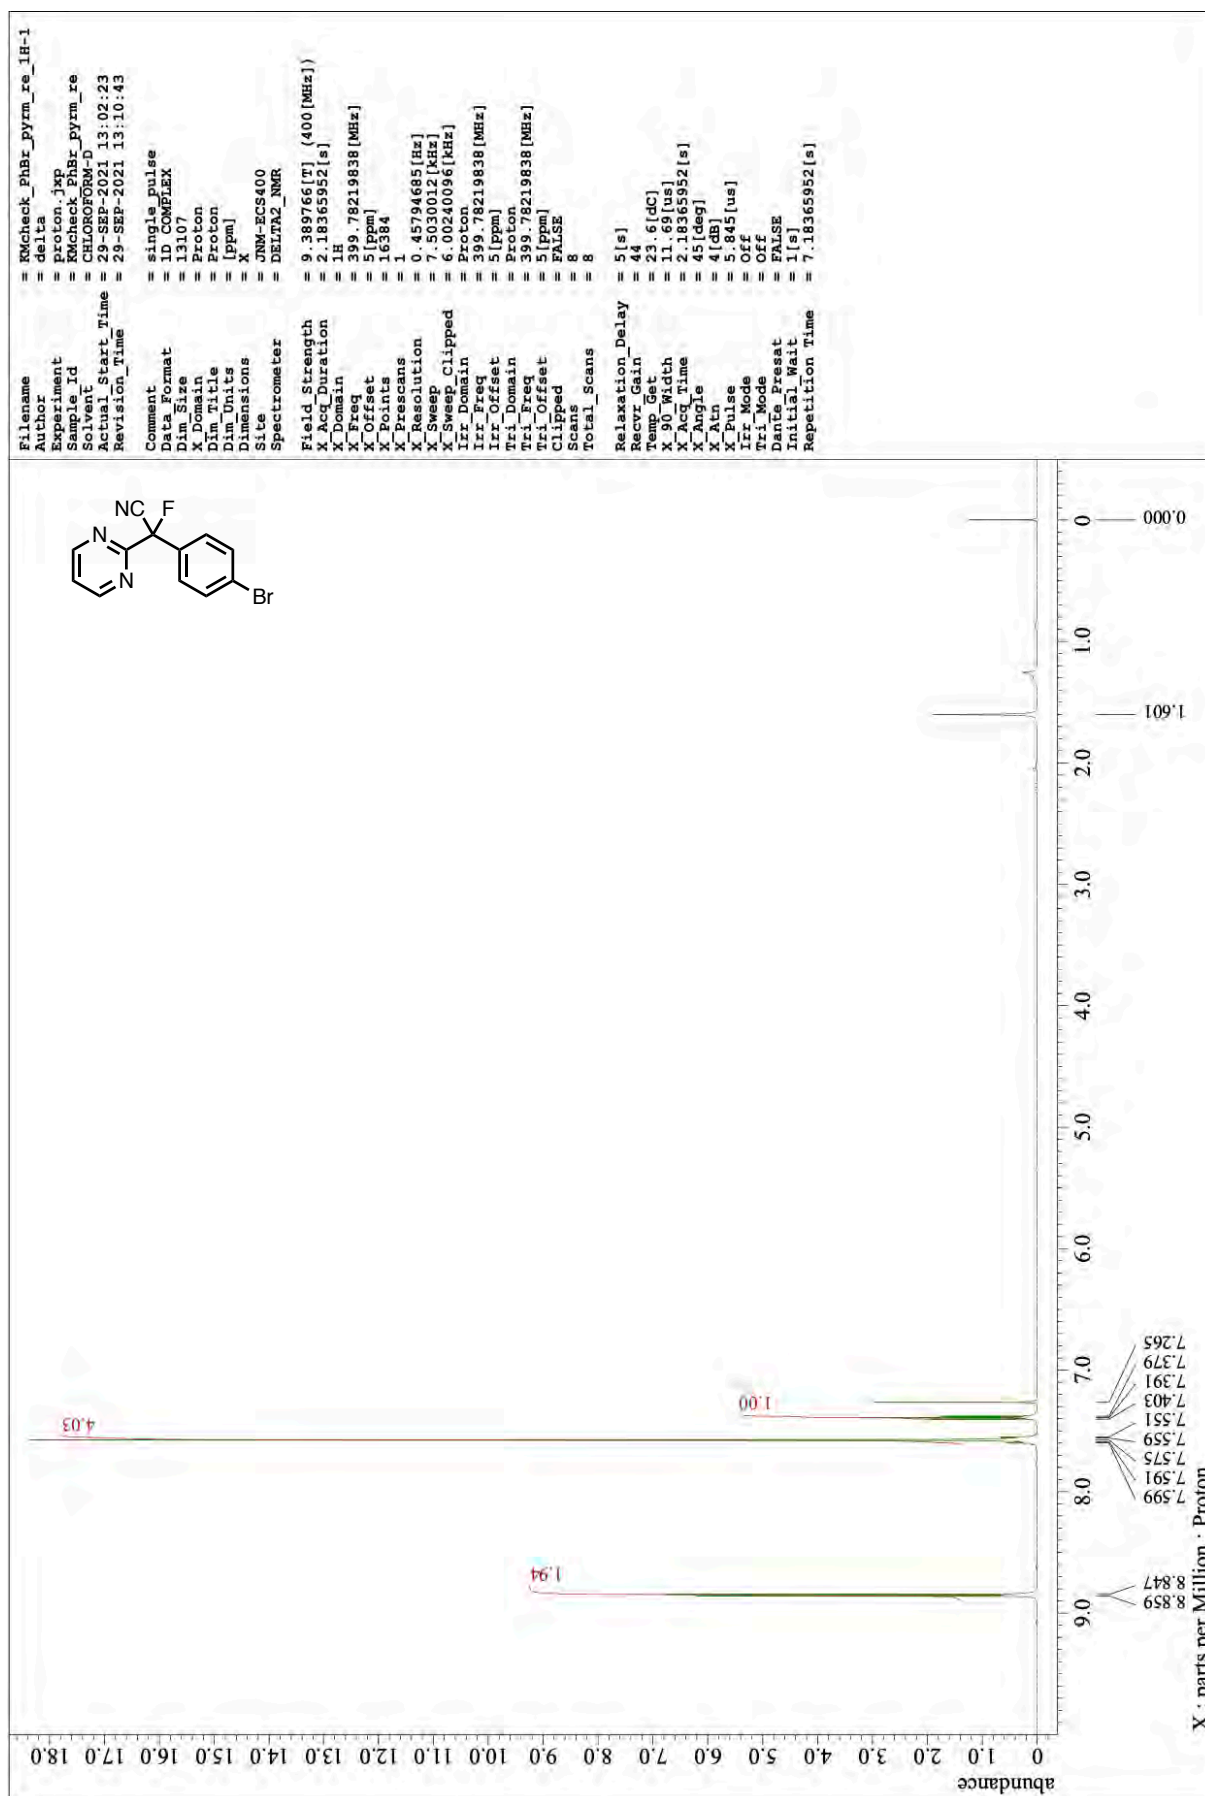



<sup>13</sup>C NMR of 2AI (101 MHz, CDCl<sub>3</sub>)

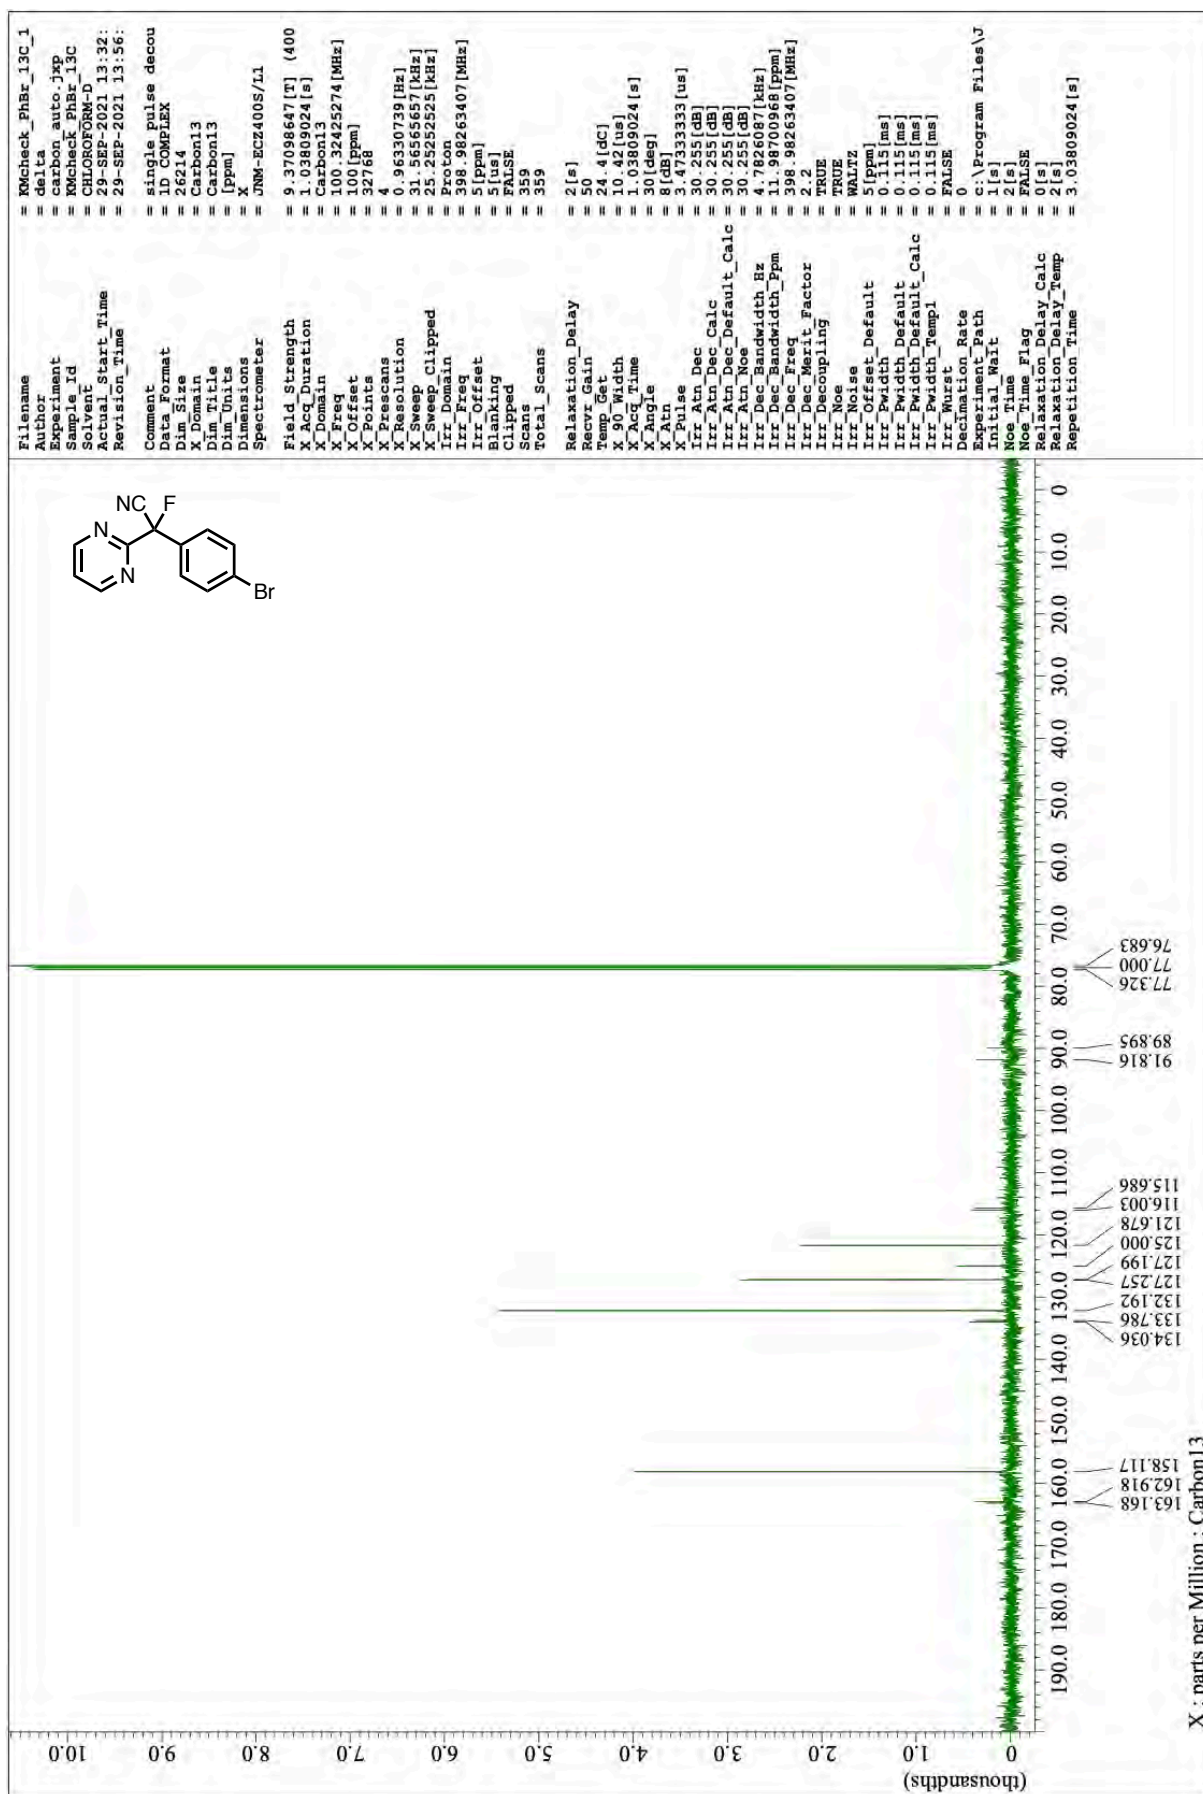

<sup>19</sup>F NMR of 2AI (376 MHz, CDCl<sub>3</sub>)

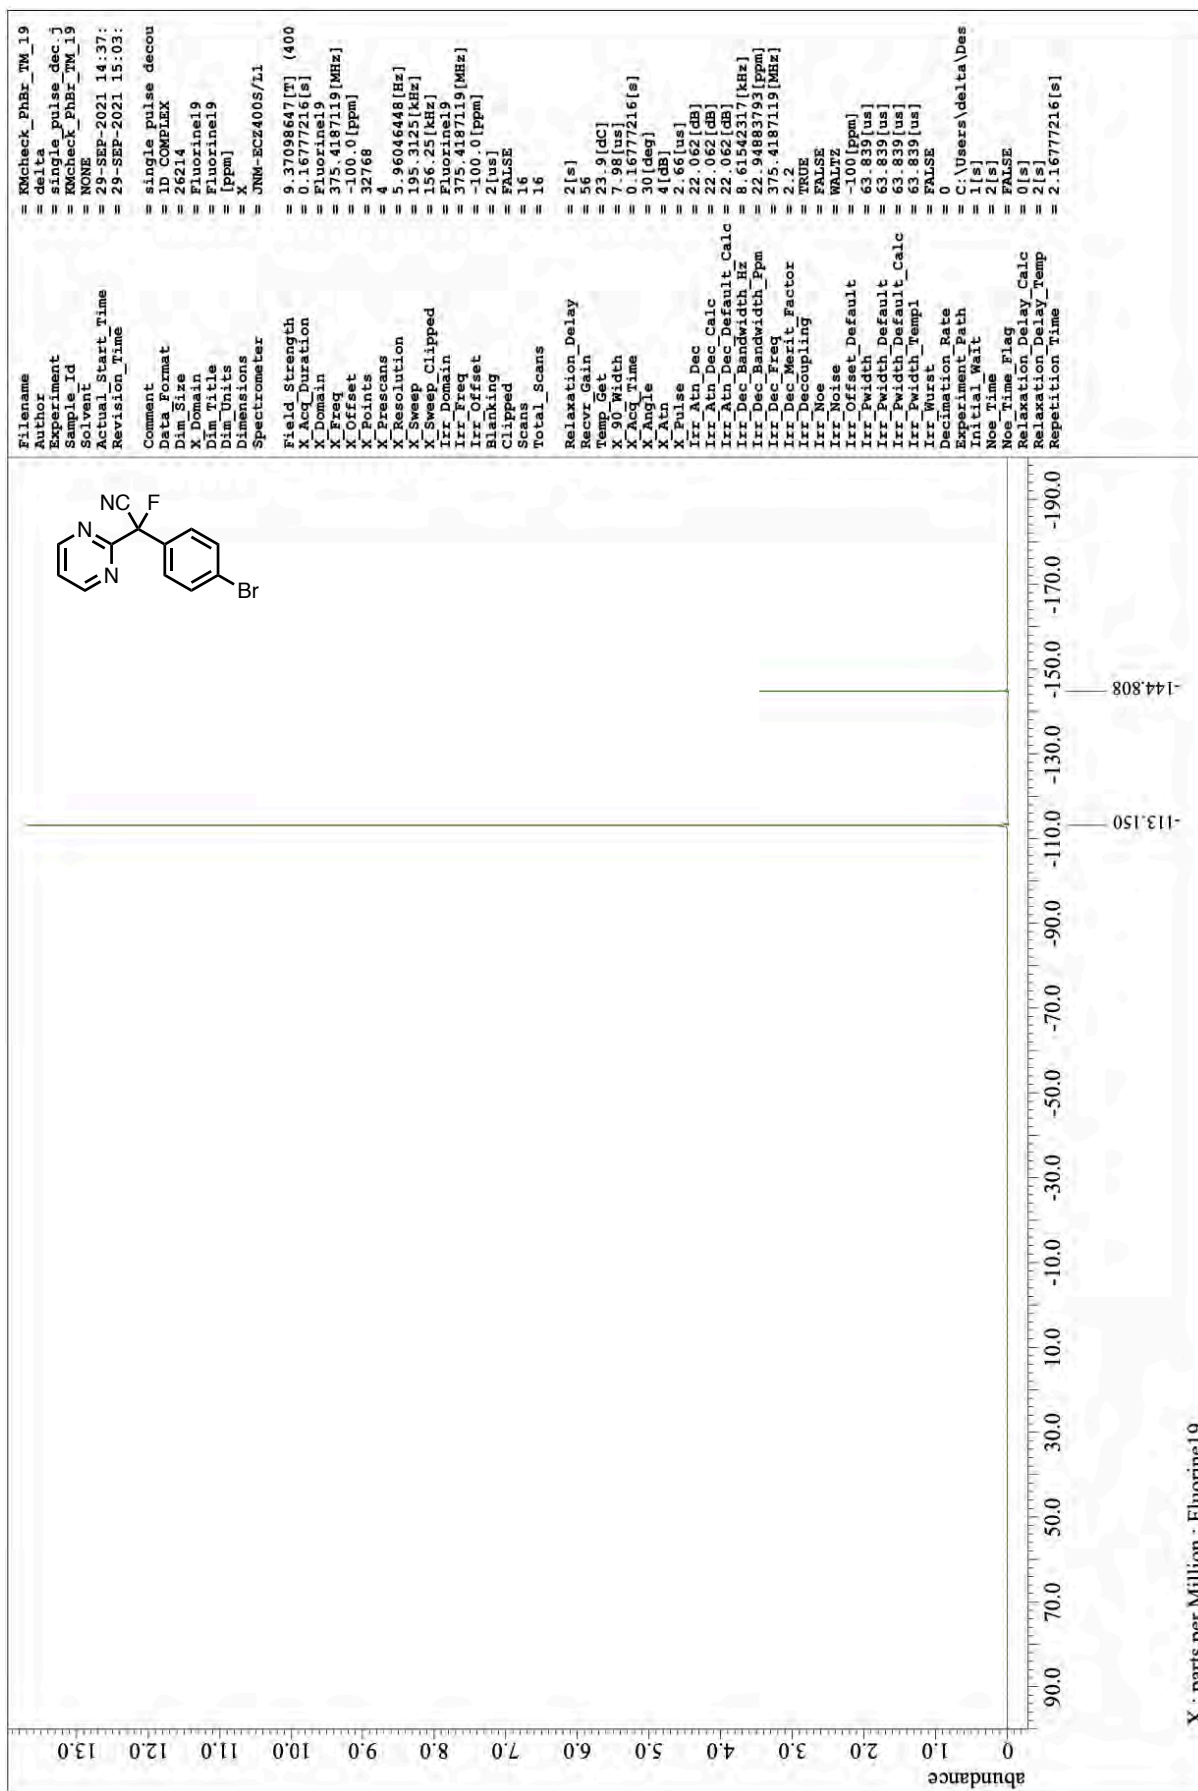

<sup>1</sup>H NMR of 2AJ (400 MHz, CDCl<sub>3</sub>)

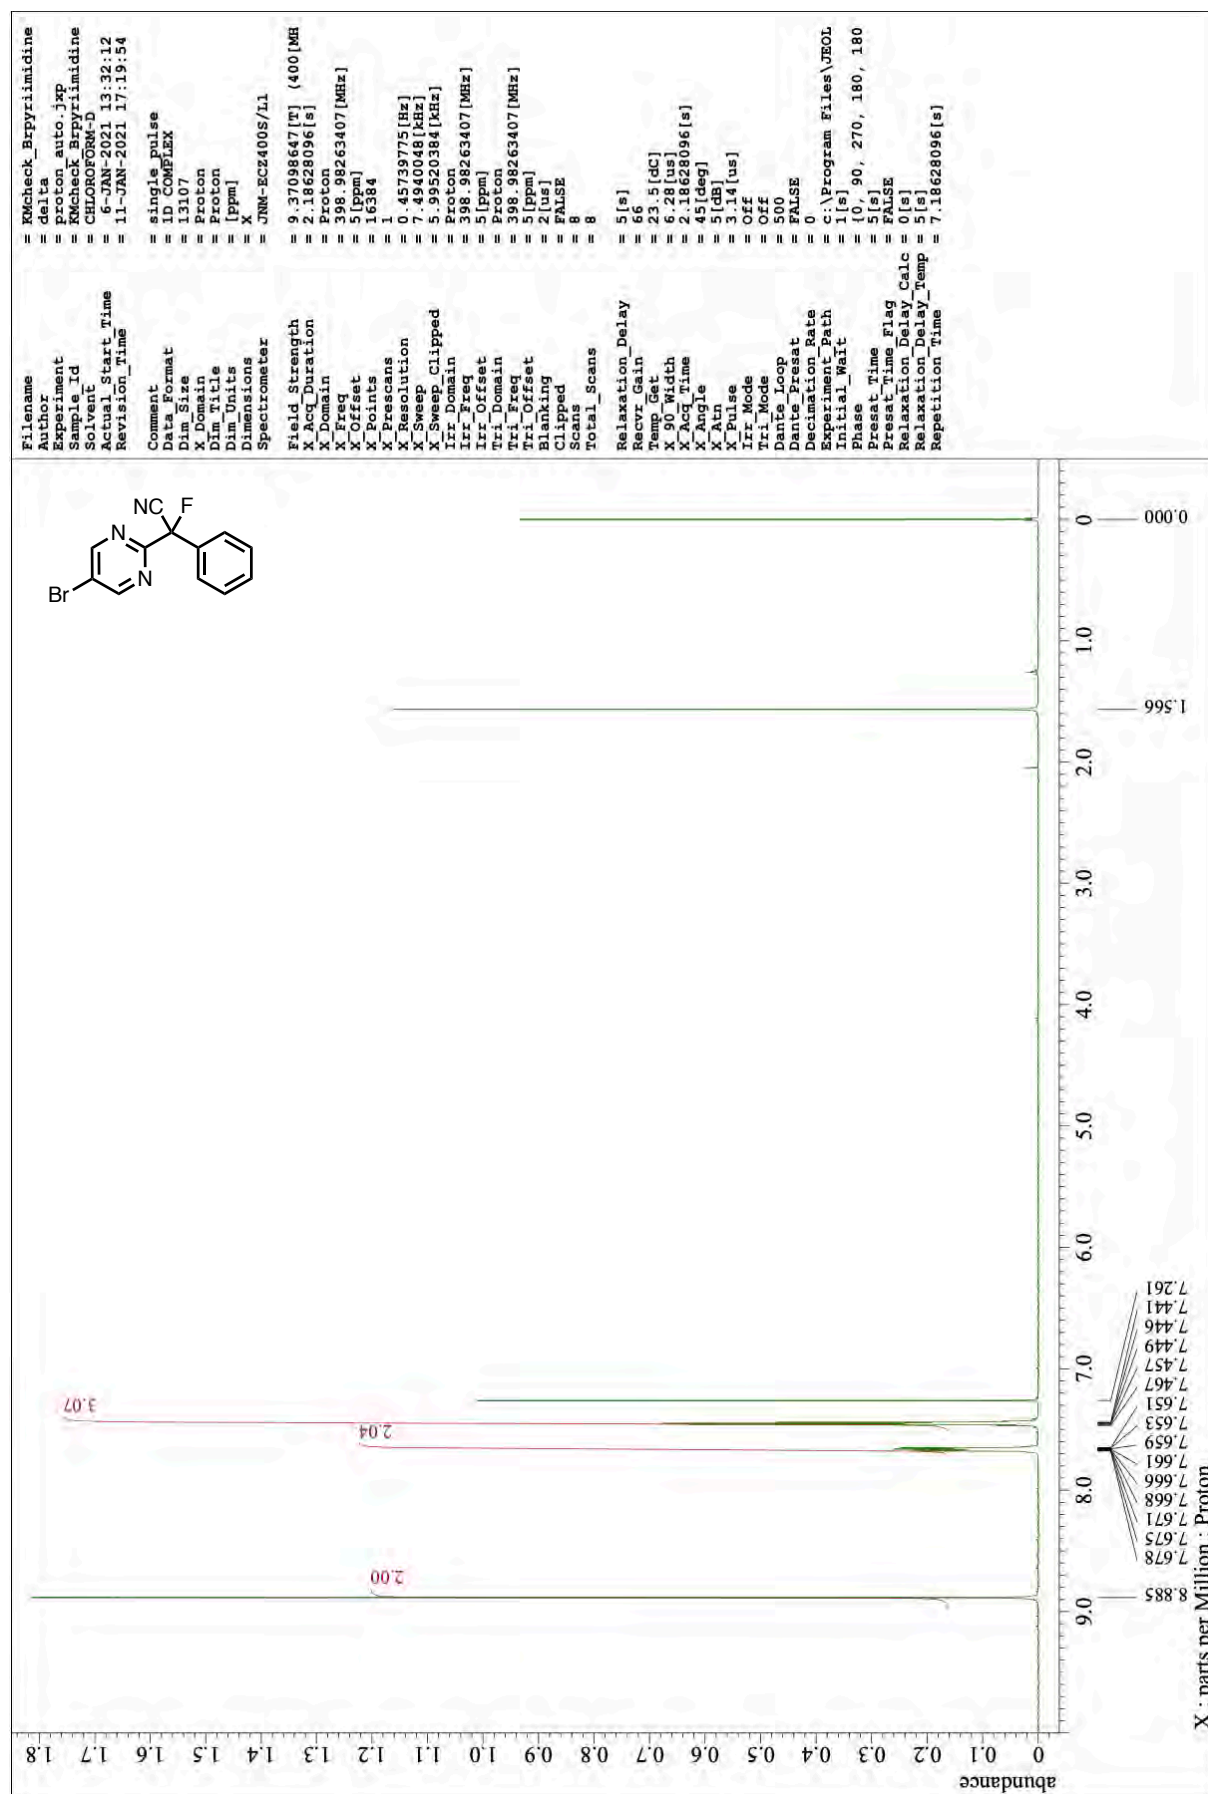

<sup>13</sup>C NMR of 2AJ (101 MHz, CDCl<sub>3</sub>)

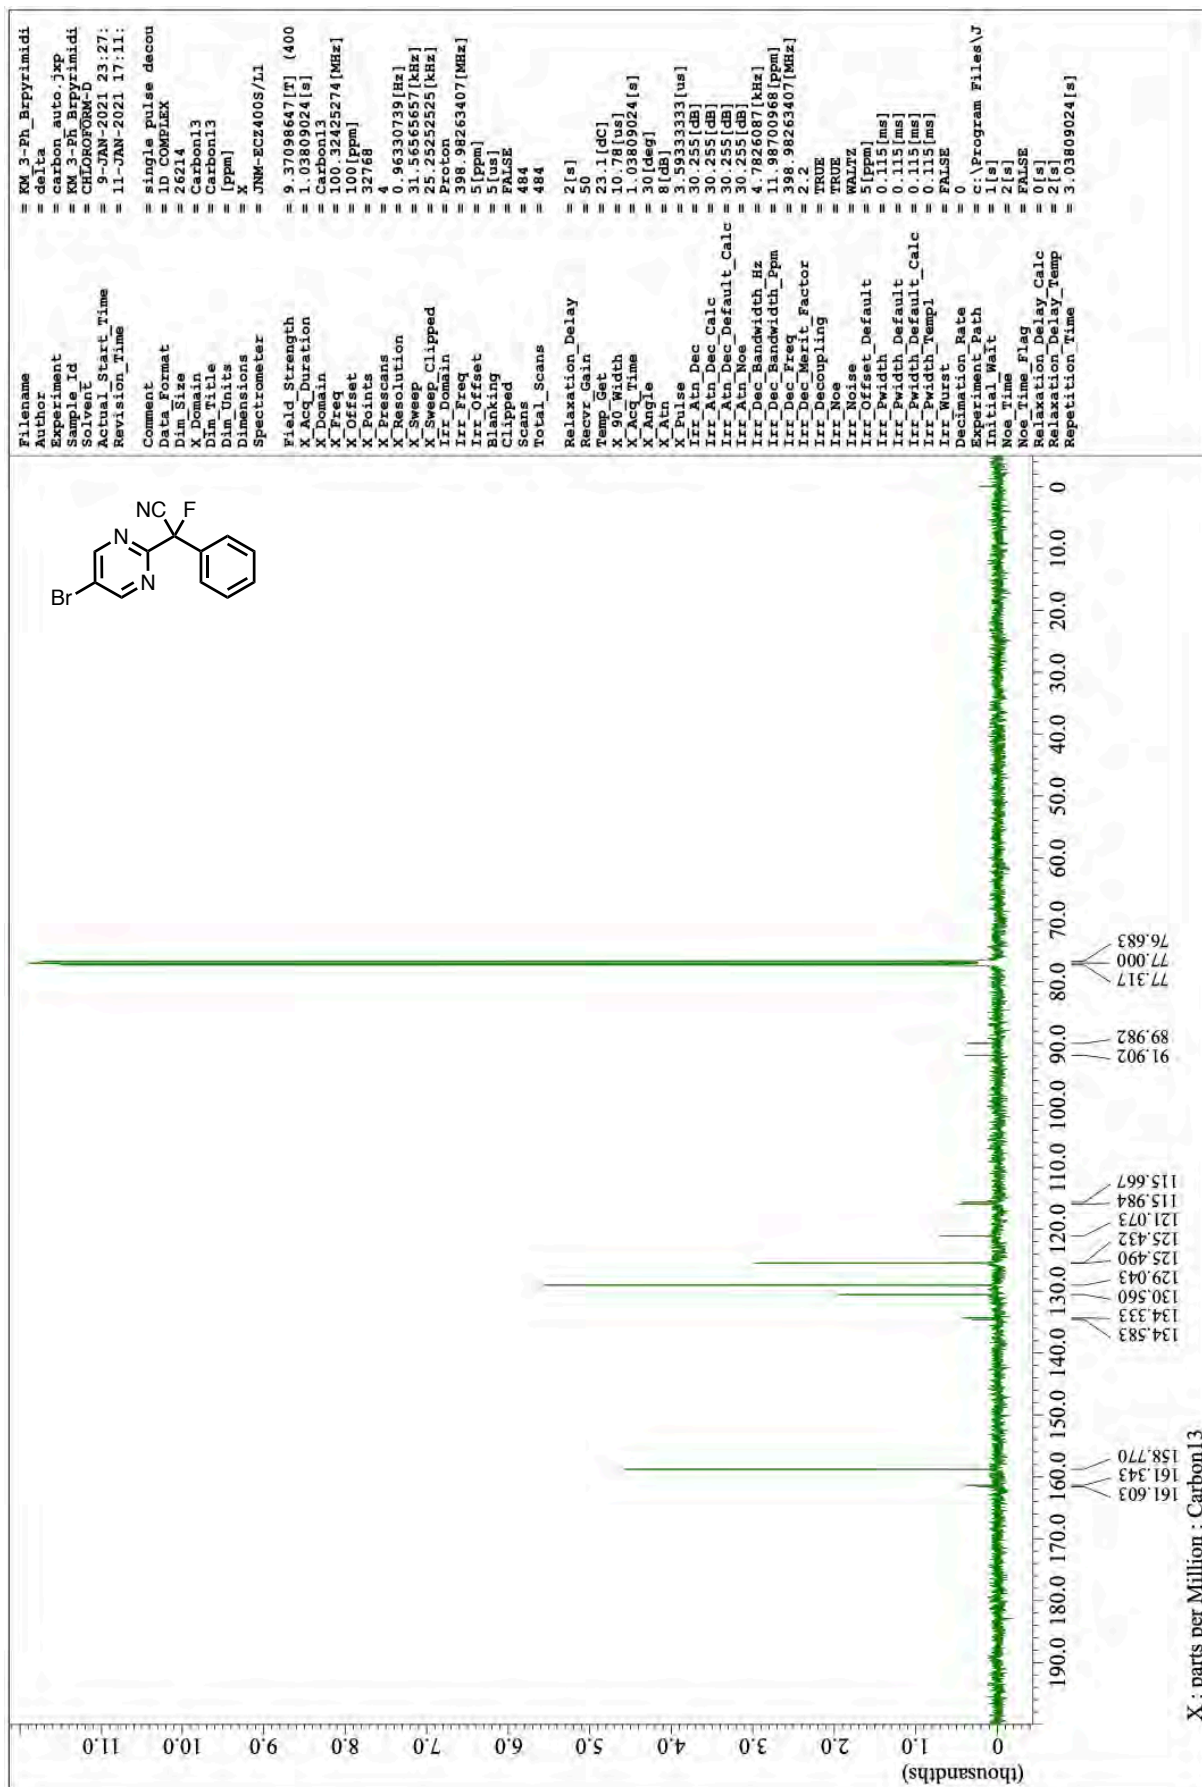

<sup>19</sup>F NMR of 2AJ (376 MHz, CDCl<sub>3</sub>)

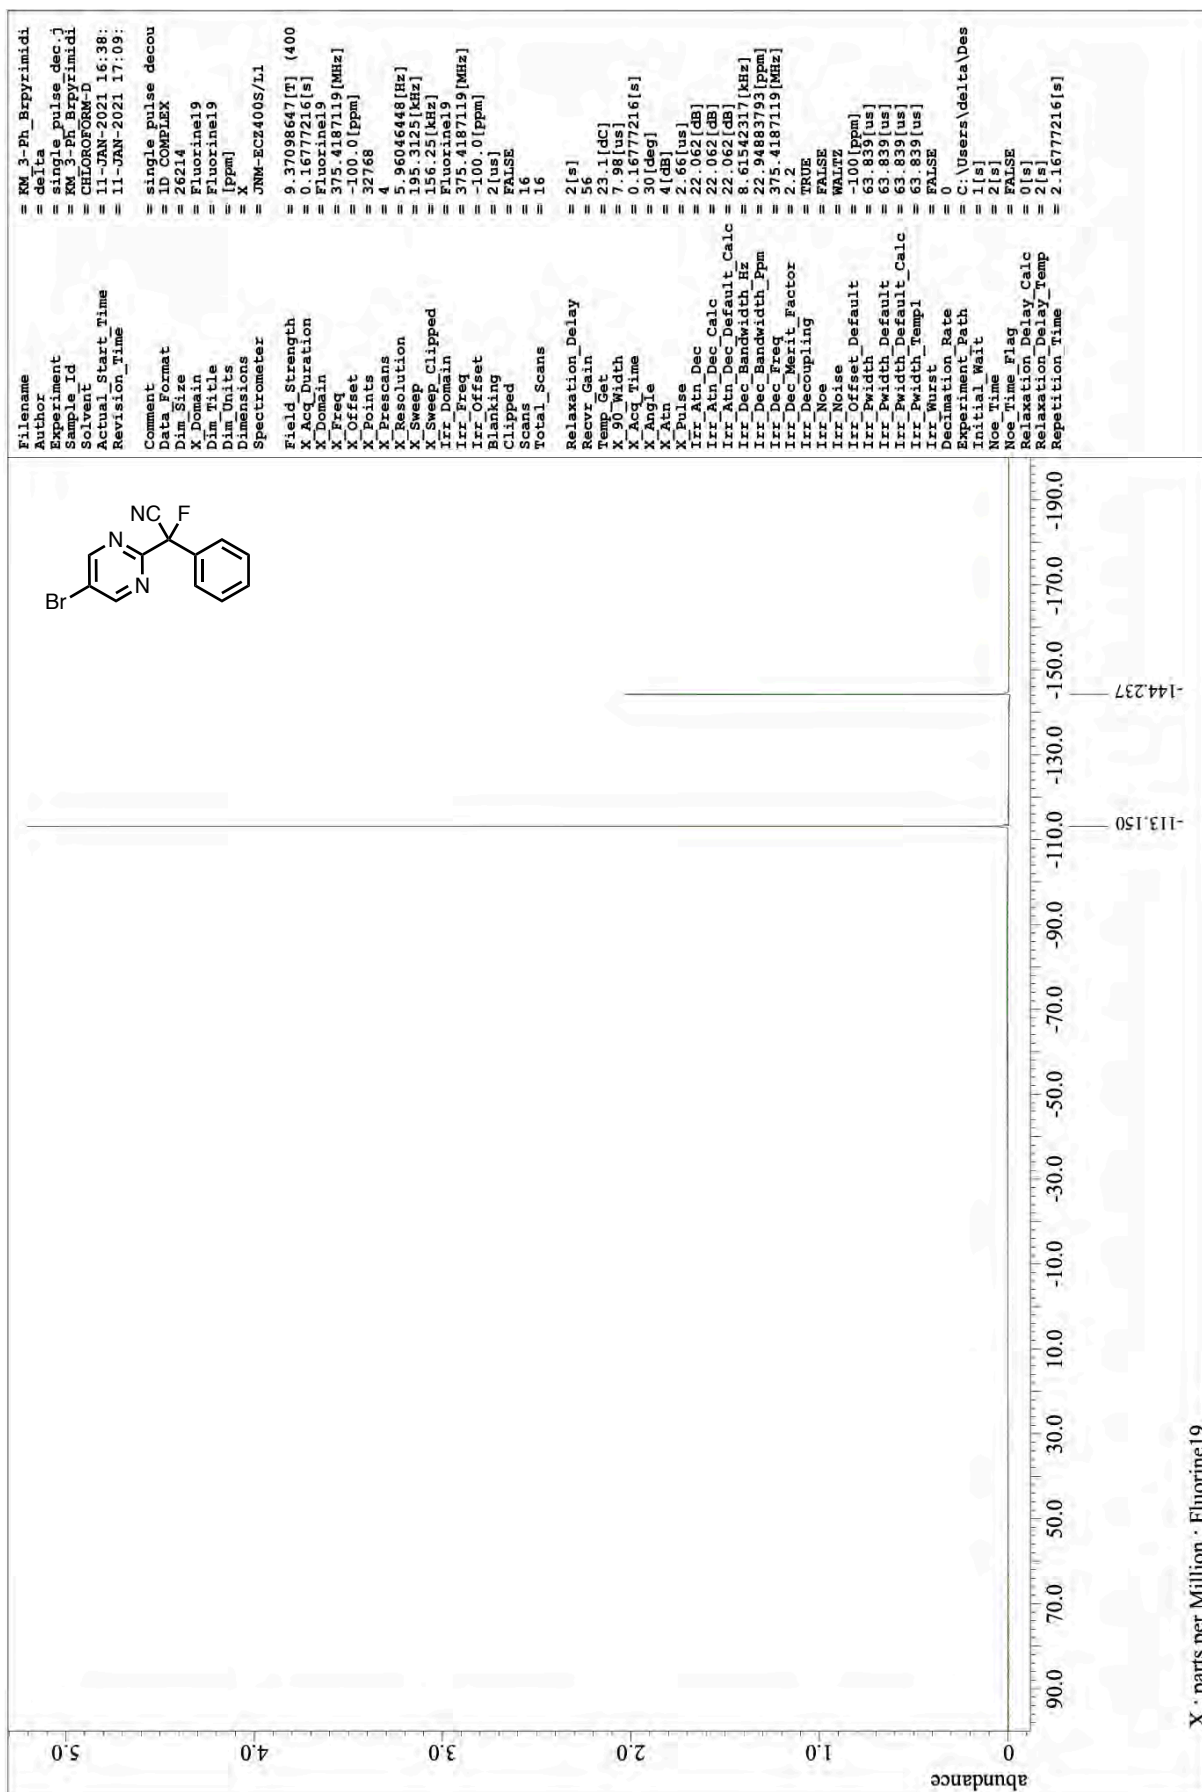

<sup>1</sup>H NMR of 2AK (400 MHz, CDCl<sub>3</sub>)

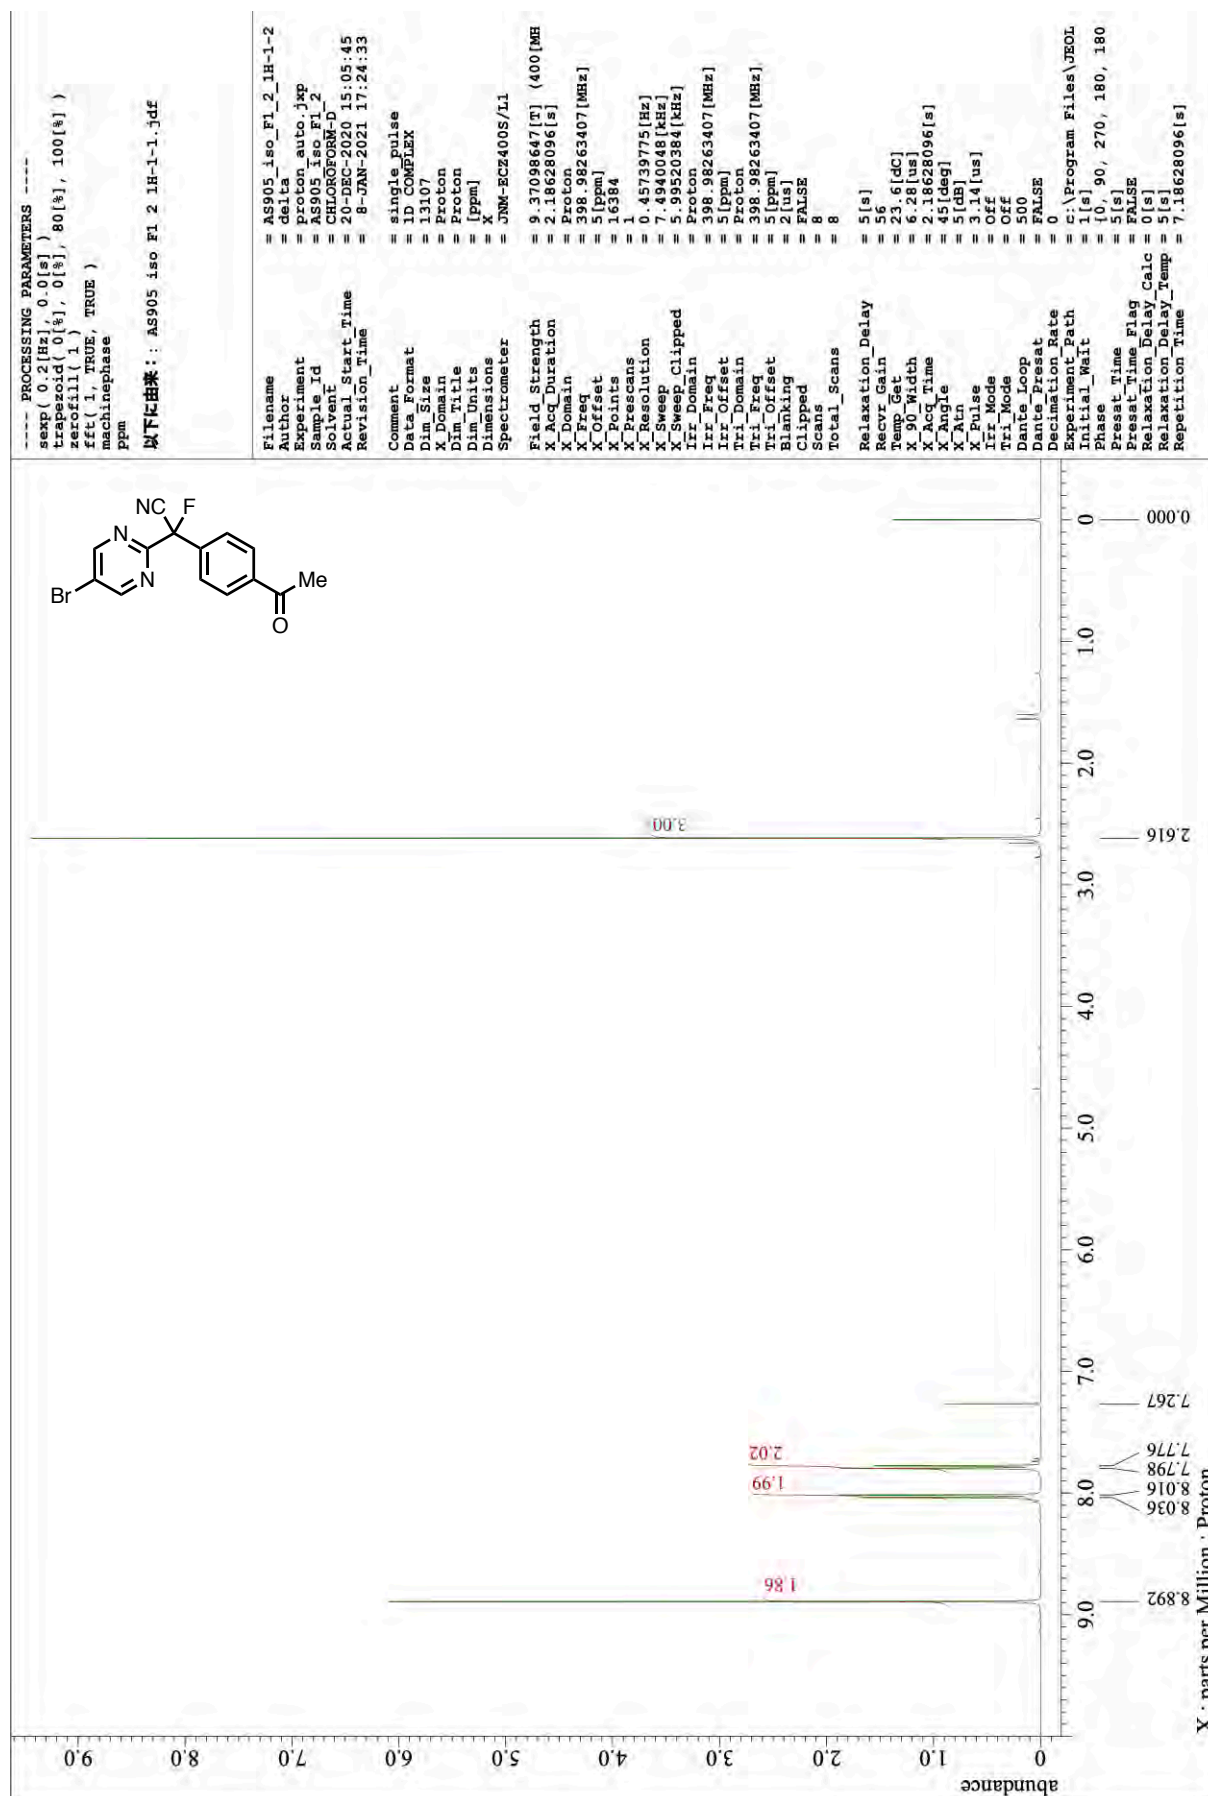

<sup>13</sup>C NMR of 2AK (101 MHz, CDCl<sub>3</sub>)

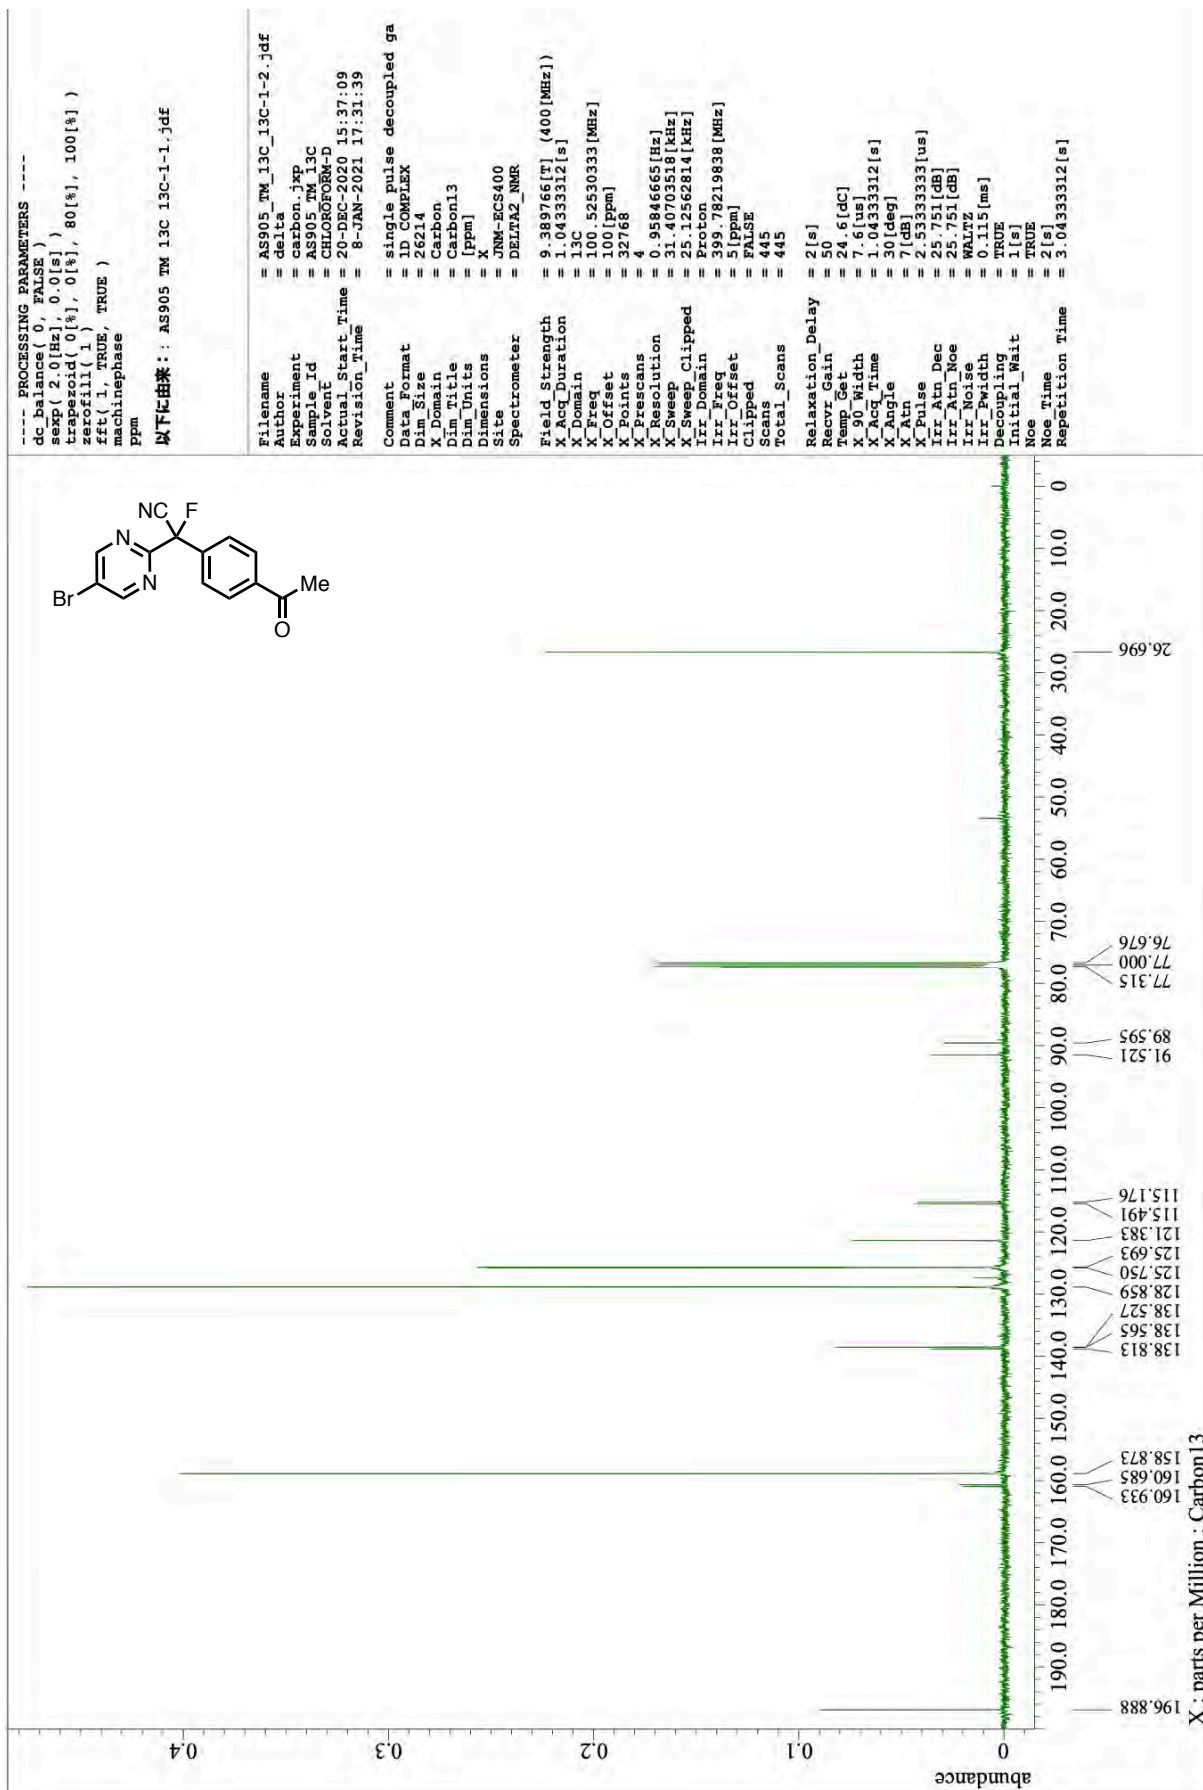

<sup>19</sup>F NMR of 2AK (376 MHz, CDCl<sub>3</sub>)

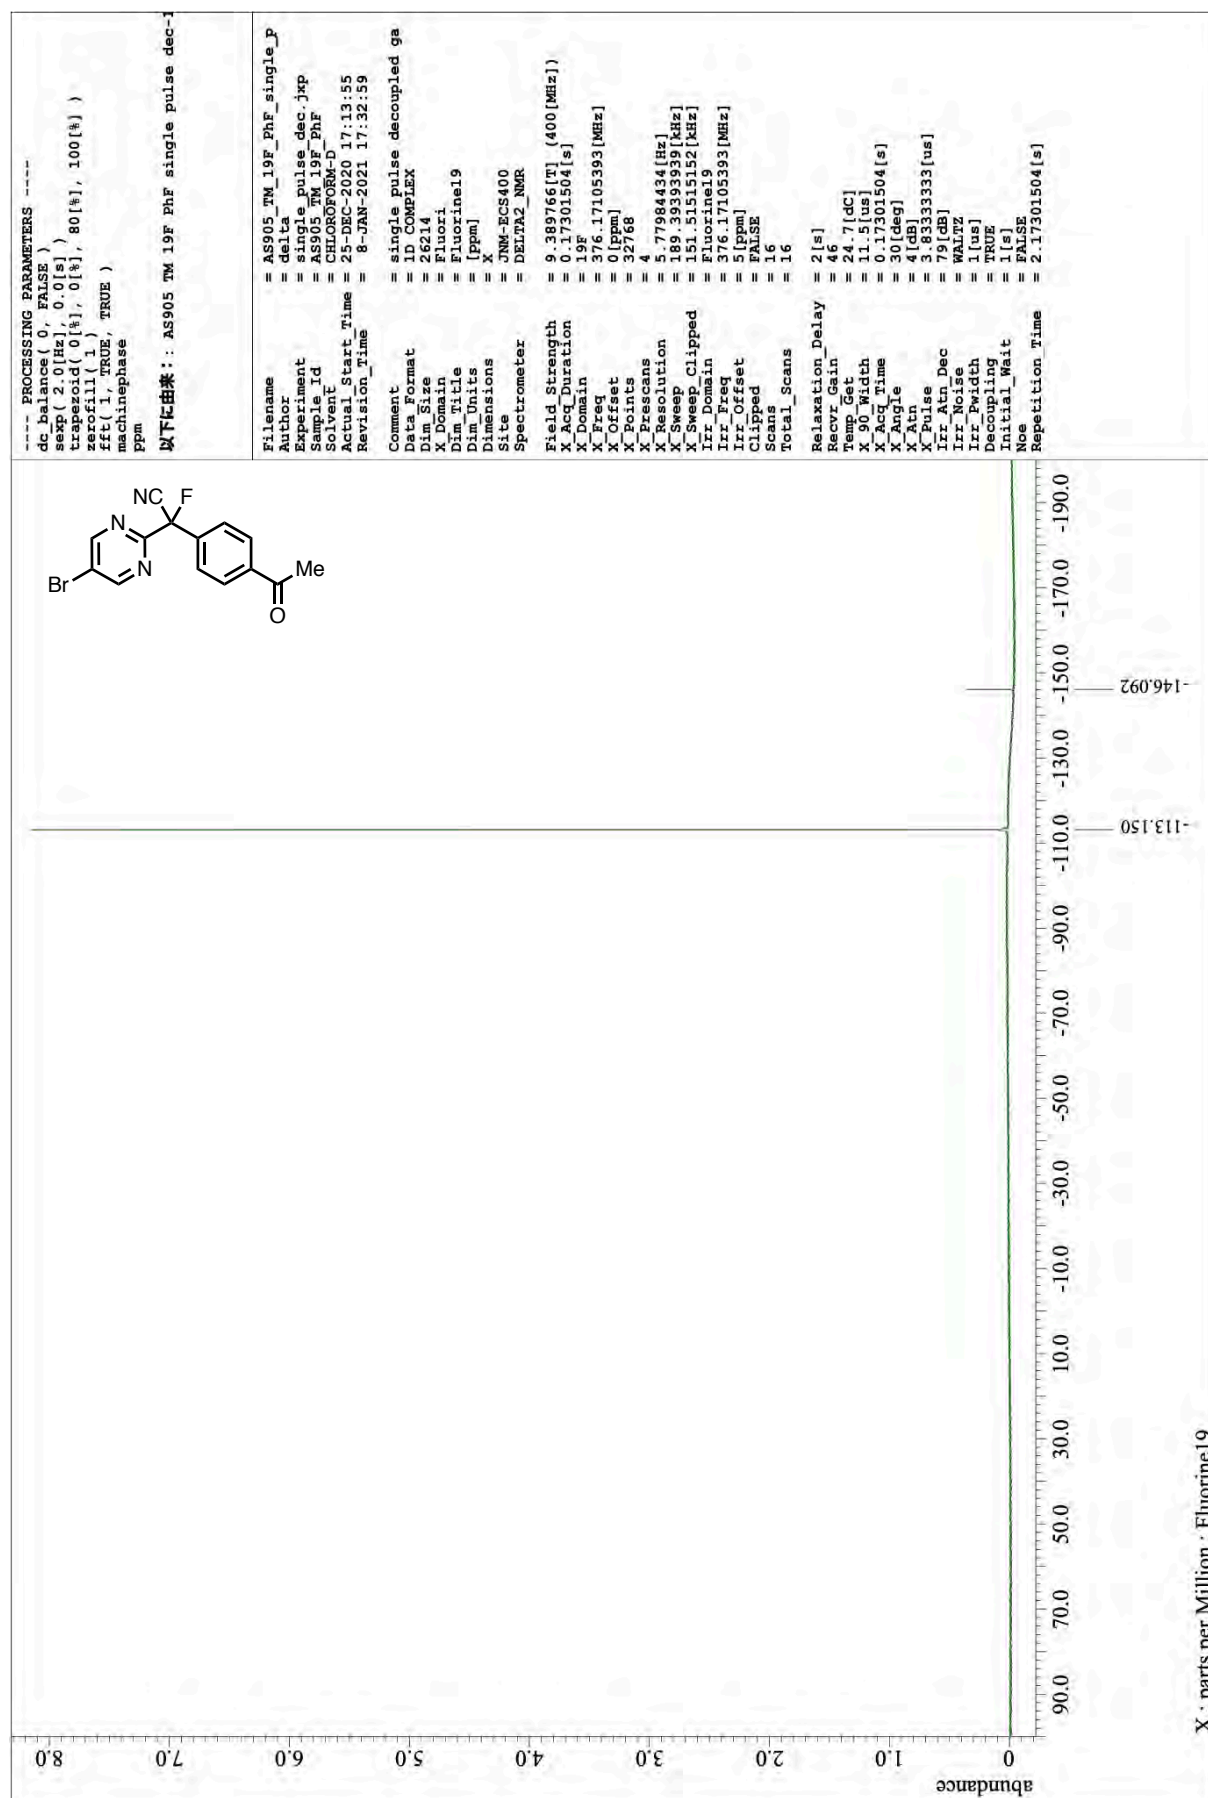



<sup>1</sup>H NMR of 2AL (400 MHz, CDCl<sub>3</sub>)

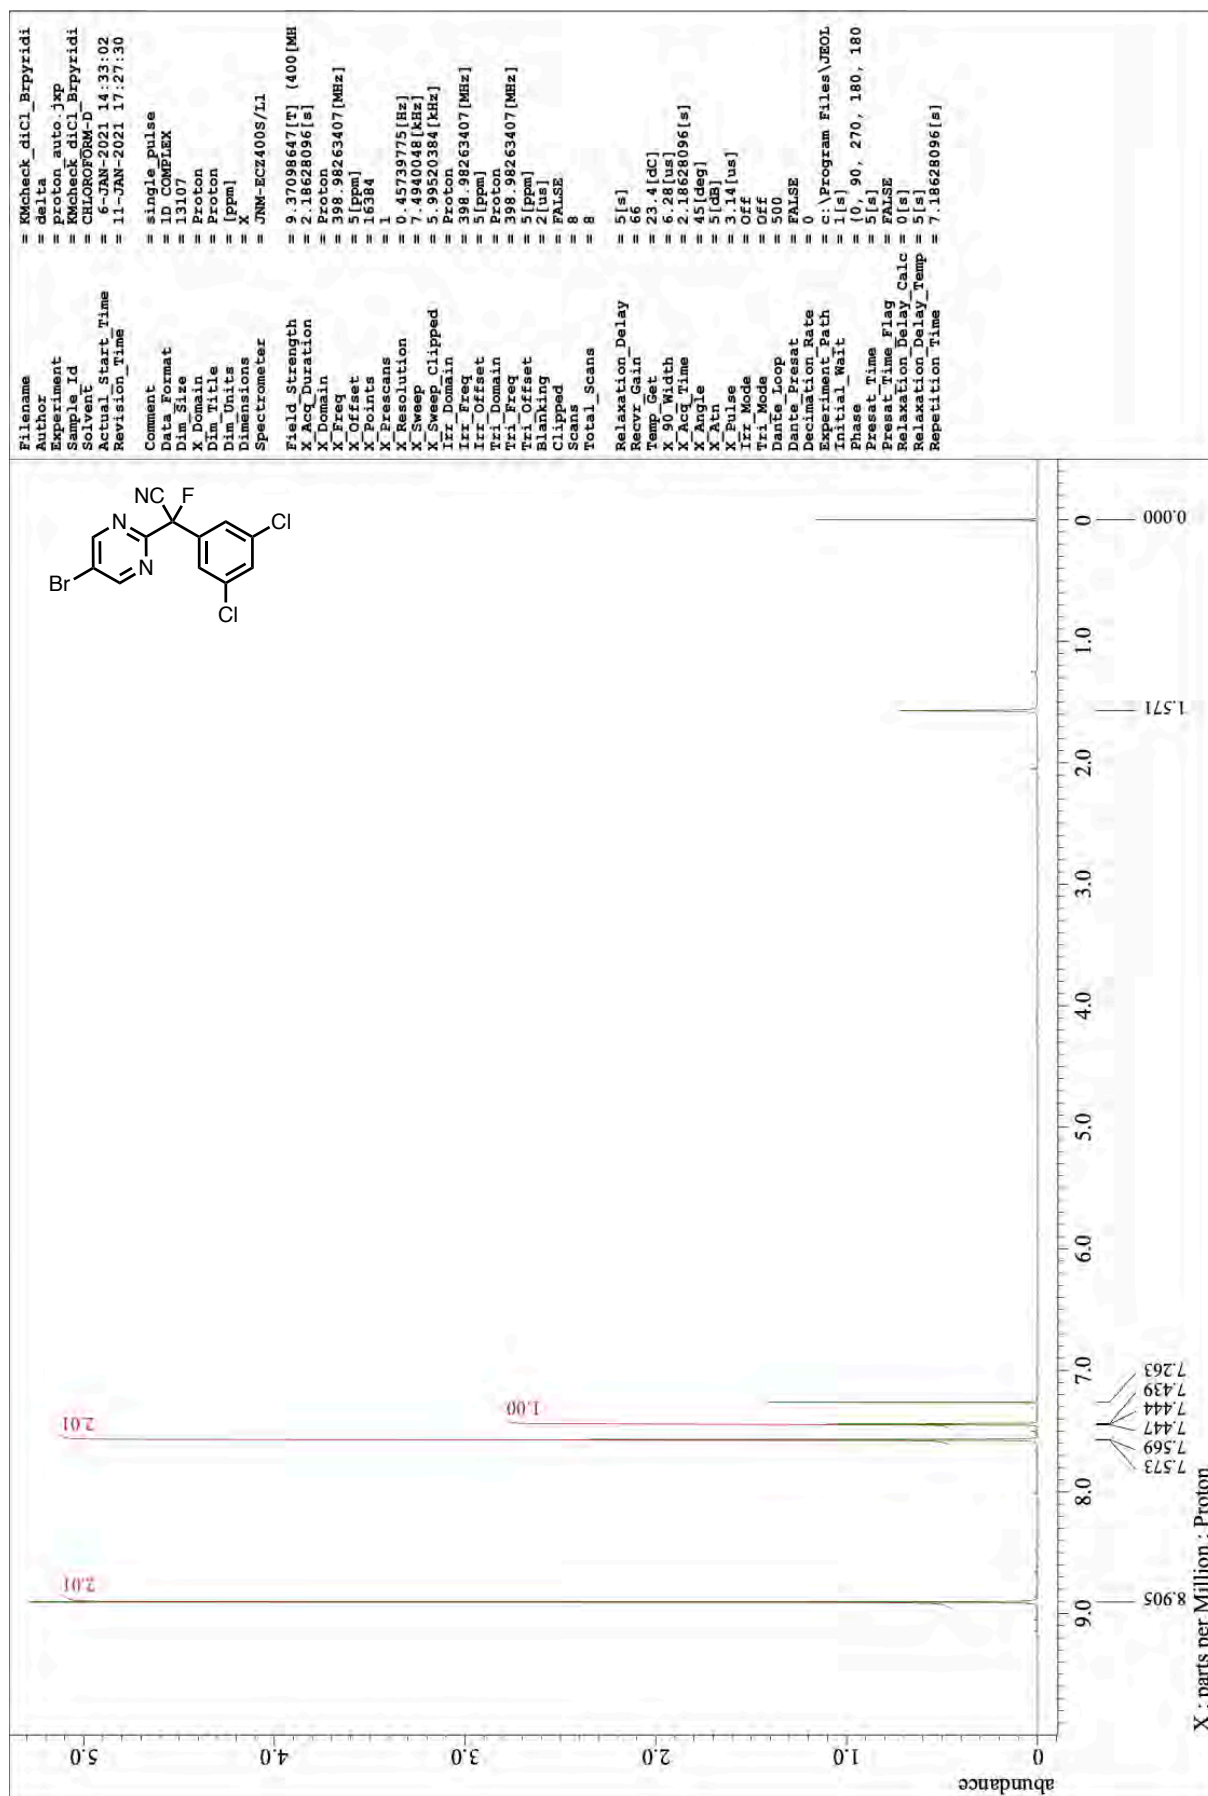

<sup>13</sup>C NMR of 2AL (101 MHz, CDCl<sub>3</sub>)

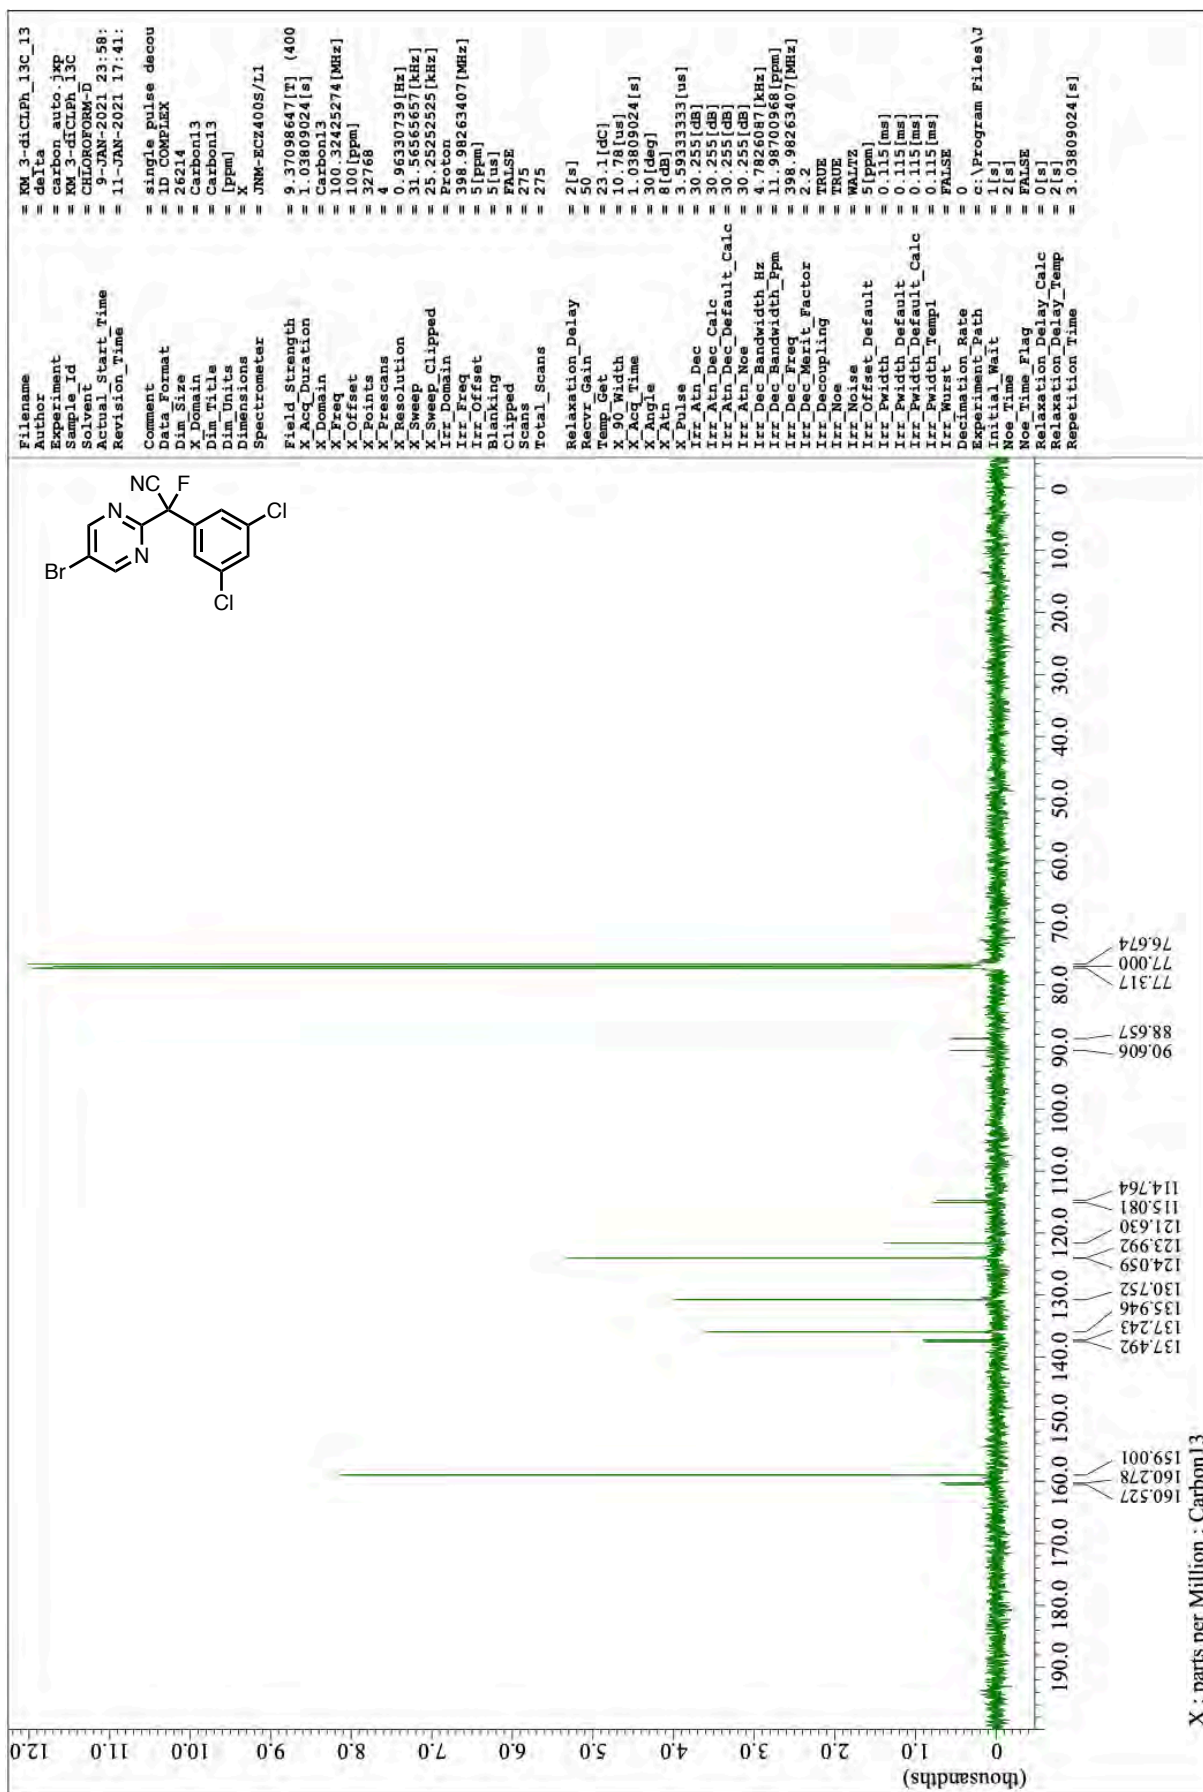

<sup>19</sup>F NMR of 2AL (376 MHz, CDCl<sub>3</sub>)

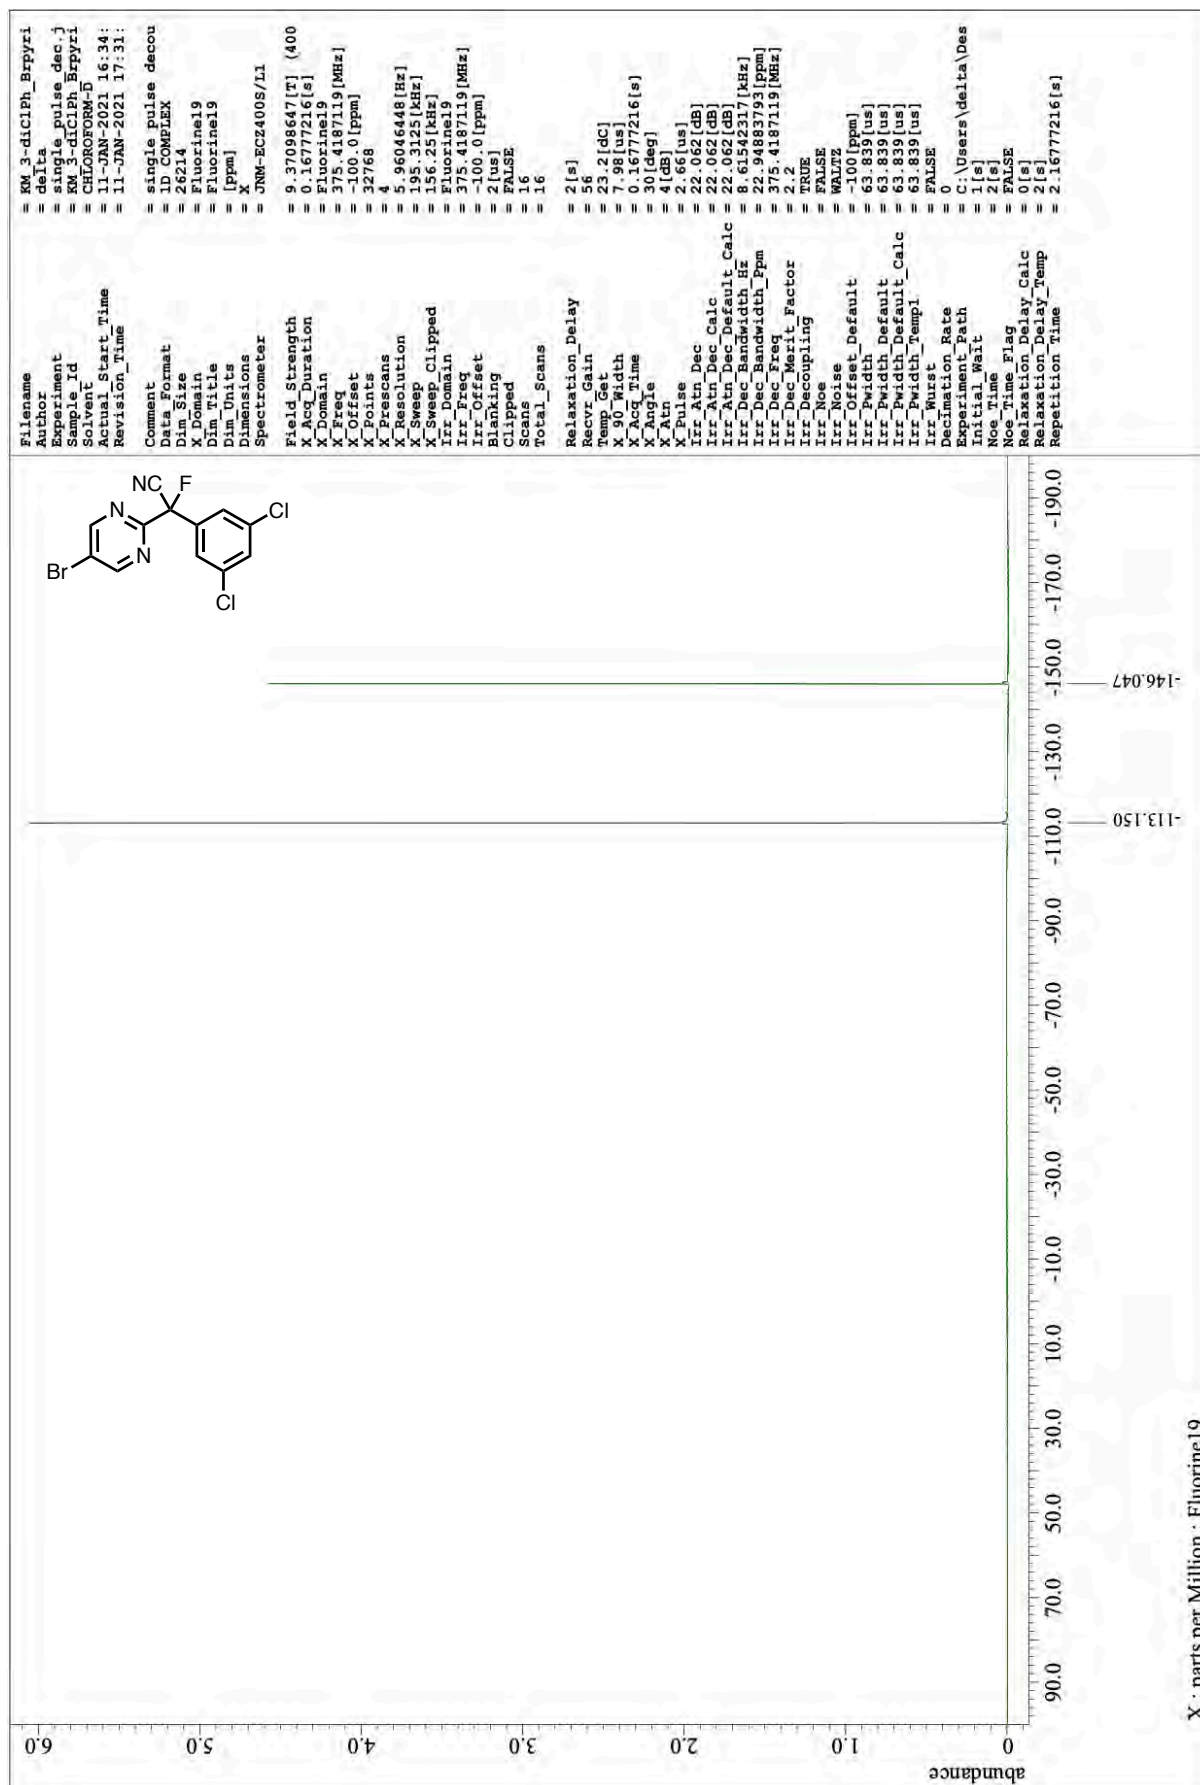

<sup>1</sup>H NMR of 2AM (400 MHz, CDCl<sub>3</sub>)

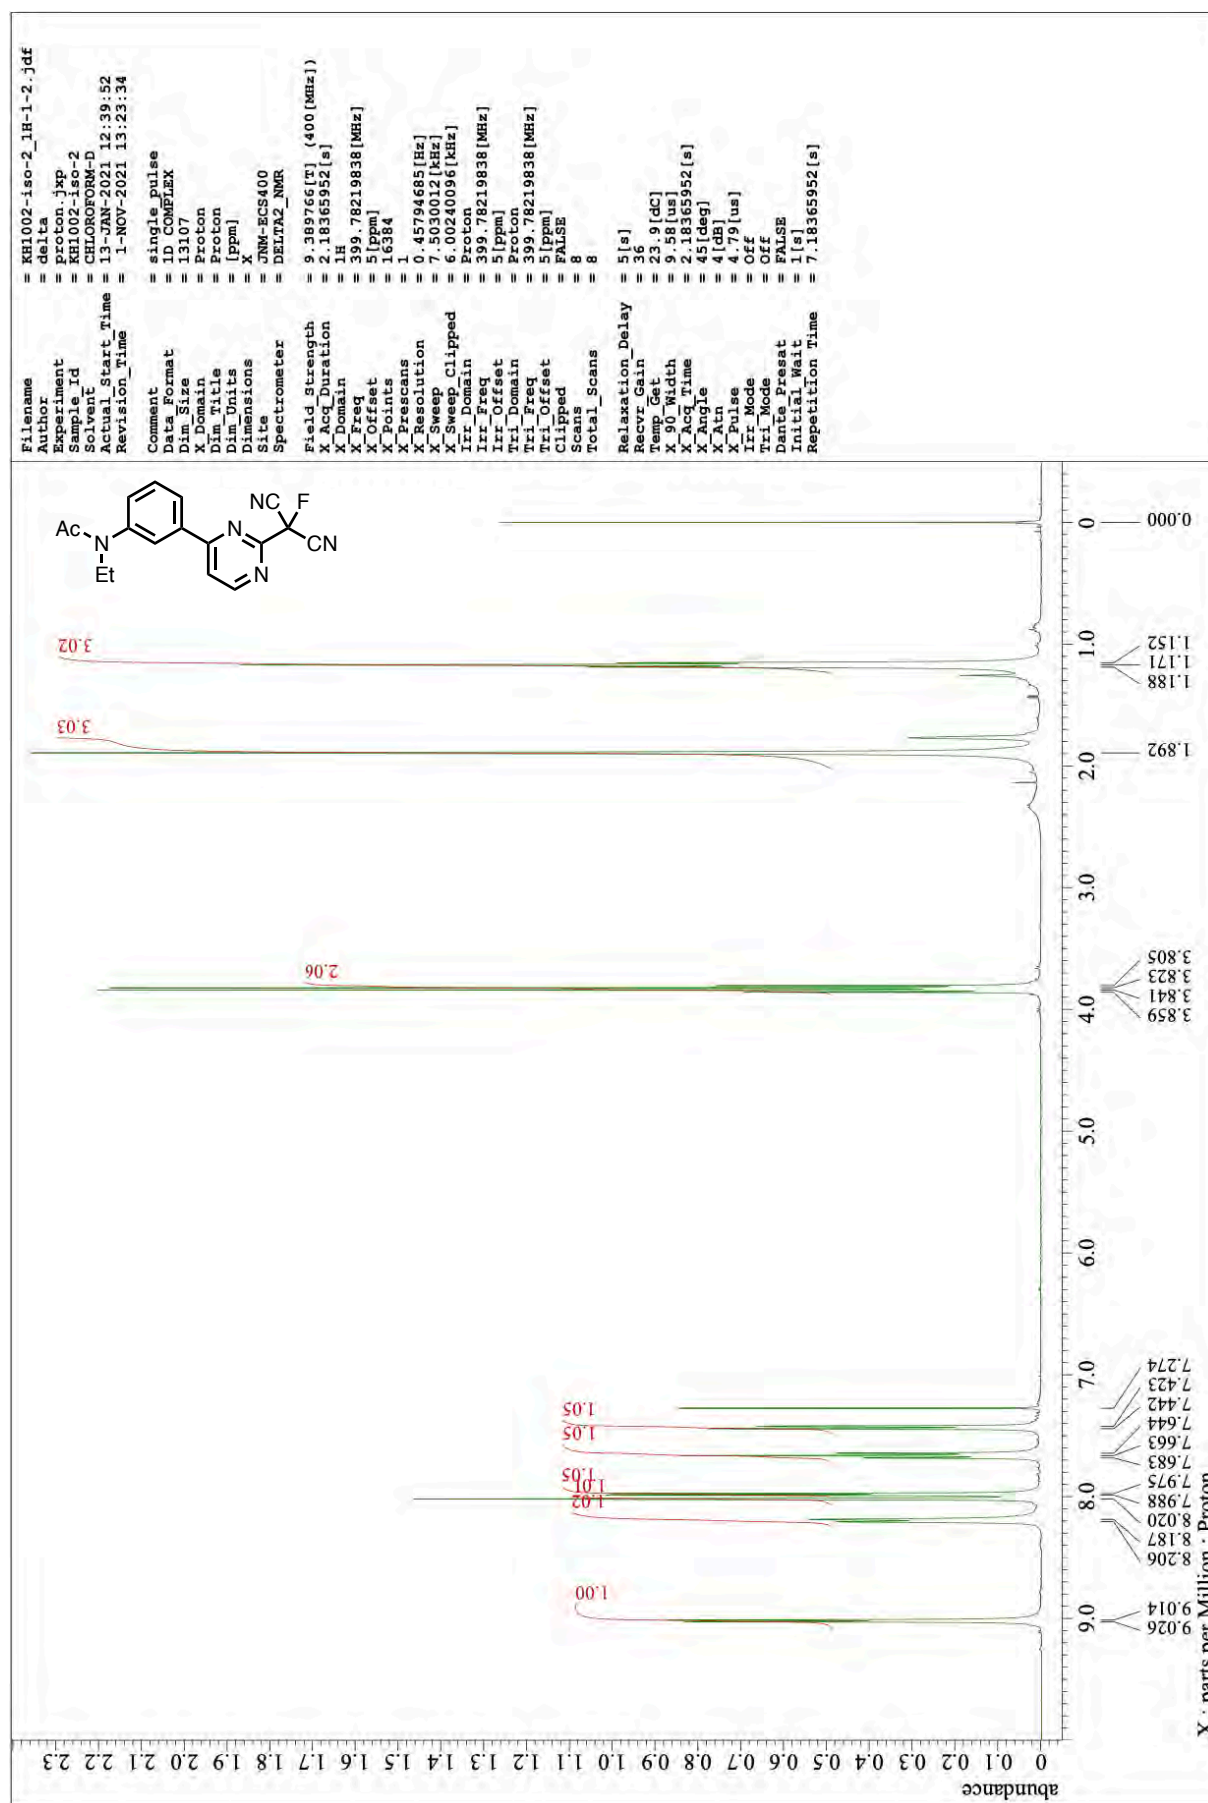

<sup>13</sup>C NMR of 2AM (101 MHz, CDCl<sub>3</sub>)

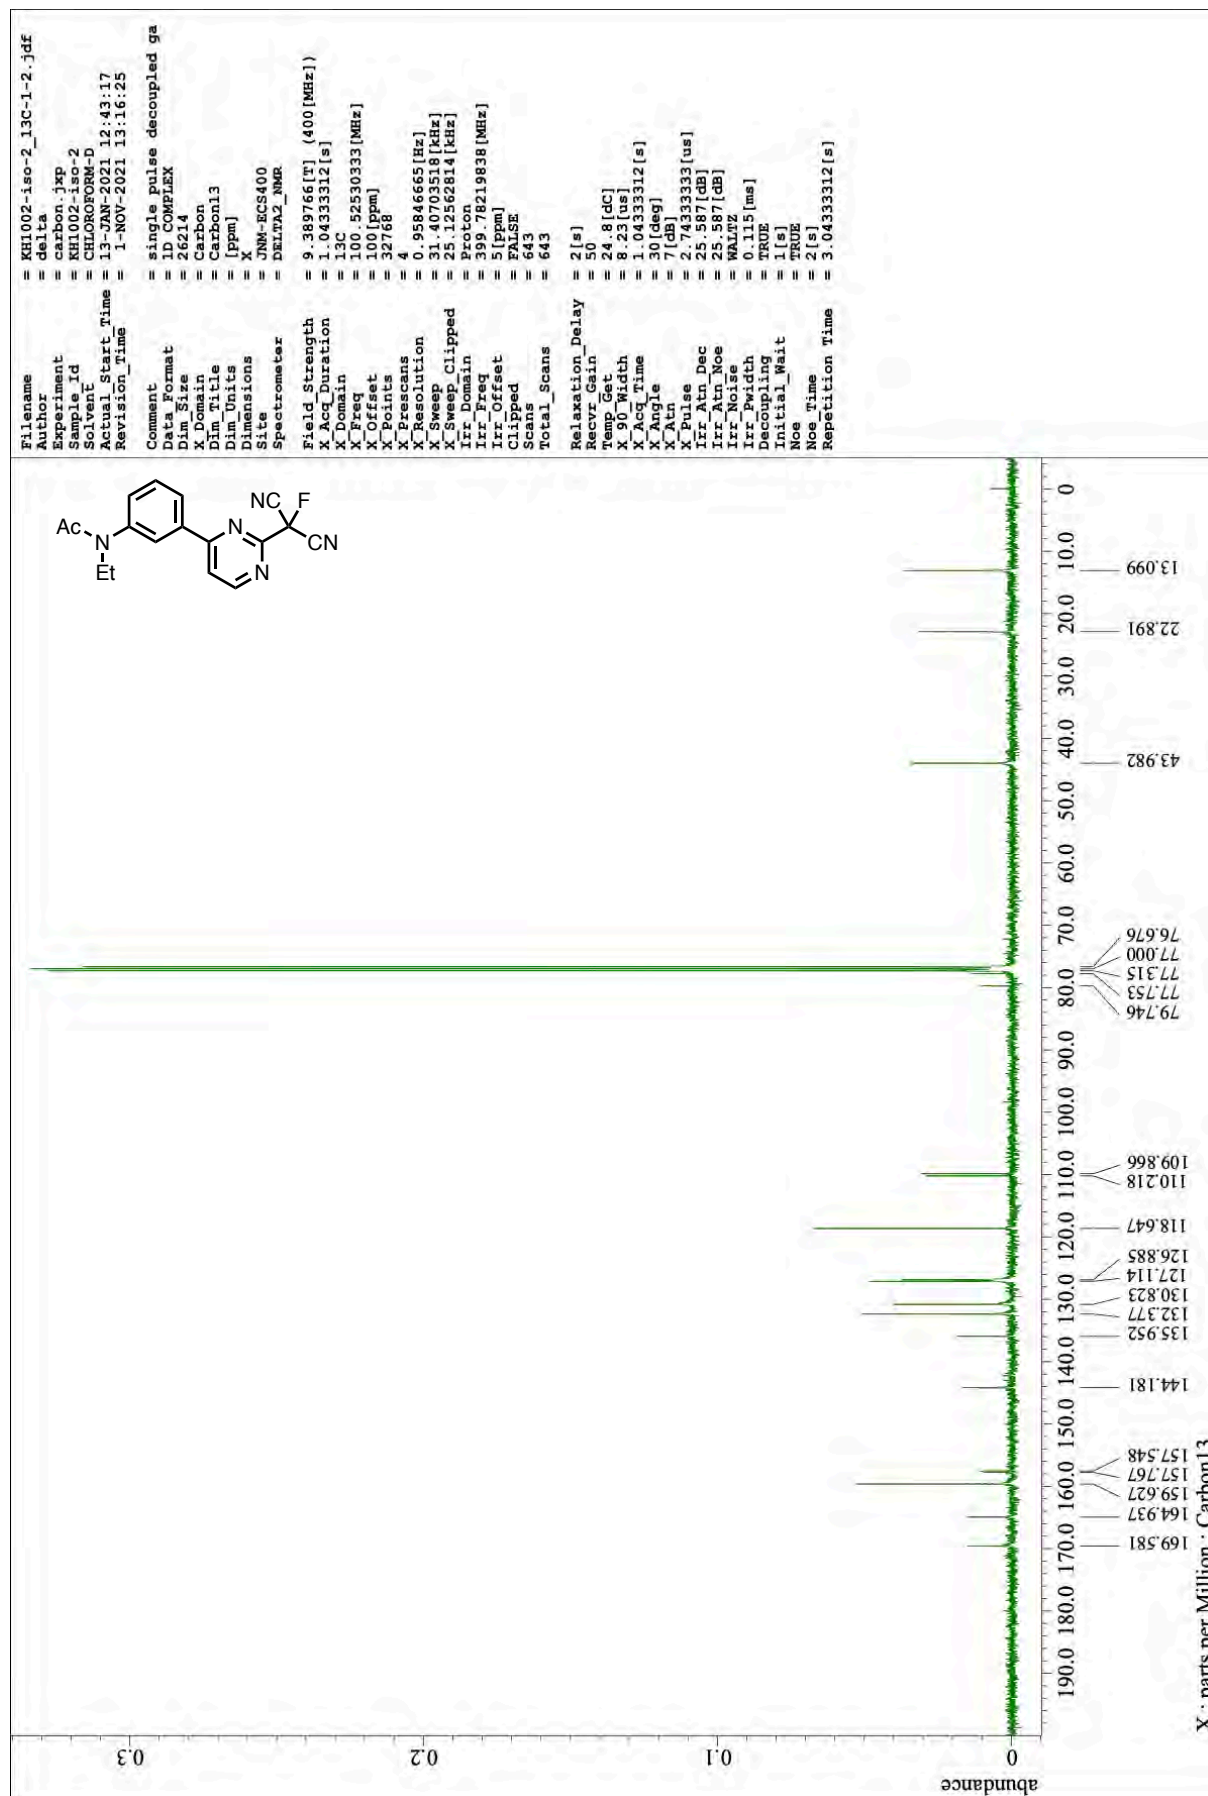

<sup>19</sup>F NMR of 2AM (376 MHz, CDCl<sub>3</sub>)

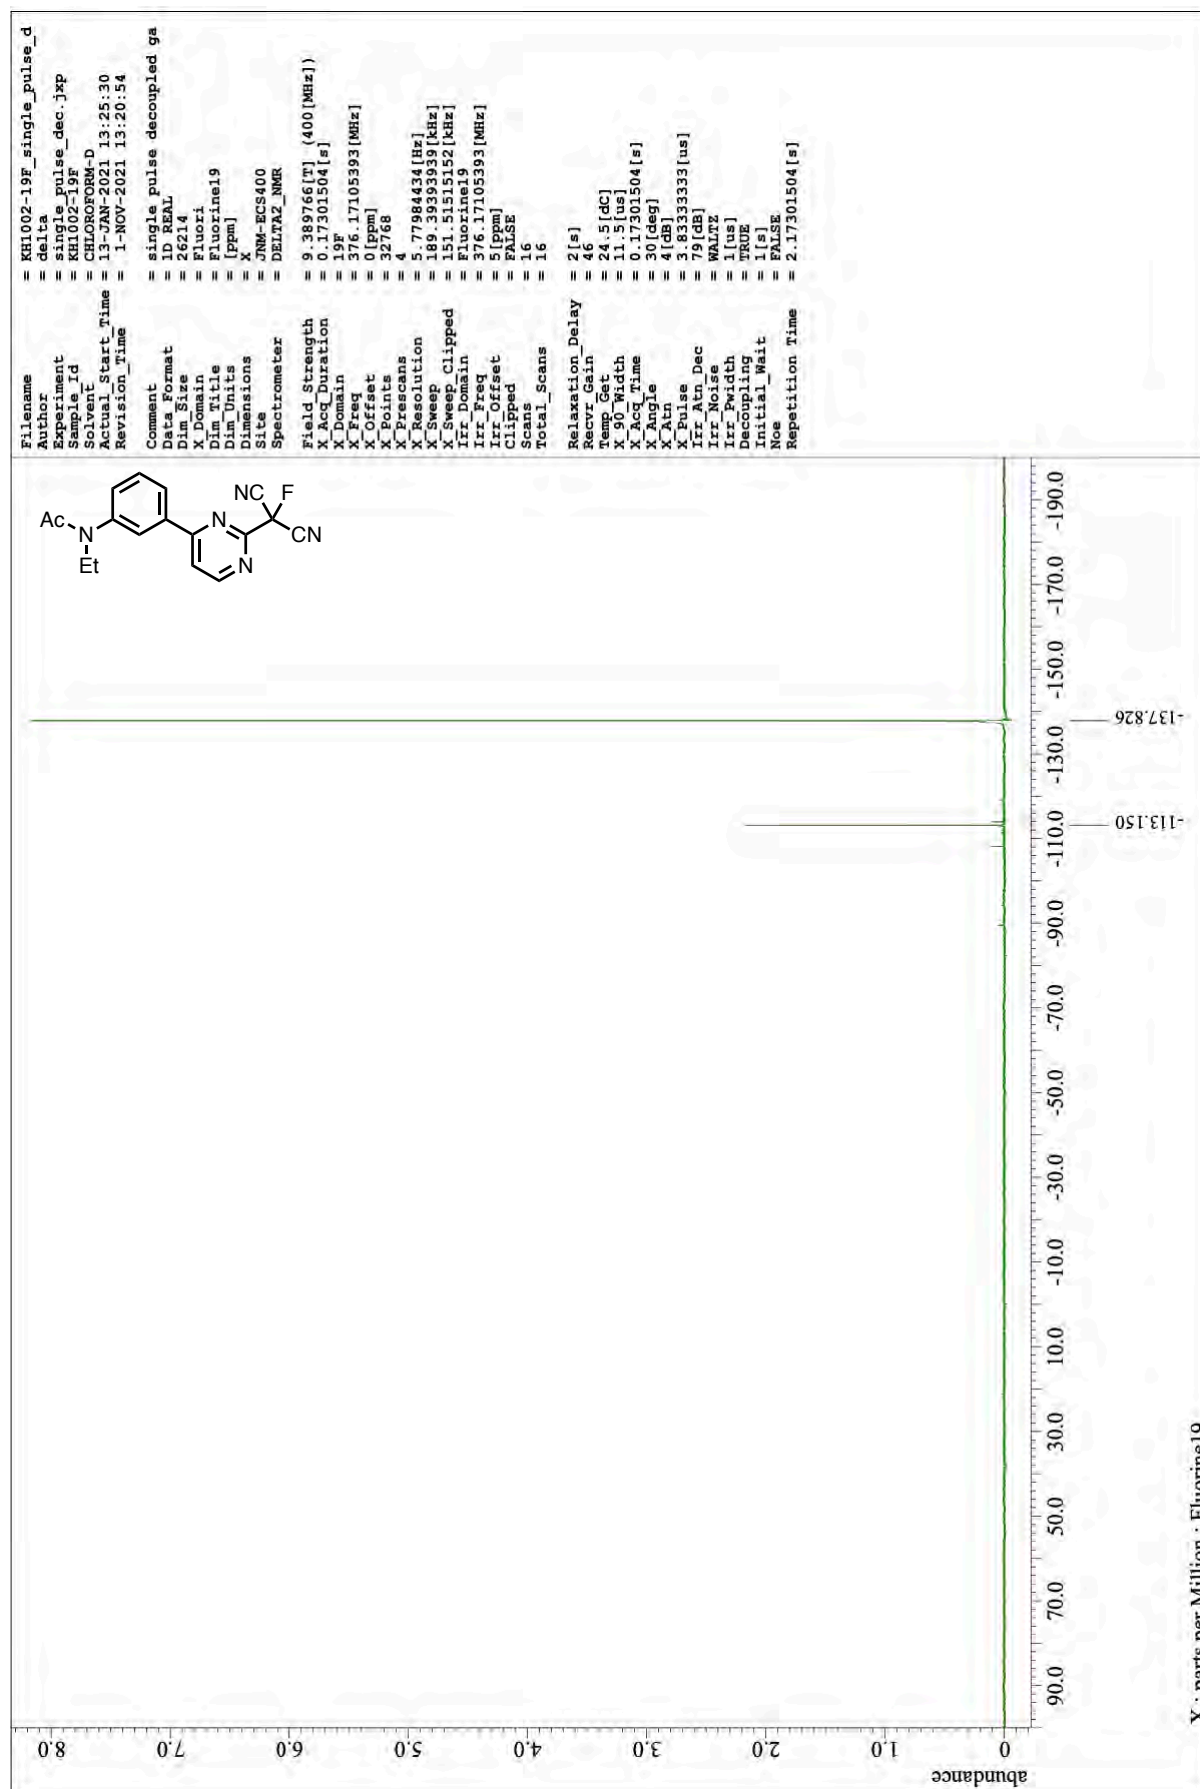

<sup>1</sup>H NMR of 2AN (400 MHz, CDCl<sub>3</sub>)

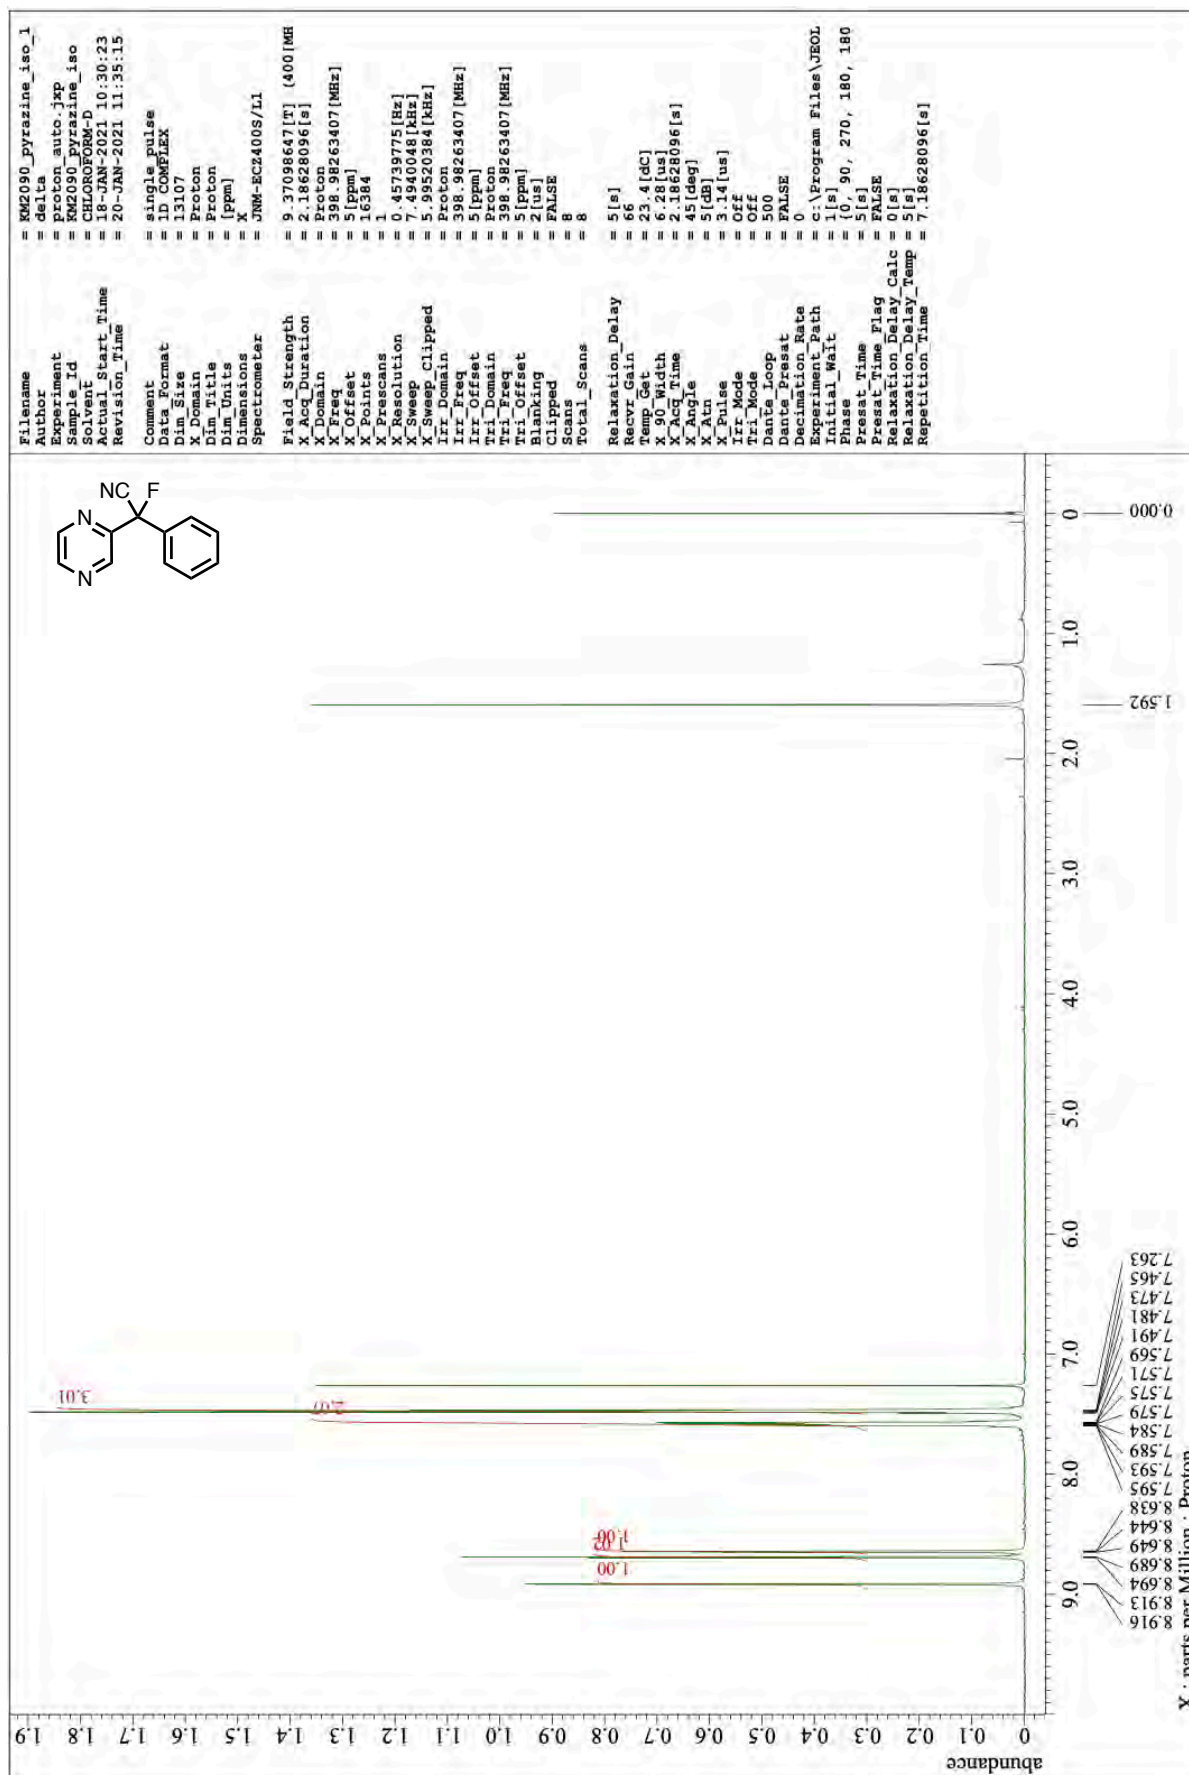

<sup>13</sup>C NMR of 2AN (101 MHz, CDCl<sub>3</sub>)

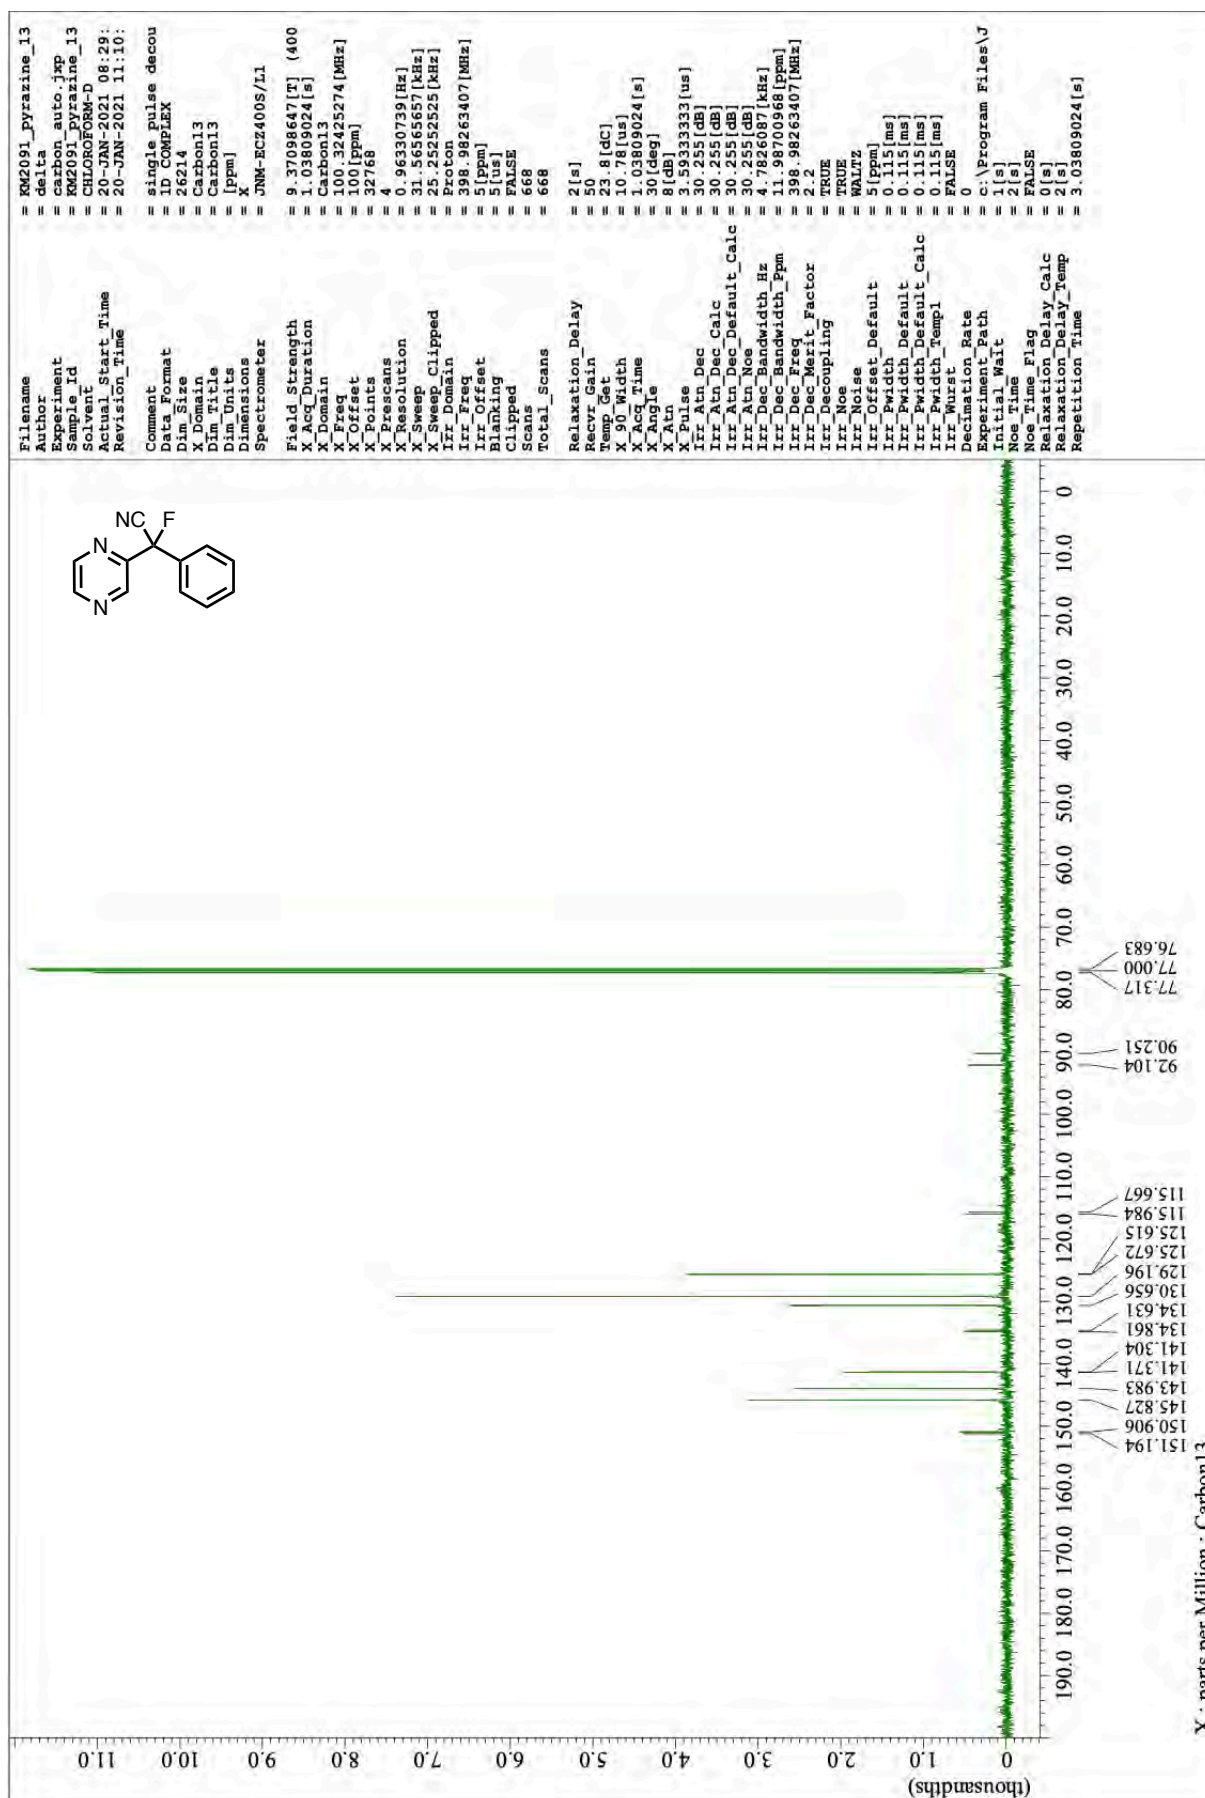



<sup>19</sup>F NMR of 2AN (376 MHz, CDCl<sub>3</sub>)

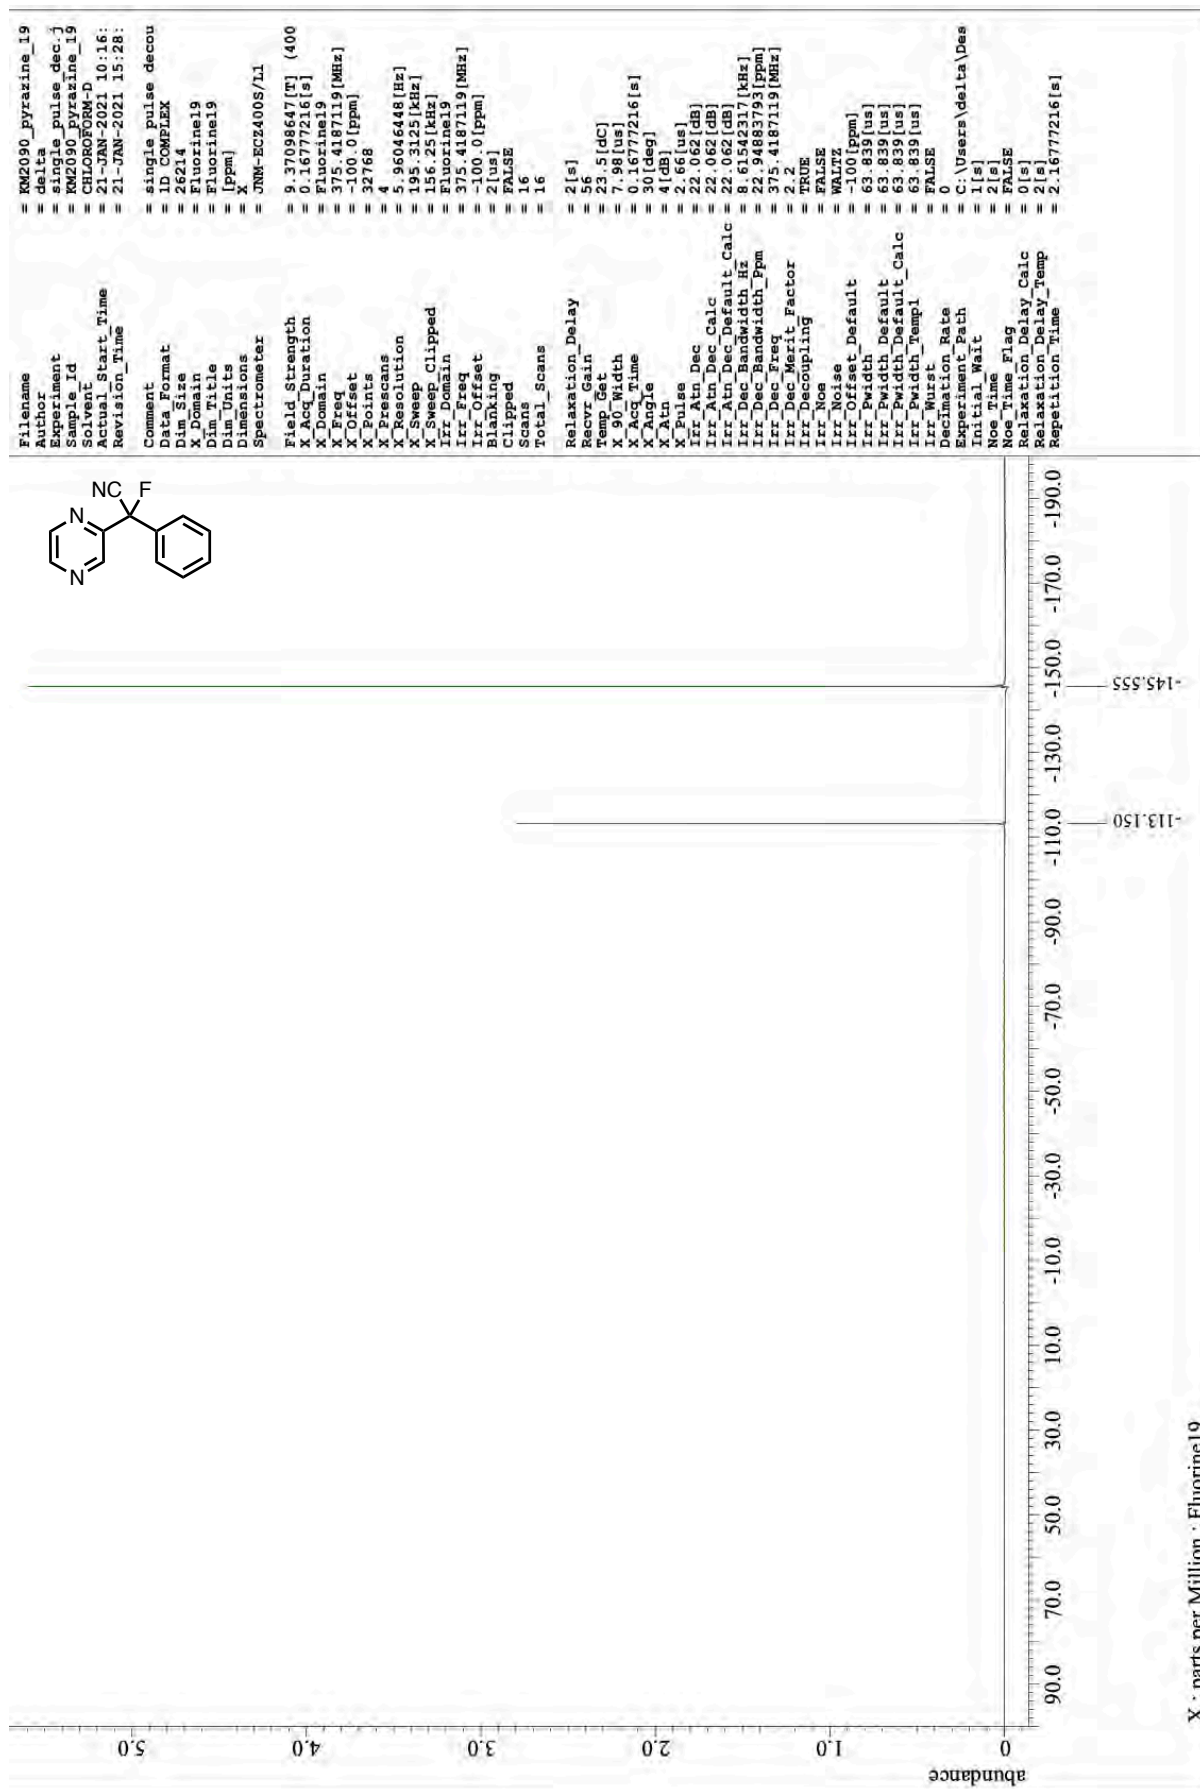

<sup>1</sup>H NMR of 2AO (400 MHz, CDCl<sub>3</sub>)

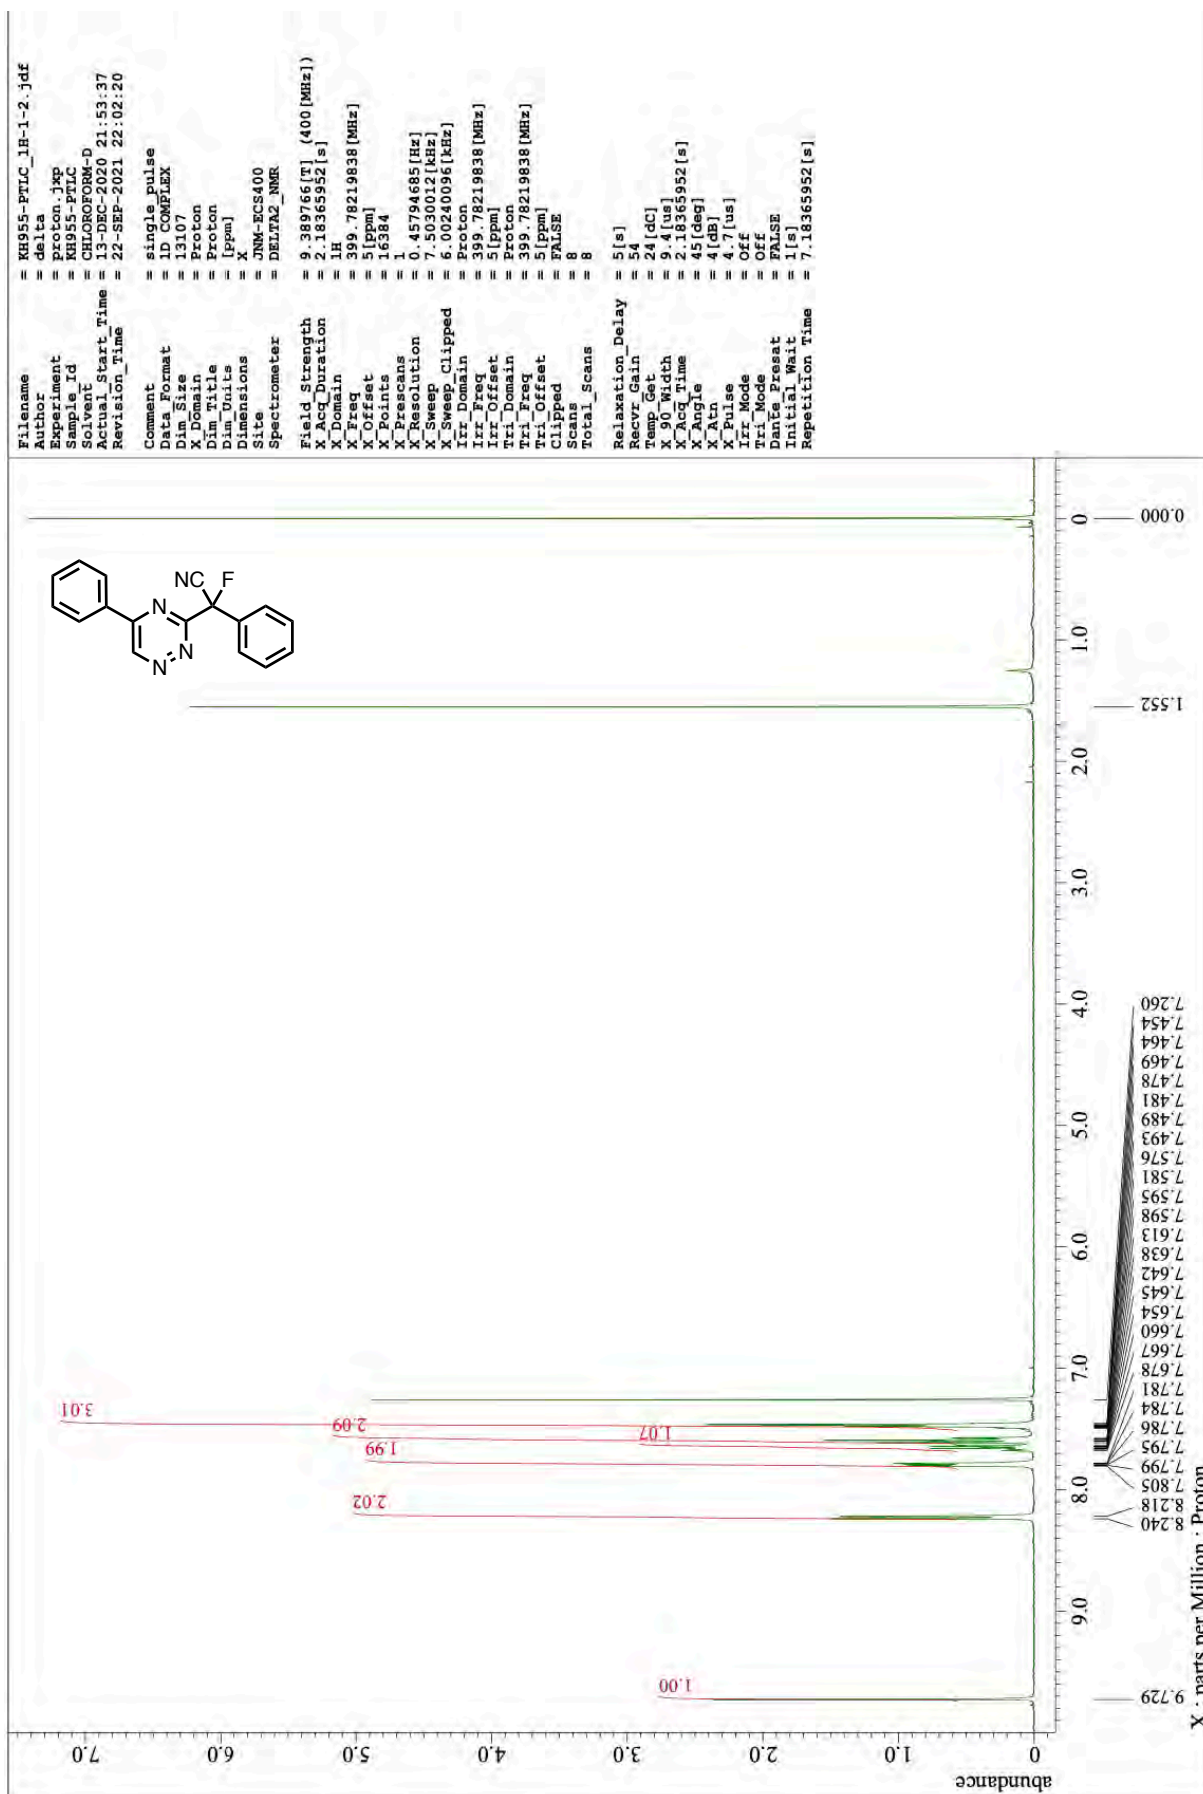

<sup>13</sup>C NMR of 2AO (101 MHz, CDCl<sub>3</sub>)

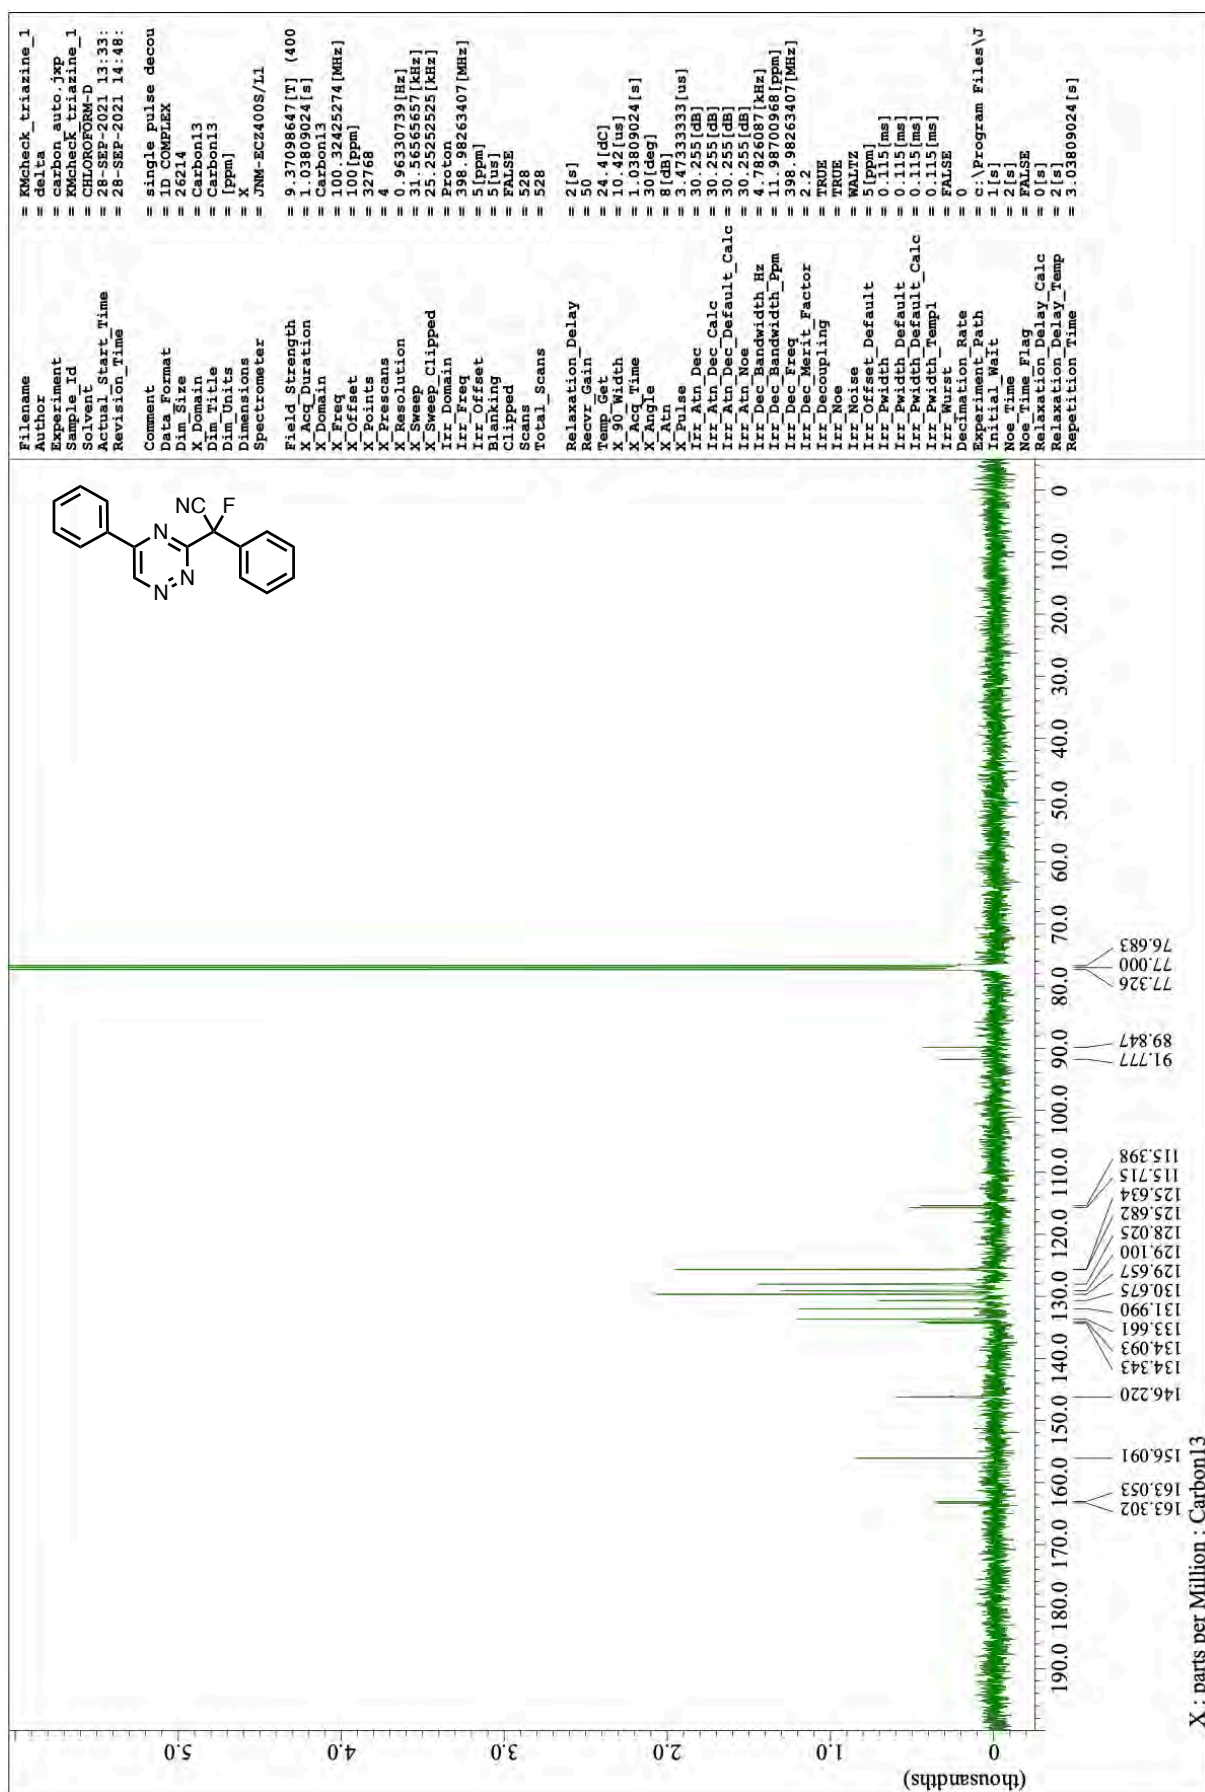

<sup>19</sup>F NMR of 2AO (376 MHz, CDCl<sub>3</sub>)

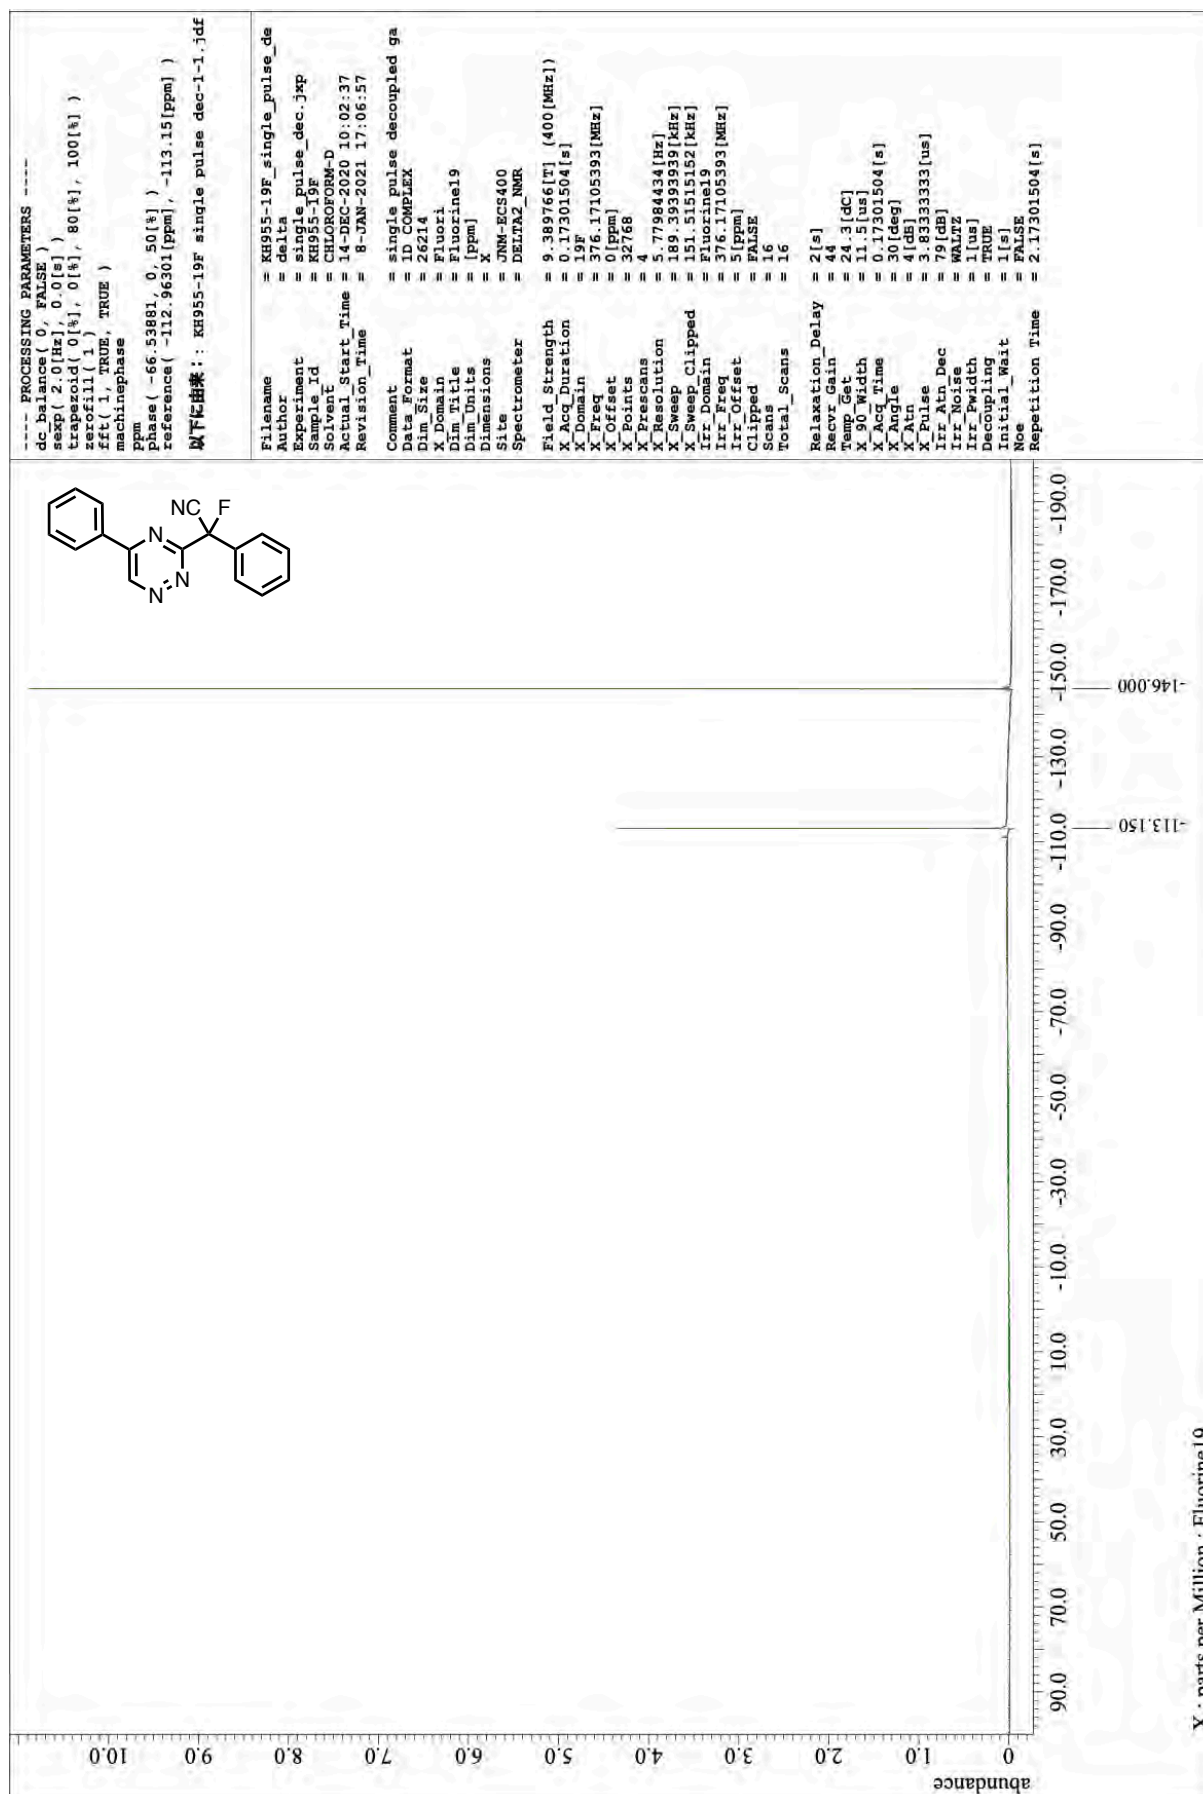

<sup>1</sup>H NMR of 2AP (400 MHz, CDCl<sub>3</sub>)

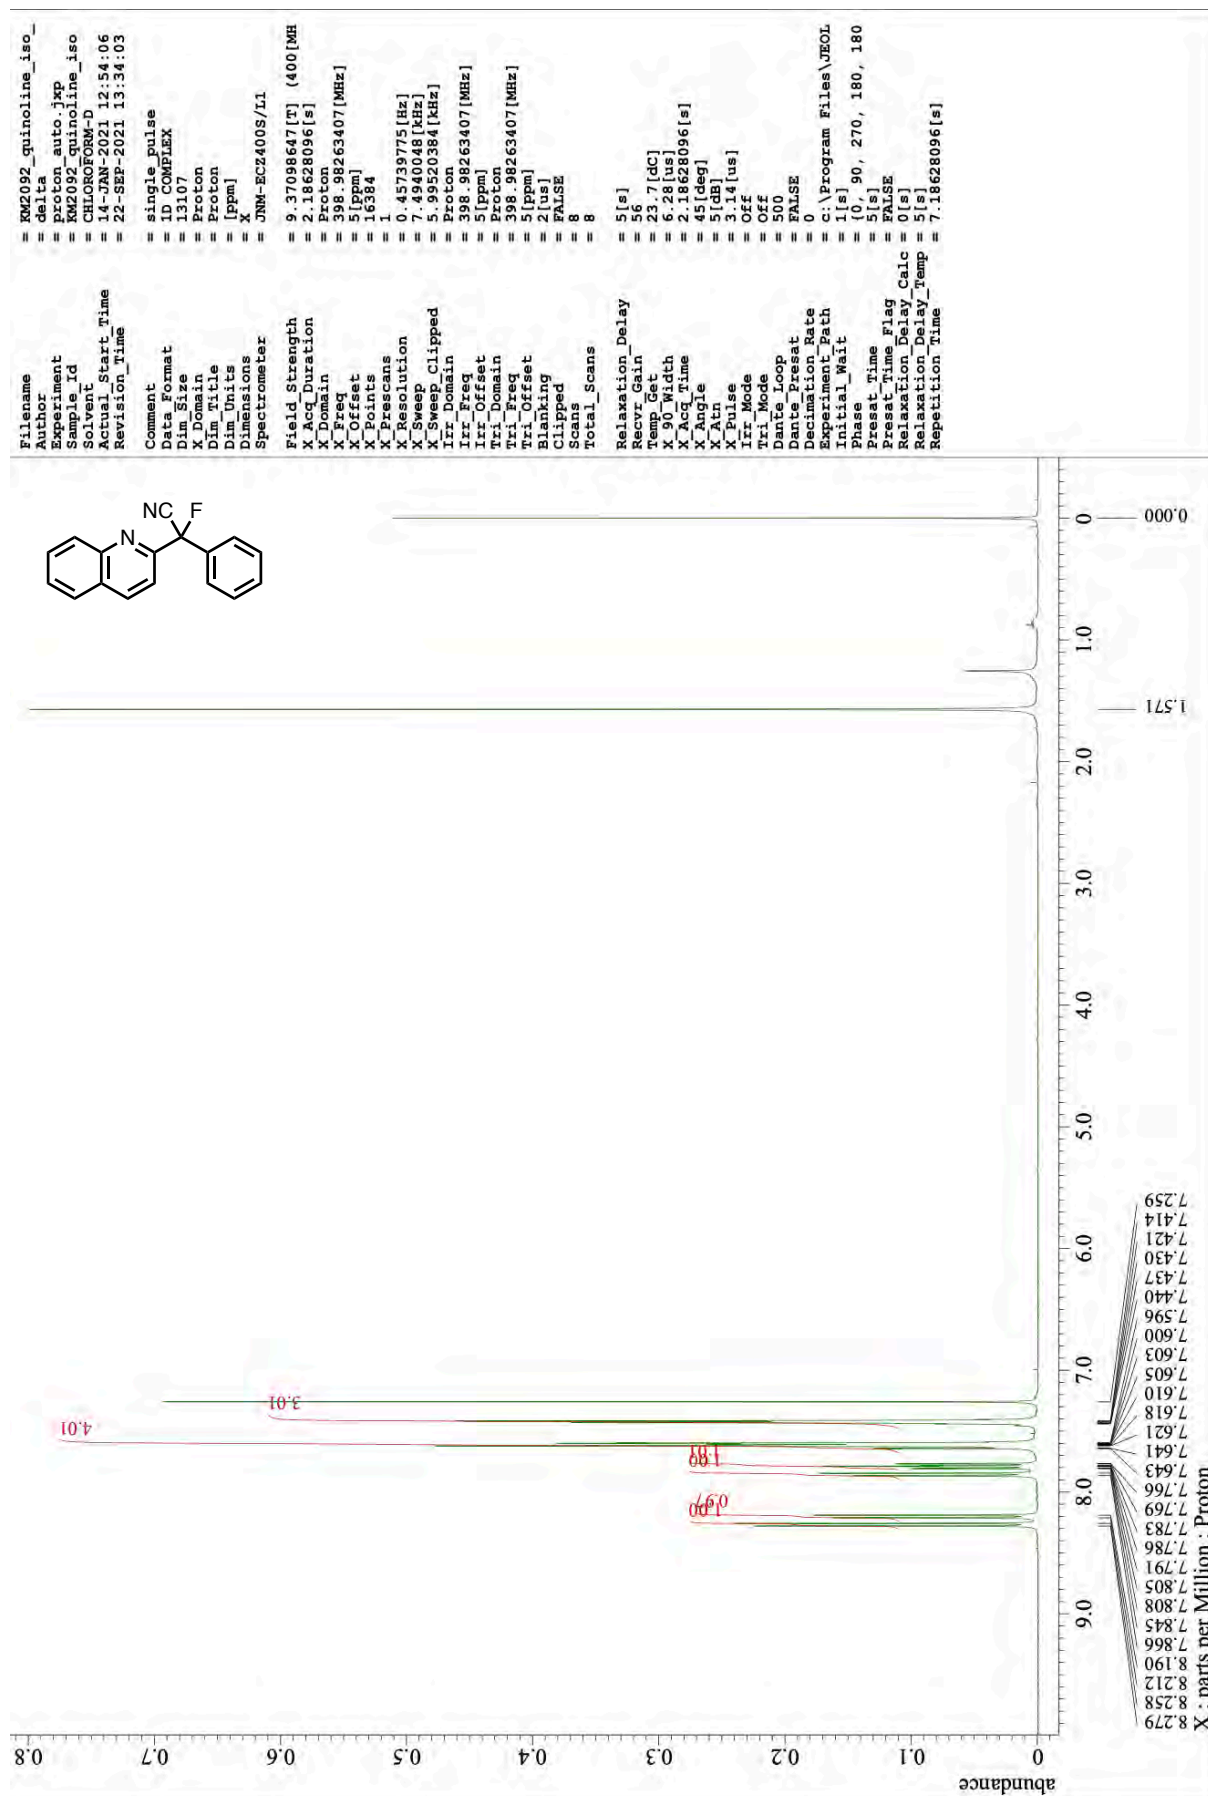

<sup>13</sup>C NMR of 2AP (101 MHz, CDCl<sub>3</sub>)

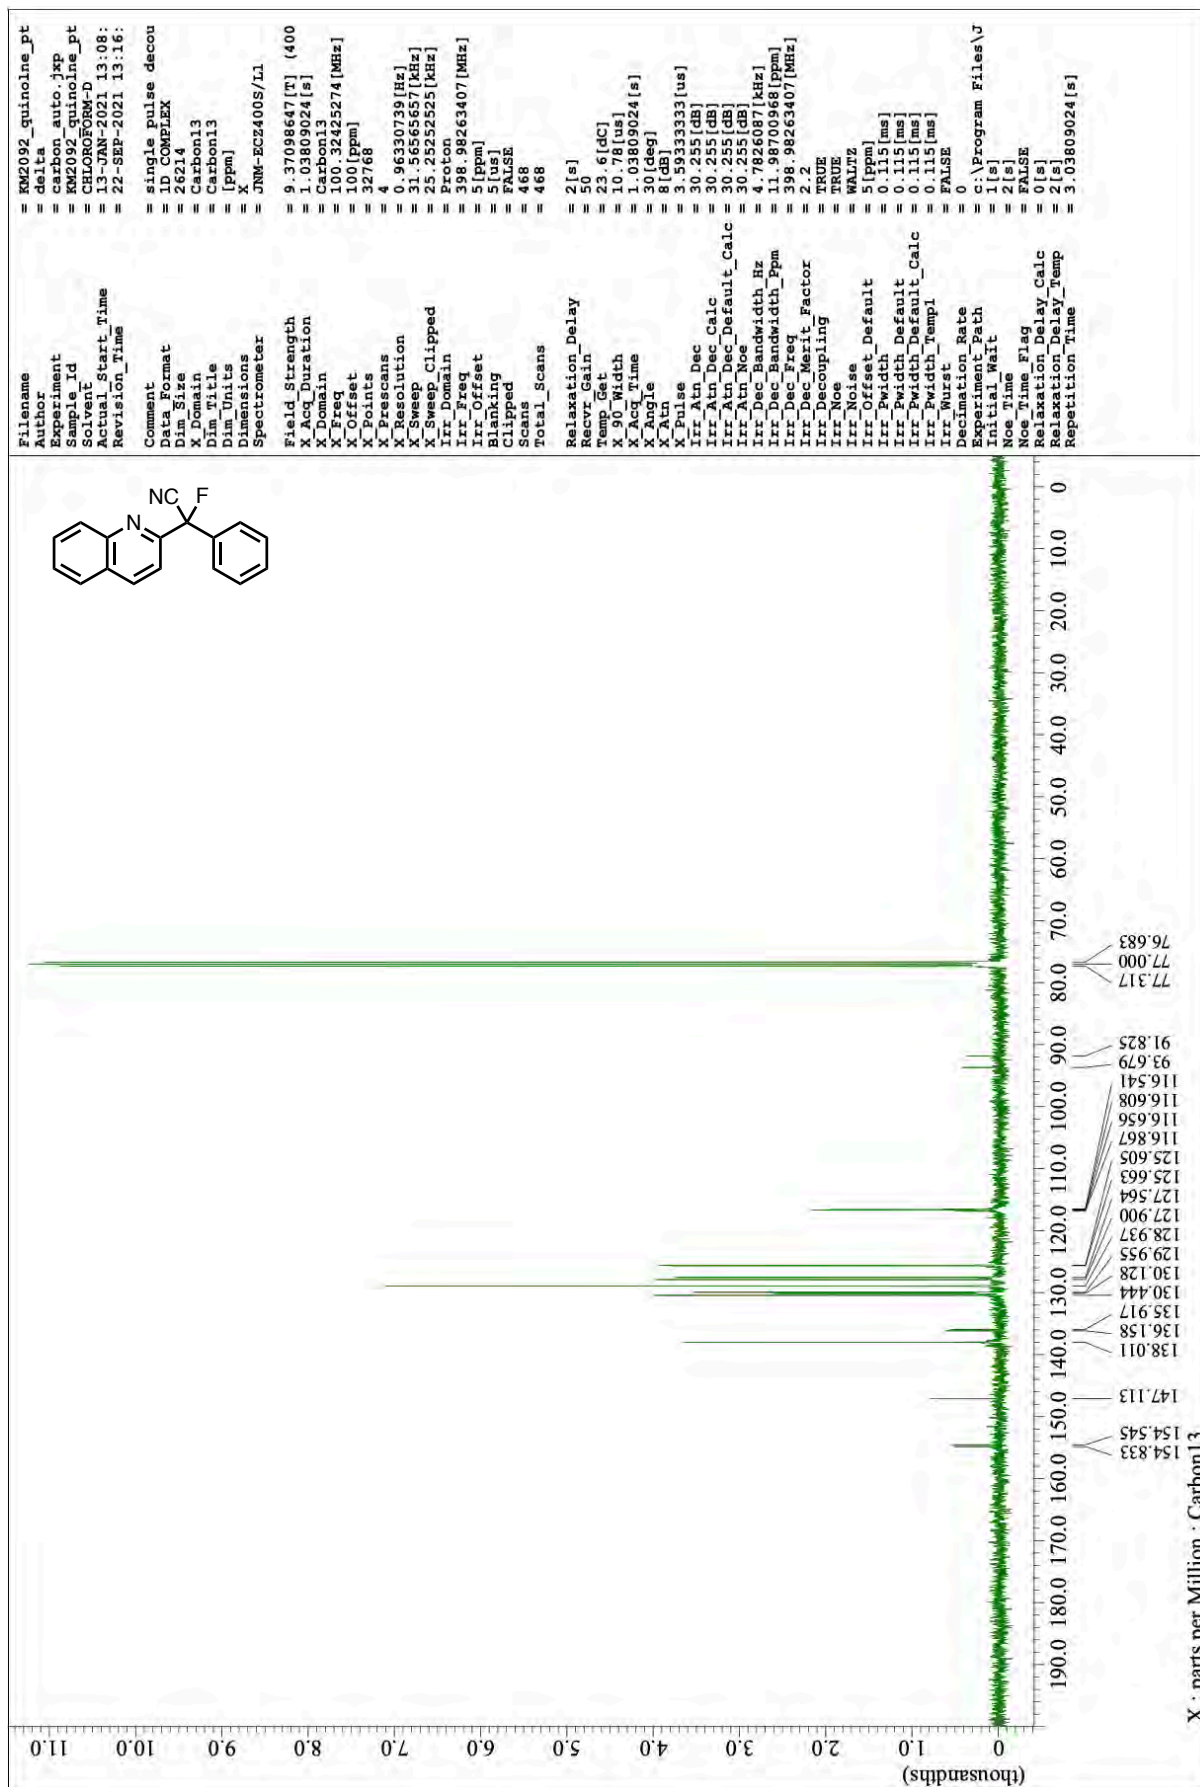

<sup>19</sup>F NMR of 2AP (376 MHz, CDCl<sub>3</sub>)

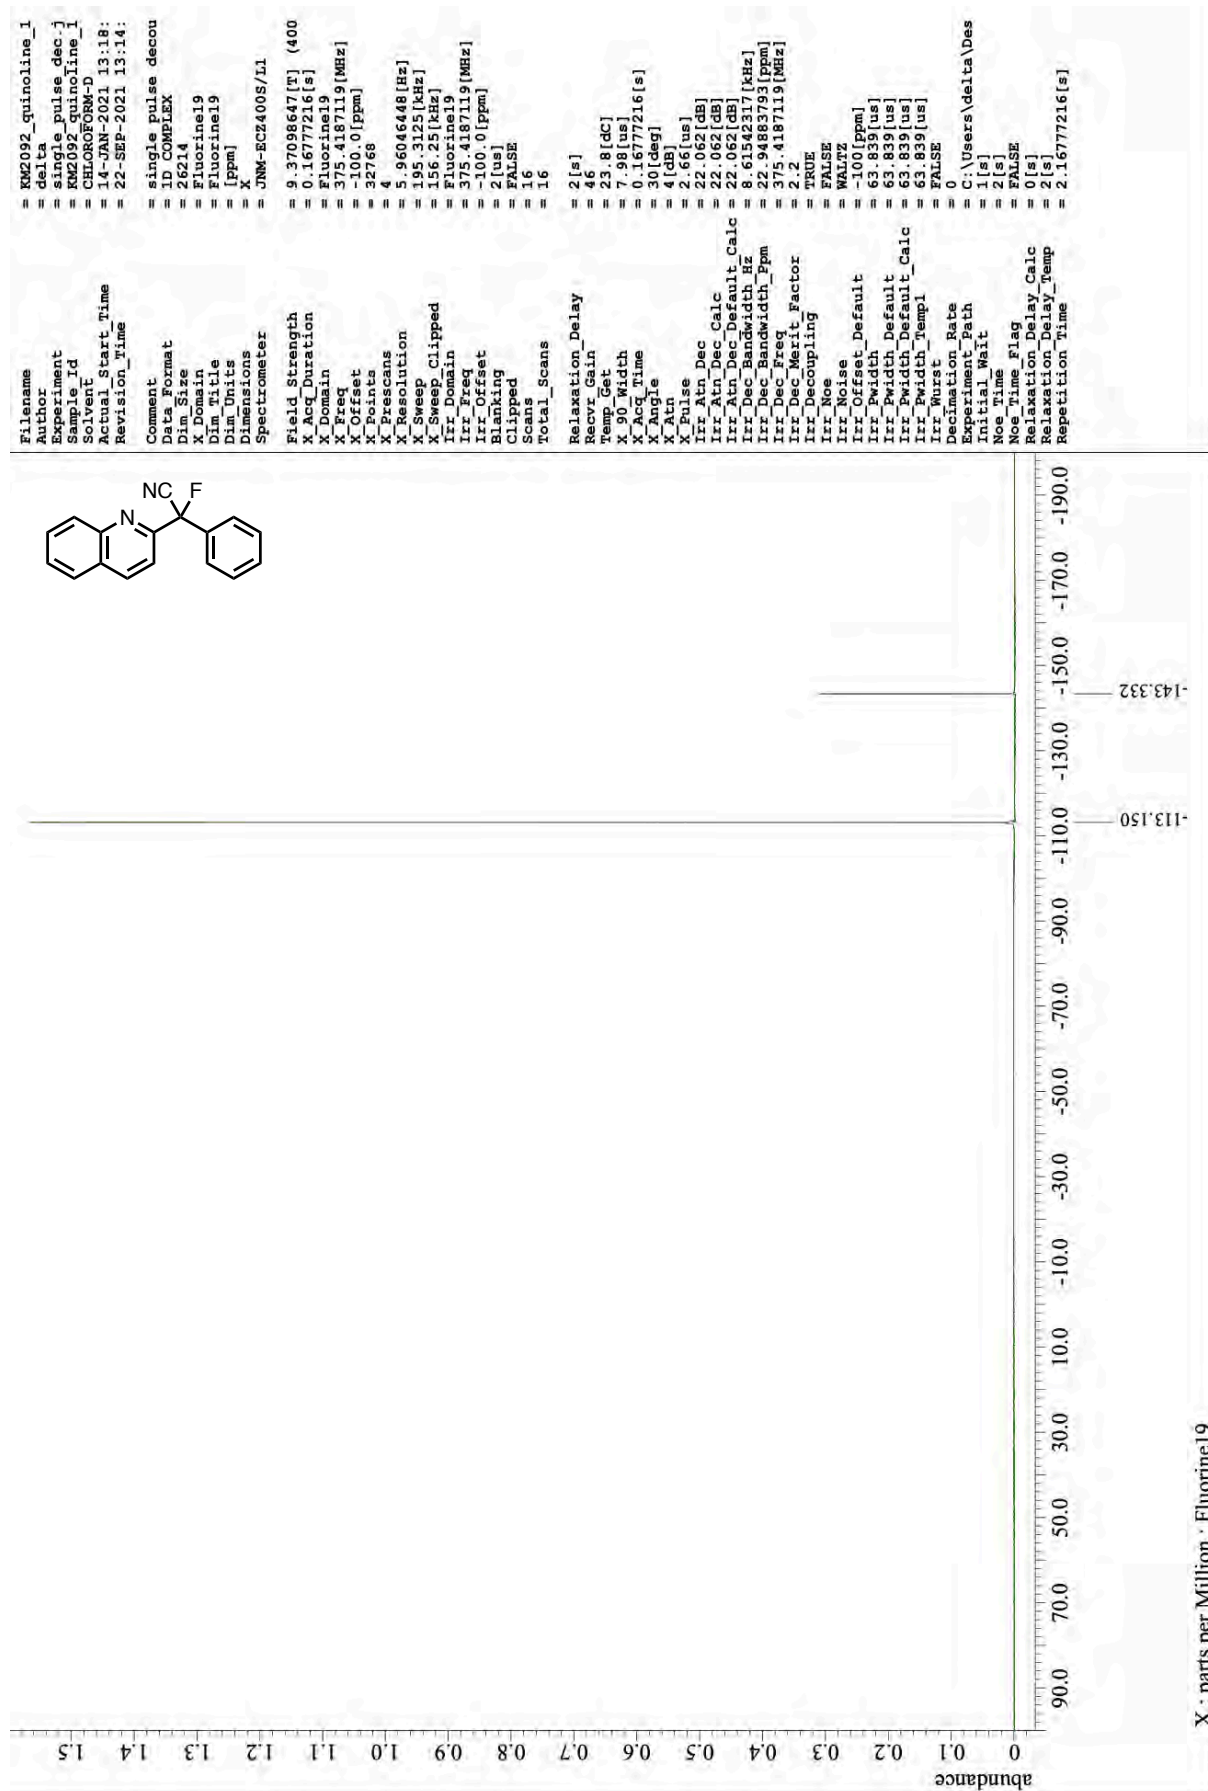

<sup>1</sup>H NMR of 2AQ (400 MHz, CDCl<sub>3</sub>)

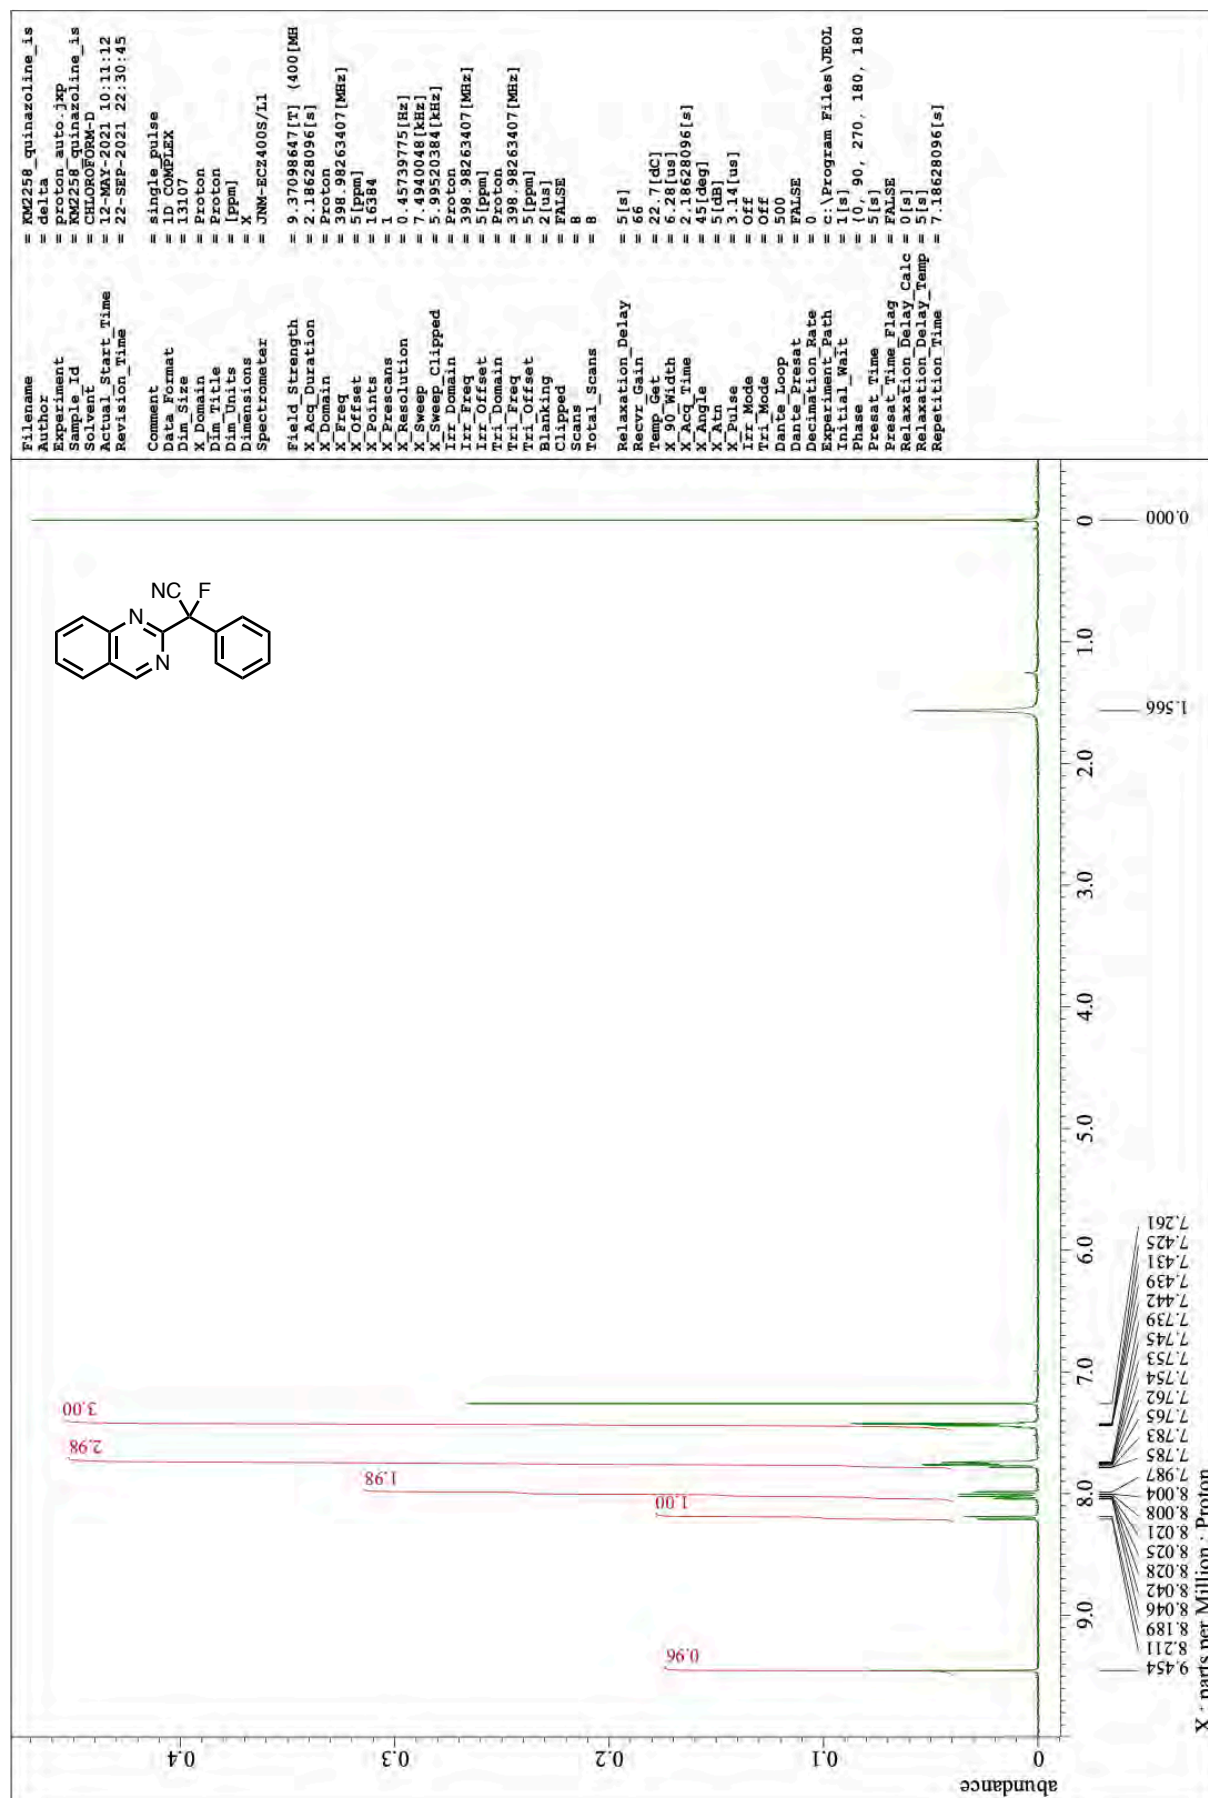



<sup>13</sup>C NMR of 2AQ (101 MHz, CDCl<sub>3</sub>)

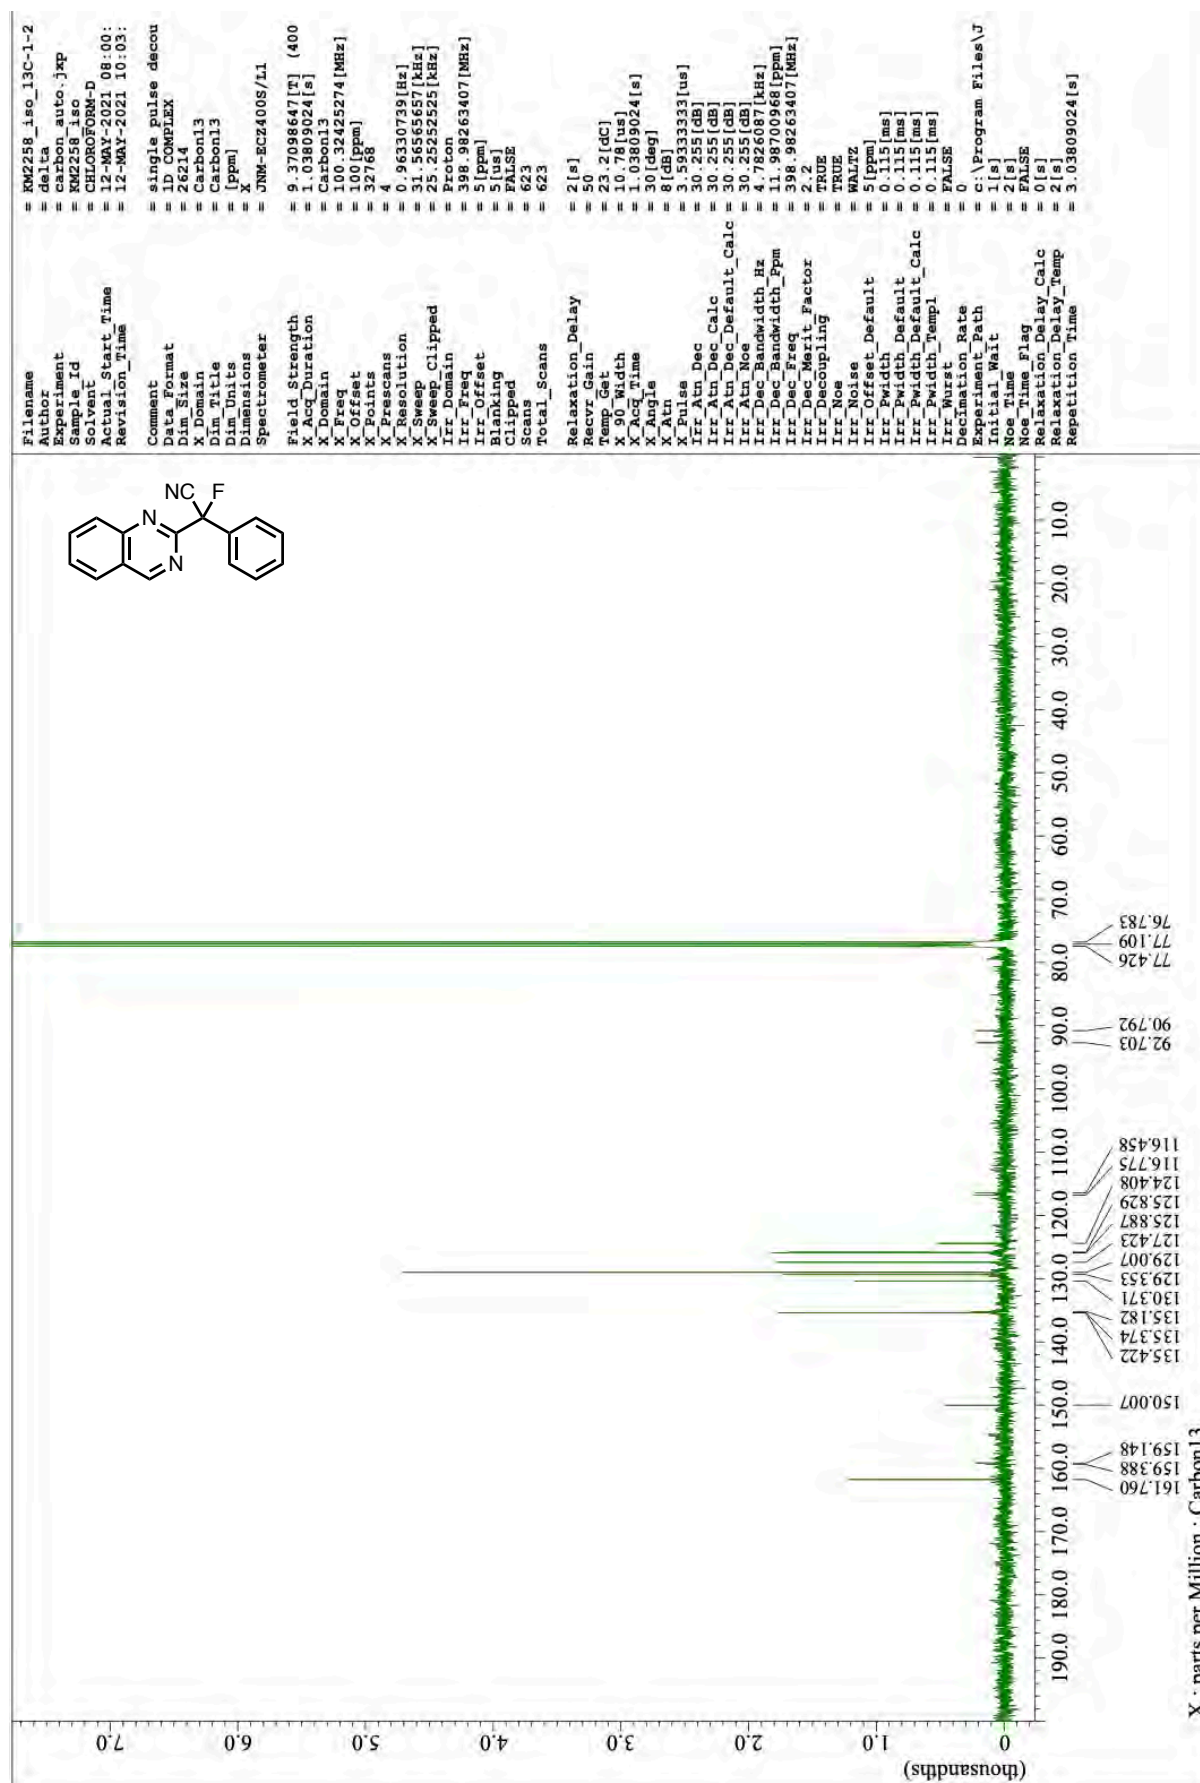

<sup>19</sup>F NMR of 2AQ (376 MHz, CDCl<sub>3</sub>)

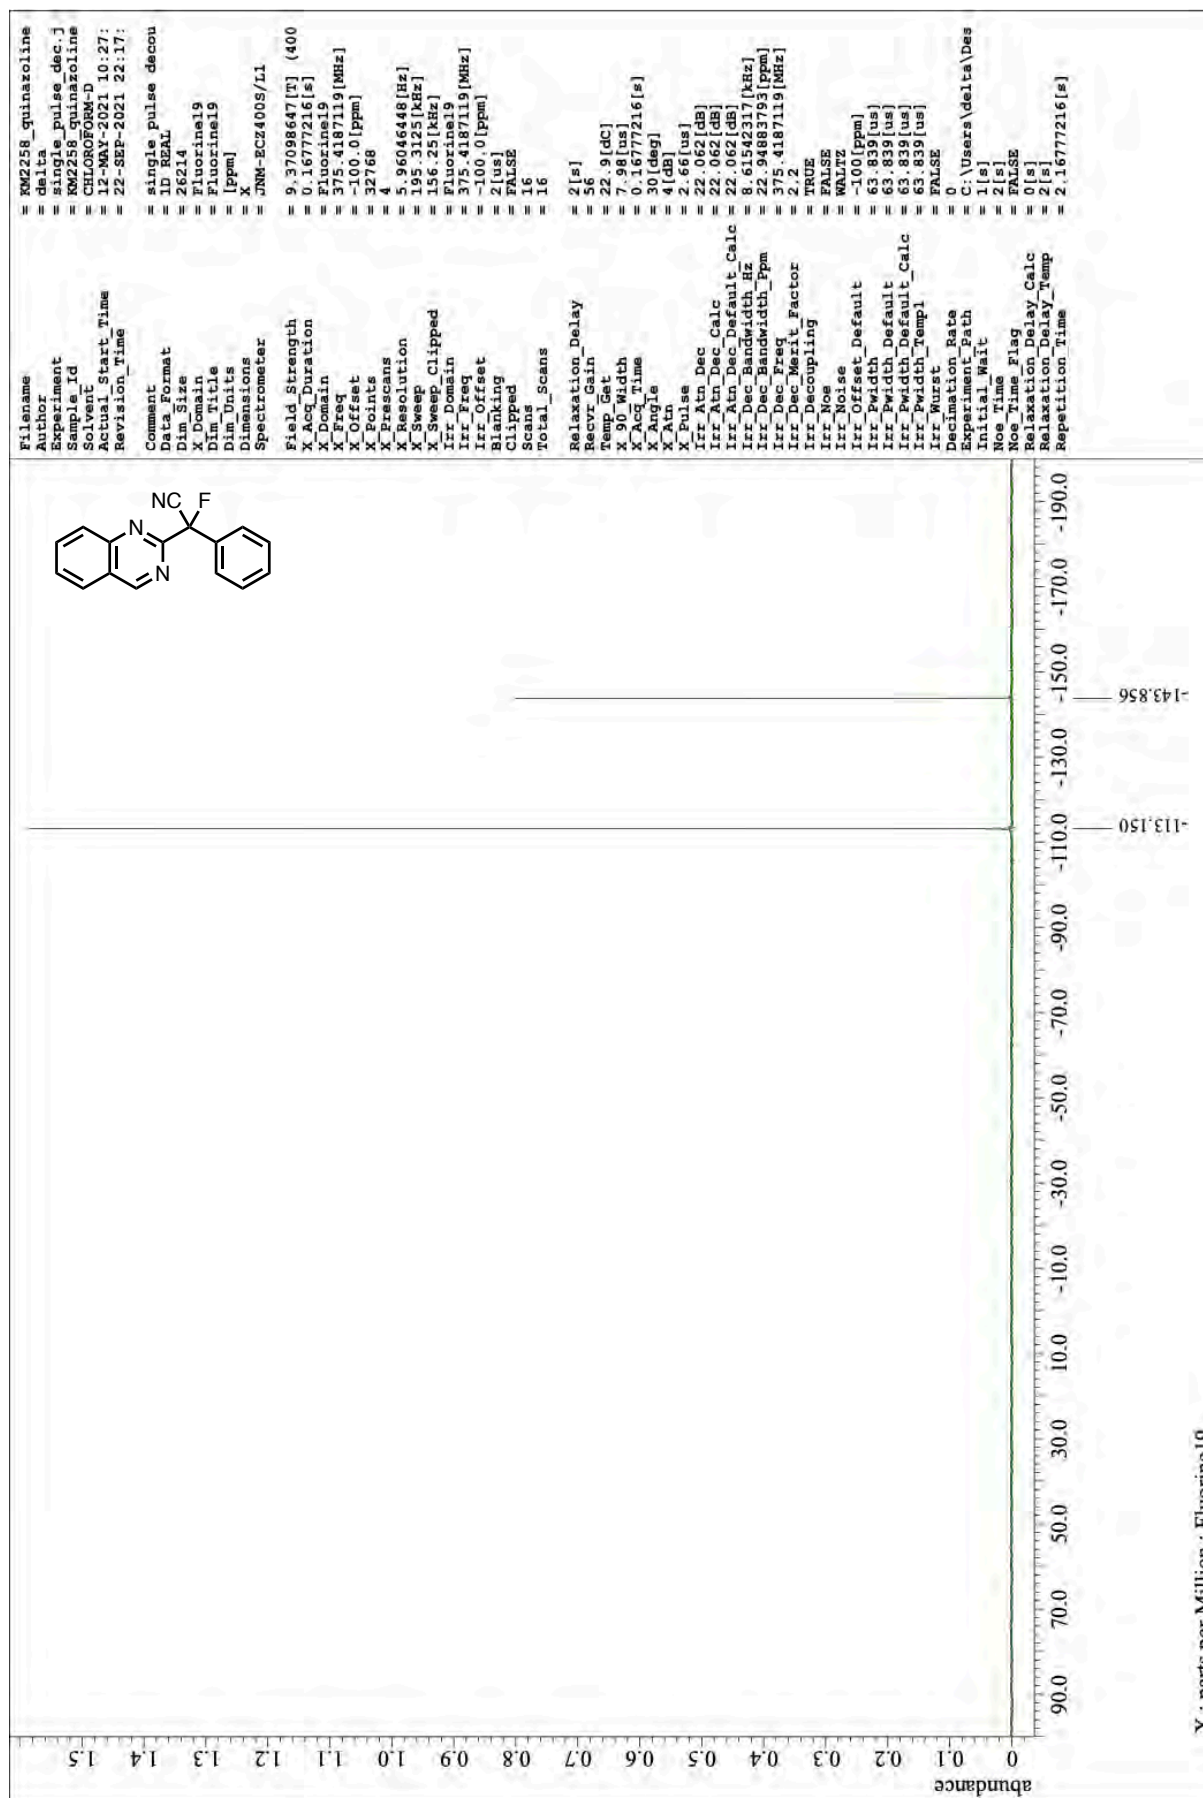

X : parts per Million : Fluorine19

<sup>1</sup>H NMR of **6** (400 MHz, acetonitrile-d<sub>3</sub>)

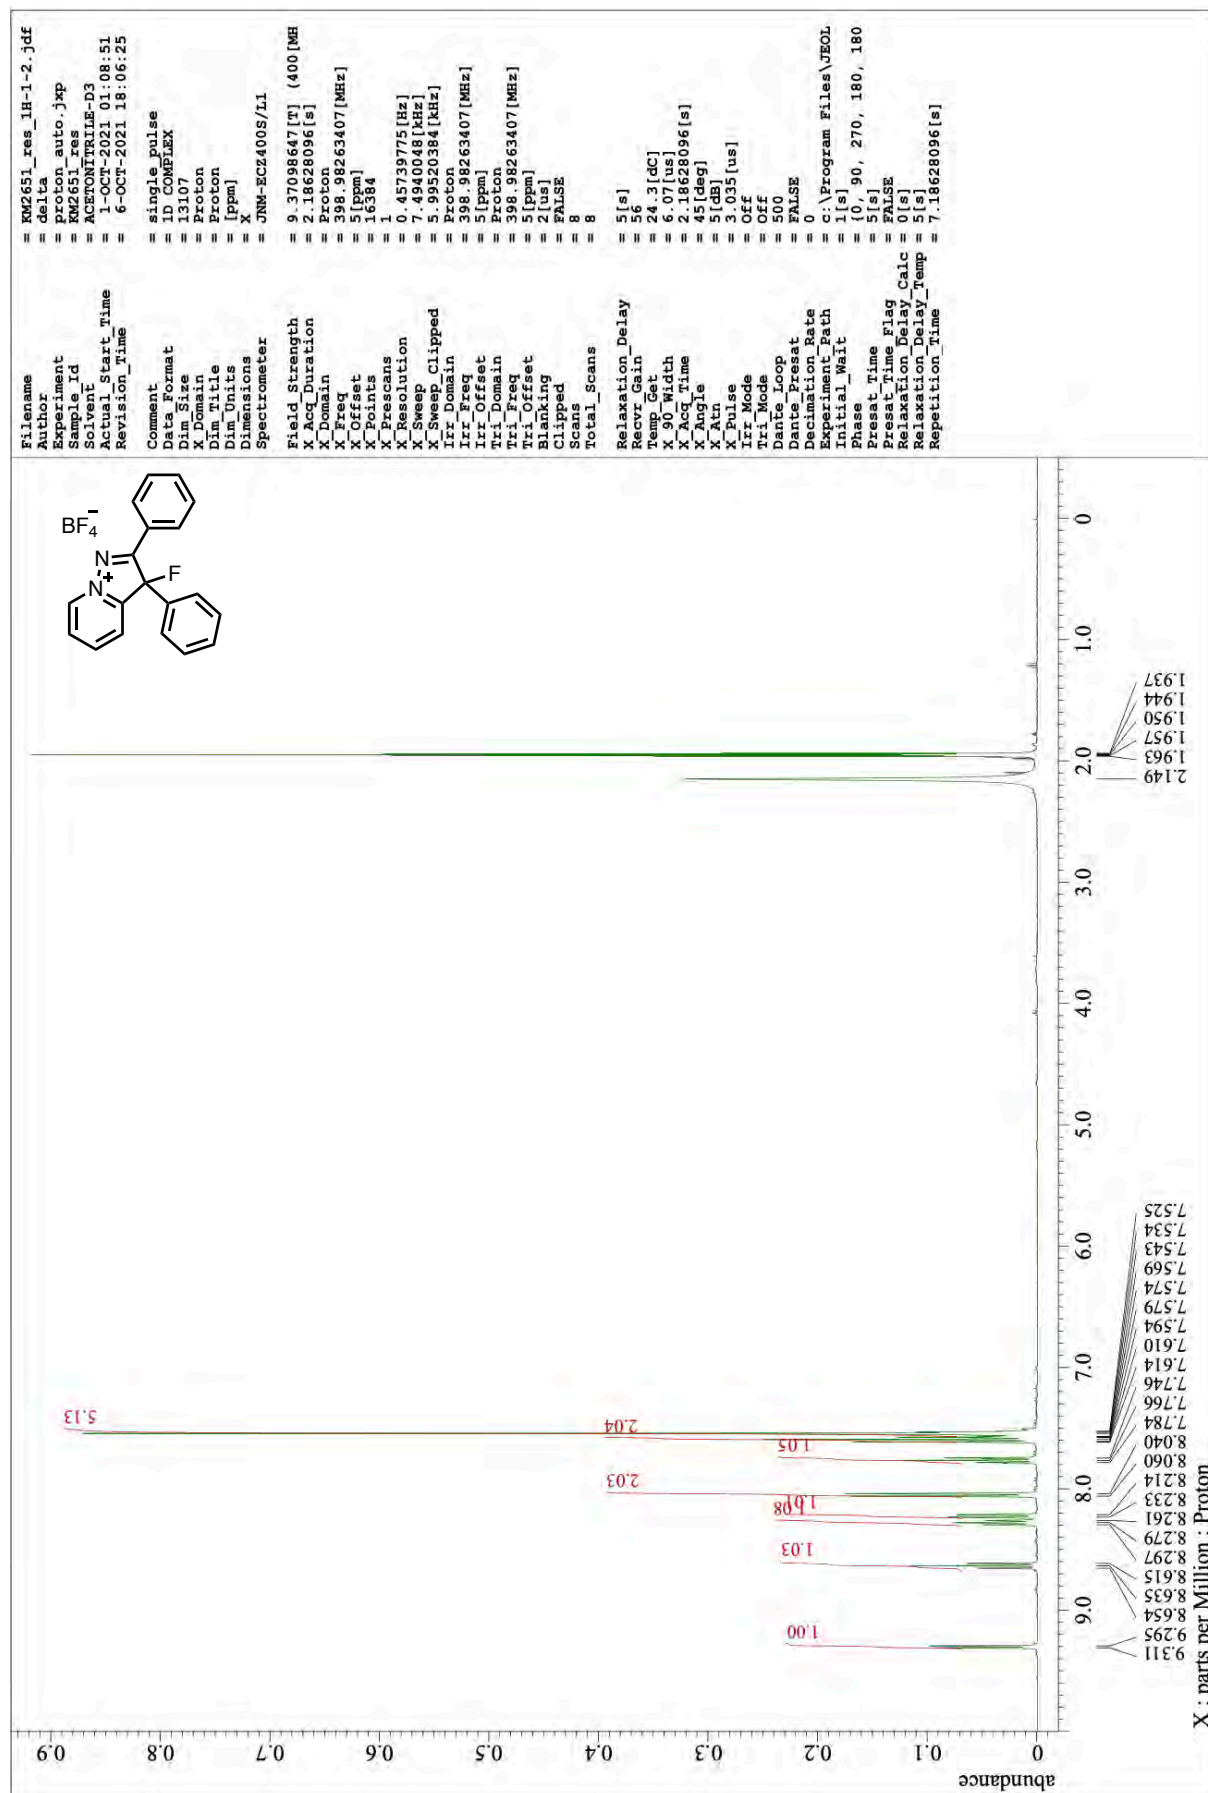

<sup>13</sup>C NMR of 6 (101 MHz, acetonitrile-d<sub>3</sub>)

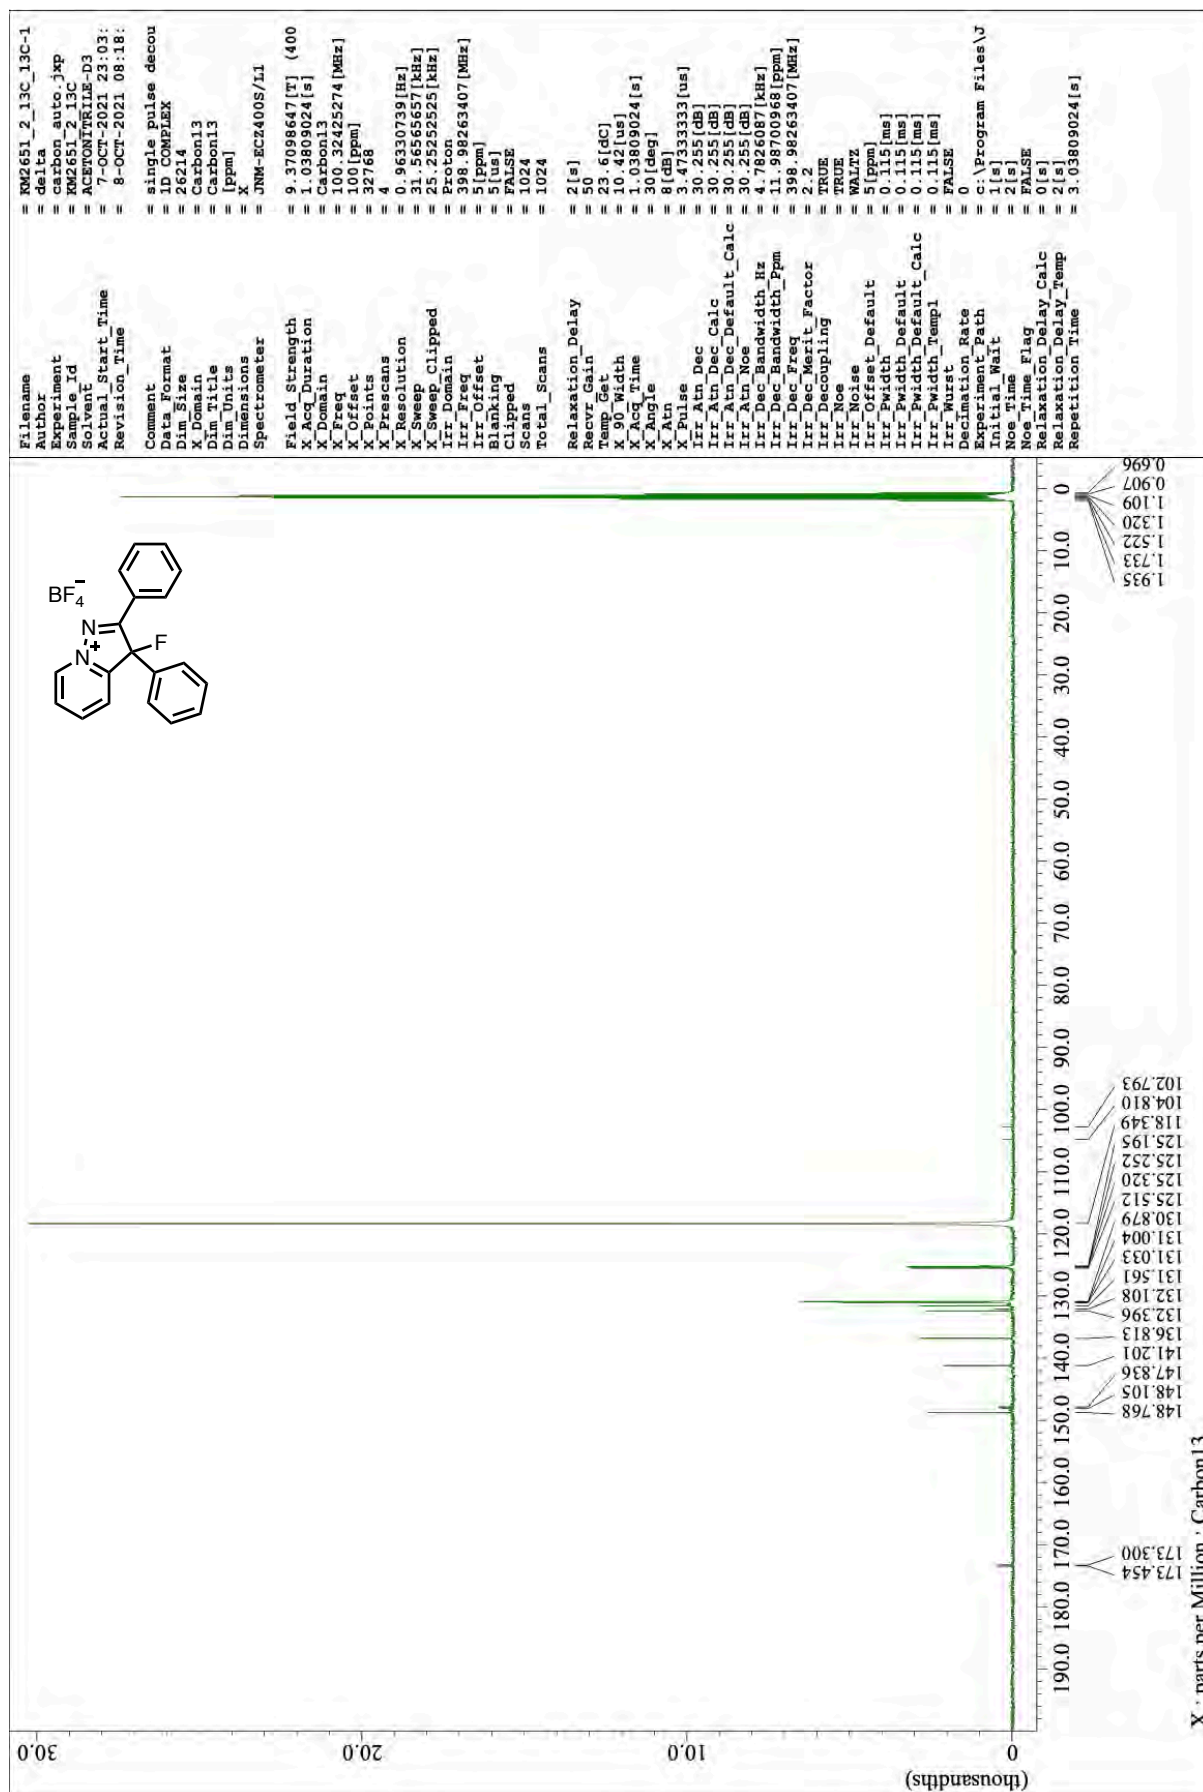

<sup>19</sup>F NMR of **6** (376 MHz, acetonitrile-*d*<sub>3</sub>)

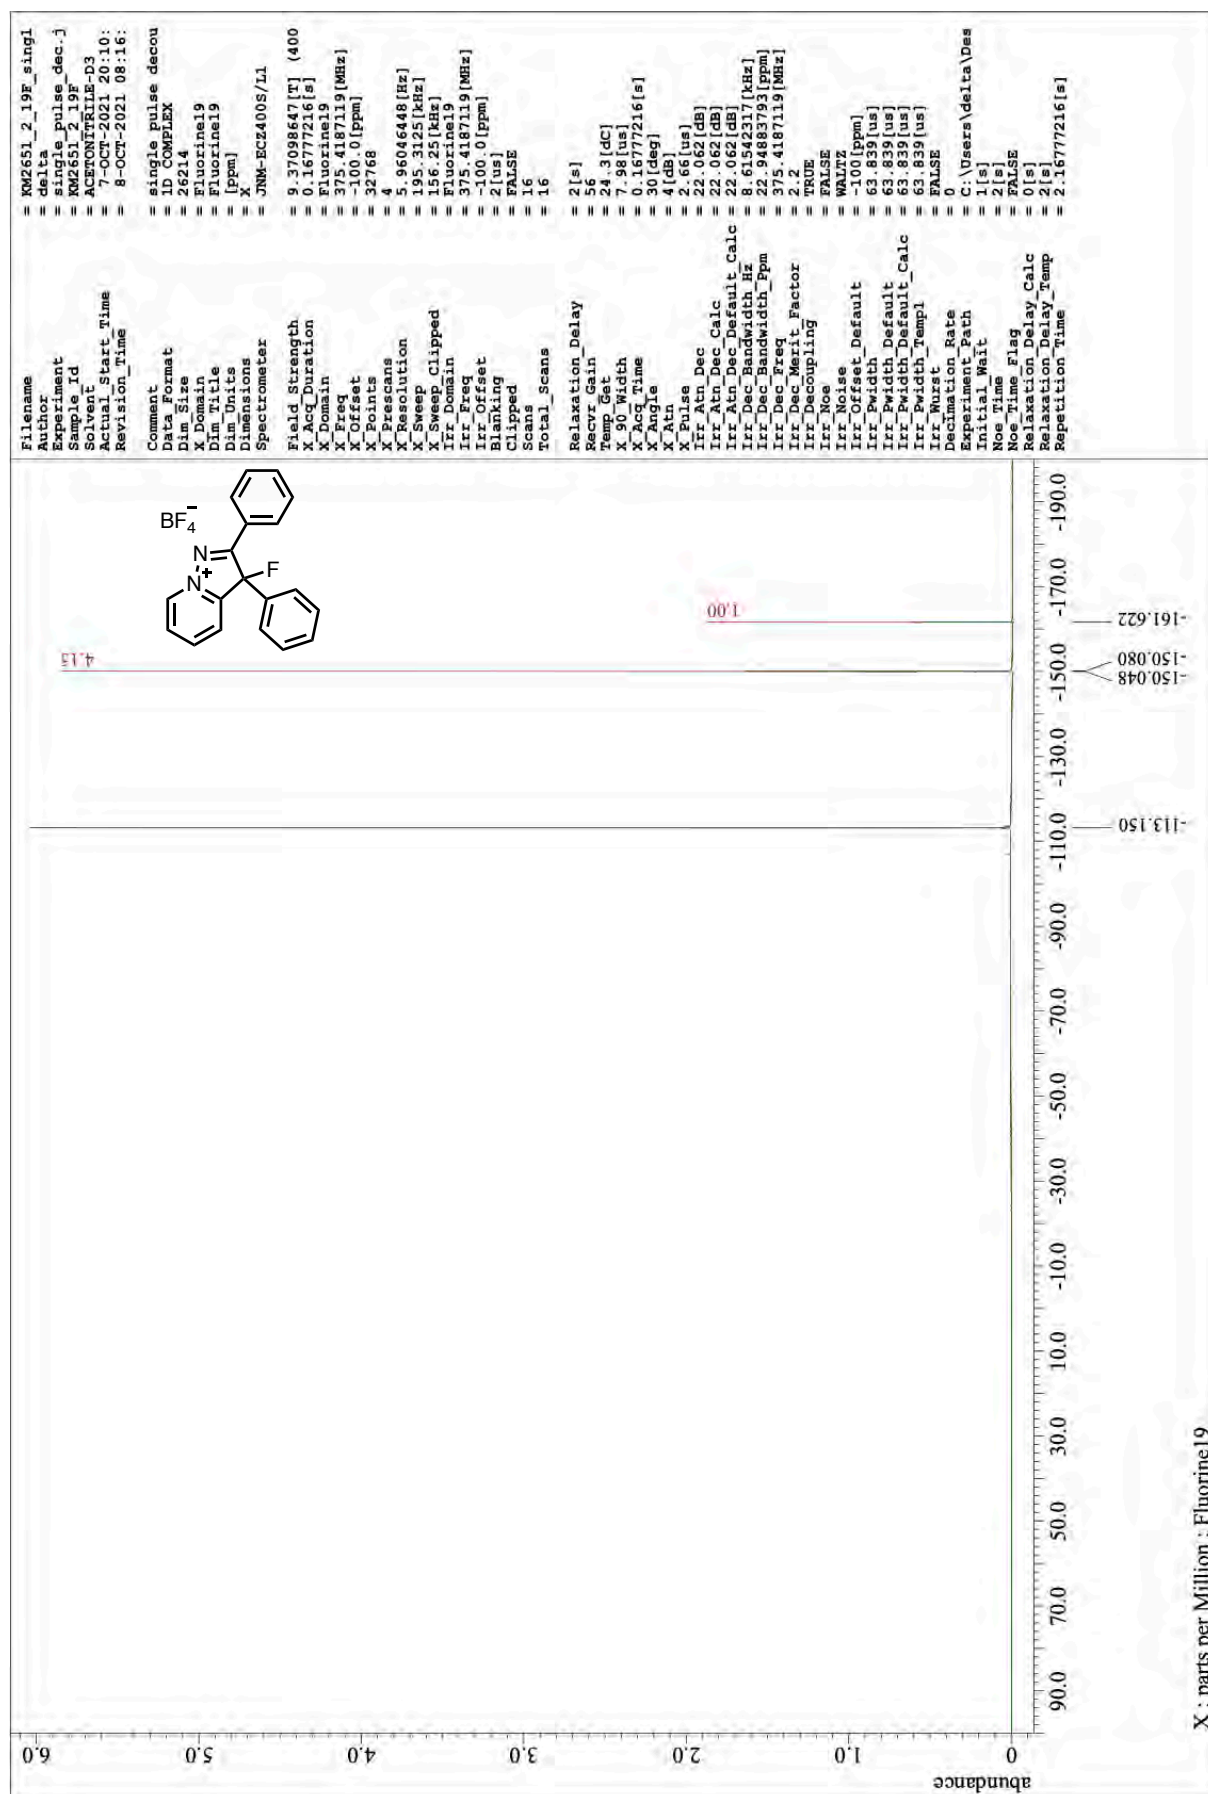

<sup>1</sup>H NMR of **8** (400 MHz, CDCl<sub>3</sub>)

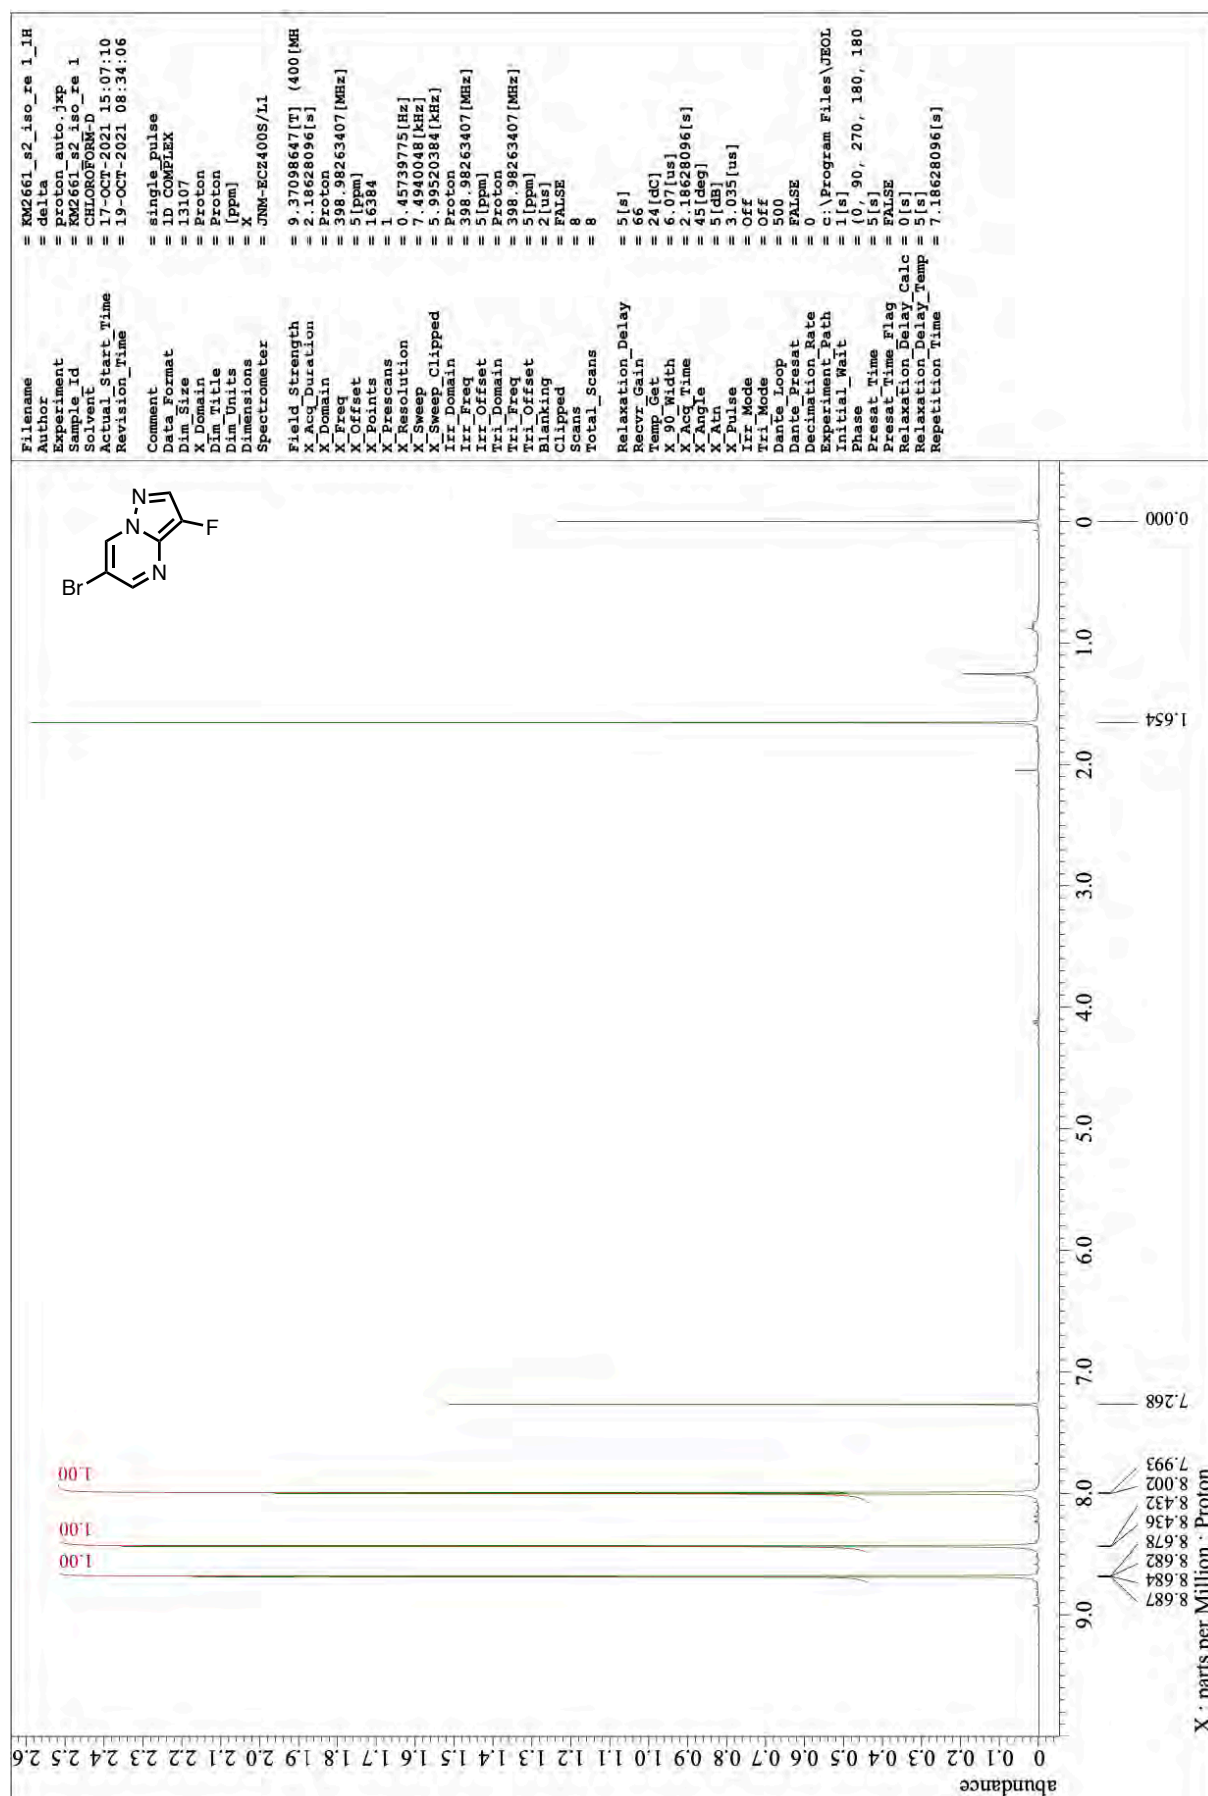

<sup>13</sup>C NMR of **8** (101 MHz, CDCl<sub>3</sub>)

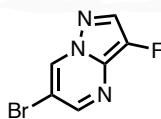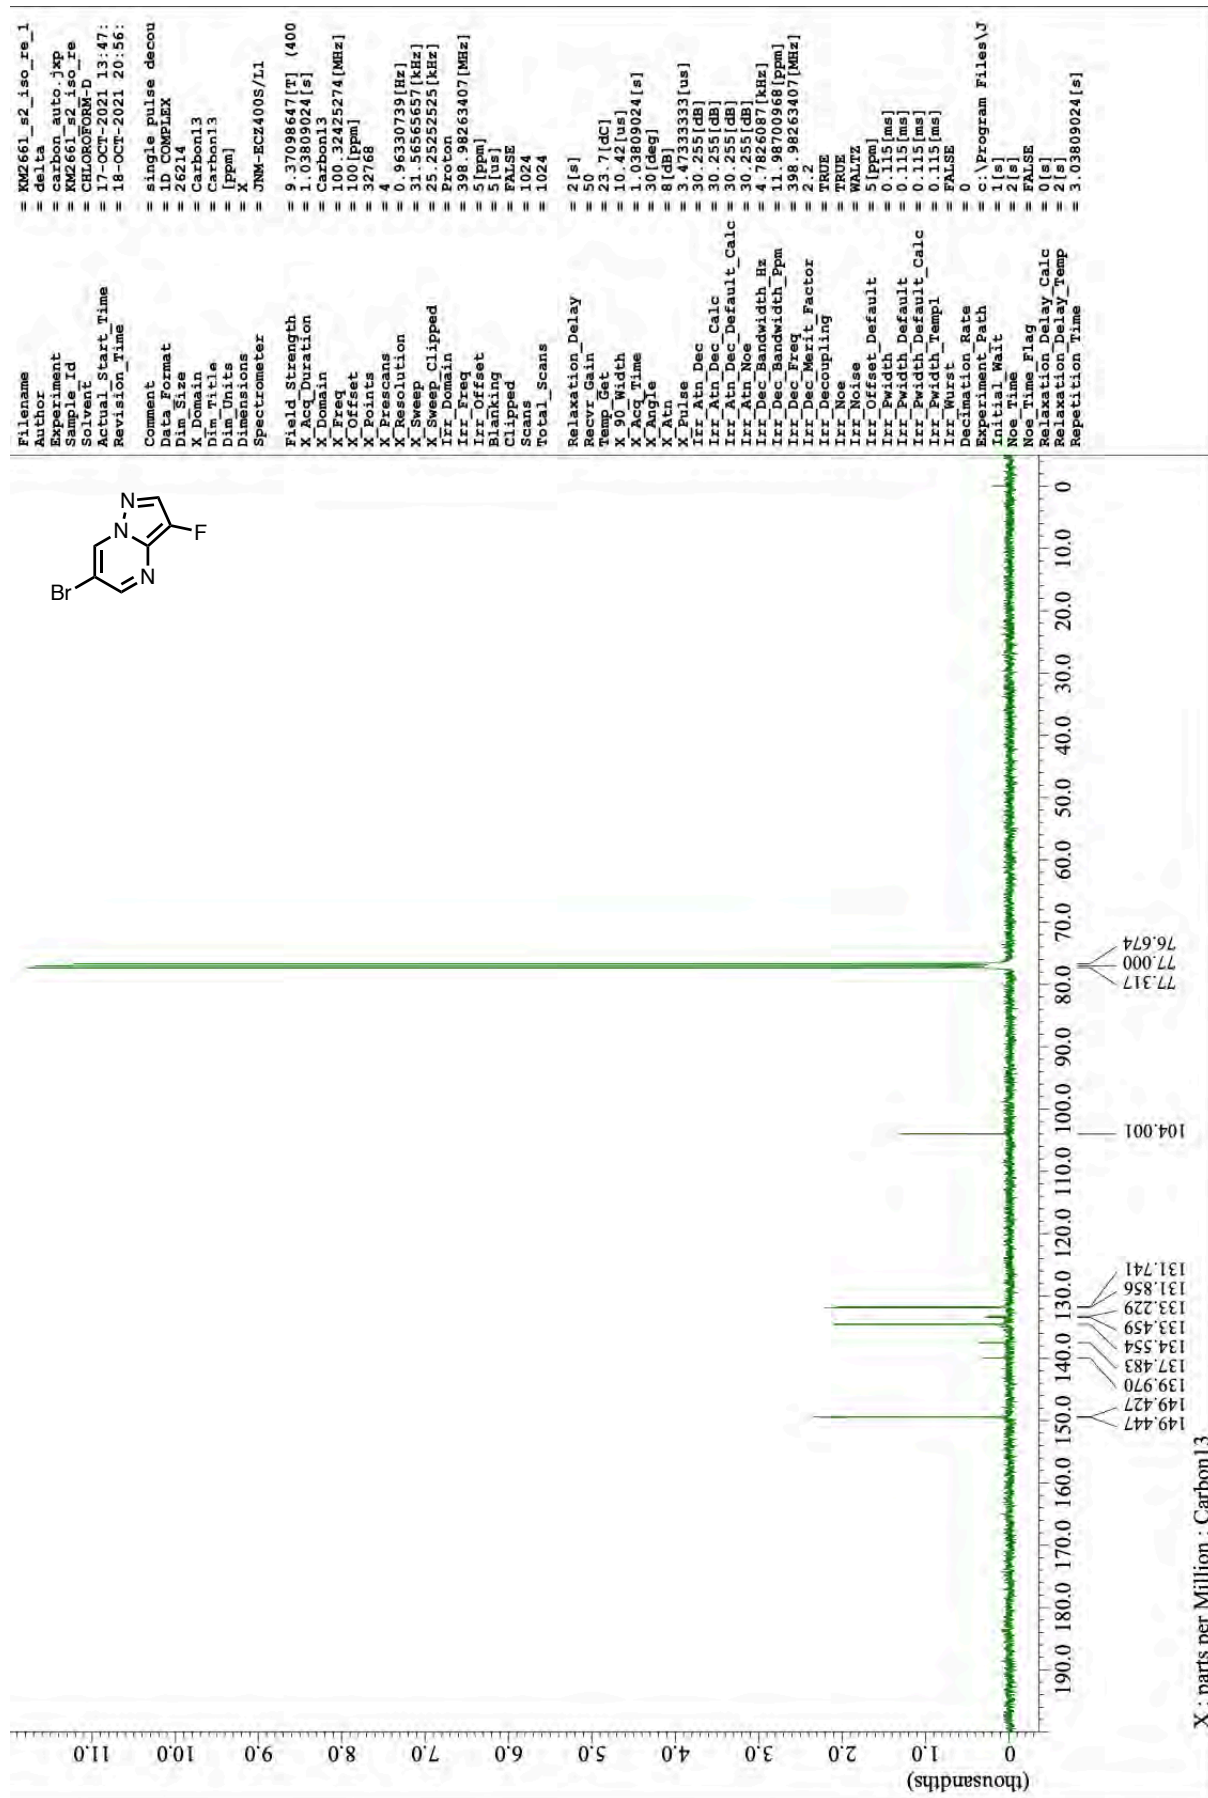

```

=====
File Name      = KM2661_s2_iso_re_1
Author        =
Experiment    = carbon auto jxp
Sample Id     = KM2661_s2_iso_re
Solvent       = CHLOROFORM-D
Actual Start Time = 17-OCT-2021 13:47:
Revision Time = 18-OCT-2021 20:56:
=====
Comment       = single pulse decou
Data Format    = 1D COMPLEX
Dim Size      = 26214
X Domain     = Carbon13
Dim Title    = Carbon13
Dim Units    = [ppm]
Dimensions   = X
Spectrometer = JNM-ECZ400S/L1
=====
Field Strength = 9.37098647[T] (400
X Acq Duration = 1.03809024[s]
X Domain      = Carbon13
X Freq       = 100.32425274[MHz]
X Offset     = 100[ppm]
X Points     = 32768
X Fscans    = 4
X Resolution = 0.96330739[Hz]
X Sweep     = 31.56565657[kHz]
X Sweep Clipped = 25.25252525[kHz]
X Domain    = Proton
Irr Freq    = 398.98263407[MHz]
Irr Offset  = 5[ppm]
Irr Dec     = 5[us]
Blanking    = FALSE
Clipped     =
Scans       = 1024
Total Scans = 1024
=====
Relaxation Delay = 2[s]
Recvr Gain      = 50
Temp Get       = 23.7[dc]
X 90 Width    = 10.42[us]
X Acq Time    = 1.03809024[s]
X Angle       = 30[deg]
X Atn         = 8[db]
X Pulse      = 3.47333333[us]
Irr Atn Dec  = 30.255[db]
Irr Atn Dec Calc = 30.255[db]
Irr Atn Dec Default Calc = 30.255[db]
Irr Atn Noe   = 30.255[db]
Irr Dec Bandwidth Hz = 4.7826087[kHz]
Irr Dec Bandwidth Ppm = 11.98700968[ppm]
Irr Dec Freq  = 398.98263407[MHz]
Irr Dec Merit Factor = 2.2
Irr Decoupling = TRUE
Irr Noe       = TRUE
Irr Noise     = WALTZ
Irr Offset Default = 5[ppm]
Irr Fwidth    = 0.115[ms]
Irr Fwidth Default = 0.115[ms]
Irr Fwidth Default Calc = 0.115[ms]
Irr Fwidth Temptl = 0.115[ms]
Irr Wurst     = FALSE
Decimation Rate = 0
Experiment Path = c:\Program Files\J
Initial Wait   = 1[s]
Noe Time      = 2[s]
Noe Time Flag = FALSE
Relaxation Delay Calc = 0[s]
Relaxation Delay Temp = 2[s]
Repetition Time = 3.03809024[s]
=====

```

<sup>19</sup>F NMR of **8** (376 MHz, CDCl<sub>3</sub>)

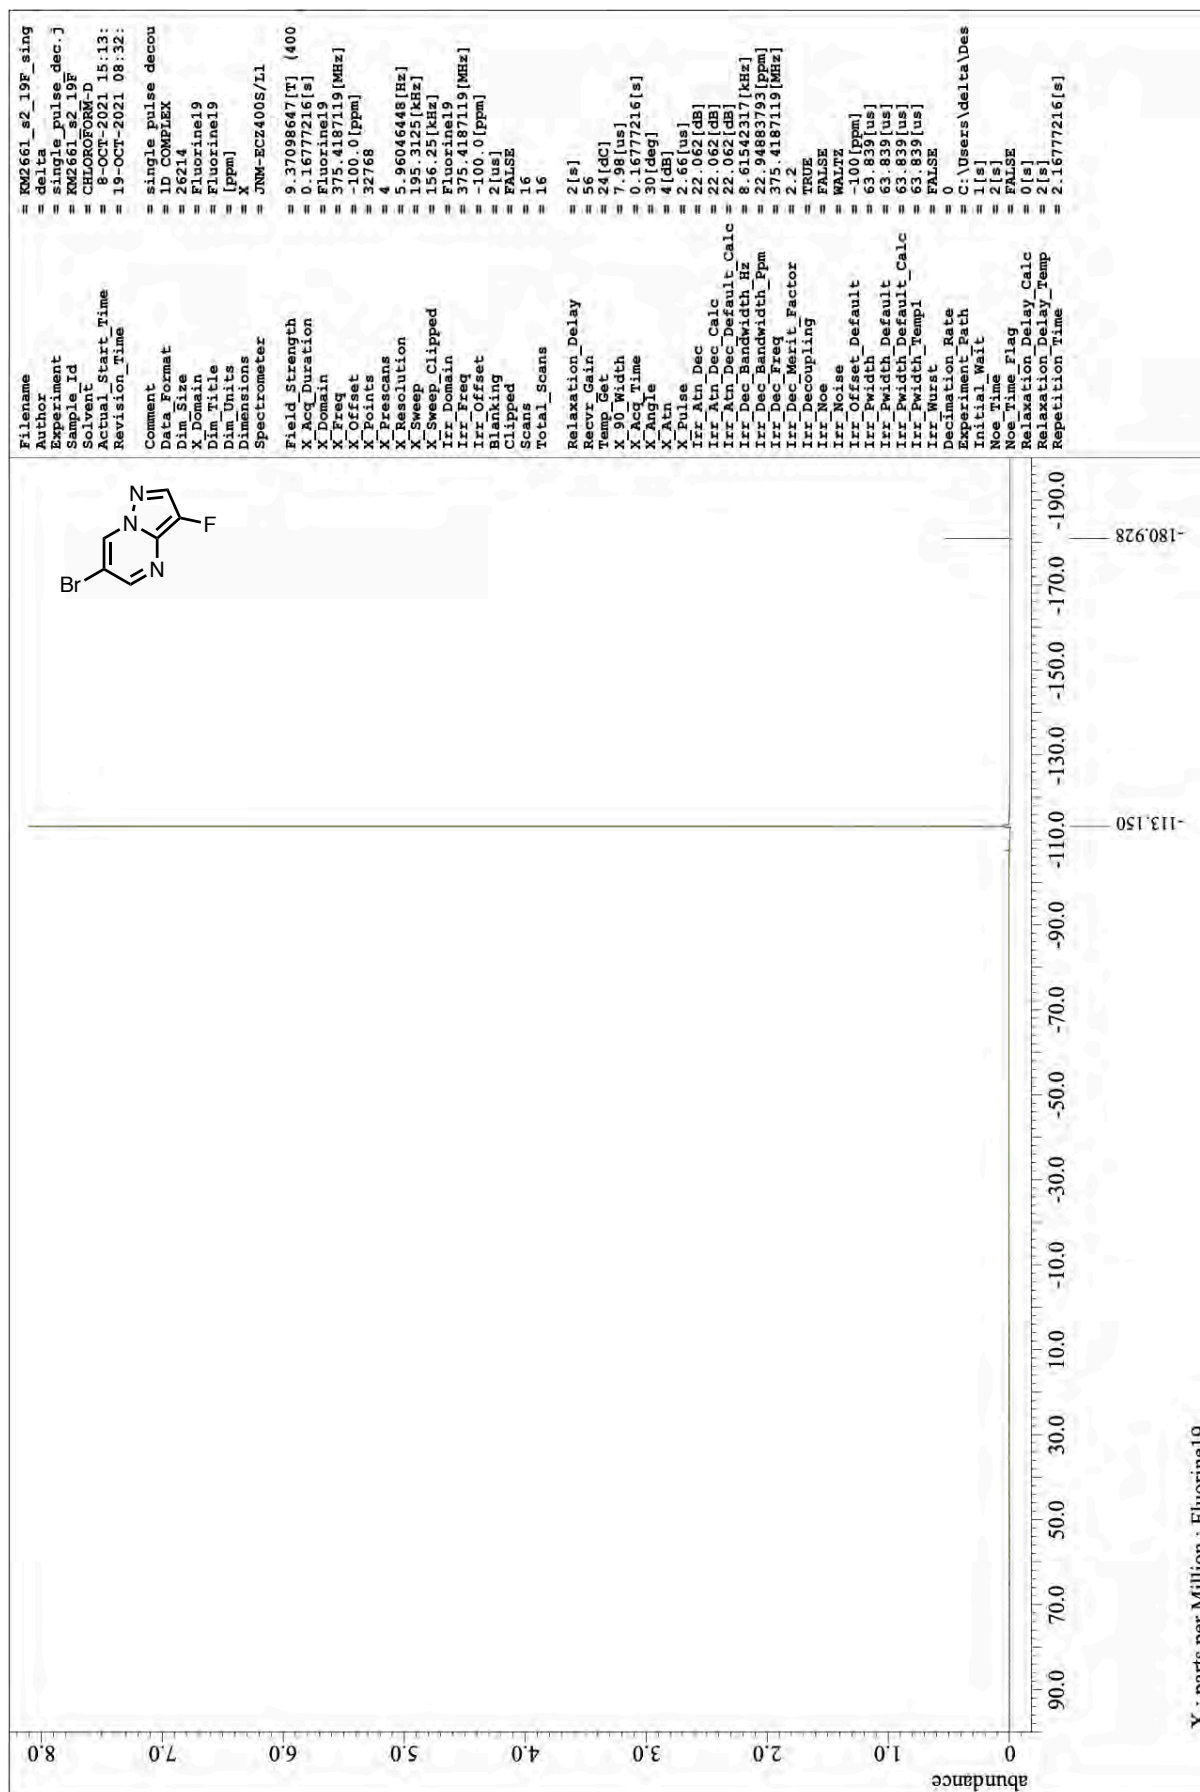



<sup>1</sup>H NMR of **9** (400 MHz, CDCl<sub>3</sub>)

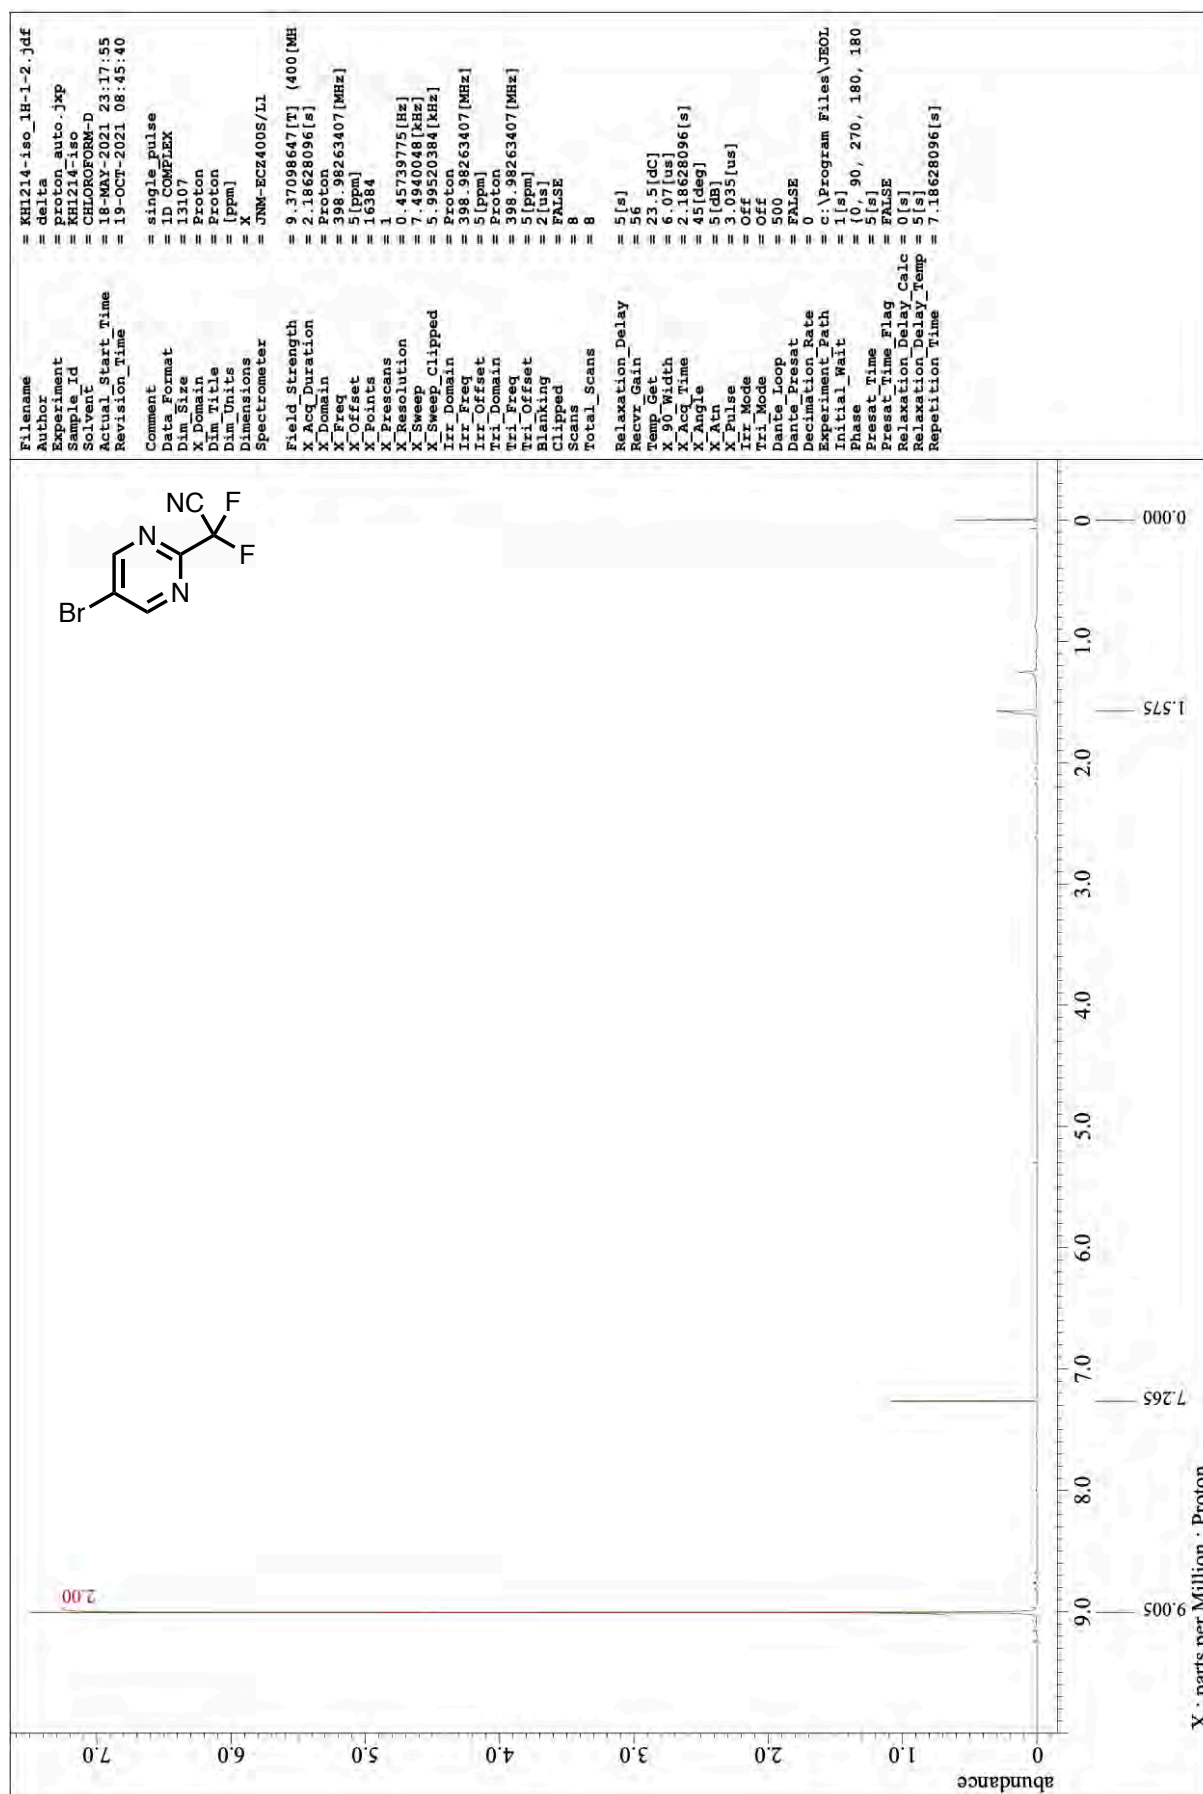

<sup>13</sup>C NMR of 9 (101 MHz, CDCl<sub>3</sub>)

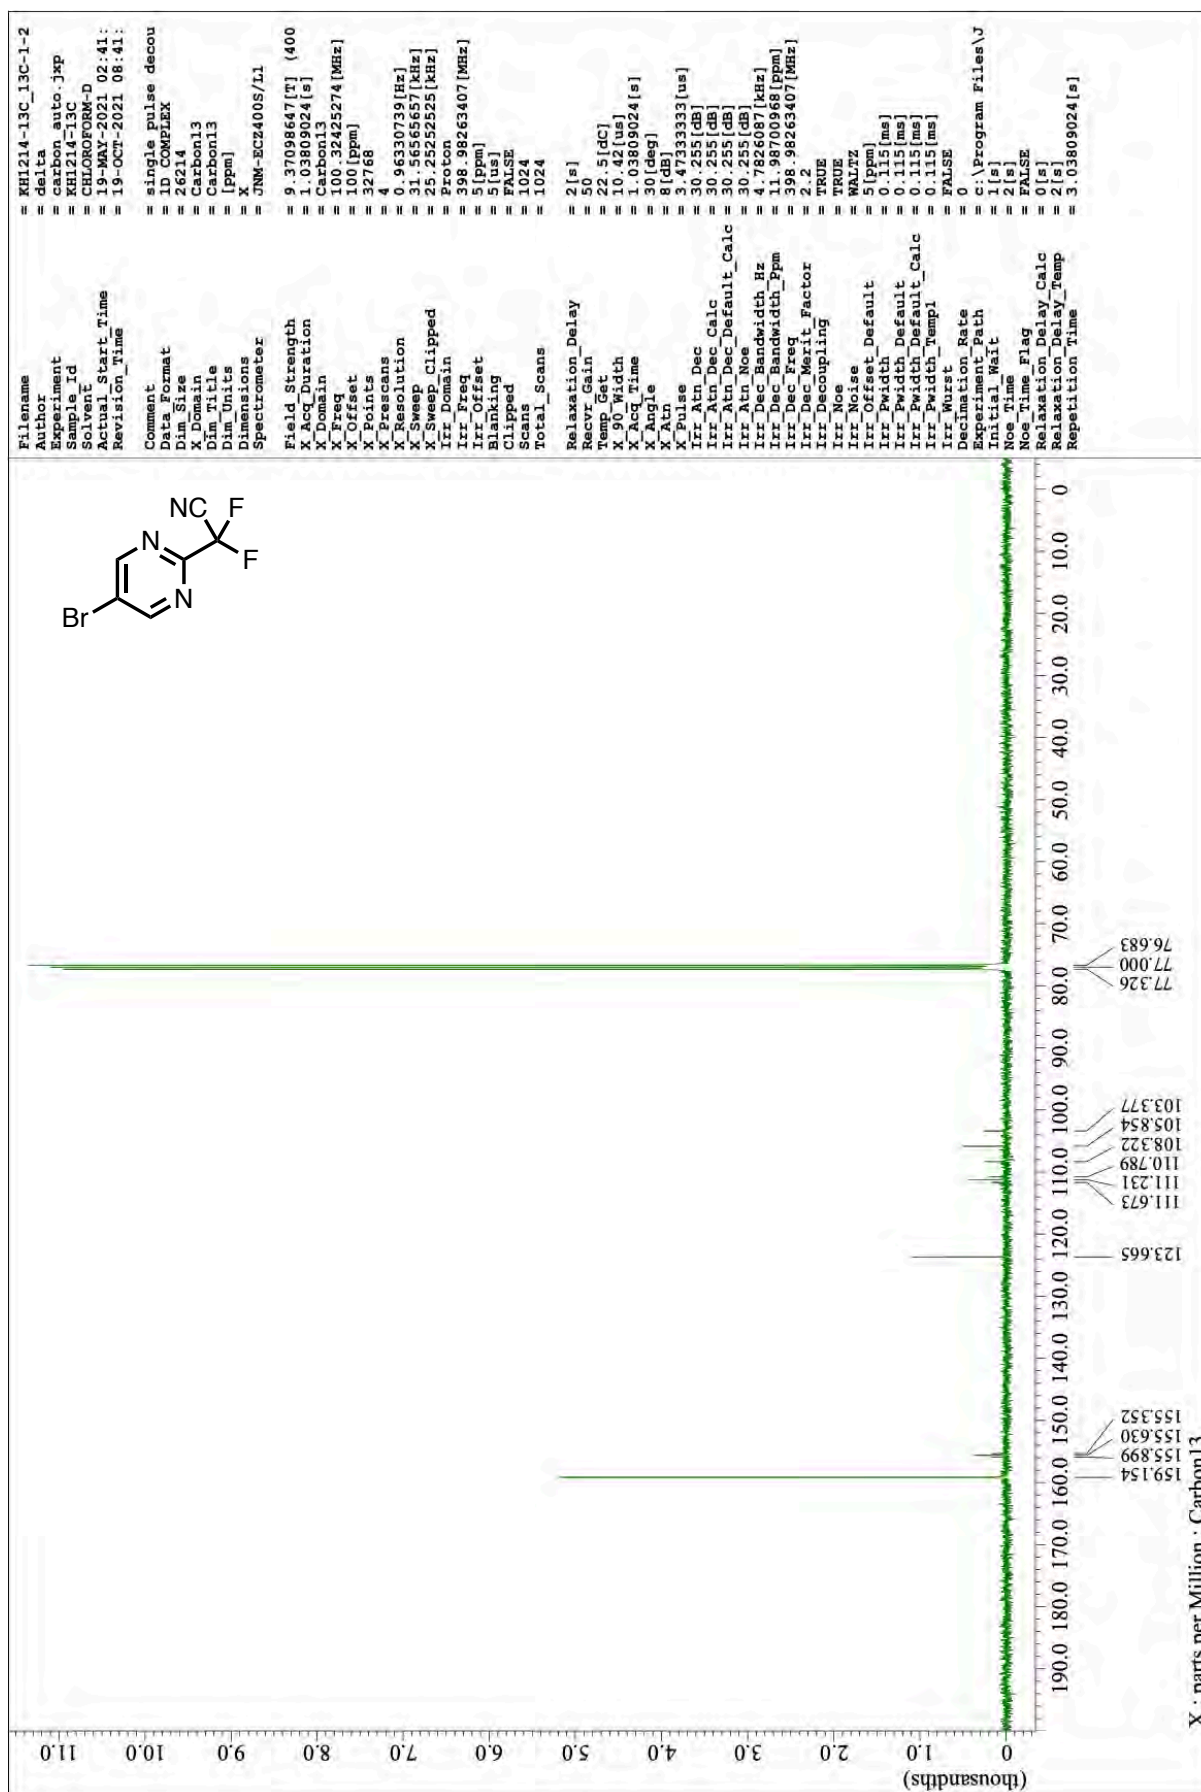

<sup>19</sup>F NMR of **9** (376 MHz, CDCl<sub>3</sub>)

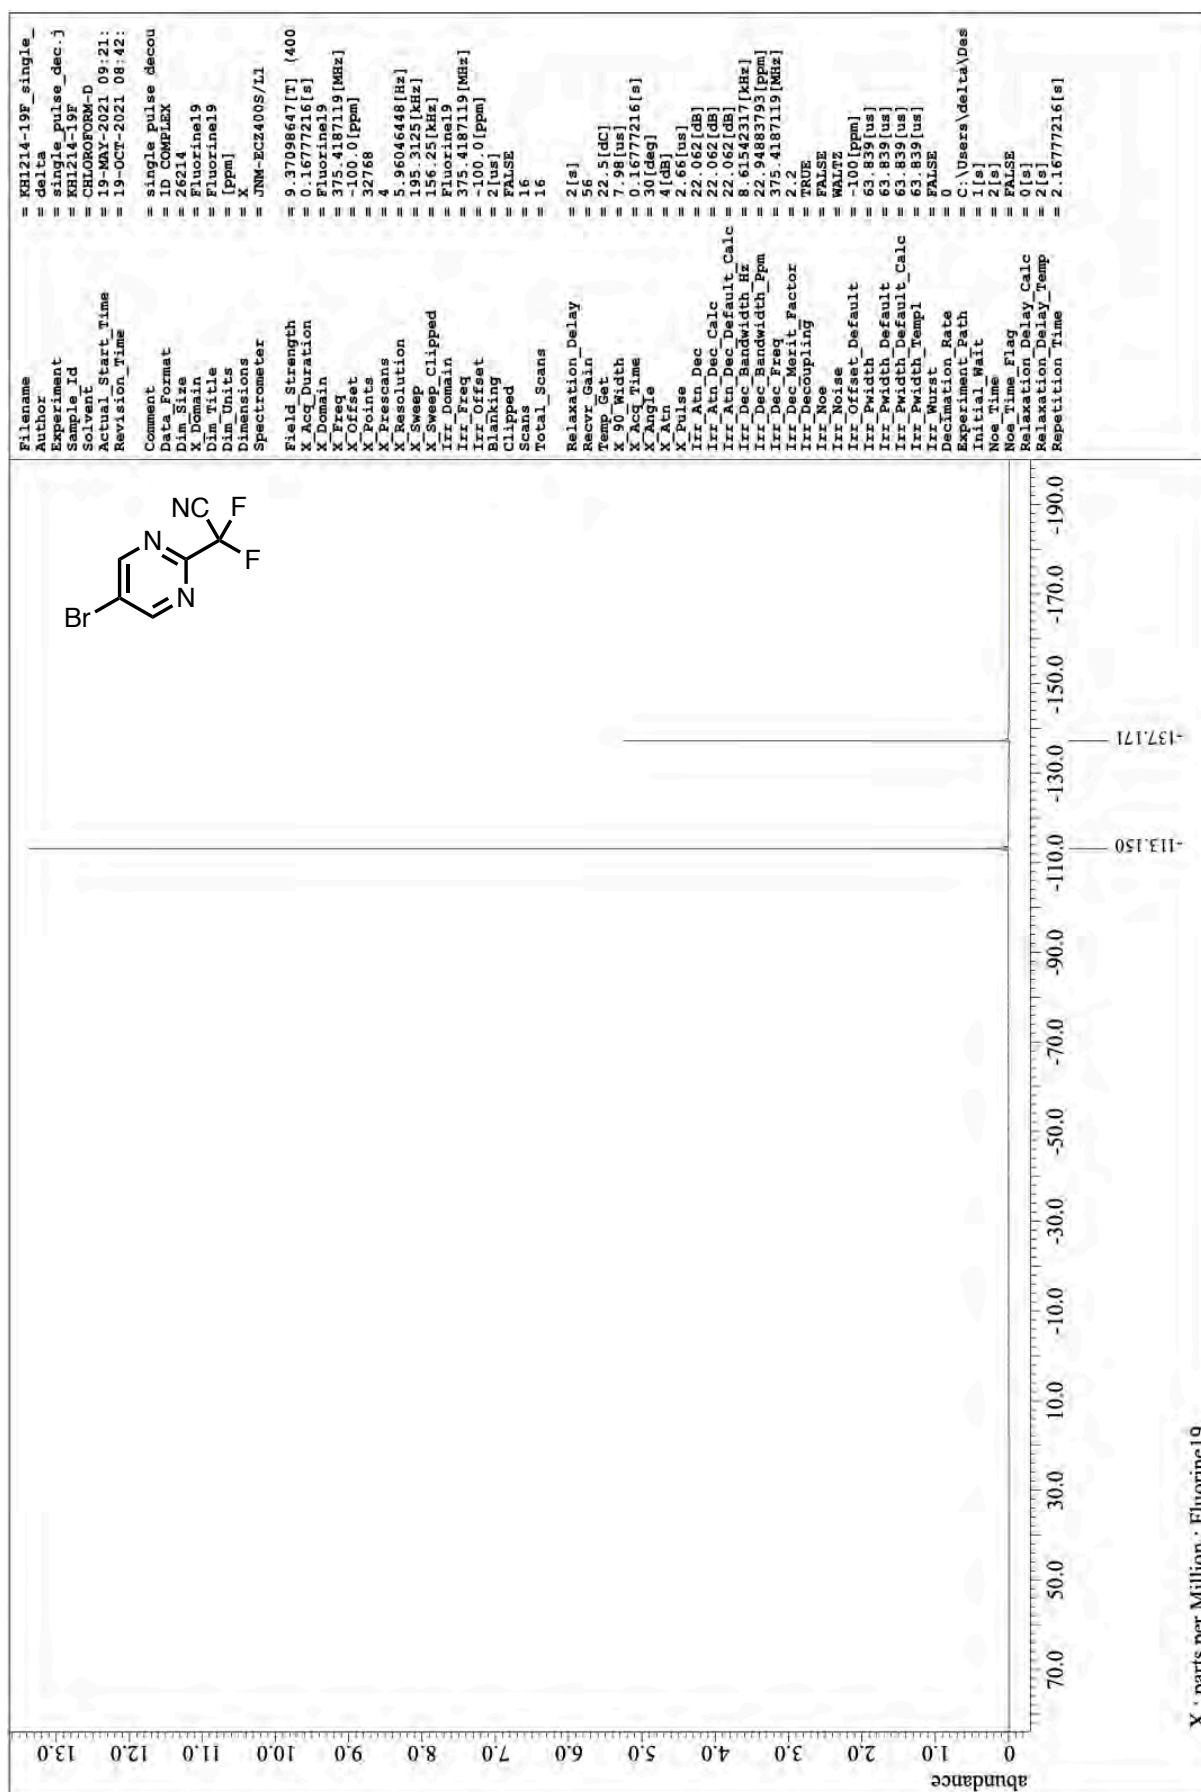

<sup>1</sup>H NMR of **10** (400 MHz, CDCl<sub>3</sub>)

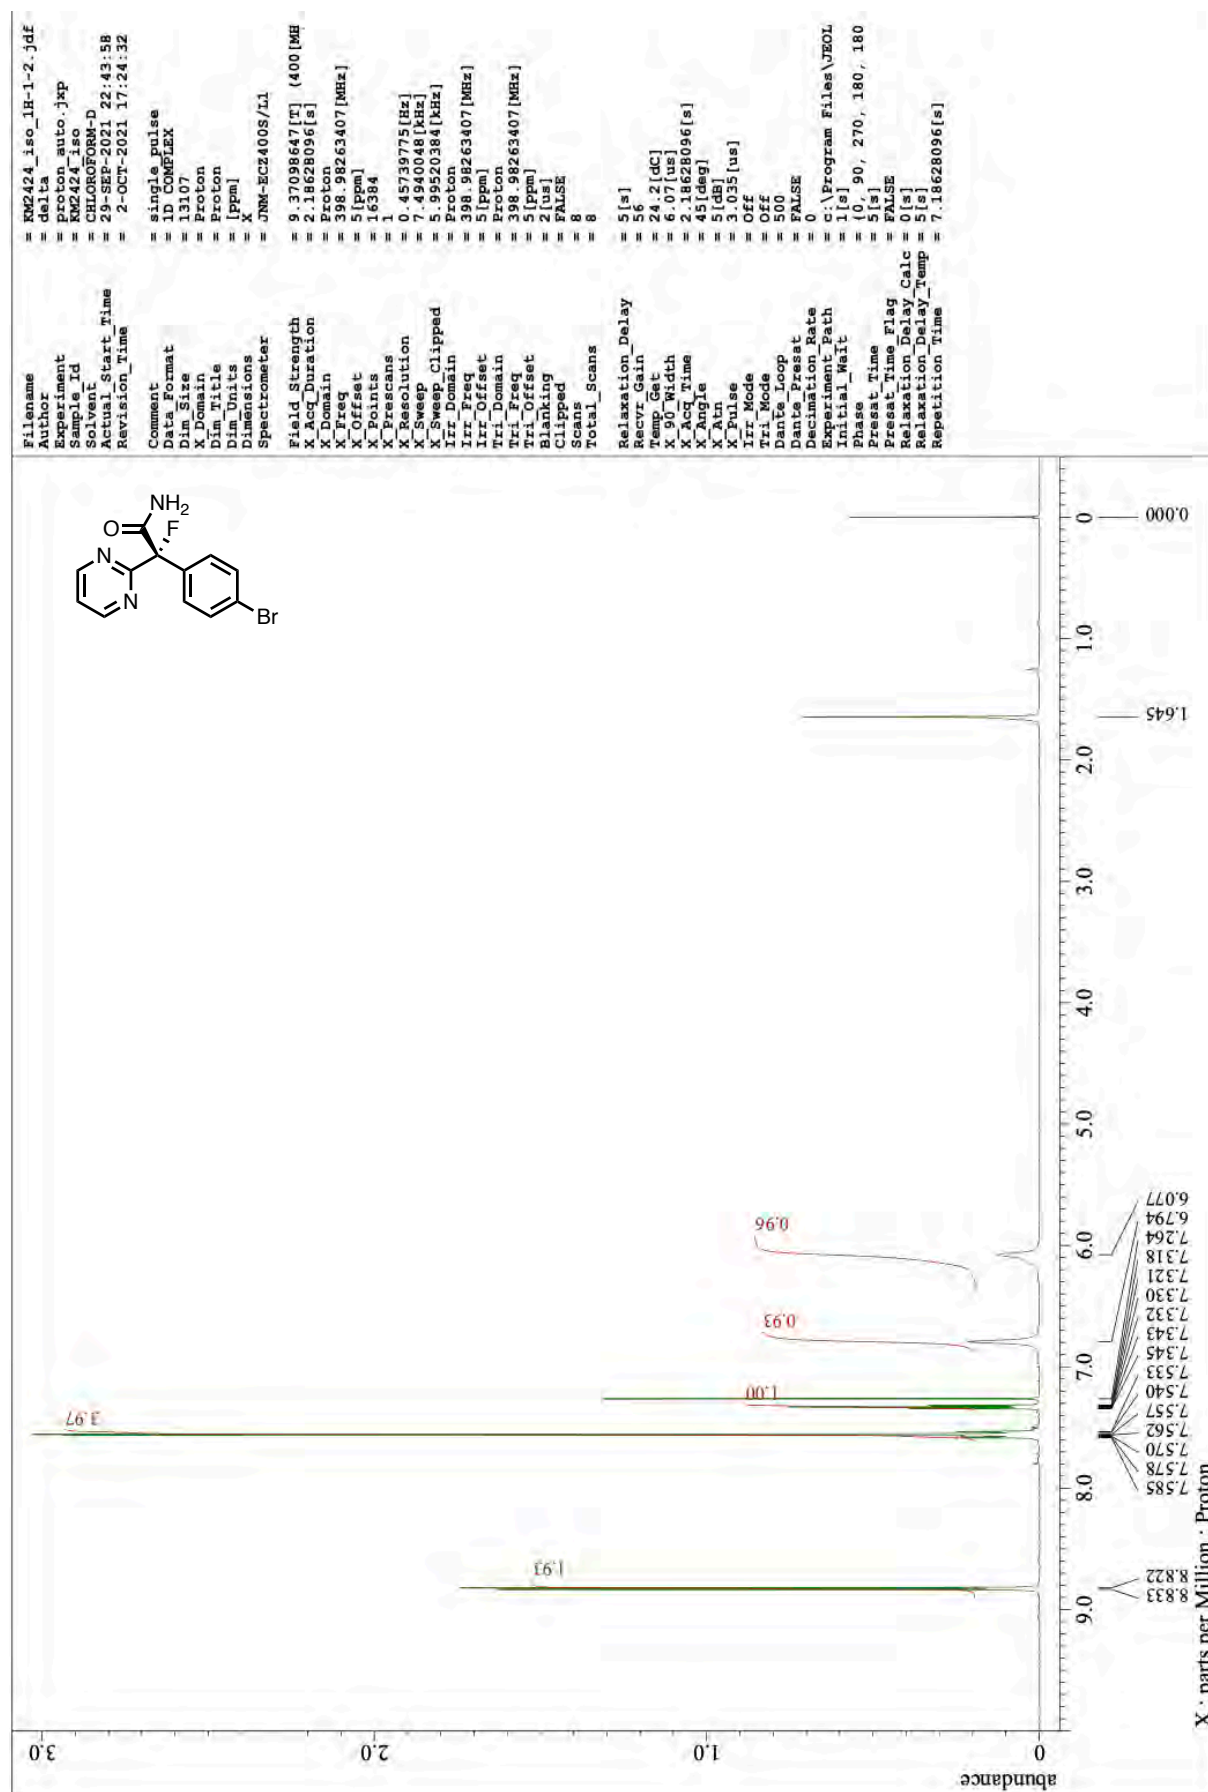

<sup>13</sup>C NMR of **10** (101 MHz, CDCl<sub>3</sub>)

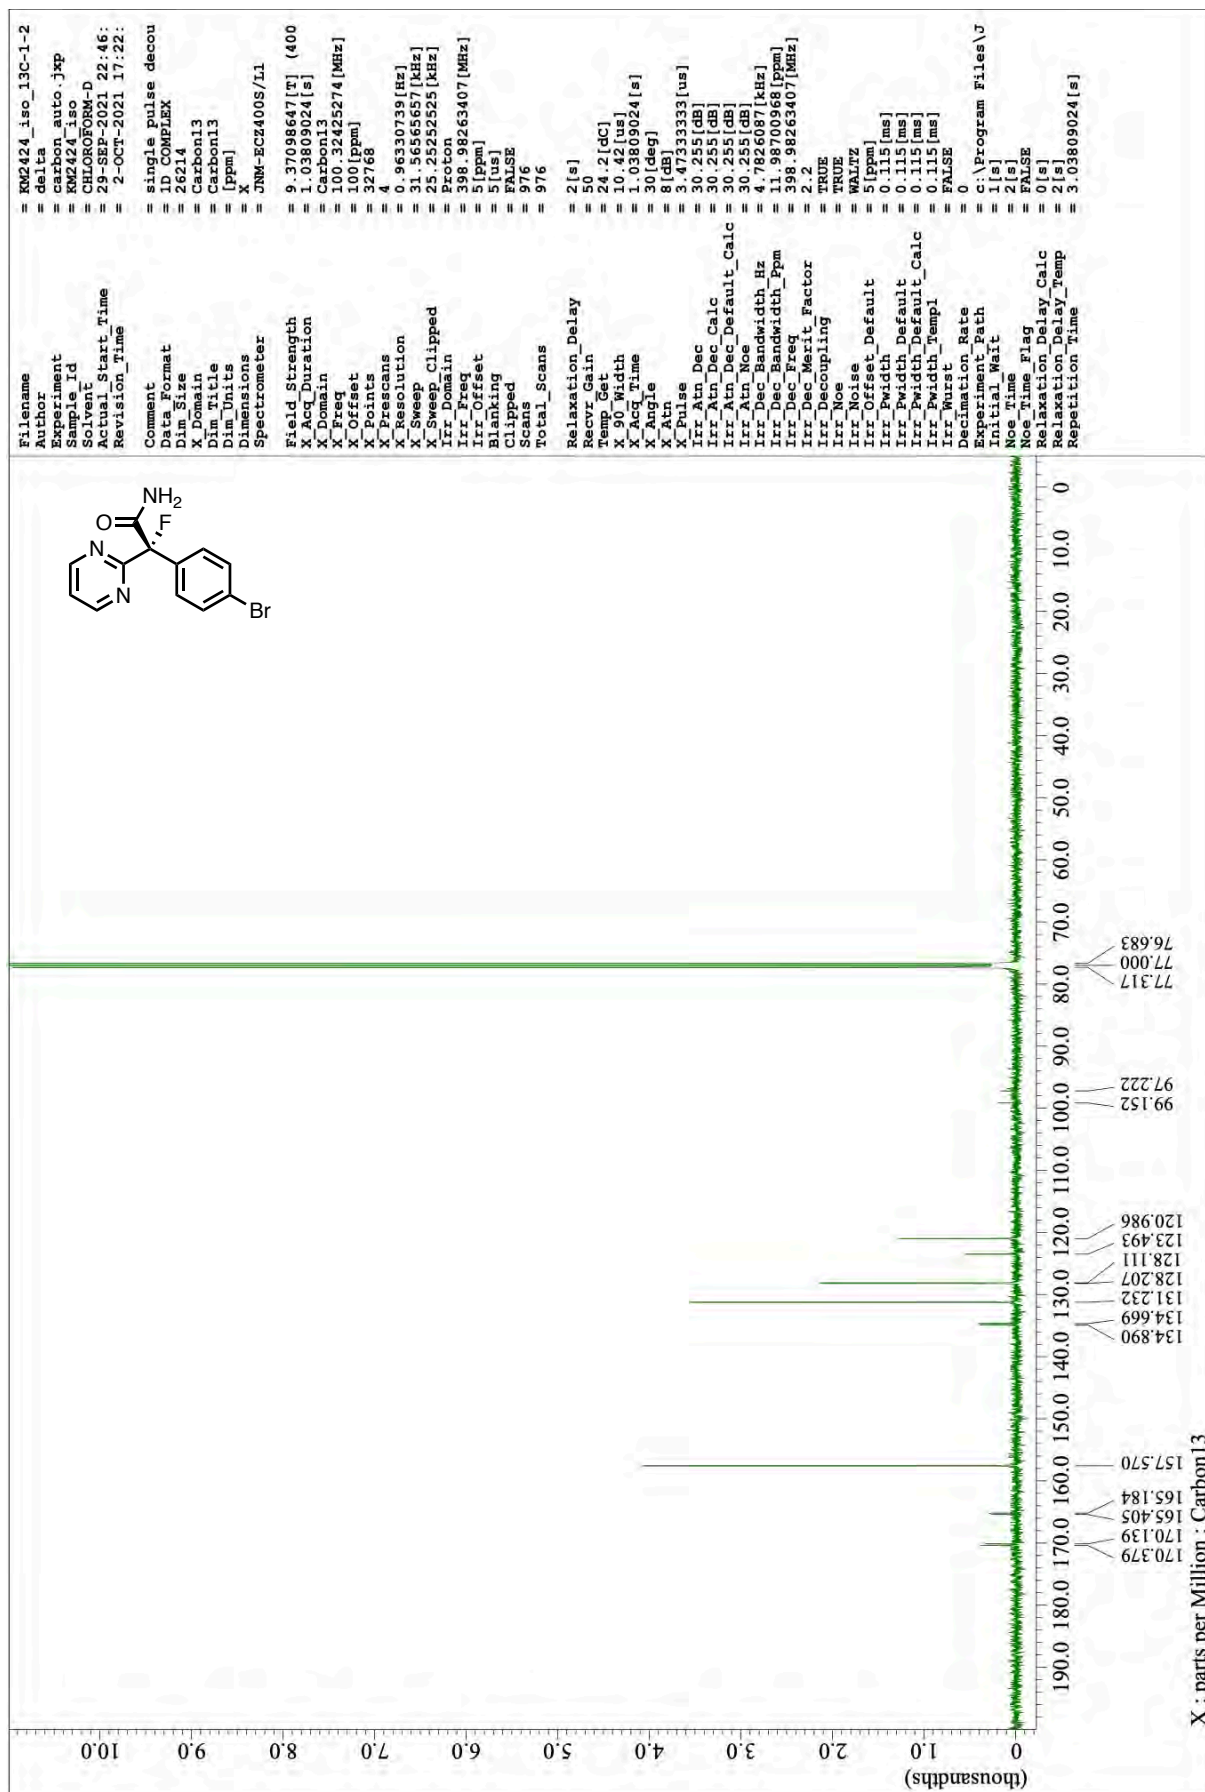

<sup>19</sup>F NMR of **10** (376 MHz, CDCl<sub>3</sub>)

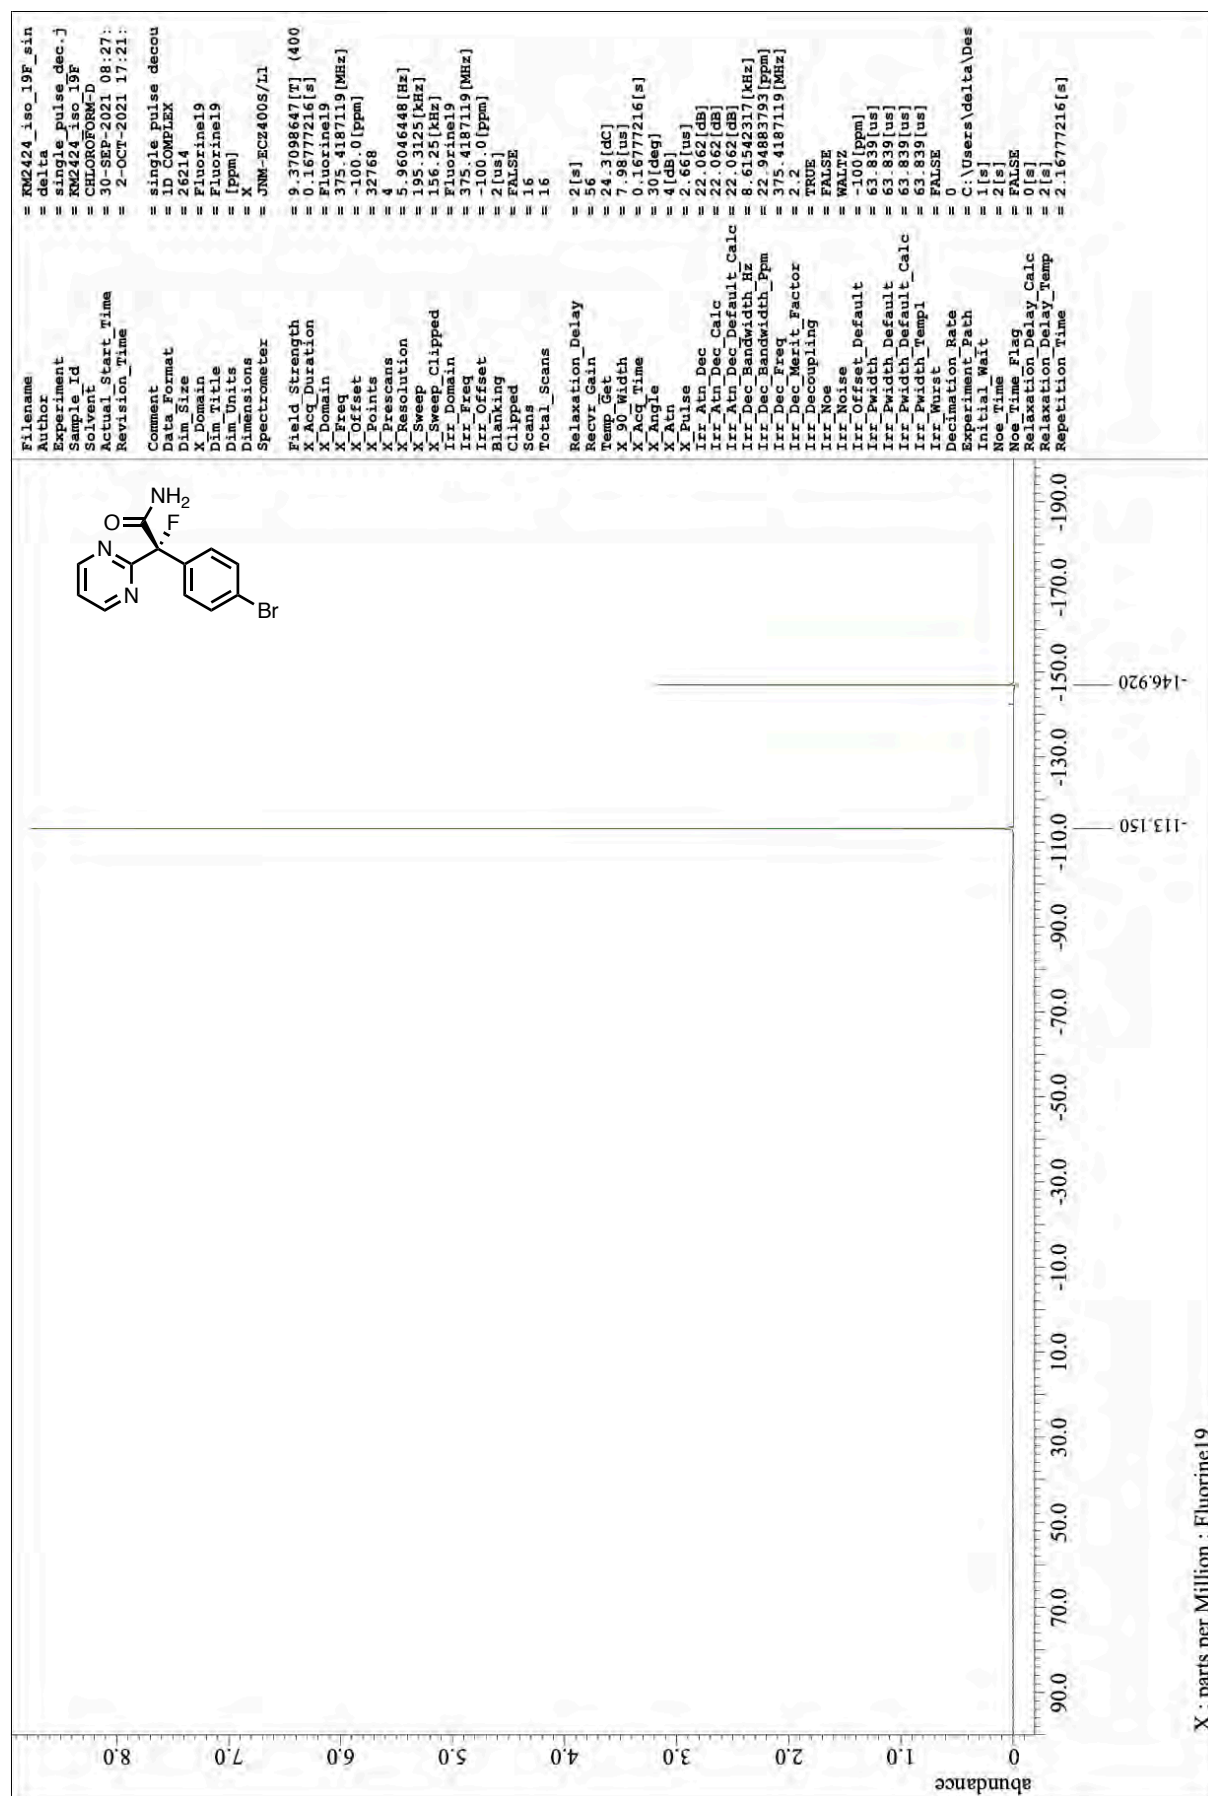

<sup>1</sup>H NMR of **11** (400 MHz, CDCl<sub>3</sub>)

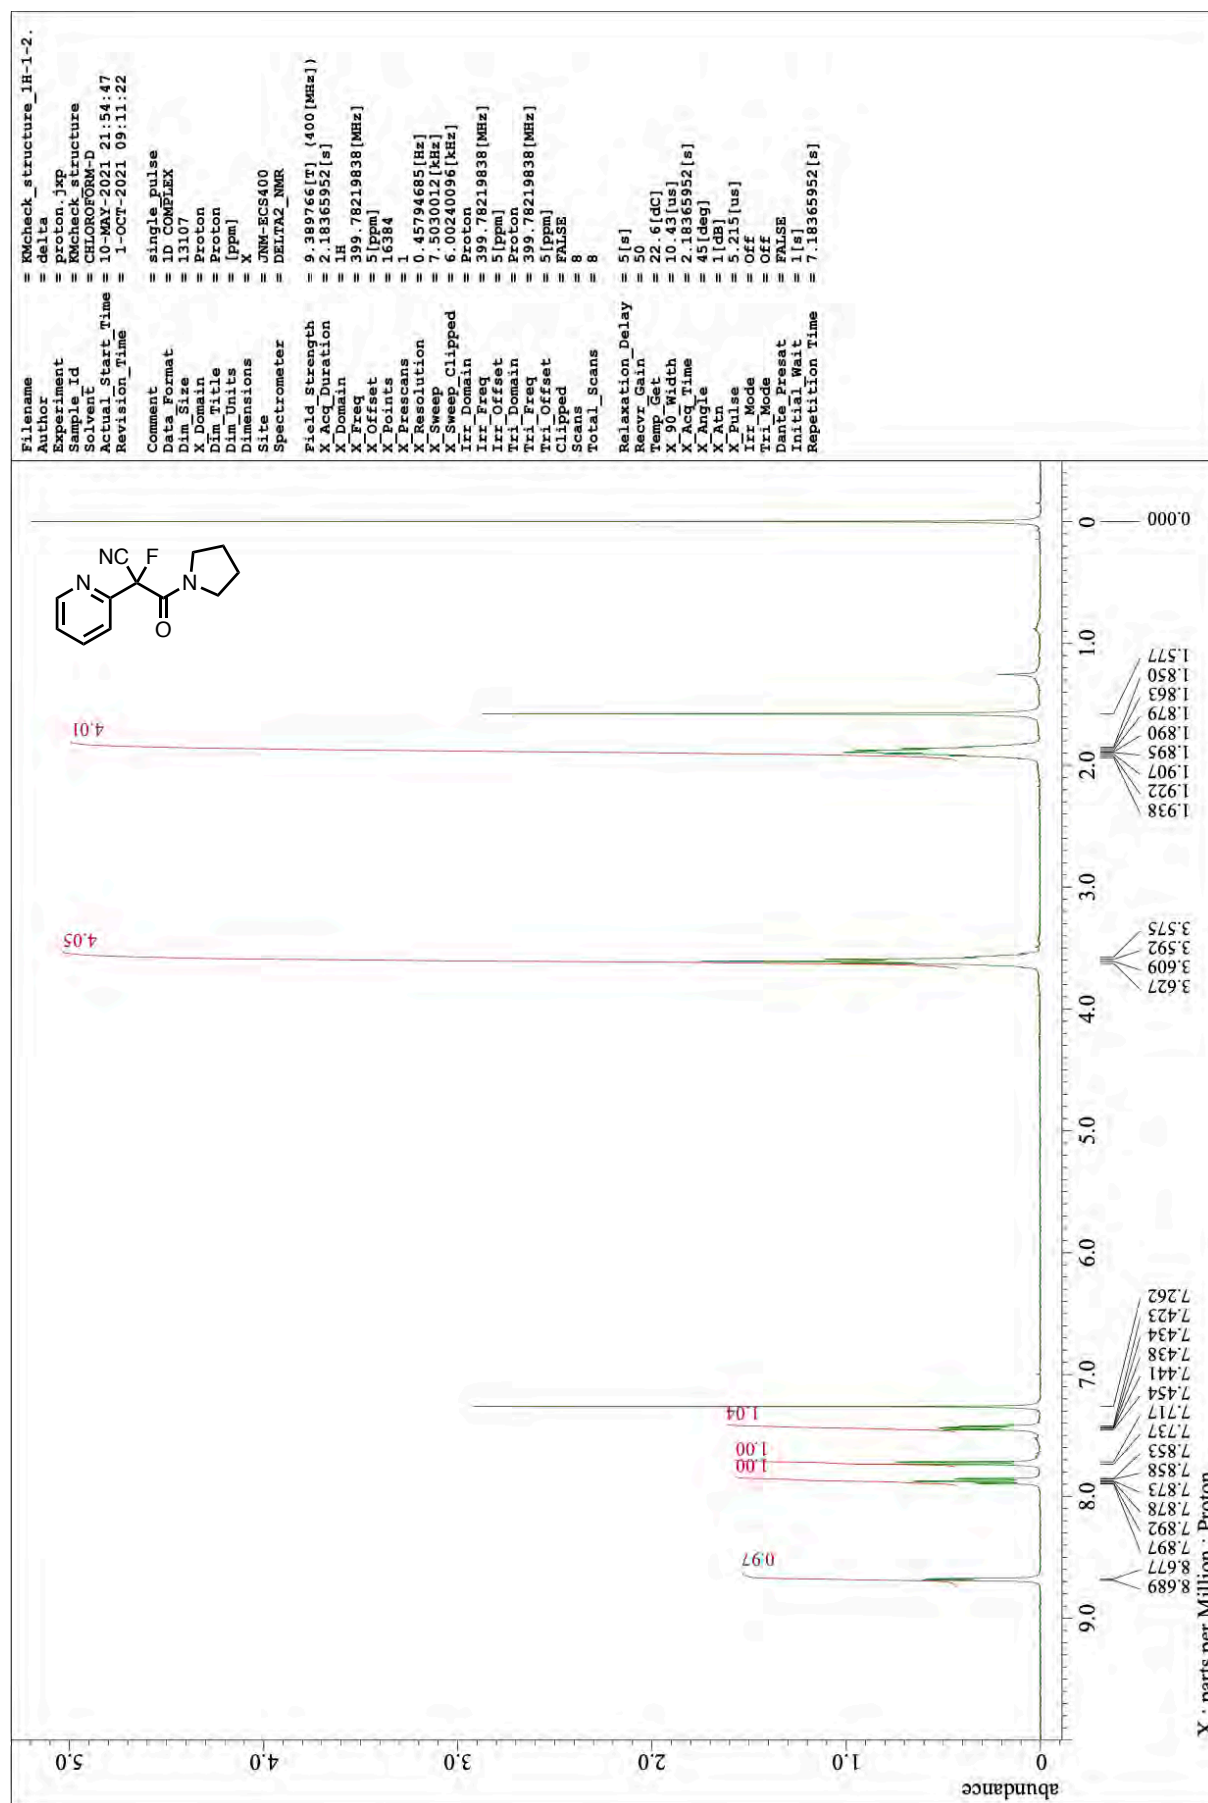

<sup>13</sup>C NMR of **11** (101 MHz, CDCl<sub>3</sub>)

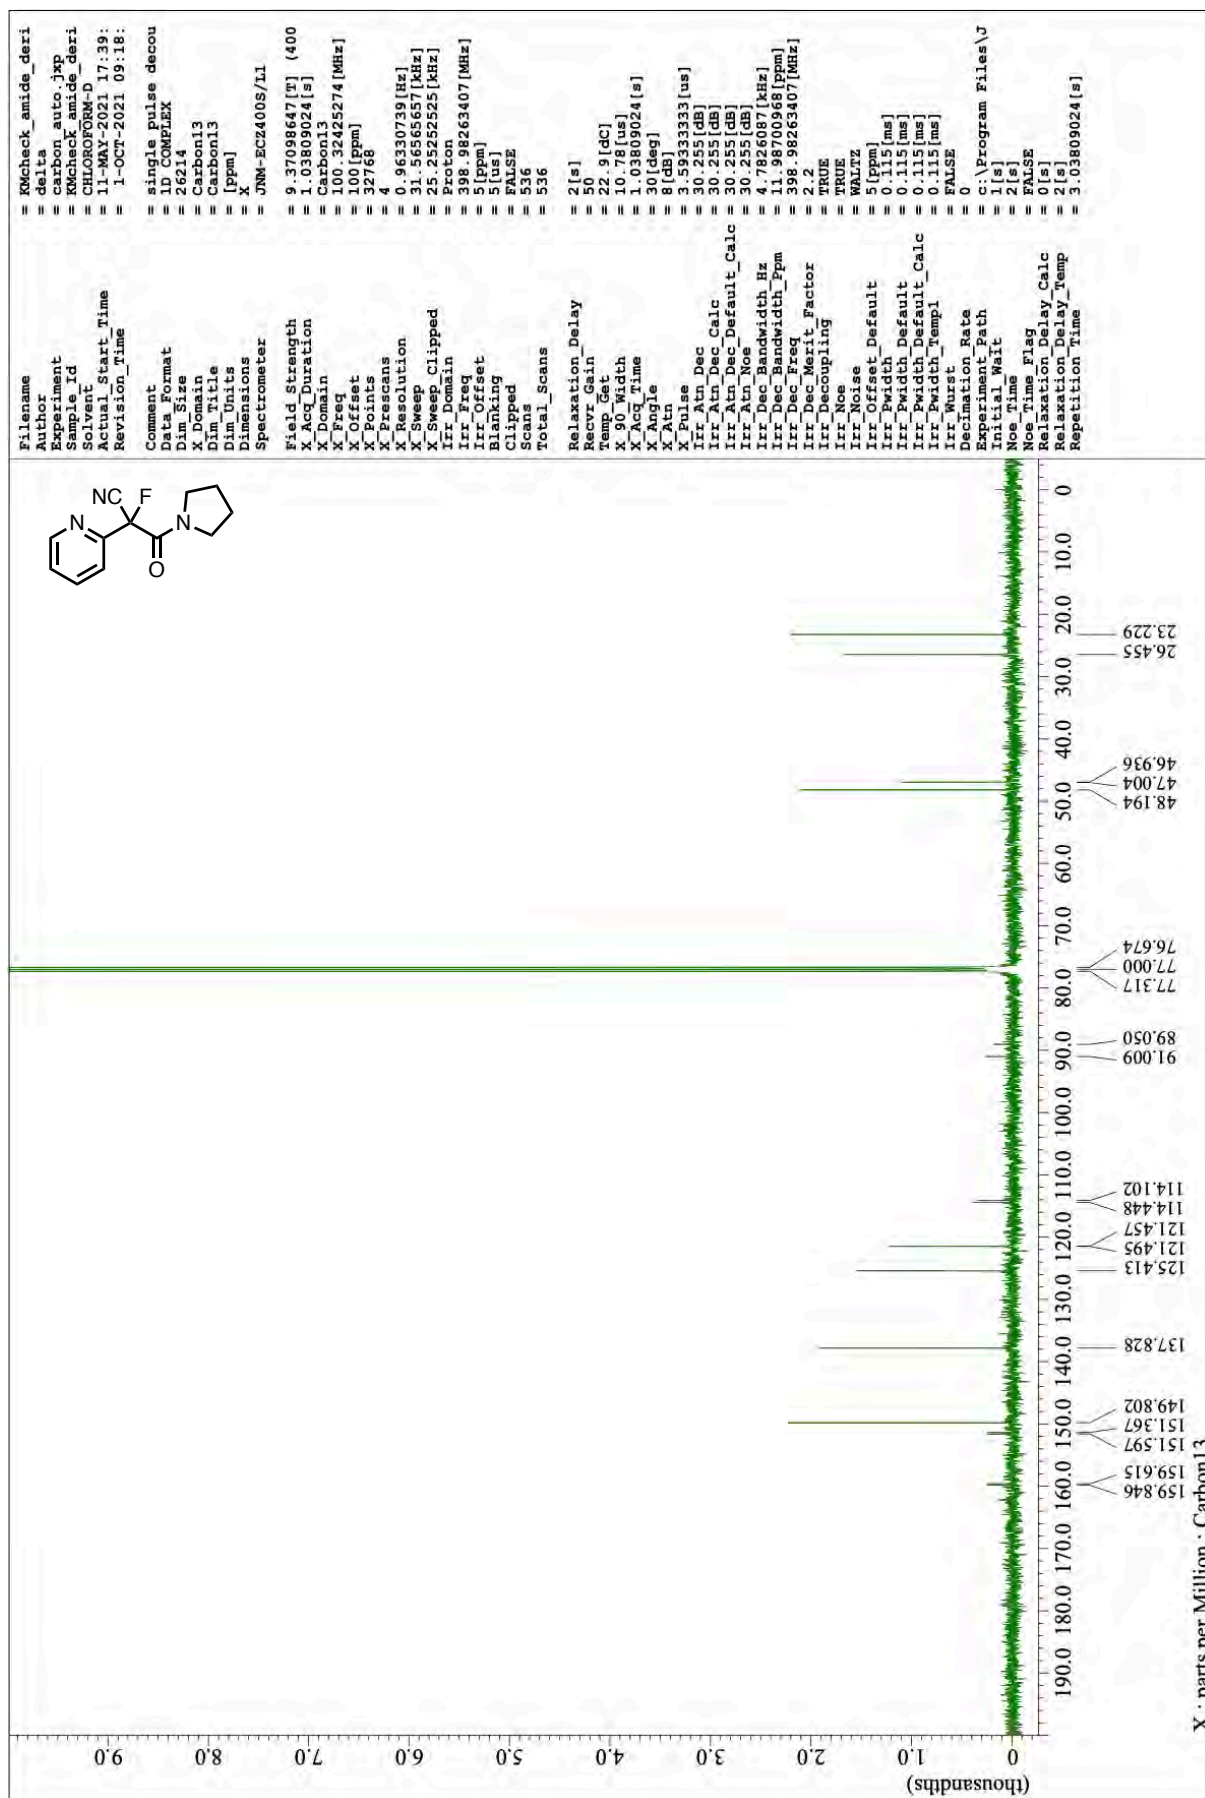



<sup>19</sup>F NMR of **11** (376 MHz, CDCl<sub>3</sub>)

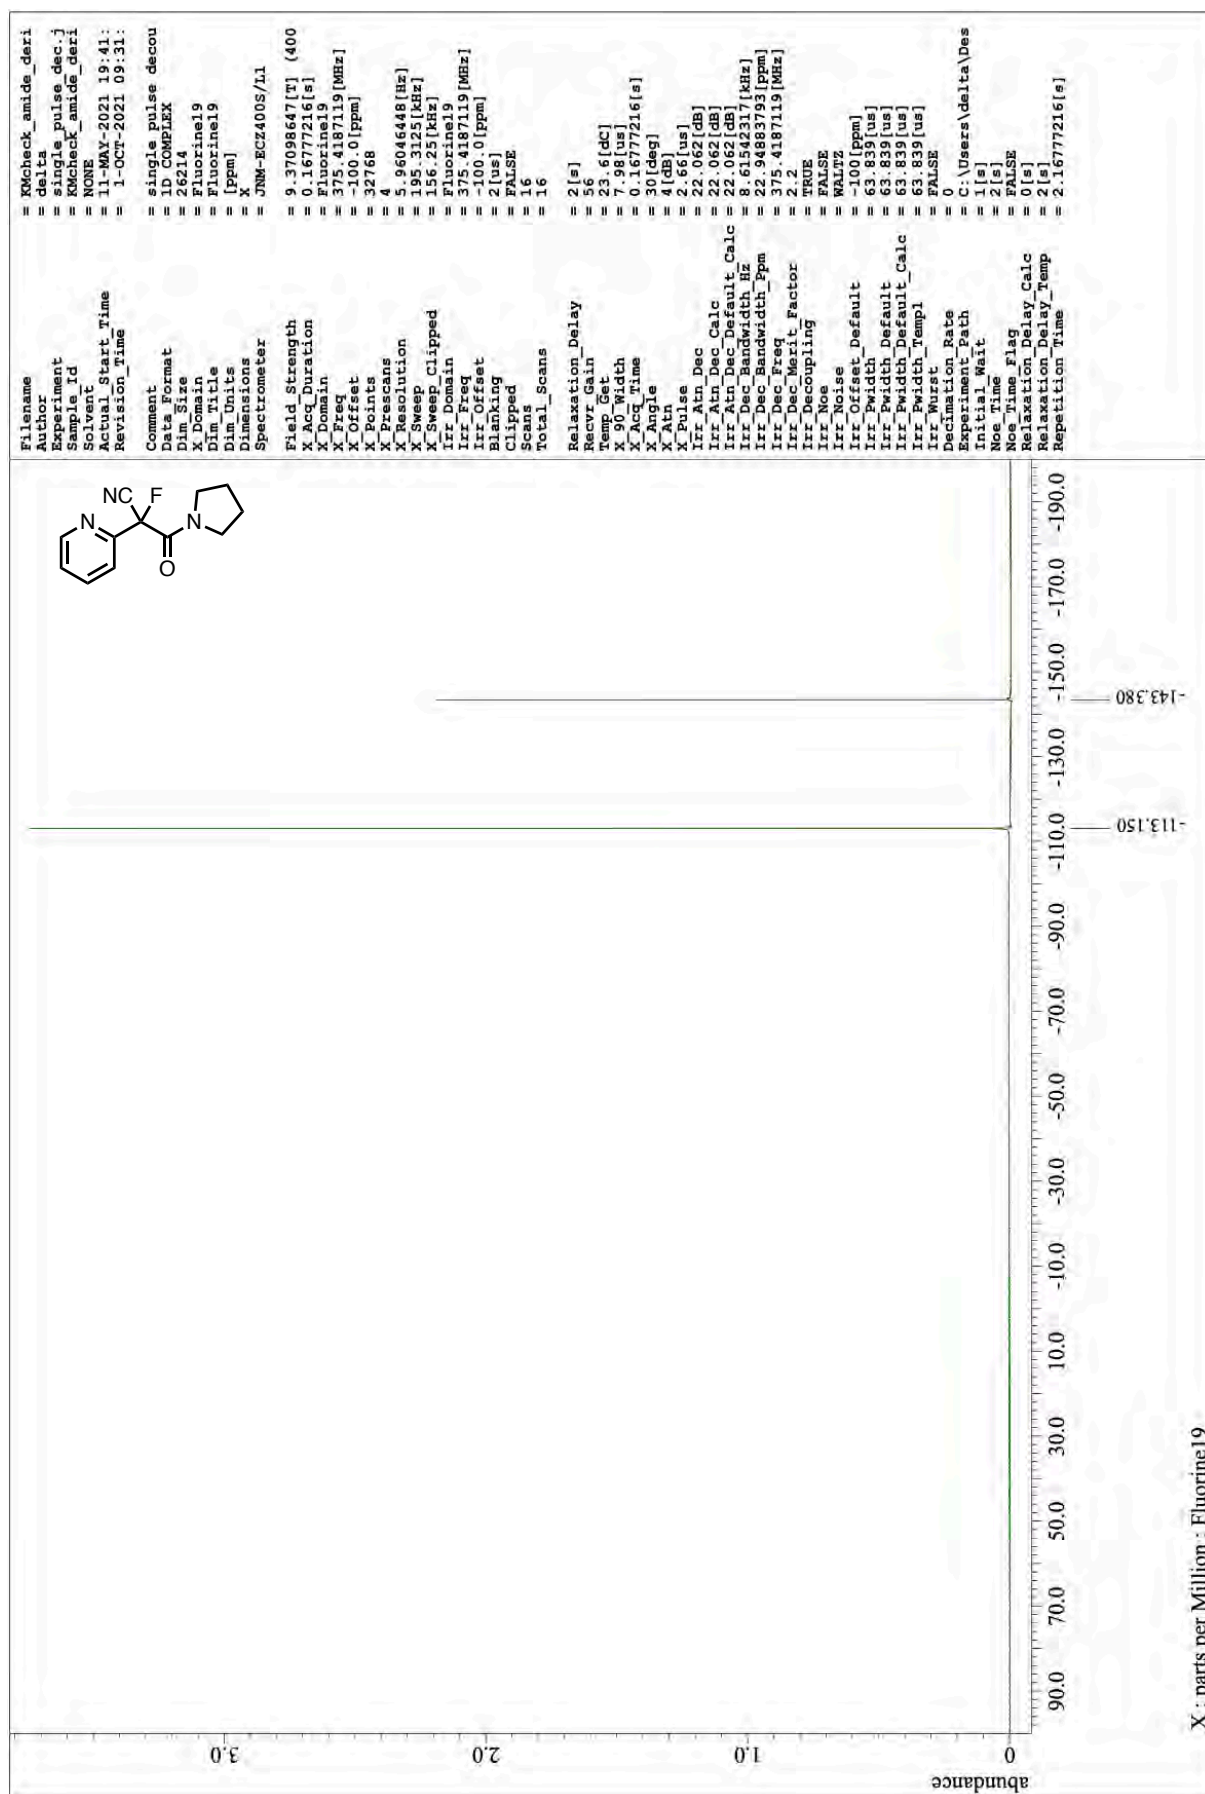

<sup>1</sup>H NMR of 12 (400 MHz, CDCl<sub>3</sub>)

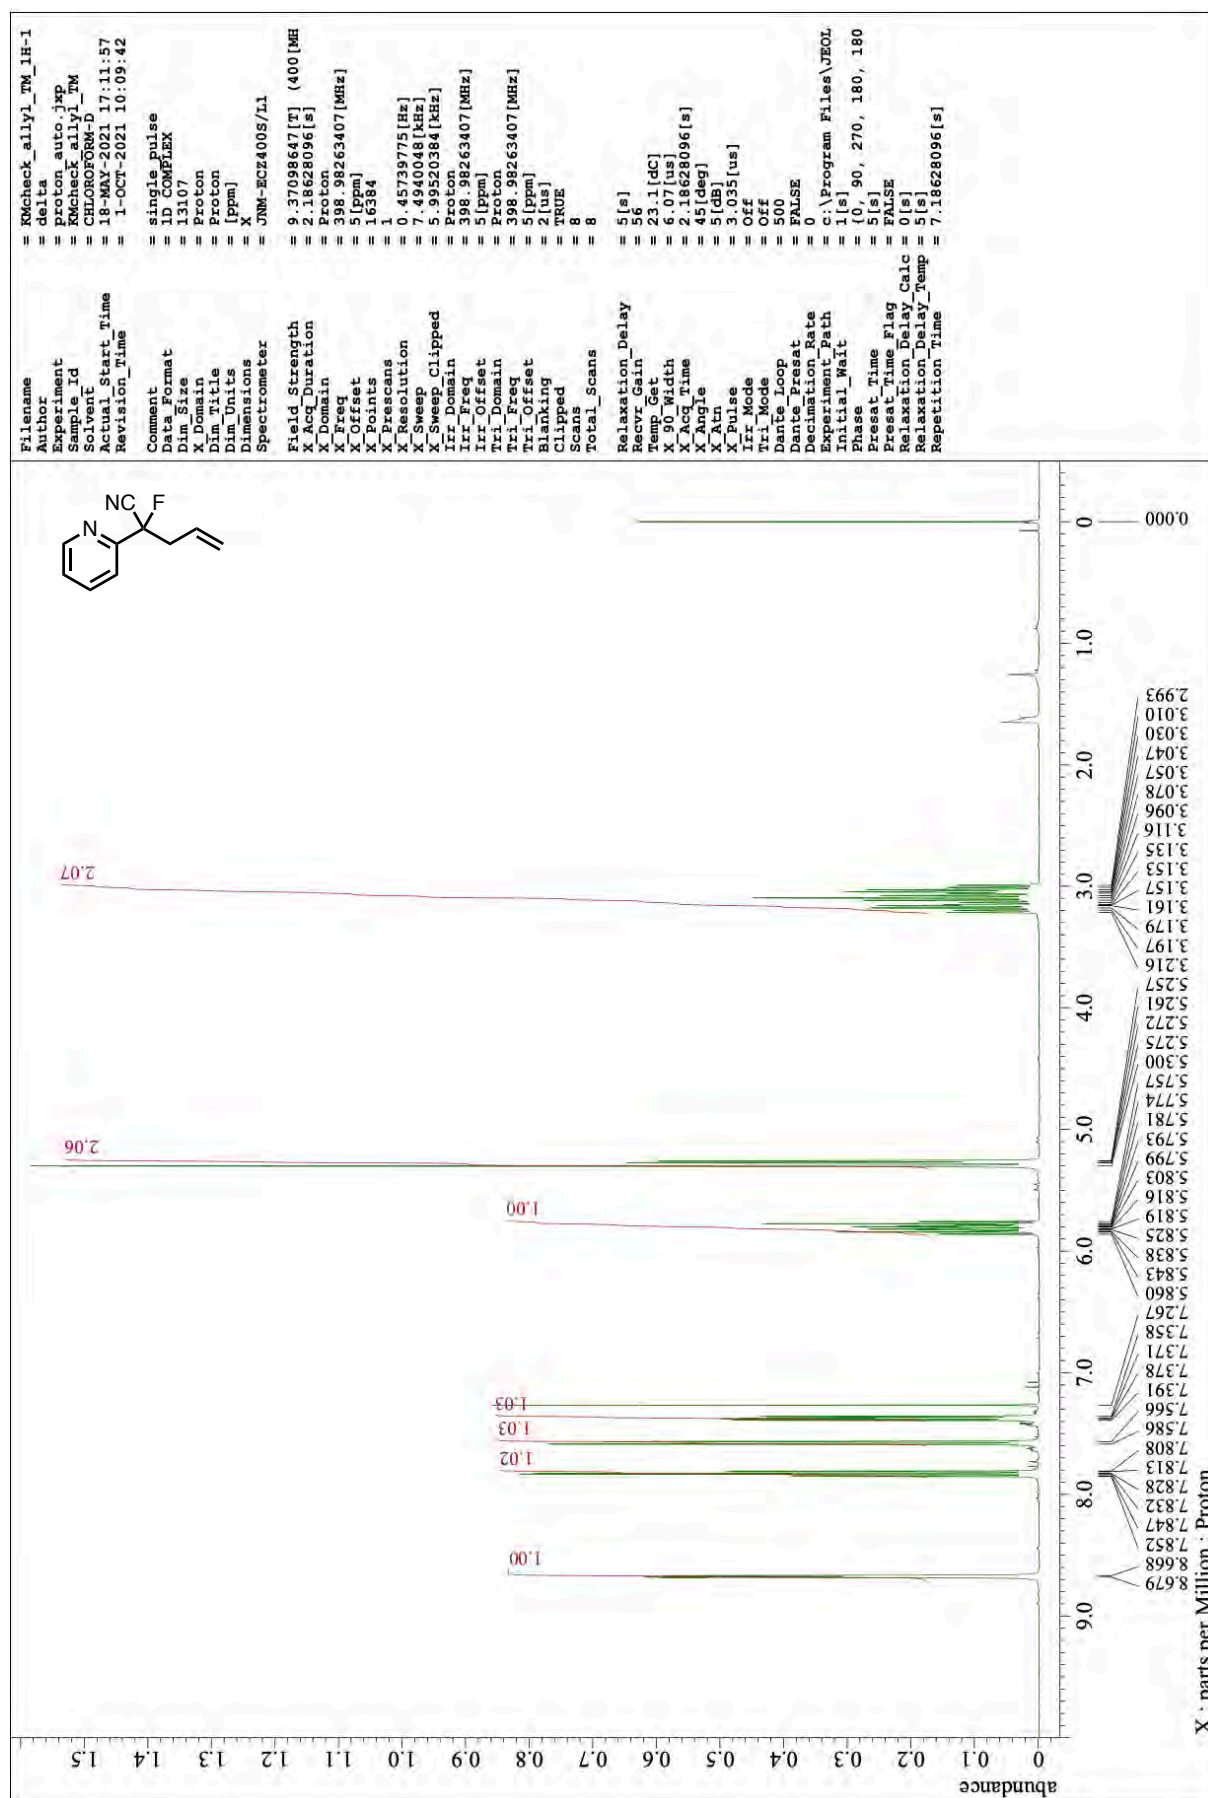

<sup>13</sup>C NMR of **12** (101 MHz, CDCl<sub>3</sub>)

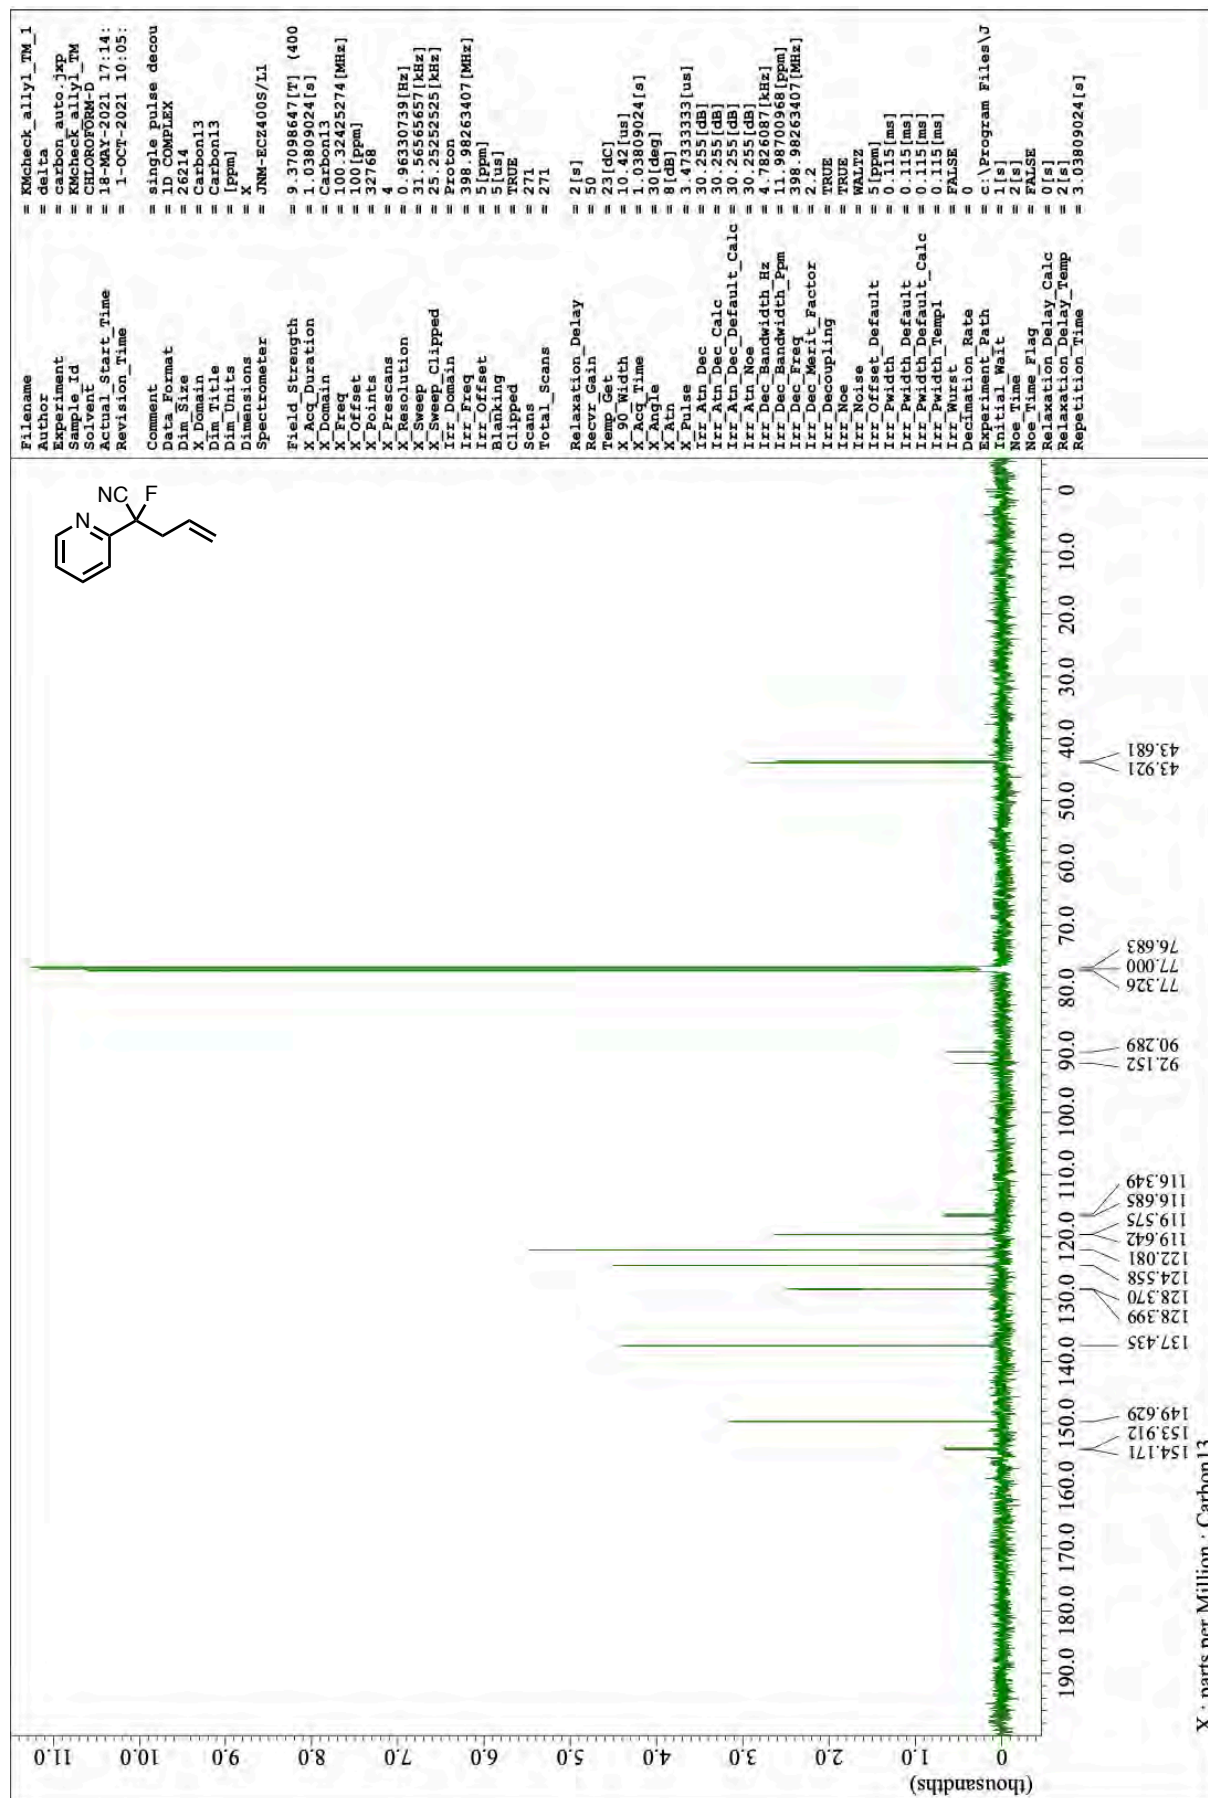

<sup>19</sup>F NMR of **12** (376 MHz, CDCl<sub>3</sub>)

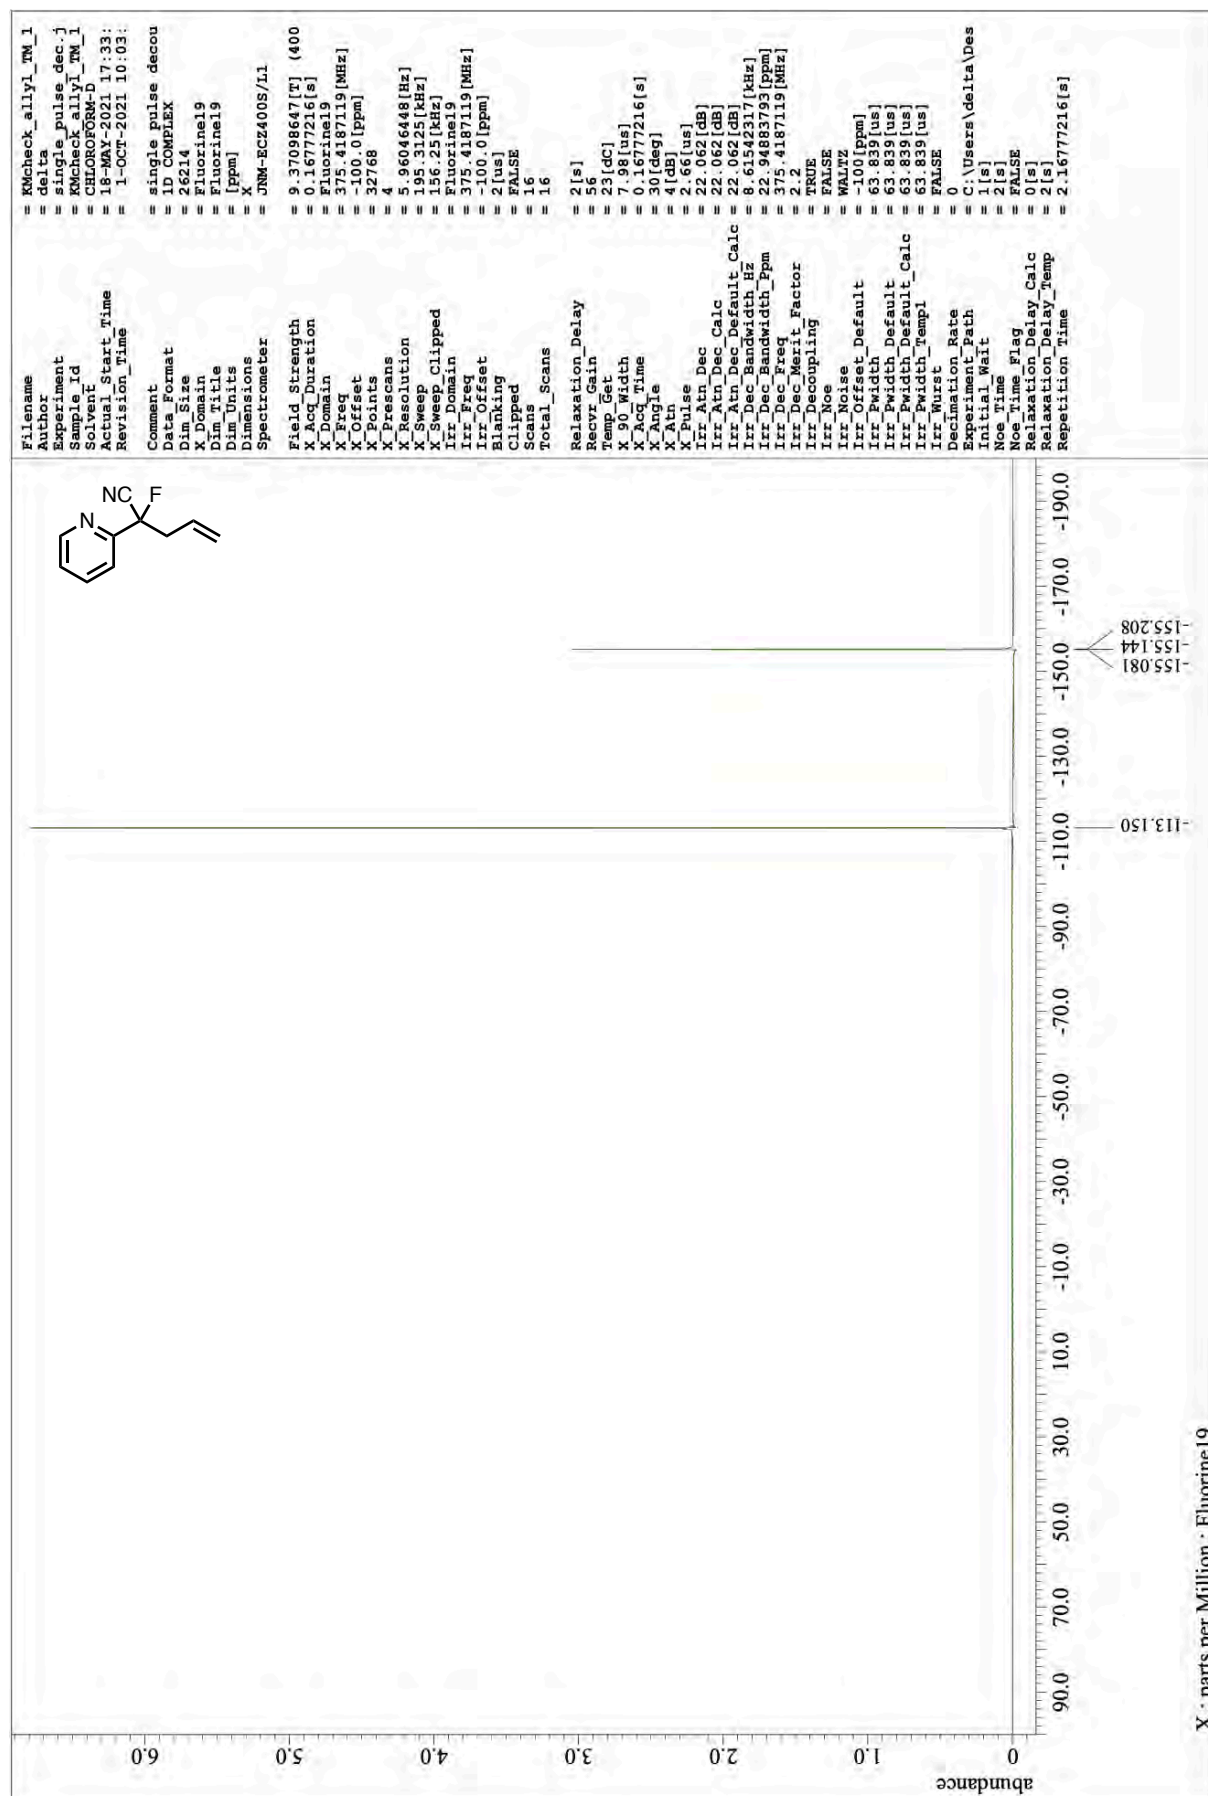

<sup>1</sup>H NMR of **13** (400 MHz, CDCl<sub>3</sub>)

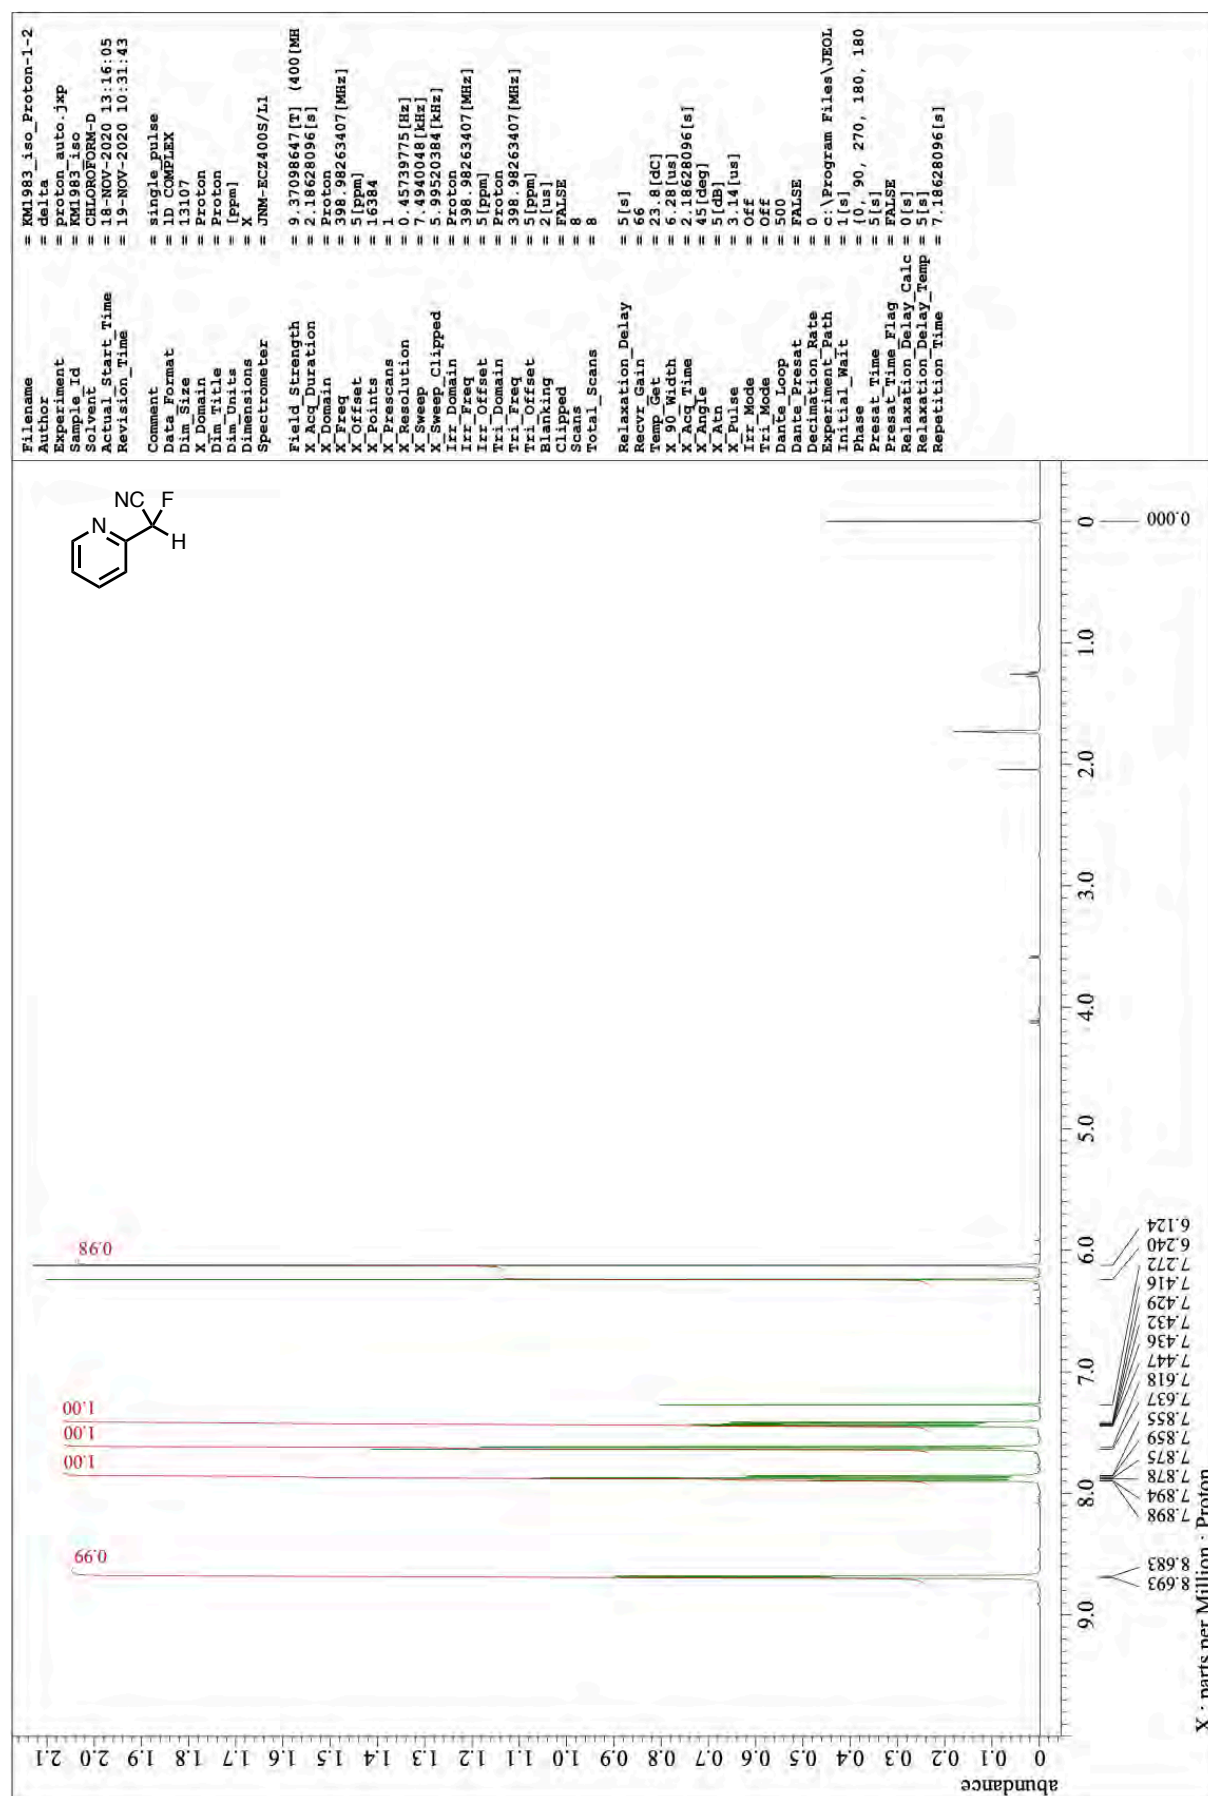

<sup>13</sup>C NMR of **13** (101 MHz, CDCl<sub>3</sub>)

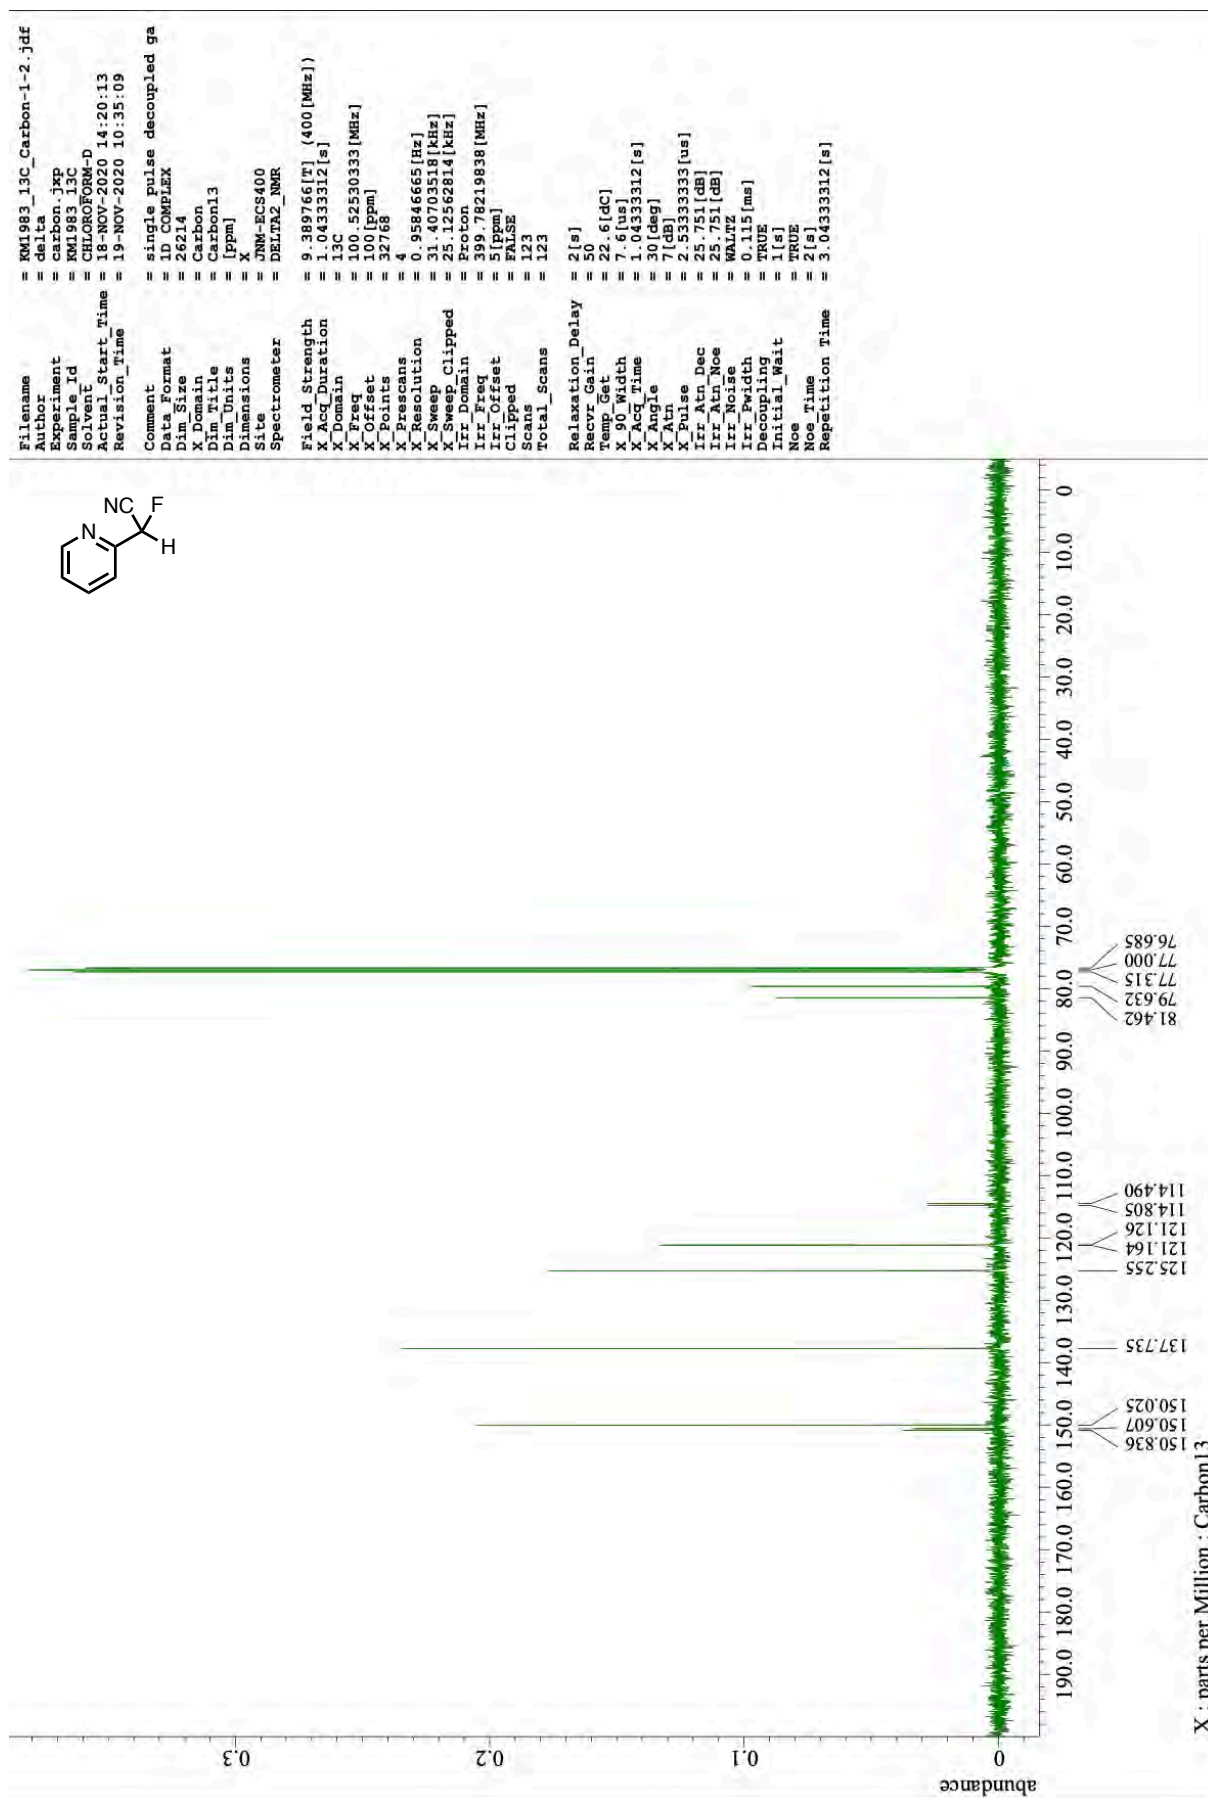

<sup>19</sup>F NMR of **13** (376 MHz, CDCl<sub>3</sub>)

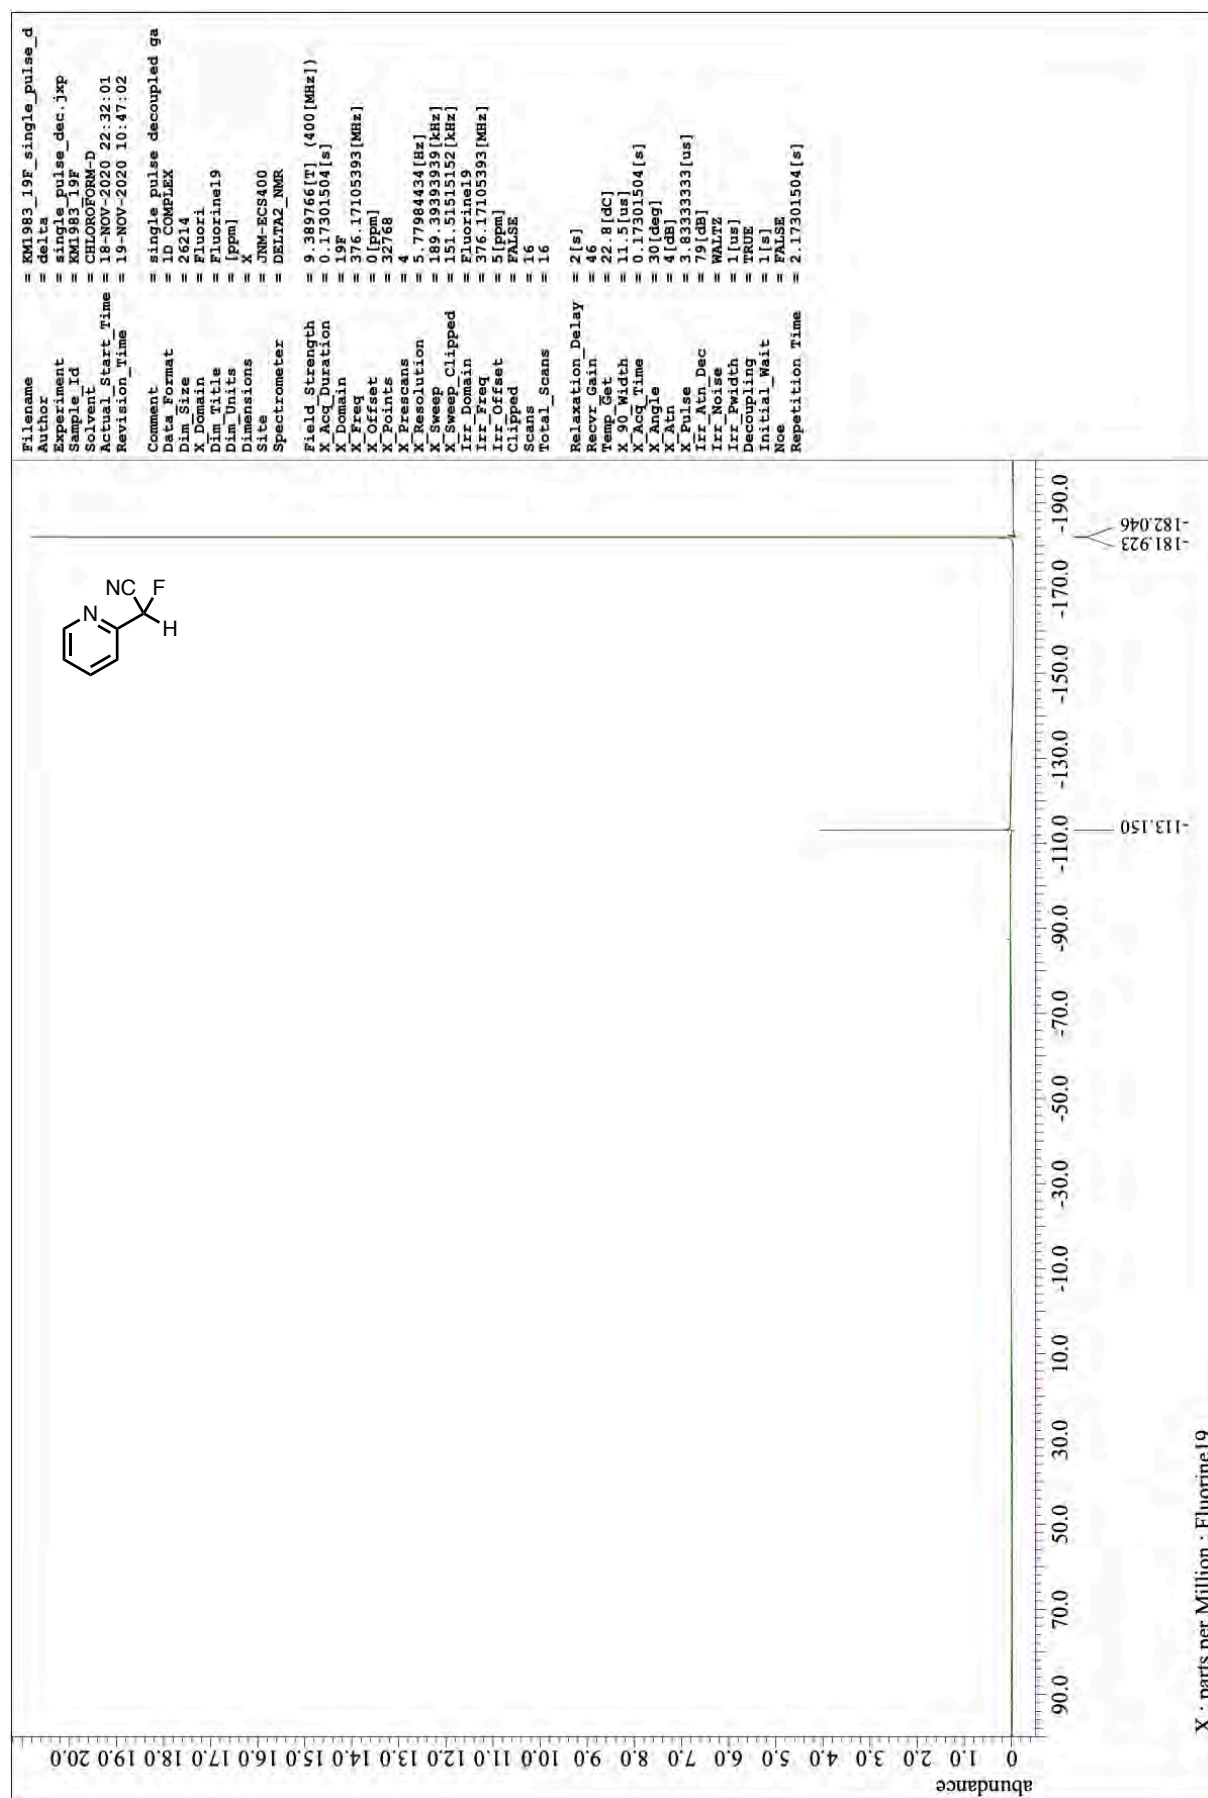

<sup>1</sup>H NMR of 14 (400 MHz, CDCl<sub>3</sub>)

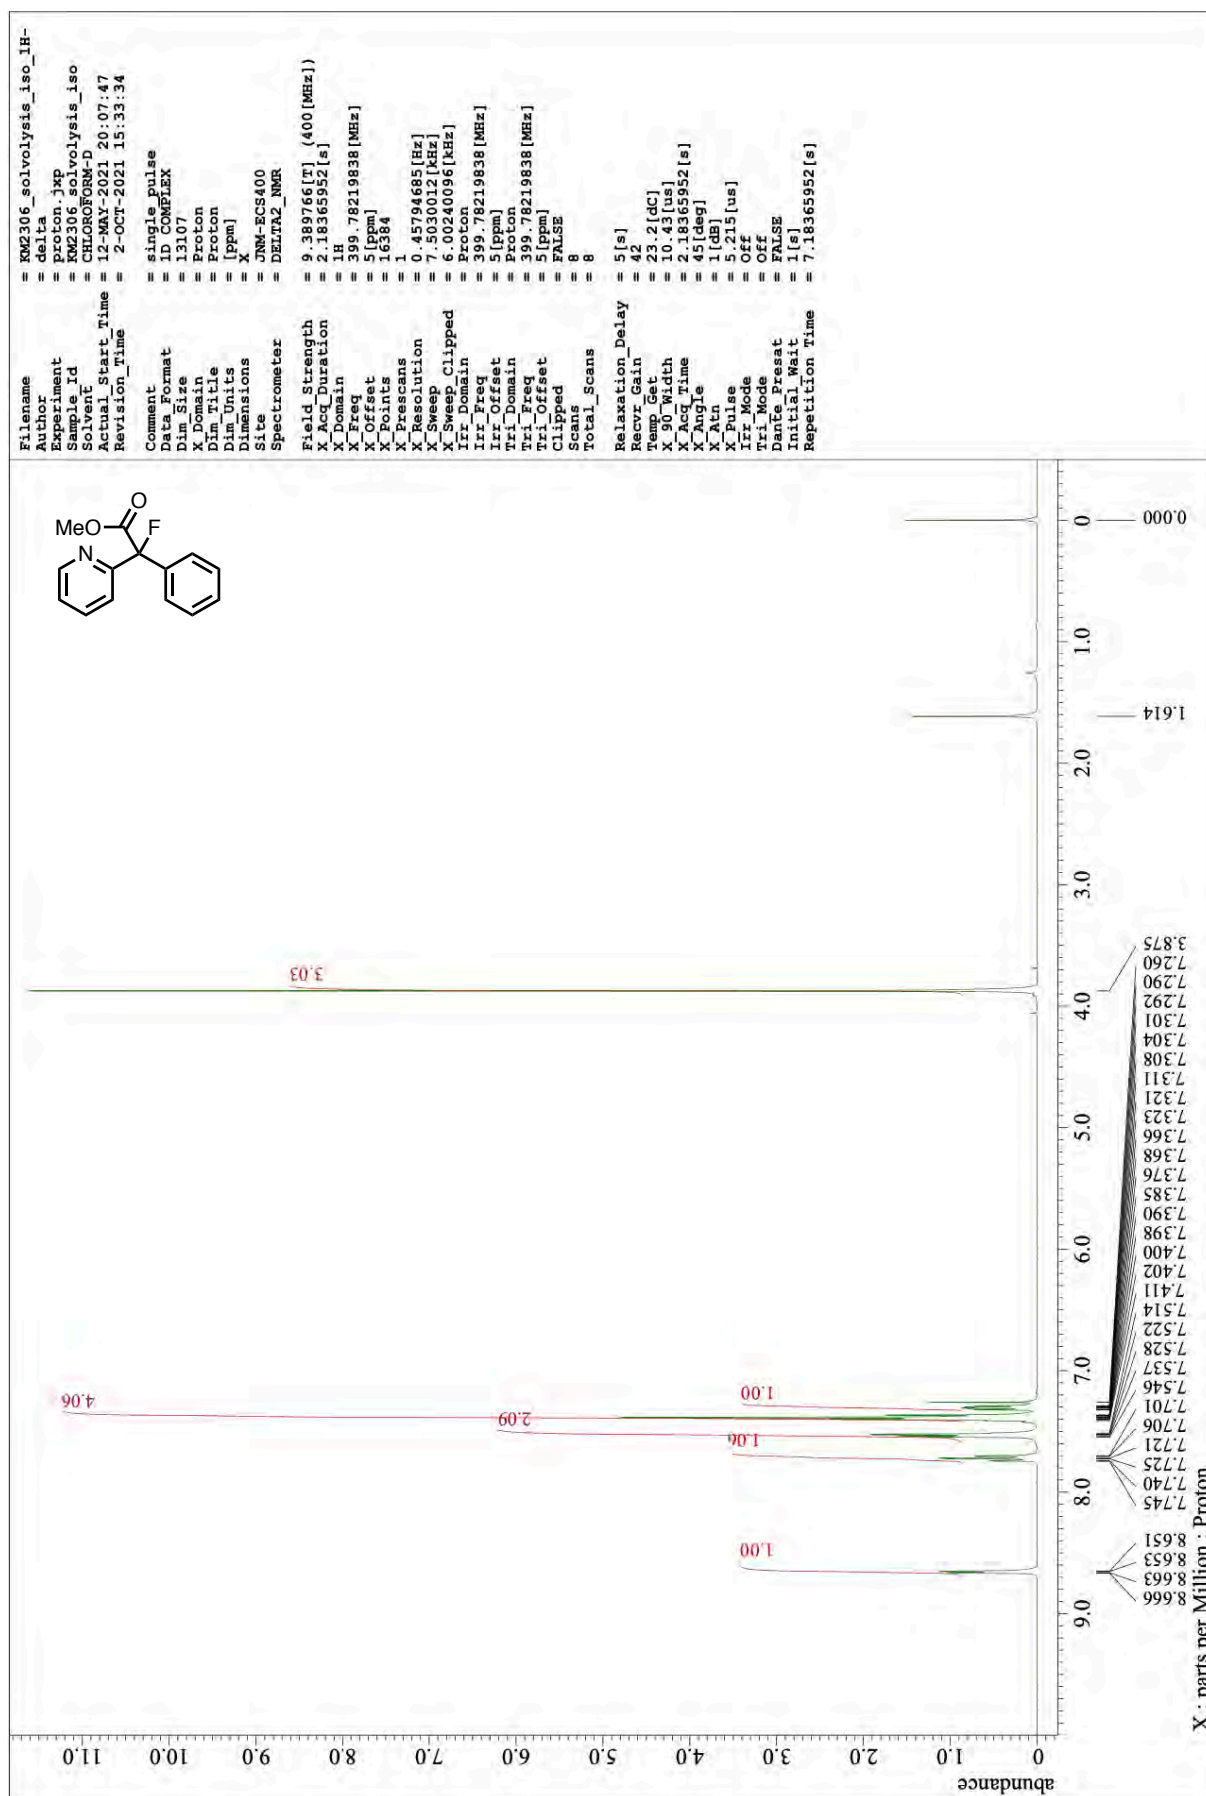



<sup>13</sup>C NMR of 14 (101 MHz, CDCl<sub>3</sub>)

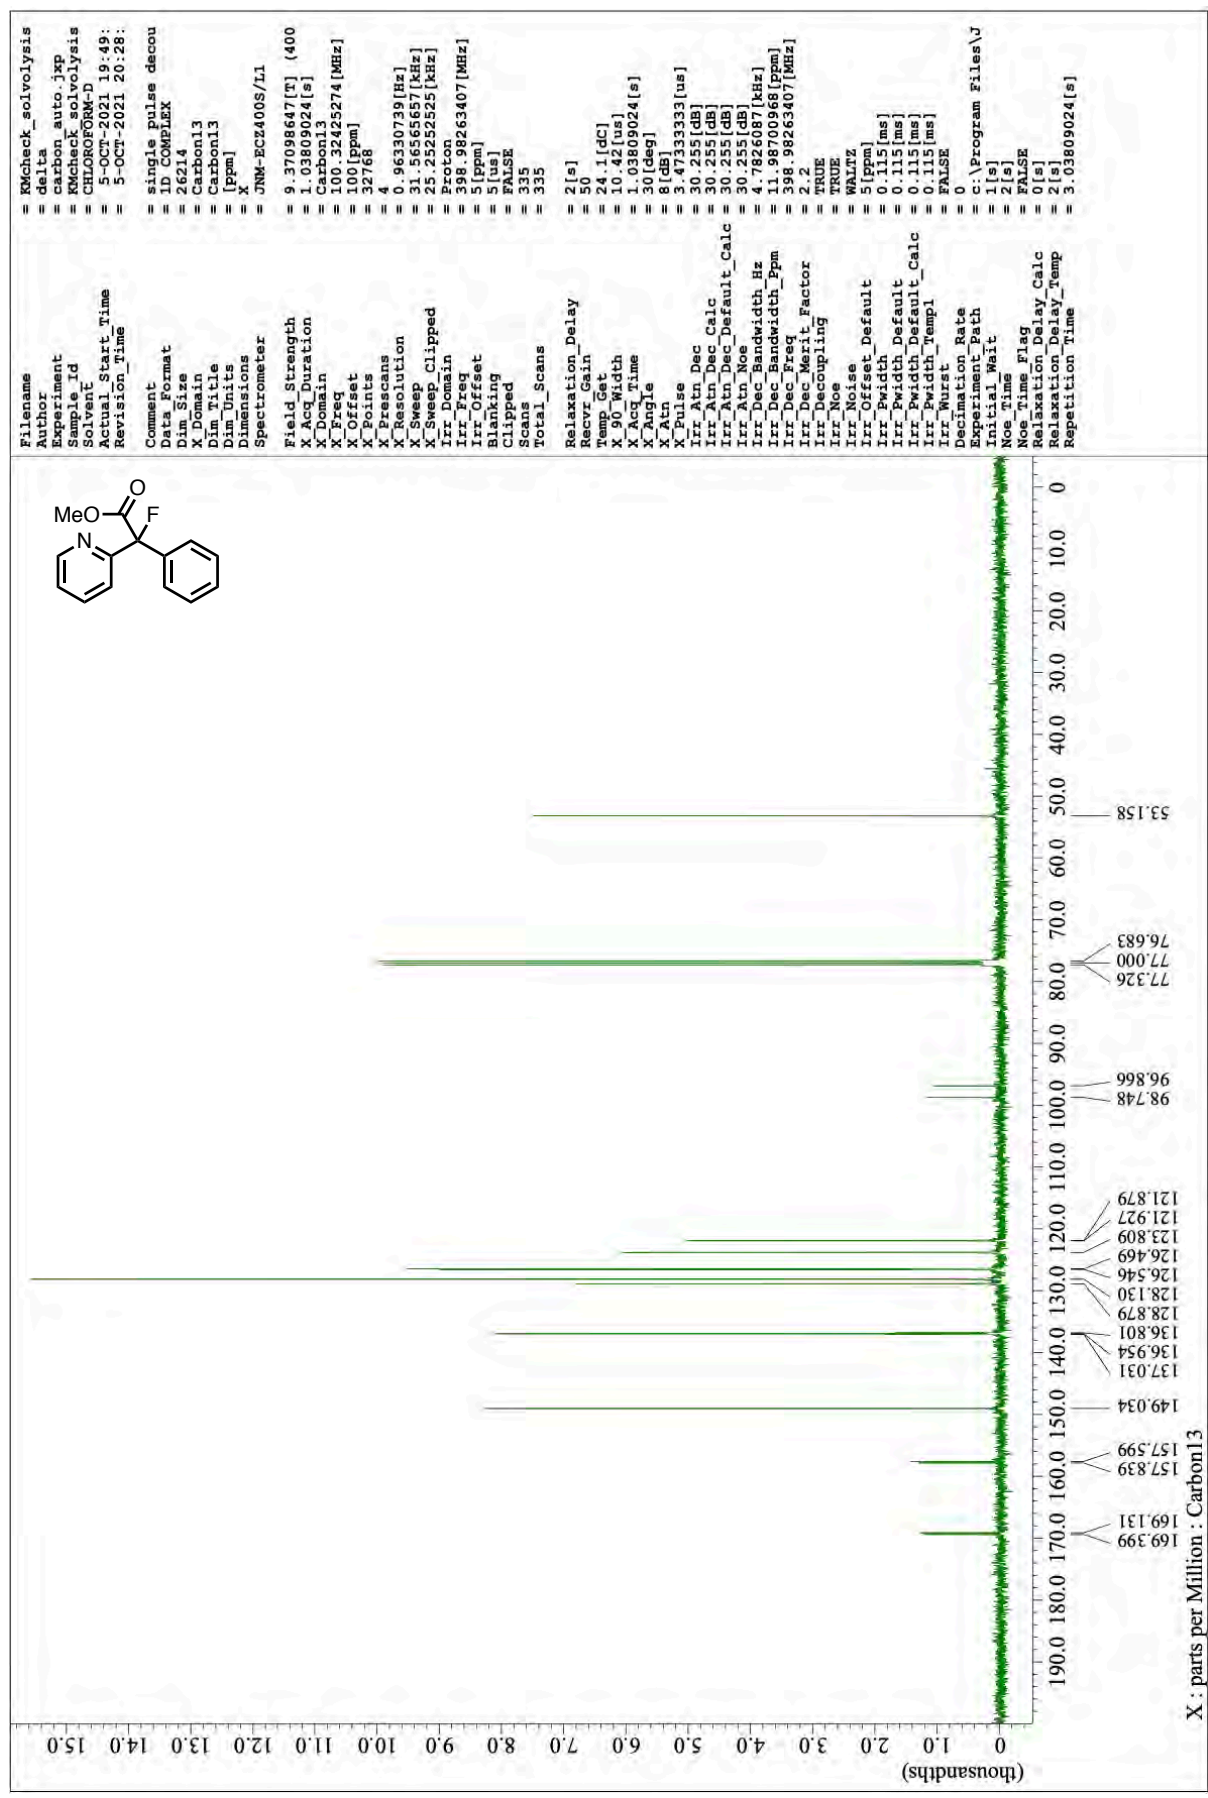

<sup>19</sup>F NMR of 14 (376 MHz, CDCl<sub>3</sub>)

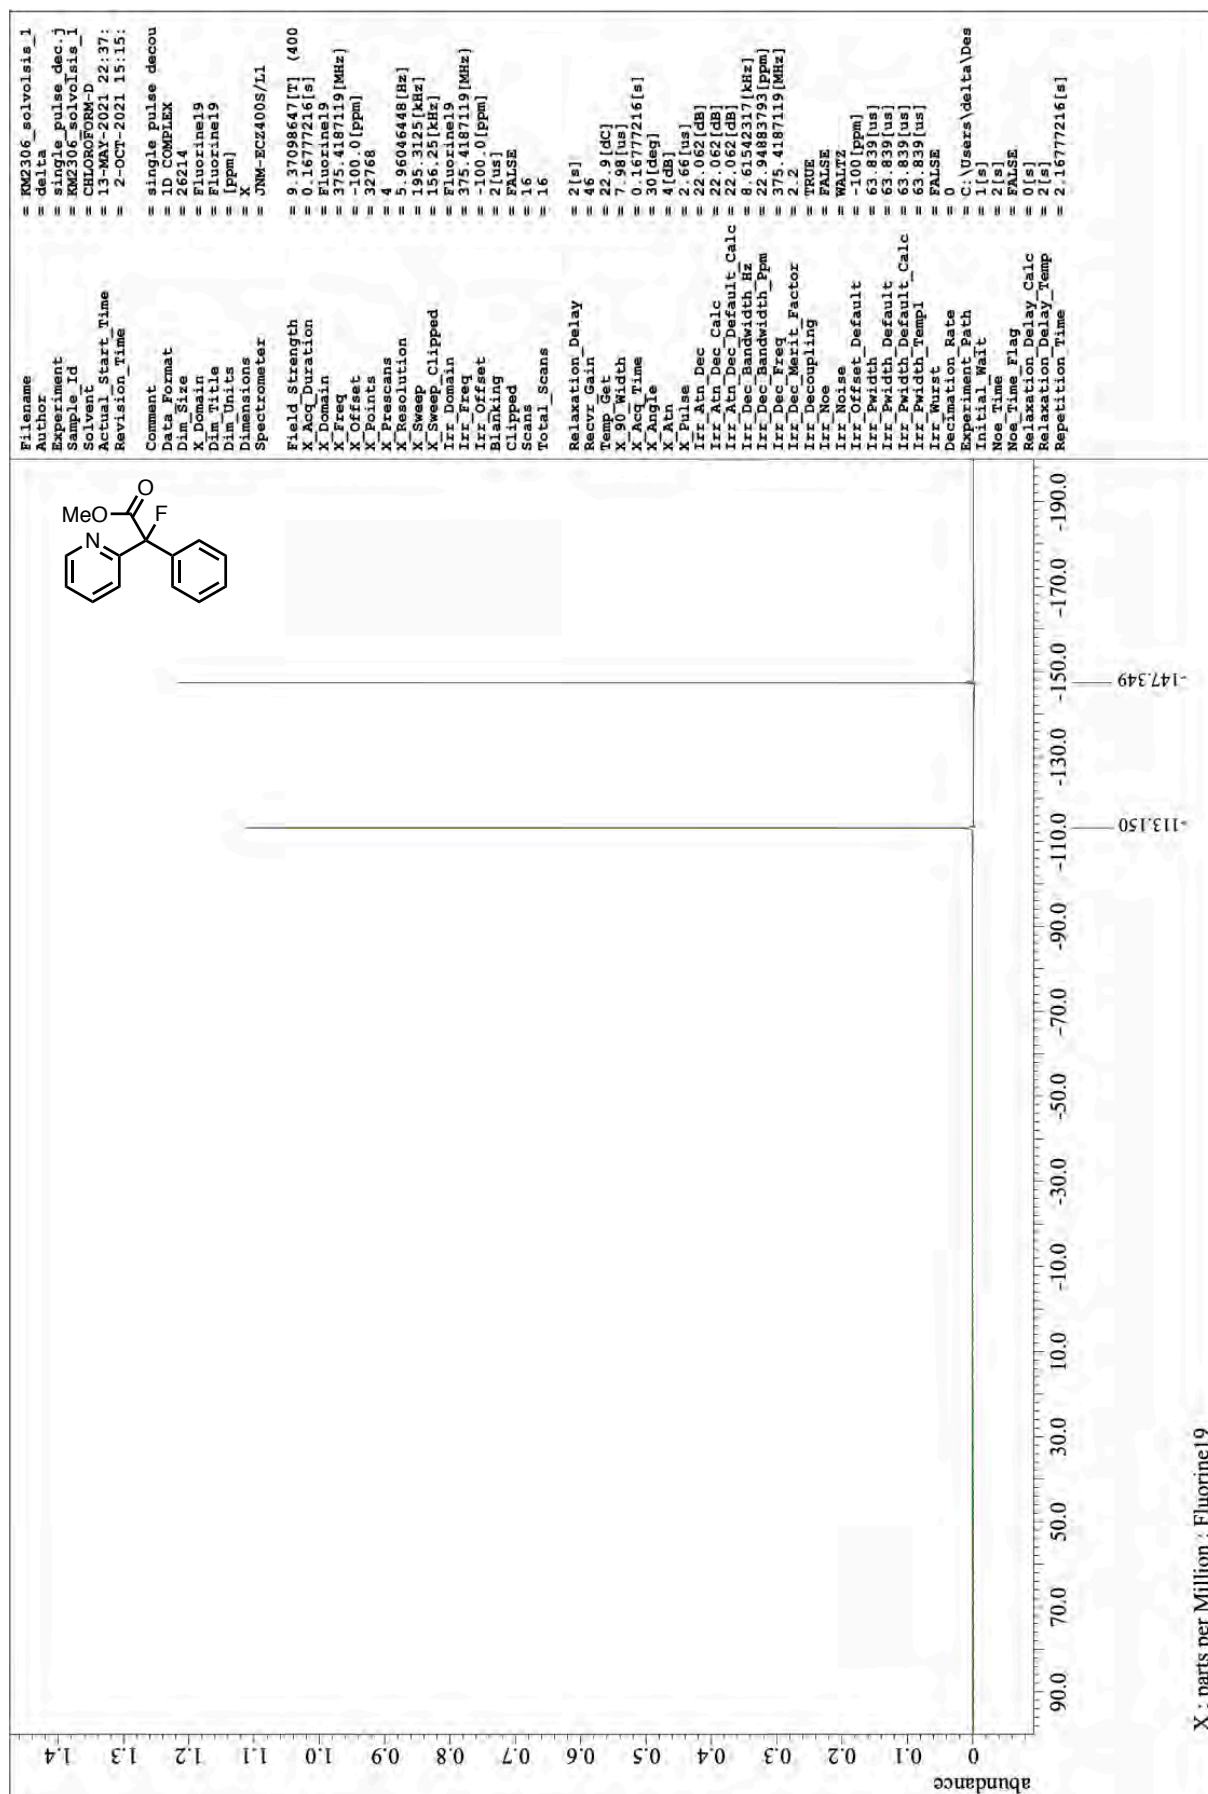

<sup>1</sup>H NMR of **15** (400 MHz, CDCl<sub>3</sub>)

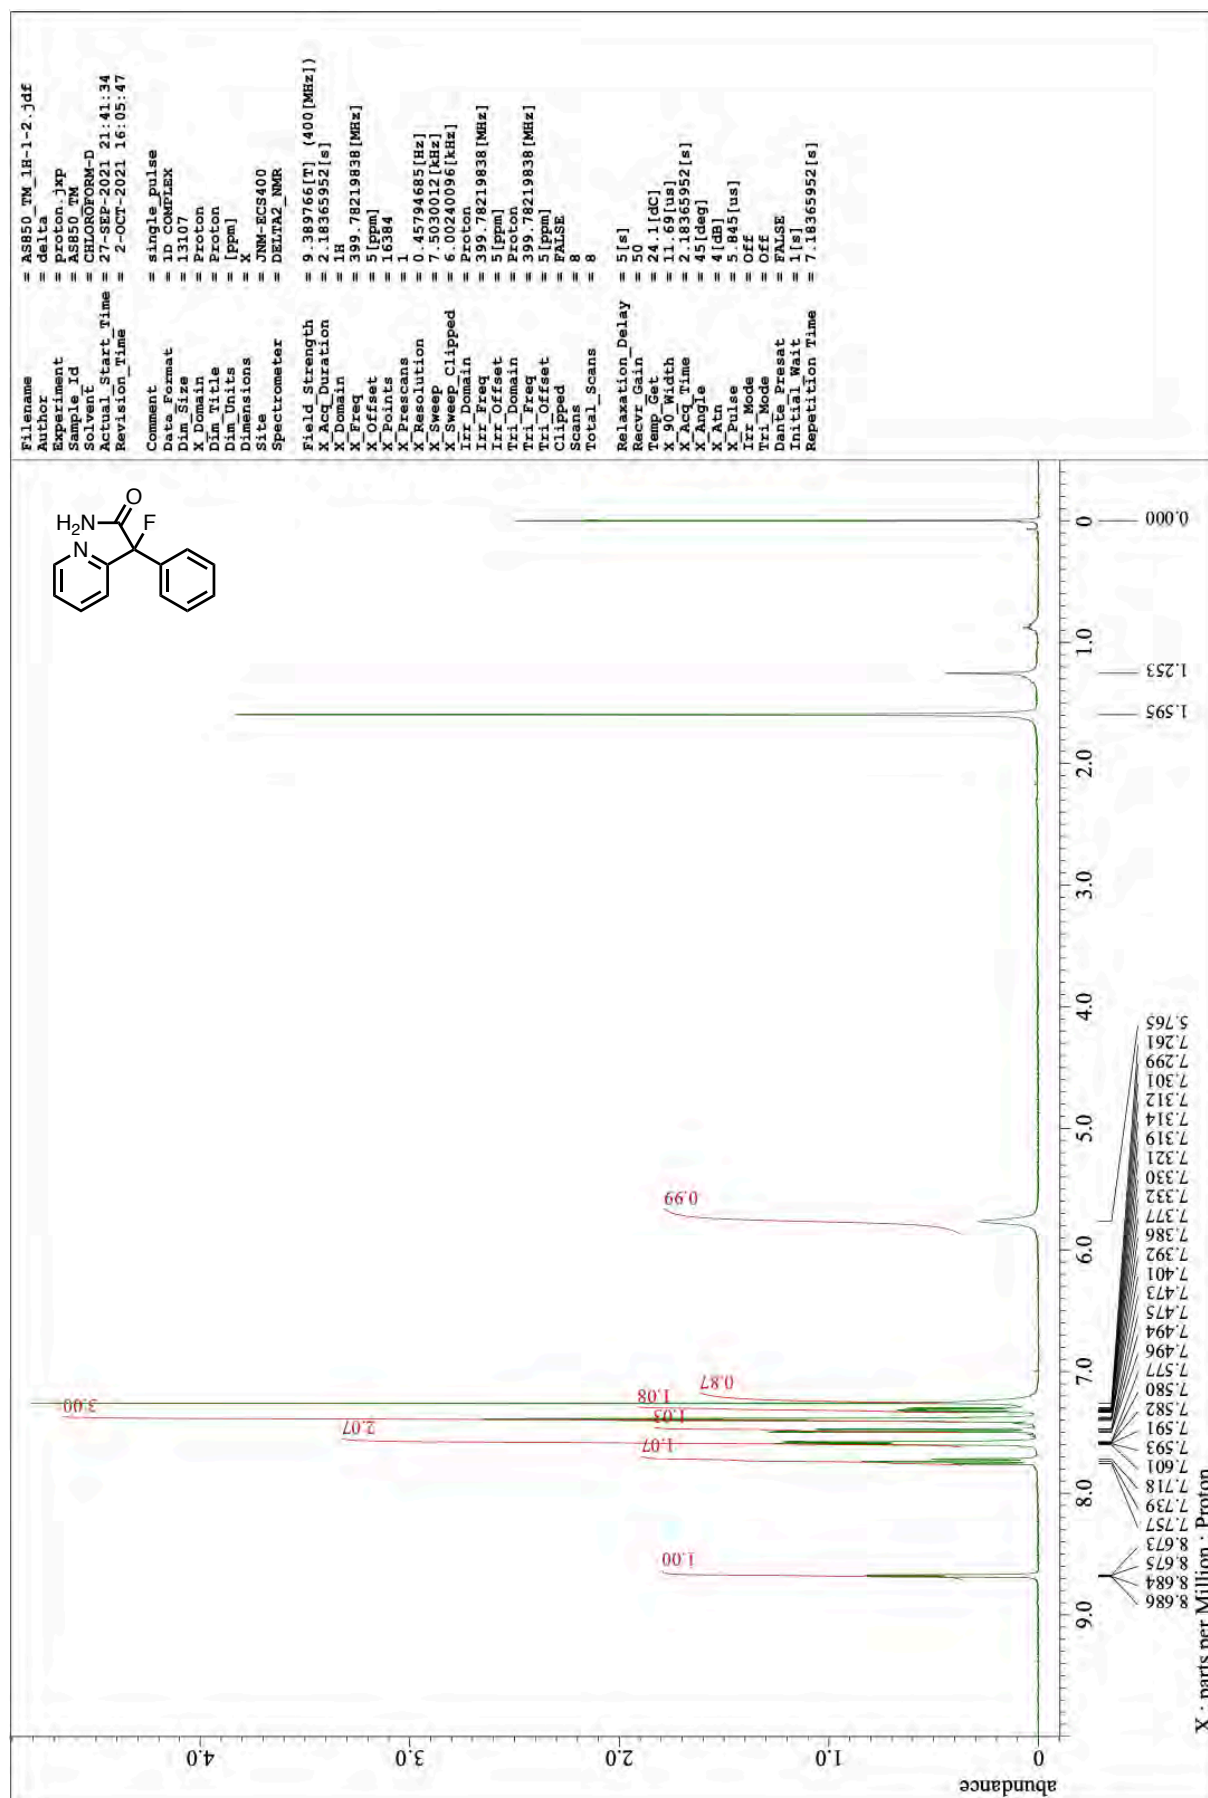

<sup>13</sup>C NMR of **15** (101 MHz, CDCl<sub>3</sub>)

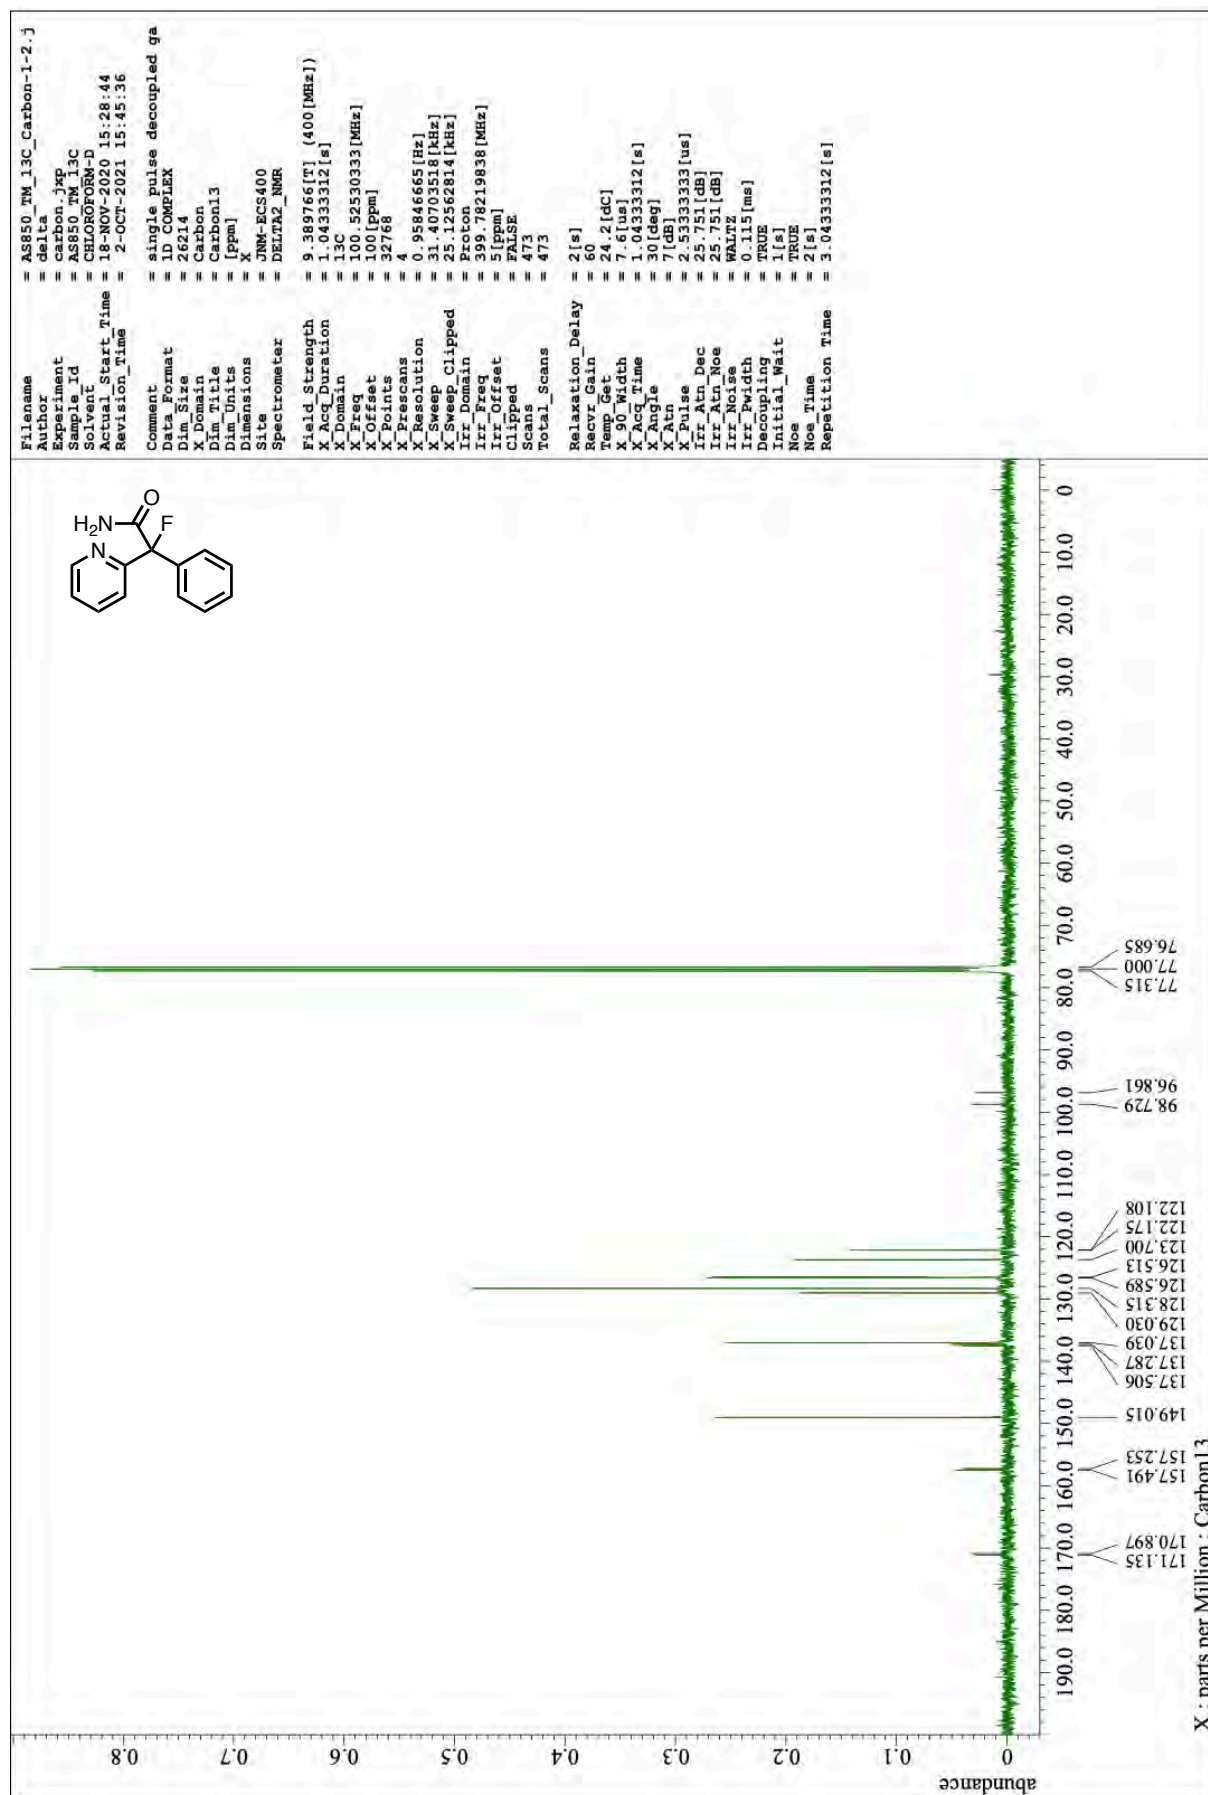

<sup>19</sup>F NMR of **15** (376 MHz, CDCl<sub>3</sub>)

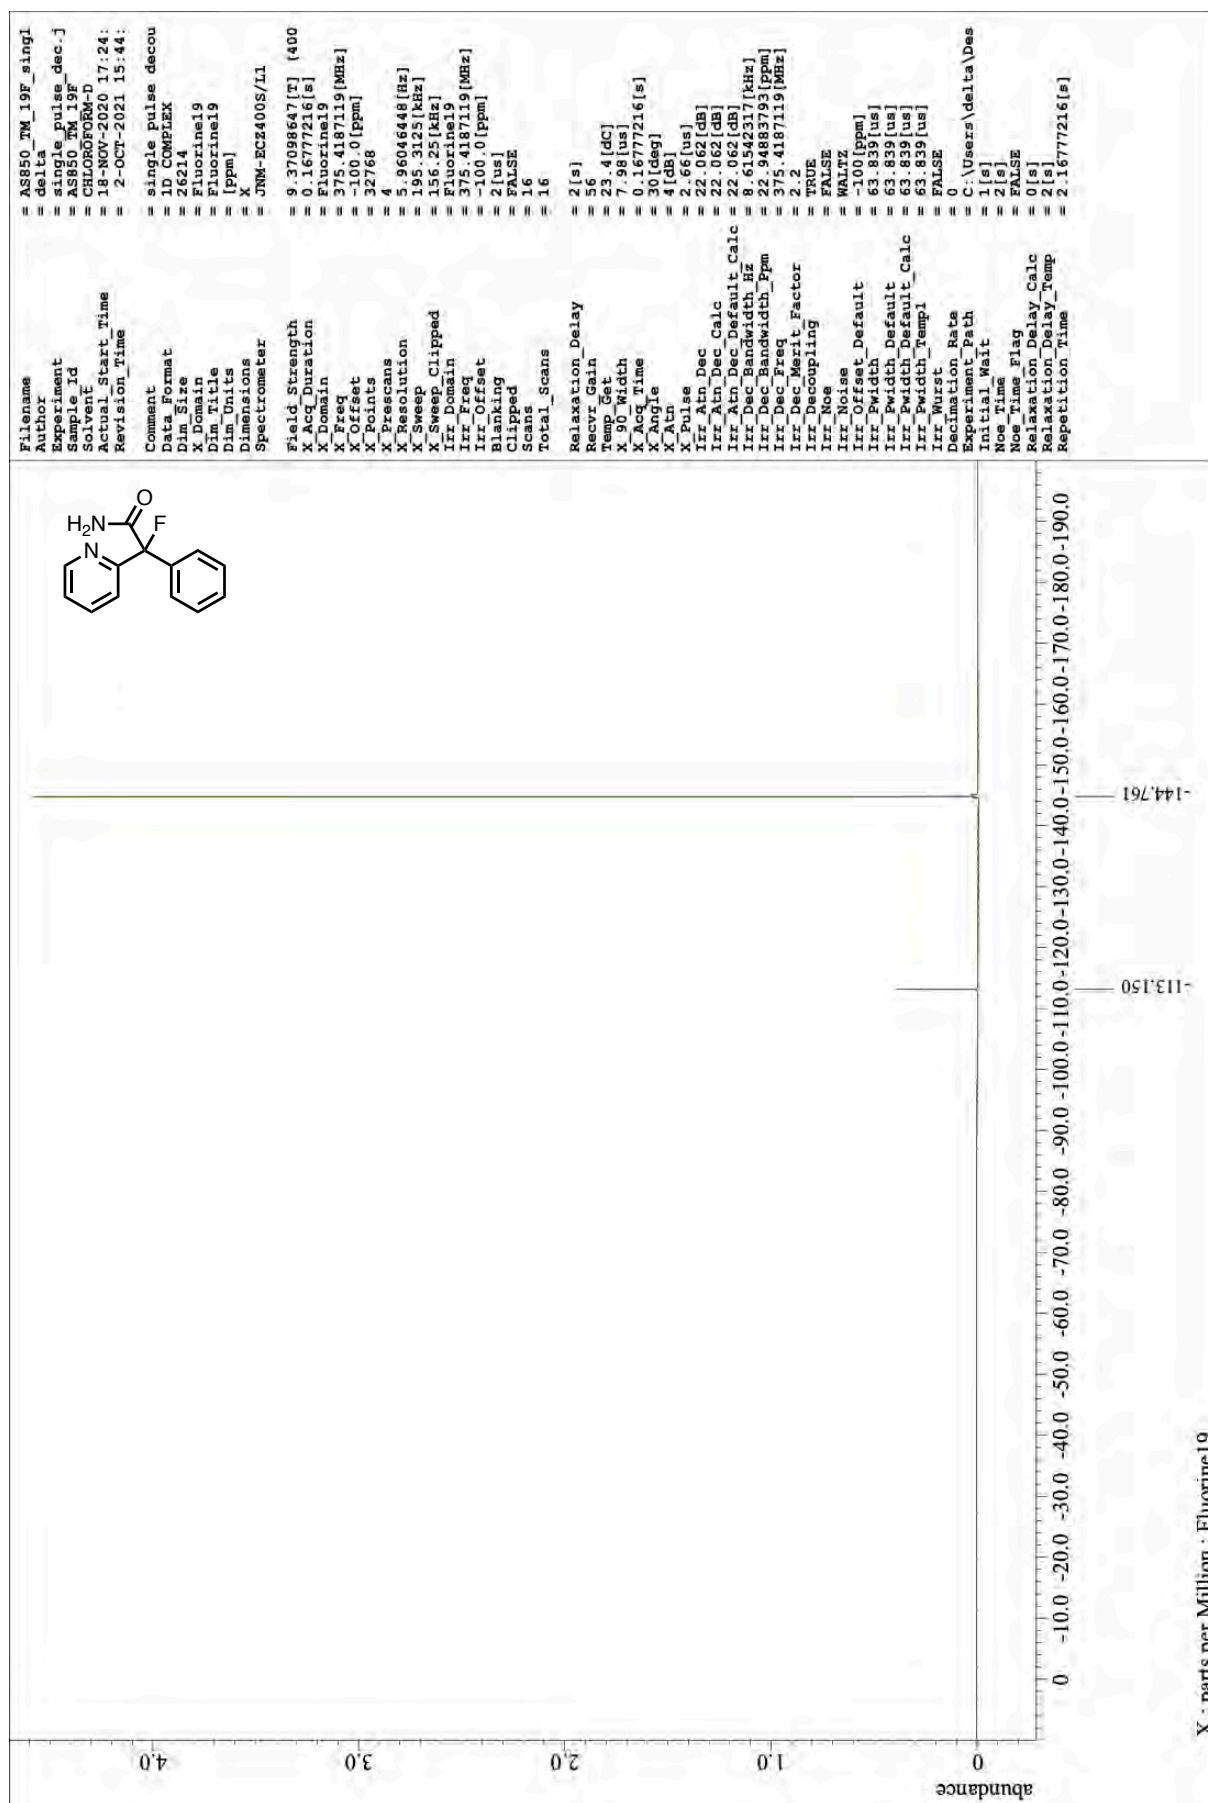

<sup>1</sup>H NMR of 16 (400 MHz, CDCl<sub>3</sub>)

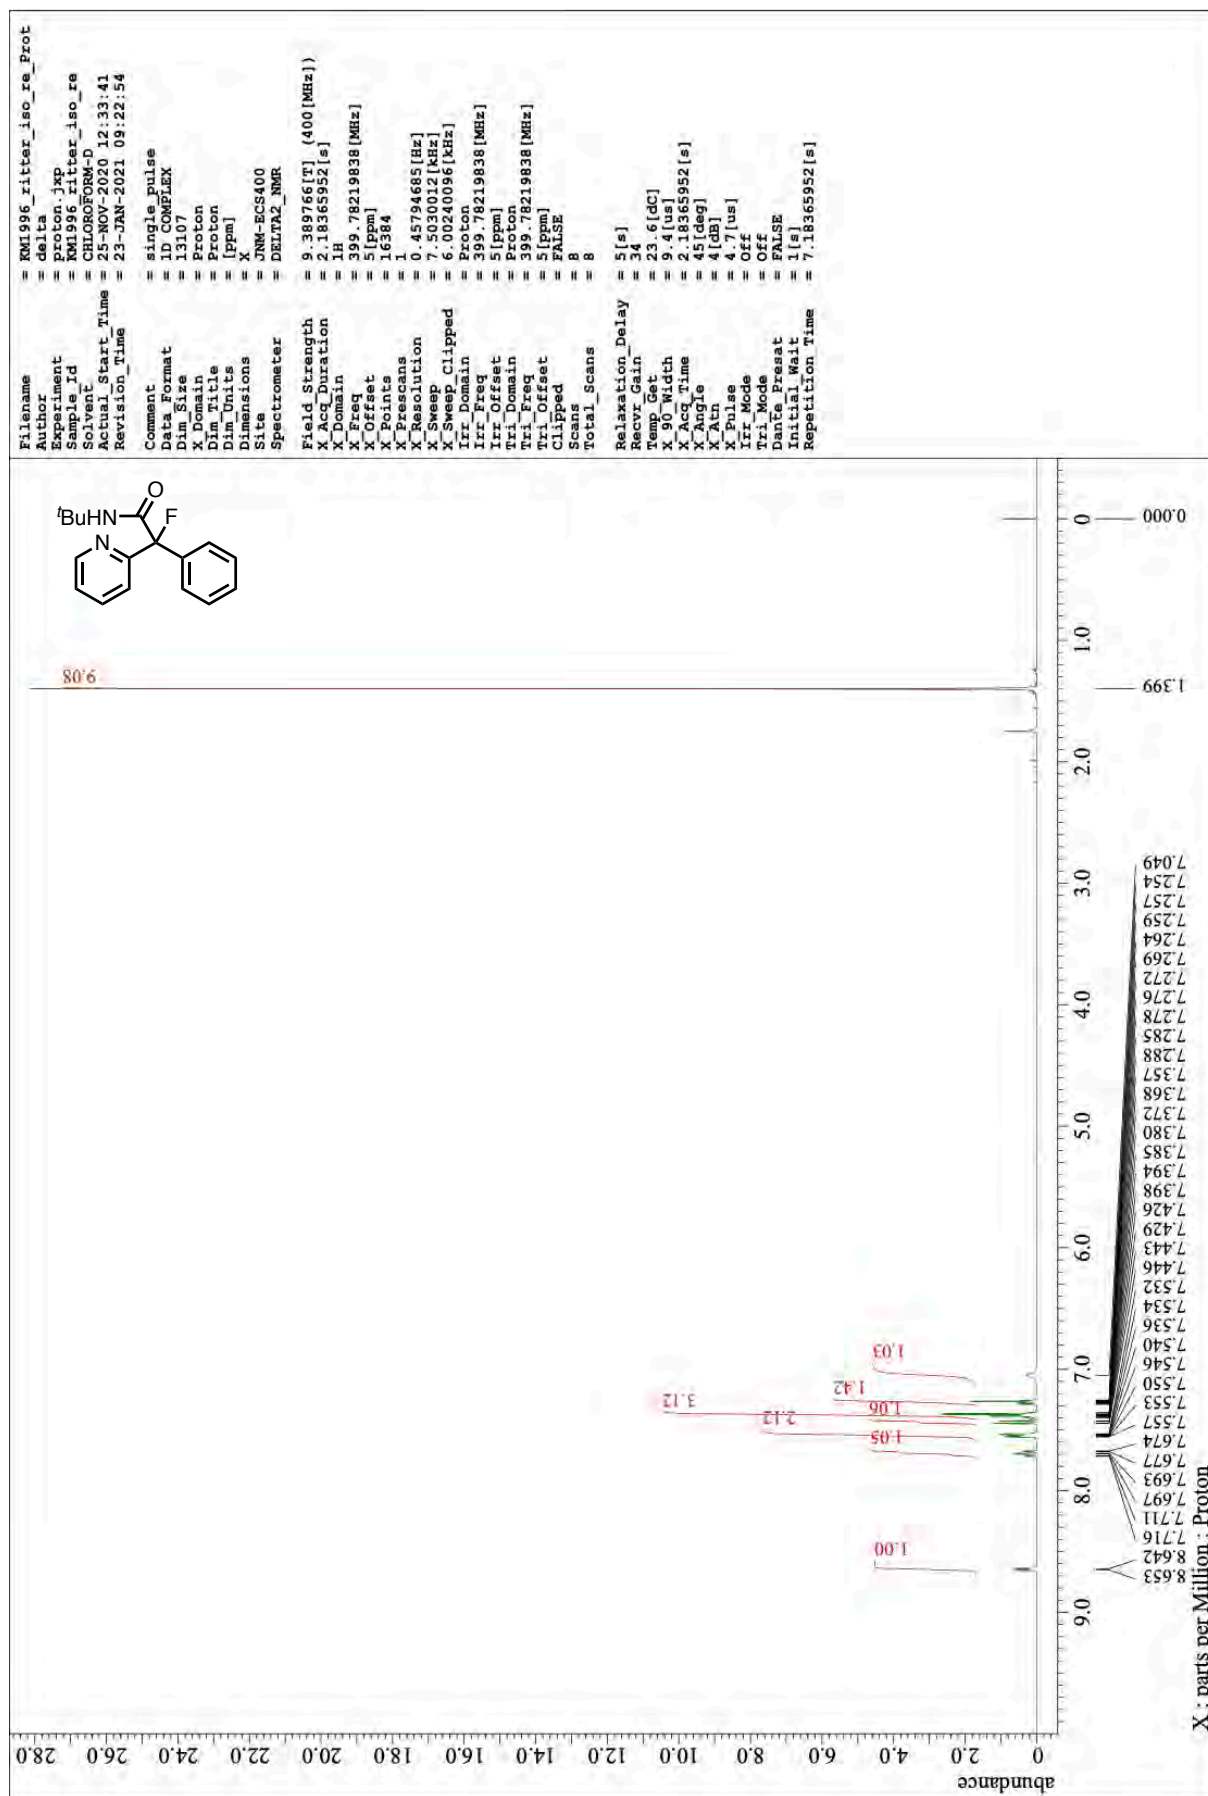

<sup>13</sup>C NMR of **16** (101 MHz, CDCl<sub>3</sub>)

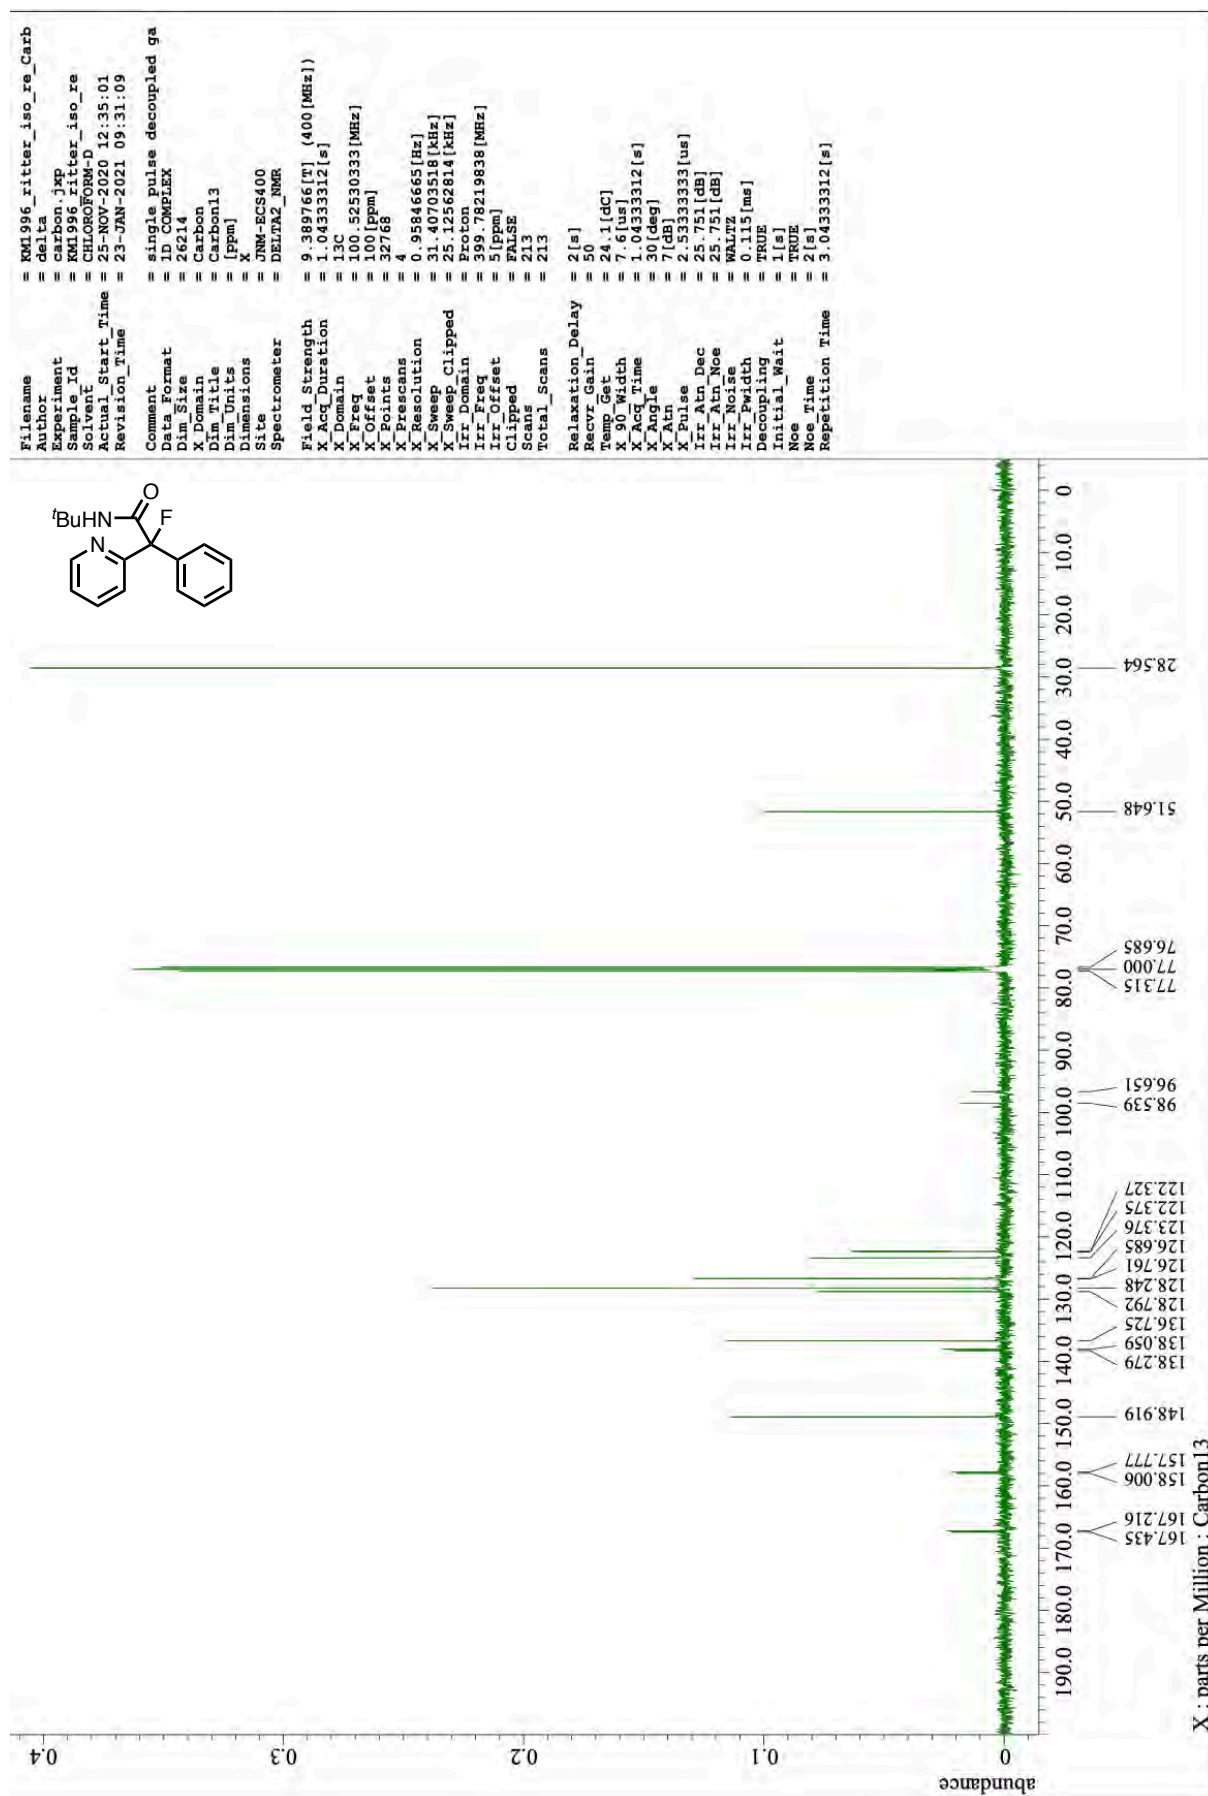

<sup>19</sup>F NMR of **16** (376 MHz, CDCl<sub>3</sub>)

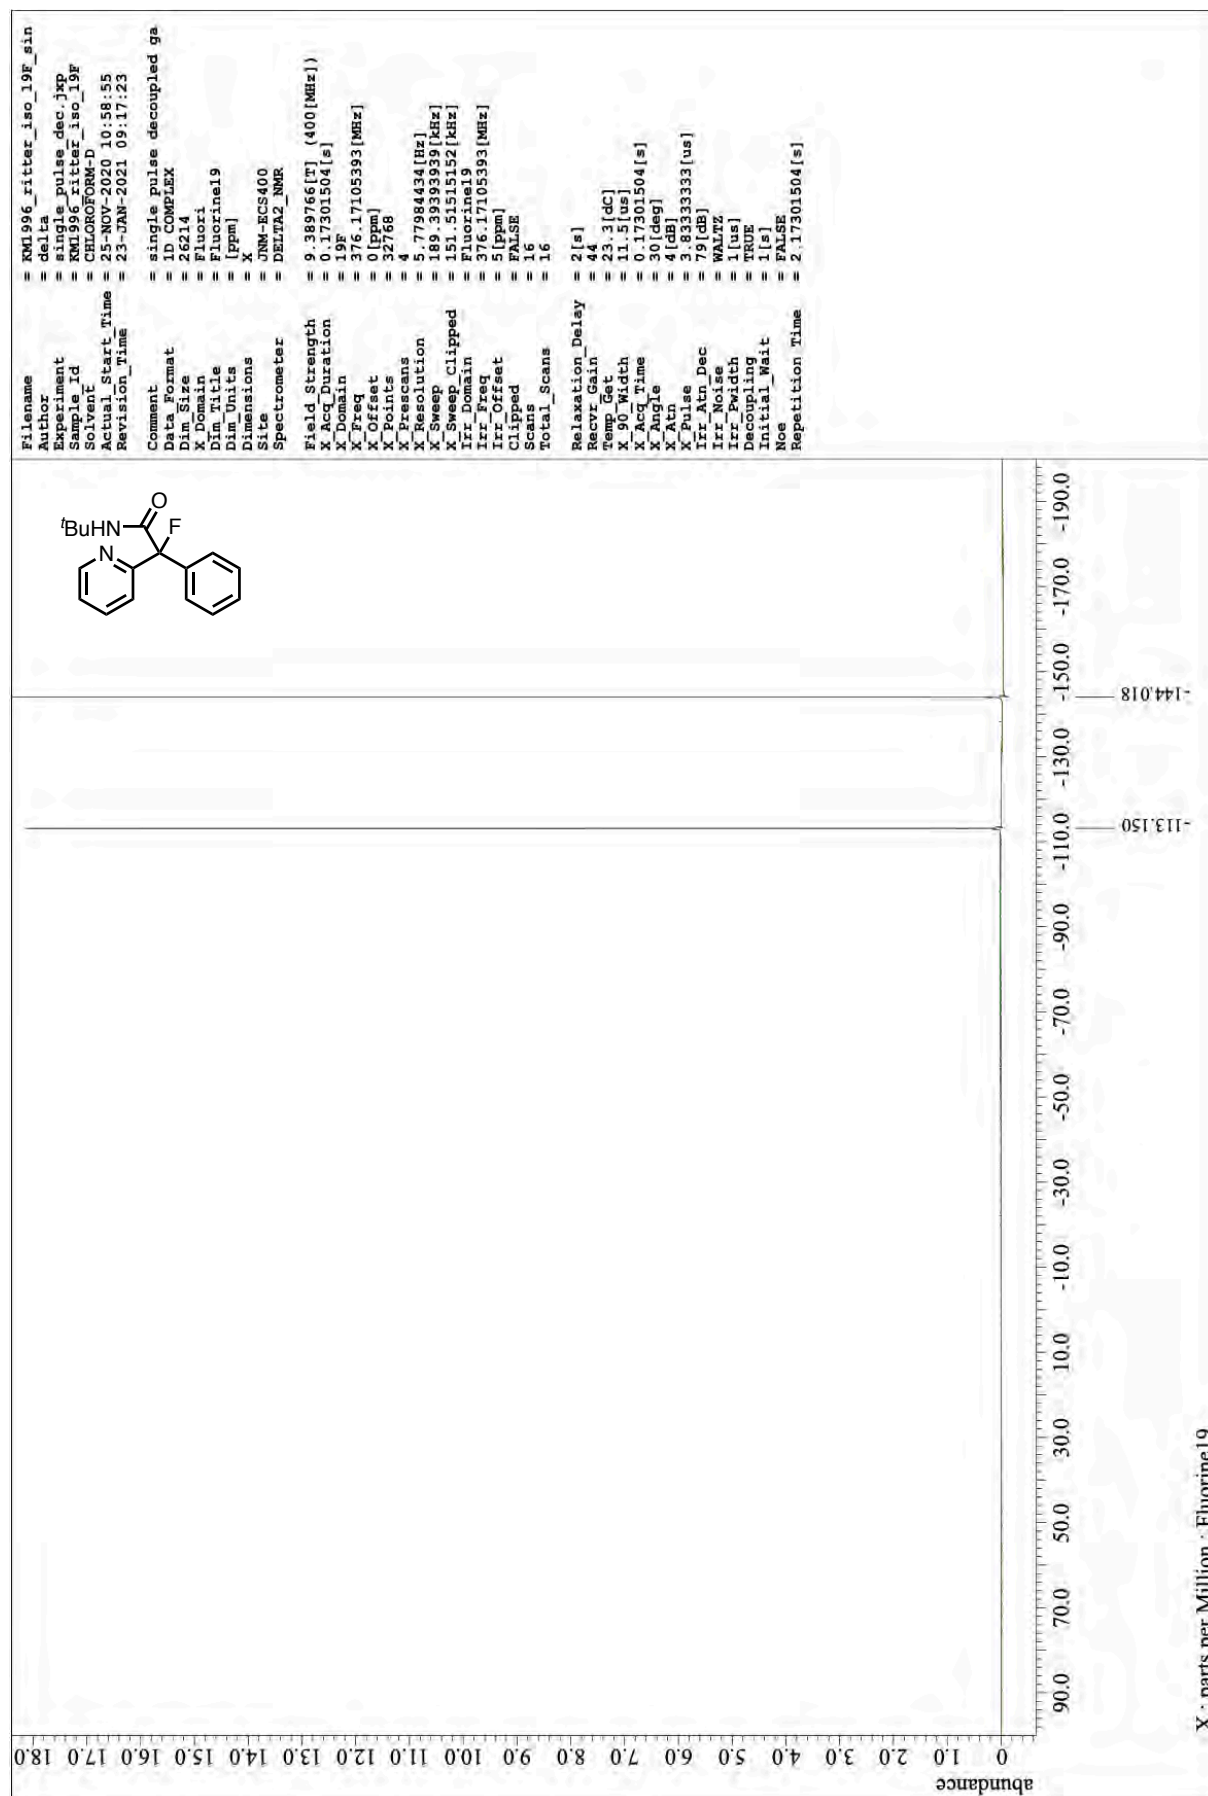





<sup>13</sup>C NMR of 17 (101 MHz, CDCl<sub>3</sub>)

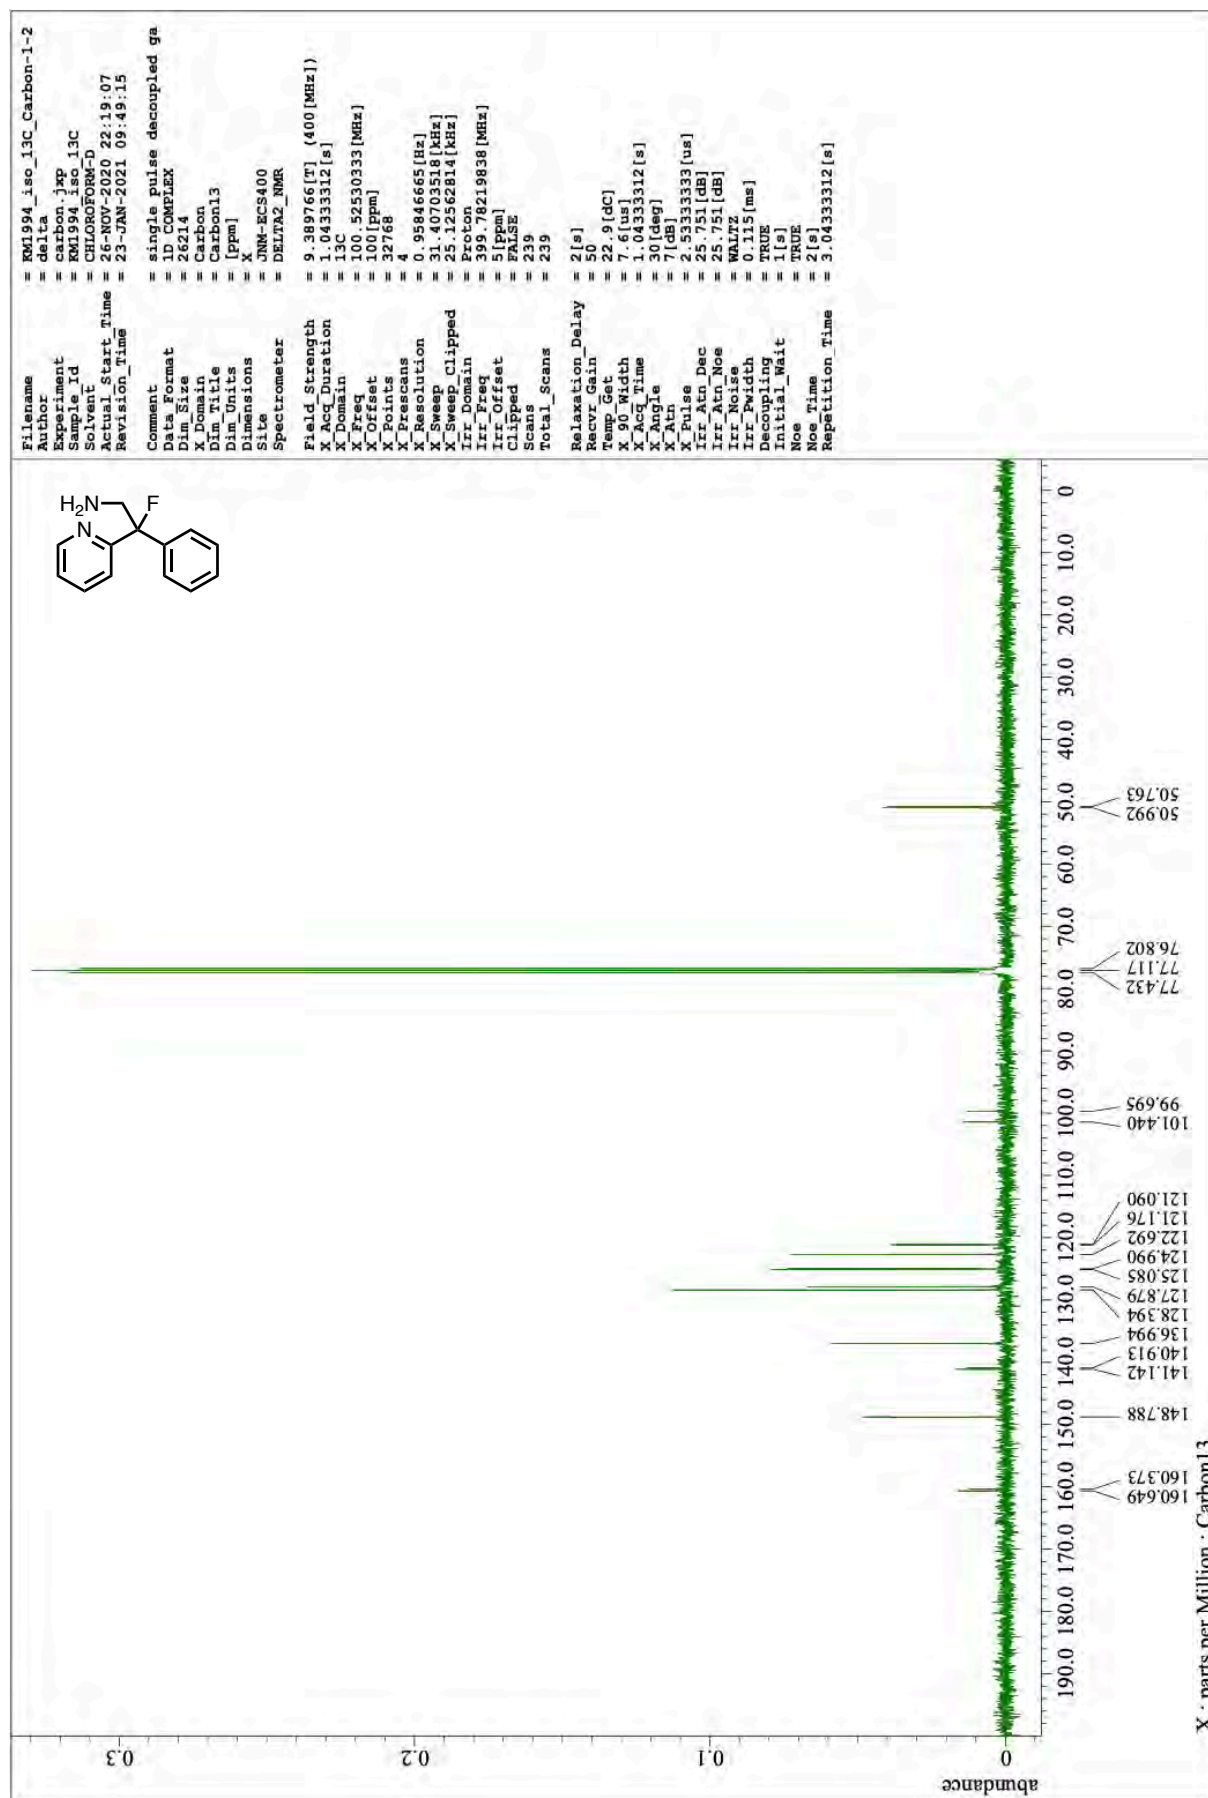

<sup>19</sup>F NMR of 17 (376 MHz, CDCl<sub>3</sub>)

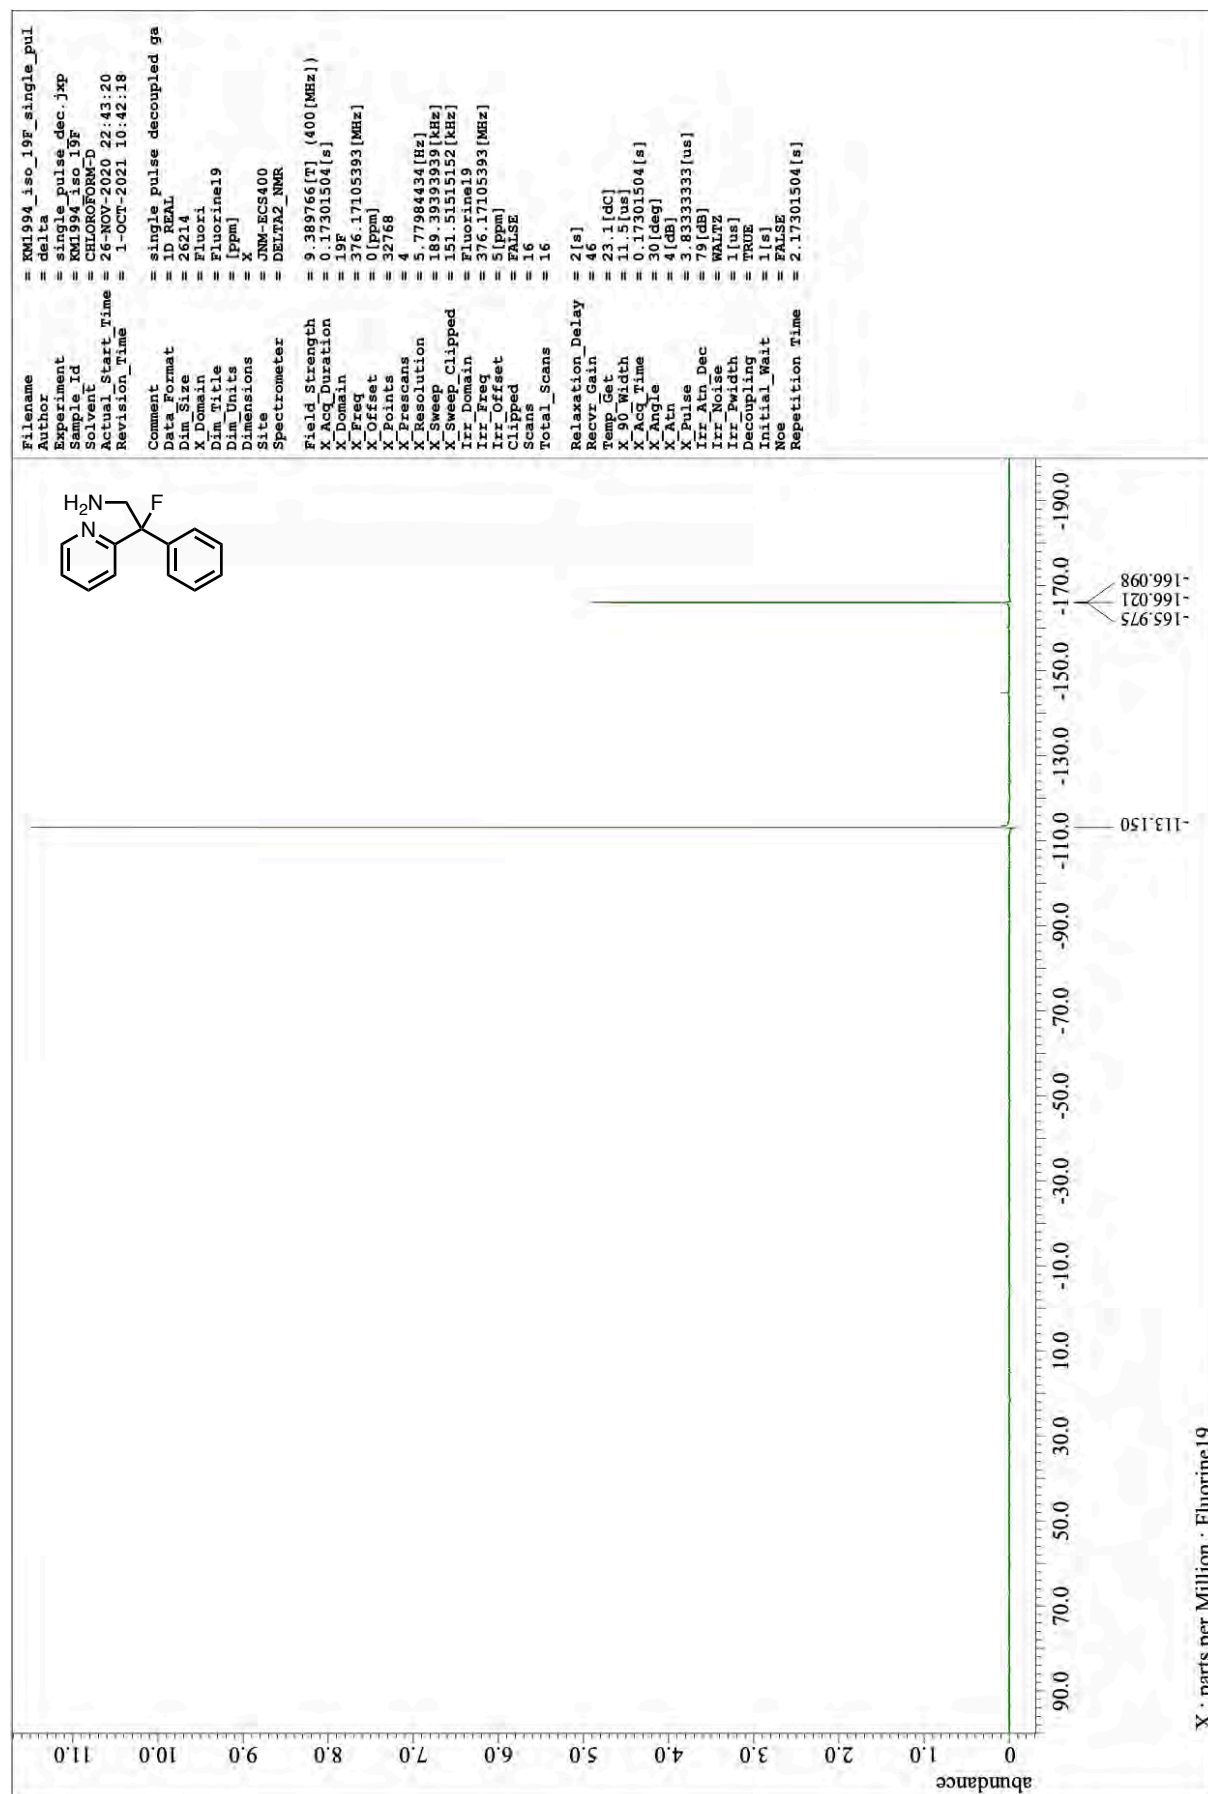

Supplement: SC-013-D1SC06273E-s001.pdf [file SC-013-D1SC06273E-s001.pdf]
